# Supplementary material for: Future life expectancy in Europe taking into account the impact of smoking, obesity, and alcohol
Source: eLife. 2021 Jul 6;10:e66590. doi: 10.7554/eLife.66590 (PMC8337079; doi:10.7554/eLife.66590)
Supplement: Figure 1—figure supplement 1—source data 1. [file elife-66590-fig1-figsupp1-data1.xlsx]

## Sheet: data
country	HMD_code	sex	year	age	lower95	median	upper95	lifestyle	method
Austria	AUT	Men	1990	std84		0.30343		smoking	Observed
Austria	AUT	Men	1991	std84		0.30509		smoking	Observed
Austria	AUT	Men	1992	std84		0.293309		smoking	Observed
Austria	AUT	Men	1993	std84		0.302455		smoking	Observed
Austria	AUT	Men	1994	std84		0.285672		smoking	Observed
Austria	AUT	Men	1995	std84		0.280271		smoking	Observed
Austria	AUT	Men	1996	std84		0.280095		smoking	Observed
Austria	AUT	Men	1997	std84		0.275197		smoking	Observed
Austria	AUT	Men	1998	std84		0.274721		smoking	Observed
Austria	AUT	Men	1999	std84		0.260621		smoking	Observed
Austria	AUT	Men	2000	std84		0.256385		smoking	Observed
Austria	AUT	Men	2001	std84		0.248726		smoking	Observed
Austria	AUT	Men	2002	std84		0.253215		smoking	Observed
Austria	AUT	Men	2003	std84		0.244295		smoking	Observed
Austria	AUT	Men	2004	std84		0.239277		smoking	Observed
Austria	AUT	Men	2005	std84		0.235234		smoking	Observed
Austria	AUT	Men	2006	std84		0.237028		smoking	Observed
Austria	AUT	Men	2007	std84		0.221251		smoking	Observed
Austria	AUT	Men	2008	std84		0.22699		smoking	Observed
Austria	AUT	Men	2009	std84		0.225874		smoking	Observed
Austria	AUT	Men	2010	std84		0.220777		smoking	Observed
Austria	AUT	Men	2011	std84		0.215105		smoking	Observed
Austria	AUT	Men	2012	std84		0.211456		smoking	Observed
Austria	AUT	Men	2013	std84		0.215188		smoking	Observed
Austria	AUT	Men	2014	std84		0.210771		smoking	Observed
Austria	AUT	Men	2015	std84	0.18499	0.201267	0.218677	smoking	Projected
Austria	AUT	Men	2016	std84	0.17997	0.197062	0.215273	smoking	Projected
Austria	AUT	Men	2017	std84	0.175263	0.192603	0.211506	smoking	Projected
Austria	AUT	Men	2018	std84	0.170278	0.188282	0.207667	smoking	Projected
Austria	AUT	Men	2019	std84	0.165552	0.18393	0.204108	smoking	Projected
Austria	AUT	Men	2020	std84	0.161267	0.179597	0.200382	smoking	Projected
Austria	AUT	Men	2021	std84	0.156624	0.175269	0.196365	smoking	Projected
Austria	AUT	Men	2022	std84	0.152122	0.171005	0.192649	smoking	Projected
Austria	AUT	Men	2023	std84	0.147956	0.166883	0.188508	smoking	Projected
Austria	AUT	Men	2024	std84	0.143437	0.162791	0.185329	smoking	Projected
Austria	AUT	Men	2025	std84	0.139485	0.158767	0.181596	smoking	Projected
Austria	AUT	Men	2026	std84	0.135405	0.154788	0.178109	smoking	Projected
Austria	AUT	Men	2027	std84	0.131366	0.150985	0.174842	smoking	Projected
Austria	AUT	Men	2028	std84	0.127714	0.147176	0.171506	smoking	Projected
Austria	AUT	Men	2029	std84	0.123955	0.143549	0.168608	smoking	Projected
Austria	AUT	Men	2030	std84	0.120447	0.140119	0.16583	smoking	Projected
Austria	AUT	Men	2031	std84	0.117083	0.136837	0.163459	smoking	Projected
Austria	AUT	Men	2032	std84	0.113997	0.133656	0.161103	smoking	Projected
Austria	AUT	Men	2033	std84	0.110814	0.13059	0.159231	smoking	Projected
Austria	AUT	Men	2034	std84	0.107792	0.127686	0.157527	smoking	Projected
Austria	AUT	Men	2035	std84	0.104781	0.124837	0.155959	smoking	Projected
Austria	AUT	Men	2036	std84	0.101941	0.121949	0.154523	smoking	Projected
Austria	AUT	Men	2037	std84	0.0992991	0.119463	0.1533	smoking	Projected
Austria	AUT	Men	2038	std84	0.0968745	0.116953	0.152446	smoking	Projected
Austria	AUT	Men	2039	std84	0.0945399	0.114749	0.151906	smoking	Projected
Austria	AUT	Men	2040	std84	0.0923915	0.112529	0.151016	smoking	Projected
Austria	AUT	Men	2041	std84	0.0904023	0.1105	0.151065	smoking	Projected
Austria	AUT	Men	2042	std84	0.0883493	0.108544	0.150807	smoking	Projected
Austria	AUT	Men	2043	std84	0.0865737	0.106712	0.150523	smoking	Projected
Austria	AUT	Men	2044	std84	0.0848858	0.104863	0.150312	smoking	Projected
Austria	AUT	Men	2045	std84	0.0833964	0.103214	0.150337	smoking	Projected
Austria	AUT	Men	2046	std84	0.0819757	0.101601	0.150263	smoking	Projected
Austria	AUT	Men	2047	std84	0.080609	0.100093	0.150257	smoking	Projected
Austria	AUT	Men	2048	std84	0.0794358	0.0986832	0.150175	smoking	Projected
Austria	AUT	Men	2049	std84	0.0783717	0.0973141	0.149965	smoking	Projected
Austria	AUT	Men	2050	std84	0.0773898	0.0959381	0.150042	smoking	Projected
Austria	AUT	Men	2051	std84	0.0765046	0.0947157	0.149732	smoking	Projected
Austria	AUT	Men	2052	std84	0.0756608	0.0935616	0.149419	smoking	Projected
Austria	AUT	Men	2053	std84	0.0748825	0.0924773	0.149374	smoking	Projected
Austria	AUT	Men	2054	std84	0.0742117	0.0913278	0.149051	smoking	Projected
Austria	AUT	Men	2055	std84	0.0736008	0.0903487	0.148968	smoking	Projected
Austria	AUT	Men	2056	std84	0.0730031	0.0893283	0.14845	smoking	Projected
Austria	AUT	Men	2057	std84	0.0724943	0.0883565	0.147982	smoking	Projected
Austria	AUT	Men	2058	std84	0.0720243	0.0874457	0.147366	smoking	Projected
Austria	AUT	Men	2059	std84	0.0715804	0.0865279	0.146912	smoking	Projected
Austria	AUT	Men	2060	std84	0.0712516	0.0856694	0.146206	smoking	Projected
Austria	AUT	Men	2061	std84	0.0709025	0.0848419	0.146042	smoking	Projected
Austria	AUT	Men	2062	std84	0.0705982	0.0840551	0.145491	smoking	Projected
Austria	AUT	Men	2063	std84	0.0703214	0.083285	0.144752	smoking	Projected
Austria	AUT	Men	2064	std84	0.0700851	0.0825946	0.14416	smoking	Projected
Austria	AUT	Men	2065	std84	0.0698599	0.0818458	0.143579	smoking	Projected
Austria	AUT	Men	1990	std84		0.111733		alcohol	Observed
Austria	AUT	Men	1991	std84		0.113896		alcohol	Observed
Austria	AUT	Men	1992	std84		0.114374		alcohol	Observed
Austria	AUT	Men	1993	std84		0.114929		alcohol	Observed
Austria	AUT	Men	1994	std84		0.115896		alcohol	Observed
Austria	AUT	Men	1995	std84		0.116109		alcohol	Observed
Austria	AUT	Men	1996	std84		0.115464		alcohol	Observed
Austria	AUT	Men	1997	std84		0.113055		alcohol	Observed
Austria	AUT	Men	1998	std84		0.111482		alcohol	Observed
Austria	AUT	Men	1999	std84		0.109982		alcohol	Observed
Austria	AUT	Men	2000	std84		0.111279		alcohol	Observed
Austria	AUT	Men	2001	std84		0.111418		alcohol	Observed
Austria	AUT	Men	2002	std84		0.112433		alcohol	Observed
Austria	AUT	Men	2003	std84		0.112282		alcohol	Observed
Austria	AUT	Men	2004	std84		0.115674		alcohol	Observed
Austria	AUT	Men	2005	std84		0.116061		alcohol	Observed
Austria	AUT	Men	2006	std84		0.115855		alcohol	Observed
Austria	AUT	Men	2007	std84		0.114581		alcohol	Observed
Austria	AUT	Men	2008	std84		0.114403		alcohol	Observed
Austria	AUT	Men	2009	std84		0.113777		alcohol	Observed
Austria	AUT	Men	2010	std84		0.113206		alcohol	Observed
Austria	AUT	Men	2011	std84		0.112672		alcohol	Observed
Austria	AUT	Men	2012	std84		0.111419		alcohol	Observed
Austria	AUT	Men	2013	std84		0.110308		alcohol	Observed
Austria	AUT	Men	2014	std84		0.110459		alcohol	Observed
Austria	AUT	Men	2015	std84	0.109822	0.112058	0.114367	alcohol	Projected
Austria	AUT	Men	2016	std84	0.108562	0.111701	0.114949	alcohol	Projected
Austria	AUT	Men	2017	std84	0.107479	0.111302	0.115269	alcohol	Projected
Austria	AUT	Men	2018	std84	0.106448	0.110867	0.11544	alcohol	Projected
Austria	AUT	Men	2019	std84	0.105485	0.110415	0.115479	alcohol	Projected
Austria	AUT	Men	2020	std84	0.10456	0.109926	0.115498	alcohol	Projected
Austria	AUT	Men	2021	std84	0.10366	0.109386	0.115395	alcohol	Projected
Austria	AUT	Men	2022	std84	0.102771	0.108823	0.11525	alcohol	Projected
Austria	AUT	Men	2023	std84	0.101871	0.10824	0.115052	alcohol	Projected
Austria	AUT	Men	2024	std84	0.10104	0.107654	0.114808	alcohol	Projected
Austria	AUT	Men	2025	std84	0.100077	0.107079	0.114448	alcohol	Projected
Austria	AUT	Men	2026	std84	0.0992084	0.106468	0.114158	alcohol	Projected
Austria	AUT	Men	2027	std84	0.0983345	0.105844	0.113829	alcohol	Projected
Austria	AUT	Men	2028	std84	0.0975109	0.105202	0.113473	alcohol	Projected
Austria	AUT	Men	2029	std84	0.0966746	0.104569	0.113072	alcohol	Projected
Austria	AUT	Men	2030	std84	0.0957731	0.103941	0.112747	alcohol	Projected
Austria	AUT	Men	2031	std84	0.0949697	0.103282	0.112324	alcohol	Projected
Austria	AUT	Men	2032	std84	0.0941309	0.10268	0.111917	alcohol	Projected
Austria	AUT	Men	2033	std84	0.0933531	0.102042	0.111507	alcohol	Projected
Austria	AUT	Men	2034	std84	0.0925691	0.101413	0.111116	alcohol	Projected
Austria	AUT	Men	2035	std84	0.0918383	0.100798	0.110657	alcohol	Projected
Austria	AUT	Men	2036	std84	0.0910889	0.100176	0.110218	alcohol	Projected
Austria	AUT	Men	2037	std84	0.0902962	0.0995667	0.109812	alcohol	Projected
Austria	AUT	Men	2038	std84	0.0895972	0.0989854	0.109397	alcohol	Projected
Austria	AUT	Men	2039	std84	0.0888869	0.0983968	0.109041	alcohol	Projected
Austria	AUT	Men	2040	std84	0.0882032	0.0978709	0.108614	alcohol	Projected
Austria	AUT	Men	2041	std84	0.0875906	0.097331	0.108201	alcohol	Projected
Austria	AUT	Men	2042	std84	0.0869041	0.0967525	0.107915	alcohol	Projected
Austria	AUT	Men	2043	std84	0.0862752	0.096231	0.107563	alcohol	Projected
Austria	AUT	Men	2044	std84	0.0856006	0.0957497	0.10726	alcohol	Projected
Austria	AUT	Men	2045	std84	0.0850415	0.0952573	0.10692	alcohol	Projected
Austria	AUT	Men	2046	std84	0.084453	0.0947974	0.106647	alcohol	Projected
Austria	AUT	Men	2047	std84	0.0838564	0.0943666	0.106373	alcohol	Projected
Austria	AUT	Men	2048	std84	0.0833828	0.0939729	0.106203	alcohol	Projected
Austria	AUT	Men	2049	std84	0.0829566	0.0936195	0.105896	alcohol	Projected
Austria	AUT	Men	2050	std84	0.082503	0.0932958	0.105757	alcohol	Projected
Austria	AUT	Men	2051	std84	0.0820456	0.0929935	0.105684	alcohol	Projected
Austria	AUT	Men	2052	std84	0.0816535	0.0927663	0.10561	alcohol	Projected
Austria	AUT	Men	2053	std84	0.0812276	0.0925248	0.105543	alcohol	Projected
Austria	AUT	Men	2054	std84	0.0808133	0.0923114	0.105593	alcohol	Projected
Austria	AUT	Men	2055	std84	0.0804284	0.0921054	0.105669	alcohol	Projected
Austria	AUT	Men	2056	std84	0.0800338	0.0918812	0.105662	alcohol	Projected
Austria	AUT	Men	2057	std84	0.0796903	0.0917307	0.105801	alcohol	Projected
Austria	AUT	Men	2058	std84	0.0793838	0.0915573	0.105817	alcohol	Projected
Austria	AUT	Men	2059	std84	0.0789675	0.0914333	0.105978	alcohol	Projected
Austria	AUT	Men	2060	std84	0.0787096	0.0913027	0.106167	alcohol	Projected
Austria	AUT	Men	2061	std84	0.0783051	0.0911535	0.10634	alcohol	Projected
Austria	AUT	Men	2062	std84	0.0778733	0.090977	0.106446	alcohol	Projected
Austria	AUT	Men	2063	std84	0.0774968	0.0908326	0.106511	alcohol	Projected
Austria	AUT	Men	2064	std84	0.0770882	0.0906619	0.106669	alcohol	Projected
Austria	AUT	Men	2065	std84	0.0767189	0.0904749	0.106806	alcohol	Projected
Austria	AUT	Men	1990	std84		0.0549854		obesity	Observed
Austria	AUT	Men	1991	std84		0.05681		obesity	Observed
Austria	AUT	Men	1992	std84		0.058673		obesity	Observed
Austria	AUT	Men	1993	std84		0.0605703		obesity	Observed
Austria	AUT	Men	1994	std84		0.0624972		obesity	Observed
Austria	AUT	Men	1995	std84		0.0644552		obesity	Observed
Austria	AUT	Men	1996	std84		0.0664331		obesity	Observed
Austria	AUT	Men	1997	std84		0.0684359		obesity	Observed
Austria	AUT	Men	1998	std84		0.070453		obesity	Observed
Austria	AUT	Men	1999	std84		0.0724837		obesity	Observed
Austria	AUT	Men	2000	std84		0.0745308		obesity	Observed
Austria	AUT	Men	2001	std84		0.0765877		obesity	Observed
Austria	AUT	Men	2002	std84		0.0786532		obesity	Observed
Austria	AUT	Men	2003	std84		0.0807287		obesity	Observed
Austria	AUT	Men	2004	std84		0.0828132		obesity	Observed
Austria	AUT	Men	2005	std84		0.0849069		obesity	Observed
Austria	AUT	Men	2006	std84		0.0870102		obesity	Observed
Austria	AUT	Men	2007	std84		0.0891182		obesity	Observed
Austria	AUT	Men	2008	std84		0.0912447		obesity	Observed
Austria	AUT	Men	2009	std84		0.0933841		obesity	Observed
Austria	AUT	Men	2010	std84		0.0955471		obesity	Observed
Austria	AUT	Men	2011	std84		0.0977321		obesity	Observed
Austria	AUT	Men	2012	std84		0.0999363		obesity	Observed
Austria	AUT	Men	2013	std84		0.102173		obesity	Observed
Austria	AUT	Men	2014	std84		0.104443		obesity	Observed
Austria	AUT	Men	2015	std84		0.10675		obesity	Observed
Austria	AUT	Men	2016	std84		0.109106		obesity	Observed
Austria	AUT	Men	2017	std84	0.111803	0.111906	0.112008	obesity	Projected
Austria	AUT	Men	2018	std84	0.114038	0.114274	0.11451	obesity	Projected
Austria	AUT	Men	2019	std84	0.116201	0.116603	0.117009	obesity	Projected
Austria	AUT	Men	2020	std84	0.118278	0.118886	0.119501	obesity	Projected
Austria	AUT	Men	2021	std84	0.120266	0.121113	0.121971	obesity	Projected
Austria	AUT	Men	2022	std84	0.122162	0.123277	0.124413	obesity	Projected
Austria	AUT	Men	2023	std84	0.123959	0.125373	0.126815	obesity	Projected
Austria	AUT	Men	2024	std84	0.12566	0.127388	0.12917	obesity	Projected
Austria	AUT	Men	2025	std84	0.127237	0.12932	0.131468	obesity	Projected
Austria	AUT	Men	2026	std84	0.128697	0.131156	0.133709	obesity	Projected
Austria	AUT	Men	2027	std84	0.130034	0.132889	0.135874	obesity	Projected
Austria	AUT	Men	2028	std84	0.131235	0.134516	0.13796	obesity	Projected
Austria	AUT	Men	2029	std84	0.132315	0.136035	0.13995	obesity	Projected
Austria	AUT	Men	2030	std84	0.133236	0.13743	0.141854	obesity	Projected
Austria	AUT	Men	2031	std84	0.134026	0.138698	0.143651	obesity	Projected
Austria	AUT	Men	2032	std84	0.134659	0.139846	0.145366	obesity	Projected
Austria	AUT	Men	2033	std84	0.135135	0.140853	0.146953	obesity	Projected
Austria	AUT	Men	2034	std84	0.135477	0.141717	0.148449	obesity	Projected
Austria	AUT	Men	2035	std84	0.135645	0.142448	0.1498	obesity	Projected
Austria	AUT	Men	2036	std84	0.13567	0.143034	0.151026	obesity	Projected
Austria	AUT	Men	2037	std84	0.135546	0.143487	0.152141	obesity	Projected
Austria	AUT	Men	2038	std84	0.135269	0.143787	0.153106	obesity	Projected
Austria	AUT	Men	2039	std84	0.134842	0.143947	0.153936	obesity	Projected
Austria	AUT	Men	2040	std84	0.13429	0.143954	0.1546	obesity	Projected
Austria	AUT	Men	2041	std84	0.133604	0.1438	0.155115	obesity	Projected
Austria	AUT	Men	2042	std84	0.132761	0.143515	0.155496	obesity	Projected
Austria	AUT	Men	2043	std84	0.131787	0.143078	0.155723	obesity	Projected
Austria	AUT	Men	2044	std84	0.130704	0.142489	0.155764	obesity	Projected
Austria	AUT	Men	2045	std84	0.129482	0.14176	0.155732	obesity	Projected
Austria	AUT	Men	2046	std84	0.128144	0.140886	0.155517	obesity	Projected
Austria	AUT	Men	2047	std84	0.126654	0.139869	0.155152	obesity	Projected
Austria	AUT	Men	2048	std84	0.125037	0.138739	0.154635	obesity	Projected
Austria	AUT	Men	2049	std84	0.123307	0.137487	0.153992	obesity	Projected
Austria	AUT	Men	2050	std84	0.121529	0.136081	0.153168	obesity	Projected
Austria	AUT	Men	2051	std84	0.119657	0.134561	0.152176	obesity	Projected
Austria	AUT	Men	2052	std84	0.117702	0.132942	0.151125	obesity	Projected
Austria	AUT	Men	2053	std84	0.115664	0.131211	0.149835	obesity	Projected
Austria	AUT	Men	2054	std84	0.113568	0.129364	0.148444	obesity	Projected
Austria	AUT	Men	2055	std84	0.111422	0.127429	0.147003	obesity	Projected
Austria	AUT	Men	2056	std84	0.109218	0.125419	0.145367	obesity	Projected
Austria	AUT	Men	2057	std84	0.106978	0.123333	0.143608	obesity	Projected
Austria	AUT	Men	2058	std84	0.104685	0.121176	0.141788	obesity	Projected
Austria	AUT	Men	2059	std84	0.102419	0.118949	0.139749	obesity	Projected
Austria	AUT	Men	2060	std84	0.100103	0.116667	0.137673	obesity	Projected
Austria	AUT	Men	2061	std84	0.0977772	0.114335	0.135515	obesity	Projected
Austria	AUT	Men	2062	std84	0.0954878	0.111972	0.133329	obesity	Projected
Austria	AUT	Men	2063	std84	0.093188	0.109579	0.131044	obesity	Projected
Austria	AUT	Men	2064	std84	0.0909052	0.10716	0.128657	obesity	Projected
Austria	AUT	Men	2065	std84	0.0886335	0.104718	0.12621	obesity	Projected
Austria		Men	1990	std84		0.415282		lifestyle (combined)	Observed
Austria		Men	1991	std84		0.419219		lifestyle (combined)	Observed
Austria		Men	1992	std84		0.410858		lifestyle (combined)	Observed
Austria		Men	1993	std84		0.420018		lifestyle (combined)	Observed
Austria		Men	1994	std84		0.407929		lifestyle (combined)	Observed
Austria		Men	1995	std84		0.404842		lifestyle (combined)	Observed
Austria		Men	1996	std84		0.405522		lifestyle (combined)	Observed
Austria		Men	1997	std84		0.401134		lifestyle (combined)	Observed
Austria		Men	1998	std84		0.400978		lifestyle (combined)	Observed
Austria		Men	1999	std84		0.389639		lifestyle (combined)	Observed
Austria		Men	2000	std84		0.388389		lifestyle (combined)	Observed
Austria		Men	2001	std84		0.383559		lifestyle (combined)	Observed
Austria		Men	2002	std84		0.389312		lifestyle (combined)	Observed
Austria		Men	2003	std84		0.383304		lifestyle (combined)	Observed
Austria		Men	2004	std84		0.382984		lifestyle (combined)	Observed
Austria		Men	2005	std84		0.381391		lifestyle (combined)	Observed
Austria		Men	2006	std84		0.384117		lifestyle (combined)	Observed
Austria		Men	2007	std84		0.37193		lifestyle (combined)	Observed
Austria		Men	2008	std84		0.377888		lifestyle (combined)	Observed
Austria		Men	2009	std84		0.378018		lifestyle (combined)	Observed
Austria		Men	2010	std84		0.375014		lifestyle (combined)	Observed
Austria		Men	2011	std84		0.371607		lifestyle (combined)	Observed
Austria		Men	2012	std84		0.369338		lifestyle (combined)	Observed
Austria		Men	2013	std84		0.3731		lifestyle (combined)	Observed
Austria		Men	2014	std84		0.371273		lifestyle (combined)	Observed
Austria		Men	2015	std84		0.366482		lifestyle (combined)	Projected
Austria		Men	2016	std84		0.36457		lifestyle (combined)	Projected
Austria		Men	2017	std84		0.362764		lifestyle (combined)	Projected
Austria		Men	2018	std84		0.360749		lifestyle (combined)	Projected
Austria		Men	2019	std84		0.358685		lifestyle (combined)	Projected
Austria		Men	2020	std84		0.356593		lifestyle (combined)	Projected
Austria		Men	2021	std84		0.354443		lifestyle (combined)	Projected
Austria		Men	2022	std84		0.352294		lifestyle (combined)	Projected
Austria		Men	2023	std84		0.350205		lifestyle (combined)	Projected
Austria		Men	2024	std84		0.348089		lifestyle (combined)	Projected
Austria		Men	2025	std84		0.345985		lifestyle (combined)	Projected
Austria		Men	2026	std84		0.343829		lifestyle (combined)	Projected
Austria		Men	2027	std84		0.341731		lifestyle (combined)	Projected
Austria		Men	2028	std84		0.339545		lifestyle (combined)	Projected
Austria		Men	2029	std84		0.337431		lifestyle (combined)	Projected
Austria		Men	2030	std84		0.335386		lifestyle (combined)	Projected
Austria		Men	2031	std84		0.333341		lifestyle (combined)	Projected
Austria		Men	2032	std84		0.331327		lifestyle (combined)	Projected
Austria		Men	2033	std84		0.329269		lifestyle (combined)	Projected
Austria		Men	2034	std84		0.327235		lifestyle (combined)	Projected
Austria		Men	2035	std84		0.325152		lifestyle (combined)	Projected
Austria		Men	2036	std84		0.322918		lifestyle (combined)	Projected
Austria		Men	2037	std84		0.320902		lifestyle (combined)	Projected
Austria		Men	2038	std84		0.318764		lifestyle (combined)	Projected
Austria		Men	2039	std84		0.316745		lifestyle (combined)	Projected
Austria		Men	2040	std84		0.314639		lifestyle (combined)	Projected
Austria		Men	2041	std84		0.312536		lifestyle (combined)	Projected
Austria		Men	2042	std84		0.310353		lifestyle (combined)	Projected
Austria		Men	2043	std84		0.308185		lifestyle (combined)	Projected
Austria		Men	2044	std84		0.305907		lifestyle (combined)	Projected
Austria		Men	2045	std84		0.303658		lifestyle (combined)	Projected
Austria		Men	2046	std84		0.30134		lifestyle (combined)	Projected
Austria		Men	2047	std84		0.299006		lifestyle (combined)	Projected
Austria		Men	2048	std84		0.296679		lifestyle (combined)	Projected
Austria		Men	2049	std84		0.294312		lifestyle (combined)	Projected
Austria		Men	2050	std84		0.291831		lifestyle (combined)	Projected
Austria		Men	2051	std84		0.289389		lifestyle (combined)	Projected
Austria		Men	2052	std84		0.286974		lifestyle (combined)	Projected
Austria		Men	2053	std84		0.284505		lifestyle (combined)	Projected
Austria		Men	2054	std84		0.281907		lifestyle (combined)	Projected
Austria		Men	2055	std84		0.279372		lifestyle (combined)	Projected
Austria		Men	2056	std84		0.276723		lifestyle (combined)	Projected
Austria		Men	2057	std84		0.274104		lifestyle (combined)	Projected
Austria		Men	2058	std84		0.271452		lifestyle (combined)	Projected
Austria		Men	2059	std84		0.268771		lifestyle (combined)	Projected
Austria		Men	2060	std84		0.266083		lifestyle (combined)	Projected
Austria		Men	2061	std84		0.263359		lifestyle (combined)	Projected
Austria		Men	2062	std84		0.260614		lifestyle (combined)	Projected
Austria		Men	2063	std84		0.257881		lifestyle (combined)	Projected
Austria		Men	2064	std84		0.255165		lifestyle (combined)	Projected
Austria		Men	2065	std84		0.252364		lifestyle (combined)	Projected
Belgium	BEL	Men	1990	std84		0.398406		smoking	Observed
Belgium	BEL	Men	1991	std84		0.395396		smoking	Observed
Belgium	BEL	Men	1992	std84		0.395342		smoking	Observed
Belgium	BEL	Men	1993	std84		0.397172		smoking	Observed
Belgium	BEL	Men	1994	std84		0.387699		smoking	Observed
Belgium	BEL	Men	1995	std84		0.392326		smoking	Observed
Belgium	BEL	Men	1996	std84		0.376986		smoking	Observed
Belgium	BEL	Men	1997	std84		0.380089		smoking	Observed
Belgium	BEL	Men	1998	std84		0.360538		smoking	Observed
Belgium	BEL	Men	1999	std84		0.34696		smoking	Observed
Belgium	BEL	Men	2000	std84		0.341725		smoking	Observed
Belgium	BEL	Men	2001	std84		0.34539		smoking	Observed
Belgium	BEL	Men	2002	std84		0.335078		smoking	Observed
Belgium	BEL	Men	2003	std84		0.325384		smoking	Observed
Belgium	BEL	Men	2004	std84		0.31384		smoking	Observed
Belgium	BEL	Men	2005	std84		0.320063		smoking	Observed
Belgium	BEL	Men	2006	std84		0.315442		smoking	Observed
Belgium	BEL	Men	2007	std84		0.304282		smoking	Observed
Belgium	BEL	Men	2008	std84		0.305937		smoking	Observed
Belgium	BEL	Men	2009	std84		0.296861		smoking	Observed
Belgium	BEL	Men	2010	std84		0.298775		smoking	Observed
Belgium	BEL	Men	2011	std84		0.283838		smoking	Observed
Belgium	BEL	Men	2012	std84		0.271062		smoking	Observed
Belgium	BEL	Men	2013	std84		0.262639		smoking	Observed
Belgium	BEL	Men	2014	std84		0.260719		smoking	Observed
Belgium	BEL	Men	2015	std84		0.247063		smoking	Observed
Belgium	BEL	Men	2016	std84	0.197976	0.222578	0.24848	smoking	Projected
Belgium	BEL	Men	2017	std84	0.191193	0.217275	0.245363	smoking	Projected
Belgium	BEL	Men	2018	std84	0.178067	0.208889	0.242665	smoking	Projected
Belgium	BEL	Men	2019	std84	0.170245	0.202538	0.238674	smoking	Projected
Belgium	BEL	Men	2020	std84	0.160907	0.19546	0.234551	smoking	Projected
Belgium	BEL	Men	2021	std84	0.153849	0.189114	0.230434	smoking	Projected
Belgium	BEL	Men	2022	std84	0.146254	0.182539	0.22609	smoking	Projected
Belgium	BEL	Men	2023	std84	0.139724	0.176592	0.221223	smoking	Projected
Belgium	BEL	Men	2024	std84	0.13359	0.170486	0.216712	smoking	Projected
Belgium	BEL	Men	2025	std84	0.127955	0.164825	0.212627	smoking	Projected
Belgium	BEL	Men	2026	std84	0.122648	0.159348	0.207938	smoking	Projected
Belgium	BEL	Men	2027	std84	0.117747	0.154161	0.203698	smoking	Projected
Belgium	BEL	Men	2028	std84	0.11294	0.148906	0.19922	smoking	Projected
Belgium	BEL	Men	2029	std84	0.108907	0.144179	0.194211	smoking	Projected
Belgium	BEL	Men	2030	std84	0.104853	0.13936	0.189473	smoking	Projected
Belgium	BEL	Men	2031	std84	0.101499	0.134959	0.184855	smoking	Projected
Belgium	BEL	Men	2032	std84	0.0980448	0.13043	0.180497	smoking	Projected
Belgium	BEL	Men	2033	std84	0.0949794	0.126409	0.176379	smoking	Projected
Belgium	BEL	Men	2034	std84	0.0920765	0.12225	0.172255	smoking	Projected
Belgium	BEL	Men	2035	std84	0.0895448	0.118577	0.168041	smoking	Projected
Belgium	BEL	Men	2036	std84	0.0869483	0.114943	0.164218	smoking	Projected
Belgium	BEL	Men	2037	std84	0.0848581	0.11138	0.159649	smoking	Projected
Belgium	BEL	Men	2038	std84	0.0827145	0.108205	0.155259	smoking	Projected
Belgium	BEL	Men	2039	std84	0.080988	0.105157	0.151184	smoking	Projected
Belgium	BEL	Men	2040	std84	0.0791864	0.102232	0.147104	smoking	Projected
Belgium	BEL	Men	2041	std84	0.0776557	0.0995373	0.143197	smoking	Projected
Belgium	BEL	Men	2042	std84	0.0761966	0.096941	0.139316	smoking	Projected
Belgium	BEL	Men	2043	std84	0.0749406	0.0945352	0.135632	smoking	Projected
Belgium	BEL	Men	2044	std84	0.0737961	0.0921825	0.13232	smoking	Projected
Belgium	BEL	Men	2045	std84	0.0726977	0.0900726	0.128512	smoking	Projected
Belgium	BEL	Men	2046	std84	0.0716871	0.0880484	0.125089	smoking	Projected
Belgium	BEL	Men	2047	std84	0.0707474	0.0861002	0.121969	smoking	Projected
Belgium	BEL	Men	2048	std84	0.0699	0.0842433	0.118786	smoking	Projected
Belgium	BEL	Men	2049	std84	0.0691463	0.0825568	0.115695	smoking	Projected
Belgium	BEL	Men	2050	std84	0.0684699	0.081001	0.112479	smoking	Projected
Belgium	BEL	Men	2051	std84	0.0678105	0.0795008	0.109573	smoking	Projected
Belgium	BEL	Men	2052	std84	0.0672309	0.0781452	0.106828	smoking	Projected
Belgium	BEL	Men	2053	std84	0.0666694	0.0768765	0.104256	smoking	Projected
Belgium	BEL	Men	2054	std84	0.0661711	0.0757372	0.101646	smoking	Projected
Belgium	BEL	Men	2055	std84	0.0657584	0.0746153	0.0992815	smoking	Projected
Belgium	BEL	Men	2056	std84	0.0653174	0.0735864	0.0972238	smoking	Projected
Belgium	BEL	Men	2057	std84	0.0650045	0.0726652	0.0949478	smoking	Projected
Belgium	BEL	Men	2058	std84	0.0646473	0.0717704	0.0928675	smoking	Projected
Belgium	BEL	Men	2059	std84	0.0643791	0.0709735	0.0909495	smoking	Projected
Belgium	BEL	Men	2060	std84	0.0640906	0.070276	0.0892288	smoking	Projected
Belgium	BEL	Men	2061	std84	0.0638683	0.0695906	0.0875296	smoking	Projected
Belgium	BEL	Men	2062	std84	0.0636337	0.068941	0.0858548	smoking	Projected
Belgium	BEL	Men	2063	std84	0.0634306	0.0683463	0.0844019	smoking	Projected
Belgium	BEL	Men	2064	std84	0.0632437	0.0678202	0.0830693	smoking	Projected
Belgium	BEL	Men	2065	std84	0.06307	0.0673186	0.0817031	smoking	Projected
Belgium	BEL	Men	1990	std84		0.0554869		alcohol	Observed
Belgium	BEL	Men	1991	std84		0.0560418		alcohol	Observed
Belgium	BEL	Men	1992	std84		0.0561618		alcohol	Observed
Belgium	BEL	Men	1993	std84		0.0562466		alcohol	Observed
Belgium	BEL	Men	1994	std84		0.0569741		alcohol	Observed
Belgium	BEL	Men	1995	std84		0.0562035		alcohol	Observed
Belgium	BEL	Men	1996	std84		0.0560053		alcohol	Observed
Belgium	BEL	Men	1997	std84		0.0559463		alcohol	Observed
Belgium	BEL	Men	1998	std84		0.0548026		alcohol	Observed
Belgium	BEL	Men	1999	std84		0.0546672		alcohol	Observed
Belgium	BEL	Men	2000	std84		0.0559311		alcohol	Observed
Belgium	BEL	Men	2001	std84		0.0587596		alcohol	Observed
Belgium	BEL	Men	2002	std84		0.0630389		alcohol	Observed
Belgium	BEL	Men	2003	std84		0.0677035		alcohol	Observed
Belgium	BEL	Men	2004	std84		0.0735728		alcohol	Observed
Belgium	BEL	Men	2005	std84		0.0772425		alcohol	Observed
Belgium	BEL	Men	2006	std84		0.0783827		alcohol	Observed
Belgium	BEL	Men	2007	std84		0.0813442		alcohol	Observed
Belgium	BEL	Men	2008	std84		0.0827802		alcohol	Observed
Belgium	BEL	Men	2009	std84		0.0846482		alcohol	Observed
Belgium	BEL	Men	2010	std84		0.0852614		alcohol	Observed
Belgium	BEL	Men	2011	std84		0.087776		alcohol	Observed
Belgium	BEL	Men	2012	std84		0.0880607		alcohol	Observed
Belgium	BEL	Men	2013	std84		0.0875942		alcohol	Observed
Belgium	BEL	Men	2014	std84		0.0893276		alcohol	Observed
Belgium	BEL	Men	2015	std84		0.0887615		alcohol	Observed
Belgium	BEL	Men	2016	std84	0.0846696	0.0871228	0.0896312	alcohol	Projected
Belgium	BEL	Men	2017	std84	0.081042	0.0852632	0.0896759	alcohol	Projected
Belgium	BEL	Men	2018	std84	0.0776768	0.0829454	0.0885457	alcohol	Projected
Belgium	BEL	Men	2019	std84	0.0742549	0.0802271	0.0866962	alcohol	Projected
Belgium	BEL	Men	2020	std84	0.0707052	0.077185	0.084233	alcohol	Projected
Belgium	BEL	Men	2021	std84	0.0670746	0.0738099	0.0813567	alcohol	Projected
Belgium	BEL	Men	2022	std84	0.0633525	0.0702384	0.0780122	alcohol	Projected
Belgium	BEL	Men	2023	std84	0.0596783	0.0665271	0.0743175	alcohol	Projected
Belgium	BEL	Men	2024	std84	0.0560448	0.062719	0.0704663	alcohol	Projected
Belgium	BEL	Men	2025	std84	0.052455	0.0588687	0.0664415	alcohol	Projected
Belgium	BEL	Men	2026	std84	0.0489873	0.0550877	0.0624041	alcohol	Projected
Belgium	BEL	Men	2027	std84	0.0456603	0.0513907	0.0583268	alcohol	Projected
Belgium	BEL	Men	2028	std84	0.0425603	0.0478468	0.0543659	alcohol	Projected
Belgium	BEL	Men	2029	std84	0.0396439	0.0444824	0.0504844	alcohol	Projected
Belgium	BEL	Men	2030	std84	0.0369752	0.0413575	0.0468036	alcohol	Projected
Belgium	BEL	Men	2031	std84	0.0345359	0.0384513	0.0433506	alcohol	Projected
Belgium	BEL	Men	2032	std84	0.0323575	0.0358175	0.0401931	alcohol	Projected
Belgium	BEL	Men	2033	std84	0.0304316	0.0334441	0.0373347	alcohol	Projected
Belgium	BEL	Men	2034	std84	0.0287246	0.0313321	0.0347576	alcohol	Projected
Belgium	BEL	Men	2035	std84	0.027238	0.0294728	0.0324431	alcohol	Projected
Belgium	BEL	Men	2036	std84	0.0259532	0.027858	0.0303718	alcohol	Projected
Belgium	BEL	Men	2037	std84	0.0248597	0.0264664	0.0286046	alcohol	Projected
Belgium	BEL	Men	2038	std84	0.0239366	0.0252763	0.0270773	alcohol	Projected
Belgium	BEL	Men	2039	std84	0.0231717	0.0242713	0.0257617	alcohol	Projected
Belgium	BEL	Men	2040	std84	0.0225279	0.0234322	0.0246718	alcohol	Projected
Belgium	BEL	Men	2041	std84	0.0220012	0.0227349	0.0237545	alcohol	Projected
Belgium	BEL	Men	2042	std84	0.021572	0.0221649	0.0229892	alcohol	Projected
Belgium	BEL	Men	2043	std84	0.0212279	0.0216998	0.0223627	alcohol	Projected
Belgium	BEL	Men	2044	std84	0.0209503	0.0213256	0.0218529	alcohol	Projected
Belgium	BEL	Men	2045	std84	0.02073	0.0210258	0.0214428	alcohol	Projected
Belgium	BEL	Men	2046	std84	0.0205577	0.0207882	0.0211146	alcohol	Projected
Belgium	BEL	Men	2047	std84	0.0204232	0.0206012	0.0208551	alcohol	Projected
Belgium	BEL	Men	2048	std84	0.0203186	0.0204554	0.0206515	alcohol	Projected
Belgium	BEL	Men	2049	std84	0.0202383	0.0203425	0.0204924	alcohol	Projected
Belgium	BEL	Men	2050	std84	0.0201767	0.0202559	0.0203705	alcohol	Projected
Belgium	BEL	Men	2051	std84	0.0201304	0.0201899	0.0202771	alcohol	Projected
Belgium	BEL	Men	2052	std84	0.0200954	0.0201398	0.0202046	alcohol	Projected
Belgium	BEL	Men	2053	std84	0.0200692	0.0201021	0.0201502	alcohol	Projected
Belgium	BEL	Men	2054	std84	0.0200499	0.0200741	0.0201097	alcohol	Projected
Belgium	BEL	Men	2055	std84	0.0200358	0.0200533	0.0200795	alcohol	Projected
Belgium	BEL	Men	2056	std84	0.0200254	0.0200381	0.0200571	alcohol	Projected
Belgium	BEL	Men	2057	std84	0.0200179	0.0200271	0.0200407	alcohol	Projected
Belgium	BEL	Men	2058	std84	0.0200126	0.0200191	0.0200288	alcohol	Projected
Belgium	BEL	Men	2059	std84	0.0200088	0.0200133	0.0200203	alcohol	Projected
Belgium	BEL	Men	2060	std84	0.020006	0.0200092	0.0200141	alcohol	Projected
Belgium	BEL	Men	2061	std84	0.0200041	0.0200064	0.0200098	alcohol	Projected
Belgium	BEL	Men	2062	std84	0.0200028	0.0200044	0.0200067	alcohol	Projected
Belgium	BEL	Men	2063	std84	0.0200019	0.020003	0.0200046	alcohol	Projected
Belgium	BEL	Men	2064	std84	0.0200013	0.020002	0.0200031	alcohol	Projected
Belgium	BEL	Men	2065	std84	0.0200008	0.0200013	0.0200021	alcohol	Projected
Belgium	BEL	Men	1990	std84		0.070637		obesity	Observed
Belgium	BEL	Men	1991	std84		0.0723835		obesity	Observed
Belgium	BEL	Men	1992	std84		0.0741551		obesity	Observed
Belgium	BEL	Men	1993	std84		0.0759552		obesity	Observed
Belgium	BEL	Men	1994	std84		0.0777823		obesity	Observed
Belgium	BEL	Men	1995	std84		0.0796336		obesity	Observed
Belgium	BEL	Men	1996	std84		0.0815003		obesity	Observed
Belgium	BEL	Men	1997	std84		0.0833757		obesity	Observed
Belgium	BEL	Men	1998	std84		0.0852632		obesity	Observed
Belgium	BEL	Men	1999	std84		0.0871601		obesity	Observed
Belgium	BEL	Men	2000	std84		0.0890568		obesity	Observed
Belgium	BEL	Men	2001	std84		0.0909534		obesity	Observed
Belgium	BEL	Men	2002	std84		0.0928516		obesity	Observed
Belgium	BEL	Men	2003	std84		0.0947563		obesity	Observed
Belgium	BEL	Men	2004	std84		0.0966654		obesity	Observed
Belgium	BEL	Men	2005	std84		0.0985787		obesity	Observed
Belgium	BEL	Men	2006	std84		0.100489		obesity	Observed
Belgium	BEL	Men	2007	std84		0.102397		obesity	Observed
Belgium	BEL	Men	2008	std84		0.104307		obesity	Observed
Belgium	BEL	Men	2009	std84		0.106217		obesity	Observed
Belgium	BEL	Men	2010	std84		0.108143		obesity	Observed
Belgium	BEL	Men	2011	std84		0.110074		obesity	Observed
Belgium	BEL	Men	2012	std84		0.112018		obesity	Observed
Belgium	BEL	Men	2013	std84		0.113983		obesity	Observed
Belgium	BEL	Men	2014	std84		0.11597		obesity	Observed
Belgium	BEL	Men	2015	std84		0.117985		obesity	Observed
Belgium	BEL	Men	2016	std84		0.120027		obesity	Observed
Belgium	BEL	Men	2017	std84	0.122357	0.12244	0.122522	obesity	Projected
Belgium	BEL	Men	2018	std84	0.124292	0.124481	0.124671	obesity	Projected
Belgium	BEL	Men	2019	std84	0.126157	0.126484	0.12681	obesity	Projected
Belgium	BEL	Men	2020	std84	0.127952	0.128442	0.128934	obesity	Projected
Belgium	BEL	Men	2021	std84	0.129672	0.130348	0.131034	obesity	Projected
Belgium	BEL	Men	2022	std84	0.131312	0.132198	0.1331	obesity	Projected
Belgium	BEL	Men	2023	std84	0.132859	0.133982	0.135126	obesity	Projected
Belgium	BEL	Men	2024	std84	0.134321	0.1357	0.13711	obesity	Projected
Belgium	BEL	Men	2025	std84	0.13568	0.137339	0.139034	obesity	Projected
Belgium	BEL	Men	2026	std84	0.136931	0.138897	0.140901	obesity	Projected
Belgium	BEL	Men	2027	std84	0.13808	0.140369	0.142703	obesity	Projected
Belgium	BEL	Men	2028	std84	0.13912	0.14175	0.144431	obesity	Projected
Belgium	BEL	Men	2029	std84	0.140062	0.143034	0.146082	obesity	Projected
Belgium	BEL	Men	2030	std84	0.14087	0.144219	0.147654	obesity	Projected
Belgium	BEL	Men	2031	std84	0.141561	0.145295	0.149136	obesity	Projected
Belgium	BEL	Men	2032	std84	0.142122	0.14626	0.150519	obesity	Projected
Belgium	BEL	Men	2033	std84	0.142562	0.147119	0.151816	obesity	Projected
Belgium	BEL	Men	2034	std84	0.142895	0.147856	0.153001	obesity	Projected
Belgium	BEL	Men	2035	std84	0.143094	0.148477	0.154082	obesity	Projected
Belgium	BEL	Men	2036	std84	0.143146	0.148982	0.155067	obesity	Projected
Belgium	BEL	Men	2037	std84	0.143095	0.149363	0.155943	obesity	Projected
Belgium	BEL	Men	2038	std84	0.142921	0.14963	0.15669	obesity	Projected
Belgium	BEL	Men	2039	std84	0.142601	0.149771	0.157328	obesity	Projected
Belgium	BEL	Men	2040	std84	0.142192	0.149783	0.157834	obesity	Projected
Belgium	BEL	Men	2041	std84	0.141655	0.149669	0.158251	obesity	Projected
Belgium	BEL	Men	2042	std84	0.14098	0.149438	0.158533	obesity	Projected
Belgium	BEL	Men	2043	std84	0.140196	0.149084	0.158696	obesity	Projected
Belgium	BEL	Men	2044	std84	0.13929	0.148611	0.15873	obesity	Projected
Belgium	BEL	Men	2045	std84	0.138269	0.147999	0.158641	obesity	Projected
Belgium	BEL	Men	2046	std84	0.13716	0.147276	0.158406	obesity	Projected
Belgium	BEL	Men	2047	std84	0.135948	0.146441	0.15806	obesity	Projected
Belgium	BEL	Men	2048	std84	0.134648	0.1455	0.157602	obesity	Projected
Belgium	BEL	Men	2049	std84	0.133214	0.144439	0.157018	obesity	Projected
Belgium	BEL	Men	2050	std84	0.131718	0.143269	0.156333	obesity	Projected
Belgium	BEL	Men	2051	std84	0.13014	0.142	0.155509	obesity	Projected
Belgium	BEL	Men	2052	std84	0.12848	0.140642	0.154582	obesity	Projected
Belgium	BEL	Men	2053	std84	0.126765	0.139191	0.153538	obesity	Projected
Belgium	BEL	Men	2054	std84	0.124972	0.137653	0.152362	obesity	Projected
Belgium	BEL	Men	2055	std84	0.123125	0.136031	0.15112	obesity	Projected
Belgium	BEL	Men	2056	std84	0.121234	0.134322	0.149769	obesity	Projected
Belgium	BEL	Men	2057	std84	0.11931	0.132547	0.148285	obesity	Projected
Belgium	BEL	Men	2058	std84	0.117349	0.130697	0.146706	obesity	Projected
Belgium	BEL	Men	2059	std84	0.115334	0.128801	0.145062	obesity	Projected
Belgium	BEL	Men	2060	std84	0.113335	0.126856	0.143337	obesity	Projected
Belgium	BEL	Men	2061	std84	0.111299	0.124862	0.141531	obesity	Projected
Belgium	BEL	Men	2062	std84	0.109275	0.122824	0.139638	obesity	Projected
Belgium	BEL	Men	2063	std84	0.107216	0.120749	0.13766	obesity	Projected
Belgium	BEL	Men	2064	std84	0.105181	0.118657	0.135681	obesity	Projected
Belgium	BEL	Men	2065	std84	0.103146	0.116542	0.133655	obesity	Projected
Belgium		Men	1990	std84		0.471924		lifestyle (combined)	Observed
Belgium		Men	1991	std84		0.47059		lifestyle (combined)	Observed
Belgium		Men	1992	std84		0.471621		lifestyle (combined)	Observed
Belgium		Men	1993	std84		0.474291		lifestyle (combined)	Observed
Belgium		Men	1994	std84		0.467497		lifestyle (combined)	Observed
Belgium		Men	1995	std84		0.472151		lifestyle (combined)	Observed
Belgium		Men	1996	std84		0.45981		lifestyle (combined)	Observed
Belgium		Men	1997	std84		0.463564		lifestyle (combined)	Observed
Belgium		Men	1998	std84		0.447117		lifestyle (combined)	Observed
Belgium		Men	1999	std84		0.436467		lifestyle (combined)	Observed
Belgium		Men	2000	std84		0.433888		lifestyle (combined)	Observed
Belgium		Men	2001	std84		0.439895		lifestyle (combined)	Observed
Belgium		Men	2002	std84		0.434841		lifestyle (combined)	Observed
Belgium		Men	2003	std84		0.430654		lifestyle (combined)	Observed
Belgium		Men	2004	std84		0.425771		lifestyle (combined)	Observed
Belgium		Men	2005	std84		0.434433		lifestyle (combined)	Observed
Belgium		Men	2006	std84		0.432498		lifestyle (combined)	Observed
Belgium		Men	2007	std84		0.426319		lifestyle (combined)	Observed
Belgium		Men	2008	std84		0.429794		lifestyle (combined)	Observed
Belgium		Men	2009	std84		0.424744		lifestyle (combined)	Observed
Belgium		Men	2010	std84		0.427929		lifestyle (combined)	Observed
Belgium		Men	2011	std84		0.418612		lifestyle (combined)	Observed
Belgium		Men	2012	std84		0.409716		lifestyle (combined)	Observed
Belgium		Men	2013	std84		0.403912		lifestyle (combined)	Observed
Belgium		Men	2014	std84		0.404833		lifestyle (combined)	Observed
Belgium		Men	2015	std84		0.394845		lifestyle (combined)	Observed
Belgium		Men	2015	std84		0.394845		lifestyle (combined)	Projected
Belgium		Men	2016	std84		0.375491		lifestyle (combined)	Projected
Belgium		Men	2017	std84		0.371678		lifestyle (combined)	Projected
Belgium		Men	2018	std84		0.364818		lifestyle (combined)	Projected
Belgium		Men	2019	std84		0.35929		lifestyle (combined)	Projected
Belgium		Men	2020	std84		0.352919		lifestyle (combined)	Projected
Belgium		Men	2021	std84		0.346862		lifestyle (combined)	Projected
Belgium		Men	2022	std84		0.340432		lifestyle (combined)	Projected
Belgium		Men	2023	std84		0.334354		lifestyle (combined)	Projected
Belgium		Men	2024	std84		0.328017		lifestyle (combined)	Projected
Belgium		Men	2025	std84		0.32194		lifestyle (combined)	Projected
Belgium		Men	2026	std84		0.315989		lifestyle (combined)	Projected
Belgium		Men	2027	std84		0.310257		lifestyle (combined)	Projected
Belgium		Men	2028	std84		0.304498		lifestyle (combined)	Projected
Belgium		Men	2029	std84		0.299214		lifestyle (combined)	Projected
Belgium		Men	2030	std84		0.293942		lifestyle (combined)	Projected
Belgium		Men	2031	std84		0.289074		lifestyle (combined)	Projected
Belgium		Men	2032	std84		0.284204		lifestyle (combined)	Projected
Belgium		Men	2033	std84		0.279849		lifestyle (combined)	Projected
Belgium		Men	2034	std84		0.275466		lifestyle (combined)	Projected
Belgium		Men	2035	std84		0.271569		lifestyle (combined)	Projected
Belgium		Men	2036	std84		0.267784		lifestyle (combined)	Projected
Belgium		Men	2037	std84		0.264113		lifestyle (combined)	Projected
Belgium		Men	2038	std84		0.260813		lifestyle (combined)	Projected
Belgium		Men	2039	std84		0.257645		lifestyle (combined)	Projected
Belgium		Men	2040	std84		0.254588		lifestyle (combined)	Projected
Belgium		Men	2041	std84		0.251717		lifestyle (combined)	Projected
Belgium		Men	2042	std84		0.248918		lifestyle (combined)	Projected
Belgium		Men	2043	std84		0.246244		lifestyle (combined)	Projected
Belgium		Men	2044	std84		0.243577		lifestyle (combined)	Projected
Belgium		Men	2045	std84		0.241041		lifestyle (combined)	Projected
Belgium		Men	2046	std84		0.238523		lifestyle (combined)	Projected
Belgium		Men	2047	std84		0.236003		lifestyle (combined)	Projected
Belgium		Men	2048	std84		0.233493		lifestyle (combined)	Projected
Belgium		Men	2049	std84		0.231039		lifestyle (combined)	Projected
Belgium		Men	2050	std84		0.228613		lifestyle (combined)	Projected
Belgium		Men	2051	std84		0.226158		lifestyle (combined)	Projected
Belgium		Men	2052	std84		0.223752		lifestyle (combined)	Projected
Belgium		Men	2053	std84		0.221341		lifestyle (combined)	Projected
Belgium		Men	2054	std84		0.218964		lifestyle (combined)	Projected
Belgium		Men	2055	std84		0.216529		lifestyle (combined)	Projected
Belgium		Men	2056	std84		0.214095		lifestyle (combined)	Projected
Belgium		Men	2057	std84		0.21169		lifestyle (combined)	Projected
Belgium		Men	2058	std84		0.209241		lifestyle (combined)	Projected
Belgium		Men	2059	std84		0.206831		lifestyle (combined)	Projected
Belgium		Men	2060	std84		0.20446		lifestyle (combined)	Projected
Belgium		Men	2061	std84		0.202053		lifestyle (combined)	Projected
Belgium		Men	2062	std84		0.199635		lifestyle (combined)	Projected
Belgium		Men	2063	std84		0.197228		lifestyle (combined)	Projected
Belgium		Men	2064	std84		0.194863		lifestyle (combined)	Projected
Belgium		Men	2065	std84		0.192496		lifestyle (combined)	Projected
Czech Republic	CZE	Men	1990	std84		0.408686		smoking	Observed
Czech Republic	CZE	Men	1991	std84		0.407673		smoking	Observed
Czech Republic	CZE	Men	1992	std84		0.405364		smoking	Observed
Czech Republic	CZE	Men	1993	std84		0.406176		smoking	Observed
Czech Republic	CZE	Men	1994	std84		0.389012		smoking	Observed
Czech Republic	CZE	Men	1995	std84		0.401983		smoking	Observed
Czech Republic	CZE	Men	1996	std84		0.388958		smoking	Observed
Czech Republic	CZE	Men	1997	std84		0.390309		smoking	Observed
Czech Republic	CZE	Men	1998	std84		0.378666		smoking	Observed
Czech Republic	CZE	Men	1999	std84		0.378754		smoking	Observed
Czech Republic	CZE	Men	2000	std84		0.381791		smoking	Observed
Czech Republic	CZE	Men	2001	std84		0.369926		smoking	Observed
Czech Republic	CZE	Men	2002	std84		0.365197		smoking	Observed
Czech Republic	CZE	Men	2003	std84		0.360517		smoking	Observed
Czech Republic	CZE	Men	2004	std84		0.358366		smoking	Observed
Czech Republic	CZE	Men	2005	std84		0.343782		smoking	Observed
Czech Republic	CZE	Men	2006	std84		0.336509		smoking	Observed
Czech Republic	CZE	Men	2007	std84		0.325281		smoking	Observed
Czech Republic	CZE	Men	2008	std84		0.310501		smoking	Observed
Czech Republic	CZE	Men	2009	std84		0.308362		smoking	Observed
Czech Republic	CZE	Men	2010	std84		0.308985		smoking	Observed
Czech Republic	CZE	Men	2011	std84		0.296602		smoking	Observed
Czech Republic	CZE	Men	2012	std84		0.284326		smoking	Observed
Czech Republic	CZE	Men	2013	std84		0.275335		smoking	Observed
Czech Republic	CZE	Men	2014	std84		0.260862		smoking	Observed
Czech Republic	CZE	Men	2015	std84		0.251536		smoking	Observed
Czech Republic	CZE	Men	2016	std84		0.247078		smoking	Observed
Czech Republic	CZE	Men	2017	std84	0.184416	0.206933	0.231522	smoking	Projected
Czech Republic	CZE	Men	2018	std84	0.172029	0.193788	0.217814	smoking	Projected
Czech Republic	CZE	Men	2019	std84	0.160654	0.181306	0.204453	smoking	Projected
Czech Republic	CZE	Men	2020	std84	0.15016	0.169869	0.191828	smoking	Projected
Czech Republic	CZE	Men	2021	std84	0.140853	0.159458	0.180667	smoking	Projected
Czech Republic	CZE	Men	2022	std84	0.132915	0.150012	0.169816	smoking	Projected
Czech Republic	CZE	Men	2023	std84	0.125446	0.141511	0.160365	smoking	Projected
Czech Republic	CZE	Men	2024	std84	0.119095	0.134018	0.151748	smoking	Projected
Czech Republic	CZE	Men	2025	std84	0.113451	0.127559	0.144182	smoking	Projected
Czech Republic	CZE	Men	2026	std84	0.108574	0.121687	0.137316	smoking	Projected
Czech Republic	CZE	Men	2027	std84	0.104392	0.116816	0.131815	smoking	Projected
Czech Republic	CZE	Men	2028	std84	0.100509	0.112413	0.126774	smoking	Projected
Czech Republic	CZE	Men	2029	std84	0.0972718	0.108641	0.122375	smoking	Projected
Czech Republic	CZE	Men	2030	std84	0.0944381	0.10538	0.118679	smoking	Projected
Czech Republic	CZE	Men	2031	std84	0.0915463	0.102145	0.115259	smoking	Projected
Czech Republic	CZE	Men	2032	std84	0.0891581	0.0995297	0.11256	smoking	Projected
Czech Republic	CZE	Men	2033	std84	0.0867143	0.0968689	0.109926	smoking	Projected
Czech Republic	CZE	Men	2034	std84	0.0844054	0.0944541	0.107492	smoking	Projected
Czech Republic	CZE	Men	2035	std84	0.0823958	0.0922309	0.10548	smoking	Projected
Czech Republic	CZE	Men	2036	std84	0.0803642	0.0900287	0.10321	smoking	Projected
Czech Republic	CZE	Men	2037	std84	0.0785104	0.0879587	0.101255	smoking	Projected
Czech Republic	CZE	Men	2038	std84	0.0766258	0.0858591	0.0992256	smoking	Projected
Czech Republic	CZE	Men	2039	std84	0.0748978	0.0838309	0.0973233	smoking	Projected
Czech Republic	CZE	Men	2040	std84	0.0733546	0.081915	0.0953879	smoking	Projected
Czech Republic	CZE	Men	2041	std84	0.0718933	0.080095	0.0933063	smoking	Projected
Czech Republic	CZE	Men	2042	std84	0.0705664	0.0783554	0.0911103	smoking	Projected
Czech Republic	CZE	Men	2043	std84	0.0693393	0.0767072	0.0892375	smoking	Projected
Czech Republic	CZE	Men	2044	std84	0.0682434	0.0751741	0.0871835	smoking	Projected
Czech Republic	CZE	Men	2045	std84	0.0672754	0.0737769	0.0854384	smoking	Projected
Czech Republic	CZE	Men	2046	std84	0.0663664	0.0724508	0.0836487	smoking	Projected
Czech Republic	CZE	Men	2047	std84	0.0656045	0.0712555	0.0818138	smoking	Projected
Czech Republic	CZE	Men	2048	std84	0.064889	0.0701318	0.0801571	smoking	Projected
Czech Republic	CZE	Men	2049	std84	0.0642572	0.0691009	0.0785988	smoking	Projected
Czech Republic	CZE	Men	2050	std84	0.0636957	0.0681946	0.0771131	smoking	Projected
Czech Republic	CZE	Men	2051	std84	0.0632022	0.0673481	0.0757411	smoking	Projected
Czech Republic	CZE	Men	2052	std84	0.0627735	0.0665601	0.0743527	smoking	Projected
Czech Republic	CZE	Men	2053	std84	0.0623789	0.0658645	0.0731282	smoking	Projected
Czech Republic	CZE	Men	2054	std84	0.0620165	0.0652155	0.0720398	smoking	Projected
Czech Republic	CZE	Men	2055	std84	0.0617155	0.0646403	0.0709506	smoking	Projected
Czech Republic	CZE	Men	2056	std84	0.061439	0.0641067	0.0700169	smoking	Projected
Czech Republic	CZE	Men	2057	std84	0.0611947	0.0636264	0.0690113	smoking	Projected
Czech Republic	CZE	Men	2058	std84	0.0609644	0.0631956	0.068203	smoking	Projected
Czech Republic	CZE	Men	2059	std84	0.0607806	0.0627994	0.0673825	smoking	Projected
Czech Republic	CZE	Men	2060	std84	0.0606042	0.0624402	0.0666573	smoking	Projected
Czech Republic	CZE	Men	2061	std84	0.0604523	0.0621141	0.0659943	smoking	Projected
Czech Republic	CZE	Men	2062	std84	0.0603158	0.0618201	0.0653417	smoking	Projected
Czech Republic	CZE	Men	2063	std84	0.0601884	0.061557	0.0648119	smoking	Projected
Czech Republic	CZE	Men	2064	std84	0.0600808	0.0613247	0.0642989	smoking	Projected
Czech Republic	CZE	Men	2065	std84	0.0599875	0.0611049	0.0638318	smoking	Projected
Czech Republic	CZE	Men	1990	std84		0.0957856		alcohol	Observed
Czech Republic	CZE	Men	1991	std84		0.095661		alcohol	Observed
Czech Republic	CZE	Men	1992	std84		0.095309		alcohol	Observed
Czech Republic	CZE	Men	1993	std84		0.0959461		alcohol	Observed
Czech Republic	CZE	Men	1994	std84		0.0970013		alcohol	Observed
Czech Republic	CZE	Men	1995	std84		0.0976103		alcohol	Observed
Czech Republic	CZE	Men	1996	std84		0.100199		alcohol	Observed
Czech Republic	CZE	Men	1997	std84		0.103511		alcohol	Observed
Czech Republic	CZE	Men	1998	std84		0.107435		alcohol	Observed
Czech Republic	CZE	Men	1999	std84		0.110397		alcohol	Observed
Czech Republic	CZE	Men	2000	std84		0.11212		alcohol	Observed
Czech Republic	CZE	Men	2001	std84		0.113303		alcohol	Observed
Czech Republic	CZE	Men	2002	std84		0.113455		alcohol	Observed
Czech Republic	CZE	Men	2003	std84		0.11439		alcohol	Observed
Czech Republic	CZE	Men	2004	std84		0.115638		alcohol	Observed
Czech Republic	CZE	Men	2005	std84		0.116145		alcohol	Observed
Czech Republic	CZE	Men	2006	std84		0.116629		alcohol	Observed
Czech Republic	CZE	Men	2007	std84		0.11691		alcohol	Observed
Czech Republic	CZE	Men	2008	std84		0.117212		alcohol	Observed
Czech Republic	CZE	Men	2009	std84		0.115983		alcohol	Observed
Czech Republic	CZE	Men	2010	std84		0.116267		alcohol	Observed
Czech Republic	CZE	Men	2011	std84		0.116342		alcohol	Observed
Czech Republic	CZE	Men	2012	std84		0.115493		alcohol	Observed
Czech Republic	CZE	Men	2013	std84		0.114171		alcohol	Observed
Czech Republic	CZE	Men	2014	std84		0.114125		alcohol	Observed
Czech Republic	CZE	Men	2015	std84		0.112303		alcohol	Observed
Czech Republic	CZE	Men	2016	std84		0.112604		alcohol	Observed
Czech Republic	CZE	Men	2017	std84	0.108776	0.111123	0.113541	alcohol	Projected
Czech Republic	CZE	Men	2018	std84	0.106795	0.110503	0.114291	alcohol	Projected
Czech Republic	CZE	Men	2019	std84	0.103483	0.108828	0.114394	alcohol	Projected
Czech Republic	CZE	Men	2020	std84	0.100417	0.107143	0.114297	alcohol	Projected
Czech Republic	CZE	Men	2021	std84	0.0968973	0.104922	0.113629	alcohol	Projected
Czech Republic	CZE	Men	2022	std84	0.0933861	0.102535	0.112663	alcohol	Projected
Czech Republic	CZE	Men	2023	std84	0.0896569	0.0998331	0.111309	alcohol	Projected
Czech Republic	CZE	Men	2024	std84	0.0859593	0.0969405	0.109478	alcohol	Projected
Czech Republic	CZE	Men	2025	std84	0.0822208	0.0938747	0.107343	alcohol	Projected
Czech Republic	CZE	Men	2026	std84	0.0785697	0.0906683	0.105016	alcohol	Projected
Czech Republic	CZE	Men	2027	std84	0.0748475	0.0873429	0.102291	alcohol	Projected
Czech Republic	CZE	Men	2028	std84	0.0712019	0.0839568	0.0995071	alcohol	Projected
Czech Republic	CZE	Men	2029	std84	0.0676886	0.0805153	0.0964992	alcohol	Projected
Czech Republic	CZE	Men	2030	std84	0.0642682	0.0770715	0.0933115	alcohol	Projected
Czech Republic	CZE	Men	2031	std84	0.0610429	0.0736761	0.0899074	alcohol	Projected
Czech Republic	CZE	Men	2032	std84	0.0578491	0.0702796	0.0864483	alcohol	Projected
Czech Republic	CZE	Men	2033	std84	0.0548255	0.0669238	0.0828515	alcohol	Projected
Czech Republic	CZE	Men	2034	std84	0.0519736	0.0636502	0.0793091	alcohol	Projected
Czech Republic	CZE	Men	2035	std84	0.0492588	0.0604561	0.0757135	alcohol	Projected
Czech Republic	CZE	Men	2036	std84	0.0466774	0.0573869	0.0721872	alcohol	Projected
Czech Republic	CZE	Men	2037	std84	0.0442392	0.0544293	0.0686077	alcohol	Projected
Czech Republic	CZE	Men	2038	std84	0.0419648	0.0515824	0.0652074	alcohol	Projected
Czech Republic	CZE	Men	2039	std84	0.0398783	0.0489097	0.0618445	alcohol	Projected
Czech Republic	CZE	Men	2040	std84	0.0379022	0.0463431	0.0586595	alcohol	Projected
Czech Republic	CZE	Men	2041	std84	0.0360801	0.0439412	0.0555896	alcohol	Projected
Czech Republic	CZE	Men	2042	std84	0.0343949	0.0416946	0.0525874	alcohol	Projected
Czech Republic	CZE	Men	2043	std84	0.0328461	0.0395829	0.0497768	alcohol	Projected
Czech Republic	CZE	Men	2044	std84	0.0314251	0.0376239	0.0471283	alcohol	Projected
Czech Republic	CZE	Men	2045	std84	0.0301433	0.0358207	0.0446385	alcohol	Projected
Czech Republic	CZE	Men	2046	std84	0.0289876	0.034154	0.0422703	alcohol	Projected
Czech Republic	CZE	Men	2047	std84	0.0279428	0.0326241	0.0400481	alcohol	Projected
Czech Republic	CZE	Men	2048	std84	0.0269914	0.0312262	0.0380155	alcohol	Projected
Czech Republic	CZE	Men	2049	std84	0.0261369	0.0299572	0.0361384	alcohol	Projected
Czech Republic	CZE	Men	2050	std84	0.0253746	0.028809	0.0344271	alcohol	Projected
Czech Republic	CZE	Men	2051	std84	0.0247056	0.0277757	0.0328502	alcohol	Projected
Czech Republic	CZE	Men	2052	std84	0.024103	0.0268424	0.0314072	alcohol	Projected
Czech Republic	CZE	Men	2053	std84	0.0235645	0.0260058	0.030116	alcohol	Projected
Czech Republic	CZE	Men	2054	std84	0.0230956	0.0252574	0.028946	alcohol	Projected
Czech Republic	CZE	Men	2055	std84	0.0226777	0.0245902	0.0278848	alcohol	Projected
Czech Republic	CZE	Men	2056	std84	0.0223139	0.023998	0.026935	alcohol	Projected
Czech Republic	CZE	Men	2057	std84	0.0219933	0.0234751	0.0260854	alcohol	Projected
Czech Republic	CZE	Men	2058	std84	0.0217096	0.0230107	0.0253161	alcohol	Projected
Czech Republic	CZE	Men	2059	std84	0.0214662	0.0226029	0.0246403	alcohol	Projected
Czech Republic	CZE	Men	2060	std84	0.0212541	0.0222437	0.0240342	alcohol	Projected
Czech Republic	CZE	Men	2061	std84	0.0210693	0.0219277	0.0234874	alcohol	Projected
Czech Republic	CZE	Men	2062	std84	0.0209087	0.0216513	0.0230119	alcohol	Projected
Czech Republic	CZE	Men	2063	std84	0.0207708	0.0214111	0.0225945	alcohol	Projected
Czech Republic	CZE	Men	2064	std84	0.0206519	0.0212018	0.0222335	alcohol	Projected
Czech Republic	CZE	Men	2065	std84	0.020549	0.0210204	0.0219075	alcohol	Projected
Czech Republic	CZE	Men	1990	std84		0.0885337		obesity	Observed
Czech Republic	CZE	Men	1991	std84		0.0901451		obesity	Observed
Czech Republic	CZE	Men	1992	std84		0.0917581		obesity	Observed
Czech Republic	CZE	Men	1993	std84		0.0933708		obesity	Observed
Czech Republic	CZE	Men	1994	std84		0.0949919		obesity	Observed
Czech Republic	CZE	Men	1995	std84		0.0966224		obesity	Observed
Czech Republic	CZE	Men	1996	std84		0.0982692		obesity	Observed
Czech Republic	CZE	Men	1997	std84		0.0999413		obesity	Observed
Czech Republic	CZE	Men	1998	std84		0.101638		obesity	Observed
Czech Republic	CZE	Men	1999	std84		0.103366		obesity	Observed
Czech Republic	CZE	Men	2000	std84		0.105116		obesity	Observed
Czech Republic	CZE	Men	2001	std84		0.1069		obesity	Observed
Czech Republic	CZE	Men	2002	std84		0.108713		obesity	Observed
Czech Republic	CZE	Men	2003	std84		0.110564		obesity	Observed
Czech Republic	CZE	Men	2004	std84		0.112438		obesity	Observed
Czech Republic	CZE	Men	2005	std84		0.114331		obesity	Observed
Czech Republic	CZE	Men	2006	std84		0.116248		obesity	Observed
Czech Republic	CZE	Men	2007	std84		0.118184		obesity	Observed
Czech Republic	CZE	Men	2008	std84		0.120137		obesity	Observed
Czech Republic	CZE	Men	2009	std84		0.122102		obesity	Observed
Czech Republic	CZE	Men	2010	std84		0.124076		obesity	Observed
Czech Republic	CZE	Men	2011	std84		0.126063		obesity	Observed
Czech Republic	CZE	Men	2012	std84		0.128061		obesity	Observed
Czech Republic	CZE	Men	2013	std84		0.130074		obesity	Observed
Czech Republic	CZE	Men	2014	std84		0.132099		obesity	Observed
Czech Republic	CZE	Men	2015	std84		0.134139		obesity	Observed
Czech Republic	CZE	Men	2016	std84		0.136206		obesity	Observed
Czech Republic	CZE	Men	2017	std84	0.138673	0.138697	0.138721	obesity	Projected
Czech Republic	CZE	Men	2018	std84	0.140768	0.140821	0.140875	obesity	Projected
Czech Republic	CZE	Men	2019	std84	0.142848	0.142939	0.143032	obesity	Projected
Czech Republic	CZE	Men	2020	std84	0.144913	0.145049	0.145188	obesity	Projected
Czech Republic	CZE	Men	2021	std84	0.146957	0.147145	0.147337	obesity	Projected
Czech Republic	CZE	Men	2022	std84	0.148977	0.149225	0.149478	obesity	Projected
Czech Republic	CZE	Men	2023	std84	0.150971	0.151285	0.151604	obesity	Projected
Czech Republic	CZE	Men	2024	std84	0.152932	0.15332	0.153713	obesity	Projected
Czech Republic	CZE	Men	2025	std84	0.15486	0.155328	0.155804	obesity	Projected
Czech Republic	CZE	Men	2026	std84	0.156752	0.157306	0.15787	obesity	Projected
Czech Republic	CZE	Men	2027	std84	0.158603	0.159249	0.159908	obesity	Projected
Czech Republic	CZE	Men	2028	std84	0.160409	0.161154	0.161913	obesity	Projected
Czech Republic	CZE	Men	2029	std84	0.162168	0.163017	0.16388	obesity	Projected
Czech Republic	CZE	Men	2030	std84	0.163873	0.164836	0.165813	obesity	Projected
Czech Republic	CZE	Men	2031	std84	0.16553	0.166606	0.167704	obesity	Projected
Czech Republic	CZE	Men	2032	std84	0.167127	0.168324	0.169544	obesity	Projected
Czech Republic	CZE	Men	2033	std84	0.168661	0.169988	0.171335	obesity	Projected
Czech Republic	CZE	Men	2034	std84	0.17013	0.171593	0.173078	obesity	Projected
Czech Republic	CZE	Men	2035	std84	0.17154	0.173139	0.174764	obesity	Projected
Czech Republic	CZE	Men	2036	std84	0.172884	0.174623	0.176388	obesity	Projected
Czech Republic	CZE	Men	2037	std84	0.174155	0.176042	0.177962	obesity	Projected
Czech Republic	CZE	Men	2038	std84	0.175352	0.177392	0.179468	obesity	Projected
Czech Republic	CZE	Men	2039	std84	0.176478	0.178673	0.180902	obesity	Projected
Czech Republic	CZE	Men	2040	std84	0.177529	0.179881	0.182271	obesity	Projected
Czech Republic	CZE	Men	2041	std84	0.178501	0.181013	0.183571	obesity	Projected
Czech Republic	CZE	Men	2042	std84	0.179394	0.18207	0.184798	obesity	Projected
Czech Republic	CZE	Men	2043	std84	0.180205	0.183049	0.18595	obesity	Projected
Czech Republic	CZE	Men	2044	std84	0.180938	0.183951	0.187035	obesity	Projected
Czech Republic	CZE	Men	2045	std84	0.181588	0.184772	0.188035	obesity	Projected
Czech Republic	CZE	Men	2046	std84	0.18215	0.185512	0.188946	obesity	Projected
Czech Republic	CZE	Men	2047	std84	0.182624	0.186173	0.189791	obesity	Projected
Czech Republic	CZE	Men	2048	std84	0.183016	0.186748	0.190557	obesity	Projected
Czech Republic	CZE	Men	2049	std84	0.183315	0.187237	0.191232	obesity	Projected
Czech Republic	CZE	Men	2050	std84	0.183533	0.187641	0.19183	obesity	Projected
Czech Republic	CZE	Men	2051	std84	0.18367	0.187961	0.192349	obesity	Projected
Czech Republic	CZE	Men	2052	std84	0.183711	0.188193	0.192775	obesity	Projected
Czech Republic	CZE	Men	2053	std84	0.183663	0.18834	0.193121	obesity	Projected
Czech Republic	CZE	Men	2054	std84	0.183537	0.188402	0.193371	obesity	Projected
Czech Republic	CZE	Men	2055	std84	0.183324	0.188373	0.193542	obesity	Projected
Czech Republic	CZE	Men	2056	std84	0.183018	0.188257	0.193614	obesity	Projected
Czech Republic	CZE	Men	2057	std84	0.182631	0.188059	0.193609	obesity	Projected
Czech Republic	CZE	Men	2058	std84	0.18215	0.187766	0.193526	obesity	Projected
Czech Republic	CZE	Men	2059	std84	0.181603	0.187395	0.193339	obesity	Projected
Czech Republic	CZE	Men	2060	std84	0.180967	0.186935	0.193074	obesity	Projected
Czech Republic	CZE	Men	2061	std84	0.18024	0.186388	0.192728	obesity	Projected
Czech Republic	CZE	Men	2062	std84	0.179429	0.185757	0.192287	obesity	Projected
Czech Republic	CZE	Men	2063	std84	0.178531	0.185049	0.191764	obesity	Projected
Czech Republic	CZE	Men	2064	std84	0.17756	0.184254	0.191157	obesity	Projected
Czech Republic	CZE	Men	2065	std84	0.176514	0.183379	0.190475	obesity	Projected
Czech Republic		Men	1990	std84		0.512662		lifestyle (combined)	Observed
Czech Republic		Men	1991	std84		0.512623		lifestyle (combined)	Observed
Czech Republic		Men	1992	std84		0.511401		lifestyle (combined)	Observed
Czech Republic		Men	1993	std84		0.513277		lifestyle (combined)	Observed
Czech Republic		Men	1994	std84		0.500688		lifestyle (combined)	Observed
Czech Republic		Men	1995	std84		0.512497		lifestyle (combined)	Observed
Czech Republic		Men	1996	std84		0.504214		lifestyle (combined)	Observed
Czech Republic		Men	1997	std84		0.508045		lifestyle (combined)	Observed
Czech Republic		Men	1998	std84		0.501786		lifestyle (combined)	Observed
Czech Republic		Men	1999	std84		0.504464		lifestyle (combined)	Observed
Czech Republic		Men	2000	std84		0.508802		lifestyle (combined)	Observed
Czech Republic		Men	2001	std84		0.501039		lifestyle (combined)	Observed
Czech Republic		Men	2002	std84		0.4984		lifestyle (combined)	Observed
Czech Republic		Men	2003	std84		0.496284		lifestyle (combined)	Observed
Czech Republic		Men	2004	std84		0.496365		lifestyle (combined)	Observed
Czech Republic		Men	2005	std84		0.486311		lifestyle (combined)	Observed
Czech Republic		Men	2006	std84		0.482026		lifestyle (combined)	Observed
Czech Republic		Men	2007	std84		0.474581		lifestyle (combined)	Observed
Czech Republic		Men	2008	std84		0.464443		lifestyle (combined)	Observed
Czech Republic		Men	2009	std84		0.463236		lifestyle (combined)	Observed
Czech Republic		Men	2010	std84		0.465098		lifestyle (combined)	Observed
Czech Republic		Men	2011	std84		0.456793		lifestyle (combined)	Observed
Czech Republic		Men	2012	std84		0.448047		lifestyle (combined)	Observed
Czech Republic		Men	2013	std84		0.441569		lifestyle (combined)	Observed
Czech Republic		Men	2014	std84		0.431712		lifestyle (combined)	Observed
Czech Republic		Men	2015	std84		0.424714		lifestyle (combined)	Observed
Czech Republic		Men	2015	std84		0.424714		lifestyle (combined)	Projected
Czech Republic		Men	2016	std84		0.422865		lifestyle (combined)	Observed
Czech Republic		Men	2016	std84		0.422865		lifestyle (combined)	Projected
Czech Republic		Men	2017	std84		0.392834		lifestyle (combined)	Projected
Czech Republic		Men	2018	std84		0.383863		lifestyle (combined)	Projected
Czech Republic		Men	2019	std84		0.374691		lifestyle (combined)	Projected
Czech Republic		Men	2020	std84		0.36632		lifestyle (combined)	Projected
Czech Republic		Men	2021	std84		0.358354		lifestyle (combined)	Projected
Czech Republic		Men	2022	std84		0.350999		lifestyle (combined)	Projected
Czech Republic		Men	2023	std84		0.344127		lifestyle (combined)	Projected
Czech Republic		Men	2024	std84		0.337868		lifestyle (combined)	Projected
Czech Republic		Men	2025	std84		0.332252		lifestyle (combined)	Projected
Czech Republic		Men	2026	std84		0.326959		lifestyle (combined)	Projected
Czech Republic		Men	2027	std84		0.322318		lifestyle (combined)	Projected
Czech Republic		Men	2028	std84		0.317961		lifestyle (combined)	Projected
Czech Republic		Men	2029	std84		0.314016		lifestyle (combined)	Projected
Czech Republic		Men	2030	std84		0.310429		lifestyle (combined)	Projected
Czech Republic		Men	2031	std84		0.306862		lifestyle (combined)	Projected
Czech Republic		Men	2032	std84		0.303733		lifestyle (combined)	Projected
Czech Republic		Men	2033	std84		0.300557		lifestyle (combined)	Projected
Czech Republic		Men	2034	std84		0.297588		lifestyle (combined)	Projected
Czech Republic		Men	2035	std84		0.294779		lifestyle (combined)	Projected
Czech Republic		Men	2036	std84		0.292032		lifestyle (combined)	Projected
Czech Republic		Men	2037	std84		0.289419		lifestyle (combined)	Projected
Czech Republic		Men	2038	std84		0.286809		lifestyle (combined)	Projected
Czech Republic		Men	2039	std84		0.284329		lifestyle (combined)	Projected
Czech Republic		Men	2040	std84		0.281954		lifestyle (combined)	Projected
Czech Republic		Men	2041	std84		0.279714		lifestyle (combined)	Projected
Czech Republic		Men	2042	std84		0.27759		lifestyle (combined)	Projected
Czech Republic		Men	2043	std84		0.275572		lifestyle (combined)	Projected
Czech Republic		Men	2044	std84		0.273692		lifestyle (combined)	Projected
Czech Republic		Men	2045	std84		0.271964		lifestyle (combined)	Projected
Czech Republic		Men	2046	std84		0.270325		lifestyle (combined)	Projected
Czech Republic		Men	2047	std84		0.268821		lifestyle (combined)	Projected
Czech Republic		Men	2048	std84		0.267397		lifestyle (combined)	Projected
Czech Republic		Men	2049	std84		0.266066		lifestyle (combined)	Projected
Czech Republic		Men	2050	std84		0.264847		lifestyle (combined)	Projected
Czech Republic		Men	2051	std84		0.263686		lifestyle (combined)	Projected
Czech Republic		Men	2052	std84		0.262568		lifestyle (combined)	Projected
Czech Republic		Men	2053	std84		0.261517		lifestyle (combined)	Projected
Czech Republic		Men	2054	std84		0.260492		lifestyle (combined)	Projected
Czech Republic		Men	2055	std84		0.259504		lifestyle (combined)	Projected
Czech Republic		Men	2056	std84		0.258527		lifestyle (combined)	Projected
Czech Republic		Men	2057	std84		0.257567		lifestyle (combined)	Projected
Czech Republic		Men	2058	std84		0.256605		lifestyle (combined)	Projected
Czech Republic		Men	2059	std84		0.25564		lifestyle (combined)	Projected
Czech Republic		Men	2060	std84		0.254659		lifestyle (combined)	Projected
Czech Republic		Men	2061	std84		0.253658		lifestyle (combined)	Projected
Czech Republic		Men	2062	std84		0.252633		lifestyle (combined)	Projected
Czech Republic		Men	2063	std84		0.25159		lifestyle (combined)	Projected
Czech Republic		Men	2064	std84		0.250514		lifestyle (combined)	Projected
Czech Republic		Men	2065	std84		0.249395		lifestyle (combined)	Projected
Denmark	DNK	Men	1990	std84		0.335144		smoking	Observed
Denmark	DNK	Men	1991	std84		0.317784		smoking	Observed
Denmark	DNK	Men	1992	std84		0.320533		smoking	Observed
Denmark	DNK	Men	1993	std84		0.333245		smoking	Observed
Denmark	DNK	Men	1994	std84		0.319985		smoking	Observed
Denmark	DNK	Men	1995	std84		0.319632		smoking	Observed
Denmark	DNK	Men	1996	std84		0.317595		smoking	Observed
Denmark	DNK	Men	1997	std84		0.308234		smoking	Observed
Denmark	DNK	Men	1998	std84		0.289483		smoking	Observed
Denmark	DNK	Men	1999	std84		0.295759		smoking	Observed
Denmark	DNK	Men	2000	std84		0.300477		smoking	Observed
Denmark	DNK	Men	2001	std84		0.28716		smoking	Observed
Denmark	DNK	Men	2002	std84		0.27434		smoking	Observed
Denmark	DNK	Men	2003	std84		0.279617		smoking	Observed
Denmark	DNK	Men	2004	std84		0.278094		smoking	Observed
Denmark	DNK	Men	2005	std84		0.268284		smoking	Observed
Denmark	DNK	Men	2006	std84		0.278078		smoking	Observed
Denmark	DNK	Men	2007	std84		0.246757		smoking	Observed
Denmark	DNK	Men	2008	std84		0.260487		smoking	Observed
Denmark	DNK	Men	2009	std84		0.238874		smoking	Observed
Denmark	DNK	Men	2010	std84		0.235438		smoking	Observed
Denmark	DNK	Men	2011	std84		0.222783		smoking	Observed
Denmark	DNK	Men	2012	std84		0.23239		smoking	Observed
Denmark	DNK	Men	2013	std84		0.229755		smoking	Observed
Denmark	DNK	Men	2014	std84		0.224865		smoking	Observed
Denmark	DNK	Men	2015	std84		0.203983		smoking	Observed
Denmark	DNK	Men	2016	std84	0.134941	0.173273	0.221608	smoking	Projected
Denmark	DNK	Men	2017	std84	0.119364	0.167651	0.236323	smoking	Projected
Denmark	DNK	Men	2018	std84	0.10804	0.162249	0.246554	smoking	Projected
Denmark	DNK	Men	2019	std84	0.0997214	0.156861	0.25269	smoking	Projected
Denmark	DNK	Men	2020	std84	0.0931952	0.1517	0.258536	smoking	Projected
Denmark	DNK	Men	2021	std84	0.0881117	0.146703	0.263349	smoking	Projected
Denmark	DNK	Men	2022	std84	0.0836308	0.142202	0.266416	smoking	Projected
Denmark	DNK	Men	2023	std84	0.0803283	0.137954	0.269958	smoking	Projected
Denmark	DNK	Men	2024	std84	0.0773928	0.133793	0.273252	smoking	Projected
Denmark	DNK	Men	2025	std84	0.0751146	0.129954	0.274915	smoking	Projected
Denmark	DNK	Men	2026	std84	0.0729518	0.126669	0.278493	smoking	Projected
Denmark	DNK	Men	2027	std84	0.0713179	0.123508	0.279963	smoking	Projected
Denmark	DNK	Men	2028	std84	0.0698445	0.120224	0.281896	smoking	Projected
Denmark	DNK	Men	2029	std84	0.0685352	0.117234	0.28204	smoking	Projected
Denmark	DNK	Men	2030	std84	0.0674678	0.114262	0.282535	smoking	Projected
Denmark	DNK	Men	2031	std84	0.0665	0.111476	0.282378	smoking	Projected
Denmark	DNK	Men	2032	std84	0.0656472	0.109053	0.285144	smoking	Projected
Denmark	DNK	Men	2033	std84	0.064924	0.106689	0.285839	smoking	Projected
Denmark	DNK	Men	2034	std84	0.0643341	0.104851	0.285884	smoking	Projected
Denmark	DNK	Men	2035	std84	0.0639014	0.103035	0.287246	smoking	Projected
Denmark	DNK	Men	2036	std84	0.0634508	0.101566	0.286741	smoking	Projected
Denmark	DNK	Men	2037	std84	0.0630713	0.100009	0.288701	smoking	Projected
Denmark	DNK	Men	2038	std84	0.0627045	0.0985387	0.288886	smoking	Projected
Denmark	DNK	Men	2039	std84	0.0623897	0.0970091	0.288762	smoking	Projected
Denmark	DNK	Men	2040	std84	0.0621093	0.0954587	0.286884	smoking	Projected
Denmark	DNK	Men	2041	std84	0.0618794	0.0938289	0.287569	smoking	Projected
Denmark	DNK	Men	2042	std84	0.0616266	0.0926481	0.288113	smoking	Projected
Denmark	DNK	Men	2043	std84	0.0614343	0.0914713	0.290905	smoking	Projected
Denmark	DNK	Men	2044	std84	0.061219	0.0902396	0.291644	smoking	Projected
Denmark	DNK	Men	2045	std84	0.0610536	0.0891202	0.291351	smoking	Projected
Denmark	DNK	Men	2046	std84	0.0608656	0.0880074	0.292188	smoking	Projected
Denmark	DNK	Men	2047	std84	0.06072	0.087025	0.291194	smoking	Projected
Denmark	DNK	Men	2048	std84	0.0605799	0.085932	0.293296	smoking	Projected
Denmark	DNK	Men	2049	std84	0.0604818	0.0849664	0.291906	smoking	Projected
Denmark	DNK	Men	2050	std84	0.0603635	0.0839381	0.29252	smoking	Projected
Denmark	DNK	Men	2051	std84	0.0602586	0.0828902	0.29351	smoking	Projected
Denmark	DNK	Men	2052	std84	0.0601853	0.0821118	0.293832	smoking	Projected
Denmark	DNK	Men	2053	std84	0.0601194	0.0812583	0.295081	smoking	Projected
Denmark	DNK	Men	2054	std84	0.0600455	0.0805623	0.298051	smoking	Projected
Denmark	DNK	Men	2055	std84	0.0599804	0.0797362	0.299568	smoking	Projected
Denmark	DNK	Men	2056	std84	0.0599266	0.0789767	0.302107	smoking	Projected
Denmark	DNK	Men	2057	std84	0.0598651	0.0782367	0.300801	smoking	Projected
Denmark	DNK	Men	2058	std84	0.0598107	0.0775461	0.300058	smoking	Projected
Denmark	DNK	Men	2059	std84	0.0597529	0.0766174	0.299724	smoking	Projected
Denmark	DNK	Men	2060	std84	0.0597066	0.0759401	0.297255	smoking	Projected
Denmark	DNK	Men	2061	std84	0.059666	0.0752266	0.298572	smoking	Projected
Denmark	DNK	Men	2062	std84	0.0596356	0.0745667	0.296839	smoking	Projected
Denmark	DNK	Men	2063	std84	0.0596074	0.0739926	0.297553	smoking	Projected
Denmark	DNK	Men	2064	std84	0.0595777	0.073364	0.296823	smoking	Projected
Denmark	DNK	Men	2065	std84	0.0595526	0.0726518	0.295913	smoking	Projected
Denmark	DNK	Men	1990	std84		0.0724787		alcohol	Observed
Denmark	DNK	Men	1991	std84		0.0750321		alcohol	Observed
Denmark	DNK	Men	1992	std84		0.0764651		alcohol	Observed
Denmark	DNK	Men	1993	std84		0.0782492		alcohol	Observed
Denmark	DNK	Men	1994	std84		0.0814849		alcohol	Observed
Denmark	DNK	Men	1995	std84		0.0823626		alcohol	Observed
Denmark	DNK	Men	1996	std84		0.0857071		alcohol	Observed
Denmark	DNK	Men	1997	std84		0.0898423		alcohol	Observed
Denmark	DNK	Men	1998	std84		0.0937685		alcohol	Observed
Denmark	DNK	Men	1999	std84		0.103052		alcohol	Observed
Denmark	DNK	Men	2000	std84		0.0999011		alcohol	Observed
Denmark	DNK	Men	2001	std84		0.101252		alcohol	Observed
Denmark	DNK	Men	2002	std84		0.106554		alcohol	Observed
Denmark	DNK	Men	2003	std84		0.11176		alcohol	Observed
Denmark	DNK	Men	2004	std84		0.110755		alcohol	Observed
Denmark	DNK	Men	2005	std84		0.114869		alcohol	Observed
Denmark	DNK	Men	2006	std84		0.114895		alcohol	Observed
Denmark	DNK	Men	2007	std84		0.115072		alcohol	Observed
Denmark	DNK	Men	2008	std84		0.111964		alcohol	Observed
Denmark	DNK	Men	2009	std84		0.110486		alcohol	Observed
Denmark	DNK	Men	2010	std84		0.107662		alcohol	Observed
Denmark	DNK	Men	2011	std84		0.106866		alcohol	Observed
Denmark	DNK	Men	2012	std84		0.105482		alcohol	Observed
Denmark	DNK	Men	2013	std84		0.106237		alcohol	Observed
Denmark	DNK	Men	2014	std84		0.106214		alcohol	Observed
Denmark	DNK	Men	2015	std84		0.104614		alcohol	Observed
Denmark	DNK	Men	2016	std84		0.106187		alcohol	Observed
Denmark	DNK	Men	2017	std84	0.0994091	0.104429	0.109658	alcohol	Projected
Denmark	DNK	Men	2018	std84	0.0942124	0.103548	0.113847	alcohol	Projected
Denmark	DNK	Men	2019	std84	0.0886328	0.101812	0.116879	alcohol	Projected
Denmark	DNK	Men	2020	std84	0.0832472	0.099438	0.118947	alcohol	Projected
Denmark	DNK	Men	2021	std84	0.0779842	0.0965862	0.120233	alcohol	Projected
Denmark	DNK	Men	2022	std84	0.0730882	0.0934635	0.120497	alcohol	Projected
Denmark	DNK	Men	2023	std84	0.0684426	0.0901456	0.119808	alcohol	Projected
Denmark	DNK	Men	2024	std84	0.0641334	0.0865729	0.118416	alcohol	Projected
Denmark	DNK	Men	2025	std84	0.060026	0.0829005	0.116556	alcohol	Projected
Denmark	DNK	Men	2026	std84	0.0562918	0.0791604	0.114274	alcohol	Projected
Denmark	DNK	Men	2027	std84	0.0527408	0.075477	0.111401	alcohol	Projected
Denmark	DNK	Men	2028	std84	0.0495328	0.0717556	0.108255	alcohol	Projected
Denmark	DNK	Men	2029	std84	0.0465245	0.0681039	0.104904	alcohol	Projected
Denmark	DNK	Men	2030	std84	0.0437638	0.0644875	0.100861	alcohol	Projected
Denmark	DNK	Men	2031	std84	0.0411836	0.0609987	0.0969721	alcohol	Projected
Denmark	DNK	Men	2032	std84	0.0388802	0.0576354	0.0928794	alcohol	Projected
Denmark	DNK	Men	2033	std84	0.0367883	0.0544108	0.088789	alcohol	Projected
Denmark	DNK	Men	2034	std84	0.0348758	0.0513296	0.0844339	alcohol	Projected
Denmark	DNK	Men	2035	std84	0.0331645	0.048425	0.0801597	alcohol	Projected
Denmark	DNK	Men	2036	std84	0.0315596	0.0457264	0.075655	alcohol	Projected
Denmark	DNK	Men	2037	std84	0.0301521	0.0431182	0.0713978	alcohol	Projected
Denmark	DNK	Men	2038	std84	0.0289139	0.0407101	0.0673812	alcohol	Projected
Denmark	DNK	Men	2039	std84	0.0277526	0.0385189	0.0633653	alcohol	Projected
Denmark	DNK	Men	2040	std84	0.0267495	0.0364938	0.0596021	alcohol	Projected
Denmark	DNK	Men	2041	std84	0.0258415	0.0346394	0.0559501	alcohol	Projected
Denmark	DNK	Men	2042	std84	0.0250389	0.0329456	0.0525326	alcohol	Projected
Denmark	DNK	Men	2043	std84	0.0243487	0.0314437	0.0494303	alcohol	Projected
Denmark	DNK	Men	2044	std84	0.0237542	0.0300682	0.0464734	alcohol	Projected
Denmark	DNK	Men	2045	std84	0.0232276	0.028808	0.0437511	alcohol	Projected
Denmark	DNK	Men	2046	std84	0.0227536	0.0276867	0.0411769	alcohol	Projected
Denmark	DNK	Men	2047	std84	0.022358	0.0266847	0.0388974	alcohol	Projected
Denmark	DNK	Men	2048	std84	0.0220058	0.0258028	0.0367667	alcohol	Projected
Denmark	DNK	Men	2049	std84	0.0217025	0.0250253	0.0347961	alcohol	Projected
Denmark	DNK	Men	2050	std84	0.0214355	0.0243424	0.0330068	alcohol	Projected
Denmark	DNK	Men	2051	std84	0.0212082	0.0237424	0.0313893	alcohol	Projected
Denmark	DNK	Men	2052	std84	0.0210181	0.0232141	0.0299936	alcohol	Projected
Denmark	DNK	Men	2053	std84	0.0208591	0.0227529	0.028718	alcohol	Projected
Denmark	DNK	Men	2054	std84	0.0207234	0.0223476	0.0275447	alcohol	Projected
Denmark	DNK	Men	2055	std84	0.0206037	0.0219957	0.0265202	alcohol	Projected
Denmark	DNK	Men	2056	std84	0.0205035	0.0216915	0.0256171	alcohol	Projected
Denmark	DNK	Men	2057	std84	0.020419	0.0214306	0.0248445	alcohol	Projected
Denmark	DNK	Men	2058	std84	0.0203494	0.0212063	0.0241469	alcohol	Projected
Denmark	DNK	Men	2059	std84	0.0202886	0.0210131	0.0235591	alcohol	Projected
Denmark	DNK	Men	2060	std84	0.0202389	0.020849	0.0230187	alcohol	Projected
Denmark	DNK	Men	2061	std84	0.0201947	0.0207086	0.0225595	alcohol	Projected
Denmark	DNK	Men	2062	std84	0.0201595	0.0205892	0.0221632	alcohol	Projected
Denmark	DNK	Men	2063	std84	0.0201295	0.020488	0.0218203	alcohol	Projected
Denmark	DNK	Men	2064	std84	0.0201059	0.0204032	0.0215329	alcohol	Projected
Denmark	DNK	Men	2065	std84	0.0200861	0.0203333	0.0212873	alcohol	Projected
Denmark	DNK	Men	1990	std84		0.05739		obesity	Observed
Denmark	DNK	Men	1991	std84		0.0591857		obesity	Observed
Denmark	DNK	Men	1992	std84		0.0610055		obesity	Observed
Denmark	DNK	Men	1993	std84		0.0628492		obesity	Observed
Denmark	DNK	Men	1994	std84		0.0647145		obesity	Observed
Denmark	DNK	Men	1995	std84		0.0666034		obesity	Observed
Denmark	DNK	Men	1996	std84		0.0685073		obesity	Observed
Denmark	DNK	Men	1997	std84		0.0704238		obesity	Observed
Denmark	DNK	Men	1998	std84		0.072344		obesity	Observed
Denmark	DNK	Men	1999	std84		0.0742721		obesity	Observed
Denmark	DNK	Men	2000	std84		0.0762066		obesity	Observed
Denmark	DNK	Men	2001	std84		0.078171		obesity	Observed
Denmark	DNK	Men	2002	std84		0.0801574		obesity	Observed
Denmark	DNK	Men	2003	std84		0.0821676		obesity	Observed
Denmark	DNK	Men	2004	std84		0.084202		obesity	Observed
Denmark	DNK	Men	2005	std84		0.0862539		obesity	Observed
Denmark	DNK	Men	2006	std84		0.0883207		obesity	Observed
Denmark	DNK	Men	2007	std84		0.0903998		obesity	Observed
Denmark	DNK	Men	2008	std84		0.0924931		obesity	Observed
Denmark	DNK	Men	2009	std84		0.0946069		obesity	Observed
Denmark	DNK	Men	2010	std84		0.0967416		obesity	Observed
Denmark	DNK	Men	2011	std84		0.0988919		obesity	Observed
Denmark	DNK	Men	2012	std84		0.101059		obesity	Observed
Denmark	DNK	Men	2013	std84		0.103256		obesity	Observed
Denmark	DNK	Men	2014	std84		0.105481		obesity	Observed
Denmark	DNK	Men	2015	std84		0.107733		obesity	Observed
Denmark	DNK	Men	2016	std84		0.110016		obesity	Observed
Denmark	DNK	Men	2017	std84	0.112654	0.112718	0.112781	obesity	Projected
Denmark	DNK	Men	2018	std84	0.114876	0.115023	0.115169	obesity	Projected
Denmark	DNK	Men	2019	std84	0.11705	0.117302	0.117553	obesity	Projected
Denmark	DNK	Men	2020	std84	0.11917	0.119547	0.119924	obesity	Projected
Denmark	DNK	Men	2021	std84	0.121225	0.121753	0.122274	obesity	Projected
Denmark	DNK	Men	2022	std84	0.12322	0.123909	0.124598	obesity	Projected
Denmark	DNK	Men	2023	std84	0.125139	0.12601	0.126893	obesity	Projected
Denmark	DNK	Men	2024	std84	0.126976	0.128051	0.129142	obesity	Projected
Denmark	DNK	Men	2025	std84	0.12873	0.130027	0.131343	obesity	Projected
Denmark	DNK	Men	2026	std84	0.13039	0.131931	0.133488	obesity	Projected
Denmark	DNK	Men	2027	std84	0.131953	0.133751	0.135571	obesity	Projected
Denmark	DNK	Men	2028	std84	0.13342	0.135488	0.137591	obesity	Projected
Denmark	DNK	Men	2029	std84	0.134779	0.137137	0.139533	obesity	Projected
Denmark	DNK	Men	2030	std84	0.13603	0.138687	0.141402	obesity	Projected
Denmark	DNK	Men	2031	std84	0.137172	0.140134	0.143176	obesity	Projected
Denmark	DNK	Men	2032	std84	0.138191	0.141482	0.144866	obesity	Projected
Denmark	DNK	Men	2033	std84	0.139077	0.142717	0.14645	obesity	Projected
Denmark	DNK	Men	2034	std84	0.139849	0.14384	0.147934	obesity	Projected
Denmark	DNK	Men	2035	std84	0.140492	0.144838	0.149312	obesity	Projected
Denmark	DNK	Men	2036	std84	0.141001	0.14572	0.150582	obesity	Projected
Denmark	DNK	Men	2037	std84	0.1414	0.146483	0.151754	obesity	Projected
Denmark	DNK	Men	2038	std84	0.141664	0.147125	0.152797	obesity	Projected
Denmark	DNK	Men	2039	std84	0.141797	0.147632	0.153716	obesity	Projected
Denmark	DNK	Men	2040	std84	0.141785	0.148005	0.154515	obesity	Projected
Denmark	DNK	Men	2041	std84	0.141639	0.148254	0.155206	obesity	Projected
Denmark	DNK	Men	2042	std84	0.141349	0.148375	0.155749	obesity	Projected
Denmark	DNK	Men	2043	std84	0.140938	0.14836	0.156185	obesity	Projected
Denmark	DNK	Men	2044	std84	0.14041	0.148217	0.156482	obesity	Projected
Denmark	DNK	Men	2045	std84	0.139757	0.147944	0.156642	obesity	Projected
Denmark	DNK	Men	2046	std84	0.138981	0.147543	0.156684	obesity	Projected
Denmark	DNK	Men	2047	std84	0.138083	0.147018	0.156575	obesity	Projected
Denmark	DNK	Men	2048	std84	0.137071	0.146352	0.156359	obesity	Projected
Denmark	DNK	Men	2049	std84	0.135937	0.145566	0.155981	obesity	Projected
Denmark	DNK	Men	2050	std84	0.134678	0.144664	0.155503	obesity	Projected
Denmark	DNK	Men	2051	std84	0.133331	0.143631	0.15487	obesity	Projected
Denmark	DNK	Men	2052	std84	0.131875	0.142484	0.154117	obesity	Projected
Denmark	DNK	Men	2053	std84	0.130327	0.141238	0.153242	obesity	Projected
Denmark	DNK	Men	2054	std84	0.128692	0.139874	0.152247	obesity	Projected
Denmark	DNK	Men	2055	std84	0.126972	0.138408	0.151154	obesity	Projected
Denmark	DNK	Men	2056	std84	0.125165	0.136835	0.149945	obesity	Projected
Denmark	DNK	Men	2057	std84	0.123264	0.135174	0.148635	obesity	Projected
Denmark	DNK	Men	2058	std84	0.12132	0.133419	0.147166	obesity	Projected
Denmark	DNK	Men	2059	std84	0.119293	0.13158	0.145604	obesity	Projected
Denmark	DNK	Men	2060	std84	0.117224	0.12967	0.143926	obesity	Projected
Denmark	DNK	Men	2061	std84	0.115111	0.127685	0.142174	obesity	Projected
Denmark	DNK	Men	2062	std84	0.112947	0.12563	0.14034	obesity	Projected
Denmark	DNK	Men	2063	std84	0.110785	0.12351	0.138432	obesity	Projected
Denmark	DNK	Men	2064	std84	0.108569	0.121352	0.136432	obesity	Projected
Denmark	DNK	Men	2065	std84	0.106335	0.119134	0.134359	obesity	Projected
Denmark		Men	1990	std84		0.418722		lifestyle (combined)	Observed
Denmark		Men	1991	std84		0.40632		lifestyle (combined)	Observed
Denmark		Men	1992	std84		0.410771		lifestyle (combined)	Observed
Denmark		Men	1993	std84		0.424044		lifestyle (combined)	Observed
Denmark		Men	1994	std84		0.415817		lifestyle (combined)	Observed
Denmark		Men	1995	std84		0.417251		lifestyle (combined)	Observed
Denmark		Men	1996	std84		0.418824		lifestyle (combined)	Observed
Denmark		Men	1997	std84		0.414724		lifestyle (combined)	Observed
Denmark		Men	1998	std84		0.402688		lifestyle (combined)	Observed
Denmark		Men	1999	std84		0.415248		lifestyle (combined)	Observed
Denmark		Men	2000	std84		0.418343		lifestyle (combined)	Observed
Denmark		Men	2001	std84		0.409418		lifestyle (combined)	Observed
Denmark		Men	2002	std84		0.403631		lifestyle (combined)	Observed
Denmark		Men	2003	std84		0.412704		lifestyle (combined)	Observed
Denmark		Men	2004	std84		0.412102		lifestyle (combined)	Observed
Denmark		Men	2005	std84		0.408199		lifestyle (combined)	Observed
Denmark		Men	2006	std84		0.417458		lifestyle (combined)	Observed
Denmark		Men	2007	std84		0.393692		lifestyle (combined)	Observed
Denmark		Men	2008	std84		0.404027		lifestyle (combined)	Observed
Denmark		Men	2009	std84		0.387019		lifestyle (combined)	Observed
Denmark		Men	2010	std84		0.383754		lifestyle (combined)	Observed
Denmark		Men	2011	std84		0.374488		lifestyle (combined)	Observed
Denmark		Men	2012	std84		0.38275		lifestyle (combined)	Observed
Denmark		Men	2013	std84		0.382667		lifestyle (combined)	Observed
Denmark		Men	2014	std84		0.380273		lifestyle (combined)	Observed
Denmark		Men	2015	std84		0.364043		lifestyle (combined)	Observed
Denmark		Men	2015	std84		0.364043		lifestyle (combined)	Projected
Denmark		Men	2016	std84		0.342356		lifestyle (combined)	Projected
Denmark		Men	2017	std84		0.338596		lifestyle (combined)	Projected
Denmark		Men	2018	std84		0.335379		lifestyle (combined)	Projected
Denmark		Men	2019	std84		0.331535		lifestyle (combined)	Projected
Denmark		Men	2020	std84		0.327381		lifestyle (combined)	Projected
Denmark		Men	2021	std84		0.322976		lifestyle (combined)	Projected
Denmark		Men	2022	std84		0.318729		lifestyle (combined)	Projected
Denmark		Men	2023	std84		0.314498		lifestyle (combined)	Projected
Denmark		Men	2024	std84		0.310099		lifestyle (combined)	Projected
Denmark		Men	2025	std84		0.305832		lifestyle (combined)	Projected
Denmark		Men	2026	std84		0.301901		lifestyle (combined)	Projected
Denmark		Men	2027	std84		0.298046		lifestyle (combined)	Projected
Denmark		Men	2028	std84		0.293999		lifestyle (combined)	Projected
Denmark		Men	2029	std84		0.290168		lifestyle (combined)	Projected
Denmark		Men	2030	std84		0.2863		lifestyle (combined)	Projected
Denmark		Men	2031	std84		0.282592		lifestyle (combined)	Projected
Denmark		Men	2032	std84		0.279191		lifestyle (combined)	Projected
Denmark		Men	2033	std84		0.275848		lifestyle (combined)	Projected
Denmark		Men	2034	std84		0.272947		lifestyle (combined)	Projected
Denmark		Men	2035	std84		0.270094		lifestyle (combined)	Projected
Denmark		Men	2036	std84		0.267581		lifestyle (combined)	Projected
Denmark		Men	2037	std84		0.264964		lifestyle (combined)	Projected
Denmark		Men	2038	std84		0.262466		lifestyle (combined)	Projected
Denmark		Men	2039	std84		0.259966		lifestyle (combined)	Projected
Denmark		Men	2040	std84		0.25746		lifestyle (combined)	Projected
Denmark		Men	2041	std84		0.254908		lifestyle (combined)	Projected
Denmark		Men	2042	std84		0.252734		lifestyle (combined)	Projected
Denmark		Men	2043	std84		0.25059		lifestyle (combined)	Projected
Denmark		Men	2044	std84		0.248382		lifestyle (combined)	Projected
Denmark		Men	2045	std84		0.246238		lifestyle (combined)	Projected
Denmark		Men	2046	std84		0.24409		lifestyle (combined)	Projected
Denmark		Men	2047	std84		0.24203		lifestyle (combined)	Projected
Denmark		Men	2048	std84		0.239842		lifestyle (combined)	Projected
Denmark		Men	2049	std84		0.23773		lifestyle (combined)	Projected
Denmark		Men	2050	std84		0.235533		lifestyle (combined)	Projected
Denmark		Men	2051	std84		0.233263		lifestyle (combined)	Projected
Denmark		Men	2052	std84		0.231168		lifestyle (combined)	Projected
Denmark		Men	2053	std84		0.228971		lifestyle (combined)	Projected
Denmark		Men	2054	std84		0.226841		lifestyle (combined)	Projected
Denmark		Men	2055	std84		0.224548		lifestyle (combined)	Projected
Denmark		Men	2056	std84		0.222249		lifestyle (combined)	Projected
Denmark		Men	2057	std84		0.219918		lifestyle (combined)	Projected
Denmark		Men	2058	std84		0.217571		lifestyle (combined)	Projected
Denmark		Men	2059	std84		0.214966		lifestyle (combined)	Projected
Denmark		Men	2060	std84		0.21253		lifestyle (combined)	Projected
Denmark		Men	2061	std84		0.210012		lifestyle (combined)	Projected
Denmark		Men	2062	std84		0.207489		lifestyle (combined)	Projected
Denmark		Men	2063	std84		0.204993		lifestyle (combined)	Projected
Denmark		Men	2064	std84		0.202425		lifestyle (combined)	Projected
Denmark		Men	2065	std84		0.19974		lifestyle (combined)	Projected
Finland	FIN	Men	1990	std84		0.323284		smoking	Observed
Finland	FIN	Men	1991	std84		0.293442		smoking	Observed
Finland	FIN	Men	1992	std84		0.310605		smoking	Observed
Finland	FIN	Men	1993	std84		0.298091		smoking	Observed
Finland	FIN	Men	1994	std84		0.278598		smoking	Observed
Finland	FIN	Men	1995	std84		0.278861		smoking	Observed
Finland	FIN	Men	1996	std84		0.273849		smoking	Observed
Finland	FIN	Men	1997	std84		0.2554		smoking	Observed
Finland	FIN	Men	1998	std84		0.260669		smoking	Observed
Finland	FIN	Men	1999	std84		0.241623		smoking	Observed
Finland	FIN	Men	2000	std84		0.233903		smoking	Observed
Finland	FIN	Men	2001	std84		0.23012		smoking	Observed
Finland	FIN	Men	2002	std84		0.22213		smoking	Observed
Finland	FIN	Men	2003	std84		0.223229		smoking	Observed
Finland	FIN	Men	2004	std84		0.212207		smoking	Observed
Finland	FIN	Men	2005	std84		0.213933		smoking	Observed
Finland	FIN	Men	2006	std84		0.205362		smoking	Observed
Finland	FIN	Men	2007	std84		0.20208		smoking	Observed
Finland	FIN	Men	2008	std84		0.193762		smoking	Observed
Finland	FIN	Men	2009	std84		0.193429		smoking	Observed
Finland	FIN	Men	2010	std84		0.202403		smoking	Observed
Finland	FIN	Men	2011	std84		0.185447		smoking	Observed
Finland	FIN	Men	2012	std84		0.181635		smoking	Observed
Finland	FIN	Men	2013	std84		0.183706		smoking	Observed
Finland	FIN	Men	2014	std84		0.160347		smoking	Observed
Finland	FIN	Men	2015	std84		0.165252		smoking	Observed
Finland	FIN	Men	2016	std84	0.123739	0.149403	0.181559	smoking	Projected
Finland	FIN	Men	2017	std84	0.118068	0.142094	0.172987	smoking	Projected
Finland	FIN	Men	2018	std84	0.114196	0.138112	0.169053	smoking	Projected
Finland	FIN	Men	2019	std84	0.110916	0.134419	0.165161	smoking	Projected
Finland	FIN	Men	2020	std84	0.10749	0.130856	0.1623	smoking	Projected
Finland	FIN	Men	2021	std84	0.104595	0.12748	0.158684	smoking	Projected
Finland	FIN	Men	2022	std84	0.102052	0.124566	0.156168	smoking	Projected
Finland	FIN	Men	2023	std84	0.0992874	0.12176	0.152817	smoking	Projected
Finland	FIN	Men	2024	std84	0.0972025	0.119097	0.150028	smoking	Projected
Finland	FIN	Men	2025	std84	0.0950938	0.116616	0.147753	smoking	Projected
Finland	FIN	Men	2026	std84	0.0929467	0.113926	0.144938	smoking	Projected
Finland	FIN	Men	2027	std84	0.090957	0.11161	0.142684	smoking	Projected
Finland	FIN	Men	2028	std84	0.0888592	0.109295	0.139985	smoking	Projected
Finland	FIN	Men	2029	std84	0.0874247	0.107377	0.138097	smoking	Projected
Finland	FIN	Men	2030	std84	0.0855739	0.105258	0.135913	smoking	Projected
Finland	FIN	Men	2031	std84	0.0842681	0.10333	0.133564	smoking	Projected
Finland	FIN	Men	2032	std84	0.0825614	0.101203	0.131892	smoking	Projected
Finland	FIN	Men	2033	std84	0.0808324	0.0991204	0.129926	smoking	Projected
Finland	FIN	Men	2034	std84	0.0792195	0.0970151	0.127771	smoking	Projected
Finland	FIN	Men	2035	std84	0.0778274	0.0950855	0.125575	smoking	Projected
Finland	FIN	Men	2036	std84	0.0762645	0.0932192	0.124387	smoking	Projected
Finland	FIN	Men	2037	std84	0.0752794	0.0917117	0.122725	smoking	Projected
Finland	FIN	Men	2038	std84	0.0740819	0.0902357	0.121695	smoking	Projected
Finland	FIN	Men	2039	std84	0.0730814	0.0888991	0.12111	smoking	Projected
Finland	FIN	Men	2040	std84	0.0720204	0.0875261	0.119769	smoking	Projected
Finland	FIN	Men	2041	std84	0.0710927	0.086304	0.118354	smoking	Projected
Finland	FIN	Men	2042	std84	0.0702952	0.084949	0.117778	smoking	Projected
Finland	FIN	Men	2043	std84	0.0694223	0.083827	0.117056	smoking	Projected
Finland	FIN	Men	2044	std84	0.0686534	0.0827569	0.116569	smoking	Projected
Finland	FIN	Men	2045	std84	0.0680068	0.0816919	0.115803	smoking	Projected
Finland	FIN	Men	2046	std84	0.0673793	0.0806757	0.114978	smoking	Projected
Finland	FIN	Men	2047	std84	0.0667505	0.0797857	0.114037	smoking	Projected
Finland	FIN	Men	2048	std84	0.0661438	0.0787849	0.114116	smoking	Projected
Finland	FIN	Men	2049	std84	0.0656743	0.0778864	0.113055	smoking	Projected
Finland	FIN	Men	2050	std84	0.0651364	0.0770275	0.112411	smoking	Projected
Finland	FIN	Men	2051	std84	0.0646548	0.0762192	0.111841	smoking	Projected
Finland	FIN	Men	2052	std84	0.0642501	0.0754045	0.1113	smoking	Projected
Finland	FIN	Men	2053	std84	0.0637832	0.0746251	0.110551	smoking	Projected
Finland	FIN	Men	2054	std84	0.0634068	0.0738649	0.109921	smoking	Projected
Finland	FIN	Men	2055	std84	0.0630491	0.0732131	0.109475	smoking	Projected
Finland	FIN	Men	2056	std84	0.0627386	0.0725646	0.109085	smoking	Projected
Finland	FIN	Men	2057	std84	0.0624735	0.0720362	0.108413	smoking	Projected
Finland	FIN	Men	2058	std84	0.0622591	0.0715139	0.108202	smoking	Projected
Finland	FIN	Men	2059	std84	0.0620527	0.0710241	0.106707	smoking	Projected
Finland	FIN	Men	2060	std84	0.0618379	0.0705451	0.106905	smoking	Projected
Finland	FIN	Men	2061	std84	0.0616839	0.0700593	0.106637	smoking	Projected
Finland	FIN	Men	2062	std84	0.0614844	0.0696507	0.105703	smoking	Projected
Finland	FIN	Men	2063	std84	0.0613606	0.0692415	0.104656	smoking	Projected
Finland	FIN	Men	2064	std84	0.0612014	0.068796	0.104993	smoking	Projected
Finland	FIN	Men	2065	std84	0.0610907	0.068378	0.104139	smoking	Projected
Finland	FIN	Men	1990	std84		0.0809317		alcohol	Observed
Finland	FIN	Men	1991	std84		0.0820216		alcohol	Observed
Finland	FIN	Men	1992	std84		0.0831247		alcohol	Observed
Finland	FIN	Men	1993	std84		0.0847748		alcohol	Observed
Finland	FIN	Men	1994	std84		0.0869031		alcohol	Observed
Finland	FIN	Men	1995	std84		0.088613		alcohol	Observed
Finland	FIN	Men	1996	std84		0.0913665		alcohol	Observed
Finland	FIN	Men	1997	std84		0.0947945		alcohol	Observed
Finland	FIN	Men	1998	std84		0.097645		alcohol	Observed
Finland	FIN	Men	1999	std84		0.100361		alcohol	Observed
Finland	FIN	Men	2000	std84		0.102486		alcohol	Observed
Finland	FIN	Men	2001	std84		0.105772		alcohol	Observed
Finland	FIN	Men	2002	std84		0.10785		alcohol	Observed
Finland	FIN	Men	2003	std84		0.113311		alcohol	Observed
Finland	FIN	Men	2004	std84		0.11771		alcohol	Observed
Finland	FIN	Men	2005	std84		0.118904		alcohol	Observed
Finland	FIN	Men	2006	std84		0.121724		alcohol	Observed
Finland	FIN	Men	2007	std84		0.12178		alcohol	Observed
Finland	FIN	Men	2008	std84		0.123264		alcohol	Observed
Finland	FIN	Men	2009	std84		0.122165		alcohol	Observed
Finland	FIN	Men	2010	std84		0.122304		alcohol	Observed
Finland	FIN	Men	2011	std84		0.123475		alcohol	Observed
Finland	FIN	Men	2012	std84		0.122448		alcohol	Observed
Finland	FIN	Men	2013	std84		0.122367		alcohol	Observed
Finland	FIN	Men	2014	std84		0.121391		alcohol	Observed
Finland	FIN	Men	2015	std84		0.119578		alcohol	Observed
Finland	FIN	Men	2016	std84	0.118617	0.122384	0.12623	alcohol	Projected
Finland	FIN	Men	2017	std84	0.113293	0.120697	0.128545	alcohol	Projected
Finland	FIN	Men	2018	std84	0.107933	0.119029	0.13107	alcohol	Projected
Finland	FIN	Men	2019	std84	0.102796	0.117295	0.13365	alcohol	Projected
Finland	FIN	Men	2020	std84	0.0978186	0.115496	0.135981	alcohol	Projected
Finland	FIN	Men	2021	std84	0.0930932	0.113512	0.138122	alcohol	Projected
Finland	FIN	Men	2022	std84	0.0886859	0.111404	0.139929	alcohol	Projected
Finland	FIN	Men	2023	std84	0.084493	0.10911	0.141219	alcohol	Projected
Finland	FIN	Men	2024	std84	0.0803011	0.106734	0.142095	alcohol	Projected
Finland	FIN	Men	2025	std84	0.0765172	0.10425	0.142815	alcohol	Projected
Finland	FIN	Men	2026	std84	0.0728549	0.101574	0.142855	alcohol	Projected
Finland	FIN	Men	2027	std84	0.0692652	0.0988177	0.142684	alcohol	Projected
Finland	FIN	Men	2028	std84	0.0659225	0.0959501	0.14166	alcohol	Projected
Finland	FIN	Men	2029	std84	0.0627458	0.0929983	0.140289	alcohol	Projected
Finland	FIN	Men	2030	std84	0.0596183	0.0899149	0.138674	alcohol	Projected
Finland	FIN	Men	2031	std84	0.0567546	0.0868515	0.136681	alcohol	Projected
Finland	FIN	Men	2032	std84	0.0539378	0.0837097	0.134269	alcohol	Projected
Finland	FIN	Men	2033	std84	0.0513691	0.080489	0.131579	alcohol	Projected
Finland	FIN	Men	2034	std84	0.0487929	0.0773758	0.128559	alcohol	Projected
Finland	FIN	Men	2035	std84	0.0464463	0.0742642	0.125585	alcohol	Projected
Finland	FIN	Men	2036	std84	0.0442859	0.0712578	0.121658	alcohol	Projected
Finland	FIN	Men	2037	std84	0.0422564	0.0682574	0.118153	alcohol	Projected
Finland	FIN	Men	2038	std84	0.0403422	0.0652918	0.114478	alcohol	Projected
Finland	FIN	Men	2039	std84	0.0385845	0.0623496	0.110577	alcohol	Projected
Finland	FIN	Men	2040	std84	0.0369504	0.0595417	0.106908	alcohol	Projected
Finland	FIN	Men	2041	std84	0.0354625	0.056815	0.103434	alcohol	Projected
Finland	FIN	Men	2042	std84	0.0340561	0.0542592	0.0999071	alcohol	Projected
Finland	FIN	Men	2043	std84	0.0327618	0.0518499	0.095947	alcohol	Projected
Finland	FIN	Men	2044	std84	0.0315075	0.0494996	0.0920513	alcohol	Projected
Finland	FIN	Men	2045	std84	0.0304623	0.047309	0.08808	alcohol	Projected
Finland	FIN	Men	2046	std84	0.0294633	0.0451927	0.0840394	alcohol	Projected
Finland	FIN	Men	2047	std84	0.0285177	0.0432112	0.0805399	alcohol	Projected
Finland	FIN	Men	2048	std84	0.0276947	0.0413703	0.0770171	alcohol	Projected
Finland	FIN	Men	2049	std84	0.0269253	0.0396129	0.0734889	alcohol	Projected
Finland	FIN	Men	2050	std84	0.0262446	0.0379836	0.0701857	alcohol	Projected
Finland	FIN	Men	2051	std84	0.0256045	0.0364603	0.0668549	alcohol	Projected
Finland	FIN	Men	2052	std84	0.0250185	0.035039	0.0636287	alcohol	Projected
Finland	FIN	Men	2053	std84	0.0244857	0.0337162	0.0606175	alcohol	Projected
Finland	FIN	Men	2054	std84	0.0240078	0.0324787	0.0577382	alcohol	Projected
Finland	FIN	Men	2055	std84	0.0235719	0.0313121	0.0548888	alcohol	Projected
Finland	FIN	Men	2056	std84	0.0231695	0.0302494	0.0521771	alcohol	Projected
Finland	FIN	Men	2057	std84	0.0228158	0.0292703	0.0496139	alcohol	Projected
Finland	FIN	Men	2058	std84	0.0224945	0.0283851	0.047235	alcohol	Projected
Finland	FIN	Men	2059	std84	0.0222091	0.0275622	0.0449597	alcohol	Projected
Finland	FIN	Men	2060	std84	0.0219502	0.0267965	0.0429244	alcohol	Projected
Finland	FIN	Men	2061	std84	0.0217186	0.026094	0.0410192	alcohol	Projected
Finland	FIN	Men	2062	std84	0.021519	0.0254569	0.0392209	alcohol	Projected
Finland	FIN	Men	2063	std84	0.0213402	0.0248807	0.0375064	alcohol	Projected
Finland	FIN	Men	2064	std84	0.0211811	0.0243525	0.0358717	alcohol	Projected
Finland	FIN	Men	2065	std84	0.0210358	0.023879	0.0344067	alcohol	Projected
Finland	FIN	Men	1990	std84		0.0661889		obesity	Observed
Finland	FIN	Men	1991	std84		0.0687394		obesity	Observed
Finland	FIN	Men	1992	std84		0.0712456		obesity	Observed
Finland	FIN	Men	1993	std84		0.0737133		obesity	Observed
Finland	FIN	Men	1994	std84		0.0761494		obesity	Observed
Finland	FIN	Men	1995	std84		0.0785503		obesity	Observed
Finland	FIN	Men	1996	std84		0.0809085		obesity	Observed
Finland	FIN	Men	1997	std84		0.0832292		obesity	Observed
Finland	FIN	Men	1998	std84		0.0855127		obesity	Observed
Finland	FIN	Men	1999	std84		0.0877763		obesity	Observed
Finland	FIN	Men	2000	std84		0.0900151		obesity	Observed
Finland	FIN	Men	2001	std84		0.0922242		obesity	Observed
Finland	FIN	Men	2002	std84		0.0944028		obesity	Observed
Finland	FIN	Men	2003	std84		0.0965592		obesity	Observed
Finland	FIN	Men	2004	std84		0.0987006		obesity	Observed
Finland	FIN	Men	2005	std84		0.100819		obesity	Observed
Finland	FIN	Men	2006	std84		0.102919		obesity	Observed
Finland	FIN	Men	2007	std84		0.104999		obesity	Observed
Finland	FIN	Men	2008	std84		0.107074		obesity	Observed
Finland	FIN	Men	2009	std84		0.109149		obesity	Observed
Finland	FIN	Men	2010	std84		0.111235		obesity	Observed
Finland	FIN	Men	2011	std84		0.113327		obesity	Observed
Finland	FIN	Men	2012	std84		0.115431		obesity	Observed
Finland	FIN	Men	2013	std84		0.11757		obesity	Observed
Finland	FIN	Men	2014	std84		0.119726		obesity	Observed
Finland	FIN	Men	2015	std84		0.121906		obesity	Observed
Finland	FIN	Men	2016	std84		0.124116		obesity	Observed
Finland	FIN	Men	2017	std84	0.126642	0.12675	0.126859	obesity	Projected
Finland	FIN	Men	2018	std84	0.128696	0.128945	0.129193	obesity	Projected
Finland	FIN	Men	2019	std84	0.13067	0.131096	0.131521	obesity	Projected
Finland	FIN	Men	2020	std84	0.132564	0.133196	0.133836	obesity	Projected
Finland	FIN	Men	2021	std84	0.13437	0.135244	0.136125	obesity	Projected
Finland	FIN	Men	2022	std84	0.136089	0.137226	0.138383	obesity	Projected
Finland	FIN	Men	2023	std84	0.137704	0.139146	0.140608	obesity	Projected
Finland	FIN	Men	2024	std84	0.139231	0.140996	0.142783	obesity	Projected
Finland	FIN	Men	2025	std84	0.140647	0.142769	0.144914	obesity	Projected
Finland	FIN	Men	2026	std84	0.141962	0.144461	0.146997	obesity	Projected
Finland	FIN	Men	2027	std84	0.143177	0.146072	0.14902	obesity	Projected
Finland	FIN	Men	2028	std84	0.144286	0.14759	0.150989	obesity	Projected
Finland	FIN	Men	2029	std84	0.145278	0.149021	0.152868	obesity	Projected
Finland	FIN	Men	2030	std84	0.146149	0.150351	0.154682	obesity	Projected
Finland	FIN	Men	2031	std84	0.146892	0.151577	0.156427	obesity	Projected
Finland	FIN	Men	2032	std84	0.147517	0.152706	0.158095	obesity	Projected
Finland	FIN	Men	2033	std84	0.148026	0.153726	0.15968	obesity	Projected
Finland	FIN	Men	2034	std84	0.148408	0.154648	0.161158	obesity	Projected
Finland	FIN	Men	2035	std84	0.148686	0.155453	0.162536	obesity	Projected
Finland	FIN	Men	2036	std84	0.148806	0.156149	0.163814	obesity	Projected
Finland	FIN	Men	2037	std84	0.14881	0.156732	0.165019	obesity	Projected
Finland	FIN	Men	2038	std84	0.148718	0.157203	0.16611	obesity	Projected
Finland	FIN	Men	2039	std84	0.148492	0.157562	0.167118	obesity	Projected
Finland	FIN	Men	2040	std84	0.148151	0.157799	0.168002	obesity	Projected
Finland	FIN	Men	2041	std84	0.14766	0.157917	0.168785	obesity	Projected
Finland	FIN	Men	2042	std84	0.147061	0.157908	0.169432	obesity	Projected
Finland	FIN	Men	2043	std84	0.14641	0.157792	0.169982	obesity	Projected
Finland	FIN	Men	2044	std84	0.145568	0.157558	0.170405	obesity	Projected
Finland	FIN	Men	2045	std84	0.144646	0.157217	0.170767	obesity	Projected
Finland	FIN	Men	2046	std84	0.143607	0.156748	0.170974	obesity	Projected
Finland	FIN	Men	2047	std84	0.142463	0.156173	0.171063	obesity	Projected
Finland	FIN	Men	2048	std84	0.141197	0.155471	0.171069	obesity	Projected
Finland	FIN	Men	2049	std84	0.139853	0.154668	0.170946	obesity	Projected
Finland	FIN	Men	2050	std84	0.138438	0.153747	0.170673	obesity	Projected
Finland	FIN	Men	2051	std84	0.136925	0.152732	0.170315	obesity	Projected
Finland	FIN	Men	2052	std84	0.13533	0.151593	0.169852	obesity	Projected
Finland	FIN	Men	2053	std84	0.13367	0.15038	0.169286	obesity	Projected
Finland	FIN	Men	2054	std84	0.13191	0.14906	0.168551	obesity	Projected
Finland	FIN	Men	2055	std84	0.130078	0.147622	0.167752	obesity	Projected
Finland	FIN	Men	2056	std84	0.128168	0.146095	0.166824	obesity	Projected
Finland	FIN	Men	2057	std84	0.126215	0.144484	0.165803	obesity	Projected
Finland	FIN	Men	2058	std84	0.124193	0.142804	0.164698	obesity	Projected
Finland	FIN	Men	2059	std84	0.122101	0.141027	0.16347	obesity	Projected
Finland	FIN	Men	2060	std84	0.119971	0.139179	0.162059	obesity	Projected
Finland	FIN	Men	2061	std84	0.117836	0.137249	0.160643	obesity	Projected
Finland	FIN	Men	2062	std84	0.115655	0.135271	0.159069	obesity	Projected
Finland	FIN	Men	2063	std84	0.113457	0.133224	0.157416	obesity	Projected
Finland	FIN	Men	2064	std84	0.111222	0.131124	0.155676	obesity	Projected
Finland	FIN	Men	2065	std84	0.109012	0.128963	0.153886	obesity	Projected
Finland		Men	1990	std84		0.419218		lifestyle (combined)	Observed
Finland		Men	1991	std84		0.39598		lifestyle (combined)	Observed
Finland		Men	1992	std84		0.412944		lifestyle (combined)	Observed
Finland		Men	1993	std84		0.404949		lifestyle (combined)	Observed
Finland		Men	1994	std84		0.391451		lifestyle (combined)	Observed
Finland		Men	1995	std84		0.394389		lifestyle (combined)	Observed
Finland		Men	1996	std84		0.393578		lifestyle (combined)	Observed
Finland		Men	1997	std84		0.382082		lifestyle (combined)	Observed
Finland		Men	1998	std84		0.38991		lifestyle (combined)	Observed
Finland		Men	1999	std84		0.377621		lifestyle (combined)	Observed
Finland		Men	2000	std84		0.37431		lifestyle (combined)	Observed
Finland		Men	2001	std84		0.375043		lifestyle (combined)	Observed
Finland		Men	2002	std84		0.371537		lifestyle (combined)	Observed
Finland		Men	2003	std84		0.377752		lifestyle (combined)	Observed
Finland		Men	2004	std84		0.373541		lifestyle (combined)	Observed
Finland		Men	2005	std84		0.377226		lifestyle (combined)	Observed
Finland		Men	2006	std84		0.373917		lifestyle (combined)	Observed
Finland		Men	2007	std84		0.372829		lifestyle (combined)	Observed
Finland		Men	2008	std84		0.368829		lifestyle (combined)	Observed
Finland		Men	2009	std84		0.369245		lifestyle (combined)	Observed
Finland		Men	2010	std84		0.377823		lifestyle (combined)	Observed
Finland		Men	2011	std84		0.366936		lifestyle (combined)	Observed
Finland		Men	2012	std84		0.36474		lifestyle (combined)	Observed
Finland		Men	2013	std84		0.367822		lifestyle (combined)	Observed
Finland		Men	2014	std84		0.350598		lifestyle (combined)	Observed
Finland		Men	2015	std84		0.354662		lifestyle (combined)	Observed
Finland		Men	2015	std84		0.354662		lifestyle (combined)	Projected
Finland		Men	2016	std84		0.346155		lifestyle (combined)	Projected
Finland		Men	2017	std84		0.341256		lifestyle (combined)	Projected
Finland		Men	2018	std84		0.338609		lifestyle (combined)	Projected
Finland		Men	2019	std84		0.336111		lifestyle (combined)	Projected
Finland		Men	2020	std84		0.333634		lifestyle (combined)	Projected
Finland		Men	2021	std84		0.331129		lifestyle (combined)	Projected
Finland		Men	2022	std84		0.328842		lifestyle (combined)	Projected
Finland		Men	2023	std84		0.326455		lifestyle (combined)	Projected
Finland		Men	2024	std84		0.324067		lifestyle (combined)	Projected
Finland		Men	2025	std84		0.32168		lifestyle (combined)	Projected
Finland		Men	2026	std84		0.318929		lifestyle (combined)	Projected
Finland		Men	2027	std84		0.316344		lifestyle (combined)	Projected
Finland		Men	2028	std84		0.313604		lifestyle (combined)	Projected
Finland		Men	2029	std84		0.311038		lifestyle (combined)	Projected
Finland		Men	2030	std84		0.308138		lifestyle (combined)	Projected
Finland		Men	2031	std84		0.305317		lifestyle (combined)	Projected
Finland		Men	2032	std84		0.302204		lifestyle (combined)	Projected
Finland		Men	2033	std84		0.298973		lifestyle (combined)	Projected
Finland		Men	2034	std84		0.295724		lifestyle (combined)	Projected
Finland		Men	2035	std84		0.292513		lifestyle (combined)	Projected
Finland		Men	2036	std84		0.289338		lifestyle (combined)	Projected
Finland		Men	2037	std84		0.28635		lifestyle (combined)	Projected
Finland		Men	2038	std84		0.283316		lifestyle (combined)	Projected
Finland		Men	2039	std84		0.28031		lifestyle (combined)	Projected
Finland		Men	2040	std84		0.27727		lifestyle (combined)	Projected
Finland		Men	2041	std84		0.274306		lifestyle (combined)	Projected
Finland		Men	2042	std84		0.271252		lifestyle (combined)	Projected
Finland		Men	2043	std84		0.2684		lifestyle (combined)	Projected
Finland		Men	2044	std84		0.265526		lifestyle (combined)	Projected
Finland		Men	2045	std84		0.262679		lifestyle (combined)	Projected
Finland		Men	2046	std84		0.259813		lifestyle (combined)	Projected
Finland		Men	2047	std84		0.257052		lifestyle (combined)	Projected
Finland		Men	2048	std84		0.254193		lifestyle (combined)	Projected
Finland		Men	2049	std84		0.251386		lifestyle (combined)	Projected
Finland		Men	2050	std84		0.248599		lifestyle (combined)	Projected
Finland		Men	2051	std84		0.245848		lifestyle (combined)	Projected
Finland		Men	2052	std84		0.243053		lifestyle (combined)	Projected
Finland		Men	2053	std84		0.240291		lifestyle (combined)	Projected
Finland		Men	2054	std84		0.237511		lifestyle (combined)	Projected
Finland		Men	2055	std84		0.234763		lifestyle (combined)	Projected
Finland		Men	2056	std84		0.232014		lifestyle (combined)	Projected
Finland		Men	2057	std84		0.22935		lifestyle (combined)	Projected
Finland		Men	2058	std84		0.226697		lifestyle (combined)	Projected
Finland		Men	2059	std84		0.224028		lifestyle (combined)	Projected
Finland		Men	2060	std84		0.221346		lifestyle (combined)	Projected
Finland		Men	2061	std84		0.218628		lifestyle (combined)	Projected
Finland		Men	2062	std84		0.21598		lifestyle (combined)	Projected
Finland		Men	2063	std84		0.213314		lifestyle (combined)	Projected
Finland		Men	2064	std84		0.210603		lifestyle (combined)	Projected
Finland		Men	2065	std84		0.2079		lifestyle (combined)	Projected
France	FRATNP	Men	1990	std84		0.311405		smoking	Observed
France	FRATNP	Men	1991	std84		0.313078		smoking	Observed
France	FRATNP	Men	1992	std84		0.312567		smoking	Observed
France	FRATNP	Men	1993	std84		0.313973		smoking	Observed
France	FRATNP	Men	1994	std84		0.309349		smoking	Observed
France	FRATNP	Men	1995	std84		0.31096		smoking	Observed
France	FRATNP	Men	1996	std84		0.308771		smoking	Observed
France	FRATNP	Men	1997	std84		0.306507		smoking	Observed
France	FRATNP	Men	1998	std84		0.305584		smoking	Observed
France	FRATNP	Men	1999	std84		0.303391		smoking	Observed
France	FRATNP	Men	2000	std84		0.297251		smoking	Observed
France	FRATNP	Men	2001	std84		0.294852		smoking	Observed
France	FRATNP	Men	2002	std84		0.292312		smoking	Observed
France	FRATNP	Men	2003	std84		0.28924		smoking	Observed
France	FRATNP	Men	2004	std84		0.288554		smoking	Observed
France	FRATNP	Men	2005	std84		0.288972		smoking	Observed
France	FRATNP	Men	2006	std84		0.2862		smoking	Observed
France	FRATNP	Men	2007	std84		0.281988		smoking	Observed
France	FRATNP	Men	2008	std84		0.276558		smoking	Observed
France	FRATNP	Men	2009	std84		0.275334		smoking	Observed
France	FRATNP	Men	2010	std84		0.269624		smoking	Observed
France	FRATNP	Men	2011	std84		0.267805		smoking	Observed
France	FRATNP	Men	2012	std84		0.261473		smoking	Observed
France	FRATNP	Men	2013	std84		0.256951		smoking	Observed
France	FRATNP	Men	2014	std84		0.255934		smoking	Observed
France	FRATNP	Men	2015	std84		0.254722		smoking	Observed
France	FRATNP	Men	2016	std84	0.236549	0.245611	0.254741	smoking	Projected
France	FRATNP	Men	2017	std84	0.229348	0.242104	0.25513	smoking	Projected
France	FRATNP	Men	2018	std84	0.222872	0.23855	0.254628	smoking	Projected
France	FRATNP	Men	2019	std84	0.216693	0.234769	0.253274	smoking	Projected
France	FRATNP	Men	2020	std84	0.210688	0.230855	0.251637	smoking	Projected
France	FRATNP	Men	2021	std84	0.204773	0.226712	0.249686	smoking	Projected
France	FRATNP	Men	2022	std84	0.198887	0.222446	0.247425	smoking	Projected
France	FRATNP	Men	2023	std84	0.193041	0.218106	0.244648	smoking	Projected
France	FRATNP	Men	2024	std84	0.187275	0.213565	0.241685	smoking	Projected
France	FRATNP	Men	2025	std84	0.181642	0.208896	0.23868	smoking	Projected
France	FRATNP	Men	2026	std84	0.175967	0.204153	0.235313	smoking	Projected
France	FRATNP	Men	2027	std84	0.170562	0.199467	0.231891	smoking	Projected
France	FRATNP	Men	2028	std84	0.164912	0.194514	0.228098	smoking	Projected
France	FRATNP	Men	2029	std84	0.159627	0.189573	0.223976	smoking	Projected
France	FRATNP	Men	2030	std84	0.15446	0.184654	0.219654	smoking	Projected
France	FRATNP	Men	2031	std84	0.149426	0.179735	0.215141	smoking	Projected
France	FRATNP	Men	2032	std84	0.144503	0.174677	0.210796	smoking	Projected
France	FRATNP	Men	2033	std84	0.139709	0.169823	0.206261	smoking	Projected
France	FRATNP	Men	2034	std84	0.135138	0.164864	0.201926	smoking	Projected
France	FRATNP	Men	2035	std84	0.130875	0.160123	0.197341	smoking	Projected
France	FRATNP	Men	2036	std84	0.126634	0.155277	0.192613	smoking	Projected
France	FRATNP	Men	2037	std84	0.122654	0.150512	0.187645	smoking	Projected
France	FRATNP	Men	2038	std84	0.118673	0.145944	0.182468	smoking	Projected
France	FRATNP	Men	2039	std84	0.115157	0.141607	0.177831	smoking	Projected
France	FRATNP	Men	2040	std84	0.111709	0.137381	0.173123	smoking	Projected
France	FRATNP	Men	2041	std84	0.108347	0.133255	0.168252	smoking	Projected
France	FRATNP	Men	2042	std84	0.105342	0.129342	0.163532	smoking	Projected
France	FRATNP	Men	2043	std84	0.10255	0.125617	0.158999	smoking	Projected
France	FRATNP	Men	2044	std84	0.0998787	0.122003	0.154755	smoking	Projected
France	FRATNP	Men	2045	std84	0.0973796	0.11867	0.150575	smoking	Projected
France	FRATNP	Men	2046	std84	0.0951404	0.115487	0.146564	smoking	Projected
France	FRATNP	Men	2047	std84	0.0929846	0.1124	0.142503	smoking	Projected
France	FRATNP	Men	2048	std84	0.090981	0.109533	0.139024	smoking	Projected
France	FRATNP	Men	2049	std84	0.0891243	0.106813	0.135386	smoking	Projected
France	FRATNP	Men	2050	std84	0.0875226	0.104324	0.132103	smoking	Projected
France	FRATNP	Men	2051	std84	0.0859106	0.101917	0.128584	smoking	Projected
France	FRATNP	Men	2052	std84	0.0844455	0.0996809	0.125698	smoking	Projected
France	FRATNP	Men	2053	std84	0.0831345	0.0975807	0.122626	smoking	Projected
France	FRATNP	Men	2054	std84	0.0818347	0.0956322	0.119844	smoking	Projected
France	FRATNP	Men	2055	std84	0.0806981	0.0937884	0.11701	smoking	Projected
France	FRATNP	Men	2056	std84	0.0795844	0.0920327	0.114479	smoking	Projected
France	FRATNP	Men	2057	std84	0.0786184	0.0903921	0.112032	smoking	Projected
France	FRATNP	Men	2058	std84	0.0777109	0.0888386	0.109585	smoking	Projected
France	FRATNP	Men	2059	std84	0.0768917	0.0873703	0.107277	smoking	Projected
France	FRATNP	Men	2060	std84	0.0760883	0.0860427	0.105131	smoking	Projected
France	FRATNP	Men	2061	std84	0.0753507	0.0847563	0.103114	smoking	Projected
France	FRATNP	Men	2062	std84	0.0746854	0.0835497	0.101171	smoking	Projected
France	FRATNP	Men	2063	std84	0.0740602	0.082415	0.0992866	smoking	Projected
France	FRATNP	Men	2064	std84	0.0734681	0.0813776	0.0974944	smoking	Projected
France	FRATNP	Men	2065	std84	0.0729379	0.0803906	0.0957589	smoking	Projected
France	FRATNP	Men	1990	std84		0.147013		alcohol	Observed
France	FRATNP	Men	1991	std84		0.143774		alcohol	Observed
France	FRATNP	Men	1992	std84		0.140663		alcohol	Observed
France	FRATNP	Men	1993	std84		0.138571		alcohol	Observed
France	FRATNP	Men	1994	std84		0.135948		alcohol	Observed
France	FRATNP	Men	1995	std84		0.132004		alcohol	Observed
France	FRATNP	Men	1996	std84		0.129112		alcohol	Observed
France	FRATNP	Men	1997	std84		0.128598		alcohol	Observed
France	FRATNP	Men	1998	std84		0.130581		alcohol	Observed
France	FRATNP	Men	1999	std84		0.129294		alcohol	Observed
France	FRATNP	Men	2000	std84		0.12775		alcohol	Observed
France	FRATNP	Men	2001	std84		0.127831		alcohol	Observed
France	FRATNP	Men	2002	std84		0.126931		alcohol	Observed
France	FRATNP	Men	2003	std84		0.125294		alcohol	Observed
France	FRATNP	Men	2004	std84		0.125083		alcohol	Observed
France	FRATNP	Men	2005	std84		0.12415		alcohol	Observed
France	FRATNP	Men	2006	std84		0.124492		alcohol	Observed
France	FRATNP	Men	2007	std84		0.124078		alcohol	Observed
France	FRATNP	Men	2008	std84		0.123305		alcohol	Observed
France	FRATNP	Men	2009	std84		0.123022		alcohol	Observed
France	FRATNP	Men	2010	std84		0.122706		alcohol	Observed
France	FRATNP	Men	2011	std84		0.122852		alcohol	Observed
France	FRATNP	Men	2012	std84		0.119537		alcohol	Observed
France	FRATNP	Men	2013	std84		0.117699		alcohol	Observed
France	FRATNP	Men	2014	std84		0.117014		alcohol	Observed
France	FRATNP	Men	2015	std84		0.113774		alcohol	Observed
France	FRATNP	Men	2016	std84	0.111104	0.112828	0.114579	alcohol	Projected
France	FRATNP	Men	2017	std84	0.109525	0.111948	0.114411	alcohol	Projected
France	FRATNP	Men	2018	std84	0.108152	0.11111	0.114123	alcohol	Projected
France	FRATNP	Men	2019	std84	0.106919	0.110303	0.113757	alcohol	Projected
France	FRATNP	Men	2020	std84	0.105791	0.109507	0.113383	alcohol	Projected
France	FRATNP	Men	2021	std84	0.104711	0.108745	0.112962	alcohol	Projected
France	FRATNP	Men	2022	std84	0.103683	0.108023	0.112592	alcohol	Projected
France	FRATNP	Men	2023	std84	0.102745	0.107322	0.112162	alcohol	Projected
France	FRATNP	Men	2024	std84	0.101809	0.106632	0.111734	alcohol	Projected
France	FRATNP	Men	2025	std84	0.100892	0.105957	0.111269	alcohol	Projected
France	FRATNP	Men	2026	std84	0.100063	0.105292	0.110819	alcohol	Projected
France	FRATNP	Men	2027	std84	0.0992462	0.104649	0.110399	alcohol	Projected
France	FRATNP	Men	2028	std84	0.0983673	0.104009	0.109984	alcohol	Projected
France	FRATNP	Men	2029	std84	0.0975838	0.103362	0.109521	alcohol	Projected
France	FRATNP	Men	2030	std84	0.0967831	0.102721	0.109068	alcohol	Projected
France	FRATNP	Men	2031	std84	0.0960087	0.102078	0.108595	alcohol	Projected
France	FRATNP	Men	2032	std84	0.0952175	0.101417	0.108116	alcohol	Projected
France	FRATNP	Men	2033	std84	0.0944247	0.100768	0.10764	alcohol	Projected
France	FRATNP	Men	2034	std84	0.0936309	0.100091	0.107112	alcohol	Projected
France	FRATNP	Men	2035	std84	0.0928231	0.0994025	0.106567	alcohol	Projected
France	FRATNP	Men	2036	std84	0.0920202	0.0986979	0.105972	alcohol	Projected
France	FRATNP	Men	2037	std84	0.0912136	0.0979794	0.10538	alcohol	Projected
France	FRATNP	Men	2038	std84	0.0903943	0.0972703	0.10475	alcohol	Projected
France	FRATNP	Men	2039	std84	0.0895392	0.0965547	0.104166	alcohol	Projected
France	FRATNP	Men	2040	std84	0.0887583	0.0958154	0.103503	alcohol	Projected
France	FRATNP	Men	2041	std84	0.0878742	0.0950809	0.102905	alcohol	Projected
France	FRATNP	Men	2042	std84	0.0870383	0.0943284	0.102219	alcohol	Projected
France	FRATNP	Men	2043	std84	0.0862163	0.0935647	0.101556	alcohol	Projected
France	FRATNP	Men	2044	std84	0.0853636	0.0928181	0.100878	alcohol	Projected
France	FRATNP	Men	2045	std84	0.0845043	0.0920364	0.100229	alcohol	Projected
France	FRATNP	Men	2046	std84	0.0836651	0.0912684	0.0995191	alcohol	Projected
France	FRATNP	Men	2047	std84	0.082796	0.090488	0.098851	alcohol	Projected
France	FRATNP	Men	2048	std84	0.0819686	0.0897188	0.0981735	alcohol	Projected
France	FRATNP	Men	2049	std84	0.0811167	0.0889413	0.0974337	alcohol	Projected
France	FRATNP	Men	2050	std84	0.0802979	0.088167	0.0967511	alcohol	Projected
France	FRATNP	Men	2051	std84	0.0794793	0.0873971	0.0960359	alcohol	Projected
France	FRATNP	Men	2052	std84	0.0786261	0.0866149	0.0952926	alcohol	Projected
France	FRATNP	Men	2053	std84	0.0778141	0.0858368	0.0946216	alcohol	Projected
France	FRATNP	Men	2054	std84	0.0769837	0.0850707	0.0939095	alcohol	Projected
France	FRATNP	Men	2055	std84	0.0761481	0.0842962	0.0932654	alcohol	Projected
France	FRATNP	Men	2056	std84	0.0753303	0.0835367	0.0925225	alcohol	Projected
France	FRATNP	Men	2057	std84	0.0745425	0.0827731	0.0918355	alcohol	Projected
France	FRATNP	Men	2058	std84	0.0737358	0.0820192	0.0911506	alcohol	Projected
France	FRATNP	Men	2059	std84	0.0729692	0.0812547	0.0904437	alcohol	Projected
France	FRATNP	Men	2060	std84	0.0721793	0.0805279	0.0897833	alcohol	Projected
France	FRATNP	Men	2061	std84	0.0714327	0.0798168	0.0890998	alcohol	Projected
France	FRATNP	Men	2062	std84	0.0707188	0.0791207	0.0884668	alcohol	Projected
France	FRATNP	Men	2063	std84	0.0699836	0.0784095	0.087751	alcohol	Projected
France	FRATNP	Men	2064	std84	0.0692808	0.0777208	0.0871334	alcohol	Projected
France	FRATNP	Men	2065	std84	0.0685605	0.0770387	0.0865217	alcohol	Projected
France	FRATNP	Men	1990	std84		0.06123		obesity	Observed
France	FRATNP	Men	1991	std84		0.0630404		obesity	Observed
France	FRATNP	Men	1992	std84		0.0648878		obesity	Observed
France	FRATNP	Men	1993	std84		0.0667736		obesity	Observed
France	FRATNP	Men	1994	std84		0.0686968		obesity	Observed
France	FRATNP	Men	1995	std84		0.0706507		obesity	Observed
France	FRATNP	Men	1996	std84		0.0726366		obesity	Observed
France	FRATNP	Men	1997	std84		0.0746488		obesity	Observed
France	FRATNP	Men	1998	std84		0.0766802		obesity	Observed
France	FRATNP	Men	1999	std84		0.078727		obesity	Observed
France	FRATNP	Men	2000	std84		0.0807801		obesity	Observed
France	FRATNP	Men	2001	std84		0.0828478		obesity	Observed
France	FRATNP	Men	2002	std84		0.084925		obesity	Observed
France	FRATNP	Men	2003	std84		0.0870092		obesity	Observed
France	FRATNP	Men	2004	std84		0.0891024		obesity	Observed
France	FRATNP	Men	2005	std84		0.0912005		obesity	Observed
France	FRATNP	Men	2006	std84		0.0933081		obesity	Observed
France	FRATNP	Men	2007	std84		0.0954202		obesity	Observed
France	FRATNP	Men	2008	std84		0.097538		obesity	Observed
France	FRATNP	Men	2009	std84		0.0996591		obesity	Observed
France	FRATNP	Men	2010	std84		0.101787		obesity	Observed
France	FRATNP	Men	2011	std84		0.103915		obesity	Observed
France	FRATNP	Men	2012	std84		0.106053		obesity	Observed
France	FRATNP	Men	2013	std84		0.108206		obesity	Observed
France	FRATNP	Men	2014	std84		0.110377		obesity	Observed
France	FRATNP	Men	2015	std84		0.112574		obesity	Observed
France	FRATNP	Men	2016	std84		0.114791		obesity	Observed
France	FRATNP	Men	2017	std84	0.117372	0.117457	0.117541	obesity	Projected
France	FRATNP	Men	2018	std84	0.119474	0.119667	0.119861	obesity	Projected
France	FRATNP	Men	2019	std84	0.121494	0.12183	0.122164	obesity	Projected
France	FRATNP	Men	2020	std84	0.123432	0.123934	0.124437	obesity	Projected
France	FRATNP	Men	2021	std84	0.125275	0.125972	0.126667	obesity	Projected
France	FRATNP	Men	2022	std84	0.127022	0.127936	0.128856	obesity	Projected
France	FRATNP	Men	2023	std84	0.128665	0.129822	0.130987	obesity	Projected
France	FRATNP	Men	2024	std84	0.130192	0.131621	0.133056	obesity	Projected
France	FRATNP	Men	2025	std84	0.131605	0.133323	0.135049	obesity	Projected
France	FRATNP	Men	2026	std84	0.132899	0.134926	0.136965	obesity	Projected
France	FRATNP	Men	2027	std84	0.134069	0.136424	0.138804	obesity	Projected
France	FRATNP	Men	2028	std84	0.13511	0.137806	0.140554	obesity	Projected
France	FRATNP	Men	2029	std84	0.136015	0.139075	0.142201	obesity	Projected
France	FRATNP	Men	2030	std84	0.136787	0.140217	0.143755	obesity	Projected
France	FRATNP	Men	2031	std84	0.137399	0.141233	0.145195	obesity	Projected
France	FRATNP	Men	2032	std84	0.137878	0.142119	0.14653	obesity	Projected
France	FRATNP	Men	2033	std84	0.138215	0.142866	0.147736	obesity	Projected
France	FRATNP	Men	2034	std84	0.138422	0.143474	0.148816	obesity	Projected
France	FRATNP	Men	2035	std84	0.138481	0.143946	0.149771	obesity	Projected
France	FRATNP	Men	2036	std84	0.13839	0.144286	0.150588	obesity	Projected
France	FRATNP	Men	2037	std84	0.138135	0.144473	0.151274	obesity	Projected
France	FRATNP	Men	2038	std84	0.137766	0.144519	0.151816	obesity	Projected
France	FRATNP	Men	2039	std84	0.137234	0.144426	0.152224	obesity	Projected
France	FRATNP	Men	2040	std84	0.136573	0.144191	0.152501	obesity	Projected
France	FRATNP	Men	2041	std84	0.135792	0.143808	0.152621	obesity	Projected
France	FRATNP	Men	2042	std84	0.134815	0.143288	0.152601	obesity	Projected
France	FRATNP	Men	2043	std84	0.133749	0.142631	0.152433	obesity	Projected
France	FRATNP	Men	2044	std84	0.132568	0.141838	0.152134	obesity	Projected
France	FRATNP	Men	2045	std84	0.131241	0.140929	0.151715	obesity	Projected
France	FRATNP	Men	2046	std84	0.129818	0.139865	0.151131	obesity	Projected
France	FRATNP	Men	2047	std84	0.128276	0.13869	0.150423	obesity	Projected
France	FRATNP	Men	2048	std84	0.126643	0.13737	0.149578	obesity	Projected
France	FRATNP	Men	2049	std84	0.124911	0.13595	0.148564	obesity	Projected
France	FRATNP	Men	2050	std84	0.123086	0.134417	0.147444	obesity	Projected
France	FRATNP	Men	2051	std84	0.121182	0.132768	0.146172	obesity	Projected
France	FRATNP	Men	2052	std84	0.119205	0.131041	0.144804	obesity	Projected
France	FRATNP	Men	2053	std84	0.117171	0.129214	0.143336	obesity	Projected
France	FRATNP	Men	2054	std84	0.115082	0.127302	0.14172	obesity	Projected
France	FRATNP	Men	2055	std84	0.112901	0.125306	0.140015	obesity	Projected
France	FRATNP	Men	2056	std84	0.110729	0.123249	0.138202	obesity	Projected
France	FRATNP	Men	2057	std84	0.10851	0.121122	0.136297	obesity	Projected
France	FRATNP	Men	2058	std84	0.106279	0.118951	0.134313	obesity	Projected
France	FRATNP	Men	2059	std84	0.104017	0.116734	0.132239	obesity	Projected
France	FRATNP	Men	2060	std84	0.10175	0.114473	0.130092	obesity	Projected
France	FRATNP	Men	2061	std84	0.0994876	0.11218	0.127887	obesity	Projected
France	FRATNP	Men	2062	std84	0.0972367	0.109859	0.125619	obesity	Projected
France	FRATNP	Men	2063	std84	0.0949602	0.107526	0.123313	obesity	Projected
France	FRATNP	Men	2064	std84	0.0927308	0.105185	0.120915	obesity	Projected
France	FRATNP	Men	2065	std84	0.0905297	0.102837	0.118555	obesity	Projected
France		Men	1990	std84		0.448602		lifestyle (combined)	Observed
France		Men	1991	std84		0.448918		lifestyle (combined)	Observed
France		Men	1992	std84		0.447595		lifestyle (combined)	Observed
France		Men	1993	std84		0.448498		lifestyle (combined)	Observed
France		Men	1994	std84		0.444237		lifestyle (combined)	Observed
France		Men	1995	std84		0.444171		lifestyle (combined)	Observed
France		Men	1996	std84		0.441743		lifestyle (combined)	Observed
France		Men	1997	std84		0.4408		lifestyle (combined)	Observed
France		Men	1998	std84		0.442556		lifestyle (combined)	Observed
France		Men	1999	std84		0.441209		lifestyle (combined)	Observed
France		Men	2000	std84		0.436543		lifestyle (combined)	Observed
France		Men	2001	std84		0.435944		lifestyle (combined)	Observed
France		Men	2002	std84		0.434611		lifestyle (combined)	Observed
France		Men	2003	std84		0.432388		lifestyle (combined)	Observed
France		Men	2004	std84		0.433006		lifestyle (combined)	Observed
France		Men	2005	std84		0.434042		lifestyle (combined)	Observed
France		Men	2006	std84		0.433374		lifestyle (combined)	Observed
France		Men	2007	std84		0.43109		lifestyle (combined)	Observed
France		Men	2008	std84		0.427624		lifestyle (combined)	Observed
France		Men	2009	std84		0.427819		lifestyle (combined)	Observed
France		Men	2010	std84		0.424466		lifestyle (combined)	Observed
France		Men	2011	std84		0.424495		lifestyle (combined)	Observed
France		Men	2012	std84		0.418715		lifestyle (combined)	Observed
France		Men	2013	std84		0.415346		lifestyle (combined)	Observed
France		Men	2014	std84		0.415518		lifestyle (combined)	Observed
France		Men	2015	std84		0.413868		lifestyle (combined)	Observed
France		Men	2015	std84		0.413868		lifestyle (combined)	Projected
France		Men	2016	std84		0.407554		lifestyle (combined)	Projected
France		Men	2017	std84		0.406003		lifestyle (combined)	Projected
France		Men	2018	std84		0.404151		lifestyle (combined)	Projected
France		Men	2019	std84		0.402121		lifestyle (combined)	Projected
France		Men	2020	std84		0.399966		lifestyle (combined)	Projected
France		Men	2021	std84		0.397623		lifestyle (combined)	Projected
France		Men	2022	std84		0.395172		lifestyle (combined)	Projected
France		Men	2023	std84		0.392634		lifestyle (combined)	Projected
France		Men	2024	std84		0.389898		lifestyle (combined)	Projected
France		Men	2025	std84		0.387016		lifestyle (combined)	Projected
France		Men	2026	std84		0.384024		lifestyle (combined)	Projected
France		Men	2027	std84		0.381025		lifestyle (combined)	Projected
France		Men	2028	std84		0.377748		lifestyle (combined)	Projected
France		Men	2029	std84		0.374401		lifestyle (combined)	Projected
France		Men	2030	std84		0.370989		lifestyle (combined)	Projected
France		Men	2031	std84		0.367489		lifestyle (combined)	Projected
France		Men	2032	std84		0.363777		lifestyle (combined)	Projected
France		Men	2033	std84		0.360131		lifestyle (combined)	Projected
France		Men	2034	std84		0.35628		lifestyle (combined)	Projected
France		Men	2035	std84		0.352488		lifestyle (combined)	Projected
France		Men	2036	std84		0.348502		lifestyle (combined)	Projected
France		Men	2037	std84		0.344447		lifestyle (combined)	Projected
France		Men	2038	std84		0.34044		lifestyle (combined)	Projected
France		Men	2039	std84		0.336493		lifestyle (combined)	Projected
France		Men	2040	std84		0.332498		lifestyle (combined)	Projected
France		Men	2041	std84		0.328459		lifestyle (combined)	Projected
France		Men	2042	std84		0.324457		lifestyle (combined)	Projected
France		Men	2043	std84		0.320473		lifestyle (combined)	Projected
France		Men	2044	std84		0.316472		lifestyle (combined)	Projected
France		Men	2045	std84		0.312558		lifestyle (combined)	Projected
France		Men	2046	std84		0.308637		lifestyle (combined)	Projected
France		Men	2047	std84		0.304679		lifestyle (combined)	Projected
France		Men	2048	std84		0.300774		lifestyle (combined)	Projected
France		Men	2049	std84		0.296883		lifestyle (combined)	Projected
France		Men	2050	std84		0.293072		lifestyle (combined)	Projected
France		Men	2051	std84		0.289222		lifestyle (combined)	Projected
France		Men	2052	std84		0.285422		lifestyle (combined)	Projected
France		Men	2053	std84		0.281638		lifestyle (combined)	Projected
France		Men	2054	std84		0.277902		lifestyle (combined)	Projected
France		Men	2055	std84		0.27416		lifestyle (combined)	Projected
France		Men	2056	std84		0.270439		lifestyle (combined)	Projected
France		Men	2057	std84		0.266737		lifestyle (combined)	Projected
France		Men	2058	std84		0.263065		lifestyle (combined)	Projected
France		Men	2059	std84		0.259404		lifestyle (combined)	Projected
France		Men	2060	std84		0.25584		lifestyle (combined)	Projected
France		Men	2061	std84		0.252285		lifestyle (combined)	Projected
France		Men	2062	std84		0.248774		lifestyle (combined)	Projected
France		Men	2063	std84		0.245291		lifestyle (combined)	Projected
France		Men	2064	std84		0.241889		lifestyle (combined)	Projected
France		Men	2065	std84		0.238521		lifestyle (combined)	Projected
Germany	DEUTNP	Men	1990	std84		0.308972		smoking	Observed
Germany	DEUTNP	Men	1991	std84		0.308863		smoking	Observed
Germany	DEUTNP	Men	1992	std84		0.306661		smoking	Observed
Germany	DEUTNP	Men	1993	std84		0.30745		smoking	Observed
Germany	DEUTNP	Men	1994	std84		0.300614		smoking	Observed
Germany	DEUTNP	Men	1995	std84		0.302259		smoking	Observed
Germany	DEUTNP	Men	1996	std84		0.293484		smoking	Observed
Germany	DEUTNP	Men	1997	std84		0.290262		smoking	Observed
Germany	DEUTNP	Men	1998	std84		0.287454		smoking	Observed
Germany	DEUTNP	Men	1999	std84		0.279157		smoking	Observed
Germany	DEUTNP	Men	2000	std84		0.280287		smoking	Observed
Germany	DEUTNP	Men	2001	std84		0.27085		smoking	Observed
Germany	DEUTNP	Men	2002	std84		0.267026		smoking	Observed
Germany	DEUTNP	Men	2003	std84		0.262003		smoking	Observed
Germany	DEUTNP	Men	2004	std84		0.257669		smoking	Observed
Germany	DEUTNP	Men	2005	std84		0.253947		smoking	Observed
Germany	DEUTNP	Men	2006	std84		0.248185		smoking	Observed
Germany	DEUTNP	Men	2007	std84		0.244803		smoking	Observed
Germany	DEUTNP	Men	2008	std84		0.244118		smoking	Observed
Germany	DEUTNP	Men	2009	std84		0.236977		smoking	Observed
Germany	DEUTNP	Men	2010	std84		0.231309		smoking	Observed
Germany	DEUTNP	Men	2011	std84		0.23136		smoking	Observed
Germany	DEUTNP	Men	2012	std84		0.229657		smoking	Observed
Germany	DEUTNP	Men	2013	std84		0.225265		smoking	Observed
Germany	DEUTNP	Men	2014	std84		0.220535		smoking	Observed
Germany	DEUTNP	Men	2015	std84		0.217118		smoking	Observed
Germany	DEUTNP	Men	2016	std84	0.198111	0.206459	0.215013	smoking	Projected
Germany	DEUTNP	Men	2017	std84	0.193454	0.201799	0.210523	smoking	Projected
Germany	DEUTNP	Men	2018	std84	0.188775	0.197194	0.20593	smoking	Projected
Germany	DEUTNP	Men	2019	std84	0.184185	0.192566	0.201224	smoking	Projected
Germany	DEUTNP	Men	2020	std84	0.179534	0.187943	0.196688	smoking	Projected
Germany	DEUTNP	Men	2021	std84	0.175053	0.183387	0.192101	smoking	Projected
Germany	DEUTNP	Men	2022	std84	0.170552	0.178876	0.187634	smoking	Projected
Germany	DEUTNP	Men	2023	std84	0.166091	0.174402	0.183014	smoking	Projected
Germany	DEUTNP	Men	2024	std84	0.161839	0.170007	0.178496	smoking	Projected
Germany	DEUTNP	Men	2025	std84	0.157604	0.16567	0.174215	smoking	Projected
Germany	DEUTNP	Men	2026	std84	0.153496	0.161422	0.16984	smoking	Projected
Germany	DEUTNP	Men	2027	std84	0.149475	0.157289	0.165582	smoking	Projected
Germany	DEUTNP	Men	2028	std84	0.145482	0.153222	0.161418	smoking	Projected
Germany	DEUTNP	Men	2029	std84	0.14172	0.149343	0.157378	smoking	Projected
Germany	DEUTNP	Men	2030	std84	0.138021	0.145482	0.153424	smoking	Projected
Germany	DEUTNP	Men	2031	std84	0.134582	0.141806	0.149478	smoking	Projected
Germany	DEUTNP	Men	2032	std84	0.131087	0.138182	0.145833	smoking	Projected
Germany	DEUTNP	Men	2033	std84	0.127825	0.134735	0.14226	smoking	Projected
Germany	DEUTNP	Men	2034	std84	0.124604	0.131363	0.138738	smoking	Projected
Germany	DEUTNP	Men	2035	std84	0.121563	0.128138	0.135315	smoking	Projected
Germany	DEUTNP	Men	2036	std84	0.11849	0.124983	0.132023	smoking	Projected
Germany	DEUTNP	Men	2037	std84	0.115705	0.121927	0.128781	smoking	Projected
Germany	DEUTNP	Men	2038	std84	0.112957	0.119041	0.125732	smoking	Projected
Germany	DEUTNP	Men	2039	std84	0.110381	0.116251	0.122784	smoking	Projected
Germany	DEUTNP	Men	2040	std84	0.107828	0.11353	0.119887	smoking	Projected
Germany	DEUTNP	Men	2041	std84	0.105389	0.110952	0.117027	smoking	Projected
Germany	DEUTNP	Men	2042	std84	0.103083	0.108471	0.114452	smoking	Projected
Germany	DEUTNP	Men	2043	std84	0.100938	0.106117	0.111938	smoking	Projected
Germany	DEUTNP	Men	2044	std84	0.0987967	0.103883	0.10955	smoking	Projected
Germany	DEUTNP	Men	2045	std84	0.0968562	0.101751	0.107283	smoking	Projected
Germany	DEUTNP	Men	2046	std84	0.0949833	0.0997067	0.105092	smoking	Projected
Germany	DEUTNP	Men	2047	std84	0.0931671	0.0977664	0.102964	smoking	Projected
Germany	DEUTNP	Men	2048	std84	0.0914666	0.0959159	0.101033	smoking	Projected
Germany	DEUTNP	Men	2049	std84	0.0898709	0.0941604	0.0991517	smoking	Projected
Germany	DEUTNP	Men	2050	std84	0.0883413	0.0925099	0.0972636	smoking	Projected
Germany	DEUTNP	Men	2051	std84	0.0869024	0.0909355	0.0955833	smoking	Projected
Germany	DEUTNP	Men	2052	std84	0.0855619	0.0894409	0.0940133	smoking	Projected
Germany	DEUTNP	Men	2053	std84	0.0842607	0.088043	0.0924111	smoking	Projected
Germany	DEUTNP	Men	2054	std84	0.08305	0.0867302	0.091052	smoking	Projected
Germany	DEUTNP	Men	2055	std84	0.0819295	0.0854739	0.0896674	smoking	Projected
Germany	DEUTNP	Men	2056	std84	0.0808722	0.0842933	0.0883947	smoking	Projected
Germany	DEUTNP	Men	2057	std84	0.079865	0.0831729	0.0871174	smoking	Projected
Germany	DEUTNP	Men	2058	std84	0.0789214	0.0821245	0.085934	smoking	Projected
Germany	DEUTNP	Men	2059	std84	0.0780568	0.0811215	0.0848013	smoking	Projected
Germany	DEUTNP	Men	2060	std84	0.0771949	0.0801653	0.0837339	smoking	Projected
Germany	DEUTNP	Men	2061	std84	0.0764214	0.079255	0.0827083	smoking	Projected
Germany	DEUTNP	Men	2062	std84	0.0756585	0.0784021	0.0817437	smoking	Projected
Germany	DEUTNP	Men	2063	std84	0.0749474	0.0775834	0.0807915	smoking	Projected
Germany	DEUTNP	Men	2064	std84	0.0742642	0.0768121	0.0799337	smoking	Projected
Germany	DEUTNP	Men	2065	std84	0.0736563	0.0760792	0.0790925	smoking	Projected
Germany	DEUTNP	Men	1990	std84		0.0996859		alcohol	Observed
Germany	DEUTNP	Men	1991	std84		0.102302		alcohol	Observed
Germany	DEUTNP	Men	1992	std84		0.103955		alcohol	Observed
Germany	DEUTNP	Men	1993	std84		0.103181		alcohol	Observed
Germany	DEUTNP	Men	1994	std84		0.103303		alcohol	Observed
Germany	DEUTNP	Men	1995	std84		0.102035		alcohol	Observed
Germany	DEUTNP	Men	1996	std84		0.101763		alcohol	Observed
Germany	DEUTNP	Men	1997	std84		0.101786		alcohol	Observed
Germany	DEUTNP	Men	1998	std84		0.100477		alcohol	Observed
Germany	DEUTNP	Men	1999	std84		0.0999771		alcohol	Observed
Germany	DEUTNP	Men	2000	std84		0.100199		alcohol	Observed
Germany	DEUTNP	Men	2001	std84		0.10038		alcohol	Observed
Germany	DEUTNP	Men	2002	std84		0.0999701		alcohol	Observed
Germany	DEUTNP	Men	2003	std84		0.0996589		alcohol	Observed
Germany	DEUTNP	Men	2004	std84		0.100239		alcohol	Observed
Germany	DEUTNP	Men	2005	std84		0.100043		alcohol	Observed
Germany	DEUTNP	Men	2006	std84		0.0994662		alcohol	Observed
Germany	DEUTNP	Men	2007	std84		0.0975502		alcohol	Observed
Germany	DEUTNP	Men	2008	std84		0.0961626		alcohol	Observed
Germany	DEUTNP	Men	2009	std84		0.0949589		alcohol	Observed
Germany	DEUTNP	Men	2010	std84		0.0943221		alcohol	Observed
Germany	DEUTNP	Men	2011	std84		0.0949043		alcohol	Observed
Germany	DEUTNP	Men	2012	std84		0.0950728		alcohol	Observed
Germany	DEUTNP	Men	2013	std84		0.0951423		alcohol	Observed
Germany	DEUTNP	Men	2014	std84		0.0960728		alcohol	Observed
Germany	DEUTNP	Men	2015	std84		0.095458		alcohol	Observed
Germany	DEUTNP	Men	2016	std84	0.0934813	0.0940853	0.094698	alcohol	Projected
Germany	DEUTNP	Men	2017	std84	0.0928364	0.0938392	0.0948451	alcohol	Projected
Germany	DEUTNP	Men	2018	std84	0.0922767	0.0936023	0.0949325	alcohol	Projected
Germany	DEUTNP	Men	2019	std84	0.0917692	0.0933545	0.0949625	alcohol	Projected
Germany	DEUTNP	Men	2020	std84	0.0912939	0.0930955	0.0949161	alcohol	Projected
Germany	DEUTNP	Men	2021	std84	0.0908226	0.0928181	0.0948411	alcohol	Projected
Germany	DEUTNP	Men	2022	std84	0.0903619	0.0925383	0.0947433	alcohol	Projected
Germany	DEUTNP	Men	2023	std84	0.0899135	0.0922428	0.0946158	alcohol	Projected
Germany	DEUTNP	Men	2024	std84	0.0894835	0.091939	0.0944678	alcohol	Projected
Germany	DEUTNP	Men	2025	std84	0.0890395	0.0916306	0.0943075	alcohol	Projected
Germany	DEUTNP	Men	2026	std84	0.0886099	0.0913234	0.0941277	alcohol	Projected
Germany	DEUTNP	Men	2027	std84	0.0881837	0.0910148	0.0939366	alcohol	Projected
Germany	DEUTNP	Men	2028	std84	0.0877753	0.0907134	0.0937624	alcohol	Projected
Germany	DEUTNP	Men	2029	std84	0.0873759	0.090414	0.0935944	alcohol	Projected
Germany	DEUTNP	Men	2030	std84	0.0869764	0.0901225	0.0934156	alcohol	Projected
Germany	DEUTNP	Men	2031	std84	0.0866004	0.0898372	0.0932382	alcohol	Projected
Germany	DEUTNP	Men	2032	std84	0.08623	0.0895575	0.0930595	alcohol	Projected
Germany	DEUTNP	Men	2033	std84	0.0858896	0.0892925	0.0928983	alcohol	Projected
Germany	DEUTNP	Men	2034	std84	0.0855489	0.0890434	0.0927291	alcohol	Projected
Germany	DEUTNP	Men	2035	std84	0.085212	0.0888039	0.0925912	alcohol	Projected
Germany	DEUTNP	Men	2036	std84	0.0848909	0.0885838	0.0924557	alcohol	Projected
Germany	DEUTNP	Men	2037	std84	0.084595	0.0883769	0.0923213	alcohol	Projected
Germany	DEUTNP	Men	2038	std84	0.0843369	0.0881884	0.0922361	alcohol	Projected
Germany	DEUTNP	Men	2039	std84	0.0840914	0.0880144	0.0921347	alcohol	Projected
Germany	DEUTNP	Men	2040	std84	0.0838424	0.0878525	0.0920631	alcohol	Projected
Germany	DEUTNP	Men	2041	std84	0.0836377	0.087711	0.0920041	alcohol	Projected
Germany	DEUTNP	Men	2042	std84	0.0834228	0.0875914	0.0919761	alcohol	Projected
Germany	DEUTNP	Men	2043	std84	0.0832241	0.0874949	0.0919905	alcohol	Projected
Germany	DEUTNP	Men	2044	std84	0.0830586	0.0874037	0.0919832	alcohol	Projected
Germany	DEUTNP	Men	2045	std84	0.0829147	0.0873367	0.0920078	alcohol	Projected
Germany	DEUTNP	Men	2046	std84	0.0827848	0.0872803	0.0920828	alcohol	Projected
Germany	DEUTNP	Men	2047	std84	0.0826453	0.0872405	0.0921442	alcohol	Projected
Germany	DEUTNP	Men	2048	std84	0.0825382	0.087232	0.0922204	alcohol	Projected
Germany	DEUTNP	Men	2049	std84	0.0824355	0.0872297	0.0923215	alcohol	Projected
Germany	DEUTNP	Men	2050	std84	0.0823575	0.0872393	0.0924419	alcohol	Projected
Germany	DEUTNP	Men	2051	std84	0.0822733	0.0872778	0.0925895	alcohol	Projected
Germany	DEUTNP	Men	2052	std84	0.0822164	0.0873124	0.0927413	alcohol	Projected
Germany	DEUTNP	Men	2053	std84	0.0821797	0.0873808	0.0929122	alcohol	Projected
Germany	DEUTNP	Men	2054	std84	0.0821351	0.0874573	0.093146	alcohol	Projected
Germany	DEUTNP	Men	2055	std84	0.0820979	0.0875381	0.0933649	alcohol	Projected
Germany	DEUTNP	Men	2056	std84	0.0820664	0.0876275	0.0935777	alcohol	Projected
Germany	DEUTNP	Men	2057	std84	0.0820197	0.0877082	0.093805	alcohol	Projected
Germany	DEUTNP	Men	2058	std84	0.0819701	0.0877905	0.0940107	alcohol	Projected
Germany	DEUTNP	Men	2059	std84	0.0819068	0.08786	0.0942118	alcohol	Projected
Germany	DEUTNP	Men	2060	std84	0.0818587	0.0879278	0.0943992	alcohol	Projected
Germany	DEUTNP	Men	2061	std84	0.0818015	0.0879779	0.094598	alcohol	Projected
Germany	DEUTNP	Men	2062	std84	0.081693	0.088026	0.0948537	alcohol	Projected
Germany	DEUTNP	Men	2063	std84	0.0816173	0.0880718	0.0950548	alcohol	Projected
Germany	DEUTNP	Men	2064	std84	0.0815241	0.0881139	0.0952839	alcohol	Projected
Germany	DEUTNP	Men	2065	std84	0.0814305	0.0881379	0.0954597	alcohol	Projected
Germany	DEUTNP	Men	1990	std84		0.0711657		obesity	Observed
Germany	DEUTNP	Men	1991	std84		0.0732482		obesity	Observed
Germany	DEUTNP	Men	1992	std84		0.0753557		obesity	Observed
Germany	DEUTNP	Men	1993	std84		0.0774923		obesity	Observed
Germany	DEUTNP	Men	1994	std84		0.0796495		obesity	Observed
Germany	DEUTNP	Men	1995	std84		0.0818225		obesity	Observed
Germany	DEUTNP	Men	1996	std84		0.0839915		obesity	Observed
Germany	DEUTNP	Men	1997	std84		0.0861564		obesity	Observed
Germany	DEUTNP	Men	1998	std84		0.088303		obesity	Observed
Germany	DEUTNP	Men	1999	std84		0.0904313		obesity	Observed
Germany	DEUTNP	Men	2000	std84		0.0925422		obesity	Observed
Germany	DEUTNP	Men	2001	std84		0.094652		obesity	Observed
Germany	DEUTNP	Men	2002	std84		0.096763		obesity	Observed
Germany	DEUTNP	Men	2003	std84		0.0988837		obesity	Observed
Germany	DEUTNP	Men	2004	std84		0.101007		obesity	Observed
Germany	DEUTNP	Men	2005	std84		0.103124		obesity	Observed
Germany	DEUTNP	Men	2006	std84		0.105249		obesity	Observed
[truncated: 3,485 more rows]
