# Supplementary material for: Future life expectancy in Europe taking into account the impact of smoking, obesity, and alcohol
Source: eLife. 2021 Jul 6;10:e66590. doi: 10.7554/eLife.66590 (PMC8337079; doi:10.7554/eLife.66590)
Supplement: Figure 1—figure supplement 2—source data 1. [file elife-66590-fig1-figsupp2-data1.xlsx]

## Sheet: data
country	HMD_code	sex	year	age	lower95	median	upper95	lifestyle	method
Austria	AUT	Women	1990	std84		0.0700329		smoking	Observed
Austria	AUT	Women	1991	std84		0.0803877		smoking	Observed
Austria	AUT	Women	1992	std84		0.0790004		smoking	Observed
Austria	AUT	Women	1993	std84		0.078808		smoking	Observed
Austria	AUT	Women	1994	std84		0.084377		smoking	Observed
Austria	AUT	Women	1995	std84		0.0757921		smoking	Observed
Austria	AUT	Women	1996	std84		0.0859109		smoking	Observed
Austria	AUT	Women	1997	std84		0.0907618		smoking	Observed
Austria	AUT	Women	1998	std84		0.0879681		smoking	Observed
Austria	AUT	Women	1999	std84		0.0891884		smoking	Observed
Austria	AUT	Women	2000	std84		0.090816		smoking	Observed
Austria	AUT	Women	2001	std84		0.0863924		smoking	Observed
Austria	AUT	Women	2002	std84		0.0954457		smoking	Observed
Austria	AUT	Women	2003	std84		0.090851		smoking	Observed
Austria	AUT	Women	2004	std84		0.0955838		smoking	Observed
Austria	AUT	Women	2005	std84		0.0923797		smoking	Observed
Austria	AUT	Women	2006	std84		0.0961405		smoking	Observed
Austria	AUT	Women	2007	std84		0.111095		smoking	Observed
Austria	AUT	Women	2008	std84		0.110128		smoking	Observed
Austria	AUT	Women	2009	std84		0.103968		smoking	Observed
Austria	AUT	Women	2010	std84		0.120334		smoking	Observed
Austria	AUT	Women	2011	std84		0.118198		smoking	Observed
Austria	AUT	Women	2012	std84		0.127866		smoking	Observed
Austria	AUT	Women	2013	std84		0.121822		smoking	Observed
Austria	AUT	Women	2014	std84		0.136279		smoking	Observed
Austria	AUT	Women	2015	std84	0.120689	0.134655	0.149357	smoking	Projected
Austria	AUT	Women	2016	std84	0.114883	0.137802	0.162609	smoking	Projected
Austria	AUT	Women	2017	std84	0.111153	0.140987	0.173525	smoking	Projected
Austria	AUT	Women	2018	std84	0.108216	0.144064	0.183098	smoking	Projected
Austria	AUT	Women	2019	std84	0.105858	0.146808	0.191421	smoking	Projected
Austria	AUT	Women	2020	std84	0.104141	0.149618	0.199233	smoking	Projected
Austria	AUT	Women	2021	std84	0.102494	0.152541	0.206875	smoking	Projected
Austria	AUT	Women	2022	std84	0.101211	0.155276	0.213872	smoking	Projected
Austria	AUT	Women	2023	std84	0.0996917	0.157591	0.219587	smoking	Projected
Austria	AUT	Women	2024	std84	0.0978857	0.159899	0.224717	smoking	Projected
Austria	AUT	Women	2025	std84	0.0967207	0.162056	0.229295	smoking	Projected
Austria	AUT	Women	2026	std84	0.0955158	0.163927	0.233253	smoking	Projected
Austria	AUT	Women	2027	std84	0.0940977	0.165662	0.23723	smoking	Projected
Austria	AUT	Women	2028	std84	0.0926525	0.16699	0.240567	smoking	Projected
Austria	AUT	Women	2029	std84	0.0908819	0.168088	0.243611	smoking	Projected
Austria	AUT	Women	2030	std84	0.0891309	0.169069	0.246254	smoking	Projected
Austria	AUT	Women	2031	std84	0.0874627	0.169329	0.248243	smoking	Projected
Austria	AUT	Women	2032	std84	0.085945	0.16936	0.25005	smoking	Projected
Austria	AUT	Women	2033	std84	0.0845761	0.169175	0.251502	smoking	Projected
Austria	AUT	Women	2034	std84	0.0822546	0.168805	0.252863	smoking	Projected
Austria	AUT	Women	2035	std84	0.0801608	0.167834	0.253592	smoking	Projected
Austria	AUT	Women	2036	std84	0.0780901	0.167023	0.254141	smoking	Projected
Austria	AUT	Women	2037	std84	0.0757244	0.16557	0.254642	smoking	Projected
Austria	AUT	Women	2038	std84	0.0735895	0.163744	0.254799	smoking	Projected
Austria	AUT	Women	2039	std84	0.0713922	0.161473	0.254774	smoking	Projected
Austria	AUT	Women	2040	std84	0.0690964	0.158978	0.255041	smoking	Projected
Austria	AUT	Women	2041	std84	0.0669111	0.156085	0.25482	smoking	Projected
Austria	AUT	Women	2042	std84	0.064555	0.153101	0.254004	smoking	Projected
Austria	AUT	Women	2043	std84	0.0622552	0.149797	0.253189	smoking	Projected
Austria	AUT	Women	2044	std84	0.0598522	0.145956	0.252544	smoking	Projected
Austria	AUT	Women	2045	std84	0.058161	0.142425	0.251648	smoking	Projected
Austria	AUT	Women	2046	std84	0.0561868	0.138594	0.25072	smoking	Projected
Austria	AUT	Women	2047	std84	0.0542981	0.134208	0.249753	smoking	Projected
Austria	AUT	Women	2048	std84	0.0525733	0.129978	0.248053	smoking	Projected
Austria	AUT	Women	2049	std84	0.0511413	0.126207	0.246934	smoking	Projected
Austria	AUT	Women	2050	std84	0.0501634	0.122599	0.246128	smoking	Projected
Austria	AUT	Women	2051	std84	0.0488347	0.11874	0.24488	smoking	Projected
Austria	AUT	Women	2052	std84	0.0478141	0.115182	0.243622	smoking	Projected
Austria	AUT	Women	2053	std84	0.0468512	0.111813	0.242191	smoking	Projected
Austria	AUT	Women	2054	std84	0.0459054	0.108482	0.240839	smoking	Projected
Austria	AUT	Women	2055	std84	0.0450566	0.105338	0.2395	smoking	Projected
Austria	AUT	Women	2056	std84	0.0443542	0.101928	0.237301	smoking	Projected
Austria	AUT	Women	2057	std84	0.0436515	0.098651	0.236114	smoking	Projected
Austria	AUT	Women	2058	std84	0.0430403	0.0954351	0.23427	smoking	Projected
Austria	AUT	Women	2059	std84	0.0424822	0.0925224	0.232606	smoking	Projected
Austria	AUT	Women	2060	std84	0.0419703	0.0896357	0.230772	smoking	Projected
Austria	AUT	Women	2061	std84	0.0415667	0.0866956	0.229044	smoking	Projected
Austria	AUT	Women	2062	std84	0.0411451	0.0840099	0.227296	smoking	Projected
Austria	AUT	Women	2063	std84	0.0407339	0.081355	0.225062	smoking	Projected
Austria	AUT	Women	2064	std84	0.0403996	0.0788332	0.222701	smoking	Projected
Austria	AUT	Women	2065	std84	0.040085	0.076344	0.220882	smoking	Projected
Austria	AUT	Women	1990	std84		0.0352706		alcohol	Observed
Austria	AUT	Women	1991	std84		0.0350962		alcohol	Observed
Austria	AUT	Women	1992	std84		0.0353641		alcohol	Observed
Austria	AUT	Women	1993	std84		0.0358409		alcohol	Observed
Austria	AUT	Women	1994	std84		0.0360304		alcohol	Observed
Austria	AUT	Women	1995	std84		0.03611		alcohol	Observed
Austria	AUT	Women	1996	std84		0.0359268		alcohol	Observed
Austria	AUT	Women	1997	std84		0.0358412		alcohol	Observed
Austria	AUT	Women	1998	std84		0.0361181		alcohol	Observed
Austria	AUT	Women	1999	std84		0.0359325		alcohol	Observed
Austria	AUT	Women	2000	std84		0.0363355		alcohol	Observed
Austria	AUT	Women	2001	std84		0.0366786		alcohol	Observed
Austria	AUT	Women	2002	std84		0.0372776		alcohol	Observed
Austria	AUT	Women	2003	std84		0.037613		alcohol	Observed
Austria	AUT	Women	2004	std84		0.0380559		alcohol	Observed
Austria	AUT	Women	2005	std84		0.0378095		alcohol	Observed
Austria	AUT	Women	2006	std84		0.0374763		alcohol	Observed
Austria	AUT	Women	2007	std84		0.0373157		alcohol	Observed
Austria	AUT	Women	2008	std84		0.0370438		alcohol	Observed
Austria	AUT	Women	2009	std84		0.0361012		alcohol	Observed
Austria	AUT	Women	2010	std84		0.0361389		alcohol	Observed
Austria	AUT	Women	2011	std84		0.0364173		alcohol	Observed
Austria	AUT	Women	2012	std84		0.0351587		alcohol	Observed
Austria	AUT	Women	2013	std84		0.0349825		alcohol	Observed
Austria	AUT	Women	2014	std84		0.0352274		alcohol	Observed
Austria	AUT	Women	2015	std84	0.0346557	0.0356665	0.0367083	alcohol	Projected
Austria	AUT	Women	2016	std84	0.0341368	0.0355409	0.037037	alcohol	Projected
Austria	AUT	Women	2017	std84	0.0337008	0.0354134	0.0372314	alcohol	Projected
Austria	AUT	Women	2018	std84	0.0333106	0.0352656	0.0373602	alcohol	Projected
Austria	AUT	Women	2019	std84	0.0329385	0.0351052	0.0374585	alcohol	Projected
Austria	AUT	Women	2020	std84	0.0325988	0.0349479	0.037502	alcohol	Projected
Austria	AUT	Women	2021	std84	0.0322445	0.0347661	0.0375219	alcohol	Projected
Austria	AUT	Women	2022	std84	0.0318979	0.03457	0.0375217	alcohol	Projected
Austria	AUT	Women	2023	std84	0.0315459	0.0343761	0.0374635	alcohol	Projected
Austria	AUT	Women	2024	std84	0.0312288	0.0341716	0.0374325	alcohol	Projected
Austria	AUT	Women	2025	std84	0.0309268	0.0339601	0.0373681	alcohol	Projected
Austria	AUT	Women	2026	std84	0.0306168	0.0337379	0.0372733	alcohol	Projected
Austria	AUT	Women	2027	std84	0.0302938	0.0335154	0.0371527	alcohol	Projected
Austria	AUT	Women	2028	std84	0.0300011	0.0332844	0.0370802	alcohol	Projected
Austria	AUT	Women	2029	std84	0.0296893	0.0330591	0.0369377	alcohol	Projected
Austria	AUT	Women	2030	std84	0.0293938	0.0328179	0.0368195	alcohol	Projected
Austria	AUT	Women	2031	std84	0.0290988	0.0325861	0.0366879	alcohol	Projected
Austria	AUT	Women	2032	std84	0.0288109	0.0323429	0.0365496	alcohol	Projected
Austria	AUT	Women	2033	std84	0.0285081	0.0321065	0.0363928	alcohol	Projected
Austria	AUT	Women	2034	std84	0.0282162	0.0318641	0.0362236	alcohol	Projected
Austria	AUT	Women	2035	std84	0.0279254	0.031605	0.0360384	alcohol	Projected
Austria	AUT	Women	2036	std84	0.0276442	0.031357	0.0358082	alcohol	Projected
Austria	AUT	Women	2037	std84	0.0273522	0.0310992	0.0356002	alcohol	Projected
Austria	AUT	Women	2038	std84	0.0270648	0.0308327	0.0354082	alcohol	Projected
Austria	AUT	Women	2039	std84	0.0267821	0.0305638	0.0351641	alcohol	Projected
Austria	AUT	Women	2040	std84	0.0264939	0.0302915	0.034911	alcohol	Projected
Austria	AUT	Women	2041	std84	0.0262104	0.0300169	0.0346628	alcohol	Projected
Austria	AUT	Women	2042	std84	0.0259197	0.0297413	0.0344346	alcohol	Projected
Austria	AUT	Women	2043	std84	0.0256378	0.0294658	0.0342099	alcohol	Projected
Austria	AUT	Women	2044	std84	0.0253503	0.0291863	0.0339566	alcohol	Projected
Austria	AUT	Women	2045	std84	0.0250675	0.0289099	0.0336799	alcohol	Projected
Austria	AUT	Women	2046	std84	0.0247924	0.028626	0.0334049	alcohol	Projected
Austria	AUT	Women	2047	std84	0.0245194	0.0283406	0.0331463	alcohol	Projected
Austria	AUT	Women	2048	std84	0.0242461	0.0280627	0.0329084	alcohol	Projected
Austria	AUT	Women	2049	std84	0.0239878	0.027788	0.0326393	alcohol	Projected
Austria	AUT	Women	2050	std84	0.023696	0.0275065	0.0323415	alcohol	Projected
Austria	AUT	Women	2051	std84	0.0234304	0.0272304	0.0320938	alcohol	Projected
Austria	AUT	Women	2052	std84	0.0231794	0.0269512	0.0318118	alcohol	Projected
Austria	AUT	Women	2053	std84	0.0229255	0.0266838	0.0315622	alcohol	Projected
Austria	AUT	Women	2054	std84	0.022664	0.0264132	0.0312711	alcohol	Projected
Austria	AUT	Women	2055	std84	0.0224205	0.026149	0.030951	alcohol	Projected
Austria	AUT	Women	2056	std84	0.0221703	0.025888	0.0306869	alcohol	Projected
Austria	AUT	Women	2057	std84	0.0219123	0.0256252	0.0304169	alcohol	Projected
Austria	AUT	Women	2058	std84	0.0216827	0.0253679	0.030191	alcohol	Projected
Austria	AUT	Women	2059	std84	0.0214631	0.0251002	0.02991	alcohol	Projected
Austria	AUT	Women	2060	std84	0.0212025	0.0248472	0.0296302	alcohol	Projected
Austria	AUT	Women	2061	std84	0.020965	0.0245919	0.029375	alcohol	Projected
Austria	AUT	Women	2062	std84	0.0207469	0.0243424	0.0291183	alcohol	Projected
Austria	AUT	Women	2063	std84	0.0205145	0.0240984	0.0288469	alcohol	Projected
Austria	AUT	Women	2064	std84	0.0203101	0.023864	0.0285944	alcohol	Projected
Austria	AUT	Women	2065	std84	0.0201031	0.023629	0.0283489	alcohol	Projected
Austria	AUT	Women	1990	std84		0.0609452		obesity	Observed
Austria	AUT	Women	1991	std84		0.0621813		obesity	Observed
Austria	AUT	Women	1992	std84		0.0634336		obesity	Observed
Austria	AUT	Women	1993	std84		0.0646994		obesity	Observed
Austria	AUT	Women	1994	std84		0.0659825		obesity	Observed
Austria	AUT	Women	1995	std84		0.0672762		obesity	Observed
Austria	AUT	Women	1996	std84		0.0685807		obesity	Observed
Austria	AUT	Women	1997	std84		0.0698931		obesity	Observed
Austria	AUT	Women	1998	std84		0.0712089		obesity	Observed
Austria	AUT	Women	1999	std84		0.0725272		obesity	Observed
Austria	AUT	Women	2000	std84		0.0738435		obesity	Observed
Austria	AUT	Women	2001	std84		0.0751605		obesity	Observed
Austria	AUT	Women	2002	std84		0.0764724		obesity	Observed
Austria	AUT	Women	2003	std84		0.0777784		obesity	Observed
Austria	AUT	Women	2004	std84		0.0790791		obesity	Observed
Austria	AUT	Women	2005	std84		0.0803746		obesity	Observed
Austria	AUT	Women	2006	std84		0.0816644		obesity	Observed
Austria	AUT	Women	2007	std84		0.082952		obesity	Observed
Austria	AUT	Women	2008	std84		0.0842342		obesity	Observed
Austria	AUT	Women	2009	std84		0.0855138		obesity	Observed
Austria	AUT	Women	2010	std84		0.0867916		obesity	Observed
Austria	AUT	Women	2011	std84		0.0880725		obesity	Observed
Austria	AUT	Women	2012	std84		0.0893589		obesity	Observed
Austria	AUT	Women	2013	std84		0.0906585		obesity	Observed
Austria	AUT	Women	2014	std84		0.0919738		obesity	Observed
Austria	AUT	Women	2015	std84		0.0933037		obesity	Observed
Austria	AUT	Women	2016	std84		0.0946599		obesity	Observed
Austria	AUT	Women	2017	std84	0.096193	0.0962616	0.09633	obesity	Projected
Austria	AUT	Women	2018	std84	0.0974503	0.0976081	0.097767	obesity	Projected
Austria	AUT	Women	2019	std84	0.0986504	0.0989224	0.099194	obesity	Projected
Austria	AUT	Women	2020	std84	0.0997939	0.1002	0.100608	obesity	Projected
Austria	AUT	Women	2021	std84	0.100872	0.101436	0.102001	obesity	Projected
Austria	AUT	Women	2022	std84	0.101879	0.102624	0.103368	obesity	Projected
Austria	AUT	Women	2023	std84	0.102822	0.103763	0.104709	obesity	Projected
Austria	AUT	Women	2024	std84	0.103696	0.104844	0.106011	obesity	Projected
Austria	AUT	Women	2025	std84	0.104483	0.105865	0.107268	obesity	Projected
Austria	AUT	Women	2026	std84	0.105197	0.106826	0.108486	obesity	Projected
Austria	AUT	Women	2027	std84	0.105818	0.10772	0.109661	obesity	Projected
Austria	AUT	Women	2028	std84	0.106355	0.108537	0.110767	obesity	Projected
Austria	AUT	Women	2029	std84	0.106802	0.109281	0.111831	obesity	Projected
Austria	AUT	Women	2030	std84	0.107166	0.109948	0.112835	obesity	Projected
Austria	AUT	Women	2031	std84	0.107435	0.110534	0.113772	obesity	Projected
Austria	AUT	Women	2032	std84	0.107616	0.111035	0.114635	obesity	Projected
Austria	AUT	Women	2033	std84	0.107711	0.111452	0.115423	obesity	Projected
Austria	AUT	Women	2034	std84	0.107705	0.111781	0.116137	obesity	Projected
Austria	AUT	Women	2035	std84	0.107609	0.112027	0.116771	obesity	Projected
Austria	AUT	Women	2036	std84	0.107416	0.112178	0.117313	obesity	Projected
Austria	AUT	Women	2037	std84	0.107142	0.112234	0.117769	obesity	Projected
Austria	AUT	Women	2038	std84	0.106777	0.112205	0.118158	obesity	Projected
Austria	AUT	Women	2039	std84	0.10633	0.112087	0.118432	obesity	Projected
Austria	AUT	Women	2040	std84	0.105789	0.111875	0.118618	obesity	Projected
Austria	AUT	Women	2041	std84	0.105165	0.111575	0.118708	obesity	Projected
Austria	AUT	Women	2042	std84	0.104469	0.111188	0.118732	obesity	Projected
Austria	AUT	Women	2043	std84	0.103692	0.110714	0.118661	obesity	Projected
Austria	AUT	Women	2044	std84	0.102847	0.11015	0.118483	obesity	Projected
Austria	AUT	Women	2045	std84	0.101937	0.109513	0.118247	obesity	Projected
Austria	AUT	Women	2046	std84	0.100948	0.108792	0.117902	obesity	Projected
Austria	AUT	Women	2047	std84	0.099905	0.108003	0.11745	obesity	Projected
Austria	AUT	Women	2048	std84	0.0987967	0.107136	0.11693	obesity	Projected
Austria	AUT	Women	2049	std84	0.0976268	0.1062	0.116313	obesity	Projected
Austria	AUT	Women	2050	std84	0.0964376	0.105194	0.115647	obesity	Projected
Austria	AUT	Women	2051	std84	0.0951894	0.104131	0.114877	obesity	Projected
Austria	AUT	Women	2052	std84	0.0939271	0.103004	0.114037	obesity	Projected
Austria	AUT	Women	2053	std84	0.0926174	0.101837	0.113086	obesity	Projected
Austria	AUT	Women	2054	std84	0.0912817	0.100617	0.112097	obesity	Projected
Austria	AUT	Women	2055	std84	0.0899194	0.0993592	0.111016	obesity	Projected
Austria	AUT	Women	2056	std84	0.0885486	0.0980561	0.109888	obesity	Projected
Austria	AUT	Women	2057	std84	0.0871724	0.0967153	0.108697	obesity	Projected
Austria	AUT	Women	2058	std84	0.0857936	0.0953513	0.107468	obesity	Projected
Austria	AUT	Women	2059	std84	0.0844226	0.0939576	0.106214	obesity	Projected
Austria	AUT	Women	2060	std84	0.0830418	0.0925452	0.104865	obesity	Projected
Austria	AUT	Women	2061	std84	0.0816776	0.0911175	0.103518	obesity	Projected
Austria	AUT	Women	2062	std84	0.080293	0.0896806	0.102138	obesity	Projected
Austria	AUT	Women	2063	std84	0.0789273	0.0882377	0.100676	obesity	Projected
Austria	AUT	Women	2064	std84	0.0775749	0.0867891	0.0992236	obesity	Projected
Austria	AUT	Women	2065	std84	0.0762471	0.0853481	0.0977265	obesity	Projected
Austria		Women	1990	std84		0.157511		lifestyle (combined)	Observed
Austria		Women	1991	std84		0.167838		lifestyle (combined)	Observed
Austria		Women	1992	std84		0.167927		lifestyle (combined)	Observed
Austria		Women	1993	std84		0.169289		lifestyle (combined)	Observed
Austria		Women	1994	std84		0.175606		lifestyle (combined)	Observed
Austria		Women	1995	std84		0.169097		lifestyle (combined)	Observed
Austria		Women	1996	std84		0.179188		lifestyle (combined)	Observed
Austria		Women	1997	std84		0.184622		lifestyle (combined)	Observed
Austria		Women	1998	std84		0.183508		lifestyle (combined)	Observed
Austria		Women	1999	std84		0.185601		lifestyle (combined)	Observed
Austria		Women	2000	std84		0.18855		lifestyle (combined)	Observed
Austria		Women	2001	std84		0.186051		lifestyle (combined)	Observed
Austria		Women	2002	std84		0.19576		lifestyle (combined)	Observed
Austria		Women	2003	std84		0.193099		lifestyle (combined)	Observed
Austria		Women	2004	std84		0.198801		lifestyle (combined)	Observed
Austria		Women	2005	std84		0.196888		lifestyle (combined)	Observed
Austria		Women	2006	std84		0.201061		lifestyle (combined)	Observed
Austria		Women	2007	std84		0.21525		lifestyle (combined)	Observed
Austria		Women	2008	std84		0.215274		lifestyle (combined)	Observed
Austria		Women	2009	std84		0.210172		lifestyle (combined)	Observed
Austria		Women	2010	std84		0.225712		lifestyle (combined)	Observed
Austria		Women	2011	std84		0.225145		lifestyle (combined)	Observed
Austria		Women	2012	std84		0.233722		lifestyle (combined)	Observed
Austria		Women	2013	std84		0.229372		lifestyle (combined)	Observed
Austria		Women	2014	std84		0.243347		lifestyle (combined)	Observed
Austria		Women	2015	std84		0.243379		lifestyle (combined)	Projected
Austria		Women	2016	std84		0.24716		lifestyle (combined)	Projected
Austria		Women	2017	std84		0.251169		lifestyle (combined)	Projected
Austria		Women	2018	std84		0.254849		lifestyle (combined)	Projected
Austria		Women	2019	std84		0.258196		lifestyle (combined)	Projected
Austria		Women	2020	std84		0.261568		lifestyle (combined)	Projected
Austria		Women	2021	std84		0.264978		lifestyle (combined)	Projected
Austria		Women	2022	std84		0.26817		lifestyle (combined)	Projected
Austria		Women	2023	std84		0.270956		lifestyle (combined)	Projected
Austria		Women	2024	std84		0.273676		lifestyle (combined)	Projected
Austria		Women	2025	std84		0.276209		lifestyle (combined)	Projected
Austria		Women	2026	std84		0.278435		lifestyle (combined)	Projected
Austria		Women	2027	std84		0.280488		lifestyle (combined)	Projected
Austria		Women	2028	std84		0.282119		lifestyle (combined)	Projected
Austria		Women	2029	std84		0.283498		lifestyle (combined)	Projected
Austria		Women	2030	std84		0.284699		lifestyle (combined)	Projected
Austria		Women	2031	std84		0.285223		lifestyle (combined)	Projected
Austria		Women	2032	std84		0.285472		lifestyle (combined)	Projected
Austria		Women	2033	std84		0.285475		lifestyle (combined)	Projected
Austria		Women	2034	std84		0.285242		lifestyle (combined)	Projected
Austria		Women	2035	std84		0.284413		lifestyle (combined)	Projected
Austria		Women	2036	std84		0.283655		lifestyle (combined)	Projected
Austria		Women	2037	std84		0.282259		lifestyle (combined)	Projected
Austria		Women	2038	std84		0.280467		lifestyle (combined)	Projected
Austria		Women	2039	std84		0.278217		lifestyle (combined)	Projected
Austria		Women	2040	std84		0.275693		lifestyle (combined)	Projected
Austria		Women	2041	std84		0.27275		lifestyle (combined)	Projected
Austria		Women	2042	std84		0.269653		lifestyle (combined)	Projected
Austria		Women	2043	std84		0.266204		lifestyle (combined)	Projected
Austria		Women	2044	std84		0.26221		lifestyle (combined)	Projected
Austria		Women	2045	std84		0.258418		lifestyle (combined)	Projected
Austria		Women	2046	std84		0.254284		lifestyle (combined)	Projected
Austria		Women	2047	std84		0.249603		lifestyle (combined)	Projected
Austria		Women	2048	std84		0.244988		lifestyle (combined)	Projected
Austria		Women	2049	std84		0.240707		lifestyle (combined)	Projected
Austria		Women	2050	std84		0.236492		lifestyle (combined)	Projected
Austria		Women	2051	std84		0.232005		lifestyle (combined)	Projected
Austria		Women	2052	std84		0.227713		lifestyle (combined)	Projected
Austria		Women	2053	std84		0.22355		lifestyle (combined)	Projected
Austria		Women	2054	std84		0.219362		lifestyle (combined)	Projected
Austria		Women	2055	std84		0.215301		lifestyle (combined)	Projected
Austria		Women	2056	std84		0.210959		lifestyle (combined)	Projected
Austria		Women	2057	std84		0.206689		lifestyle (combined)	Projected
Austria		Women	2058	std84		0.202446		lifestyle (combined)	Projected
Austria		Women	2059	std84		0.198424		lifestyle (combined)	Projected
Austria		Women	2060	std84		0.194412		lifestyle (combined)	Projected
Austria		Women	2061	std84		0.190327		lifestyle (combined)	Projected
Austria		Women	2062	std84		0.186454		lifestyle (combined)	Projected
Austria		Women	2063	std84		0.182599		lifestyle (combined)	Projected
Austria		Women	2064	std84		0.178855		lifestyle (combined)	Projected
Austria		Women	2065	std84		0.175139		lifestyle (combined)	Projected
Belgium	BEL	Women	1990	std84		0.0524189		smoking	Observed
Belgium	BEL	Women	1991	std84		0.0591124		smoking	Observed
Belgium	BEL	Women	1992	std84		0.0686836		smoking	Observed
Belgium	BEL	Women	1993	std84		0.0659251		smoking	Observed
Belgium	BEL	Women	1994	std84		0.0694216		smoking	Observed
Belgium	BEL	Women	1995	std84		0.0714247		smoking	Observed
Belgium	BEL	Women	1996	std84		0.0716176		smoking	Observed
Belgium	BEL	Women	1997	std84		0.082008		smoking	Observed
Belgium	BEL	Women	1998	std84		0.075417		smoking	Observed
Belgium	BEL	Women	1999	std84		0.0727309		smoking	Observed
Belgium	BEL	Women	2000	std84		0.0807453		smoking	Observed
Belgium	BEL	Women	2001	std84		0.0761509		smoking	Observed
Belgium	BEL	Women	2002	std84		0.0814352		smoking	Observed
Belgium	BEL	Women	2003	std84		0.0877853		smoking	Observed
Belgium	BEL	Women	2004	std84		0.0919081		smoking	Observed
Belgium	BEL	Women	2005	std84		0.0976326		smoking	Observed
Belgium	BEL	Women	2006	std84		0.104324		smoking	Observed
Belgium	BEL	Women	2007	std84		0.106739		smoking	Observed
Belgium	BEL	Women	2008	std84		0.116359		smoking	Observed
Belgium	BEL	Women	2009	std84		0.112789		smoking	Observed
Belgium	BEL	Women	2010	std84		0.128537		smoking	Observed
Belgium	BEL	Women	2011	std84		0.132208		smoking	Observed
Belgium	BEL	Women	2012	std84		0.12213		smoking	Observed
Belgium	BEL	Women	2013	std84		0.137735		smoking	Observed
Belgium	BEL	Women	2014	std84		0.140941		smoking	Observed
Belgium	BEL	Women	2015	std84		0.139852		smoking	Observed
Belgium	BEL	Women	2016	std84	0.117574	0.138406	0.16063	smoking	Projected
Belgium	BEL	Women	2017	std84	0.11165	0.140602	0.172045	smoking	Projected
Belgium	BEL	Women	2018	std84	0.107453	0.142682	0.181569	smoking	Projected
Belgium	BEL	Women	2019	std84	0.103944	0.144572	0.189624	smoking	Projected
Belgium	BEL	Women	2020	std84	0.101457	0.1464	0.196714	smoking	Projected
Belgium	BEL	Women	2021	std84	0.0989841	0.148004	0.203091	smoking	Projected
Belgium	BEL	Women	2022	std84	0.0962693	0.149353	0.208307	smoking	Projected
Belgium	BEL	Women	2023	std84	0.0940964	0.150532	0.21288	smoking	Projected
Belgium	BEL	Women	2024	std84	0.0917893	0.15119	0.217266	smoking	Projected
Belgium	BEL	Women	2025	std84	0.0896101	0.151662	0.221143	smoking	Projected
Belgium	BEL	Women	2026	std84	0.0872711	0.152192	0.224608	smoking	Projected
Belgium	BEL	Women	2027	std84	0.0852996	0.15219	0.226968	smoking	Projected
Belgium	BEL	Women	2028	std84	0.0827619	0.152046	0.228899	smoking	Projected
Belgium	BEL	Women	2029	std84	0.0804458	0.151378	0.230301	smoking	Projected
Belgium	BEL	Women	2030	std84	0.0783393	0.150581	0.231732	smoking	Projected
Belgium	BEL	Women	2031	std84	0.0758899	0.149204	0.232995	smoking	Projected
Belgium	BEL	Women	2032	std84	0.0734455	0.147569	0.233996	smoking	Projected
Belgium	BEL	Women	2033	std84	0.0712407	0.145771	0.234377	smoking	Projected
Belgium	BEL	Women	2034	std84	0.0691327	0.143785	0.233896	smoking	Projected
Belgium	BEL	Women	2035	std84	0.0669041	0.141263	0.233472	smoking	Projected
Belgium	BEL	Women	2036	std84	0.0648823	0.13842	0.232964	smoking	Projected
Belgium	BEL	Women	2037	std84	0.0627929	0.135702	0.232366	smoking	Projected
Belgium	BEL	Women	2038	std84	0.060536	0.132311	0.230786	smoking	Projected
Belgium	BEL	Women	2039	std84	0.0587012	0.128919	0.229178	smoking	Projected
Belgium	BEL	Women	2040	std84	0.0564992	0.125311	0.227485	smoking	Projected
Belgium	BEL	Women	2041	std84	0.0547414	0.121407	0.225268	smoking	Projected
Belgium	BEL	Women	2042	std84	0.0527148	0.116973	0.223031	smoking	Projected
Belgium	BEL	Women	2043	std84	0.0509349	0.112219	0.220534	smoking	Projected
Belgium	BEL	Women	2044	std84	0.0490753	0.107404	0.217228	smoking	Projected
Belgium	BEL	Women	2045	std84	0.04756	0.102291	0.213865	smoking	Projected
Belgium	BEL	Women	2046	std84	0.046011	0.0973146	0.210644	smoking	Projected
Belgium	BEL	Women	2047	std84	0.0447116	0.092169	0.206589	smoking	Projected
Belgium	BEL	Women	2048	std84	0.043561	0.0872669	0.201849	smoking	Projected
Belgium	BEL	Women	2049	std84	0.0424969	0.0822856	0.197083	smoking	Projected
Belgium	BEL	Women	2050	std84	0.0414869	0.0770766	0.191953	smoking	Projected
Belgium	BEL	Women	2051	std84	0.0406223	0.0724999	0.186513	smoking	Projected
Belgium	BEL	Women	2052	std84	0.0398997	0.0681745	0.182338	smoking	Projected
Belgium	BEL	Women	2053	std84	0.0392496	0.0640937	0.176971	smoking	Projected
Belgium	BEL	Women	2054	std84	0.0386974	0.0603482	0.17134	smoking	Projected
Belgium	BEL	Women	2055	std84	0.0382743	0.0569408	0.166885	smoking	Projected
Belgium	BEL	Women	2056	std84	0.0378979	0.0541434	0.162565	smoking	Projected
Belgium	BEL	Women	2057	std84	0.0376208	0.0518135	0.159261	smoking	Projected
Belgium	BEL	Women	2058	std84	0.0373934	0.0498096	0.155998	smoking	Projected
Belgium	BEL	Women	2059	std84	0.0372018	0.0480763	0.15353	smoking	Projected
Belgium	BEL	Women	2060	std84	0.0370618	0.0465952	0.150765	smoking	Projected
Belgium	BEL	Women	2061	std84	0.036944	0.0453102	0.148663	smoking	Projected
Belgium	BEL	Women	2062	std84	0.0368476	0.0441704	0.146011	smoking	Projected
Belgium	BEL	Women	2063	std84	0.0367717	0.0432203	0.144585	smoking	Projected
Belgium	BEL	Women	2064	std84	0.0367129	0.042402	0.141626	smoking	Projected
Belgium	BEL	Women	2065	std84	0.0366651	0.0416623	0.139025	smoking	Projected
Belgium	BEL	Women	1990	std84		0.0298714		alcohol	Observed
Belgium	BEL	Women	1991	std84		0.0299392		alcohol	Observed
Belgium	BEL	Women	1992	std84		0.0304057		alcohol	Observed
Belgium	BEL	Women	1993	std84		0.0304167		alcohol	Observed
Belgium	BEL	Women	1994	std84		0.0308382		alcohol	Observed
Belgium	BEL	Women	1995	std84		0.0308469		alcohol	Observed
Belgium	BEL	Women	1996	std84		0.0307338		alcohol	Observed
Belgium	BEL	Women	1997	std84		0.0302067		alcohol	Observed
Belgium	BEL	Women	1998	std84		0.0295452		alcohol	Observed
Belgium	BEL	Women	1999	std84		0.0294072		alcohol	Observed
Belgium	BEL	Women	2000	std84		0.0295678		alcohol	Observed
Belgium	BEL	Women	2001	std84		0.0304144		alcohol	Observed
Belgium	BEL	Women	2002	std84		0.031727		alcohol	Observed
Belgium	BEL	Women	2003	std84		0.0334004		alcohol	Observed
Belgium	BEL	Women	2004	std84		0.0359318		alcohol	Observed
Belgium	BEL	Women	2005	std84		0.0367742		alcohol	Observed
Belgium	BEL	Women	2006	std84		0.0377807		alcohol	Observed
Belgium	BEL	Women	2007	std84		0.0385987		alcohol	Observed
Belgium	BEL	Women	2008	std84		0.0390088		alcohol	Observed
Belgium	BEL	Women	2009	std84		0.0392078		alcohol	Observed
Belgium	BEL	Women	2010	std84		0.0397971		alcohol	Observed
Belgium	BEL	Women	2011	std84		0.0403632		alcohol	Observed
Belgium	BEL	Women	2012	std84		0.0399437		alcohol	Observed
Belgium	BEL	Women	2013	std84		0.0398187		alcohol	Observed
Belgium	BEL	Women	2014	std84		0.0403196		alcohol	Observed
Belgium	BEL	Women	2015	std84		0.0403378		alcohol	Observed
Belgium	BEL	Women	2016	std84	0.0385068	0.0393699	0.0402465	alcohol	Projected
Belgium	BEL	Women	2017	std84	0.037414	0.0387428	0.0401425	alcohol	Projected
Belgium	BEL	Women	2018	std84	0.03627	0.037966	0.0397346	alcohol	Projected
Belgium	BEL	Women	2019	std84	0.0351128	0.0370476	0.0390956	alcohol	Projected
Belgium	BEL	Women	2020	std84	0.0338931	0.0360112	0.0382861	alcohol	Projected
Belgium	BEL	Women	2021	std84	0.0326125	0.0348854	0.0373381	alcohol	Projected
Belgium	BEL	Women	2022	std84	0.0313178	0.0336706	0.0362272	alcohol	Projected
Belgium	BEL	Women	2023	std84	0.0299653	0.0323849	0.0350277	alcohol	Projected
Belgium	BEL	Women	2024	std84	0.0285984	0.0310361	0.0337266	alcohol	Projected
Belgium	BEL	Women	2025	std84	0.0272339	0.0296449	0.0323209	alcohol	Projected
Belgium	BEL	Women	2026	std84	0.0258537	0.0282472	0.0309041	alcohol	Projected
Belgium	BEL	Women	2027	std84	0.0244993	0.0268268	0.0294465	alcohol	Projected
Belgium	BEL	Women	2028	std84	0.0231575	0.0254086	0.0279681	alcohol	Projected
Belgium	BEL	Women	2029	std84	0.0218474	0.0240166	0.0264918	alcohol	Projected
Belgium	BEL	Women	2030	std84	0.0205779	0.022647	0.0250357	alcohol	Projected
Belgium	BEL	Women	2031	std84	0.0193311	0.021316	0.0235812	alcohol	Projected
Belgium	BEL	Women	2032	std84	0.0181643	0.0200344	0.0221964	alcohol	Projected
Belgium	BEL	Women	2033	std84	0.0170594	0.018803	0.0208296	alcohol	Projected
Belgium	BEL	Women	2034	std84	0.016011	0.0176365	0.0195332	alcohol	Projected
Belgium	BEL	Women	2035	std84	0.0150321	0.01653	0.0182903	alcohol	Projected
Belgium	BEL	Women	2036	std84	0.0141216	0.0154984	0.0171339	alcohol	Projected
Belgium	BEL	Women	2037	std84	0.0132772	0.0145331	0.0160348	alcohol	Projected
Belgium	BEL	Women	2038	std84	0.012503	0.013644	0.0150061	alcohol	Projected
Belgium	BEL	Women	2039	std84	0.0117873	0.0128226	0.0140648	alcohol	Projected
Belgium	BEL	Women	2040	std84	0.0111443	0.0120705	0.0131905	alcohol	Projected
Belgium	BEL	Women	2041	std84	0.0105602	0.0113869	0.0123868	alcohol	Projected
Belgium	BEL	Women	2042	std84	0.0100346	0.0107704	0.0116631	alcohol	Projected
Belgium	BEL	Women	2043	std84	0.00956683	0.0102165	0.0110101	alcohol	Projected
Belgium	BEL	Women	2044	std84	0.00915444	0.00972137	0.010419	alcohol	Projected
Belgium	BEL	Women	2045	std84	0.00878412	0.0092814	0.00989398	alcohol	Projected
Belgium	BEL	Women	2046	std84	0.00846162	0.00889173	0.0094259	alcohol	Projected
Belgium	BEL	Women	2047	std84	0.00817774	0.00855039	0.00901778	alcohol	Projected
Belgium	BEL	Women	2048	std84	0.00793131	0.00825183	0.00865636	alcohol	Projected
Belgium	BEL	Women	2049	std84	0.00771728	0.00799201	0.00833927	alcohol	Projected
Belgium	BEL	Women	2050	std84	0.00753294	0.0077672	0.00806348	alcohol	Projected
Belgium	BEL	Women	2051	std84	0.00737597	0.00757432	0.00782552	alcohol	Projected
Belgium	BEL	Women	2052	std84	0.00724258	0.00740963	0.00762219	alcohol	Projected
Belgium	BEL	Women	2053	std84	0.00712949	0.0072694	0.00744803	alcohol	Projected
Belgium	BEL	Women	2054	std84	0.00703415	0.00715121	0.00730047	alcohol	Projected
Belgium	BEL	Women	2055	std84	0.00695446	0.00705132	0.00717642	alcohol	Projected
Belgium	BEL	Women	2056	std84	0.00688791	0.00696792	0.00707168	alcohol	Projected
Belgium	BEL	Women	2057	std84	0.00683264	0.00689833	0.00698352	alcohol	Projected
Belgium	BEL	Women	2058	std84	0.00678716	0.00684083	0.00691032	alcohol	Projected
Belgium	BEL	Women	2059	std84	0.00674982	0.00679356	0.00685068	alcohol	Projected
Belgium	BEL	Women	2060	std84	0.0067194	0.00675473	0.00680097	alcohol	Projected
Belgium	BEL	Women	2061	std84	0.00669479	0.0067231	0.00676057	alcohol	Projected
Belgium	BEL	Women	2062	std84	0.00667482	0.00669756	0.00672769	alcohol	Projected
Belgium	BEL	Women	2063	std84	0.00665879	0.00667693	0.00670087	alcohol	Projected
Belgium	BEL	Women	2064	std84	0.00664591	0.00666037	0.00667939	alcohol	Projected
Belgium	BEL	Women	2065	std84	0.00663578	0.00664715	0.0066623	alcohol	Projected
Belgium	BEL	Women	1990	std84		0.0897313		obesity	Observed
Belgium	BEL	Women	1991	std84		0.0907461		obesity	Observed
Belgium	BEL	Women	1992	std84		0.0917692		obesity	Observed
Belgium	BEL	Women	1993	std84		0.0927951		obesity	Observed
Belgium	BEL	Women	1994	std84		0.0938282		obesity	Observed
Belgium	BEL	Women	1995	std84		0.0948608		obesity	Observed
Belgium	BEL	Women	1996	std84		0.0958866		obesity	Observed
Belgium	BEL	Women	1997	std84		0.0969044		obesity	Observed
Belgium	BEL	Women	1998	std84		0.097911		obesity	Observed
Belgium	BEL	Women	1999	std84		0.0989014		obesity	Observed
Belgium	BEL	Women	2000	std84		0.099876		obesity	Observed
Belgium	BEL	Women	2001	std84		0.10084		obesity	Observed
Belgium	BEL	Women	2002	std84		0.101786		obesity	Observed
Belgium	BEL	Women	2003	std84		0.102712		obesity	Observed
Belgium	BEL	Women	2004	std84		0.103622		obesity	Observed
Belgium	BEL	Women	2005	std84		0.104512		obesity	Observed
Belgium	BEL	Women	2006	std84		0.10538		obesity	Observed
Belgium	BEL	Women	2007	std84		0.106226		obesity	Observed
Belgium	BEL	Women	2008	std84		0.107054		obesity	Observed
Belgium	BEL	Women	2009	std84		0.107872		obesity	Observed
Belgium	BEL	Women	2010	std84		0.108676		obesity	Observed
Belgium	BEL	Women	2011	std84		0.109478		obesity	Observed
Belgium	BEL	Women	2012	std84		0.11028		obesity	Observed
Belgium	BEL	Women	2013	std84		0.111084		obesity	Observed
Belgium	BEL	Women	2014	std84		0.111901		obesity	Observed
Belgium	BEL	Women	2015	std84		0.112731		obesity	Observed
Belgium	BEL	Women	2016	std84		0.113571		obesity	Observed
Belgium	BEL	Women	2017	std84	0.114547	0.114604	0.114661	obesity	Projected
Belgium	BEL	Women	2018	std84	0.1153	0.11543	0.115561	obesity	Projected
Belgium	BEL	Women	2019	std84	0.116005	0.116228	0.116453	obesity	Projected
Belgium	BEL	Women	2020	std84	0.116662	0.116995	0.117333	obesity	Projected
Belgium	BEL	Women	2021	std84	0.117268	0.117728	0.118194	obesity	Projected
Belgium	BEL	Women	2022	std84	0.117823	0.118424	0.119039	obesity	Projected
Belgium	BEL	Women	2023	std84	0.118325	0.119084	0.119855	obesity	Projected
Belgium	BEL	Women	2024	std84	0.118777	0.119703	0.120649	obesity	Projected
Belgium	BEL	Women	2025	std84	0.119172	0.120279	0.121417	obesity	Projected
Belgium	BEL	Women	2026	std84	0.119513	0.120812	0.122153	obesity	Projected
Belgium	BEL	Women	2027	std84	0.119797	0.121296	0.122852	obesity	Projected
Belgium	BEL	Women	2028	std84	0.120023	0.121732	0.123522	obesity	Projected
Belgium	BEL	Women	2029	std84	0.12019	0.122115	0.124154	obesity	Projected
Belgium	BEL	Women	2030	std84	0.120302	0.122451	0.124743	obesity	Projected
Belgium	BEL	Women	2031	std84	0.120349	0.122737	0.125292	obesity	Projected
Belgium	BEL	Women	2032	std84	0.120342	0.122969	0.125785	obesity	Projected
Belgium	BEL	Women	2033	std84	0.120274	0.123144	0.126236	obesity	Projected
Belgium	BEL	Women	2034	std84	0.120141	0.123266	0.126632	obesity	Projected
Belgium	BEL	Women	2035	std84	0.119947	0.123335	0.126986	obesity	Projected
Belgium	BEL	Women	2036	std84	0.119696	0.123342	0.127298	obesity	Projected
Belgium	BEL	Women	2037	std84	0.119396	0.123294	0.127553	obesity	Projected
Belgium	BEL	Women	2038	std84	0.119036	0.123195	0.127757	obesity	Projected
Belgium	BEL	Women	2039	std84	0.118636	0.123041	0.127894	obesity	Projected
Belgium	BEL	Women	2040	std84	0.118187	0.12283	0.127995	obesity	Projected
Belgium	BEL	Women	2041	std84	0.117676	0.122564	0.128055	obesity	Projected
Belgium	BEL	Women	2042	std84	0.11713	0.122251	0.128035	obesity	Projected
Belgium	BEL	Women	2043	std84	0.116543	0.12188	0.127965	obesity	Projected
Belgium	BEL	Women	2044	std84	0.115909	0.121463	0.127861	obesity	Projected
Belgium	BEL	Women	2045	std84	0.115222	0.120996	0.127691	obesity	Projected
Belgium	BEL	Women	2046	std84	0.114501	0.120474	0.127493	obesity	Projected
Belgium	BEL	Women	2047	std84	0.113747	0.11991	0.127198	obesity	Projected
Belgium	BEL	Women	2048	std84	0.112969	0.119313	0.126854	obesity	Projected
Belgium	BEL	Women	2049	std84	0.112155	0.118671	0.126455	obesity	Projected
Belgium	BEL	Women	2050	std84	0.111309	0.11799	0.126046	obesity	Projected
Belgium	BEL	Women	2051	std84	0.110447	0.117273	0.125573	obesity	Projected
Belgium	BEL	Women	2052	std84	0.109584	0.116518	0.125016	obesity	Projected
Belgium	BEL	Women	2053	std84	0.108677	0.115733	0.124423	obesity	Projected
Belgium	BEL	Women	2054	std84	0.107763	0.114916	0.123791	obesity	Projected
Belgium	BEL	Women	2055	std84	0.106827	0.11408	0.123108	obesity	Projected
Belgium	BEL	Women	2056	std84	0.105882	0.113209	0.122381	obesity	Projected
Belgium	BEL	Women	2057	std84	0.104942	0.112326	0.121643	obesity	Projected
Belgium	BEL	Women	2058	std84	0.104006	0.111414	0.120859	obesity	Projected
Belgium	BEL	Women	2059	std84	0.103064	0.110485	0.120049	obesity	Projected
Belgium	BEL	Women	2060	std84	0.102133	0.109552	0.119209	obesity	Projected
Belgium	BEL	Women	2061	std84	0.101212	0.108606	0.118348	obesity	Projected
Belgium	BEL	Women	2062	std84	0.100292	0.107648	0.117456	obesity	Projected
Belgium	BEL	Women	2063	std84	0.099379	0.106686	0.116559	obesity	Projected
Belgium	BEL	Women	2064	std84	0.0984755	0.105721	0.115613	obesity	Projected
Belgium	BEL	Women	2065	std84	0.0975721	0.104762	0.114643	obesity	Projected
Belgium		Women	1990	std84		0.163212		lifestyle (combined)	Observed
Belgium		Women	1991	std84		0.170107		lifestyle (combined)	Observed
Belgium		Women	1992	std84		0.179868		lifestyle (combined)	Observed
Belgium		Women	1993	std84		0.178378		lifestyle (combined)	Observed
Belgium		Women	1994	std84		0.182741		lifestyle (combined)	Observed
Belgium		Women	1995	std84		0.185437		lifestyle (combined)	Observed
Belgium		Women	1996	std84		0.186434		lifestyle (combined)	Observed
Belgium		Women	1997	std84		0.196008		lifestyle (combined)	Observed
Belgium		Women	1998	std84		0.190586		lifestyle (combined)	Observed
Belgium		Women	1999	std84		0.189011		lifestyle (combined)	Observed
Belgium		Women	2000	std84		0.197022		lifestyle (combined)	Observed
Belgium		Women	2001	std84		0.194577		lifestyle (combined)	Observed
Belgium		Women	2002	std84		0.201109		lifestyle (combined)	Observed
Belgium		Women	2003	std84		0.20882		lifestyle (combined)	Observed
Belgium		Women	2004	std84		0.215255		lifestyle (combined)	Observed
Belgium		Women	2005	std84		0.221657		lifestyle (combined)	Observed
Belgium		Women	2006	std84		0.228983		lifestyle (combined)	Observed
Belgium		Women	2007	std84		0.232443		lifestyle (combined)	Observed
Belgium		Women	2008	std84		0.241736		lifestyle (combined)	Observed
Belgium		Women	2009	std84		0.239528		lifestyle (combined)	Observed
Belgium		Women	2010	std84		0.254157		lifestyle (combined)	Observed
Belgium		Women	2011	std84		0.258405		lifestyle (combined)	Observed
Belgium		Women	2012	std84		0.25014		lifestyle (combined)	Observed
Belgium		Women	2013	std84		0.264039		lifestyle (combined)	Observed
Belgium		Women	2014	std84		0.267832		lifestyle (combined)	Observed
Belgium		Women	2015	std84		0.267602		lifestyle (combined)	Observed
Belgium		Women	2015	std84		0.267602		lifestyle (combined)	Projected
Belgium		Women	2016	std84		0.266326		lifestyle (combined)	Projected
Belgium		Women	2017	std84		0.268572		lifestyle (combined)	Projected
Belgium		Women	2018	std84		0.270434		lifestyle (combined)	Projected
Belgium		Women	2019	std84		0.272005		lifestyle (combined)	Projected
Belgium		Women	2020	std84		0.27341		lifestyle (combined)	Projected
Belgium		Women	2021	std84		0.27453		lifestyle (combined)	Projected
Belgium		Women	2022	std84		0.27534		lifestyle (combined)	Projected
Belgium		Women	2023	std84		0.275924		lifestyle (combined)	Projected
Belgium		Women	2024	std84		0.275986		lifestyle (combined)	Projected
Belgium		Women	2025	std84		0.275823		lifestyle (combined)	Projected
Belgium		Women	2026	std84		0.275673		lifestyle (combined)	Projected
Belgium		Women	2027	std84		0.275012		lifestyle (combined)	Projected
Belgium		Women	2028	std84		0.274191		lifestyle (combined)	Projected
Belgium		Women	2029	std84		0.2729		lifestyle (combined)	Projected
Belgium		Women	2030	std84		0.271475		lifestyle (combined)	Projected
Belgium		Women	2031	std84		0.269538		lifestyle (combined)	Projected
Belgium		Women	2032	std84		0.267369		lifestyle (combined)	Projected
Belgium		Women	2033	std84		0.265048		lifestyle (combined)	Projected
Belgium		Women	2034	std84		0.262567		lifestyle (combined)	Projected
Belgium		Women	2035	std84		0.259619		lifestyle (combined)	Projected
Belgium		Women	2036	std84		0.256394		lifestyle (combined)	Projected
Belgium		Women	2037	std84		0.253276		lifestyle (combined)	Projected
Belgium		Women	2038	std84		0.249586		lifestyle (combined)	Projected
Belgium		Women	2039	std84		0.245893		lifestyle (combined)	Projected
Belgium		Women	2040	std84		0.24201		lifestyle (combined)	Projected
Belgium		Women	2041	std84		0.237869		lifestyle (combined)	Projected
Belgium		Women	2042	std84		0.233272		lifestyle (combined)	Projected
Belgium		Women	2043	std84		0.228386		lifestyle (combined)	Projected
Belgium		Women	2044	std84		0.223445		lifestyle (combined)	Projected
Belgium		Women	2045	std84		0.218234		lifestyle (combined)	Projected
Belgium		Women	2046	std84		0.213124		lifestyle (combined)	Projected
Belgium		Women	2047	std84		0.207858		lifestyle (combined)	Projected
Belgium		Women	2048	std84		0.202801		lifestyle (combined)	Projected
Belgium		Women	2049	std84		0.197656		lifestyle (combined)	Projected
Belgium		Women	2050	std84		0.192295		lifestyle (combined)	Projected
Belgium		Women	2051	std84		0.187472		lifestyle (combined)	Projected
Belgium		Women	2052	std84		0.182849		lifestyle (combined)	Projected
Belgium		Women	2053	std84		0.178425		lifestyle (combined)	Projected
Belgium		Women	2054	std84		0.174277		lifestyle (combined)	Projected
Belgium		Women	2055	std84		0.170416		lifestyle (combined)	Projected
Belgium		Women	2056	std84		0.167068		lifestyle (combined)	Projected
Belgium		Women	2057	std84		0.164125		lifestyle (combined)	Projected
Belgium		Women	2058	std84		0.16145		lifestyle (combined)	Projected
Belgium		Women	2059	std84		0.159002		lifestyle (combined)	Projected
Belgium		Women	2060	std84		0.156777		lifestyle (combined)	Projected
Belgium		Women	2061	std84		0.154717		lifestyle (combined)	Projected
Belgium		Women	2062	std84		0.152776		lifestyle (combined)	Projected
Belgium		Women	2063	std84		0.151002		lifestyle (combined)	Projected
Belgium		Women	2064	std84		0.149344		lifestyle (combined)	Projected
Belgium		Women	2065	std84		0.147763		lifestyle (combined)	Projected
Czech Republic	CZE	Women	1990	std84		0.0724053		smoking	Observed
Czech Republic	CZE	Women	1991	std84		0.0849022		smoking	Observed
Czech Republic	CZE	Women	1992	std84		0.0832138		smoking	Observed
Czech Republic	CZE	Women	1993	std84		0.0833909		smoking	Observed
Czech Republic	CZE	Women	1994	std84		0.0960195		smoking	Observed
Czech Republic	CZE	Women	1995	std84		0.0975027		smoking	Observed
Czech Republic	CZE	Women	1996	std84		0.101124		smoking	Observed
Czech Republic	CZE	Women	1997	std84		0.0923495		smoking	Observed
Czech Republic	CZE	Women	1998	std84		0.104139		smoking	Observed
Czech Republic	CZE	Women	1999	std84		0.113066		smoking	Observed
Czech Republic	CZE	Women	2000	std84		0.113014		smoking	Observed
Czech Republic	CZE	Women	2001	std84		0.119252		smoking	Observed
Czech Republic	CZE	Women	2002	std84		0.115584		smoking	Observed
Czech Republic	CZE	Women	2003	std84		0.118155		smoking	Observed
Czech Republic	CZE	Women	2004	std84		0.116358		smoking	Observed
Czech Republic	CZE	Women	2005	std84		0.119199		smoking	Observed
Czech Republic	CZE	Women	2006	std84		0.125738		smoking	Observed
Czech Republic	CZE	Women	2007	std84		0.121921		smoking	Observed
Czech Republic	CZE	Women	2008	std84		0.126885		smoking	Observed
Czech Republic	CZE	Women	2009	std84		0.121087		smoking	Observed
Czech Republic	CZE	Women	2010	std84		0.132001		smoking	Observed
Czech Republic	CZE	Women	2011	std84		0.140929		smoking	Observed
Czech Republic	CZE	Women	2012	std84		0.145843		smoking	Observed
Czech Republic	CZE	Women	2013	std84		0.13843		smoking	Observed
Czech Republic	CZE	Women	2014	std84		0.13486		smoking	Observed
Czech Republic	CZE	Women	2015	std84		0.133247		smoking	Observed
Czech Republic	CZE	Women	2016	std84		0.133399		smoking	Observed
Czech Republic	CZE	Women	2017	std84	0.11843	0.127964	0.137829	smoking	Projected
Czech Republic	CZE	Women	2018	std84	0.112424	0.126209	0.140952	smoking	Projected
Czech Republic	CZE	Women	2019	std84	0.107824	0.12452	0.142969	smoking	Projected
Czech Republic	CZE	Women	2020	std84	0.103315	0.12248	0.143592	smoking	Projected
Czech Republic	CZE	Women	2021	std84	0.0990684	0.120025	0.143724	smoking	Projected
Czech Republic	CZE	Women	2022	std84	0.0949014	0.117277	0.142984	smoking	Projected
Czech Republic	CZE	Women	2023	std84	0.0909805	0.114336	0.141888	smoking	Projected
Czech Republic	CZE	Women	2024	std84	0.0868865	0.111075	0.140058	smoking	Projected
Czech Republic	CZE	Women	2025	std84	0.0830407	0.107656	0.137835	smoking	Projected
Czech Republic	CZE	Women	2026	std84	0.0792475	0.103873	0.135094	smoking	Projected
Czech Republic	CZE	Women	2027	std84	0.0755409	0.100019	0.131944	smoking	Projected
Czech Republic	CZE	Women	2028	std84	0.071874	0.0960245	0.128377	smoking	Projected
Czech Republic	CZE	Women	2029	std84	0.0684352	0.0919428	0.12451	smoking	Projected
Czech Republic	CZE	Women	2030	std84	0.0652089	0.0878289	0.120159	smoking	Projected
Czech Republic	CZE	Women	2031	std84	0.0620552	0.083572	0.115485	smoking	Projected
Czech Republic	CZE	Women	2032	std84	0.0590631	0.0793964	0.110589	smoking	Projected
Czech Republic	CZE	Women	2033	std84	0.0562133	0.0753699	0.105604	smoking	Projected
Czech Republic	CZE	Women	2034	std84	0.0535922	0.0714127	0.100482	smoking	Projected
Czech Republic	CZE	Women	2035	std84	0.0511721	0.0675553	0.0953107	smoking	Projected
Czech Republic	CZE	Women	2036	std84	0.0489054	0.0638705	0.0901524	smoking	Projected
Czech Republic	CZE	Women	2037	std84	0.0468674	0.0604159	0.0852446	smoking	Projected
Czech Republic	CZE	Women	2038	std84	0.0451122	0.0571325	0.079979	smoking	Projected
Czech Republic	CZE	Women	2039	std84	0.0435207	0.0541446	0.0751284	smoking	Projected
Czech Republic	CZE	Women	2040	std84	0.0421066	0.0513795	0.0704356	smoking	Projected
Czech Republic	CZE	Women	2041	std84	0.0408839	0.0488916	0.0660509	smoking	Projected
Czech Republic	CZE	Women	2042	std84	0.0398008	0.0466552	0.0618372	smoking	Projected
Czech Republic	CZE	Women	2043	std84	0.0389109	0.0447002	0.0580959	smoking	Projected
Czech Republic	CZE	Women	2044	std84	0.038145	0.0429958	0.0545996	smoking	Projected
Czech Republic	CZE	Women	2045	std84	0.0375146	0.0415312	0.0514299	smoking	Projected
Czech Republic	CZE	Women	2046	std84	0.036995	0.0402667	0.0486739	smoking	Projected
Czech Republic	CZE	Women	2047	std84	0.0365589	0.0391815	0.046146	smoking	Projected
Czech Republic	CZE	Women	2048	std84	0.0361955	0.038271	0.0439859	smoking	Projected
Czech Republic	CZE	Women	2049	std84	0.0359045	0.0375209	0.0421755	smoking	Projected
Czech Republic	CZE	Women	2050	std84	0.0356823	0.0369313	0.0407269	smoking	Projected
Czech Republic	CZE	Women	2051	std84	0.0355093	0.0364635	0.0395476	smoking	Projected
Czech Republic	CZE	Women	2052	std84	0.0353784	0.036097	0.0385899	smoking	Projected
Czech Republic	CZE	Women	2053	std84	0.035288	0.0358385	0.0379177	smoking	Projected
Czech Republic	CZE	Women	2054	std84	0.0352208	0.0356472	0.0374095	smoking	Projected
Czech Republic	CZE	Women	2055	std84	0.0351744	0.0355054	0.0370257	smoking	Projected
Czech Republic	CZE	Women	2056	std84	0.0351399	0.0354004	0.0367285	smoking	Projected
Czech Republic	CZE	Women	2057	std84	0.0351157	0.0353215	0.0364908	smoking	Projected
Czech Republic	CZE	Women	2058	std84	0.0350986	0.035262	0.0363024	smoking	Projected
Czech Republic	CZE	Women	2059	std84	0.0350866	0.0352159	0.0361375	smoking	Projected
Czech Republic	CZE	Women	2060	std84	0.0350783	0.0351808	0.0360072	smoking	Projected
Czech Republic	CZE	Women	2061	std84	0.0350726	0.0351534	0.0358856	smoking	Projected
Czech Republic	CZE	Women	2062	std84	0.0350685	0.0351328	0.0357756	smoking	Projected
Czech Republic	CZE	Women	2063	std84	0.0350657	0.0351166	0.0356839	smoking	Projected
Czech Republic	CZE	Women	2064	std84	0.0350637	0.0351039	0.0356007	smoking	Projected
Czech Republic	CZE	Women	2065	std84	0.0350623	0.0350941	0.0355295	smoking	Projected
Czech Republic	CZE	Women	1990	std84		0.0196132		alcohol	Observed
Czech Republic	CZE	Women	1991	std84		0.0201124		alcohol	Observed
Czech Republic	CZE	Women	1992	std84		0.0205616		alcohol	Observed
Czech Republic	CZE	Women	1993	std84		0.0207827		alcohol	Observed
Czech Republic	CZE	Women	1994	std84		0.0213574		alcohol	Observed
Czech Republic	CZE	Women	1995	std84		0.0218206		alcohol	Observed
Czech Republic	CZE	Women	1996	std84		0.0228712		alcohol	Observed
Czech Republic	CZE	Women	1997	std84		0.0245363		alcohol	Observed
Czech Republic	CZE	Women	1998	std84		0.0267082		alcohol	Observed
Czech Republic	CZE	Women	1999	std84		0.0278719		alcohol	Observed
Czech Republic	CZE	Women	2000	std84		0.0293292		alcohol	Observed
Czech Republic	CZE	Women	2001	std84		0.029553		alcohol	Observed
Czech Republic	CZE	Women	2002	std84		0.0300299		alcohol	Observed
Czech Republic	CZE	Women	2003	std84		0.0302527		alcohol	Observed
Czech Republic	CZE	Women	2004	std84		0.0307667		alcohol	Observed
Czech Republic	CZE	Women	2005	std84		0.0309907		alcohol	Observed
Czech Republic	CZE	Women	2006	std84		0.0312095		alcohol	Observed
Czech Republic	CZE	Women	2007	std84		0.0309811		alcohol	Observed
Czech Republic	CZE	Women	2008	std84		0.0307765		alcohol	Observed
Czech Republic	CZE	Women	2009	std84		0.0299944		alcohol	Observed
Czech Republic	CZE	Women	2010	std84		0.029854		alcohol	Observed
Czech Republic	CZE	Women	2011	std84		0.029825		alcohol	Observed
Czech Republic	CZE	Women	2012	std84		0.0298536		alcohol	Observed
Czech Republic	CZE	Women	2013	std84		0.0294023		alcohol	Observed
Czech Republic	CZE	Women	2014	std84		0.0298729		alcohol	Observed
Czech Republic	CZE	Women	2015	std84		0.0291923		alcohol	Observed
Czech Republic	CZE	Women	2016	std84		0.02981		alcohol	Observed
Czech Republic	CZE	Women	2017	std84	0.0285249	0.0296287	0.0307716	alcohol	Projected
Czech Republic	CZE	Women	2018	std84	0.0274621	0.0296079	0.0319375	alcohol	Projected
Czech Republic	CZE	Women	2019	std84	0.0262049	0.0291556	0.0324952	alcohol	Projected
Czech Republic	CZE	Women	2020	std84	0.0249169	0.0283195	0.0322421	alcohol	Projected
Czech Republic	CZE	Women	2021	std84	0.0236803	0.0271932	0.0313451	alcohol	Projected
Czech Republic	CZE	Women	2022	std84	0.0225136	0.0259162	0.0300036	alcohol	Projected
Czech Republic	CZE	Women	2023	std84	0.0214595	0.0246419	0.0284745	alcohol	Projected
Czech Republic	CZE	Women	2024	std84	0.0204782	0.02345	0.027067	alcohol	Projected
Czech Republic	CZE	Women	2025	std84	0.0195617	0.0223984	0.025836	alcohol	Projected
Czech Republic	CZE	Women	2026	std84	0.0187628	0.0214782	0.0247718	alcohol	Projected
Czech Republic	CZE	Women	2027	std84	0.0180754	0.020671	0.0237977	alcohol	Projected
Czech Republic	CZE	Women	2028	std84	0.0174707	0.019922	0.0228996	alcohol	Projected
Czech Republic	CZE	Women	2029	std84	0.0168884	0.0192044	0.0220208	alcohol	Projected
Czech Republic	CZE	Women	2030	std84	0.0162619	0.0184573	0.0211379	alcohol	Projected
Czech Republic	CZE	Women	2031	std84	0.0155671	0.0176782	0.0202438	alcohol	Projected
Czech Republic	CZE	Women	2032	std84	0.0148642	0.0168595	0.0193161	alcohol	Projected
Czech Republic	CZE	Women	2033	std84	0.01414	0.0160076	0.0183303	alcohol	Projected
Czech Republic	CZE	Women	2034	std84	0.0134263	0.0151644	0.017317	alcohol	Projected
Czech Republic	CZE	Women	2035	std84	0.0127704	0.0143414	0.0163255	alcohol	Projected
Czech Republic	CZE	Women	2036	std84	0.0121496	0.0135674	0.0153654	alcohol	Projected
Czech Republic	CZE	Women	2037	std84	0.011581	0.0128604	0.0144827	alcohol	Projected
Czech Republic	CZE	Women	2038	std84	0.0110631	0.0122152	0.0136799	alcohol	Projected
Czech Republic	CZE	Women	2039	std84	0.0105934	0.0116305	0.0129367	alcohol	Projected
Czech Republic	CZE	Women	2040	std84	0.0101775	0.0110984	0.012263	alcohol	Projected
Czech Republic	CZE	Women	2041	std84	0.00979661	0.0106152	0.0116647	alcohol	Projected
Czech Republic	CZE	Women	2042	std84	0.00943622	0.0101739	0.0111095	alcohol	Projected
Czech Republic	CZE	Women	2043	std84	0.00910759	0.00976362	0.0106004	alcohol	Projected
Czech Republic	CZE	Women	2044	std84	0.00880325	0.00938758	0.0101317	alcohol	Projected
Czech Republic	CZE	Women	2045	std84	0.00852629	0.00904193	0.00969886	alcohol	Projected
Czech Republic	CZE	Women	2046	std84	0.00827069	0.00872554	0.00930541	alcohol	Projected
Czech Republic	CZE	Women	2047	std84	0.00804467	0.00843949	0.00894369	alcohol	Projected
Czech Republic	CZE	Women	2048	std84	0.00784023	0.00818376	0.00862317	alcohol	Projected
Czech Republic	CZE	Women	2049	std84	0.00766293	0.0079575	0.00833939	alcohol	Projected
Czech Republic	CZE	Women	2050	std84	0.00750549	0.0077597	0.00808697	alcohol	Projected
Czech Republic	CZE	Women	2051	std84	0.00736803	0.00758719	0.00786614	alcohol	Projected
Czech Republic	CZE	Women	2052	std84	0.00725121	0.00743845	0.00767677	alcohol	Projected
Czech Republic	CZE	Women	2053	std84	0.00715107	0.00730965	0.00751288	alcohol	Projected
Czech Republic	CZE	Women	2054	std84	0.00706275	0.0071994	0.00737313	alcohol	Projected
Czech Republic	CZE	Women	2055	std84	0.00698873	0.00710393	0.00725386	alcohol	Projected
Czech Republic	CZE	Women	2056	std84	0.00692499	0.00702245	0.0071508	alcohol	Projected
Czech Republic	CZE	Women	2057	std84	0.00686979	0.00695293	0.00706233	alcohol	Projected
Czech Republic	CZE	Women	2058	std84	0.00682344	0.00689365	0.00698723	alcohol	Projected
Czech Republic	CZE	Women	2059	std84	0.00678443	0.00684331	0.00692248	alcohol	Projected
Czech Republic	CZE	Women	2060	std84	0.00675143	0.00680097	0.00686727	alcohol	Projected
Czech Republic	CZE	Women	2061	std84	0.00672361	0.00676542	0.00682142	alcohol	Projected
Czech Republic	CZE	Women	2062	std84	0.0067005	0.00673563	0.00678285	alcohol	Projected
Czech Republic	CZE	Women	2063	std84	0.00668176	0.00671095	0.00675048	alcohol	Projected
Czech Republic	CZE	Women	2064	std84	0.00666614	0.00669047	0.00672365	alcohol	Projected
Czech Republic	CZE	Women	2065	std84	0.0066534	0.00667352	0.00670169	alcohol	Projected
Czech Republic	CZE	Women	1990	std84		0.111196		obesity	Observed
Czech Republic	CZE	Women	1991	std84		0.111617		obesity	Observed
Czech Republic	CZE	Women	1992	std84		0.112031		obesity	Observed
Czech Republic	CZE	Women	1993	std84		0.112438		obesity	Observed
Czech Republic	CZE	Women	1994	std84		0.112851		obesity	Observed
Czech Republic	CZE	Women	1995	std84		0.113268		obesity	Observed
Czech Republic	CZE	Women	1996	std84		0.113702		obesity	Observed
Czech Republic	CZE	Women	1997	std84		0.114146		obesity	Observed
Czech Republic	CZE	Women	1998	std84		0.114604		obesity	Observed
Czech Republic	CZE	Women	1999	std84		0.115087		obesity	Observed
Czech Republic	CZE	Women	2000	std84		0.115597		obesity	Observed
Czech Republic	CZE	Women	2001	std84		0.116142		obesity	Observed
Czech Republic	CZE	Women	2002	std84		0.116716		obesity	Observed
Czech Republic	CZE	Women	2003	std84		0.117325		obesity	Observed
Czech Republic	CZE	Women	2004	std84		0.117967		obesity	Observed
Czech Republic	CZE	Women	2005	std84		0.11864		obesity	Observed
Czech Republic	CZE	Women	2006	std84		0.119345		obesity	Observed
Czech Republic	CZE	Women	2007	std84		0.120084		obesity	Observed
Czech Republic	CZE	Women	2008	std84		0.120841		obesity	Observed
Czech Republic	CZE	Women	2009	std84		0.121623		obesity	Observed
Czech Republic	CZE	Women	2010	std84		0.122424		obesity	Observed
Czech Republic	CZE	Women	2011	std84		0.123241		obesity	Observed
Czech Republic	CZE	Women	2012	std84		0.124078		obesity	Observed
Czech Republic	CZE	Women	2013	std84		0.124934		obesity	Observed
Czech Republic	CZE	Women	2014	std84		0.125807		obesity	Observed
Czech Republic	CZE	Women	2015	std84		0.126692		obesity	Observed
Czech Republic	CZE	Women	2016	std84		0.127604		obesity	Observed
Czech Republic	CZE	Women	2017	std84	0.128464	0.128675	0.128885	obesity	Projected
Czech Republic	CZE	Women	2018	std84	0.129087	0.129558	0.130038	obesity	Projected
Czech Republic	CZE	Women	2019	std84	0.129616	0.130413	0.131224	obesity	Projected
Czech Republic	CZE	Women	2020	std84	0.130057	0.13124	0.132428	obesity	Projected
Czech Republic	CZE	Women	2021	std84	0.130428	0.132031	0.133664	obesity	Projected
Czech Republic	CZE	Women	2022	std84	0.130716	0.132794	0.134909	obesity	Projected
Czech Republic	CZE	Women	2023	std84	0.130928	0.13352	0.136188	obesity	Projected
Czech Republic	CZE	Women	2024	std84	0.131061	0.134214	0.137476	obesity	Projected
Czech Republic	CZE	Women	2025	std84	0.13114	0.134865	0.138774	obesity	Projected
Czech Republic	CZE	Women	2026	std84	0.131136	0.135488	0.140066	obesity	Projected
Czech Republic	CZE	Women	2027	std84	0.131096	0.136073	0.141371	obesity	Projected
Czech Republic	CZE	Women	2028	std84	0.13097	0.136606	0.142676	obesity	Projected
Czech Republic	CZE	Women	2029	std84	0.13076	0.137112	0.143978	obesity	Projected
Czech Republic	CZE	Women	2030	std84	0.130491	0.137582	0.145278	obesity	Projected
Czech Republic	CZE	Women	2031	std84	0.130197	0.138008	0.146602	obesity	Projected
Czech Republic	CZE	Women	2032	std84	0.129807	0.138391	0.147919	obesity	Projected
Czech Republic	CZE	Women	2033	std84	0.129373	0.13872	0.149227	obesity	Projected
Czech Republic	CZE	Women	2034	std84	0.128883	0.139027	0.150502	obesity	Projected
Czech Republic	CZE	Women	2035	std84	0.128324	0.139289	0.15178	obesity	Projected
Czech Republic	CZE	Women	2036	std84	0.127719	0.139498	0.153046	obesity	Projected
Czech Republic	CZE	Women	2037	std84	0.127057	0.139664	0.15434	obesity	Projected
Czech Republic	CZE	Women	2038	std84	0.12636	0.139786	0.155609	obesity	Projected
Czech Republic	CZE	Women	2039	std84	0.125603	0.13987	0.156927	obesity	Projected
Czech Republic	CZE	Women	2040	std84	0.124802	0.139923	0.158194	obesity	Projected
Czech Republic	CZE	Women	2041	std84	0.123961	0.139928	0.159389	obesity	Projected
Czech Republic	CZE	Women	2042	std84	0.123046	0.139907	0.160602	obesity	Projected
Czech Republic	CZE	Women	2043	std84	0.122101	0.139817	0.16182	obesity	Projected
Czech Republic	CZE	Women	2044	std84	0.121152	0.139674	0.163018	obesity	Projected
Czech Republic	CZE	Women	2045	std84	0.1201	0.13949	0.164178	obesity	Projected
Czech Republic	CZE	Women	2046	std84	0.119028	0.13928	0.165318	obesity	Projected
Czech Republic	CZE	Women	2047	std84	0.117946	0.139029	0.166439	obesity	Projected
Czech Republic	CZE	Women	2048	std84	0.116829	0.138732	0.167591	obesity	Projected
Czech Republic	CZE	Women	2049	std84	0.115694	0.138397	0.168658	obesity	Projected
Czech Republic	CZE	Women	2050	std84	0.114507	0.138032	0.169767	obesity	Projected
Czech Republic	CZE	Women	2051	std84	0.113367	0.137602	0.170829	obesity	Projected
Czech Republic	CZE	Women	2052	std84	0.112156	0.137139	0.171823	obesity	Projected
Czech Republic	CZE	Women	2053	std84	0.110961	0.136647	0.172839	obesity	Projected
Czech Republic	CZE	Women	2054	std84	0.109733	0.136109	0.173801	obesity	Projected
Czech Republic	CZE	Women	2055	std84	0.108475	0.135548	0.174723	obesity	Projected
Czech Republic	CZE	Women	2056	std84	0.107193	0.134945	0.175532	obesity	Projected
Czech Republic	CZE	Women	2057	std84	0.105935	0.134327	0.176232	obesity	Projected
Czech Republic	CZE	Women	2058	std84	0.104659	0.133662	0.177071	obesity	Projected
Czech Republic	CZE	Women	2059	std84	0.103409	0.132942	0.177904	obesity	Projected
Czech Republic	CZE	Women	2060	std84	0.102149	0.132193	0.178612	obesity	Projected
Czech Republic	CZE	Women	2061	std84	0.100852	0.131401	0.179237	obesity	Projected
Czech Republic	CZE	Women	2062	std84	0.0995911	0.130598	0.179884	obesity	Projected
Czech Republic	CZE	Women	2063	std84	0.0983237	0.129745	0.180366	obesity	Projected
Czech Republic	CZE	Women	2064	std84	0.0970478	0.128851	0.181073	obesity	Projected
Czech Republic	CZE	Women	2065	std84	0.0957946	0.127931	0.181701	obesity	Projected
Czech Republic		Women	1990	std84		0.19172		lifestyle (combined)	Observed
Czech Republic		Women	1991	std84		0.203393		lifestyle (combined)	Observed
Czech Republic		Women	1992	std84		0.202661		lifestyle (combined)	Observed
Czech Republic		Women	1993	std84		0.203361		lifestyle (combined)	Observed
Czech Republic		Women	1994	std84		0.215163		lifestyle (combined)	Observed
Czech Republic		Women	1995	std84		0.217189		lifestyle (combined)	Observed
Czech Republic		Women	1996	std84		0.221549		lifestyle (combined)	Observed
Czech Republic		Women	1997	std84		0.215683		lifestyle (combined)	Observed
Czech Republic		Women	1998	std84		0.227993		lifestyle (combined)	Observed
Czech Republic		Women	1999	std84		0.237015		lifestyle (combined)	Observed
Czech Republic		Women	2000	std84		0.238554		lifestyle (combined)	Observed
Czech Republic		Women	2001	std84		0.24455		lifestyle (combined)	Observed
Czech Republic		Women	2002	std84		0.242269		lifestyle (combined)	Observed
Czech Republic		Women	2003	std84		0.245166		lifestyle (combined)	Observed
Czech Republic		Women	2004	std84		0.244578		lifestyle (combined)	Observed
Czech Republic		Women	2005	std84		0.247756		lifestyle (combined)	Observed
Czech Republic		Women	2006	std84		0.254105		lifestyle (combined)	Observed
Czech Republic		Women	2007	std84		0.251302		lifestyle (combined)	Observed
Czech Republic		Women	2008	std84		0.256017		lifestyle (combined)	Observed
Czech Republic		Women	2009	std84		0.25114		lifestyle (combined)	Observed
Czech Republic		Women	2010	std84		0.261006		lifestyle (combined)	Observed
Czech Republic		Women	2011	std84		0.269266		lifestyle (combined)	Observed
Czech Republic		Women	2012	std84		0.274161		lifestyle (combined)	Observed
Czech Republic		Women	2013	std84		0.268237		lifestyle (combined)	Observed
Czech Republic		Women	2014	std84		0.266294		lifestyle (combined)	Observed
Czech Republic		Women	2015	std84		0.265155		lifestyle (combined)	Observed
Czech Republic		Women	2015	std84		0.265155		lifestyle (combined)	Projected
Czech Republic		Women	2016	std84		0.266517		lifestyle (combined)	Observed
Czech Republic		Women	2016	std84		0.266517		lifestyle (combined)	Projected
Czech Republic		Women	2017	std84		0.262686		lifestyle (combined)	Projected
Czech Republic		Women	2018	std84		0.261935		lifestyle (combined)	Projected
Czech Republic		Women	2019	std84		0.26089		lifestyle (combined)	Projected
Czech Republic		Women	2020	std84		0.259235		lifestyle (combined)	Projected
Czech Republic		Women	2021	std84		0.256979		lifestyle (combined)	Projected
Czech Republic		Women	2022	std84		0.254336		lifestyle (combined)	Projected
Czech Republic		Women	2023	std84		0.251501		lifestyle (combined)	Projected
Czech Republic		Women	2024	std84		0.248429		lifestyle (combined)	Projected
Czech Republic		Women	2025	std84		0.245294		lifestyle (combined)	Projected
Czech Republic		Women	2026	std84		0.241927		lifestyle (combined)	Projected
Czech Republic		Women	2027	std84		0.238554		lifestyle (combined)	Projected
Czech Republic		Women	2028	std84		0.235062		lifestyle (combined)	Projected
Czech Republic		Women	2029	std84		0.231496		lifestyle (combined)	Projected
Czech Republic		Women	2030	std84		0.227847		lifestyle (combined)	Projected
Czech Republic		Women	2031	std84		0.224012		lifestyle (combined)	Projected
Czech Republic		Women	2032	std84		0.220173		lifestyle (combined)	Projected
Czech Republic		Women	2033	std84		0.216383		lifestyle (combined)	Projected
Czech Republic		Women	2034	std84		0.212635		lifestyle (combined)	Projected
Czech Republic		Women	2035	std84		0.208944		lifestyle (combined)	Projected
Czech Republic		Women	2036	std84		0.205387		lifestyle (combined)	Projected
Czech Republic		Women	2037	std84		0.202038		lifestyle (combined)	Projected
Czech Republic		Women	2038	std84		0.19884		lifestyle (combined)	Projected
Czech Republic		Women	2039	std84		0.195904		lifestyle (combined)	Projected
Czech Republic		Women	2040	std84		0.193168		lifestyle (combined)	Projected
Czech Republic		Women	2041	std84		0.190662		lifestyle (combined)	Projected
Czech Republic		Women	2042	std84		0.188377		lifestyle (combined)	Projected
Czech Republic		Women	2043	std84		0.186291		lifestyle (combined)	Projected
Czech Republic		Women	2044	std84		0.184393		lifestyle (combined)	Projected
Czech Republic		Women	2045	std84		0.182686		lifestyle (combined)	Projected
Czech Republic		Women	2046	std84		0.181146		lifestyle (combined)	Projected
Czech Republic		Women	2047	std84		0.179745		lifestyle (combined)	Projected
Czech Republic		Women	2048	std84		0.178472		lifestyle (combined)	Projected
Czech Republic		Women	2049	std84		0.177324		lifestyle (combined)	Projected
Czech Republic		Women	2050	std84		0.176307		lifestyle (combined)	Projected
Czech Republic		Women	2051	std84		0.175353		lifestyle (combined)	Projected
Czech Republic		Women	2052	std84		0.174472		lifestyle (combined)	Projected
Czech Republic		Women	2053	std84		0.173673		lifestyle (combined)	Projected
Czech Republic		Women	2054	std84		0.172902		lifestyle (combined)	Projected
Czech Republic		Women	2055	std84		0.172164		lifestyle (combined)	Projected
Czech Republic		Women	2056	std84		0.171428		lifestyle (combined)	Projected
Czech Republic		Women	2057	std84		0.17071		lifestyle (combined)	Projected
Czech Republic		Women	2058	std84		0.169973		lifestyle (combined)	Projected
Czech Republic		Women	2059	std84		0.169201		lifestyle (combined)	Projected
Czech Republic		Women	2060	std84		0.168418		lifestyle (combined)	Projected
Czech Republic		Women	2061	std84		0.167605		lifestyle (combined)	Projected
Czech Republic		Women	2062	std84		0.166793		lifestyle (combined)	Projected
Czech Republic		Women	2063	std84		0.16594		lifestyle (combined)	Projected
Czech Republic		Women	2064	std84		0.165055		lifestyle (combined)	Projected
Czech Republic		Women	2065	std84		0.164151		lifestyle (combined)	Projected
Denmark	DNK	Women	1990	std84		0.216756		smoking	Observed
Denmark	DNK	Women	1991	std84		0.229395		smoking	Observed
Denmark	DNK	Women	1992	std84		0.221038		smoking	Observed
Denmark	DNK	Women	1993	std84		0.237309		smoking	Observed
Denmark	DNK	Women	1994	std84		0.2549		smoking	Observed
Denmark	DNK	Women	1995	std84		0.259009		smoking	Observed
Denmark	DNK	Women	1996	std84		0.250183		smoking	Observed
Denmark	DNK	Women	1997	std84		0.272157		smoking	Observed
Denmark	DNK	Women	1998	std84		0.259196		smoking	Observed
Denmark	DNK	Women	1999	std84		0.267921		smoking	Observed
Denmark	DNK	Women	2000	std84		0.267712		smoking	Observed
Denmark	DNK	Women	2001	std84		0.27265		smoking	Observed
Denmark	DNK	Women	2002	std84		0.267047		smoking	Observed
Denmark	DNK	Women	2003	std84		0.274388		smoking	Observed
Denmark	DNK	Women	2004	std84		0.285257		smoking	Observed
Denmark	DNK	Women	2005	std84		0.291757		smoking	Observed
Denmark	DNK	Women	2006	std84		0.291363		smoking	Observed
Denmark	DNK	Women	2007	std84		0.2685		smoking	Observed
Denmark	DNK	Women	2008	std84		0.286762		smoking	Observed
Denmark	DNK	Women	2009	std84		0.284219		smoking	Observed
Denmark	DNK	Women	2010	std84		0.28676		smoking	Observed
Denmark	DNK	Women	2011	std84		0.279738		smoking	Observed
Denmark	DNK	Women	2012	std84		0.27873		smoking	Observed
Denmark	DNK	Women	2013	std84		0.273218		smoking	Observed
Denmark	DNK	Women	2014	std84		0.269841		smoking	Observed
Denmark	DNK	Women	2015	std84		0.268803		smoking	Observed
Denmark	DNK	Women	2016	std84	0.231369	0.261652	0.288658	smoking	Projected
Denmark	DNK	Women	2017	std84	0.21904	0.256331	0.290012	smoking	Projected
Denmark	DNK	Women	2018	std84	0.205289	0.249995	0.29013	smoking	Projected
Denmark	DNK	Women	2019	std84	0.192462	0.243245	0.289351	smoking	Projected
Denmark	DNK	Women	2020	std84	0.179748	0.235987	0.287271	smoking	Projected
Denmark	DNK	Women	2021	std84	0.167516	0.228255	0.284908	smoking	Projected
Denmark	DNK	Women	2022	std84	0.155591	0.219903	0.280886	smoking	Projected
Denmark	DNK	Women	2023	std84	0.144709	0.210947	0.276551	smoking	Projected
Denmark	DNK	Women	2024	std84	0.134153	0.202048	0.271974	smoking	Projected
Denmark	DNK	Women	2025	std84	0.12368	0.192712	0.267158	smoking	Projected
Denmark	DNK	Women	2026	std84	0.114016	0.183193	0.261218	smoking	Projected
Denmark	DNK	Women	2027	std84	0.104958	0.173753	0.25484	smoking	Projected
Denmark	DNK	Women	2028	std84	0.0971813	0.163762	0.247485	smoking	Projected
Denmark	DNK	Women	2029	std84	0.0892874	0.153995	0.239903	smoking	Projected
Denmark	DNK	Women	2030	std84	0.0826075	0.1444	0.232352	smoking	Projected
Denmark	DNK	Women	2031	std84	0.0761131	0.134555	0.223804	smoking	Projected
Denmark	DNK	Women	2032	std84	0.0705828	0.12535	0.214179	smoking	Projected
Denmark	DNK	Women	2033	std84	0.0655916	0.116258	0.204924	smoking	Projected
Denmark	DNK	Women	2034	std84	0.0612635	0.107886	0.194954	smoking	Projected
Denmark	DNK	Women	2035	std84	0.0574866	0.0995323	0.18496	smoking	Projected
Denmark	DNK	Women	2036	std84	0.0541576	0.0921781	0.174883	smoking	Projected
Denmark	DNK	Women	2037	std84	0.0513328	0.0852406	0.164259	smoking	Projected
Denmark	DNK	Women	2038	std84	0.04884	0.0787088	0.153789	smoking	Projected
Denmark	DNK	Women	2039	std84	0.0467187	0.0728163	0.143173	smoking	Projected
Denmark	DNK	Women	2040	std84	0.0449358	0.0676028	0.132974	smoking	Projected
Denmark	DNK	Women	2041	std84	0.0434985	0.0629675	0.122931	smoking	Projected
Denmark	DNK	Women	2042	std84	0.042223	0.0589492	0.113951	smoking	Projected
Denmark	DNK	Women	2043	std84	0.0412805	0.0554562	0.104818	smoking	Projected
Denmark	DNK	Women	2044	std84	0.0404965	0.0523072	0.0962605	smoking	Projected
Denmark	DNK	Women	2045	std84	0.0398284	0.0496719	0.0888577	smoking	Projected
Denmark	DNK	Women	2046	std84	0.0392836	0.0473868	0.0816128	smoking	Projected
Denmark	DNK	Women	2047	std84	0.0388492	0.0454538	0.0751369	smoking	Projected
Denmark	DNK	Women	2048	std84	0.0385033	0.0438652	0.069016	smoking	Projected
Denmark	DNK	Women	2049	std84	0.0382061	0.0425037	0.0637072	smoking	Projected
Denmark	DNK	Women	2050	std84	0.0379783	0.0414228	0.0593906	smoking	Projected
Denmark	DNK	Women	2051	std84	0.0378071	0.0405776	0.0557617	smoking	Projected
Denmark	DNK	Women	2052	std84	0.0376775	0.0398964	0.0526027	smoking	Projected
Denmark	DNK	Women	2053	std84	0.0375751	0.0393736	0.050105	smoking	Projected
Denmark	DNK	Women	2054	std84	0.0375043	0.038967	0.0479957	smoking	Projected
Denmark	DNK	Women	2055	std84	0.0374492	0.038646	0.0463078	smoking	Projected
Denmark	DNK	Women	2056	std84	0.0374016	0.0383791	0.044933	smoking	Projected
Denmark	DNK	Women	2057	std84	0.0373658	0.038162	0.0437573	smoking	Projected
Denmark	DNK	Women	2058	std84	0.0373367	0.0379841	0.0427191	smoking	Projected
Denmark	DNK	Women	2059	std84	0.0373146	0.0378381	0.0417517	smoking	Projected
Denmark	DNK	Women	2060	std84	0.0372965	0.0377194	0.0410068	smoking	Projected
Denmark	DNK	Women	2061	std84	0.0372826	0.0376199	0.0403645	smoking	Projected
Denmark	DNK	Women	2062	std84	0.037272	0.0375435	0.039816	smoking	Projected
Denmark	DNK	Women	2063	std84	0.0372633	0.0374805	0.0393452	smoking	Projected
Denmark	DNK	Women	2064	std84	0.0372568	0.0374288	0.0389618	smoking	Projected
Denmark	DNK	Women	2065	std84	0.0372518	0.0373889	0.0386529	smoking	Projected
Denmark	DNK	Women	1990	std84		0.0374702		alcohol	Observed
Denmark	DNK	Women	1991	std84		0.0383044		alcohol	Observed
Denmark	DNK	Women	1992	std84		0.0394259		alcohol	Observed
Denmark	DNK	Women	1993	std84		0.0396751		alcohol	Observed
Denmark	DNK	Women	1994	std84		0.0412258		alcohol	Observed
Denmark	DNK	Women	1995	std84		0.041533		alcohol	Observed
Denmark	DNK	Women	1996	std84		0.043556		alcohol	Observed
Denmark	DNK	Women	1997	std84		0.044977		alcohol	Observed
Denmark	DNK	Women	1998	std84		0.0464469		alcohol	Observed
Denmark	DNK	Women	1999	std84		0.0495316		alcohol	Observed
Denmark	DNK	Women	2000	std84		0.0482659		alcohol	Observed
Denmark	DNK	Women	2001	std84		0.0488466		alcohol	Observed
Denmark	DNK	Women	2002	std84		0.0503734		alcohol	Observed
Denmark	DNK	Women	2003	std84		0.0524531		alcohol	Observed
Denmark	DNK	Women	2004	std84		0.0518427		alcohol	Observed
Denmark	DNK	Women	2005	std84		0.0532443		alcohol	Observed
Denmark	DNK	Women	2006	std84		0.0536662		alcohol	Observed
Denmark	DNK	Women	2007	std84		0.0535964		alcohol	Observed
Denmark	DNK	Women	2008	std84		0.0528199		alcohol	Observed
Denmark	DNK	Women	2009	std84		0.0511201		alcohol	Observed
Denmark	DNK	Women	2010	std84		0.0497979		alcohol	Observed
Denmark	DNK	Women	2011	std84		0.049521		alcohol	Observed
Denmark	DNK	Women	2012	std84		0.048117		alcohol	Observed
Denmark	DNK	Women	2013	std84		0.0481238		alcohol	Observed
Denmark	DNK	Women	2014	std84		0.0470315		alcohol	Observed
Denmark	DNK	Women	2015	std84		0.047425		alcohol	Observed
Denmark	DNK	Women	2016	std84		0.0486788		alcohol	Observed
Denmark	DNK	Women	2017	std84	0.0439766	0.0464695	0.0490905	alcohol	Projected
Denmark	DNK	Women	2018	std84	0.0415761	0.0456879	0.0502585	alcohol	Projected
Denmark	DNK	Women	2019	std84	0.0392805	0.0445796	0.0507361	alcohol	Projected
Denmark	DNK	Women	2020	std84	0.0372661	0.043352	0.0507925	alcohol	Projected
Denmark	DNK	Women	2021	std84	0.035371	0.0420596	0.0504702	alcohol	Projected
Denmark	DNK	Women	2022	std84	0.0335913	0.0406671	0.0499452	alcohol	Projected
Denmark	DNK	Women	2023	std84	0.0319736	0.0392551	0.0491171	alcohol	Projected
Denmark	DNK	Women	2024	std84	0.0304612	0.037845	0.0480518	alcohol	Projected
Denmark	DNK	Women	2025	std84	0.0289789	0.0364255	0.0468981	alcohol	Projected
Denmark	DNK	Women	2026	std84	0.0276448	0.0349738	0.0456346	alcohol	Projected
Denmark	DNK	Women	2027	std84	0.026352	0.0335654	0.0443096	alcohol	Projected
Denmark	DNK	Women	2028	std84	0.025205	0.0321829	0.0429692	alcohol	Projected
Denmark	DNK	Women	2029	std84	0.0240369	0.0308356	0.0414947	alcohol	Projected
Denmark	DNK	Women	2030	std84	0.022996	0.0295223	0.0399067	alcohol	Projected
Denmark	DNK	Women	2031	std84	0.0220481	0.0282518	0.0382867	alcohol	Projected
Denmark	DNK	Women	2032	std84	0.0211144	0.027015	0.03676	alcohol	Projected
Denmark	DNK	Women	2033	std84	0.0202883	0.0258326	0.0352018	alcohol	Projected
Denmark	DNK	Women	2034	std84	0.0195026	0.0247199	0.0337177	alcohol	Projected
Denmark	DNK	Women	2035	std84	0.0187903	0.0236555	0.0321797	alcohol	Projected
Denmark	DNK	Women	2036	std84	0.0181331	0.0226386	0.0306825	alcohol	Projected
Denmark	DNK	Women	2037	std84	0.0175083	0.021705	0.0292812	alcohol	Projected
Denmark	DNK	Women	2038	std84	0.016957	0.0208114	0.027891	alcohol	Projected
Denmark	DNK	Women	2039	std84	0.0164351	0.0199745	0.0265735	alcohol	Projected
Denmark	DNK	Women	2040	std84	0.0159762	0.0192084	0.0253483	alcohol	Projected
Denmark	DNK	Women	2041	std84	0.015552	0.0184994	0.0241905	alcohol	Projected
Denmark	DNK	Women	2042	std84	0.0151836	0.0178487	0.0230418	alcohol	Projected
Denmark	DNK	Women	2043	std84	0.0148515	0.0172493	0.021996	alcohol	Projected
Denmark	DNK	Women	2044	std84	0.0145545	0.0167025	0.0210212	alcohol	Projected
Denmark	DNK	Women	2045	std84	0.0142864	0.0162045	0.0201249	alcohol	Projected
Denmark	DNK	Women	2046	std84	0.0140426	0.0157545	0.0193003	alcohol	Projected
Denmark	DNK	Women	2047	std84	0.0138319	0.0153467	0.0185206	alcohol	Projected
Denmark	DNK	Women	2048	std84	0.0136477	0.0149816	0.0178174	alcohol	Projected
Denmark	DNK	Women	2049	std84	0.0134842	0.014653	0.0171788	alcohol	Projected
Denmark	DNK	Women	2050	std84	0.0133429	0.0143611	0.0165897	alcohol	Projected
Denmark	DNK	Women	2051	std84	0.0132136	0.0141018	0.0160713	alcohol	Projected
Denmark	DNK	Women	2052	std84	0.0131041	0.013874	0.0155848	alcohol	Projected
Denmark	DNK	Women	2053	std84	0.013013	0.0136751	0.0151851	alcohol	Projected
Denmark	DNK	Women	2054	std84	0.0129322	0.0135003	0.0148128	alcohol	Projected
Denmark	DNK	Women	2055	std84	0.0128627	0.013349	0.0144875	alcohol	Projected
Denmark	DNK	Women	2056	std84	0.0128027	0.0132189	0.0141973	alcohol	Projected
Denmark	DNK	Women	2057	std84	0.012753	0.0131071	0.0139534	alcohol	Projected
Denmark	DNK	Women	2058	std84	0.0127097	0.0130103	0.0137346	alcohol	Projected
Denmark	DNK	Women	2059	std84	0.0126734	0.0129274	0.0135463	alcohol	Projected
Denmark	DNK	Women	2060	std84	0.0126432	0.0128569	0.0133815	alcohol	Projected
Denmark	DNK	Women	2061	std84	0.0126181	0.0127971	0.0132442	alcohol	Projected
Denmark	DNK	Women	2062	std84	0.0125966	0.0127466	0.0131254	alcohol	Projected
Denmark	DNK	Women	2063	std84	0.0125788	0.0127039	0.0130228	alcohol	Projected
Denmark	DNK	Women	2064	std84	0.0125641	0.0126683	0.0129353	alcohol	Projected
Denmark	DNK	Women	2065	std84	0.0125519	0.012638	0.0128631	alcohol	Projected
Denmark	DNK	Women	1990	std84		0.0634323		obesity	Observed
Denmark	DNK	Women	1991	std84		0.0644764		obesity	Observed
Denmark	DNK	Women	1992	std84		0.0655283		obesity	Observed
Denmark	DNK	Women	1993	std84		0.0665849		obesity	Observed
Denmark	DNK	Women	1994	std84		0.067644		obesity	Observed
Denmark	DNK	Women	1995	std84		0.0687061		obesity	Observed
Denmark	DNK	Women	1996	std84		0.0697681		obesity	Observed
Denmark	DNK	Women	1997	std84		0.0708289		obesity	Observed
Denmark	DNK	Women	1998	std84		0.0718799		obesity	Observed
Denmark	DNK	Women	1999	std84		0.0729262		obesity	Observed
Denmark	DNK	Women	2000	std84		0.073961		obesity	Observed
Denmark	DNK	Women	2001	std84		0.0750019		obesity	Observed
Denmark	DNK	Women	2002	std84		0.0760456		obesity	Observed
Denmark	DNK	Women	2003	std84		0.0770939		obesity	Observed
Denmark	DNK	Women	2004	std84		0.0781464		obesity	Observed
Denmark	DNK	Women	2005	std84		0.0791945		obesity	Observed
Denmark	DNK	Women	2006	std84		0.0802346		obesity	Observed
Denmark	DNK	Women	2007	std84		0.0812706		obesity	Observed
Denmark	DNK	Women	2008	std84		0.0823055		obesity	Observed
Denmark	DNK	Women	2009	std84		0.0833389		obesity	Observed
Denmark	DNK	Women	2010	std84		0.0843709		obesity	Observed
Denmark	DNK	Women	2011	std84		0.0853969		obesity	Observed
Denmark	DNK	Women	2012	std84		0.0864243		obesity	Observed
Denmark	DNK	Women	2013	std84		0.0874567		obesity	Observed
Denmark	DNK	Women	2014	std84		0.0884983		obesity	Observed
Denmark	DNK	Women	2015	std84		0.0895535		obesity	Observed
Denmark	DNK	Women	2016	std84		0.0906174		obesity	Observed
Denmark	DNK	Women	2017	std84	0.0917596	0.0917959	0.0918322	obesity	Projected
Denmark	DNK	Women	2018	std84	0.0927709	0.0928536	0.0929368	obesity	Projected
Denmark	DNK	Women	2019	std84	0.0937485	0.0938917	0.0940352	obesity	Projected
Denmark	DNK	Women	2020	std84	0.0946917	0.094907	0.0951217	obesity	Projected
Denmark	DNK	Women	2021	std84	0.0955986	0.0958968	0.0961967	obesity	Projected
Denmark	DNK	Women	2022	std84	0.0964668	0.0968584	0.097253	obesity	Projected
Denmark	DNK	Women	2023	std84	0.0972955	0.0977896	0.0982881	obesity	Projected
Denmark	DNK	Women	2024	std84	0.0980825	0.0986862	0.0993025	obesity	Projected
Denmark	DNK	Women	2025	std84	0.0988214	0.0995463	0.100289	obesity	Projected
Denmark	DNK	Women	2026	std84	0.0995136	0.100366	0.101247	obesity	Projected
Denmark	DNK	Women	2027	std84	0.100153	0.101146	0.102167	obesity	Projected
Denmark	DNK	Women	2028	std84	0.100743	0.101881	0.10306	obesity	Projected
Denmark	DNK	Women	2029	std84	0.101275	0.102569	0.103919	obesity	Projected
Denmark	DNK	Women	2030	std84	0.101753	0.103208	0.104733	obesity	Projected
Denmark	DNK	Women	2031	std84	0.10217	0.103796	0.105503	obesity	Projected
Denmark	DNK	Women	2032	std84	0.102528	0.104331	0.106228	obesity	Projected
Denmark	DNK	Women	2033	std84	0.102825	0.104812	0.106904	obesity	Projected
Denmark	DNK	Women	2034	std84	0.103063	0.105237	0.107531	obesity	Projected
Denmark	DNK	Women	2035	std84	0.103237	0.105603	0.108109	obesity	Projected
Denmark	DNK	Women	2036	std84	0.103345	0.105913	0.108637	obesity	Projected
Denmark	DNK	Women	2037	std84	0.1034	0.106159	0.109095	obesity	Projected
Denmark	DNK	Women	2038	std84	0.103381	0.106344	0.109508	obesity	Projected
Denmark	DNK	Women	2039	std84	0.1033	0.106474	0.109863	obesity	Projected
Denmark	DNK	Women	2040	std84	0.103157	0.106537	0.11016	obesity	Projected
Denmark	DNK	Women	2041	std84	0.102953	0.106541	0.110396	obesity	Projected
Denmark	DNK	Women	2042	std84	0.102682	0.106479	0.110566	obesity	Projected
Denmark	DNK	Women	2043	std84	0.102369	0.106355	0.110667	obesity	Projected
Denmark	DNK	Women	2044	std84	0.101991	0.106169	0.110724	obesity	Projected
Denmark	DNK	Women	2045	std84	0.101556	0.105925	0.110701	obesity	Projected
Denmark	DNK	Women	2046	std84	0.101063	0.105622	0.110632	obesity	Projected
Denmark	DNK	Women	2047	std84	0.10051	0.105261	0.110494	obesity	Projected
Denmark	DNK	Women	2048	std84	0.099915	0.104843	0.110289	obesity	Projected
Denmark	DNK	Women	2049	std84	0.0992686	0.104366	0.110022	obesity	Projected
Denmark	DNK	Women	2050	std84	0.0985704	0.103829	0.109699	obesity	Projected
Denmark	DNK	Women	2051	std84	0.0978306	0.10325	0.10932	obesity	Projected
Denmark	DNK	Women	2052	std84	0.0970352	0.102612	0.108876	obesity	Projected
Denmark	DNK	Women	2053	std84	0.096217	0.101931	0.108386	obesity	Projected
Denmark	DNK	Women	2054	std84	0.095353	0.101205	0.107818	obesity	Projected
Denmark	DNK	Women	2055	std84	0.0944689	0.100426	0.107201	obesity	Projected
Denmark	DNK	Women	2056	std84	0.0935516	0.0996033	0.106547	obesity	Projected
Denmark	DNK	Women	2057	std84	0.0925985	0.0987486	0.105836	obesity	Projected
Denmark	DNK	Women	2058	std84	0.0916226	0.0978568	0.10507	obesity	Projected
Denmark	DNK	Women	2059	std84	0.0906099	0.0969293	0.104262	obesity	Projected
Denmark	DNK	Women	2060	std84	0.0895867	0.0959708	0.103413	obesity	Projected
Denmark	DNK	Women	2061	std84	0.0885422	0.0949765	0.102534	obesity	Projected
Denmark	DNK	Women	2062	std84	0.0874868	0.0939541	0.101612	obesity	Projected
Denmark	DNK	Women	2063	std84	0.0864321	0.09292	0.100646	obesity	Projected
Denmark	DNK	Women	2064	std84	0.0853423	0.0918609	0.0996608	obesity	Projected
Denmark	DNK	Women	2065	std84	0.0842735	0.0907895	0.0986455	obesity	Projected
Denmark		Women	1990	std84		0.293926		lifestyle (combined)	Observed
Denmark		Women	1991	std84		0.306695		lifestyle (combined)	Observed
Denmark		Women	1992	std84		0.30078		lifestyle (combined)	Observed
Denmark		Women	1993	std84		0.316337		lifestyle (combined)	Observed
Denmark		Women	1994	std84		0.333941		lifestyle (combined)	Observed
Denmark		Women	1995	std84		0.33858		lifestyle (combined)	Observed
Denmark		Women	1996	std84		0.332877		lifestyle (combined)	Observed
Denmark		Women	1997	std84		0.354127		lifestyle (combined)	Observed
Denmark		Women	1998	std84		0.34438		lifestyle (combined)	Observed
Denmark		Women	1999	std84		0.354926		lifestyle (combined)	Observed
Denmark		Women	2000	std84		0.354603		lifestyle (combined)	Observed
Denmark		Women	2001	std84		0.360066		lifestyle (combined)	Observed
Denmark		Women	2002	std84		0.356899		lifestyle (combined)	Observed
Denmark		Women	2003	std84		0.365454		lifestyle (combined)	Observed
Denmark		Women	2004	std84		0.37527		lifestyle (combined)	Observed
Denmark		Women	2005	std84		0.38257		lifestyle (combined)	Observed
Denmark		Women	2006	std84		0.383199		lifestyle (combined)	Observed
Denmark		Women	2007	std84		0.363969		lifestyle (combined)	Observed
Denmark		Women	2008	std84		0.380038		lifestyle (combined)	Observed
Denmark		Women	2009	std84		0.377412		lifestyle (combined)	Observed
Denmark		Women	2010	std84		0.379458		lifestyle (combined)	Observed
Denmark		Women	2011	std84		0.373869		lifestyle (combined)	Observed
Denmark		Women	2012	std84		0.372771		lifestyle (combined)	Observed
Denmark		Women	2013	std84		0.368697		lifestyle (combined)	Observed
Denmark		Women	2014	std84		0.36576		lifestyle (combined)	Observed
Denmark		Women	2015	std84		0.365856		lifestyle (combined)	Observed
Denmark		Women	2015	std84		0.365856		lifestyle (combined)	Projected
Denmark		Women	2016	std84		0.361244		lifestyle (combined)	Projected
Denmark		Women	2017	std84		0.355982		lifestyle (combined)	Projected
Denmark		Women	2018	std84		0.35072		lifestyle (combined)	Projected
Denmark		Women	2019	std84		0.344866		lifestyle (combined)	Projected
Denmark		Women	2020	std84		0.338475		lifestyle (combined)	Projected
Denmark		Women	2021	std84		0.33161		lifestyle (combined)	Projected
Denmark		Women	2022	std84		0.324114		lifestyle (combined)	Projected
Denmark		Women	2023	std84		0.316054		lifestyle (combined)	Projected
Denmark		Women	2024	std84		0.308013		lifestyle (combined)	Projected
Denmark		Women	2025	std84		0.299553		lifestyle (combined)	Projected
Denmark		Women	2026	std84		0.290873		lifestyle (combined)	Projected
Denmark		Women	2027	std84		0.282253		lifestyle (combined)	Projected
Denmark		Women	2028	std84		0.273129		lifestyle (combined)	Projected
Denmark		Women	2029	std84		0.26418		lifestyle (combined)	Projected
Denmark		Women	2030	std84		0.255357		lifestyle (combined)	Projected
Denmark		Women	2031	std84		0.246298		lifestyle (combined)	Projected
Denmark		Women	2032	std84		0.237767		lifestyle (combined)	Projected
Denmark		Women	2033	std84		0.229322		lifestyle (combined)	Projected
Denmark		Women	2034	std84		0.221502		lifestyle (combined)	Projected
Denmark		Women	2035	std84		0.213676		lifestyle (combined)	Projected
Denmark		Women	2036	std84		0.206704		lifestyle (combined)	Projected
Denmark		Women	2037	std84		0.200098		lifestyle (combined)	Projected
Denmark		Women	2038	std84		0.193817		lifestyle (combined)	Projected
Denmark		Women	2039	std84		0.188085		lifestyle (combined)	Projected
Denmark		Women	2040	std84		0.182939		lifestyle (combined)	Projected
Denmark		Women	2041	std84		0.178287		lifestyle (combined)	Projected
Denmark		Women	2042	std84		0.17416		lifestyle (combined)	Projected
Denmark		Women	2043	std84		0.170473		lifestyle (combined)	Projected
Denmark		Women	2044	std84		0.167072		lifestyle (combined)	Projected
Denmark		Women	2045	std84		0.164104		lifestyle (combined)	Projected
Denmark		Women	2046	std84		0.161427		lifestyle (combined)	Projected
Denmark		Women	2047	std84		0.159038		lifestyle (combined)	Projected
Denmark		Women	2048	std84		0.156932		lifestyle (combined)	Projected
Denmark		Women	2049	std84		0.154999		lifestyle (combined)	Projected
Denmark		Women	2050	std84		0.153288		lifestyle (combined)	Projected
Denmark		Women	2051	std84		0.151771		lifestyle (combined)	Projected
Denmark		Women	2052	std84		0.150369		lifestyle (combined)	Projected
Denmark		Women	2053	std84		0.149089		lifestyle (combined)	Projected
Denmark		Women	2054	std84		0.147889		lifestyle (combined)	Projected
Denmark		Women	2055	std84		0.146735		lifestyle (combined)	Projected
Denmark		Women	2056	std84		0.145605		lifestyle (combined)	Projected
Denmark		Women	2057	std84		0.144504		lifestyle (combined)	Projected
Denmark		Women	2058	std84		0.143415		lifestyle (combined)	Projected
Denmark		Women	2059	std84		0.142332		lifestyle (combined)	Projected
Denmark		Women	2060	std84		0.141255		lifestyle (combined)	Projected
Denmark		Women	2061	std84		0.140169		lifestyle (combined)	Projected
Denmark		Women	2062	std84		0.139086		lifestyle (combined)	Projected
Denmark		Women	2063	std84		0.138009		lifestyle (combined)	Projected
Denmark		Women	2064	std84		0.136925		lifestyle (combined)	Projected
Denmark		Women	2065	std84		0.135845		lifestyle (combined)	Projected
Finland	FIN	Women	1990	std84		0.0498868		smoking	Observed
Finland	FIN	Women	1991	std84		0.0468629		smoking	Observed
Finland	FIN	Women	1992	std84		0.0547148		smoking	Observed
Finland	FIN	Women	1993	std84		0.0481331		smoking	Observed
Finland	FIN	Women	1994	std84		0.0537394		smoking	Observed
Finland	FIN	Women	1995	std84		0.049364		smoking	Observed
Finland	FIN	Women	1996	std84		0.0557151		smoking	Observed
Finland	FIN	Women	1997	std84		0.0525236		smoking	Observed
Finland	FIN	Women	1998	std84		0.0663266		smoking	Observed
Finland	FIN	Women	1999	std84		0.0583564		smoking	Observed
Finland	FIN	Women	2000	std84		0.0635207		smoking	Observed
Finland	FIN	Women	2001	std84		0.06941		smoking	Observed
Finland	FIN	Women	2002	std84		0.0653816		smoking	Observed
Finland	FIN	Women	2003	std84		0.0750249		smoking	Observed
Finland	FIN	Women	2004	std84		0.0646524		smoking	Observed
Finland	FIN	Women	2005	std84		0.0725744		smoking	Observed
Finland	FIN	Women	2006	std84		0.0739256		smoking	Observed
Finland	FIN	Women	2007	std84		0.0763386		smoking	Observed
Finland	FIN	Women	2008	std84		0.0841742		smoking	Observed
Finland	FIN	Women	2009	std84		0.081345		smoking	Observed
Finland	FIN	Women	2010	std84		0.0945466		smoking	Observed
Finland	FIN	Women	2011	std84		0.0923838		smoking	Observed
Finland	FIN	Women	2012	std84		0.102822		smoking	Observed
Finland	FIN	Women	2013	std84		0.100213		smoking	Observed
Finland	FIN	Women	2014	std84		0.104426		smoking	Observed
Finland	FIN	Women	2015	std84		0.104771		smoking	Observed
Finland	FIN	Women	2016	std84	0.0747801	0.104085	0.144325	smoking	Projected
Finland	FIN	Women	2017	std84	0.0664642	0.105871	0.166457	smoking	Projected
Finland	FIN	Women	2018	std84	0.0612029	0.107623	0.18234	smoking	Projected
Finland	FIN	Women	2019	std84	0.0577118	0.109296	0.196295	smoking	Projected
Finland	FIN	Women	2020	std84	0.054715	0.11049	0.207846	smoking	Projected
Finland	FIN	Women	2021	std84	0.0528139	0.111931	0.216992	smoking	Projected
Finland	FIN	Women	2022	std84	0.0507579	0.113322	0.224151	smoking	Projected
Finland	FIN	Women	2023	std84	0.0491683	0.114493	0.231873	smoking	Projected
Finland	FIN	Women	2024	std84	0.047724	0.115672	0.236999	smoking	Projected
Finland	FIN	Women	2025	std84	0.0466519	0.116278	0.2424	smoking	Projected
Finland	FIN	Women	2026	std84	0.0454983	0.11705	0.246505	smoking	Projected
Finland	FIN	Women	2027	std84	0.0447366	0.117313	0.250137	smoking	Projected
Finland	FIN	Women	2028	std84	0.0438187	0.11803	0.252727	smoking	Projected
Finland	FIN	Women	2029	std84	0.0431398	0.118111	0.255162	smoking	Projected
Finland	FIN	Women	2030	std84	0.0426358	0.118548	0.25793	smoking	Projected
Finland	FIN	Women	2031	std84	0.0418861	0.11824	0.259675	smoking	Projected
Finland	FIN	Women	2032	std84	0.0413439	0.117246	0.261233	smoking	Projected
Finland	FIN	Women	2033	std84	0.0407353	0.11684	0.262947	smoking	Projected
Finland	FIN	Women	2034	std84	0.0403209	0.115762	0.263674	smoking	Projected
Finland	FIN	Women	2035	std84	0.0398708	0.114459	0.264877	smoking	Projected
Finland	FIN	Women	2036	std84	0.0394378	0.112912	0.265196	smoking	Projected
Finland	FIN	Women	2037	std84	0.0389384	0.11078	0.266028	smoking	Projected
Finland	FIN	Women	2038	std84	0.0386117	0.108581	0.267112	smoking	Projected
Finland	FIN	Women	2039	std84	0.0382183	0.106109	0.267473	smoking	Projected
Finland	FIN	Women	2040	std84	0.0379028	0.103028	0.26786	smoking	Projected
Finland	FIN	Women	2041	std84	0.0375704	0.100501	0.268436	smoking	Projected
Finland	FIN	Women	2042	std84	0.0373443	0.0973043	0.268205	smoking	Projected
Finland	FIN	Women	2043	std84	0.0370872	0.094888	0.268163	smoking	Projected
Finland	FIN	Women	2044	std84	0.0368626	0.0915879	0.268507	smoking	Projected
Finland	FIN	Women	2045	std84	0.0366836	0.0881289	0.268659	smoking	Projected
Finland	FIN	Women	2046	std84	0.0365114	0.0846745	0.268365	smoking	Projected
Finland	FIN	Women	2047	std84	0.0363652	0.0816543	0.267541	smoking	Projected
Finland	FIN	Women	2048	std84	0.0362618	0.0785979	0.267654	smoking	Projected
Finland	FIN	Women	2049	std84	0.0361555	0.0758185	0.267265	smoking	Projected
Finland	FIN	Women	2050	std84	0.0360668	0.0735853	0.26715	smoking	Projected
Finland	FIN	Women	2051	std84	0.0359947	0.0712364	0.26672	smoking	Projected
Finland	FIN	Women	2052	std84	0.0359391	0.0689534	0.266679	smoking	Projected
Finland	FIN	Women	2053	std84	0.0358806	0.0665127	0.266053	smoking	Projected
Finland	FIN	Women	2054	std84	0.035844	0.0645685	0.265972	smoking	Projected
Finland	FIN	Women	2055	std84	0.0357942	0.0626738	0.26567	smoking	Projected
Finland	FIN	Women	2056	std84	0.0357579	0.0608469	0.265404	smoking	Projected
Finland	FIN	Women	2057	std84	0.0357277	0.0590182	0.265006	smoking	Projected
Finland	FIN	Women	2058	std84	0.0357042	0.0573508	0.264619	smoking	Projected
Finland	FIN	Women	2059	std84	0.0356795	0.0558636	0.263661	smoking	Projected
Finland	FIN	Women	2060	std84	0.0356608	0.0543829	0.263577	smoking	Projected
Finland	FIN	Women	2061	std84	0.0356415	0.0530205	0.263221	smoking	Projected
Finland	FIN	Women	2062	std84	0.0356275	0.0516505	0.262916	smoking	Projected
Finland	FIN	Women	2063	std84	0.0356156	0.0505243	0.262359	smoking	Projected
Finland	FIN	Women	2064	std84	0.0356035	0.0493352	0.261869	smoking	Projected
Finland	FIN	Women	2065	std84	0.0355929	0.0481802	0.260359	smoking	Projected
Finland	FIN	Women	1990	std84		0.0173947		alcohol	Observed
Finland	FIN	Women	1991	std84		0.0185612		alcohol	Observed
Finland	FIN	Women	1992	std84		0.0194122		alcohol	Observed
Finland	FIN	Women	1993	std84		0.0202033		alcohol	Observed
Finland	FIN	Women	1994	std84		0.0216576		alcohol	Observed
Finland	FIN	Women	1995	std84		0.0224018		alcohol	Observed
Finland	FIN	Women	1996	std84		0.0247321		alcohol	Observed
Finland	FIN	Women	1997	std84		0.0259331		alcohol	Observed
Finland	FIN	Women	1998	std84		0.0276757		alcohol	Observed
Finland	FIN	Women	1999	std84		0.0295517		alcohol	Observed
Finland	FIN	Women	2000	std84		0.0302016		alcohol	Observed
Finland	FIN	Women	2001	std84		0.0320582		alcohol	Observed
Finland	FIN	Women	2002	std84		0.0328159		alcohol	Observed
Finland	FIN	Women	2003	std84		0.0348068		alcohol	Observed
Finland	FIN	Women	2004	std84		0.037027		alcohol	Observed
Finland	FIN	Women	2005	std84		0.0374851		alcohol	Observed
Finland	FIN	Women	2006	std84		0.0387964		alcohol	Observed
Finland	FIN	Women	2007	std84		0.0389989		alcohol	Observed
Finland	FIN	Women	2008	std84		0.0393619		alcohol	Observed
Finland	FIN	Women	2009	std84		0.0393593		alcohol	Observed
Finland	FIN	Women	2010	std84		0.0393821		alcohol	Observed
Finland	FIN	Women	2011	std84		0.0396589		alcohol	Observed
Finland	FIN	Women	2012	std84		0.0395359		alcohol	Observed
Finland	FIN	Women	2013	std84		0.039219		alcohol	Observed
Finland	FIN	Women	2014	std84		0.0384217		alcohol	Observed
Finland	FIN	Women	2015	std84		0.0381983		alcohol	Observed
Finland	FIN	Women	2016	std84	0.0318823	0.0339693	0.0362276	alcohol	Projected
Finland	FIN	Women	2017	std84	0.0292354	0.0327864	0.0368632	alcohol	Projected
Finland	FIN	Women	2018	std84	0.0266587	0.0312198	0.0367407	alcohol	Projected
Finland	FIN	Women	2019	std84	0.024235	0.0294296	0.036026	alcohol	Projected
Finland	FIN	Women	2020	std84	0.0220259	0.0275379	0.0349268	alcohol	Projected
Finland	FIN	Women	2021	std84	0.0200075	0.0256422	0.0335042	alcohol	Projected
Finland	FIN	Women	2022	std84	0.0182007	0.0237644	0.0317757	alcohol	Projected
Finland	FIN	Women	2023	std84	0.0165555	0.0219369	0.029926	alcohol	Projected
Finland	FIN	Women	2024	std84	0.0151047	0.020188	0.0280111	alcohol	Projected
Finland	FIN	Women	2025	std84	0.0138422	0.0185263	0.0261213	alcohol	Projected
Finland	FIN	Women	2026	std84	0.012718	0.0169867	0.0240991	alcohol	Projected
Finland	FIN	Women	2027	std84	0.0117228	0.015572	0.0221843	alcohol	Projected
Finland	FIN	Women	2028	std84	0.0108767	0.0142937	0.0203688	alcohol	Projected
Finland	FIN	Women	2029	std84	0.01014	0.0131427	0.0186076	alcohol	Projected
Finland	FIN	Women	2030	std84	0.00950496	0.0121243	0.0170344	alcohol	Projected
Finland	FIN	Women	2031	std84	0.00897549	0.0112319	0.0155708	alcohol	Projected
Finland	FIN	Women	2032	std84	0.00852496	0.0104562	0.0142682	alcohol	Projected
Finland	FIN	Women	2033	std84	0.00815185	0.00978527	0.013094	alcohol	Projected
Finland	FIN	Women	2034	std84	0.00784484	0.00921126	0.0120553	alcohol	Projected
Finland	FIN	Women	2035	std84	0.00759374	0.00872385	0.0111409	alcohol	Projected
Finland	FIN	Women	2036	std84	0.00738649	0.00831653	0.0103321	alcohol	Projected
Finland	FIN	Women	2037	std84	0.00721896	0.00797822	0.00965783	alcohol	Projected
Finland	FIN	Women	2038	std84	0.00708368	0.00770063	0.00909936	alcohol	Projected
Finland	FIN	Women	2039	std84	0.00697625	0.00747122	0.0086136	alcohol	Projected
Finland	FIN	Women	2040	std84	0.00688947	0.00728438	0.00822477	alcohol	Projected
Finland	FIN	Women	2041	std84	0.00682186	0.00713486	0.00789331	alcohol	Projected
Finland	FIN	Women	2042	std84	0.00676875	0.00701502	0.00762047	alcohol	Projected
Finland	FIN	Women	2043	std84	0.00672735	0.00691981	0.00740229	alcohol	Projected
Finland	FIN	Women	2044	std84	0.00669586	0.00684513	0.00722319	alcohol	Projected
Finland	FIN	Women	2045	std84	0.00667203	0.00678633	0.00708427	alcohol	Projected
Finland	FIN	Women	2046	std84	0.00665348	0.00674072	0.00697183	alcohol	Projected
Finland	FIN	Women	2047	std84	0.00663949	0.00670553	0.00688376	alcohol	Projected
Finland	FIN	Women	2048	std84	0.006629	0.00667863	0.0068151	alcohol	Projected
Finland	FIN	Women	2049	std84	0.00662097	0.00665832	0.00676177	alcohol	Projected
Finland	FIN	Women	2050	std84	0.00661518	0.00664288	0.00672063	alcohol	Projected
Finland	FIN	Women	2051	std84	0.00661092	0.00663138	0.00668961	alcohol	Projected
Finland	FIN	Women	2052	std84	0.0066078	0.00662274	0.00666618	alcohol	Projected
Finland	FIN	Women	2053	std84	0.00660553	0.00661639	0.00664856	alcohol	Projected
Finland	FIN	Women	2054	std84	0.0066039	0.00661171	0.00663534	alcohol	Projected
Finland	FIN	Women	2055	std84	0.00660273	0.00660832	0.00662549	alcohol	Projected
Finland	FIN	Women	2056	std84	0.00660189	0.00660587	0.00661822	alcohol	Projected
Finland	FIN	Women	2057	std84	0.0066013	0.00660411	0.00661299	alcohol	Projected
Finland	FIN	Women	2058	std84	0.0066009	0.00660286	0.00660916	alcohol	Projected
Finland	FIN	Women	2059	std84	0.00660061	0.00660198	0.00660643	alcohol	Projected
Finland	FIN	Women	2060	std84	0.00660041	0.00660136	0.00660446	alcohol	Projected
Finland	FIN	Women	2061	std84	0.00660028	0.00660093	0.0066031	alcohol	Projected
Finland	FIN	Women	2062	std84	0.00660018	0.00660063	0.00660214	alcohol	Projected
Finland	FIN	Women	2063	std84	0.00660012	0.00660042	0.00660146	alcohol	Projected
Finland	FIN	Women	2064	std84	0.00660008	0.00660028	0.00660099	alcohol	Projected
Finland	FIN	Women	2065	std84	0.00660005	0.00660019	0.00660067	alcohol	Projected
Finland	FIN	Women	1990	std84		0.0819745		obesity	Observed
Finland	FIN	Women	1991	std84		0.0838532		obesity	Observed
Finland	FIN	Women	1992	std84		0.0856681		obesity	Observed
Finland	FIN	Women	1993	std84		0.087424		obesity	Observed
Finland	FIN	Women	1994	std84		0.0891295		obesity	Observed
Finland	FIN	Women	1995	std84		0.0907907		obesity	Observed
Finland	FIN	Women	1996	std84		0.0923978		obesity	Observed
Finland	FIN	Women	1997	std84		0.0939614		obesity	Observed
Finland	FIN	Women	1998	std84		0.0954809		obesity	Observed
Finland	FIN	Women	1999	std84		0.0969679		obesity	Observed
Finland	FIN	Women	2000	std84		0.0984243		obesity	Observed
Finland	FIN	Women	2001	std84		0.0998404		obesity	Observed
Finland	FIN	Women	2002	std84		0.101214		obesity	Observed
Finland	FIN	Women	2003	std84		0.102548		obesity	Observed
Finland	FIN	Women	2004	std84		0.10385		obesity	Observed
Finland	FIN	Women	2005	std84		0.105115		obesity	Observed
Finland	FIN	Women	2006	std84		0.106355		obesity	Observed
Finland	FIN	Women	2007	std84		0.107572		obesity	Observed
Finland	FIN	Women	2008	std84		0.108765		obesity	Observed
Finland	FIN	Women	2009	std84		0.109946		obesity	Observed
Finland	FIN	Women	2010	std84		0.111118		obesity	Observed
Finland	FIN	Women	2011	std84		0.112279		obesity	Observed
Finland	FIN	Women	2012	std84		0.113438		obesity	Observed
Finland	FIN	Women	2013	std84		0.1146		obesity	Observed
Finland	FIN	Women	2014	std84		0.115767		obesity	Observed
Finland	FIN	Women	2015	std84		0.116938		obesity	Observed
Finland	FIN	Women	2016	std84		0.118123		obesity	Observed
Finland	FIN	Women	2017	std84	0.119398	0.119475	0.119552	obesity	Projected
Finland	FIN	Women	2018	std84	0.120449	0.120623	0.120799	obesity	Projected
Finland	FIN	Women	2019	std84	0.121438	0.121734	0.122032	obesity	Projected
Finland	FIN	Women	2020	std84	0.122361	0.122801	0.123247	obesity	Projected
Finland	FIN	Women	2021	std84	0.123218	0.123827	0.124439	obesity	Projected
Finland	FIN	Women	2022	std84	0.124011	0.124803	0.125606	obesity	Projected
Finland	FIN	Women	2023	std84	0.124737	0.125732	0.126745	obesity	Projected
Finland	FIN	Women	2024	std84	0.125394	0.126607	0.127843	obesity	Projected
Finland	FIN	Women	2025	std84	0.125985	0.127429	0.12891	obesity	Projected
Finland	FIN	Women	2026	std84	0.126511	0.128197	0.129942	obesity	Projected
Finland	FIN	Women	2027	std84	0.126962	0.128905	0.130933	obesity	Projected
Finland	FIN	Women	2028	std84	0.127341	0.129554	0.131882	obesity	Projected
Finland	FIN	Women	2029	std84	0.127647	0.130145	0.132777	obesity	Projected
Finland	FIN	Women	2030	std84	0.127872	0.13067	0.133639	obesity	Projected
Finland	FIN	Women	2031	std84	0.128019	0.13113	0.134436	obesity	Projected
Finland	FIN	Women	2032	std84	0.128084	0.131529	0.135178	obesity	Projected
Finland	FIN	Women	2033	std84	0.128087	0.13186	0.135867	obesity	Projected
Finland	FIN	Women	2034	std84	0.128019	0.132126	0.136491	obesity	Projected
Finland	FIN	Women	2035	std84	0.127866	0.132319	0.137076	obesity	Projected
Finland	FIN	Women	2036	std84	0.127669	0.132443	0.137585	obesity	Projected
Finland	FIN	Women	2037	std84	0.127391	0.132499	0.138044	obesity	Projected
Finland	FIN	Women	2038	std84	0.127046	0.132482	0.138423	obesity	Projected
Finland	FIN	Women	2039	std84	0.126607	0.132397	0.138752	obesity	Projected
Finland	FIN	Women	2040	std84	0.126109	0.132241	0.139008	obesity	Projected
Finland	FIN	Women	2041	std84	0.125535	0.132026	0.139195	obesity	Projected
Finland	FIN	Women	2042	std84	0.12491	0.131738	0.139315	obesity	Projected
Finland	FIN	Women	2043	std84	0.124219	0.131382	0.139383	obesity	Projected
Finland	FIN	Women	2044	std84	0.123459	0.130962	0.139376	obesity	Projected
Finland	FIN	Women	2045	std84	0.122644	0.130479	0.139276	obesity	Projected
Finland	FIN	Women	2046	std84	0.121774	0.129928	0.139142	obesity	Projected
Finland	FIN	Women	2047	std84	0.120853	0.129315	0.138963	obesity	Projected
Finland	FIN	Women	2048	std84	0.119885	0.128643	0.138724	obesity	Projected
Finland	FIN	Women	2049	std84	0.118872	0.127913	0.138392	obesity	Projected
Finland	FIN	Women	2050	std84	0.117806	0.127123	0.137968	obesity	Projected
Finland	FIN	Women	2051	std84	0.116706	0.12628	0.137471	obesity	Projected
Finland	FIN	Women	2052	std84	0.115547	0.125381	0.136919	obesity	Projected
Finland	FIN	Women	2053	std84	0.114358	0.124438	0.13634	obesity	Projected
Finland	FIN	Women	2054	std84	0.113153	0.123452	0.135713	obesity	Projected
Finland	FIN	Women	2055	std84	0.111893	0.122411	0.135012	obesity	Projected
Finland	FIN	Women	2056	std84	0.110634	0.121315	0.134227	obesity	Projected
Finland	FIN	Women	2057	std84	0.109325	0.120185	0.133427	obesity	Projected
Finland	FIN	Women	2058	std84	0.108002	0.11903	0.132547	obesity	Projected
Finland	FIN	Women	2059	std84	0.106661	0.117834	0.1316	obesity	Projected
Finland	FIN	Women	2060	std84	0.10531	0.116601	0.130629	obesity	Projected
Finland	FIN	Women	2061	std84	0.103968	0.115345	0.129579	obesity	Projected
Finland	FIN	Women	2062	std84	0.102615	0.114063	0.128475	obesity	Projected
Finland	FIN	Women	2063	std84	0.101234	0.11276	0.127339	obesity	Projected
Finland	FIN	Women	2064	std84	0.0998777	0.111428	0.126151	obesity	Projected
Finland	FIN	Women	2065	std84	0.098504	0.11008	0.12494	obesity	Projected
Finland		Women	1990	std84		0.142944		lifestyle (combined)	Observed
Finland		Women	1991	std84		0.142994		lifestyle (combined)	Observed
Finland		Women	1992	std84		0.152474		lifestyle (combined)	Observed
Finland		Women	1993	std84		0.148899		lifestyle (combined)	Observed
Finland		Women	1994	std84		0.156746		lifestyle (combined)	Observed
Finland		Women	1995	std84		0.155035		lifestyle (combined)	Observed
Finland		Women	1996	std84		0.164161		lifestyle (combined)	Observed
Finland		Women	1997	std84		0.163812		lifestyle (combined)	Observed
Finland		Women	1998	std84		0.178847		lifestyle (combined)	Observed
Finland		Women	1999	std84		0.174794		lifestyle (combined)	Observed
Finland		Women	2000	std84		0.181192		lifestyle (combined)	Observed
Finland		Women	2001	std84		0.189175		lifestyle (combined)	Observed
Finland		Women	2002	std84		0.187544		lifestyle (combined)	Observed
Finland		Women	2003	std84		0.198773		lifestyle (combined)	Observed
Finland		Women	2004	std84		0.192825		lifestyle (combined)	Observed
Finland		Women	2005	std84		0.201171		lifestyle (combined)	Observed
Finland		Women	2006	std84		0.204525		lifestyle (combined)	Observed
Finland		Women	2007	std84		0.207845		lifestyle (combined)	Observed
Finland		Women	2008	std84		0.215912		lifestyle (combined)	Observed
Finland		Women	2009	std84		0.21453		lifestyle (combined)	Observed
Finland		Women	2010	std84		0.226855		lifestyle (combined)	Observed
Finland		Women	2011	std84		0.226244		lifestyle (combined)	Observed
Finland		Women	2012	std84		0.236043		lifestyle (combined)	Observed
Finland		Women	2013	std84		0.234573		lifestyle (combined)	Observed
Finland		Women	2014	std84		0.23853		lifestyle (combined)	Observed
Finland		Women	2015	std84		0.239654		lifestyle (combined)	Observed
Finland		Women	2015	std84		0.239654		lifestyle (combined)	Projected
Finland		Women	2016	std84		0.236752		lifestyle (combined)	Projected
Finland		Women	2017	std84		0.238509		lifestyle (combined)	Projected
Finland		Women	2018	std84		0.239764		lifestyle (combined)	Projected
Finland		Women	2019	std84		0.240747		lifestyle (combined)	Projected
Finland		Women	2020	std84		0.24121		lifestyle (combined)	Projected
Finland		Women	2021	std84		0.24185		lifestyle (combined)	Projected
Finland		Women	2022	std84		0.242423		lifestyle (combined)	Projected
Finland		Women	2023	std84		0.242812		lifestyle (combined)	Projected
Finland		Women	2024	std84		0.243227		lifestyle (combined)	Projected
Finland		Women	2025	std84		0.243175		lifestyle (combined)	Projected
Finland		Women	2026	std84		0.243317		lifestyle (combined)	Projected
Finland		Women	2027	std84		0.243069		lifestyle (combined)	Projected
Finland		Women	2028	std84		0.243266		lifestyle (combined)	Projected
Finland		Women	2029	std84		0.242966		lifestyle (combined)	Projected
Finland		Women	2030	std84		0.243018		lifestyle (combined)	Projected
Finland		Women	2031	std84		0.24247		lifestyle (combined)	Projected
Finland		Women	2032	std84		0.24137		lifestyle (combined)	Projected
Finland		Women	2033	std84		0.240796		lifestyle (combined)	Projected
Finland		Women	2034	std84		0.239661		lifestyle (combined)	Projected
Finland		Women	2035	std84		0.238336		lifestyle (combined)	Projected
Finland		Women	2036	std84		0.236801		lifestyle (combined)	Projected
Finland		Women	2037	std84		0.234755		lifestyle (combined)	Projected
Finland		Women	2038	std84		0.232633		lifestyle (combined)	Projected
Finland		Women	2039	std84		0.230252		lifestyle (combined)	Projected
Finland		Women	2040	std84		0.227315		lifestyle (combined)	Projected
Finland		Women	2041	std84		0.224829		lifestyle (combined)	Projected
Finland		Women	2042	std84		0.221722		lifestyle (combined)	Projected
Finland		Women	2043	std84		0.219243		lifestyle (combined)	Projected
Finland		Women	2044	std84		0.215959		lifestyle (combined)	Projected
Finland		Women	2045	std84		0.21249		lifestyle (combined)	Projected
Finland		Women	2046	std84		0.208969		lifestyle (combined)	Projected
Finland		Women	2047	std84		0.205772		lifestyle (combined)	Projected
Finland		Women	2048	std84		0.202492		lifestyle (combined)	Projected
Finland		Women	2049	std84		0.1994		lifestyle (combined)	Projected
Finland		Women	2050	std84		0.196726		lifestyle (combined)	Projected
Finland		Women	2051	std84		0.193902		lifestyle (combined)	Projected
Finland		Women	2052	std84		0.191082		lifestyle (combined)	Projected
Finland		Women	2053	std84		0.188081		lifestyle (combined)	Projected
Finland		Women	2054	std84		0.185471		lifestyle (combined)	Projected
Finland		Women	2055	std84		0.182848		lifestyle (combined)	Projected
Finland		Women	2056	std84		0.180232		lifestyle (combined)	Projected
Finland		Women	2057	std84		0.177578		lifestyle (combined)	Projected
Finland		Women	2058	std84		0.175037		lifestyle (combined)	Projected
Finland		Women	2059	std84		0.172614		lifestyle (combined)	Projected
Finland		Women	2060	std84		0.170157		lifestyle (combined)	Projected
Finland		Women	2061	std84		0.167779		lifestyle (combined)	Projected
Finland		Women	2062	std84		0.165368		lifestyle (combined)	Projected
Finland		Women	2063	std84		0.163148		lifestyle (combined)	Projected
Finland		Women	2064	std84		0.160841		lifestyle (combined)	Projected
Finland		Women	2065	std84		0.158547		lifestyle (combined)	Projected
France	FRATNP	Women	1990	std84		0.0192898		smoking	Observed
France	FRATNP	Women	1991	std84		0.023035		smoking	Observed
France	FRATNP	Women	1992	std84		0.0221887		smoking	Observed
France	FRATNP	Women	1993	std84		0.026423		smoking	Observed
France	FRATNP	Women	1994	std84		0.0269333		smoking	Observed
France	FRATNP	Women	1995	std84		0.0323012		smoking	Observed
France	FRATNP	Women	1996	std84		0.0359848		smoking	Observed
France	FRATNP	Women	1997	std84		0.0339997		smoking	Observed
France	FRATNP	Women	1998	std84		0.0414973		smoking	Observed
France	FRATNP	Women	1999	std84		0.0431848		smoking	Observed
France	FRATNP	Women	2000	std84		0.0396114		smoking	Observed
France	FRATNP	Women	2001	std84		0.0417552		smoking	Observed
France	FRATNP	Women	2002	std84		0.0494283		smoking	Observed
France	FRATNP	Women	2003	std84		0.0522739		smoking	Observed
France	FRATNP	Women	2004	std84		0.0553739		smoking	Observed
France	FRATNP	Women	2005	std84		0.063318		smoking	Observed
France	FRATNP	Women	2006	std84		0.0656039		smoking	Observed
France	FRATNP	Women	2007	std84		0.0672497		smoking	Observed
France	FRATNP	Women	2008	std84		0.0720733		smoking	Observed
France	FRATNP	Women	2009	std84		0.0783905		smoking	Observed
France	FRATNP	Women	2010	std84		0.0779679		smoking	Observed
France	FRATNP	Women	2011	std84		0.0814963		smoking	Observed
France	FRATNP	Women	2012	std84		0.0884658		smoking	Observed
France	FRATNP	Women	2013	std84		0.0847934		smoking	Observed
France	FRATNP	Women	2014	std84		0.0972764		smoking	Observed
France	FRATNP	Women	2015	std84		0.0987284		smoking	Observed
France	FRATNP	Women	2016	std84	0.072485	0.0979804	0.137031	smoking	Projected
France	FRATNP	Women	2017	std84	0.0655891	0.0988948	0.160939	smoking	Projected
France	FRATNP	Women	2018	std84	0.0585164	0.0982382	0.18906	smoking	Projected
France	FRATNP	Women	2019	std84	0.0531729	0.0968157	0.219958	smoking	Projected
France	FRATNP	Women	2020	std84	0.0506754	0.0948807	0.239684	smoking	Projected
France	FRATNP	Women	2021	std84	0.0492957	0.0929322	0.253096	smoking	Projected
France	FRATNP	Women	2022	std84	0.0484731	0.0911682	0.260805	smoking	Projected
France	FRATNP	Women	2023	std84	0.0479913	0.0885166	0.266142	smoking	Projected
France	FRATNP	Women	2024	std84	0.0476261	0.0860516	0.268714	smoking	Projected
France	FRATNP	Women	2025	std84	0.0474014	0.0832244	0.270336	smoking	Projected
France	FRATNP	Women	2026	std84	0.0472315	0.0800236	0.270769	smoking	Projected
France	FRATNP	Women	2027	std84	0.0471022	0.0766116	0.270138	smoking	Projected
France	FRATNP	Women	2028	std84	0.0470212	0.0733282	0.269089	smoking	Projected
France	FRATNP	Women	2029	std84	0.0469603	0.0701574	0.267018	smoking	Projected
France	FRATNP	Women	2030	std84	0.0469156	0.066858	0.264942	smoking	Projected
France	FRATNP	Women	2031	std84	0.0468869	0.063693	0.261734	smoking	Projected
France	FRATNP	Women	2032	std84	0.0468656	0.0608591	0.258019	smoking	Projected
France	FRATNP	Women	2033	std84	0.0468509	0.0584913	0.253471	smoking	Projected
France	FRATNP	Women	2034	std84	0.0468416	0.056106	0.249259	smoking	Projected
France	FRATNP	Women	2035	std84	0.0468353	0.0542701	0.24445	smoking	Projected
France	FRATNP	Women	2036	std84	0.0468308	0.0527318	0.239465	smoking	Projected
France	FRATNP	Women	2037	std84	0.046828	0.0513787	0.233691	smoking	Projected
France	FRATNP	Women	2038	std84	0.0468263	0.0503043	0.22704	smoking	Projected
France	FRATNP	Women	2039	std84	0.046825	0.0494567	0.220646	smoking	Projected
France	FRATNP	Women	2040	std84	0.0468242	0.0487834	0.214876	smoking	Projected
France	FRATNP	Women	2041	std84	0.0468236	0.0482513	0.207674	smoking	Projected
France	FRATNP	Women	2042	std84	0.0468233	0.0478784	0.201413	smoking	Projected
France	FRATNP	Women	2043	std84	0.0468231	0.0475796	0.193755	smoking	Projected
France	FRATNP	Women	2044	std84	0.046823	0.0473658	0.186915	smoking	Projected
France	FRATNP	Women	2045	std84	0.0468229	0.0472115	0.178456	smoking	Projected
France	FRATNP	Women	2046	std84	0.0468229	0.047093	0.169098	smoking	Projected
France	FRATNP	Women	2047	std84	0.0468229	0.0470051	0.158916	smoking	Projected
France	FRATNP	Women	2048	std84	0.0468229	0.0469434	0.148441	smoking	Projected
France	FRATNP	Women	2049	std84	0.0468228	0.0469003	0.136606	smoking	Projected
France	FRATNP	Women	2050	std84	0.0468228	0.046871	0.124825	smoking	Projected
France	FRATNP	Women	2051	std84	0.0468228	0.0468515	0.112202	smoking	Projected
France	FRATNP	Women	2052	std84	0.0468228	0.0468398	0.100749	smoking	Projected
France	FRATNP	Women	2053	std84	0.0468228	0.0468325	0.0890035	smoking	Projected
France	FRATNP	Women	2054	std84	0.0468228	0.0468281	0.0785955	smoking	Projected
France	FRATNP	Women	2055	std84	0.0468228	0.0468256	0.0691635	smoking	Projected
France	FRATNP	Women	2056	std84	0.0468228	0.0468242	0.0613762	smoking	Projected
France	FRATNP	Women	2057	std84	0.0468228	0.0468235	0.055228	smoking	Projected
France	FRATNP	Women	2058	std84	0.0468228	0.0468231	0.0514947	smoking	Projected
France	FRATNP	Women	2059	std84	0.0468228	0.046823	0.049452	smoking	Projected
France	FRATNP	Women	2060	std84	0.0468228	0.0468229	0.0482096	smoking	Projected
France	FRATNP	Women	2061	std84	0.0468228	0.0468229	0.0475629	smoking	Projected
France	FRATNP	Women	2062	std84	0.0468228	0.0468228	0.0472212	smoking	Projected
France	FRATNP	Women	2063	std84	0.0468228	0.0468228	0.0470457	smoking	Projected
France	FRATNP	Women	2064	std84	0.0468228	0.0468228	0.0469453	smoking	Projected
France	FRATNP	Women	2065	std84	0.0468228	0.0468228	0.0468941	smoking	Projected
France	FRATNP	Women	1990	std84		0.0630349		alcohol	Observed
France	FRATNP	Women	1991	std84		0.06163		alcohol	Observed
France	FRATNP	Women	1992	std84		0.060864		alcohol	Observed
France	FRATNP	Women	1993	std84		0.0595866		alcohol	Observed
France	FRATNP	Women	1994	std84		0.0582153		alcohol	Observed
France	FRATNP	Women	1995	std84		0.0571358		alcohol	Observed
France	FRATNP	Women	1996	std84		0.0554323		alcohol	Observed
France	FRATNP	Women	1997	std84		0.0550946		alcohol	Observed
France	FRATNP	Women	1998	std84		0.0559706		alcohol	Observed
France	FRATNP	Women	1999	std84		0.0556744		alcohol	Observed
France	FRATNP	Women	2000	std84		0.0550082		alcohol	Observed
France	FRATNP	Women	2001	std84		0.0547617		alcohol	Observed
France	FRATNP	Women	2002	std84		0.0543186		alcohol	Observed
France	FRATNP	Women	2003	std84		0.0532972		alcohol	Observed
France	FRATNP	Women	2004	std84		0.0539028		alcohol	Observed
France	FRATNP	Women	2005	std84		0.0529923		alcohol	Observed
France	FRATNP	Women	2006	std84		0.0528032		alcohol	Observed
France	FRATNP	Women	2007	std84		0.0520412		alcohol	Observed
France	FRATNP	Women	2008	std84		0.0510151		alcohol	Observed
France	FRATNP	Women	2009	std84		0.0502769		alcohol	Observed
France	FRATNP	Women	2010	std84		0.0493812		alcohol	Observed
France	FRATNP	Women	2011	std84		0.0490332		alcohol	Observed
France	FRATNP	Women	2012	std84		0.0468345		alcohol	Observed
France	FRATNP	Women	2013	std84		0.0455175		alcohol	Observed
France	FRATNP	Women	2014	std84		0.0450138		alcohol	Observed
France	FRATNP	Women	2015	std84		0.0432827		alcohol	Observed
France	FRATNP	Women	2016	std84	0.0417882	0.0427338	0.0437091	alcohol	Projected
France	FRATNP	Women	2017	std84	0.0407601	0.0420718	0.043436	alcohol	Projected
France	FRATNP	Women	2018	std84	0.039877	0.0414396	0.0430759	alcohol	Projected
France	FRATNP	Women	2019	std84	0.0390778	0.0408288	0.0427288	alcohol	Projected
France	FRATNP	Women	2020	std84	0.0383431	0.0402498	0.0423135	alcohol	Projected
France	FRATNP	Women	2021	std84	0.0376263	0.0396942	0.0419096	alcohol	Projected
France	FRATNP	Women	2022	std84	0.0369652	0.0391658	0.0415224	alcohol	Projected
France	FRATNP	Women	2023	std84	0.0363635	0.0386526	0.0411621	alcohol	Projected
France	FRATNP	Women	2024	std84	0.0357469	0.0381546	0.0407737	alcohol	Projected
France	FRATNP	Women	2025	std84	0.0351922	0.0376783	0.0403854	alcohol	Projected
France	FRATNP	Women	2026	std84	0.0346577	0.0372276	0.0400335	alcohol	Projected
France	FRATNP	Women	2027	std84	0.0341622	0.0367814	0.0396721	alcohol	Projected
France	FRATNP	Women	2028	std84	0.0336592	0.0363571	0.0393167	alcohol	Projected
France	FRATNP	Women	2029	std84	0.0331899	0.0359361	0.0389725	alcohol	Projected
France	FRATNP	Women	2030	std84	0.032736	0.0355305	0.038633	alcohol	Projected
France	FRATNP	Women	2031	std84	0.0322925	0.0351291	0.038287	alcohol	Projected
France	FRATNP	Women	2032	std84	0.0318705	0.0347435	0.0379647	alcohol	Projected
France	FRATNP	Women	2033	std84	0.0314607	0.0343597	0.0376372	alcohol	Projected
France	FRATNP	Women	2034	std84	0.0310424	0.0339763	0.0372912	alcohol	Projected
France	FRATNP	Women	2035	std84	0.0306381	0.0336033	0.0369406	alcohol	Projected
France	FRATNP	Women	2036	std84	0.0302507	0.0332335	0.0366235	alcohol	Projected
France	FRATNP	Women	2037	std84	0.0298768	0.0328667	0.0363007	alcohol	Projected
France	FRATNP	Women	2038	std84	0.0294797	0.0325037	0.035969	alcohol	Projected
France	FRATNP	Women	2039	std84	0.0291122	0.0321566	0.0356479	alcohol	Projected
France	FRATNP	Women	2040	std84	0.028764	0.0318067	0.0353374	alcohol	Projected
France	FRATNP	Women	2041	std84	0.0284026	0.0314696	0.0350238	alcohol	Projected
France	FRATNP	Women	2042	std84	0.0280709	0.0311386	0.0347157	alcohol	Projected
France	FRATNP	Women	2043	std84	0.0277349	0.0308053	0.0344073	alcohol	Projected
France	FRATNP	Women	2044	std84	0.0274003	0.0304742	0.0340864	alcohol	Projected
France	FRATNP	Women	2045	std84	0.0270534	0.0301384	0.0337733	alcohol	Projected
France	FRATNP	Women	2046	std84	0.0267263	0.0298215	0.0334757	alcohol	Projected
France	FRATNP	Women	2047	std84	0.0264024	0.0295047	0.033137	alcohol	Projected
France	FRATNP	Women	2048	std84	0.0260758	0.0291786	0.0328259	alcohol	Projected
France	FRATNP	Women	2049	std84	0.0257651	0.0288502	0.0324931	alcohol	Projected
France	FRATNP	Women	2050	std84	0.0254423	0.0285228	0.0321768	alcohol	Projected
France	FRATNP	Women	2051	std84	0.0251285	0.0281923	0.0318537	alcohol	Projected
France	FRATNP	Women	2052	std84	0.0247935	0.0278659	0.0314982	alcohol	Projected
France	FRATNP	Women	2053	std84	0.0244986	0.0275433	0.0311709	alcohol	Projected
France	FRATNP	Women	2054	std84	0.0241951	0.0272161	0.030834	alcohol	Projected
France	FRATNP	Women	2055	std84	0.0238579	0.0268938	0.0304878	alcohol	Projected
France	FRATNP	Women	2056	std84	0.0235677	0.0265652	0.0301545	alcohol	Projected
France	FRATNP	Women	2057	std84	0.0232812	0.026247	0.0298312	alcohol	Projected
France	FRATNP	Women	2058	std84	0.0229758	0.025932	0.0294971	alcohol	Projected
France	FRATNP	Women	2059	std84	0.0226903	0.0256204	0.0291727	alcohol	Projected
France	FRATNP	Women	2060	std84	0.0223977	0.0253213	0.0288246	alcohol	Projected
France	FRATNP	Women	2061	std84	0.0221343	0.0250188	0.0285197	alcohol	Projected
France	FRATNP	Women	2062	std84	0.0218621	0.0247234	0.0282148	alcohol	Projected
France	FRATNP	Women	2063	std84	0.0216104	0.0244306	0.0278899	alcohol	Projected
France	FRATNP	Women	2064	std84	0.021351	0.0241605	0.0275806	alcohol	Projected
France	FRATNP	Women	2065	std84	0.0211001	0.0238792	0.0272605	alcohol	Projected
France	FRATNP	Women	1990	std84		0.0734823		obesity	Observed
France	FRATNP	Women	1991	std84		0.0745769		obesity	Observed
France	FRATNP	Women	1992	std84		0.07569		obesity	Observed
France	FRATNP	Women	1993	std84		0.0768214		obesity	Observed
France	FRATNP	Women	1994	std84		0.0779716		obesity	Observed
France	FRATNP	Women	1995	std84		0.079131		obesity	Observed
France	FRATNP	Women	1996	std84		0.08031		obesity	Observed
France	FRATNP	Women	1997	std84		0.0814996		obesity	Observed
France	FRATNP	Women	1998	std84		0.0826902		obesity	Observed
France	FRATNP	Women	1999	std84		0.0838771		obesity	Observed
France	FRATNP	Women	2000	std84		0.085054		obesity	Observed
France	FRATNP	Women	2001	std84		0.0862324		obesity	Observed
France	FRATNP	Women	2002	std84		0.0873998		obesity	Observed
France	FRATNP	Women	2003	std84		0.0885607		obesity	Observed
France	FRATNP	Women	2004	std84		0.089704		obesity	Observed
France	FRATNP	Women	2005	std84		0.0908294		obesity	Observed
France	FRATNP	Women	2006	std84		0.0919361		obesity	Observed
France	FRATNP	Women	2007	std84		0.0930235		obesity	Observed
France	FRATNP	Women	2008	std84		0.094098		obesity	Observed
France	FRATNP	Women	2009	std84		0.0951608		obesity	Observed
France	FRATNP	Women	2010	std84		0.0962179		obesity	Observed
France	FRATNP	Women	2011	std84		0.0972622		obesity	Observed
France	FRATNP	Women	2012	std84		0.0982998		obesity	Observed
France	FRATNP	Women	2013	std84		0.0993309		obesity	Observed
France	FRATNP	Women	2014	std84		0.100361		obesity	Observed
France	FRATNP	Women	2015	std84		0.101393		obesity	Observed
France	FRATNP	Women	2016	std84		0.102427		obesity	Observed
France	FRATNP	Women	2017	std84	0.103676	0.103729	0.103784	obesity	Projected
France	FRATNP	Women	2018	std84	0.104613	0.104736	0.10486	obesity	Projected
France	FRATNP	Women	2019	std84	0.10549	0.105701	0.105914	obesity	Projected
France	FRATNP	Women	2020	std84	0.106306	0.106621	0.106938	obesity	Projected
France	FRATNP	Women	2021	std84	0.107059	0.107493	0.107932	obesity	Projected
France	FRATNP	Women	2022	std84	0.107746	0.108313	0.108886	obesity	Projected
France	FRATNP	Women	2023	std84	0.108367	0.109078	0.109801	obesity	Projected
France	FRATNP	Women	2024	std84	0.108914	0.109784	0.110669	obesity	Projected
France	FRATNP	Women	2025	std84	0.10939	0.110429	0.111492	obesity	Projected
France	FRATNP	Women	2026	std84	0.109798	0.111011	0.112262	obesity	Projected
France	FRATNP	Women	2027	std84	0.110121	0.111528	0.112982	obesity	Projected
France	FRATNP	Women	2028	std84	0.110367	0.111975	0.113637	obesity	Projected
France	FRATNP	Women	2029	std84	0.110529	0.112348	0.114225	obesity	Projected
France	FRATNP	Women	2030	std84	0.110614	0.112651	0.114754	obesity	Projected
France	FRATNP	Women	2031	std84	0.110627	0.112881	0.115214	obesity	Projected
France	FRATNP	Women	2032	std84	0.110578	0.113039	0.115613	obesity	Projected
France	FRATNP	Women	2033	std84	0.110429	0.11312	0.115942	obesity	Projected
France	FRATNP	Women	2034	std84	0.110219	0.113126	0.116208	obesity	Projected
France	FRATNP	Women	2035	std84	0.109917	0.113052	0.116392	obesity	Projected
France	FRATNP	Women	2036	std84	0.10955	0.112907	0.116506	obesity	Projected
France	FRATNP	Women	2037	std84	0.109111	0.112692	0.116547	obesity	Projected
France	FRATNP	Women	2038	std84	0.108595	0.112402	0.11652	obesity	Projected
France	FRATNP	Women	2039	std84	0.108012	0.112039	0.116404	obesity	Projected
France	FRATNP	Women	2040	std84	0.107364	0.111606	0.116229	obesity	Projected
France	FRATNP	Women	2041	std84	0.106647	0.111097	0.115979	obesity	Projected
France	FRATNP	Women	2042	std84	0.105874	0.110527	0.115661	obesity	Projected
France	FRATNP	Women	2043	std84	0.105058	0.109892	0.115265	obesity	Projected
France	FRATNP	Women	2044	std84	0.104178	0.109192	0.114804	obesity	Projected
France	FRATNP	Women	2045	std84	0.103253	0.108435	0.11426	obesity	Projected
France	FRATNP	Women	2046	std84	0.102278	0.10762	0.113654	obesity	Projected
France	FRATNP	Women	2047	std84	0.101278	0.10676	0.112994	obesity	Projected
France	FRATNP	Women	2048	std84	0.100226	0.105845	0.112271	obesity	Projected
France	FRATNP	Women	2049	std84	0.0991521	0.104888	0.111494	obesity	Projected
France	FRATNP	Women	2050	std84	0.0980503	0.103887	0.110657	obesity	Projected
France	FRATNP	Women	2051	std84	0.0969203	0.102851	0.109747	obesity	Projected
France	FRATNP	Women	2052	std84	0.0957615	0.101778	0.108824	obesity	Projected
France	FRATNP	Women	2053	std84	0.0946032	0.100684	0.107823	obesity	Projected
France	FRATNP	Women	2054	std84	0.0934199	0.0995545	0.106795	obesity	Projected
France	FRATNP	Women	2055	std84	0.0922205	0.0984079	0.105743	obesity	Projected
France	FRATNP	Women	2056	std84	0.0910467	0.0972472	0.104632	obesity	Projected
France	FRATNP	Women	2057	std84	0.0898509	0.0960697	0.103495	obesity	Projected
France	FRATNP	Women	2058	std84	0.088654	0.0948722	0.102355	obesity	Projected
France	FRATNP	Women	2059	std84	0.0874719	0.0936701	0.101164	obesity	Projected
France	FRATNP	Women	2060	std84	0.0863128	0.092472	0.0999499	obesity	Projected
France	FRATNP	Women	2061	std84	0.0851665	0.091266	0.0987266	obesity	Projected
France	FRATNP	Women	2062	std84	0.0840392	0.0900663	0.0975078	obesity	Projected
France	FRATNP	Women	2063	std84	0.0829214	0.0888687	0.0962624	obesity	Projected
France	FRATNP	Women	2064	std84	0.0818184	0.0876811	0.0950138	obesity	Projected
France	FRATNP	Women	2065	std84	0.0807421	0.0865074	0.0937661	obesity	Projected
France		Women	1990	std84		0.148631		lifestyle (combined)	Observed
France		Women	1991	std84		0.151614		lifestyle (combined)	Observed
France		Women	1992	std84		0.151208		lifestyle (combined)	Observed
France		Women	1993	std84		0.15477		lifestyle (combined)	Observed
France		Women	1994	std84		0.155035		lifestyle (combined)	Observed
France		Women	1995	std84		0.159791		lifestyle (combined)	Observed
France		Women	1996	std84		0.162551		lifestyle (combined)	Observed
France		Women	1997	std84		0.161612		lifestyle (combined)	Observed
France		Women	1998	std84		0.169968		lifestyle (combined)	Observed
France		Women	1999	std84		0.172242		lifestyle (combined)	Observed
France		Women	2000	std84		0.169632		lifestyle (combined)	Observed
France		Women	2001	std84		0.172337		lifestyle (combined)	Observed
France		Women	2002	std84		0.179629		lifestyle (combined)	Observed
France		Women	2003	std84		0.182243		lifestyle (combined)	Observed
France		Women	2004	std84		0.186461		lifestyle (combined)	Observed
France		Women	2005	std84		0.193525		lifestyle (combined)	Observed
France		Women	2006	std84		0.196312		lifestyle (combined)	Observed
France		Women	2007	std84		0.198043		lifestyle (combined)	Observed
France		Women	2008	std84		0.202273		lifestyle (combined)	Observed
France		Women	2009	std84		0.208018		lifestyle (combined)	Observed
France		Women	2010	std84		0.207834		lifestyle (combined)	Observed
France		Women	2011	std84		0.211489		lifestyle (combined)	Observed
France		Women	2012	std84		0.216564		lifestyle (combined)	Observed
France		Women	2013	std84		0.213222		lifestyle (combined)	Observed
France		Women	2014	std84		0.224431		lifestyle (combined)	Observed
France		Women	2015	std84		0.225165		lifestyle (combined)	Observed
France		Women	2015	std84		0.225165		lifestyle (combined)	Projected
France		Women	2016	std84		0.22497		lifestyle (combined)	Projected
France		Women	2017	std84		0.226345		lifestyle (combined)	Projected
France		Women	2018	std84		0.22614		lifestyle (combined)	Projected
France		Women	2019	std84		0.225261		lifestyle (combined)	Projected
France		Women	2020	std84		0.223932		lifestyle (combined)	Projected
France		Women	2021	std84		0.222571		lifestyle (combined)	Projected
France		Women	2022	std84		0.221346		lifestyle (combined)	Projected
France		Women	2023	std84		0.219327		lifestyle (combined)	Projected
France		Women	2024	std84		0.217431		lifestyle (combined)	Projected
France		Women	2025	std84		0.215191		lifestyle (combined)	Projected
France		Women	2026	std84		0.212598		lifestyle (combined)	Projected
France		Women	2027	std84		0.209771		lifestyle (combined)	Projected
France		Women	2028	std84		0.207011		lifestyle (combined)	Projected
France		Women	2029	std84		0.204284		lifestyle (combined)	Projected
France		Women	2030	std84		0.201398		lifestyle (combined)	Projected
France		Women	2031	std84		0.198563		lifestyle (combined)	Projected
France		Women	2032	std84		0.195959		lifestyle (combined)	Projected
France		Women	2033	std84		0.193685		lifestyle (combined)	Projected
France		Women	2034	std84		0.191327		lifestyle (combined)	Projected
France		Women	2035	std84		0.189374		lifestyle (combined)	Projected
France		Women	2036	std84		0.187612		lifestyle (combined)	Projected
France		Women	2037	std84		0.185946		lifestyle (combined)	Projected
France		Women	2038	std84		0.184451		lifestyle (combined)	Projected
France		Women	2039	std84		0.183096		lifestyle (combined)	Projected
France		Women	2040	std84		0.181823		lifestyle (combined)	Projected
France		Women	2041	std84		0.180611		lifestyle (combined)	Projected
France		Women	2042	std84		0.179484		lifestyle (combined)	Projected
France		Women	2043	std84		0.178358		lifestyle (combined)	Projected
France		Women	2044	std84		0.177247		lifestyle (combined)	Projected
France		Women	2045	std84		0.176129		lifestyle (combined)	Projected
France		Women	2046	std84		0.175004		lifestyle (combined)	Projected
France		Women	2047	std84		0.173863		lifestyle (combined)	Projected
France		Women	2048	std84		0.172685		lifestyle (combined)	Projected
France		Women	2049	std84		0.171482		lifestyle (combined)	Projected
France		Women	2050	std84		0.170251		lifestyle (combined)	Projected
France		Women	2051	std84		0.168991		lifestyle (combined)	Projected
France		Women	2052	std84		0.167708		lifestyle (combined)	Projected
France		Women	2053	std84		0.166411		lifestyle (combined)	Projected
France		Women	2054	std84		0.16508		lifestyle (combined)	Projected
France		Women	2055	std84		0.163737		lifestyle (combined)	Projected
France		Women	2056	std84		0.162377		lifestyle (combined)	Projected
France		Women	2057	std84		0.161009		lifestyle (combined)	Projected
France		Women	2058	std84		0.159626		lifestyle (combined)	Projected
France		Women	2059	std84		0.15824		lifestyle (combined)	Projected
France		Women	2060	std84		0.156869		lifestyle (combined)	Projected
France		Women	2061	std84		0.155486		lifestyle (combined)	Projected
France		Women	2062	std84		0.154115		lifestyle (combined)	Projected
France		Women	2063	std84		0.152748		lifestyle (combined)	Projected
France		Women	2064	std84		0.151408		lifestyle (combined)	Projected
France		Women	2065	std84		0.150072		lifestyle (combined)	Projected
Germany	DEUTNP	Women	1990	std84		0.0561488		smoking	Observed
Germany	DEUTNP	Women	1991	std84		0.0612685		smoking	Observed
Germany	DEUTNP	Women	1992	std84		0.0625008		smoking	Observed
Germany	DEUTNP	Women	1993	std84		0.0677432		smoking	Observed
Germany	DEUTNP	Women	1994	std84		0.0707159		smoking	Observed
Germany	DEUTNP	Women	1995	std84		0.0721369		smoking	Observed
Germany	DEUTNP	Women	1996	std84		0.0731523		smoking	Observed
Germany	DEUTNP	Women	1997	std84		0.0756058		smoking	Observed
Germany	DEUTNP	Women	1998	std84		0.0815548		smoking	Observed
Germany	DEUTNP	Women	1999	std84		0.082276		smoking	Observed
Germany	DEUTNP	Women	2000	std84		0.085221		smoking	Observed
Germany	DEUTNP	Women	2001	std84		0.0858603		smoking	Observed
Germany	DEUTNP	Women	2002	std84		0.0884327		smoking	Observed
Germany	DEUTNP	Women	2003	std84		0.090885		smoking	Observed
Germany	DEUTNP	Women	2004	std84		0.0941887		smoking	Observed
Germany	DEUTNP	Women	2005	std84		0.0994867		smoking	Observed
Germany	DEUTNP	Women	2006	std84		0.101788		smoking	Observed
Germany	DEUTNP	Women	2007	std84		0.106078		smoking	Observed
Germany	DEUTNP	Women	2008	std84		0.110242		smoking	Observed
Germany	DEUTNP	Women	2009	std84		0.113104		smoking	Observed
Germany	DEUTNP	Women	2010	std84		0.118094		smoking	Observed
Germany	DEUTNP	Women	2011	std84		0.124513		smoking	Observed
Germany	DEUTNP	Women	2012	std84		0.128354		smoking	Observed
Germany	DEUTNP	Women	2013	std84		0.132494		smoking	Observed
Germany	DEUTNP	Women	2014	std84		0.134587		smoking	Observed
Germany	DEUTNP	Women	2015	std84		0.138968		smoking	Observed
Germany	DEUTNP	Women	2016	std84	0.128366	0.133504	0.138712	smoking	Projected
Germany	DEUTNP	Women	2017	std84	0.126612	0.134837	0.143359	smoking	Projected
Germany	DEUTNP	Women	2018	std84	0.125419	0.136057	0.147264	smoking	Projected
Germany	DEUTNP	Women	2019	std84	0.124393	0.137077	0.15044	smoking	Projected
Germany	DEUTNP	Women	2020	std84	0.123552	0.137916	0.153262	smoking	Projected
Germany	DEUTNP	Women	2021	std84	0.122668	0.138528	0.155518	smoking	Projected
Germany	DEUTNP	Women	2022	std84	0.121688	0.139057	0.157607	smoking	Projected
Germany	DEUTNP	Women	2023	std84	0.120704	0.13929	0.159326	smoking	Projected
Germany	DEUTNP	Women	2024	std84	0.119573	0.139276	0.160494	smoking	Projected
Germany	DEUTNP	Women	2025	std84	0.118314	0.138927	0.161227	smoking	Projected
Germany	DEUTNP	Women	2026	std84	0.11676	0.13816	0.161633	smoking	Projected
Germany	DEUTNP	Women	2027	std84	0.11511	0.13721	0.161727	smoking	Projected
Germany	DEUTNP	Women	2028	std84	0.113407	0.136163	0.161593	smoking	Projected
Germany	DEUTNP	Women	2029	std84	0.111028	0.134368	0.160612	smoking	Projected
Germany	DEUTNP	Women	2030	std84	0.108591	0.132321	0.159224	smoking	Projected
Germany	DEUTNP	Women	2031	std84	0.106089	0.130161	0.157829	smoking	Projected
Germany	DEUTNP	Women	2032	std84	0.102921	0.12727	0.155153	smoking	Projected
Germany	DEUTNP	Women	2033	std84	0.0999281	0.124124	0.152487	smoking	Projected
Germany	DEUTNP	Women	2034	std84	0.0968991	0.120965	0.149629	smoking	Projected
Germany	DEUTNP	Women	2035	std84	0.0934163	0.117308	0.146114	smoking	Projected
Germany	DEUTNP	Women	2036	std84	0.0903327	0.113757	0.142628	smoking	Projected
Germany	DEUTNP	Women	2037	std84	0.0869399	0.109701	0.13837	smoking	Projected
Germany	DEUTNP	Women	2038	std84	0.0831408	0.10503	0.133267	smoking	Projected
Germany	DEUTNP	Women	2039	std84	0.0793922	0.100285	0.1279	smoking	Projected
Germany	DEUTNP	Women	2040	std84	0.0756572	0.0950383	0.121742	smoking	Projected
Germany	DEUTNP	Women	2041	std84	0.0719255	0.089733	0.114972	smoking	Projected
Germany	DEUTNP	Women	2042	std84	0.0683	0.0846044	0.108104	smoking	Projected
Germany	DEUTNP	Women	2043	std84	0.0651024	0.0796066	0.101464	smoking	Projected
Germany	DEUTNP	Women	2044	std84	0.0620693	0.0748631	0.0949442	smoking	Projected
Germany	DEUTNP	Women	2045	std84	0.0592865	0.0703595	0.0883474	smoking	Projected
Germany	DEUTNP	Women	2046	std84	0.0568928	0.0662453	0.0820483	smoking	Projected
Germany	DEUTNP	Women	2047	std84	0.0547636	0.0625388	0.0761506	smoking	Projected
Germany	DEUTNP	Women	2048	std84	0.0529188	0.0592544	0.0707507	smoking	Projected
Germany	DEUTNP	Women	2049	std84	0.051402	0.0564124	0.065844	smoking	Projected
Germany	DEUTNP	Women	2050	std84	0.0501156	0.0539265	0.0614529	smoking	Projected
Germany	DEUTNP	Women	2051	std84	0.0490747	0.0518849	0.0576565	smoking	Projected
Germany	DEUTNP	Women	2052	std84	0.0482634	0.0502165	0.0544381	smoking	Projected
Germany	DEUTNP	Women	2053	std84	0.0476302	0.0489171	0.0518839	smoking	Projected
Germany	DEUTNP	Women	2054	std84	0.0471852	0.0479694	0.0499637	smoking	Projected
Germany	DEUTNP	Women	2055	std84	0.0468887	0.0473353	0.0486928	smoking	Projected
Germany	DEUTNP	Women	2056	std84	0.0467203	0.0469764	0.0479969	smoking	Projected
Germany	DEUTNP	Women	2057	std84	0.046665	0.0468583	0.047738	smoking	Projected
Germany	DEUTNP	Women	2058	std84	0.0466352	0.046776	0.0475095	smoking	Projected
Germany	DEUTNP	Women	2059	std84	0.0466186	0.0467186	0.0473144	smoking	Projected
Germany	DEUTNP	Women	2060	std84	0.0466088	0.0466792	0.0471484	smoking	Projected
Germany	DEUTNP	Women	2061	std84	0.0466034	0.0466524	0.0470221	smoking	Projected
Germany	DEUTNP	Women	2062	std84	0.0466002	0.0466337	0.0469198	smoking	Projected
Germany	DEUTNP	Women	2063	std84	0.0465982	0.0466213	0.0468395	smoking	Projected
Germany	DEUTNP	Women	2064	std84	0.0465971	0.0466128	0.046779	smoking	Projected
Germany	DEUTNP	Women	2065	std84	0.0465964	0.0466071	0.0467309	smoking	Projected
Germany	DEUTNP	Women	1990	std84		0.0388537		alcohol	Observed
Germany	DEUTNP	Women	1991	std84		0.0394981		alcohol	Observed
Germany	DEUTNP	Women	1992	std84		0.0400034		alcohol	Observed
Germany	DEUTNP	Women	1993	std84		0.0398418		alcohol	Observed
Germany	DEUTNP	Women	1994	std84		0.0397273		alcohol	Observed
Germany	DEUTNP	Women	1995	std84		0.0398525		alcohol	Observed
Germany	DEUTNP	Women	1996	std84		0.0395837		alcohol	Observed
Germany	DEUTNP	Women	1997	std84		0.0394479		alcohol	Observed
Germany	DEUTNP	Women	1998	std84		0.0390515		alcohol	Observed
Germany	DEUTNP	Women	1999	std84		0.0390419		alcohol	Observed
Germany	DEUTNP	Women	2000	std84		0.0391452		alcohol	Observed
Germany	DEUTNP	Women	2001	std84		0.0390951		alcohol	Observed
Germany	DEUTNP	Women	2002	std84		0.0388901		alcohol	Observed
Germany	DEUTNP	Women	2003	std84		0.0388737		alcohol	Observed
Germany	DEUTNP	Women	2004	std84		0.0394318		alcohol	Observed
Germany	DEUTNP	Women	2005	std84		0.0395397		alcohol	Observed
Germany	DEUTNP	Women	2006	std84		0.0394674		alcohol	Observed
Germany	DEUTNP	Women	2007	std84		0.0389141		alcohol	Observed
Germany	DEUTNP	Women	2008	std84		0.0381427		alcohol	Observed
Germany	DEUTNP	Women	2009	std84		0.0376256		alcohol	Observed
Germany	DEUTNP	Women	2010	std84		0.0370847		alcohol	Observed
Germany	DEUTNP	Women	2011	std84		0.0367913		alcohol	Observed
Germany	DEUTNP	Women	2012	std84		0.0360374		alcohol	Observed
Germany	DEUTNP	Women	2013	std84		0.0357196		alcohol	Observed
Germany	DEUTNP	Women	2014	std84		0.0356843		alcohol	Observed
Germany	DEUTNP	Women	2015	std84		0.0351757		alcohol	Observed
Germany	DEUTNP	Women	2016	std84	0.034219	0.0348612	0.0355182	alcohol	Projected
Germany	DEUTNP	Women	2017	std84	0.0336037	0.0344866	0.0354072	alcohol	Projected
Germany	DEUTNP	Women	2018	std84	0.0330309	0.0341091	0.0352194	alcohol	Projected
Germany	DEUTNP	Women	2019	std84	0.0325075	0.0337276	0.0349851	alcohol	Projected
Germany	DEUTNP	Women	2020	std84	0.0320067	0.0333489	0.0347426	alcohol	Projected
Germany	DEUTNP	Women	2021	std84	0.0315253	0.0329689	0.0344845	alcohol	Projected
Germany	DEUTNP	Women	2022	std84	0.0310694	0.0325894	0.0342059	alcohol	Projected
Germany	DEUTNP	Women	2023	std84	0.0306143	0.0322161	0.0339141	alcohol	Projected
Germany	DEUTNP	Women	2024	std84	0.0301797	0.0318475	0.0336189	alcohol	Projected
Germany	DEUTNP	Women	2025	std84	0.0297691	0.0314845	0.0333314	alcohol	Projected
Germany	DEUTNP	Women	2026	std84	0.0293622	0.0311367	0.0330516	alcohol	Projected
Germany	DEUTNP	Women	2027	std84	0.028966	0.0307852	0.032782	alcohol	Projected
Germany	DEUTNP	Women	2028	std84	0.0285954	0.0304571	0.0324919	alcohol	Projected
Germany	DEUTNP	Women	2029	std84	0.0282536	0.0301425	0.0322272	alcohol	Projected
Germany	DEUTNP	Women	2030	std84	0.0279079	0.0298364	0.0319639	alcohol	Projected
Germany	DEUTNP	Women	2031	std84	0.0275751	0.0295375	0.0316908	alcohol	Projected
Germany	DEUTNP	Women	2032	std84	0.0272568	0.029258	0.0314475	alcohol	Projected
Germany	DEUTNP	Women	2033	std84	0.0269592	0.028983	0.0312121	alcohol	Projected
Germany	DEUTNP	Women	2034	std84	0.0266754	0.0287271	0.0309927	alcohol	Projected
Germany	DEUTNP	Women	2035	std84	0.026403	0.0284757	0.0307837	alcohol	Projected
Germany	DEUTNP	Women	2036	std84	0.0261497	0.0282311	0.0305705	alcohol	Projected
Germany	DEUTNP	Women	2037	std84	0.0258898	0.0280015	0.0303675	alcohol	Projected
Germany	DEUTNP	Women	2038	std84	0.0256575	0.0277681	0.0301837	alcohol	Projected
Germany	DEUTNP	Women	2039	std84	0.0254106	0.027554	0.0299897	alcohol	Projected
Germany	DEUTNP	Women	2040	std84	0.0251819	0.0273388	0.0297883	alcohol	Projected
Germany	DEUTNP	Women	2041	std84	0.0249651	0.027136	0.0296064	alcohol	Projected
Germany	DEUTNP	Women	2042	std84	0.0247586	0.026942	0.0294358	alcohol	Projected
Germany	DEUTNP	Women	2043	std84	0.024551	0.0267533	0.0292625	alcohol	Projected
Germany	DEUTNP	Women	2044	std84	0.0243653	0.0265749	0.0291043	alcohol	Projected
Germany	DEUTNP	Women	2045	std84	0.0241589	0.0263907	0.0289511	alcohol	Projected
Germany	DEUTNP	Women	2046	std84	0.0239762	0.0262175	0.0287872	alcohol	Projected
Germany	DEUTNP	Women	2047	std84	0.0237881	0.0260506	0.0286468	alcohol	Projected
Germany	DEUTNP	Women	2048	std84	0.0236221	0.0258876	0.0285126	alcohol	Projected
Germany	DEUTNP	Women	2049	std84	0.0234429	0.0257277	0.0283585	alcohol	Projected
Germany	DEUTNP	Women	2050	std84	0.023281	0.0255706	0.0282072	alcohol	Projected
Germany	DEUTNP	Women	2051	std84	0.0231218	0.0254171	0.0280715	alcohol	Projected
Germany	DEUTNP	Women	2052	std84	0.022979	0.025268	0.0279347	alcohol	Projected
Germany	DEUTNP	Women	2053	std84	0.0228189	0.0251225	0.0278107	alcohol	Projected
Germany	DEUTNP	Women	2054	std84	0.0226719	0.0249882	0.0276883	alcohol	Projected
Germany	DEUTNP	Women	2055	std84	0.0225152	0.0248448	0.0275487	alcohol	Projected
Germany	DEUTNP	Women	2056	std84	0.0223671	0.0247086	0.0274286	alcohol	Projected
Germany	DEUTNP	Women	2057	std84	0.0222317	0.0245762	0.0273128	alcohol	Projected
Germany	DEUTNP	Women	2058	std84	0.0220956	0.0244367	0.0271981	alcohol	Projected
Germany	DEUTNP	Women	2059	std84	0.0219522	0.0243103	0.0270767	alcohol	Projected
Germany	DEUTNP	Women	2060	std84	0.021827	0.0241761	0.0269493	alcohol	Projected
Germany	DEUTNP	Women	2061	std84	0.02169	0.0240489	0.0268291	alcohol	Projected
Germany	DEUTNP	Women	2062	std84	0.0215627	0.0239178	0.0267124	alcohol	Projected
Germany	DEUTNP	Women	2063	std84	0.0214193	0.0237913	0.0265989	alcohol	Projected
Germany	DEUTNP	Women	2064	std84	0.0213044	0.0236635	0.0264831	alcohol	Projected
Germany	DEUTNP	Women	2065	std84	0.0211698	0.0235353	0.026369	alcohol	Projected
Germany	DEUTNP	Women	1990	std84		0.0895745		obesity	Observed
Germany	DEUTNP	Women	1991	std84		0.0909657		obesity	Observed
Germany	DEUTNP	Women	1992	std84		0.0923701		obesity	Observed
Germany	DEUTNP	Women	1993	std84		0.0937895		obesity	Observed
Germany	DEUTNP	Women	1994	std84		0.0952181		obesity	Observed
Germany	DEUTNP	Women	1995	std84		0.0966492		obesity	Observed
Germany	DEUTNP	Women	1996	std84		0.0980654		obesity	Observed
Germany	DEUTNP	Women	1997	std84		0.0994618		obesity	Observed
Germany	DEUTNP	Women	1998	std84		0.100842		obesity	Observed
Germany	DEUTNP	Women	1999	std84		0.102201		obesity	Observed
Germany	DEUTNP	Women	2000	std84		0.103537		obesity	Observed
Germany	DEUTNP	Women	2001	std84		0.104865		obesity	Observed
Germany	DEUTNP	Women	2002	std84		0.10618		obesity	Observed
Germany	DEUTNP	Women	2003	std84		0.107481		obesity	Observed
Germany	DEUTNP	Women	2004	std84		0.108776		obesity	Observed
Germany	DEUTNP	Women	2005	std84		0.11006		obesity	Observed
Germany	DEUTNP	Women	2006	std84		0.111344		obesity	Observed
[truncated: 3,535 more rows]
