# Supplementary material for: Future life expectancy in Europe taking into account the impact of smoking, obesity, and alcohol
Source: eLife. 2021 Jul 6;10:e66590. doi: 10.7554/eLife.66590 (PMC8337079; doi:10.7554/eLife.66590)
Supplement: Figure 1—source data 1. [file elife-66590-fig1-data1.xlsx]

## Sheet: data
country	year	sex	age	method	median
Austria	1990	Men	std84	Observed	0.415282
Austria	1991	Men	std84	Observed	0.419219
Austria	1992	Men	std84	Observed	0.410858
Austria	1993	Men	std84	Observed	0.420018
Austria	1994	Men	std84	Observed	0.407929
Austria	1995	Men	std84	Observed	0.404842
Austria	1996	Men	std84	Observed	0.405522
Austria	1997	Men	std84	Observed	0.401134
Austria	1998	Men	std84	Observed	0.400978
Austria	1999	Men	std84	Observed	0.389639
Austria	2000	Men	std84	Observed	0.388389
Austria	2001	Men	std84	Observed	0.383559
Austria	2002	Men	std84	Observed	0.389312
Austria	2003	Men	std84	Observed	0.383304
Austria	2004	Men	std84	Observed	0.382984
Austria	2005	Men	std84	Observed	0.381391
Austria	2006	Men	std84	Observed	0.384117
Austria	2007	Men	std84	Observed	0.37193
Austria	2008	Men	std84	Observed	0.377888
Austria	2009	Men	std84	Observed	0.378018
Austria	2010	Men	std84	Observed	0.375014
Austria	2011	Men	std84	Observed	0.371607
Austria	2012	Men	std84	Observed	0.369338
Austria	2013	Men	std84	Observed	0.3731
Austria	2014	Men	std84	Observed	0.371273
Austria	2015	Men	std84	Projected	0.366482
Austria	2016	Men	std84	Projected	0.36457
Austria	2017	Men	std84	Projected	0.362764
Austria	2018	Men	std84	Projected	0.360749
Austria	2019	Men	std84	Projected	0.358685
Austria	2020	Men	std84	Projected	0.356593
Austria	2021	Men	std84	Projected	0.354443
Austria	2022	Men	std84	Projected	0.352294
Austria	2023	Men	std84	Projected	0.350205
Austria	2024	Men	std84	Projected	0.348089
Austria	2025	Men	std84	Projected	0.345985
Austria	2026	Men	std84	Projected	0.343829
Austria	2027	Men	std84	Projected	0.341731
Austria	2028	Men	std84	Projected	0.339545
Austria	2029	Men	std84	Projected	0.337431
Austria	2030	Men	std84	Projected	0.335386
Austria	2031	Men	std84	Projected	0.333341
Austria	2032	Men	std84	Projected	0.331327
Austria	2033	Men	std84	Projected	0.329269
Austria	2034	Men	std84	Projected	0.327235
Austria	2035	Men	std84	Projected	0.325152
Austria	2036	Men	std84	Projected	0.322918
Austria	2037	Men	std84	Projected	0.320902
Austria	2038	Men	std84	Projected	0.318764
Austria	2039	Men	std84	Projected	0.316745
Austria	2040	Men	std84	Projected	0.314639
Austria	2041	Men	std84	Projected	0.312536
Austria	2042	Men	std84	Projected	0.310353
Austria	2043	Men	std84	Projected	0.308185
Austria	2044	Men	std84	Projected	0.305907
Austria	2045	Men	std84	Projected	0.303658
Austria	2046	Men	std84	Projected	0.30134
Austria	2047	Men	std84	Projected	0.299006
Austria	2048	Men	std84	Projected	0.296679
Austria	2049	Men	std84	Projected	0.294312
Austria	2050	Men	std84	Projected	0.291831
Austria	2051	Men	std84	Projected	0.289389
Austria	2052	Men	std84	Projected	0.286974
Austria	2053	Men	std84	Projected	0.284505
Austria	2054	Men	std84	Projected	0.281907
Austria	2055	Men	std84	Projected	0.279372
Austria	2056	Men	std84	Projected	0.276723
Austria	2057	Men	std84	Projected	0.274104
Austria	2058	Men	std84	Projected	0.271452
Austria	2059	Men	std84	Projected	0.268771
Austria	2060	Men	std84	Projected	0.266083
Austria	2061	Men	std84	Projected	0.263359
Austria	2062	Men	std84	Projected	0.260614
Austria	2063	Men	std84	Projected	0.257881
Austria	2064	Men	std84	Projected	0.255165
Austria	2065	Men	std84	Projected	0.252364
Belgium	1990	Men	std84	Observed	0.471924
Belgium	1991	Men	std84	Observed	0.47059
Belgium	1992	Men	std84	Observed	0.471621
Belgium	1993	Men	std84	Observed	0.474291
Belgium	1994	Men	std84	Observed	0.467497
Belgium	1995	Men	std84	Observed	0.472151
Belgium	1996	Men	std84	Observed	0.45981
Belgium	1997	Men	std84	Observed	0.463564
Belgium	1998	Men	std84	Observed	0.447117
Belgium	1999	Men	std84	Observed	0.436467
Belgium	2000	Men	std84	Observed	0.433888
Belgium	2001	Men	std84	Observed	0.439895
Belgium	2002	Men	std84	Observed	0.434841
Belgium	2003	Men	std84	Observed	0.430654
Belgium	2004	Men	std84	Observed	0.425771
Belgium	2005	Men	std84	Observed	0.434433
Belgium	2006	Men	std84	Observed	0.432498
Belgium	2007	Men	std84	Observed	0.426319
Belgium	2008	Men	std84	Observed	0.429794
Belgium	2009	Men	std84	Observed	0.424744
Belgium	2010	Men	std84	Observed	0.427929
Belgium	2011	Men	std84	Observed	0.418612
Belgium	2012	Men	std84	Observed	0.409716
Belgium	2013	Men	std84	Observed	0.403912
Belgium	2014	Men	std84	Observed	0.404833
Belgium	2015	Men	std84	Observed	0.394845
Belgium	2015	Men	std84	Projected	0.394845
Belgium	2016	Men	std84	Projected	0.375491
Belgium	2017	Men	std84	Projected	0.371678
Belgium	2018	Men	std84	Projected	0.364818
Belgium	2019	Men	std84	Projected	0.35929
Belgium	2020	Men	std84	Projected	0.352919
Belgium	2021	Men	std84	Projected	0.346862
Belgium	2022	Men	std84	Projected	0.340432
Belgium	2023	Men	std84	Projected	0.334354
Belgium	2024	Men	std84	Projected	0.328017
Belgium	2025	Men	std84	Projected	0.32194
Belgium	2026	Men	std84	Projected	0.315989
Belgium	2027	Men	std84	Projected	0.310257
Belgium	2028	Men	std84	Projected	0.304498
Belgium	2029	Men	std84	Projected	0.299214
Belgium	2030	Men	std84	Projected	0.293942
Belgium	2031	Men	std84	Projected	0.289074
Belgium	2032	Men	std84	Projected	0.284204
Belgium	2033	Men	std84	Projected	0.279849
Belgium	2034	Men	std84	Projected	0.275466
Belgium	2035	Men	std84	Projected	0.271569
Belgium	2036	Men	std84	Projected	0.267784
Belgium	2037	Men	std84	Projected	0.264113
Belgium	2038	Men	std84	Projected	0.260813
Belgium	2039	Men	std84	Projected	0.257645
Belgium	2040	Men	std84	Projected	0.254588
Belgium	2041	Men	std84	Projected	0.251717
Belgium	2042	Men	std84	Projected	0.248918
Belgium	2043	Men	std84	Projected	0.246244
Belgium	2044	Men	std84	Projected	0.243577
Belgium	2045	Men	std84	Projected	0.241041
Belgium	2046	Men	std84	Projected	0.238523
Belgium	2047	Men	std84	Projected	0.236003
Belgium	2048	Men	std84	Projected	0.233493
Belgium	2049	Men	std84	Projected	0.231039
Belgium	2050	Men	std84	Projected	0.228613
Belgium	2051	Men	std84	Projected	0.226158
Belgium	2052	Men	std84	Projected	0.223752
Belgium	2053	Men	std84	Projected	0.221341
Belgium	2054	Men	std84	Projected	0.218964
Belgium	2055	Men	std84	Projected	0.216529
Belgium	2056	Men	std84	Projected	0.214095
Belgium	2057	Men	std84	Projected	0.21169
Belgium	2058	Men	std84	Projected	0.209241
Belgium	2059	Men	std84	Projected	0.206831
Belgium	2060	Men	std84	Projected	0.20446
Belgium	2061	Men	std84	Projected	0.202053
Belgium	2062	Men	std84	Projected	0.199635
Belgium	2063	Men	std84	Projected	0.197228
Belgium	2064	Men	std84	Projected	0.194863
Belgium	2065	Men	std84	Projected	0.192496
Czech Republic	1990	Men	std84	Observed	0.512662
Czech Republic	1991	Men	std84	Observed	0.512623
Czech Republic	1992	Men	std84	Observed	0.511401
Czech Republic	1993	Men	std84	Observed	0.513277
Czech Republic	1994	Men	std84	Observed	0.500688
Czech Republic	1995	Men	std84	Observed	0.512497
Czech Republic	1996	Men	std84	Observed	0.504214
Czech Republic	1997	Men	std84	Observed	0.508045
Czech Republic	1998	Men	std84	Observed	0.501786
Czech Republic	1999	Men	std84	Observed	0.504464
Czech Republic	2000	Men	std84	Observed	0.508802
Czech Republic	2001	Men	std84	Observed	0.501039
Czech Republic	2002	Men	std84	Observed	0.4984
Czech Republic	2003	Men	std84	Observed	0.496284
Czech Republic	2004	Men	std84	Observed	0.496365
Czech Republic	2005	Men	std84	Observed	0.486311
Czech Republic	2006	Men	std84	Observed	0.482026
Czech Republic	2007	Men	std84	Observed	0.474581
Czech Republic	2008	Men	std84	Observed	0.464443
Czech Republic	2009	Men	std84	Observed	0.463236
Czech Republic	2010	Men	std84	Observed	0.465098
Czech Republic	2011	Men	std84	Observed	0.456793
Czech Republic	2012	Men	std84	Observed	0.448047
Czech Republic	2013	Men	std84	Observed	0.441569
Czech Republic	2014	Men	std84	Observed	0.431712
Czech Republic	2015	Men	std84	Observed	0.424714
Czech Republic	2015	Men	std84	Projected	0.424714
Czech Republic	2016	Men	std84	Observed	0.422865
Czech Republic	2016	Men	std84	Projected	0.422865
Czech Republic	2017	Men	std84	Projected	0.392834
Czech Republic	2018	Men	std84	Projected	0.383863
Czech Republic	2019	Men	std84	Projected	0.374691
Czech Republic	2020	Men	std84	Projected	0.36632
Czech Republic	2021	Men	std84	Projected	0.358354
Czech Republic	2022	Men	std84	Projected	0.350999
Czech Republic	2023	Men	std84	Projected	0.344127
Czech Republic	2024	Men	std84	Projected	0.337868
Czech Republic	2025	Men	std84	Projected	0.332252
Czech Republic	2026	Men	std84	Projected	0.326959
Czech Republic	2027	Men	std84	Projected	0.322318
Czech Republic	2028	Men	std84	Projected	0.317961
Czech Republic	2029	Men	std84	Projected	0.314016
Czech Republic	2030	Men	std84	Projected	0.310429
Czech Republic	2031	Men	std84	Projected	0.306862
Czech Republic	2032	Men	std84	Projected	0.303733
Czech Republic	2033	Men	std84	Projected	0.300557
Czech Republic	2034	Men	std84	Projected	0.297588
Czech Republic	2035	Men	std84	Projected	0.294779
Czech Republic	2036	Men	std84	Projected	0.292032
Czech Republic	2037	Men	std84	Projected	0.289419
Czech Republic	2038	Men	std84	Projected	0.286809
Czech Republic	2039	Men	std84	Projected	0.284329
Czech Republic	2040	Men	std84	Projected	0.281954
Czech Republic	2041	Men	std84	Projected	0.279714
Czech Republic	2042	Men	std84	Projected	0.27759
Czech Republic	2043	Men	std84	Projected	0.275572
Czech Republic	2044	Men	std84	Projected	0.273692
Czech Republic	2045	Men	std84	Projected	0.271964
Czech Republic	2046	Men	std84	Projected	0.270325
Czech Republic	2047	Men	std84	Projected	0.268821
Czech Republic	2048	Men	std84	Projected	0.267397
Czech Republic	2049	Men	std84	Projected	0.266066
Czech Republic	2050	Men	std84	Projected	0.264847
Czech Republic	2051	Men	std84	Projected	0.263686
Czech Republic	2052	Men	std84	Projected	0.262568
Czech Republic	2053	Men	std84	Projected	0.261517
Czech Republic	2054	Men	std84	Projected	0.260492
Czech Republic	2055	Men	std84	Projected	0.259504
Czech Republic	2056	Men	std84	Projected	0.258527
Czech Republic	2057	Men	std84	Projected	0.257567
Czech Republic	2058	Men	std84	Projected	0.256605
Czech Republic	2059	Men	std84	Projected	0.25564
Czech Republic	2060	Men	std84	Projected	0.254659
Czech Republic	2061	Men	std84	Projected	0.253658
Czech Republic	2062	Men	std84	Projected	0.252633
Czech Republic	2063	Men	std84	Projected	0.25159
Czech Republic	2064	Men	std84	Projected	0.250514
Czech Republic	2065	Men	std84	Projected	0.249395
Denmark	1990	Men	std84	Observed	0.418722
Denmark	1991	Men	std84	Observed	0.40632
Denmark	1992	Men	std84	Observed	0.410771
Denmark	1993	Men	std84	Observed	0.424044
Denmark	1994	Men	std84	Observed	0.415817
Denmark	1995	Men	std84	Observed	0.417251
Denmark	1996	Men	std84	Observed	0.418824
Denmark	1997	Men	std84	Observed	0.414724
Denmark	1998	Men	std84	Observed	0.402688
Denmark	1999	Men	std84	Observed	0.415248
Denmark	2000	Men	std84	Observed	0.418343
Denmark	2001	Men	std84	Observed	0.409418
Denmark	2002	Men	std84	Observed	0.403631
Denmark	2003	Men	std84	Observed	0.412704
Denmark	2004	Men	std84	Observed	0.412102
Denmark	2005	Men	std84	Observed	0.408199
Denmark	2006	Men	std84	Observed	0.417458
Denmark	2007	Men	std84	Observed	0.393692
Denmark	2008	Men	std84	Observed	0.404027
Denmark	2009	Men	std84	Observed	0.387019
Denmark	2010	Men	std84	Observed	0.383754
Denmark	2011	Men	std84	Observed	0.374488
Denmark	2012	Men	std84	Observed	0.38275
Denmark	2013	Men	std84	Observed	0.382667
Denmark	2014	Men	std84	Observed	0.380273
Denmark	2015	Men	std84	Observed	0.364043
Denmark	2015	Men	std84	Projected	0.364043
Denmark	2016	Men	std84	Projected	0.342356
Denmark	2017	Men	std84	Projected	0.338596
Denmark	2018	Men	std84	Projected	0.335379
Denmark	2019	Men	std84	Projected	0.331535
Denmark	2020	Men	std84	Projected	0.327381
Denmark	2021	Men	std84	Projected	0.322976
Denmark	2022	Men	std84	Projected	0.318729
Denmark	2023	Men	std84	Projected	0.314498
Denmark	2024	Men	std84	Projected	0.310099
Denmark	2025	Men	std84	Projected	0.305832
Denmark	2026	Men	std84	Projected	0.301901
Denmark	2027	Men	std84	Projected	0.298046
Denmark	2028	Men	std84	Projected	0.293999
Denmark	2029	Men	std84	Projected	0.290168
Denmark	2030	Men	std84	Projected	0.2863
Denmark	2031	Men	std84	Projected	0.282592
Denmark	2032	Men	std84	Projected	0.279191
Denmark	2033	Men	std84	Projected	0.275848
Denmark	2034	Men	std84	Projected	0.272947
Denmark	2035	Men	std84	Projected	0.270094
Denmark	2036	Men	std84	Projected	0.267581
Denmark	2037	Men	std84	Projected	0.264964
Denmark	2038	Men	std84	Projected	0.262466
Denmark	2039	Men	std84	Projected	0.259966
Denmark	2040	Men	std84	Projected	0.25746
Denmark	2041	Men	std84	Projected	0.254908
Denmark	2042	Men	std84	Projected	0.252734
Denmark	2043	Men	std84	Projected	0.25059
Denmark	2044	Men	std84	Projected	0.248382
Denmark	2045	Men	std84	Projected	0.246238
Denmark	2046	Men	std84	Projected	0.24409
Denmark	2047	Men	std84	Projected	0.24203
Denmark	2048	Men	std84	Projected	0.239842
Denmark	2049	Men	std84	Projected	0.23773
Denmark	2050	Men	std84	Projected	0.235533
Denmark	2051	Men	std84	Projected	0.233263
Denmark	2052	Men	std84	Projected	0.231168
Denmark	2053	Men	std84	Projected	0.228971
Denmark	2054	Men	std84	Projected	0.226841
Denmark	2055	Men	std84	Projected	0.224548
Denmark	2056	Men	std84	Projected	0.222249
Denmark	2057	Men	std84	Projected	0.219918
Denmark	2058	Men	std84	Projected	0.217571
Denmark	2059	Men	std84	Projected	0.214966
Denmark	2060	Men	std84	Projected	0.21253
Denmark	2061	Men	std84	Projected	0.210012
Denmark	2062	Men	std84	Projected	0.207489
Denmark	2063	Men	std84	Projected	0.204993
Denmark	2064	Men	std84	Projected	0.202425
Denmark	2065	Men	std84	Projected	0.19974
Finland	1990	Men	std84	Observed	0.419218
Finland	1991	Men	std84	Observed	0.39598
Finland	1992	Men	std84	Observed	0.412944
Finland	1993	Men	std84	Observed	0.404949
Finland	1994	Men	std84	Observed	0.391451
Finland	1995	Men	std84	Observed	0.394389
Finland	1996	Men	std84	Observed	0.393578
Finland	1997	Men	std84	Observed	0.382082
Finland	1998	Men	std84	Observed	0.38991
Finland	1999	Men	std84	Observed	0.377621
Finland	2000	Men	std84	Observed	0.37431
Finland	2001	Men	std84	Observed	0.375043
Finland	2002	Men	std84	Observed	0.371537
Finland	2003	Men	std84	Observed	0.377752
Finland	2004	Men	std84	Observed	0.373541
Finland	2005	Men	std84	Observed	0.377226
Finland	2006	Men	std84	Observed	0.373917
Finland	2007	Men	std84	Observed	0.372829
Finland	2008	Men	std84	Observed	0.368829
Finland	2009	Men	std84	Observed	0.369245
Finland	2010	Men	std84	Observed	0.377823
Finland	2011	Men	std84	Observed	0.366936
Finland	2012	Men	std84	Observed	0.36474
Finland	2013	Men	std84	Observed	0.367822
Finland	2014	Men	std84	Observed	0.350598
Finland	2015	Men	std84	Observed	0.354662
Finland	2015	Men	std84	Projected	0.354662
Finland	2016	Men	std84	Projected	0.346155
Finland	2017	Men	std84	Projected	0.341256
Finland	2018	Men	std84	Projected	0.338609
Finland	2019	Men	std84	Projected	0.336111
Finland	2020	Men	std84	Projected	0.333634
Finland	2021	Men	std84	Projected	0.331129
Finland	2022	Men	std84	Projected	0.328842
Finland	2023	Men	std84	Projected	0.326455
Finland	2024	Men	std84	Projected	0.324067
Finland	2025	Men	std84	Projected	0.32168
Finland	2026	Men	std84	Projected	0.318929
Finland	2027	Men	std84	Projected	0.316344
Finland	2028	Men	std84	Projected	0.313604
Finland	2029	Men	std84	Projected	0.311038
Finland	2030	Men	std84	Projected	0.308138
Finland	2031	Men	std84	Projected	0.305317
Finland	2032	Men	std84	Projected	0.302204
Finland	2033	Men	std84	Projected	0.298973
Finland	2034	Men	std84	Projected	0.295724
Finland	2035	Men	std84	Projected	0.292513
Finland	2036	Men	std84	Projected	0.289338
Finland	2037	Men	std84	Projected	0.28635
Finland	2038	Men	std84	Projected	0.283316
Finland	2039	Men	std84	Projected	0.28031
Finland	2040	Men	std84	Projected	0.27727
Finland	2041	Men	std84	Projected	0.274306
Finland	2042	Men	std84	Projected	0.271252
Finland	2043	Men	std84	Projected	0.2684
Finland	2044	Men	std84	Projected	0.265526
Finland	2045	Men	std84	Projected	0.262679
Finland	2046	Men	std84	Projected	0.259813
Finland	2047	Men	std84	Projected	0.257052
Finland	2048	Men	std84	Projected	0.254193
Finland	2049	Men	std84	Projected	0.251386
Finland	2050	Men	std84	Projected	0.248599
Finland	2051	Men	std84	Projected	0.245848
Finland	2052	Men	std84	Projected	0.243053
Finland	2053	Men	std84	Projected	0.240291
Finland	2054	Men	std84	Projected	0.237511
Finland	2055	Men	std84	Projected	0.234763
Finland	2056	Men	std84	Projected	0.232014
Finland	2057	Men	std84	Projected	0.22935
Finland	2058	Men	std84	Projected	0.226697
Finland	2059	Men	std84	Projected	0.224028
Finland	2060	Men	std84	Projected	0.221346
Finland	2061	Men	std84	Projected	0.218628
Finland	2062	Men	std84	Projected	0.21598
Finland	2063	Men	std84	Projected	0.213314
Finland	2064	Men	std84	Projected	0.210603
Finland	2065	Men	std84	Projected	0.2079
France	1990	Men	std84	Observed	0.448602
France	1991	Men	std84	Observed	0.448918
France	1992	Men	std84	Observed	0.447595
France	1993	Men	std84	Observed	0.448498
France	1994	Men	std84	Observed	0.444237
France	1995	Men	std84	Observed	0.444171
France	1996	Men	std84	Observed	0.441743
France	1997	Men	std84	Observed	0.4408
France	1998	Men	std84	Observed	0.442556
France	1999	Men	std84	Observed	0.441209
France	2000	Men	std84	Observed	0.436543
France	2001	Men	std84	Observed	0.435944
France	2002	Men	std84	Observed	0.434611
France	2003	Men	std84	Observed	0.432388
France	2004	Men	std84	Observed	0.433006
France	2005	Men	std84	Observed	0.434042
France	2006	Men	std84	Observed	0.433374
France	2007	Men	std84	Observed	0.43109
France	2008	Men	std84	Observed	0.427624
France	2009	Men	std84	Observed	0.427819
France	2010	Men	std84	Observed	0.424466
France	2011	Men	std84	Observed	0.424495
France	2012	Men	std84	Observed	0.418715
France	2013	Men	std84	Observed	0.415346
France	2014	Men	std84	Observed	0.415518
France	2015	Men	std84	Observed	0.413868
France	2015	Men	std84	Projected	0.413868
France	2016	Men	std84	Projected	0.407554
France	2017	Men	std84	Projected	0.406003
France	2018	Men	std84	Projected	0.404151
France	2019	Men	std84	Projected	0.402121
France	2020	Men	std84	Projected	0.399966
France	2021	Men	std84	Projected	0.397623
France	2022	Men	std84	Projected	0.395172
France	2023	Men	std84	Projected	0.392634
France	2024	Men	std84	Projected	0.389898
France	2025	Men	std84	Projected	0.387016
France	2026	Men	std84	Projected	0.384024
France	2027	Men	std84	Projected	0.381025
France	2028	Men	std84	Projected	0.377748
France	2029	Men	std84	Projected	0.374401
France	2030	Men	std84	Projected	0.370989
France	2031	Men	std84	Projected	0.367489
France	2032	Men	std84	Projected	0.363777
France	2033	Men	std84	Projected	0.360131
France	2034	Men	std84	Projected	0.35628
France	2035	Men	std84	Projected	0.352488
France	2036	Men	std84	Projected	0.348502
France	2037	Men	std84	Projected	0.344447
France	2038	Men	std84	Projected	0.34044
France	2039	Men	std84	Projected	0.336493
France	2040	Men	std84	Projected	0.332498
France	2041	Men	std84	Projected	0.328459
France	2042	Men	std84	Projected	0.324457
France	2043	Men	std84	Projected	0.320473
France	2044	Men	std84	Projected	0.316472
France	2045	Men	std84	Projected	0.312558
France	2046	Men	std84	Projected	0.308637
France	2047	Men	std84	Projected	0.304679
France	2048	Men	std84	Projected	0.300774
France	2049	Men	std84	Projected	0.296883
France	2050	Men	std84	Projected	0.293072
France	2051	Men	std84	Projected	0.289222
France	2052	Men	std84	Projected	0.285422
France	2053	Men	std84	Projected	0.281638
France	2054	Men	std84	Projected	0.277902
France	2055	Men	std84	Projected	0.27416
France	2056	Men	std84	Projected	0.270439
France	2057	Men	std84	Projected	0.266737
France	2058	Men	std84	Projected	0.263065
France	2059	Men	std84	Projected	0.259404
France	2060	Men	std84	Projected	0.25584
France	2061	Men	std84	Projected	0.252285
France	2062	Men	std84	Projected	0.248774
France	2063	Men	std84	Projected	0.245291
France	2064	Men	std84	Projected	0.241889
France	2065	Men	std84	Projected	0.238521
Germany	1990	Men	std84	Observed	0.422133
Germany	1991	Men	std84	Observed	0.425013
Germany	1992	Men	std84	Observed	0.425553
Germany	1993	Men	std84	Observed	0.427038
Germany	1994	Men	std84	Observed	0.422814
Germany	1995	Men	std84	Observed	0.424719
Germany	1996	Men	std84	Observed	0.418684
Germany	1997	Men	std84	Observed	0.417428
Germany	1998	Men	std84	Observed	0.415647
Germany	1999	Men	std84	Observed	0.409894
Germany	2000	Men	std84	Observed	0.412332
Germany	2001	Men	std84	Observed	0.40613
Germany	2002	Men	std84	Observed	0.404136
Germany	2003	Men	std84	Observed	0.401255
Germany	2004	Men	std84	Observed	0.399544
Germany	2005	Men	std84	Observed	0.397823
Germany	2006	Men	std84	Observed	0.394223
Germany	2007	Men	std84	Observed	0.391659
Germany	2008	Men	std84	Observed	0.391632
Germany	2009	Men	std84	Observed	0.386556
Germany	2010	Men	std84	Observed	0.383072
Germany	2011	Men	std84	Observed	0.385024
Germany	2012	Men	std84	Observed	0.385303
Germany	2013	Men	std84	Observed	0.383402
Germany	2014	Men	std84	Observed	0.381862
Germany	2015	Men	std84	Observed	0.380339
Germany	2015	Men	std84	Projected	0.380339
Germany	2016	Men	std84	Projected	0.372596
Germany	2017	Men	std84	Projected	0.370806
Germany	2018	Men	std84	Projected	0.368693
Germany	2019	Men	std84	Projected	0.366546
Germany	2020	Men	std84	Projected	0.36438
Germany	2021	Men	std84	Projected	0.362234
Germany	2022	Men	std84	Projected	0.360096
Germany	2023	Men	std84	Projected	0.357945
Germany	2024	Men	std84	Projected	0.355809
Germany	2025	Men	std84	Projected	0.353671
Germany	2026	Men	std84	Projected	0.351554
Germany	2027	Men	std84	Projected	0.349469
Germany	2028	Men	std84	Projected	0.347385
Germany	2029	Men	std84	Projected	0.345383
Germany	2030	Men	std84	Projected	0.343328
Germany	2031	Men	std84	Projected	0.341343
Germany	2032	Men	std84	Projected	0.339326
Germany	2033	Men	std84	Projected	0.337373
Germany	2034	Men	std84	Projected	0.335395
Germany	2035	Men	std84	Projected	0.333456
Germany	2036	Men	std84	Projected	0.331487
Germany	2037	Men	std84	Projected	0.329503
Germany	2038	Men	std84	Projected	0.327567
Germany	2039	Men	std84	Projected	0.325611
Germany	2040	Men	std84	Projected	0.323619
Germany	2041	Men	std84	Projected	0.321653
Germany	2042	Men	std84	Projected	0.319666
Germany	2043	Men	std84	Projected	0.317684
Germany	2044	Men	std84	Projected	0.315689
Germany	2045	Men	std84	Projected	0.313685
Germany	2046	Men	std84	Projected	0.311644
Germany	2047	Men	std84	Projected	0.309601
Germany	2048	Men	std84	Projected	0.307531
Germany	2049	Men	std84	Projected	0.305448
Germany	2050	Men	std84	Projected	0.303347
Germany	2051	Men	std84	Projected	0.301225
Germany	2052	Men	std84	Projected	0.299057
Germany	2053	Men	std84	Projected	0.296907
Germany	2054	Men	std84	Projected	0.294734
Germany	2055	Men	std84	Projected	0.292517
Germany	2056	Men	std84	Projected	0.290286
Germany	2057	Men	std84	Projected	0.288009
Germany	2058	Men	std84	Projected	0.285721
Germany	2059	Men	std84	Projected	0.283383
Germany	2060	Men	std84	Projected	0.281028
Germany	2061	Men	std84	Projected	0.278618
Germany	2062	Men	std84	Projected	0.276202
Germany	2063	Men	std84	Projected	0.273756
Germany	2064	Men	std84	Projected	0.271304
Germany	2065	Men	std84	Projected	0.268824
Greece	1990	Men	std84	Observed	0.391984
Greece	1991	Men	std84	Observed	0.394521
Greece	1992	Men	std84	Observed	0.389063
Greece	1993	Men	std84	Observed	0.396878
Greece	1994	Men	std84	Observed	0.396397
Greece	1995	Men	std84	Observed	0.390545
Greece	1996	Men	std84	Observed	0.392978
Greece	1997	Men	std84	Observed	0.388324
Greece	1998	Men	std84	Observed	0.388625
Greece	1999	Men	std84	Observed	0.38916
Greece	2000	Men	std84	Observed	0.387904
Greece	2001	Men	std84	Observed	0.388458
Greece	2002	Men	std84	Observed	0.38412
Greece	2003	Men	std84	Observed	0.385472
Greece	2004	Men	std84	Observed	0.390892
Greece	2005	Men	std84	Observed	0.390478
Greece	2006	Men	std84	Observed	0.389895
Greece	2007	Men	std84	Observed	0.391229
Greece	2008	Men	std84	Observed	0.395979
Greece	2009	Men	std84	Observed	0.395352
Greece	2010	Men	std84	Observed	0.391997
Greece	2011	Men	std84	Observed	0.396082
Greece	2012	Men	std84	Observed	0.398694
Greece	2013	Men	std84	Observed	0.405794
Greece	2015	Men	std84	Projected	0.388053
Greece	2016	Men	std84	Projected	0.388199
Greece	2017	Men	std84	Projected	0.38672
Greece	2018	Men	std84	Projected	0.38713
Greece	2019	Men	std84	Projected	0.386546
Greece	2020	Men	std84	Projected	0.385319
Greece	2021	Men	std84	Projected	0.384737
Greece	2022	Men	std84	Projected	0.383579
Greece	2023	Men	std84	Projected	0.382224
Greece	2024	Men	std84	Projected	0.380904
Greece	2025	Men	std84	Projected	0.379157
Greece	2026	Men	std84	Projected	0.377215
Greece	2027	Men	std84	Projected	0.375265
Greece	2028	Men	std84	Projected	0.372871
Greece	2029	Men	std84	Projected	0.370238
Greece	2030	Men	std84	Projected	0.367599
Greece	2031	Men	std84	Projected	0.3646
Greece	2032	Men	std84	Projected	0.361461
Greece	2033	Men	std84	Projected	0.35811
Greece	2034	Men	std84	Projected	0.354496
Greece	2035	Men	std84	Projected	0.350927
Greece	2036	Men	std84	Projected	0.347132
Greece	2037	Men	std84	Projected	0.343282
Greece	2038	Men	std84	Projected	0.339369
Greece	2039	Men	std84	Projected	0.335455
Greece	2040	Men	std84	Projected	0.331463
Greece	2041	Men	std84	Projected	0.32778
Greece	2042	Men	std84	Projected	0.323932
Greece	2043	Men	std84	Projected	0.32022
Greece	2044	Men	std84	Projected	0.316565
Greece	2045	Men	std84	Projected	0.313075
Greece	2046	Men	std84	Projected	0.309533
Greece	2047	Men	std84	Projected	0.306148
Greece	2048	Men	std84	Projected	0.302838
Greece	2049	Men	std84	Projected	0.29957
Greece	2050	Men	std84	Projected	0.296395
Greece	2051	Men	std84	Projected	0.293237
Greece	2052	Men	std84	Projected	0.29017
Greece	2053	Men	std84	Projected	0.287083
Greece	2054	Men	std84	Projected	0.284108
Greece	2055	Men	std84	Projected	0.281098
Greece	2056	Men	std84	Projected	0.278136
Greece	2057	Men	std84	Projected	0.2752
Greece	2058	Men	std84	Projected	0.272274
Greece	2059	Men	std84	Projected	0.269326
Greece	2060	Men	std84	Projected	0.266432
Greece	2061	Men	std84	Projected	0.263527
Greece	2062	Men	std84	Projected	0.260635
Greece	2063	Men	std84	Projected	0.257776
Greece	2064	Men	std84	Projected	0.254917
Greece	2065	Men	std84	Projected	0.252076
Hungary	1990	Men	std84	Observed	0.555892
Hungary	1991	Men	std84	Observed	0.55857
Hungary	1992	Men	std84	Observed	0.56474
Hungary	1993	Men	std84	Observed	0.563903
Hungary	1994	Men	std84	Observed	0.570858
Hungary	1995	Men	std84	Observed	0.568785
Hungary	1996	Men	std84	Observed	0.573974
Hungary	1997	Men	std84	Observed	0.574225
Hungary	1998	Men	std84	Observed	0.574798
Hungary	1999	Men	std84	Observed	0.57504
Hungary	2000	Men	std84	Observed	0.574279
Hungary	2001	Men	std84	Observed	0.571381
Hungary	2002	Men	std84	Observed	0.568529
Hungary	2003	Men	std84	Observed	0.57362
Hungary	2004	Men	std84	Observed	0.574835
Hungary	2005	Men	std84	Observed	0.562716
Hungary	2006	Men	std84	Observed	0.565666
Hungary	2007	Men	std84	Observed	0.566944
Hungary	2008	Men	std84	Observed	0.566038
Hungary	2009	Men	std84	Observed	0.568016
Hungary	2010	Men	std84	Observed	0.571412
Hungary	2011	Men	std84	Observed	0.567077
Hungary	2012	Men	std84	Observed	0.573364
Hungary	2013	Men	std84	Observed	0.564968
Hungary	2014	Men	std84	Observed	0.566791
Hungary	2015	Men	std84	Projected	0.562201
Hungary	2016	Men	std84	Projected	0.560188
Hungary	2017	Men	std84	Projected	0.558938
Hungary	2018	Men	std84	Projected	0.556628
Hungary	2019	Men	std84	Projected	0.554438
Hungary	2020	Men	std84	Projected	0.55173
Hungary	2021	Men	std84	Projected	0.54867
Hungary	2022	Men	std84	Projected	0.54497
Hungary	2023	Men	std84	Projected	0.540884
Hungary	2024	Men	std84	Projected	0.535969
Hungary	2025	Men	std84	Projected	0.530658
Hungary	2026	Men	std84	Projected	0.52444
Hungary	2027	Men	std84	Projected	0.517317
Hungary	2028	Men	std84	Projected	0.509396
Hungary	2029	Men	std84	Projected	0.500835
Hungary	2030	Men	std84	Projected	0.491651
Hungary	2031	Men	std84	Projected	0.481951
Hungary	2032	Men	std84	Projected	0.471981
Hungary	2033	Men	std84	Projected	0.46162
Hungary	2034	Men	std84	Projected	0.450755
Hungary	2035	Men	std84	Projected	0.439959
Hungary	2036	Men	std84	Projected	0.4296
Hungary	2037	Men	std84	Projected	0.419564
Hungary	2038	Men	std84	Projected	0.409762
Hungary	2039	Men	std84	Projected	0.400316
Hungary	2040	Men	std84	Projected	0.391484
Hungary	2041	Men	std84	Projected	0.383428
Hungary	2042	Men	std84	Projected	0.376219
Hungary	2043	Men	std84	Projected	0.369655
Hungary	2044	Men	std84	Projected	0.363854
Hungary	2045	Men	std84	Projected	0.358645
Hungary	2046	Men	std84	Projected	0.35401
Hungary	2047	Men	std84	Projected	0.34969
Hungary	2048	Men	std84	Projected	0.345977
Hungary	2049	Men	std84	Projected	0.342513
Hungary	2050	Men	std84	Projected	0.339403
Hungary	2051	Men	std84	Projected	0.336536
Hungary	2052	Men	std84	Projected	0.333847
Hungary	2053	Men	std84	Projected	0.331363
Hungary	2054	Men	std84	Projected	0.328978
Hungary	2055	Men	std84	Projected	0.326711
Hungary	2056	Men	std84	Projected	0.324598
Hungary	2057	Men	std84	Projected	0.322517
Hungary	2058	Men	std84	Projected	0.320555
Hungary	2059	Men	std84	Projected	0.318614
Hungary	2060	Men	std84	Projected	0.316702
Hungary	2061	Men	std84	Projected	0.314815
Hungary	2062	Men	std84	Projected	0.312886
Hungary	2063	Men	std84	Projected	0.310947
Hungary	2064	Men	std84	Projected	0.308991
Hungary	2065	Men	std84	Projected	0.306998
Ireland	1990	Men	std84	Observed	0.379477
Ireland	1991	Men	std84	Observed	0.378124
Ireland	1992	Men	std84	Observed	0.384383
Ireland	1993	Men	std84	Observed	0.401011
Ireland	1994	Men	std84	Observed	0.391418
Ireland	1995	Men	std84	Observed	0.383387
Ireland	1996	Men	std84	Observed	0.372713
Ireland	1997	Men	std84	Observed	0.365077
Ireland	1998	Men	std84	Observed	0.387321
Ireland	1999	Men	std84	Observed	0.374965
Ireland	2000	Men	std84	Observed	0.385978
Ireland	2001	Men	std84	Observed	0.380178
Ireland	2002	Men	std84	Observed	0.3753
Ireland	2003	Men	std84	Observed	0.377203
Ireland	2004	Men	std84	Observed	0.372788
Ireland	2005	Men	std84	Observed	0.367737
Ireland	2006	Men	std84	Observed	0.374888
Ireland	2007	Men	std84	Observed	0.376565
Ireland	2008	Men	std84	Observed	0.364329
Ireland	2009	Men	std84	Observed	0.37781
Ireland	2010	Men	std84	Observed	0.352982
Ireland	2011	Men	std84	Observed	0.366559
Ireland	2012	Men	std84	Observed	0.35932
Ireland	2013	Men	std84	Observed	0.357548
Ireland	2014	Men	std84	Observed	0.353999
Ireland	2015	Men	std84	Projected	0.343457
Ireland	2016	Men	std84	Projected	0.338659
Ireland	2017	Men	std84	Projected	0.334066
Ireland	2018	Men	std84	Projected	0.328989
Ireland	2019	Men	std84	Projected	0.323947
Ireland	2020	Men	std84	Projected	0.31909
Ireland	2021	Men	std84	Projected	0.314219
Ireland	2022	Men	std84	Projected	0.309352
Ireland	2023	Men	std84	Projected	0.304747
Ireland	2024	Men	std84	Projected	0.300092
Ireland	2025	Men	std84	Projected	0.296034
Ireland	2026	Men	std84	Projected	0.292042
Ireland	2027	Men	std84	Projected	0.288067
Ireland	2028	Men	std84	Projected	0.28437
Ireland	2029	Men	std84	Projected	0.280767
Ireland	2030	Men	std84	Projected	0.277486
Ireland	2031	Men	std84	Projected	0.274344
Ireland	2032	Men	std84	Projected	0.271216
Ireland	2033	Men	std84	Projected	0.268359
Ireland	2034	Men	std84	Projected	0.265642
Ireland	2035	Men	std84	Projected	0.262791
Ireland	2036	Men	std84	Projected	0.260231
Ireland	2037	Men	std84	Projected	0.257817
Ireland	2038	Men	std84	Projected	0.255532
Ireland	2039	Men	std84	Projected	0.253091
Ireland	2040	Men	std84	Projected	0.250605
Ireland	2041	Men	std84	Projected	0.248233
Ireland	2042	Men	std84	Projected	0.2459
Ireland	2043	Men	std84	Projected	0.243519
Ireland	2044	Men	std84	Projected	0.240997
Ireland	2045	Men	std84	Projected	0.238518
Ireland	2046	Men	std84	Projected	0.235935
Ireland	2047	Men	std84	Projected	0.233254
Ireland	2048	Men	std84	Projected	0.230642
Ireland	2049	Men	std84	Projected	0.227948
Ireland	2050	Men	std84	Projected	0.22516
Ireland	2051	Men	std84	Projected	0.222358
Ireland	2052	Men	std84	Projected	0.219513
Ireland	2053	Men	std84	Projected	0.216601
Ireland	2054	Men	std84	Projected	0.213685
Ireland	2055	Men	std84	Projected	0.210708
Ireland	2056	Men	std84	Projected	0.207777
Ireland	2057	Men	std84	Projected	0.204736
Ireland	2058	Men	std84	Projected	0.201705
Ireland	2059	Men	std84	Projected	0.19865
Ireland	2060	Men	std84	Projected	0.195536
Ireland	2061	Men	std84	Projected	0.192427
Ireland	2062	Men	std84	Projected	0.189342
Ireland	2063	Men	std84	Projected	0.186257
Ireland	2064	Men	std84	Projected	0.183166
Ireland	2065	Men	std84	Projected	0.180108
Italy	1990	Men	std84	Observed	0.420008
Italy	1991	Men	std84	Observed	0.419459
Italy	1992	Men	std84	Observed	0.420043
Italy	1993	Men	std84	Observed	0.417722
Italy	1994	Men	std84	Observed	0.414855
Italy	1995	Men	std84	Observed	0.40971
Italy	1996	Men	std84	Observed	0.406766
Italy	1997	Men	std84	Observed	0.403621
Italy	1998	Men	std84	Observed	0.402037
Italy	1999	Men	std84	Observed	0.397813
Italy	2000	Men	std84	Observed	0.391333
Italy	2001	Men	std84	Observed	0.390701
Italy	2002	Men	std84	Observed	0.387102
Italy	2003	Men	std84	Observed	0.384041
Italy	2004	Men	std84	Observed	0.377709
Italy	2005	Men	std84	Observed	0.373315
Italy	2006	Men	std84	Observed	0.371082
Italy	2007	Men	std84	Observed	0.366445
Italy	2008	Men	std84	Observed	0.361018
Italy	2009	Men	std84	Observed	0.356561
Italy	2010	Men	std84	Observed	0.354537
Italy	2011	Men	std84	Observed	0.351407
Italy	2012	Men	std84	Observed	0.345027
Italy	2013	Men	std84	Observed	0.341407
Italy	2014	Men	std84	Observed	0.338908
Italy	2015	Men	std84	Projected	0.330378
Italy	2016	Men	std84	Projected	0.324363
Italy	2017	Men	std84	Projected	0.318756
Italy	2018	Men	std84	Projected	0.313092
Italy	2019	Men	std84	Projected	0.3076
Italy	2020	Men	std84	Projected	0.302385
Italy	2021	Men	std84	Projected	0.297444
Italy	2022	Men	std84	Projected	0.292848
Italy	2023	Men	std84	Projected	0.288554
Italy	2024	Men	std84	Projected	0.284534
Italy	2025	Men	std84	Projected	0.280834
Italy	2026	Men	std84	Projected	0.277354
Italy	2027	Men	std84	Projected	0.27414
Italy	2028	Men	std84	Projected	0.271174
Italy	2029	Men	std84	Projected	0.268387
Italy	2030	Men	std84	Projected	0.265759
Italy	2031	Men	std84	Projected	0.263293
Italy	2032	Men	std84	Projected	0.261037
Italy	2033	Men	std84	Projected	0.258831
Italy	2034	Men	std84	Projected	0.256796
Italy	2035	Men	std84	Projected	0.254849
Italy	2036	Men	std84	Projected	0.252998
Italy	2037	Men	std84	Projected	0.25118
Italy	2038	Men	std84	Projected	0.249362
Italy	2039	Men	std84	Projected	0.24759
Italy	2040	Men	std84	Projected	0.245858
Italy	2041	Men	std84	Projected	0.244127
Italy	2042	Men	std84	Projected	0.242387
Italy	2043	Men	std84	Projected	0.240655
Italy	2044	Men	std84	Projected	0.23892
Italy	2045	Men	std84	Projected	0.237167
Italy	2046	Men	std84	Projected	0.235376
Italy	2047	Men	std84	Projected	0.233548
Italy	2048	Men	std84	Projected	0.231683
Italy	2049	Men	std84	Projected	0.229809
Italy	2050	Men	std84	Projected	0.227893
Italy	2051	Men	std84	Projected	0.225937
Italy	2052	Men	std84	Projected	0.223924
Italy	2053	Men	std84	Projected	0.221903
Italy	2054	Men	std84	Projected	0.219813
Italy	2055	Men	std84	Projected	0.217756
Italy	2056	Men	std84	Projected	0.215631
Italy	2057	Men	std84	Projected	0.213504
Italy	2058	Men	std84	Projected	0.211348
Italy	2059	Men	std84	Projected	0.209181
Italy	2060	Men	std84	Projected	0.206998
Italy	2061	Men	std84	Projected	0.204822
Italy	2062	Men	std84	Projected	0.202623
Italy	2063	Men	std84	Projected	0.200451
Italy	2064	Men	std84	Projected	0.19828
Italy	2065	Men	std84	Projected	0.196143
Netherlands	1990	Men	std84	Observed	0.438097
Netherlands	1991	Men	std84	Observed	0.438199
Netherlands	1992	Men	std84	Observed	0.437059
Netherlands	1993	Men	std84	Observed	0.434412
Netherlands	1994	Men	std84	Observed	0.428129
Netherlands	1995	Men	std84	Observed	0.425082
Netherlands	1996	Men	std84	Observed	0.419345
Netherlands	1997	Men	std84	Observed	0.417484
Netherlands	1998	Men	std84	Observed	0.413513
Netherlands	1999	Men	std84	Observed	0.408935
Netherlands	2000	Men	std84	Observed	0.396001
Netherlands	2001	Men	std84	Observed	0.397708
Netherlands	2002	Men	std84	Observed	0.395708
Netherlands	2003	Men	std84	Observed	0.384186
Netherlands	2004	Men	std84	Observed	0.393964
Netherlands	2005	Men	std84	Observed	0.388748
Netherlands	2006	Men	std84	Observed	0.381398
Netherlands	2007	Men	std84	Observed	0.380422
Netherlands	2008	Men	std84	Observed	0.376268
Netherlands	2009	Men	std84	Observed	0.373401
Netherlands	2010	Men	std84	Observed	0.376321
Netherlands	2011	Men	std84	Observed	0.373399
Netherlands	2012	Men	std84	Observed	0.364136
Netherlands	2013	Men	std84	Observed	0.357583
Netherlands	2014	Men	std84	Observed	0.356193
Netherlands	2015	Men	std84	Observed	0.352328
Netherlands	2015	Men	std84	Projected	0.352328
Netherlands	2016	Men	std84	Observed	0.355637
Netherlands	2016	Men	std84	Projected	0.355637
Netherlands	2017	Men	std84	Projected	0.348709
Netherlands	2018	Men	std84	Projected	0.348975
Netherlands	2019	Men	std84	Projected	0.345348
Netherlands	2020	Men	std84	Projected	0.34312
Netherlands	2021	Men	std84	Projected	0.340326
Netherlands	2022	Men	std84	Projected	0.337751
Netherlands	2023	Men	std84	Projected	0.335349
Netherlands	2024	Men	std84	Projected	0.332875
Netherlands	2025	Men	std84	Projected	0.330465
Netherlands	2026	Men	std84	Projected	0.328017
Netherlands	2027	Men	std84	Projected	0.325477
Netherlands	2028	Men	std84	Projected	0.322767
Netherlands	2029	Men	std84	Projected	0.320146
Netherlands	2030	Men	std84	Projected	0.317263
Netherlands	2031	Men	std84	Projected	0.314408
Netherlands	2032	Men	std84	Projected	0.311491
Netherlands	2033	Men	std84	Projected	0.308308
Netherlands	2034	Men	std84	Projected	0.304994
Netherlands	2035	Men	std84	Projected	0.30161
Netherlands	2036	Men	std84	Projected	0.298147
Netherlands	2037	Men	std84	Projected	0.294743
Netherlands	2038	Men	std84	Projected	0.29107
Netherlands	2039	Men	std84	Projected	0.287323
Netherlands	2040	Men	std84	Projected	0.283423
Netherlands	2041	Men	std84	Projected	0.279405
Netherlands	2042	Men	std84	Projected	0.275211
Netherlands	2043	Men	std84	Projected	0.271066
Netherlands	2044	Men	std84	Projected	0.266758
Netherlands	2045	Men	std84	Projected	0.262368
Netherlands	2046	Men	std84	Projected	0.257887
Netherlands	2047	Men	std84	Projected	0.253414
Netherlands	2048	Men	std84	Projected	0.248927
Netherlands	2049	Men	std84	Projected	0.244393
Netherlands	2050	Men	std84	Projected	0.239924
Netherlands	2051	Men	std84	Projected	0.235442
Netherlands	2052	Men	std84	Projected	0.23105
Netherlands	2053	Men	std84	Projected	0.226623
Netherlands	2054	Men	std84	Projected	0.222291
Netherlands	2055	Men	std84	Projected	0.218009
Netherlands	2056	Men	std84	Projected	0.213832
Netherlands	2057	Men	std84	Projected	0.209771
Netherlands	2058	Men	std84	Projected	0.20576
Netherlands	2059	Men	std84	Projected	0.201657
Netherlands	2060	Men	std84	Projected	0.197701
Netherlands	2061	Men	std84	Projected	0.1939
Netherlands	2062	Men	std84	Projected	0.19022
Netherlands	2063	Men	std84	Projected	0.186509
Netherlands	2064	Men	std84	Projected	0.183033
Netherlands	2065	Men	std84	Projected	0.179681
Norway	1990	Men	std84	Observed	0.272769
Norway	1991	Men	std84	Observed	0.28072
Norway	1992	Men	std84	Observed	0.278876
Norway	1993	Men	std84	Observed	0.291835
Norway	1994	Men	std84	Observed	0.293548
Norway	1995	Men	std84	Observed	0.292456
Norway	1996	Men	std84	Observed	0.295027
Norway	1997	Men	std84	Observed	0.296635
Norway	1998	Men	std84	Observed	0.296469
Norway	1999	Men	std84	Observed	0.306347
Norway	2000	Men	std84	Observed	0.300589
Norway	2001	Men	std84	Observed	0.302558
Norway	2002	Men	std84	Observed	0.314217
Norway	2003	Men	std84	Observed	0.314726
Norway	2004	Men	std84	Observed	0.313334
Norway	2005	Men	std84	Observed	0.310246
Norway	2006	Men	std84	Observed	0.318015
Norway	2007	Men	std84	Observed	0.314145
Norway	2008	Men	std84	Observed	0.312093
Norway	2009	Men	std84	Observed	0.315939
Norway	2010	Men	std84	Observed	0.308855
Norway	2011	Men	std84	Observed	0.311608
Norway	2012	Men	std84	Observed	0.302073
Norway	2013	Men	std84	Observed	0.300483
Norway	2014	Men	std84	Observed	0.29584
Norway	2015	Men	std84	Projected	0.283007
Norway	2016	Men	std84	Projected	0.270789
Norway	2017	Men	std84	Projected	0.275612
Norway	2018	Men	std84	Projected	0.267977
Norway	2019	Men	std84	Projected	0.269208
Norway	2020	Men	std84	Projected	0.264069
Norway	2021	Men	std84	Projected	0.263572
Norway	2022	Men	std84	Projected	0.259962
Norway	2023	Men	std84	Projected	0.258505
Norway	2024	Men	std84	Projected	0.255644
Norway	2025	Men	std84	Projected	0.253938
Norway	2026	Men	std84	Projected	0.251527
Norway	2027	Men	std84	Projected	0.249754
Norway	2028	Men	std84	Projected	0.247723
Norway	2029	Men	std84	Projected	0.246038
Norway	2030	Men	std84	Projected	0.244166
Norway	2031	Men	std84	Projected	0.24256
Norway	2032	Men	std84	Projected	0.240888
Norway	2033	Men	std84	Projected	0.239385
Norway	2034	Men	std84	Projected	0.237905
Norway	2035	Men	std84	Projected	0.236331
Norway	2036	Men	std84	Projected	0.234837
Norway	2037	Men	std84	Projected	0.233138
Norway	2038	Men	std84	Projected	0.231456
Norway	2039	Men	std84	Projected	0.229676
Norway	2040	Men	std84	Projected	0.227865
Norway	2041	Men	std84	Projected	0.22596
Norway	2042	Men	std84	Projected	0.223989
Norway	2043	Men	std84	Projected	0.221878
Norway	2044	Men	std84	Projected	0.219699
Norway	2045	Men	std84	Projected	0.217528
Norway	2046	Men	std84	Projected	0.215289
Norway	2047	Men	std84	Projected	0.212903
Norway	2048	Men	std84	Projected	0.210448
Norway	2049	Men	std84	Projected	0.207935
Norway	2050	Men	std84	Projected	0.205397
Norway	2051	Men	std84	Projected	0.202809
Norway	2052	Men	std84	Projected	0.200022
Norway	2053	Men	std84	Projected	0.19728
Norway	2054	Men	std84	Projected	0.194419
Norway	2055	Men	std84	Projected	0.191577
Norway	2056	Men	std84	Projected	0.188705
Norway	2057	Men	std84	Projected	0.185804
Norway	2058	Men	std84	Projected	0.18294
Norway	2059	Men	std84	Projected	0.179944
Norway	2060	Men	std84	Projected	0.177077
Norway	2061	Men	std84	Projected	0.174135
Norway	2062	Men	std84	Projected	0.171277
Norway	2063	Men	std84	Projected	0.168411
Norway	2064	Men	std84	Projected	0.165593
Norway	2065	Men	std84	Projected	0.162834
Poland	1990	Men	std84	Observed	0.494858
Poland	1991	Men	std84	Observed	0.497514
Poland	1992	Men	std84	Observed	0.502158
Poland	1993	Men	std84	Observed	0.508182
Poland	1994	Men	std84	Observed	0.510299
Poland	1995	Men	std84	Observed	0.517333
Poland	1996	Men	std84	Observed	0.517077
Poland	1997	Men	std84	Observed	0.52081
Poland	1998	Men	std84	Observed	0.523414
Poland	1999	Men	std84	Observed	0.524392
Poland	2000	Men	std84	Observed	0.528745
Poland	2001	Men	std84	Observed	0.532487
Poland	2002	Men	std84	Observed	0.53653
Poland	2003	Men	std84	Observed	0.535118
Poland	2004	Men	std84	Observed	0.535108
Poland	2005	Men	std84	Observed	0.534768
Poland	2006	Men	std84	Observed	0.53339
Poland	2007	Men	std84	Observed	0.529071
Poland	2008	Men	std84	Observed	0.531051
Poland	2009	Men	std84	Observed	0.52337
Poland	2010	Men	std84	Observed	0.516225
Poland	2011	Men	std84	Observed	0.512541
Poland	2012	Men	std84	Observed	0.51214
Poland	2013	Men	std84	Observed	0.506608
Poland	2014	Men	std84	Observed	0.496351
Poland	2015	Men	std84	Projected	0.480078
Poland	2016	Men	std84	Projected	0.471044
Poland	2017	Men	std84	Projected	0.462165
Poland	2018	Men	std84	Projected	0.452957
Poland	2019	Men	std84	Projected	0.443979
Poland	2020	Men	std84	Projected	0.435177
Poland	2021	Men	std84	Projected	0.426806
Poland	2022	Men	std84	Projected	0.418858
Poland	2023	Men	std84	Projected	0.411318
Poland	2024	Men	std84	Projected	0.40444
Poland	2025	Men	std84	Projected	0.39777
Poland	2026	Men	std84	Projected	0.391424
Poland	2027	Men	std84	Projected	0.385465
Poland	2028	Men	std84	Projected	0.379798
Poland	2029	Men	std84	Projected	0.374399
Poland	2030	Men	std84	Projected	0.36905
Poland	2031	Men	std84	Projected	0.363926
Poland	2032	Men	std84	Projected	0.358805
Poland	2033	Men	std84	Projected	0.354009
Poland	2034	Men	std84	Projected	0.349217
Poland	2035	Men	std84	Projected	0.344493
Poland	2036	Men	std84	Projected	0.339929
Poland	2037	Men	std84	Projected	0.335467
Poland	2038	Men	std84	Projected	0.330967
Poland	2039	Men	std84	Projected	0.326786
Poland	2040	Men	std84	Projected	0.322518
Poland	2041	Men	std84	Projected	0.318562
Poland	2042	Men	std84	Projected	0.314676
Poland	2043	Men	std84	Projected	0.310753
Poland	2044	Men	std84	Projected	0.306832
Poland	2045	Men	std84	Projected	0.303229
Poland	2046	Men	std84	Projected	0.299657
Poland	2047	Men	std84	Projected	0.296128
Poland	2048	Men	std84	Projected	0.292561
Poland	2049	Men	std84	Projected	0.289172
Poland	2050	Men	std84	Projected	0.285851
Poland	2051	Men	std84	Projected	0.282519
Poland	2052	Men	std84	Projected	0.279184
Poland	2053	Men	std84	Projected	0.275898
Poland	2054	Men	std84	Projected	0.272703
Poland	2055	Men	std84	Projected	0.269527
Poland	2056	Men	std84	Projected	0.266376
Poland	2057	Men	std84	Projected	0.263295
Poland	2058	Men	std84	Projected	0.260182
Poland	2059	Men	std84	Projected	0.257066
Poland	2060	Men	std84	Projected	0.254048
Poland	2061	Men	std84	Projected	0.250994
Poland	2062	Men	std84	Projected	0.247959
Poland	2063	Men	std84	Projected	0.244947
Poland	2064	Men	std84	Projected	0.24199
Poland	2065	Men	std84	Projected	0.239065
Slovenia	1990	Men	std84	Observed	0.463513
Slovenia	1991	Men	std84	Observed	0.4606
Slovenia	1992	Men	std84	Observed	0.466246
Slovenia	1993	Men	std84	Observed	0.472763
Slovenia	1994	Men	std84	Observed	0.470209
Slovenia	1995	Men	std84	Observed	0.471196
Slovenia	1996	Men	std84	Observed	0.461466
Slovenia	1997	Men	std84	Observed	0.454745
Slovenia	1998	Men	std84	Observed	0.45511
Slovenia	1999	Men	std84	Observed	0.451937
Slovenia	2000	Men	std84	Observed	0.445093
Slovenia	2001	Men	std84	Observed	0.440719
Slovenia	2002	Men	std84	Observed	0.431129
Slovenia	2003	Men	std84	Observed	0.432647
Slovenia	2004	Men	std84	Observed	0.437652
Slovenia	2005	Men	std84	Observed	0.437178
Slovenia	2006	Men	std84	Observed	0.430439
Slovenia	2007	Men	std84	Observed	0.431133
Slovenia	2008	Men	std84	Observed	0.423097
Slovenia	2009	Men	std84	Observed	0.398388
Slovenia	2010	Men	std84	Observed	0.409707
Slovenia	2011	Men	std84	Observed	0.403804
Slovenia	2012	Men	std84	Observed	0.400761
Slovenia	2013	Men	std84	Observed	0.384215
Slovenia	2014	Men	std84	Observed	0.391521
Slovenia	2015	Men	std84	Projected	0.36862
Slovenia	2016	Men	std84	Projected	0.361055
Slovenia	2017	Men	std84	Projected	0.353847
Slovenia	2018	Men	std84	Projected	0.346719
Slovenia	2019	Men	std84	Projected	0.339769
Slovenia	2020	Men	std84	Projected	0.333065
Slovenia	2021	Men	std84	Projected	0.326928
Slovenia	2022	Men	std84	Projected	0.320987
Slovenia	2023	Men	std84	Projected	0.315358
Slovenia	2024	Men	std84	Projected	0.310257
Slovenia	2025	Men	std84	Projected	0.30527
Slovenia	2026	Men	std84	Projected	0.300499
Slovenia	2027	Men	std84	Projected	0.296036
Slovenia	2028	Men	std84	Projected	0.292023
Slovenia	2029	Men	std84	Projected	0.288243
Slovenia	2030	Men	std84	Projected	0.284563
Slovenia	2031	Men	std84	Projected	0.28115
Slovenia	2032	Men	std84	Projected	0.278083
Slovenia	2033	Men	std84	Projected	0.274963
Slovenia	2034	Men	std84	Projected	0.272272
Slovenia	2035	Men	std84	Projected	0.269721
Slovenia	2036	Men	std84	Projected	0.267294
Slovenia	2037	Men	std84	Projected	0.264847
Slovenia	2038	Men	std84	Projected	0.262495
Slovenia	2039	Men	std84	Projected	0.260346
Slovenia	2040	Men	std84	Projected	0.258277
Slovenia	2041	Men	std84	Projected	0.256198
Slovenia	2042	Men	std84	Projected	0.254112
Slovenia	2043	Men	std84	Projected	0.252197
Slovenia	2044	Men	std84	Projected	0.250201
Slovenia	2045	Men	std84	Projected	0.248244
Slovenia	2046	Men	std84	Projected	0.246343
Slovenia	2047	Men	std84	Projected	0.244393
Slovenia	2048	Men	std84	Projected	0.242461
Slovenia	2049	Men	std84	Projected	0.24052
Slovenia	2050	Men	std84	Projected	0.238522
Slovenia	2051	Men	std84	Projected	0.236558
Slovenia	2052	Men	std84	Projected	0.234529
Slovenia	2053	Men	std84	Projected	0.232498
Slovenia	2054	Men	std84	Projected	0.230428
Slovenia	2055	Men	std84	Projected	0.228358
Slovenia	2056	Men	std84	Projected	0.226197
Slovenia	2057	Men	std84	Projected	0.224047
Slovenia	2058	Men	std84	Projected	0.22187
Slovenia	2059	Men	std84	Projected	0.219617
Slovenia	2060	Men	std84	Projected	0.217313
Slovenia	2061	Men	std84	Projected	0.215031
Slovenia	2062	Men	std84	Projected	0.21271
Slovenia	2063	Men	std84	Projected	0.210325
Slovenia	2064	Men	std84	Projected	0.207927
Slovenia	2065	Men	std84	Projected	0.205538
Sweden	1990	Men	std84	Observed	0.234923
Sweden	1991	Men	std84	Observed	0.243394
Sweden	1992	Men	std84	Observed	0.241657
Sweden	1993	Men	std84	Observed	0.238161
Sweden	1994	Men	std84	Observed	0.248502
Sweden	1995	Men	std84	Observed	0.246851
Sweden	1996	Men	std84	Observed	0.244978
Sweden	1997	Men	std84	Observed	0.254809
Sweden	1998	Men	std84	Observed	0.250857
Sweden	1999	Men	std84	Observed	0.25785
Sweden	2000	Men	std84	Observed	0.253293
Sweden	2001	Men	std84	Observed	0.255306
Sweden	2002	Men	std84	Observed	0.256253
Sweden	2003	Men	std84	Observed	0.262037
Sweden	2004	Men	std84	Observed	0.262519
Sweden	2005	Men	std84	Observed	0.265514
Sweden	2006	Men	std84	Observed	0.260981
Sweden	2007	Men	std84	Observed	0.256685
Sweden	2008	Men	std84	Observed	0.260893
Sweden	2009	Men	std84	Observed	0.255157
Sweden	2010	Men	std84	Observed	0.258844
Sweden	2011	Men	std84	Observed	0.253415
Sweden	2012	Men	std84	Observed	0.251378
Sweden	2013	Men	std84	Observed	0.251016
Sweden	2014	Men	std84	Observed	0.248332
Sweden	2015	Men	std84	Observed	0.247187
Sweden	2015	Men	std84	Projected	0.247187
Sweden	2016	Men	std84	Observed	0.248253
Sweden	2016	Men	std84	Projected	0.248253
Sweden	2017	Men	std84	Projected	0.23184
Sweden	2018	Men	std84	Projected	0.23176
Sweden	2019	Men	std84	Projected	0.231373
Sweden	2020	Men	std84	Projected	0.23078
Sweden	2021	Men	std84	Projected	0.23003
Sweden	2022	Men	std84	Projected	0.229211
Sweden	2023	Men	std84	Projected	0.228393
Sweden	2024	Men	std84	Projected	0.227528
Sweden	2025	Men	std84	Projected	0.226671
Sweden	2026	Men	std84	Projected	0.225796
Sweden	2027	Men	std84	Projected	0.224974
Sweden	2028	Men	std84	Projected	0.224126
Sweden	2029	Men	std84	Projected	0.223268
Sweden	2030	Men	std84	Projected	0.222432
Sweden	2031	Men	std84	Projected	0.221557
Sweden	2032	Men	std84	Projected	0.220671
Sweden	2033	Men	std84	Projected	0.21979
Sweden	2034	Men	std84	Projected	0.218903
Sweden	2035	Men	std84	Projected	0.218003
Sweden	2036	Men	std84	Projected	0.217052
Sweden	2037	Men	std84	Projected	0.216023
Sweden	2038	Men	std84	Projected	0.214993
Sweden	2039	Men	std84	Projected	0.213913
Sweden	2040	Men	std84	Projected	0.212763
Sweden	2041	Men	std84	Projected	0.211538
Sweden	2042	Men	std84	Projected	0.21026
Sweden	2043	Men	std84	Projected	0.208918
Sweden	2044	Men	std84	Projected	0.20752
Sweden	2045	Men	std84	Projected	0.206029
Sweden	2046	Men	std84	Projected	0.204478
Sweden	2047	Men	std84	Projected	0.202874
Sweden	2048	Men	std84	Projected	0.201191
Sweden	2049	Men	std84	Projected	0.199431
Sweden	2050	Men	std84	Projected	0.197584
Sweden	2051	Men	std84	Projected	0.195691
Sweden	2052	Men	std84	Projected	0.19374
Sweden	2053	Men	std84	Projected	0.191704
Sweden	2054	Men	std84	Projected	0.189642
Sweden	2055	Men	std84	Projected	0.187527
Sweden	2056	Men	std84	Projected	0.185356
Sweden	2057	Men	std84	Projected	0.183155
Sweden	2058	Men	std84	Projected	0.180906
Sweden	2059	Men	std84	Projected	0.178646
Sweden	2060	Men	std84	Projected	0.176356
Sweden	2061	Men	std84	Projected	0.174061
Sweden	2062	Men	std84	Projected	0.171761
Sweden	2063	Men	std84	Projected	0.16945
Sweden	2064	Men	std84	Projected	0.167138
Sweden	2065	Men	std84	Projected	0.164842
Switzerland	1990	Men	std84	Observed	0.371038
Switzerland	1991	Men	std84	Observed	0.367875
Switzerland	1992	Men	std84	Observed	0.36612
Switzerland	1993	Men	std84	Observed	0.362552
Switzerland	1994	Men	std84	Observed	0.35249
Switzerland	1995	Men	std84	Observed	0.335488
Switzerland	1996	Men	std84	Observed	0.337529
Switzerland	1997	Men	std84	Observed	0.336469
Switzerland	1998	Men	std84	Observed	0.342836
Switzerland	1999	Men	std84	Observed	0.328132
Switzerland	2000	Men	std84	Observed	0.336847
Switzerland	2001	Men	std84	Observed	0.336773
Switzerland	2002	Men	std84	Observed	0.32616
Switzerland	2003	Men	std84	Observed	0.328828
Switzerland	2004	Men	std84	Observed	0.322938
Switzerland	2005	Men	std84	Observed	0.331714
Switzerland	2006	Men	std84	Observed	0.318746
Switzerland	2007	Men	std84	Observed	0.322399
Switzerland	2008	Men	std84	Observed	0.328636
Switzerland	2009	Men	std84	Observed	0.312255
Switzerland	2010	Men	std84	Observed	0.317694
Switzerland	2011	Men	std84	Observed	0.312985
Switzerland	2012	Men	std84	Observed	0.301289
Switzerland	2013	Men	std84	Observed	0.298073
Switzerland	2014	Men	std84	Observed	0.302294
Switzerland	2015	Men	std84	Observed	0.299303
Switzerland	2015	Men	std84	Projected	0.299303
Switzerland	2016	Men	std84	Projected	0.280206
Switzerland	2017	Men	std84	Projected	0.279444
Switzerland	2018	Men	std84	Projected	0.278198
Switzerland	2019	Men	std84	Projected	0.277251
Switzerland	2020	Men	std84	Projected	0.276417
Switzerland	2021	Men	std84	Projected	0.275701
Switzerland	2022	Men	std84	Projected	0.275013
Switzerland	2023	Men	std84	Projected	0.274447
Switzerland	2024	Men	std84	Projected	0.274114
Switzerland	2025	Men	std84	Projected	0.273767
Switzerland	2026	Men	std84	Projected	0.273473
Switzerland	2027	Men	std84	Projected	0.273324
Switzerland	2028	Men	std84	Projected	0.273309
Switzerland	2029	Men	std84	Projected	0.273345
Switzerland	2030	Men	std84	Projected	0.273326
Switzerland	2031	Men	std84	Projected	0.273339
Switzerland	2032	Men	std84	Projected	0.273433
Switzerland	2033	Men	std84	Projected	0.273552
Switzerland	2034	Men	std84	Projected	0.273695
Switzerland	2035	Men	std84	Projected	0.273805
Switzerland	2036	Men	std84	Projected	0.273887
Switzerland	2037	Men	std84	Projected	0.273894
Switzerland	2038	Men	std84	Projected	0.274011
Switzerland	2039	Men	std84	Projected	0.274209
Switzerland	2040	Men	std84	Projected	0.27417
Switzerland	2041	Men	std84	Projected	0.274195
Switzerland	2042	Men	std84	Projected	0.274167
Switzerland	2043	Men	std84	Projected	0.274084
Switzerland	2044	Men	std84	Projected	0.274016
Switzerland	2045	Men	std84	Projected	0.273924
Switzerland	2046	Men	std84	Projected	0.273654
Switzerland	2047	Men	std84	Projected	0.273369
Switzerland	2048	Men	std84	Projected	0.27303
Switzerland	2049	Men	std84	Projected	0.272661
Switzerland	2050	Men	std84	Projected	0.272287
Switzerland	2051	Men	std84	Projected	0.271787
Switzerland	2052	Men	std84	Projected	0.271188
Switzerland	2053	Men	std84	Projected	0.270537
Switzerland	2054	Men	std84	Projected	0.269798
Switzerland	2055	Men	std84	Projected	0.269022
Switzerland	2056	Men	std84	Projected	0.268114
Switzerland	2057	Men	std84	Projected	0.267232
Switzerland	2058	Men	std84	Projected	0.266234
Switzerland	2059	Men	std84	Projected	0.265134
Switzerland	2060	Men	std84	Projected	0.264019
Switzerland	2061	Men	std84	Projected	0.262847
Switzerland	2062	Men	std84	Projected	0.261539
Switzerland	2063	Men	std84	Projected	0.260194
Switzerland	2064	Men	std84	Projected	0.258735
Switzerland	2065	Men	std84	Projected	0.257232
United Kingdom	1990	Men	std84	Observed	0.408072
United Kingdom	1991	Men	std84	Observed	0.405324
United Kingdom	1992	Men	std84	Observed	0.399493
United Kingdom	1993	Men	std84	Observed	0.392325
United Kingdom	1994	Men	std84	Observed	0.387513
United Kingdom	1995	Men	std84	Observed	0.381462
United Kingdom	1996	Men	std84	Observed	0.375838
United Kingdom	1997	Men	std84	Observed	0.369182
United Kingdom	1998	Men	std84	Observed	0.368812
United Kingdom	1999	Men	std84	Observed	0.361383
United Kingdom	2000	Men	std84	Observed	0.35901
United Kingdom	2001	Men	std84	Observed	0.358189
United Kingdom	2002	Men	std84	Observed	0.359754
United Kingdom	2003	Men	std84	Observed	0.353295
United Kingdom	2004	Men	std84	Observed	0.349202
United Kingdom	2005	Men	std84	Observed	0.351373
United Kingdom	2006	Men	std84	Observed	0.35248
United Kingdom	2007	Men	std84	Observed	0.349233
United Kingdom	2008	Men	std84	Observed	0.347364
United Kingdom	2009	Men	std84	Observed	0.347906
United Kingdom	2010	Men	std84	Observed	0.342639
United Kingdom	2011	Men	std84	Observed	0.341421
United Kingdom	2012	Men	std84	Observed	0.33929
United Kingdom	2013	Men	std84	Observed	0.340166
United Kingdom	2014	Men	std84	Observed	0.339681
United Kingdom	2015	Men	std84	Observed	0.335589
United Kingdom	2015	Men	std84	Projected	0.335589
United Kingdom	2016	Men	std84	Projected	0.321538
United Kingdom	2017	Men	std84	Projected	0.319137
United Kingdom	2018	Men	std84	Projected	0.316599
United Kingdom	2019	Men	std84	Projected	0.313949
United Kingdom	2020	Men	std84	Projected	0.31134
United Kingdom	2021	Men	std84	Projected	0.308794
United Kingdom	2022	Men	std84	Projected	0.30633
United Kingdom	2023	Men	std84	Projected	0.30393
United Kingdom	2024	Men	std84	Projected	0.301641
United Kingdom	2025	Men	std84	Projected	0.299368
United Kingdom	2026	Men	std84	Projected	0.297217
United Kingdom	2027	Men	std84	Projected	0.294975
United Kingdom	2028	Men	std84	Projected	0.292763
United Kingdom	2029	Men	std84	Projected	0.29043
United Kingdom	2030	Men	std84	Projected	0.28816
United Kingdom	2031	Men	std84	Projected	0.285813
United Kingdom	2032	Men	std84	Projected	0.283437
United Kingdom	2033	Men	std84	Projected	0.281006
United Kingdom	2034	Men	std84	Projected	0.278484
United Kingdom	2035	Men	std84	Projected	0.275958
United Kingdom	2036	Men	std84	Projected	0.273347
United Kingdom	2037	Men	std84	Projected	0.270753
United Kingdom	2038	Men	std84	Projected	0.268017
United Kingdom	2039	Men	std84	Projected	0.265227
United Kingdom	2040	Men	std84	Projected	0.262459
United Kingdom	2041	Men	std84	Projected	0.259614
United Kingdom	2042	Men	std84	Projected	0.256666
United Kingdom	2043	Men	std84	Projected	0.253659
United Kingdom	2044	Men	std84	Projected	0.250618
United Kingdom	2045	Men	std84	Projected	0.247484
United Kingdom	2046	Men	std84	Projected	0.244259
United Kingdom	2047	Men	std84	Projected	0.241002
United Kingdom	2048	Men	std84	Projected	0.237661
United Kingdom	2049	Men	std84	Projected	0.234315
United Kingdom	2050	Men	std84	Projected	0.230879
United Kingdom	2051	Men	std84	Projected	0.227408
United Kingdom	2052	Men	std84	Projected	0.223893
United Kingdom	2053	Men	std84	Projected	0.220368
United Kingdom	2054	Men	std84	Projected	0.216804
United Kingdom	2055	Men	std84	Projected	0.213241
United Kingdom	2056	Men	std84	Projected	0.209678
United Kingdom	2057	Men	std84	Projected	0.206187
United Kingdom	2058	Men	std84	Projected	0.202698
United Kingdom	2059	Men	std84	Projected	0.199231
United Kingdom	2060	Men	std84	Projected	0.195798
United Kingdom	2061	Men	std84	Projected	0.192456
United Kingdom	2062	Men	std84	Projected	0.18913
United Kingdom	2063	Men	std84	Projected	0.185859
United Kingdom	2064	Men	std84	Projected	0.182684
United Kingdom	2065	Men	std84	Projected	0.17953
Austria	1990	Women	std84	Observed	0.157511
Austria	1991	Women	std84	Observed	0.167838
Austria	1992	Women	std84	Observed	0.167927
Austria	1993	Women	std84	Observed	0.169289
Austria	1994	Women	std84	Observed	0.175606
Austria	1995	Women	std84	Observed	0.169097
Austria	1996	Women	std84	Observed	0.179188
Austria	1997	Women	std84	Observed	0.184622
Austria	1998	Women	std84	Observed	0.183508
Austria	1999	Women	std84	Observed	0.185601
Austria	2000	Women	std84	Observed	0.18855
Austria	2001	Women	std84	Observed	0.186051
Austria	2002	Women	std84	Observed	0.19576
Austria	2003	Women	std84	Observed	0.193099
Austria	2004	Women	std84	Observed	0.198801
Austria	2005	Women	std84	Observed	0.196888
Austria	2006	Women	std84	Observed	0.201061
Austria	2007	Women	std84	Observed	0.21525
Austria	2008	Women	std84	Observed	0.215274
Austria	2009	Women	std84	Observed	0.210172
Austria	2010	Women	std84	Observed	0.225712
Austria	2011	Women	std84	Observed	0.225145
Austria	2012	Women	std84	Observed	0.233722
Austria	2013	Women	std84	Observed	0.229372
Austria	2014	Women	std84	Observed	0.243347
Austria	2015	Women	std84	Projected	0.243379
Austria	2016	Women	std84	Projected	0.24716
Austria	2017	Women	std84	Projected	0.251169
Austria	2018	Women	std84	Projected	0.254849
Austria	2019	Women	std84	Projected	0.258196
Austria	2020	Women	std84	Projected	0.261568
Austria	2021	Women	std84	Projected	0.264978
Austria	2022	Women	std84	Projected	0.26817
Austria	2023	Women	std84	Projected	0.270956
Austria	2024	Women	std84	Projected	0.273676
Austria	2025	Women	std84	Projected	0.276209
Austria	2026	Women	std84	Projected	0.278435
Austria	2027	Women	std84	Projected	0.280488
Austria	2028	Women	std84	Projected	0.282119
Austria	2029	Women	std84	Projected	0.283498
Austria	2030	Women	std84	Projected	0.284699
Austria	2031	Women	std84	Projected	0.285223
Austria	2032	Women	std84	Projected	0.285472
Austria	2033	Women	std84	Projected	0.285475
Austria	2034	Women	std84	Projected	0.285242
Austria	2035	Women	std84	Projected	0.284413
Austria	2036	Women	std84	Projected	0.283655
Austria	2037	Women	std84	Projected	0.282259
Austria	2038	Women	std84	Projected	0.280467
Austria	2039	Women	std84	Projected	0.278217
Austria	2040	Women	std84	Projected	0.275693
Austria	2041	Women	std84	Projected	0.27275
Austria	2042	Women	std84	Projected	0.269653
Austria	2043	Women	std84	Projected	0.266204
Austria	2044	Women	std84	Projected	0.26221
Austria	2045	Women	std84	Projected	0.258418
Austria	2046	Women	std84	Projected	0.254284
Austria	2047	Women	std84	Projected	0.249603
Austria	2048	Women	std84	Projected	0.244988
Austria	2049	Women	std84	Projected	0.240707
Austria	2050	Women	std84	Projected	0.236492
Austria	2051	Women	std84	Projected	0.232005
Austria	2052	Women	std84	Projected	0.227713
Austria	2053	Women	std84	Projected	0.22355
Austria	2054	Women	std84	Projected	0.219362
Austria	2055	Women	std84	Projected	0.215301
Austria	2056	Women	std84	Projected	0.210959
Austria	2057	Women	std84	Projected	0.206689
Austria	2058	Women	std84	Projected	0.202446
Austria	2059	Women	std84	Projected	0.198424
Austria	2060	Women	std84	Projected	0.194412
Austria	2061	Women	std84	Projected	0.190327
Austria	2062	Women	std84	Projected	0.186454
Austria	2063	Women	std84	Projected	0.182599
Austria	2064	Women	std84	Projected	0.178855
Austria	2065	Women	std84	Projected	0.175139
Belgium	1990	Women	std84	Observed	0.163212
Belgium	1991	Women	std84	Observed	0.170107
Belgium	1992	Women	std84	Observed	0.179868
Belgium	1993	Women	std84	Observed	0.178378
Belgium	1994	Women	std84	Observed	0.182741
Belgium	1995	Women	std84	Observed	0.185437
Belgium	1996	Women	std84	Observed	0.186434
Belgium	1997	Women	std84	Observed	0.196008
Belgium	1998	Women	std84	Observed	0.190586
Belgium	1999	Women	std84	Observed	0.189011
Belgium	2000	Women	std84	Observed	0.197022
Belgium	2001	Women	std84	Observed	0.194577
Belgium	2002	Women	std84	Observed	0.201109
Belgium	2003	Women	std84	Observed	0.20882
Belgium	2004	Women	std84	Observed	0.215255
Belgium	2005	Women	std84	Observed	0.221657
Belgium	2006	Women	std84	Observed	0.228983
Belgium	2007	Women	std84	Observed	0.232443
Belgium	2008	Women	std84	Observed	0.241736
Belgium	2009	Women	std84	Observed	0.239528
Belgium	2010	Women	std84	Observed	0.254157
Belgium	2011	Women	std84	Observed	0.258405
Belgium	2012	Women	std84	Observed	0.25014
Belgium	2013	Women	std84	Observed	0.264039
Belgium	2014	Women	std84	Observed	0.267832
Belgium	2015	Women	std84	Observed	0.267602
Belgium	2015	Women	std84	Projected	0.267602
Belgium	2016	Women	std84	Projected	0.266326
Belgium	2017	Women	std84	Projected	0.268572
Belgium	2018	Women	std84	Projected	0.270434
Belgium	2019	Women	std84	Projected	0.272005
Belgium	2020	Women	std84	Projected	0.27341
Belgium	2021	Women	std84	Projected	0.27453
Belgium	2022	Women	std84	Projected	0.27534
Belgium	2023	Women	std84	Projected	0.275924
Belgium	2024	Women	std84	Projected	0.275986
Belgium	2025	Women	std84	Projected	0.275823
Belgium	2026	Women	std84	Projected	0.275673
Belgium	2027	Women	std84	Projected	0.275012
Belgium	2028	Women	std84	Projected	0.274191
Belgium	2029	Women	std84	Projected	0.2729
Belgium	2030	Women	std84	Projected	0.271475
Belgium	2031	Women	std84	Projected	0.269538
Belgium	2032	Women	std84	Projected	0.267369
Belgium	2033	Women	std84	Projected	0.265048
Belgium	2034	Women	std84	Projected	0.262567
Belgium	2035	Women	std84	Projected	0.259619
Belgium	2036	Women	std84	Projected	0.256394
Belgium	2037	Women	std84	Projected	0.253276
Belgium	2038	Women	std84	Projected	0.249586
Belgium	2039	Women	std84	Projected	0.245893
Belgium	2040	Women	std84	Projected	0.24201
Belgium	2041	Women	std84	Projected	0.237869
Belgium	2042	Women	std84	Projected	0.233272
Belgium	2043	Women	std84	Projected	0.228386
Belgium	2044	Women	std84	Projected	0.223445
Belgium	2045	Women	std84	Projected	0.218234
Belgium	2046	Women	std84	Projected	0.213124
Belgium	2047	Women	std84	Projected	0.207858
Belgium	2048	Women	std84	Projected	0.202801
Belgium	2049	Women	std84	Projected	0.197656
Belgium	2050	Women	std84	Projected	0.192295
Belgium	2051	Women	std84	Projected	0.187472
Belgium	2052	Women	std84	Projected	0.182849
Belgium	2053	Women	std84	Projected	0.178425
Belgium	2054	Women	std84	Projected	0.174277
Belgium	2055	Women	std84	Projected	0.170416
Belgium	2056	Women	std84	Projected	0.167068
Belgium	2057	Women	std84	Projected	0.164125
Belgium	2058	Women	std84	Projected	0.16145
Belgium	2059	Women	std84	Projected	0.159002
Belgium	2060	Women	std84	Projected	0.156777
Belgium	2061	Women	std84	Projected	0.154717
Belgium	2062	Women	std84	Projected	0.152776
Belgium	2063	Women	std84	Projected	0.151002
Belgium	2064	Women	std84	Projected	0.149344
Belgium	2065	Women	std84	Projected	0.147763
Czech Republic	1990	Women	std84	Observed	0.19172
Czech Republic	1991	Women	std84	Observed	0.203393
Czech Republic	1992	Women	std84	Observed	0.202661
Czech Republic	1993	Women	std84	Observed	0.203361
Czech Republic	1994	Women	std84	Observed	0.215163
Czech Republic	1995	Women	std84	Observed	0.217189
Czech Republic	1996	Women	std84	Observed	0.221549
Czech Republic	1997	Women	std84	Observed	0.215683
Czech Republic	1998	Women	std84	Observed	0.227993
Czech Republic	1999	Women	std84	Observed	0.237015
Czech Republic	2000	Women	std84	Observed	0.238554
Czech Republic	2001	Women	std84	Observed	0.24455
Czech Republic	2002	Women	std84	Observed	0.242269
Czech Republic	2003	Women	std84	Observed	0.245166
Czech Republic	2004	Women	std84	Observed	0.244578
Czech Republic	2005	Women	std84	Observed	0.247756
Czech Republic	2006	Women	std84	Observed	0.254105
Czech Republic	2007	Women	std84	Observed	0.251302
Czech Republic	2008	Women	std84	Observed	0.256017
Czech Republic	2009	Women	std84	Observed	0.25114
Czech Republic	2010	Women	std84	Observed	0.261006
Czech Republic	2011	Women	std84	Observed	0.269266
Czech Republic	2012	Women	std84	Observed	0.274161
Czech Republic	2013	Women	std84	Observed	0.268237
Czech Republic	2014	Women	std84	Observed	0.266294
Czech Republic	2015	Women	std84	Observed	0.265155
Czech Republic	2015	Women	std84	Projected	0.265155
Czech Republic	2016	Women	std84	Observed	0.266517
Czech Republic	2016	Women	std84	Projected	0.266517
Czech Republic	2017	Women	std84	Projected	0.262686
Czech Republic	2018	Women	std84	Projected	0.261935
Czech Republic	2019	Women	std84	Projected	0.26089
Czech Republic	2020	Women	std84	Projected	0.259235
Czech Republic	2021	Women	std84	Projected	0.256979
Czech Republic	2022	Women	std84	Projected	0.254336
Czech Republic	2023	Women	std84	Projected	0.251501
Czech Republic	2024	Women	std84	Projected	0.248429
Czech Republic	2025	Women	std84	Projected	0.245294
Czech Republic	2026	Women	std84	Projected	0.241927
Czech Republic	2027	Women	std84	Projected	0.238554
Czech Republic	2028	Women	std84	Projected	0.235062
Czech Republic	2029	Women	std84	Projected	0.231496
Czech Republic	2030	Women	std84	Projected	0.227847
Czech Republic	2031	Women	std84	Projected	0.224012
Czech Republic	2032	Women	std84	Projected	0.220173
Czech Republic	2033	Women	std84	Projected	0.216383
Czech Republic	2034	Women	std84	Projected	0.212635
Czech Republic	2035	Women	std84	Projected	0.208944
Czech Republic	2036	Women	std84	Projected	0.205387
Czech Republic	2037	Women	std84	Projected	0.202038
Czech Republic	2038	Women	std84	Projected	0.19884
Czech Republic	2039	Women	std84	Projected	0.195904
Czech Republic	2040	Women	std84	Projected	0.193168
Czech Republic	2041	Women	std84	Projected	0.190662
Czech Republic	2042	Women	std84	Projected	0.188377
Czech Republic	2043	Women	std84	Projected	0.186291
Czech Republic	2044	Women	std84	Projected	0.184393
Czech Republic	2045	Women	std84	Projected	0.182686
Czech Republic	2046	Women	std84	Projected	0.181146
Czech Republic	2047	Women	std84	Projected	0.179745
Czech Republic	2048	Women	std84	Projected	0.178472
Czech Republic	2049	Women	std84	Projected	0.177324
Czech Republic	2050	Women	std84	Projected	0.176307
Czech Republic	2051	Women	std84	Projected	0.175353
Czech Republic	2052	Women	std84	Projected	0.174472
Czech Republic	2053	Women	std84	Projected	0.173673
Czech Republic	2054	Women	std84	Projected	0.172902
Czech Republic	2055	Women	std84	Projected	0.172164
Czech Republic	2056	Women	std84	Projected	0.171428
Czech Republic	2057	Women	std84	Projected	0.17071
Czech Republic	2058	Women	std84	Projected	0.169973
Czech Republic	2059	Women	std84	Projected	0.169201
Czech Republic	2060	Women	std84	Projected	0.168418
Czech Republic	2061	Women	std84	Projected	0.167605
Czech Republic	2062	Women	std84	Projected	0.166793
Czech Republic	2063	Women	std84	Projected	0.16594
Czech Republic	2064	Women	std84	Projected	0.165055
Czech Republic	2065	Women	std84	Projected	0.164151
Denmark	1990	Women	std84	Observed	0.293926
Denmark	1991	Women	std84	Observed	0.306695
Denmark	1992	Women	std84	Observed	0.30078
Denmark	1993	Women	std84	Observed	0.316337
Denmark	1994	Women	std84	Observed	0.333941
Denmark	1995	Women	std84	Observed	0.33858
Denmark	1996	Women	std84	Observed	0.332877
Denmark	1997	Women	std84	Observed	0.354127
Denmark	1998	Women	std84	Observed	0.34438
Denmark	1999	Women	std84	Observed	0.354926
Denmark	2000	Women	std84	Observed	0.354603
Denmark	2001	Women	std84	Observed	0.360066
Denmark	2002	Women	std84	Observed	0.356899
Denmark	2003	Women	std84	Observed	0.365454
Denmark	2004	Women	std84	Observed	0.37527
Denmark	2005	Women	std84	Observed	0.38257
Denmark	2006	Women	std84	Observed	0.383199
Denmark	2007	Women	std84	Observed	0.363969
Denmark	2008	Women	std84	Observed	0.380038
Denmark	2009	Women	std84	Observed	0.377412
Denmark	2010	Women	std84	Observed	0.379458
Denmark	2011	Women	std84	Observed	0.373869
Denmark	2012	Women	std84	Observed	0.372771
Denmark	2013	Women	std84	Observed	0.368697
Denmark	2014	Women	std84	Observed	0.36576
Denmark	2015	Women	std84	Observed	0.365856
Denmark	2015	Women	std84	Projected	0.365856
Denmark	2016	Women	std84	Projected	0.361244
Denmark	2017	Women	std84	Projected	0.355982
Denmark	2018	Women	std84	Projected	0.35072
Denmark	2019	Women	std84	Projected	0.344866
Denmark	2020	Women	std84	Projected	0.338475
Denmark	2021	Women	std84	Projected	0.33161
Denmark	2022	Women	std84	Projected	0.324114
Denmark	2023	Women	std84	Projected	0.316054
Denmark	2024	Women	std84	Projected	0.308013
Denmark	2025	Women	std84	Projected	0.299553
Denmark	2026	Women	std84	Projected	0.290873
Denmark	2027	Women	std84	Projected	0.282253
Denmark	2028	Women	std84	Projected	0.273129
Denmark	2029	Women	std84	Projected	0.26418
Denmark	2030	Women	std84	Projected	0.255357
Denmark	2031	Women	std84	Projected	0.246298
Denmark	2032	Women	std84	Projected	0.237767
Denmark	2033	Women	std84	Projected	0.229322
Denmark	2034	Women	std84	Projected	0.221502
Denmark	2035	Women	std84	Projected	0.213676
Denmark	2036	Women	std84	Projected	0.206704
Denmark	2037	Women	std84	Projected	0.200098
Denmark	2038	Women	std84	Projected	0.193817
Denmark	2039	Women	std84	Projected	0.188085
Denmark	2040	Women	std84	Projected	0.182939
Denmark	2041	Women	std84	Projected	0.178287
Denmark	2042	Women	std84	Projected	0.17416
Denmark	2043	Women	std84	Projected	0.170473
Denmark	2044	Women	std84	Projected	0.167072
Denmark	2045	Women	std84	Projected	0.164104
Denmark	2046	Women	std84	Projected	0.161427
Denmark	2047	Women	std84	Projected	0.159038
Denmark	2048	Women	std84	Projected	0.156932
Denmark	2049	Women	std84	Projected	0.154999
Denmark	2050	Women	std84	Projected	0.153288
Denmark	2051	Women	std84	Projected	0.151771
Denmark	2052	Women	std84	Projected	0.150369
Denmark	2053	Women	std84	Projected	0.149089
Denmark	2054	Women	std84	Projected	0.147889
Denmark	2055	Women	std84	Projected	0.146735
Denmark	2056	Women	std84	Projected	0.145605
Denmark	2057	Women	std84	Projected	0.144504
Denmark	2058	Women	std84	Projected	0.143415
Denmark	2059	Women	std84	Projected	0.142332
Denmark	2060	Women	std84	Projected	0.141255
Denmark	2061	Women	std84	Projected	0.140169
Denmark	2062	Women	std84	Projected	0.139086
Denmark	2063	Women	std84	Projected	0.138009
Denmark	2064	Women	std84	Projected	0.136925
Denmark	2065	Women	std84	Projected	0.135845
Finland	1990	Women	std84	Observed	0.142944
Finland	1991	Women	std84	Observed	0.142994
Finland	1992	Women	std84	Observed	0.152474
Finland	1993	Women	std84	Observed	0.148899
Finland	1994	Women	std84	Observed	0.156746
Finland	1995	Women	std84	Observed	0.155035
Finland	1996	Women	std84	Observed	0.164161
Finland	1997	Women	std84	Observed	0.163812
Finland	1998	Women	std84	Observed	0.178847
Finland	1999	Women	std84	Observed	0.174794
Finland	2000	Women	std84	Observed	0.181192
Finland	2001	Women	std84	Observed	0.189175
Finland	2002	Women	std84	Observed	0.187544
Finland	2003	Women	std84	Observed	0.198773
Finland	2004	Women	std84	Observed	0.192825
Finland	2005	Women	std84	Observed	0.201171
Finland	2006	Women	std84	Observed	0.204525
Finland	2007	Women	std84	Observed	0.207845
Finland	2008	Women	std84	Observed	0.215912
Finland	2009	Women	std84	Observed	0.21453
Finland	2010	Women	std84	Observed	0.226855
Finland	2011	Women	std84	Observed	0.226244
Finland	2012	Women	std84	Observed	0.236043
Finland	2013	Women	std84	Observed	0.234573
Finland	2014	Women	std84	Observed	0.23853
Finland	2015	Women	std84	Observed	0.239654
Finland	2015	Women	std84	Projected	0.239654
Finland	2016	Women	std84	Projected	0.236752
Finland	2017	Women	std84	Projected	0.238509
Finland	2018	Women	std84	Projected	0.239764
Finland	2019	Women	std84	Projected	0.240747
Finland	2020	Women	std84	Projected	0.24121
Finland	2021	Women	std84	Projected	0.24185
Finland	2022	Women	std84	Projected	0.242423
Finland	2023	Women	std84	Projected	0.242812
Finland	2024	Women	std84	Projected	0.243227
Finland	2025	Women	std84	Projected	0.243175
Finland	2026	Women	std84	Projected	0.243317
Finland	2027	Women	std84	Projected	0.243069
Finland	2028	Women	std84	Projected	0.243266
Finland	2029	Women	std84	Projected	0.242966
Finland	2030	Women	std84	Projected	0.243018
Finland	2031	Women	std84	Projected	0.24247
Finland	2032	Women	std84	Projected	0.24137
Finland	2033	Women	std84	Projected	0.240796
Finland	2034	Women	std84	Projected	0.239661
Finland	2035	Women	std84	Projected	0.238336
Finland	2036	Women	std84	Projected	0.236801
Finland	2037	Women	std84	Projected	0.234755
Finland	2038	Women	std84	Projected	0.232633
Finland	2039	Women	std84	Projected	0.230252
Finland	2040	Women	std84	Projected	0.227315
Finland	2041	Women	std84	Projected	0.224829
Finland	2042	Women	std84	Projected	0.221722
Finland	2043	Women	std84	Projected	0.219243
Finland	2044	Women	std84	Projected	0.215959
Finland	2045	Women	std84	Projected	0.21249
Finland	2046	Women	std84	Projected	0.208969
Finland	2047	Women	std84	Projected	0.205772
Finland	2048	Women	std84	Projected	0.202492
Finland	2049	Women	std84	Projected	0.1994
Finland	2050	Women	std84	Projected	0.196726
Finland	2051	Women	std84	Projected	0.193902
Finland	2052	Women	std84	Projected	0.191082
Finland	2053	Women	std84	Projected	0.188081
Finland	2054	Women	std84	Projected	0.185471
Finland	2055	Women	std84	Projected	0.182848
Finland	2056	Women	std84	Projected	0.180232
Finland	2057	Women	std84	Projected	0.177578
Finland	2058	Women	std84	Projected	0.175037
Finland	2059	Women	std84	Projected	0.172614
Finland	2060	Women	std84	Projected	0.170157
Finland	2061	Women	std84	Projected	0.167779
Finland	2062	Women	std84	Projected	0.165368
Finland	2063	Women	std84	Projected	0.163148
Finland	2064	Women	std84	Projected	0.160841
Finland	2065	Women	std84	Projected	0.158547
France	1990	Women	std84	Observed	0.148631
France	1991	Women	std84	Observed	0.151614
France	1992	Women	std84	Observed	0.151208
France	1993	Women	std84	Observed	0.15477
France	1994	Women	std84	Observed	0.155035
France	1995	Women	std84	Observed	0.159791
France	1996	Women	std84	Observed	0.162551
France	1997	Women	std84	Observed	0.161612
France	1998	Women	std84	Observed	0.169968
France	1999	Women	std84	Observed	0.172242
France	2000	Women	std84	Observed	0.169632
France	2001	Women	std84	Observed	0.172337
France	2002	Women	std84	Observed	0.179629
France	2003	Women	std84	Observed	0.182243
France	2004	Women	std84	Observed	0.186461
France	2005	Women	std84	Observed	0.193525
France	2006	Women	std84	Observed	0.196312
France	2007	Women	std84	Observed	0.198043
France	2008	Women	std84	Observed	0.202273
France	2009	Women	std84	Observed	0.208018
France	2010	Women	std84	Observed	0.207834
France	2011	Women	std84	Observed	0.211489
France	2012	Women	std84	Observed	0.216564
France	2013	Women	std84	Observed	0.213222
France	2014	Women	std84	Observed	0.224431
France	2015	Women	std84	Observed	0.225165
France	2015	Women	std84	Projected	0.225165
France	2016	Women	std84	Projected	0.22497
France	2017	Women	std84	Projected	0.226345
France	2018	Women	std84	Projected	0.22614
France	2019	Women	std84	Projected	0.225261
France	2020	Women	std84	Projected	0.223932
France	2021	Women	std84	Projected	0.222571
France	2022	Women	std84	Projected	0.221346
France	2023	Women	std84	Projected	0.219327
France	2024	Women	std84	Projected	0.217431
France	2025	Women	std84	Projected	0.215191
France	2026	Women	std84	Projected	0.212598
France	2027	Women	std84	Projected	0.209771
France	2028	Women	std84	Projected	0.207011
France	2029	Women	std84	Projected	0.204284
France	2030	Women	std84	Projected	0.201398
France	2031	Women	std84	Projected	0.198563
France	2032	Women	std84	Projected	0.195959
France	2033	Women	std84	Projected	0.193685
France	2034	Women	std84	Projected	0.191327
France	2035	Women	std84	Projected	0.189374
France	2036	Women	std84	Projected	0.187612
France	2037	Women	std84	Projected	0.185946
France	2038	Women	std84	Projected	0.184451
France	2039	Women	std84	Projected	0.183096
France	2040	Women	std84	Projected	0.181823
France	2041	Women	std84	Projected	0.180611
France	2042	Women	std84	Projected	0.179484
France	2043	Women	std84	Projected	0.178358
France	2044	Women	std84	Projected	0.177247
France	2045	Women	std84	Projected	0.176129
France	2046	Women	std84	Projected	0.175004
France	2047	Women	std84	Projected	0.173863
France	2048	Women	std84	Projected	0.172685
France	2049	Women	std84	Projected	0.171482
France	2050	Women	std84	Projected	0.170251
France	2051	Women	std84	Projected	0.168991
France	2052	Women	std84	Projected	0.167708
France	2053	Women	std84	Projected	0.166411
France	2054	Women	std84	Projected	0.16508
France	2055	Women	std84	Projected	0.163737
France	2056	Women	std84	Projected	0.162377
France	2057	Women	std84	Projected	0.161009
France	2058	Women	std84	Projected	0.159626
France	2059	Women	std84	Projected	0.15824
France	2060	Women	std84	Projected	0.156869
France	2061	Women	std84	Projected	0.155486
France	2062	Women	std84	Projected	0.154115
France	2063	Women	std84	Projected	0.152748
France	2064	Women	std84	Projected	0.151408
France	2065	Women	std84	Projected	0.150072
Germany	1990	Women	std84	Observed	0.174081
Germany	1991	Women	std84	Observed	0.180366
Germany	1992	Women	std84	Observed	0.183137
Germany	1993	Women	std84	Observed	0.188838
Germany	1994	Women	std84	Observed	0.192603
Germany	1995	Women	std84	Observed	0.195218
Germany	1996	Women	std84	Observed	0.197134
Germany	1997	Women	std84	Observed	0.200386
Germany	1998	Women	std84	Observed	0.206423
Germany	1999	Women	std84	Observed	0.208236
Germany	2000	Women	std84	Observed	0.212036
Germany	2001	Women	std84	Observed	0.213712
Germany	2002	Women	std84	Observed	0.21691
Germany	2003	Women	std84	Observed	0.220139
Germany	2004	Women	std84	Observed	0.224552
Germany	2005	Women	std84	Observed	0.230284
Germany	2006	Women	std84	Observed	0.233301
Germany	2007	Women	std84	Observed	0.237627
Germany	2008	Women	std84	Observed	0.241668
Germany	2009	Women	std84	Observed	0.244795
Germany	2010	Women	std84	Observed	0.249707
Germany	2011	Women	std84	Observed	0.256014
Germany	2012	Women	std84	Observed	0.259767
Germany	2013	Women	std84	Observed	0.264105
Germany	2014	Women	std84	Observed	0.266925
Germany	2015	Women	std84	Observed	0.271325
Germany	2015	Women	std84	Projected	0.271325
Germany	2016	Women	std84	Projected	0.267551
Germany	2017	Women	std84	Projected	0.269773
Germany	2018	Women	std84	Projected	0.271609
Germany	2019	Women	std84	Projected	0.27325
Germany	2020	Women	std84	Projected	0.27471
Germany	2021	Women	std84	Projected	0.275947
Germany	2022	Women	std84	Projected	0.277079
Germany	2023	Women	std84	Projected	0.277933
Germany	2024	Women	std84	Projected	0.278545
Germany	2025	Women	std84	Projected	0.278836
Germany	2026	Women	std84	Projected	0.278747
Germany	2027	Women	std84	Projected	0.278454
Germany	2028	Women	std84	Projected	0.278047
Germany	2029	Women	std84	Projected	0.276975
Germany	2030	Women	std84	Projected	0.275648
Germany	2031	Women	std84	Projected	0.274178
Germany	2032	Women	std84	Projected	0.272054
Germany	2033	Women	std84	Projected	0.269662
Germany	2034	Women	std84	Projected	0.267213
Germany	2035	Women	std84	Projected	0.264288
Germany	2036	Women	std84	Projected	0.261395
Germany	2037	Women	std84	Projected	0.258026
Germany	2038	Women	std84	Projected	0.254068
Germany	2039	Women	std84	Projected	0.250005
Germany	2040	Women	std84	Projected	0.245446
Germany	2041	Women	std84	Projected	0.240775
Germany	2042	Women	std84	Projected	0.23619
Germany	2043	Women	std84	Projected	0.231643
Germany	2044	Women	std84	Projected	0.227246
Germany	2045	Women	std84	Projected	0.22297
Germany	2046	Women	std84	Projected	0.218952
Germany	2047	Women	std84	Projected	0.215214
Germany	2048	Women	std84	Projected	0.211768
Germany	2049	Women	std84	Projected	0.208624
Germany	2050	Women	std84	Projected	0.205714
Germany	2051	Women	std84	Projected	0.203114
Germany	2052	Women	std84	Projected	0.200777
Germany	2053	Women	std84	Projected	0.198694
Germany	2054	Women	std84	Projected	0.196857
Germany	2055	Women	std84	Projected	0.195228
Germany	2056	Women	std84	Projected	0.193784
Germany	2057	Women	std84	Projected	0.192506
Germany	2058	Women	std84	Projected	0.191221
Germany	2059	Women	std84	Projected	0.189928
Germany	2060	Women	std84	Projected	0.188613
Germany	2061	Women	std84	Projected	0.187287
Germany	2062	Women	std84	Projected	0.18593
Germany	2063	Women	std84	Projected	0.184561
Germany	2064	Women	std84	Projected	0.183169
Germany	2065	Women	std84	Projected	0.181769
Greece	1990	Women	std84	Observed	0.151023
Greece	1991	Women	std84	Observed	0.150255
Greece	1992	Women	std84	Observed	0.151868
Greece	1993	Women	std84	Observed	0.154245
Greece	1994	Women	std84	Observed	0.156322
Greece	1995	Women	std84	Observed	0.155473
Greece	1996	Women	std84	Observed	0.155087
Greece	1997	Women	std84	Observed	0.15427
Greece	1998	Women	std84	Observed	0.160477
Greece	1999	Women	std84	Observed	0.154559
Greece	2000	Women	std84	Observed	0.161293
Greece	2001	Women	std84	Observed	0.157681
Greece	2002	Women	std84	Observed	0.160764
Greece	2003	Women	std84	Observed	0.163141
Greece	2004	Women	std84	Observed	0.165544
Greece	2005	Women	std84	Observed	0.16166
Greece	2006	Women	std84	Observed	0.160915
Greece	2007	Women	std84	Observed	0.168917
Greece	2008	Women	std84	Observed	0.173081
Greece	2009	Women	std84	Observed	0.17631
Greece	2010	Women	std84	Observed	0.179509
Greece	2011	Women	std84	Observed	0.18304
Greece	2012	Women	std84	Observed	0.189017
Greece	2013	Women	std84	Observed	0.192793
Greece	2015	Women	std84	Projected	0.196141
Greece	2016	Women	std84	Projected	0.198776
Greece	2017	Women	std84	Projected	0.201533
Greece	2018	Women	std84	Projected	0.203772
Greece	2019	Women	std84	Projected	0.20561
Greece	2020	Women	std84	Projected	0.207096
Greece	2021	Women	std84	Projected	0.208157
Greece	2022	Women	std84	Projected	0.208774
Greece	2023	Women	std84	Projected	0.208931
Greece	2024	Women	std84	Projected	0.208645
Greece	2025	Women	std84	Projected	0.208033
Greece	2026	Women	std84	Projected	0.207069
Greece	2027	Women	std84	Projected	0.20573
Greece	2028	Women	std84	Projected	0.204105
Greece	2029	Women	std84	Projected	0.202104
Greece	2030	Women	std84	Projected	0.200016
Greece	2031	Women	std84	Projected	0.197743
Greece	2032	Women	std84	Projected	0.195481
Greece	2033	Women	std84	Projected	0.193143
Greece	2034	Women	std84	Projected	0.190847
Greece	2035	Women	std84	Projected	0.188724
Greece	2036	Women	std84	Projected	0.186769
Greece	2037	Women	std84	Projected	0.18503
Greece	2038	Women	std84	Projected	0.183474
Greece	2039	Women	std84	Projected	0.182071
Greece	2040	Women	std84	Projected	0.180847
Greece	2041	Women	std84	Projected	0.179765
Greece	2042	Women	std84	Projected	0.178818
Greece	2043	Women	std84	Projected	0.177976
Greece	2044	Women	std84	Projected	0.177192
Greece	2045	Women	std84	Projected	0.176469
Greece	2046	Women	std84	Projected	0.175766
Greece	2047	Women	std84	Projected	0.175064
Greece	2048	Women	std84	Projected	0.174366
Greece	2049	Women	std84	Projected	0.173648
Greece	2050	Women	std84	Projected	0.172919
Greece	2051	Women	std84	Projected	0.172162
Greece	2052	Women	std84	Projected	0.171368
Greece	2053	Women	std84	Projected	0.170544
Greece	2054	Women	std84	Projected	0.169688
Greece	2055	Women	std84	Projected	0.168801
Greece	2056	Women	std84	Projected	0.167879
Greece	2057	Women	std84	Projected	0.166924
Greece	2058	Women	std84	Projected	0.165939
Greece	2059	Women	std84	Projected	0.164936
Greece	2060	Women	std84	Projected	0.163903
Greece	2061	Women	std84	Projected	0.162853
Greece	2062	Women	std84	Projected	0.161776
Greece	2063	Women	std84	Projected	0.160691
Greece	2064	Women	std84	Projected	0.159586
Greece	2065	Women	std84	Projected	0.158466
Hungary	1990	Women	std84	Observed	0.254921
Hungary	1991	Women	std84	Observed	0.252784
Hungary	1992	Women	std84	Observed	0.262607
Hungary	1993	Women	std84	Observed	0.27426
Hungary	1994	Women	std84	Observed	0.268631
[truncated: 761 more rows]
