# Supplementary material for: Future life expectancy in Europe taking into account the impact of smoking, obesity, and alcohol
Source: eLife. 2021 Jul 6;10:e66590. doi: 10.7554/eLife.66590 (PMC8337079; doi:10.7554/eLife.66590)
Supplement: Figure 2—figure supplement 1—source data 1. [file elife-66590-fig2-figsupp1-data1.xlsx]

## Sheet: data
lifestyle	country	sex	year	e0
all-cause	Austria	women	1955	70.3386
all-cause	Austria	women	1956	70.5266
all-cause	Austria	women	1957	70.4863
all-cause	Austria	women	1958	71.3444
all-cause	Austria	women	1959	71.3705
all-cause	Austria	women	1960	71.8866
all-cause	Austria	women	1961	72.7655
all-cause	Austria	women	1962	72.461
all-cause	Austria	women	1963	72.645
all-cause	Austria	women	1964	73.1908
all-cause	Austria	women	1965	72.9805
all-cause	Austria	women	1966	73.334
all-cause	Austria	women	1967	73.3676
all-cause	Austria	women	1968	73.5174
all-cause	Austria	women	1969	73.2683
all-cause	Austria	women	1970	73.4178
all-cause	Austria	women	1971	73.6649
all-cause	Austria	women	1972	74.0185
all-cause	Austria	women	1973	74.5656
all-cause	Austria	women	1974	74.6192
all-cause	Austria	women	1975	74.6989
all-cause	Austria	women	1976	75.0593
all-cause	Austria	women	1977	75.4414
all-cause	Austria	women	1978	75.6573
all-cause	Austria	women	1979	75.9671
all-cause	Austria	women	1980	76.0406
all-cause	Austria	women	1981	76.38
all-cause	Austria	women	1982	76.5804
all-cause	Austria	women	1983	76.5898
all-cause	Austria	women	1984	77.1848
all-cause	Austria	women	1985	77.3012
all-cause	Austria	women	1986	77.6488
all-cause	Austria	women	1987	78.0312
all-cause	Austria	women	1988	78.5174
all-cause	Austria	women	1989	78.6664
all-cause	Austria	women	1990	78.8693
all-cause	Austria	women	1991	78.9853
all-cause	Austria	women	1992	79.1502
all-cause	Austria	women	1993	79.3468
all-cause	Austria	women	1994	79.641
all-cause	Austria	women	1995	79.9579
all-cause	Austria	women	1996	80.0846
all-cause	Austria	women	1997	80.5363
all-cause	Austria	women	1998	80.8157
all-cause	Austria	women	1999	80.8363
all-cause	Austria	women	2000	81.1024
all-cause	Austria	women	2001	81.5663
all-cause	Austria	women	2002	81.6589
all-cause	Austria	women	2003	81.5438
all-cause	Austria	women	2004	82.1057
all-cause	Austria	women	2005	82.2125
all-cause	Austria	women	2006	82.6429
all-cause	Austria	women	2007	82.8375
all-cause	Austria	women	2008	82.9571
all-cause	Austria	women	2009	82.853
all-cause	Austria	women	2010	83.1309
all-cause	Austria	women	2011	83.4352
all-cause	Austria	women	2012	83.2952
all-cause	Austria	women	2013	83.5674
all-cause	Austria	women	2014	83.7377
non-smoking	Austria	women	1955	70.5053
non-smoking	Austria	women	1956	70.8608
non-smoking	Austria	women	1957	70.8048
non-smoking	Austria	women	1958	71.6899
non-smoking	Austria	women	1959	71.6987
non-smoking	Austria	women	1960	72.1043
non-smoking	Austria	women	1961	73.0241
non-smoking	Austria	women	1962	72.7701
non-smoking	Austria	women	1963	72.9489
non-smoking	Austria	women	1964	73.473
non-smoking	Austria	women	1965	73.2596
non-smoking	Austria	women	1966	73.6831
non-smoking	Austria	women	1967	73.6923
non-smoking	Austria	women	1968	73.8793
non-smoking	Austria	women	1969	73.6115
non-smoking	Austria	women	1970	73.7019
non-smoking	Austria	women	1971	74.0552
non-smoking	Austria	women	1972	74.3757
non-smoking	Austria	women	1973	74.9468
non-smoking	Austria	women	1974	75.0376
non-smoking	Austria	women	1975	75.1227
non-smoking	Austria	women	1976	75.4406
non-smoking	Austria	women	1977	75.8534
non-smoking	Austria	women	1978	76.1229
non-smoking	Austria	women	1979	76.4317
non-smoking	Austria	women	1980	76.514
non-smoking	Austria	women	1981	76.8748
non-smoking	Austria	women	1982	77.1403
non-smoking	Austria	women	1983	77.1136
non-smoking	Austria	women	1984	77.835
non-smoking	Austria	women	1985	77.8467
non-smoking	Austria	women	1986	78.183
non-smoking	Austria	women	1987	78.6648
non-smoking	Austria	women	1988	79.1893
non-smoking	Austria	women	1989	79.2475
non-smoking	Austria	women	1990	79.4748
non-smoking	Austria	women	1991	79.6943
non-smoking	Austria	women	1992	79.827
non-smoking	Austria	women	1993	80.0362
non-smoking	Austria	women	1994	80.3922
non-smoking	Austria	women	1995	80.6275
non-smoking	Austria	women	1996	80.8315
non-smoking	Austria	women	1997	81.324
non-smoking	Austria	women	1998	81.5747
non-smoking	Austria	women	1999	81.6092
non-smoking	Austria	women	2000	81.8937
non-smoking	Austria	women	2001	82.2922
non-smoking	Austria	women	2002	82.464
non-smoking	Austria	women	2003	82.3065
non-smoking	Austria	women	2004	82.9167
non-smoking	Austria	women	2005	82.9726
non-smoking	Austria	women	2006	83.4174
non-smoking	Austria	women	2007	83.7327
non-smoking	Austria	women	2008	83.8437
non-smoking	Austria	women	2009	83.6915
non-smoking	Austria	women	2010	84.0688
non-smoking	Austria	women	2011	84.3714
non-smoking	Austria	women	2012	84.275
non-smoking	Austria	women	2013	84.4898
non-smoking	Austria	women	2014	84.7831
non-alcohol	Austria	women	1990	79.3038
non-alcohol	Austria	women	1991	79.4152
non-alcohol	Austria	women	1992	79.5788
non-alcohol	Austria	women	1993	79.7834
non-alcohol	Austria	women	1994	80.0699
non-alcohol	Austria	women	1995	80.3776
non-alcohol	Austria	women	1996	80.497
non-alcohol	Austria	women	1997	80.9272
non-alcohol	Austria	women	1998	81.2054
non-alcohol	Austria	women	1999	81.228
non-alcohol	Austria	women	2000	81.4911
non-alcohol	Austria	women	2001	81.947
non-alcohol	Austria	women	2002	82.0352
non-alcohol	Austria	women	2003	81.9215
non-alcohol	Austria	women	2004	82.4708
non-alcohol	Austria	women	2005	82.5733
non-alcohol	Austria	women	2006	82.9879
non-alcohol	Austria	women	2007	83.1808
non-alcohol	Austria	women	2008	83.2914
non-alcohol	Austria	women	2009	83.1838
non-alcohol	Austria	women	2010	83.4572
non-alcohol	Austria	women	2011	83.7649
non-alcohol	Austria	women	2012	83.6068
non-alcohol	Austria	women	2013	83.8743
non-alcohol	Austria	women	2014	84.0499
non-obesity	Austria	women	1975	75.1333
non-obesity	Austria	women	1976	75.4969
non-obesity	Austria	women	1977	75.8925
non-obesity	Austria	women	1978	76.1083
non-obesity	Austria	women	1979	76.4264
non-obesity	Austria	women	1980	76.5086
non-obesity	Austria	women	1981	76.8544
non-obesity	Austria	women	1982	77.0658
non-obesity	Austria	women	1983	77.0812
non-obesity	Austria	women	1984	77.6843
non-obesity	Austria	women	1985	77.8056
non-obesity	Austria	women	1986	78.1607
non-obesity	Austria	women	1987	78.5476
non-obesity	Austria	women	1988	79.0419
non-obesity	Austria	women	1989	79.1987
non-obesity	Austria	women	1990	79.413
non-obesity	Austria	women	1991	79.5401
non-obesity	Austria	women	1992	79.7147
non-obesity	Austria	women	1993	79.9222
non-obesity	Austria	women	1994	80.2255
non-obesity	Austria	women	1995	80.5482
non-obesity	Austria	women	1996	80.684
non-obesity	Austria	women	1997	81.1354
non-obesity	Austria	women	1998	81.4188
non-obesity	Austria	women	1999	81.4499
non-obesity	Austria	women	2000	81.7233
non-obesity	Austria	women	2001	82.192
non-obesity	Austria	women	2002	82.2895
non-obesity	Austria	women	2003	82.1823
non-obesity	Austria	women	2004	82.7473
non-obesity	Austria	women	2005	82.8624
non-obesity	Austria	women	2006	83.2933
non-obesity	Austria	women	2007	83.4977
non-obesity	Austria	women	2008	83.6201
non-obesity	Austria	women	2009	83.5344
non-obesity	Austria	women	2010	83.8165
non-obesity	Austria	women	2011	84.1332
non-obesity	Austria	women	2012	83.9967
non-obesity	Austria	women	2013	84.276
non-obesity	Austria	women	2014	84.4621
non-lifestyle combined	Austria	women	1990	80.403
non-lifestyle combined	Austria	women	1991	80.6209
non-lifestyle combined	Austria	women	1992	80.7656
non-lifestyle combined	Austria	women	1993	80.9846
non-lifestyle combined	Austria	women	1994	81.3364
non-lifestyle combined	Austria	women	1995	81.5749
non-lifestyle combined	Austria	women	1996	81.7683
non-lifestyle combined	Austria	women	1997	82.2393
non-lifestyle combined	Austria	women	1998	82.4898
non-lifestyle combined	Austria	women	1999	82.5369
non-lifestyle combined	Austria	women	2000	82.8167
non-lifestyle combined	Austria	women	2001	83.2195
non-lifestyle combined	Austria	women	2002	83.3804
non-lifestyle combined	Austria	women	2003	83.2337
non-lifestyle combined	Austria	women	2004	83.8303
non-lifestyle combined	Austria	women	2005	83.8947
non-lifestyle combined	Austria	women	2006	84.3257
non-lifestyle combined	Austria	women	2007	84.633
non-lifestyle combined	Austria	women	2008	84.7401
non-lifestyle combined	Austria	women	2009	84.6015
non-lifestyle combined	Austria	women	2010	84.9775
non-lifestyle combined	Austria	women	2011	85.2898
non-lifestyle combined	Austria	women	2012	85.1777
non-lifestyle combined	Austria	women	2013	85.4021
non-lifestyle combined	Austria	women	2014	85.7015
all-cause	Belgium	women	1954	71.1123
all-cause	Belgium	women	1955	71.22
all-cause	Belgium	women	1956	71.6001
all-cause	Belgium	women	1957	71.8898
all-cause	Belgium	women	1958	72.5698
all-cause	Belgium	women	1959	73.0654
all-cause	Belgium	women	1960	72.6299
all-cause	Belgium	women	1961	73.5196
all-cause	Belgium	women	1962	73.1225
all-cause	Belgium	women	1963	73.0818
all-cause	Belgium	women	1964	73.7853
all-cause	Belgium	women	1965	73.6334
all-cause	Belgium	women	1966	73.6634
all-cause	Belgium	women	1967	74.0787
all-cause	Belgium	women	1968	73.7753
all-cause	Belgium	women	1969	73.9716
all-cause	Belgium	women	1970	74.1402
all-cause	Belgium	women	1971	74.3739
all-cause	Belgium	women	1972	74.7114
all-cause	Belgium	women	1973	74.9201
all-cause	Belgium	women	1974	75.2258
all-cause	Belgium	women	1975	75.2056
all-cause	Belgium	women	1976	75.4144
all-cause	Belgium	women	1977	76.0643
all-cause	Belgium	women	1978	76.0648
all-cause	Belgium	women	1979	76.5198
all-cause	Belgium	women	1980	76.6571
all-cause	Belgium	women	1981	77.0381
all-cause	Belgium	women	1982	77.1665
all-cause	Belgium	women	1983	77.1459
all-cause	Belgium	women	1984	77.7881
all-cause	Belgium	women	1985	77.8786
all-cause	Belgium	women	1986	78
all-cause	Belgium	women	1987	78.6236
all-cause	Belgium	women	1988	78.9146
all-cause	Belgium	women	1989	78.9253
all-cause	Belgium	women	1990	79.3394
all-cause	Belgium	women	1991	79.4736
all-cause	Belgium	women	1992	79.6696
all-cause	Belgium	women	1993	79.7415
all-cause	Belgium	women	1994	79.9993
all-cause	Belgium	women	1995	80.1931
all-cause	Belgium	women	1996	80.4755
all-cause	Belgium	women	1997	80.5566
all-cause	Belgium	women	1998	80.5691
all-cause	Belgium	women	1999	80.8749
all-cause	Belgium	women	2000	80.9088
all-cause	Belgium	women	2001	81.1717
all-cause	Belgium	women	2002	81.197
all-cause	Belgium	women	2003	81.2093
all-cause	Belgium	women	2004	81.869
all-cause	Belgium	women	2005	81.8651
all-cause	Belgium	women	2006	82.1546
all-cause	Belgium	women	2007	82.2191
all-cause	Belgium	women	2008	82.3171
all-cause	Belgium	women	2009	82.4457
all-cause	Belgium	women	2010	82.6542
all-cause	Belgium	women	2011	82.8825
all-cause	Belgium	women	2012	82.8437
all-cause	Belgium	women	2013	82.9401
all-cause	Belgium	women	2014	83.5281
non-smoking	Belgium	women	1954	71.1555
non-smoking	Belgium	women	1955	71.2639
non-smoking	Belgium	women	1956	71.6097
non-smoking	Belgium	women	1957	71.9692
non-smoking	Belgium	women	1958	72.6234
non-smoking	Belgium	women	1959	73.0913
non-smoking	Belgium	women	1960	72.6687
non-smoking	Belgium	women	1961	73.6042
non-smoking	Belgium	women	1962	73.2063
non-smoking	Belgium	women	1963	73.1349
non-smoking	Belgium	women	1964	73.8787
non-smoking	Belgium	women	1965	73.7156
non-smoking	Belgium	women	1966	73.721
non-smoking	Belgium	women	1967	74.2271
non-smoking	Belgium	women	1968	73.8919
non-smoking	Belgium	women	1969	74.0852
non-smoking	Belgium	women	1970	74.2203
non-smoking	Belgium	women	1971	74.4806
non-smoking	Belgium	women	1972	74.8736
non-smoking	Belgium	women	1973	75.1542
non-smoking	Belgium	women	1974	75.4264
non-smoking	Belgium	women	1975	75.4502
non-smoking	Belgium	women	1976	75.643
non-smoking	Belgium	women	1977	76.3562
non-smoking	Belgium	women	1978	76.3158
non-smoking	Belgium	women	1979	76.7801
non-smoking	Belgium	women	1980	76.9426
non-smoking	Belgium	women	1981	77.3926
non-smoking	Belgium	women	1982	77.4868
non-smoking	Belgium	women	1983	77.4755
non-smoking	Belgium	women	1984	78.1212
non-smoking	Belgium	women	1985	78.3008
non-smoking	Belgium	women	1986	78.4717
non-smoking	Belgium	women	1987	79.0437
non-smoking	Belgium	women	1988	79.3427
non-smoking	Belgium	women	1989	79.3835
non-smoking	Belgium	women	1990	79.8312
non-smoking	Belgium	women	1991	80.0152
non-smoking	Belgium	women	1992	80.2824
non-smoking	Belgium	women	1993	80.3279
non-smoking	Belgium	women	1994	80.6365
non-smoking	Belgium	women	1995	80.8355
non-smoking	Belgium	women	1996	81.1048
non-smoking	Belgium	women	1997	81.2788
non-smoking	Belgium	women	1998	81.2387
non-smoking	Belgium	women	1999	81.5161
non-smoking	Belgium	women	2000	81.6255
non-smoking	Belgium	women	2001	81.8439
non-smoking	Belgium	women	2002	81.9084
non-smoking	Belgium	women	2003	81.9768
non-smoking	Belgium	women	2004	82.6594
non-smoking	Belgium	women	2005	82.7318
non-smoking	Belgium	women	2006	83.0577
non-smoking	Belgium	women	2007	83.1525
non-smoking	Belgium	women	2008	83.3115
non-smoking	Belgium	women	2009	83.417
non-smoking	Belgium	women	2010	83.7449
non-smoking	Belgium	women	2011	84.0199
non-smoking	Belgium	women	2012	83.8684
non-smoking	Belgium	women	2013	84.0778
non-smoking	Belgium	women	2014	84.6667
non-alcohol	Belgium	women	1990	79.7069
non-alcohol	Belgium	women	1991	79.8339
non-alcohol	Belgium	women	1992	80.0396
non-alcohol	Belgium	women	1993	80.1035
non-alcohol	Belgium	women	1994	80.3732
non-alcohol	Belgium	women	1995	80.5625
non-alcohol	Belgium	women	1996	80.8366
non-alcohol	Belgium	women	1997	80.9123
non-alcohol	Belgium	women	1998	80.9186
non-alcohol	Belgium	women	1999	81.2098
non-alcohol	Belgium	women	2000	81.2459
non-alcohol	Belgium	women	2001	81.5128
non-alcohol	Belgium	women	2002	81.5489
non-alcohol	Belgium	women	2003	81.5707
non-alcohol	Belgium	women	2004	82.2453
non-alcohol	Belgium	women	2005	82.2501
non-alcohol	Belgium	women	2006	82.5425
non-alcohol	Belgium	women	2007	82.624
non-alcohol	Belgium	women	2008	82.7193
non-alcohol	Belgium	women	2009	82.8514
non-alcohol	Belgium	women	2010	83.061
non-alcohol	Belgium	women	2011	83.2919
non-alcohol	Belgium	women	2012	83.2375
non-alcohol	Belgium	women	2013	83.3369
non-alcohol	Belgium	women	2014	83.9145
non-obesity	Belgium	women	1975	75.9323
non-obesity	Belgium	women	1976	76.1452
non-obesity	Belgium	women	1977	76.8145
non-obesity	Belgium	women	1978	76.814
non-obesity	Belgium	women	1979	77.2772
non-obesity	Belgium	women	1980	77.42
non-obesity	Belgium	women	1981	77.8093
non-obesity	Belgium	women	1982	77.9464
non-obesity	Belgium	women	1983	77.9292
non-obesity	Belgium	women	1984	78.5759
non-obesity	Belgium	women	1985	78.669
non-obesity	Belgium	women	1986	78.8032
non-obesity	Belgium	women	1987	79.4317
non-obesity	Belgium	women	1988	79.731
non-obesity	Belgium	women	1989	79.7405
non-obesity	Belgium	women	1990	80.1619
non-obesity	Belgium	women	1991	80.3032
non-obesity	Belgium	women	1992	80.51
non-obesity	Belgium	women	1993	80.5771
non-obesity	Belgium	women	1994	80.8566
non-obesity	Belgium	women	1995	81.0603
non-obesity	Belgium	women	1996	81.339
non-obesity	Belgium	women	1997	81.4298
non-obesity	Belgium	women	1998	81.4574
non-obesity	Belgium	women	1999	81.753
non-obesity	Belgium	women	2000	81.7978
non-obesity	Belgium	women	2001	82.0662
non-obesity	Belgium	women	2002	82.0947
non-obesity	Belgium	women	2003	82.1075
non-obesity	Belgium	women	2004	82.7707
non-obesity	Belgium	women	2005	82.7742
non-obesity	Belgium	women	2006	83.0668
non-obesity	Belgium	women	2007	83.1489
non-obesity	Belgium	women	2008	83.2469
non-obesity	Belgium	women	2009	83.3883
non-obesity	Belgium	women	2010	83.5996
non-obesity	Belgium	women	2011	83.8355
non-obesity	Belgium	women	2012	83.7861
non-obesity	Belgium	women	2013	83.896
non-obesity	Belgium	women	2014	84.4807
non-lifestyle combined	Belgium	women	1990	80.9544
non-lifestyle combined	Belgium	women	1991	81.1385
non-lifestyle combined	Belgium	women	1992	81.4254
non-lifestyle combined	Belgium	women	1993	81.4555
non-lifestyle combined	Belgium	women	1994	81.7867
non-lifestyle combined	Belgium	women	1995	81.9927
non-lifestyle combined	Belgium	women	1996	82.2541
non-lifestyle combined	Belgium	women	1997	82.4265
non-lifestyle combined	Belgium	women	1998	82.3948
non-lifestyle combined	Belgium	women	1999	82.6485
non-lifestyle combined	Belgium	women	2000	82.7659
non-lifestyle combined	Belgium	women	2001	82.9884
non-lifestyle combined	Belgium	women	2002	83.0642
non-lifestyle combined	Belgium	women	2003	83.1339
non-lifestyle combined	Belgium	women	2004	83.8288
non-lifestyle combined	Belgium	women	2005	83.901
non-lifestyle combined	Belgium	women	2006	84.2323
non-lifestyle combined	Belgium	women	2007	84.357
non-lifestyle combined	Belgium	women	2008	84.5056
non-lifestyle combined	Belgium	women	2009	84.6292
non-lifestyle combined	Belgium	women	2010	84.952
non-lifestyle combined	Belgium	women	2011	85.2271
non-lifestyle combined	Belgium	women	2012	85.0595
non-lifestyle combined	Belgium	women	2013	85.2773
non-lifestyle combined	Belgium	women	2014	85.8588
all-cause	Czech Republic	women	1953	69.9015
all-cause	Czech Republic	women	1954	70.5583
all-cause	Czech Republic	women	1955	71.5521
all-cause	Czech Republic	women	1956	71.9627
all-cause	Czech Republic	women	1957	71.6834
all-cause	Czech Republic	women	1958	72.6348
all-cause	Czech Republic	women	1959	72.6812
all-cause	Czech Republic	women	1960	73.3343
all-cause	Czech Republic	women	1961	73.5522
all-cause	Czech Republic	women	1962	72.8616
all-cause	Czech Republic	women	1963	73.4614
all-cause	Czech Republic	women	1964	73.6492
all-cause	Czech Republic	women	1965	73.3815
all-cause	Czech Republic	women	1966	73.7265
all-cause	Czech Republic	women	1967	73.6566
all-cause	Czech Republic	women	1968	73.3762
all-cause	Czech Republic	women	1969	73.0583
all-cause	Czech Republic	women	1970	72.9875
all-cause	Czech Republic	women	1971	73.3703
all-cause	Czech Republic	women	1972	73.6559
all-cause	Czech Republic	women	1973	73.6922
all-cause	Czech Republic	women	1974	73.6009
all-cause	Czech Republic	women	1975	73.9965
all-cause	Czech Republic	women	1976	74.195
all-cause	Czech Republic	women	1977	74.1992
all-cause	Czech Republic	women	1978	74.2543
all-cause	Czech Republic	women	1979	74.3381
all-cause	Czech Republic	women	1980	73.9234
all-cause	Czech Republic	women	1981	74.3926
all-cause	Czech Republic	women	1982	74.4678
all-cause	Czech Republic	women	1983	74.3024
all-cause	Czech Republic	women	1984	74.5037
all-cause	Czech Republic	women	1985	74.7662
all-cause	Czech Republic	women	1986	74.6705
all-cause	Czech Republic	women	1987	75.1972
all-cause	Czech Republic	women	1988	75.3503
all-cause	Czech Republic	women	1989	75.4285
all-cause	Czech Republic	women	1990	75.4046
all-cause	Czech Republic	women	1991	75.7483
all-cause	Czech Republic	women	1992	76.1814
all-cause	Czech Republic	women	1993	76.4322
all-cause	Czech Republic	women	1994	76.6511
all-cause	Czech Republic	women	1995	76.6533
all-cause	Czech Republic	women	1996	77.3216
all-cause	Czech Republic	women	1997	77.429
all-cause	Czech Republic	women	1998	77.9901
all-cause	Czech Republic	women	1999	78.0826
all-cause	Czech Republic	women	2000	78.3332
all-cause	Czech Republic	women	2001	78.5167
all-cause	Czech Republic	women	2002	78.7134
all-cause	Czech Republic	women	2003	78.66
all-cause	Czech Republic	women	2004	79.22
all-cause	Czech Republic	women	2005	79.2895
all-cause	Czech Republic	women	2006	79.8624
all-cause	Czech Republic	women	2007	80.0799
all-cause	Czech Republic	women	2008	80.3115
all-cause	Czech Republic	women	2009	80.2996
all-cause	Czech Republic	women	2010	80.6478
all-cause	Czech Republic	women	2011	80.8692
all-cause	Czech Republic	women	2012	80.9863
all-cause	Czech Republic	women	2013	81.1571
all-cause	Czech Republic	women	2014	81.7353
non-smoking	Czech Republic	women	1953	70.1155
non-smoking	Czech Republic	women	1954	70.8572
non-smoking	Czech Republic	women	1955	71.8811
non-smoking	Czech Republic	women	1956	72.267
non-smoking	Czech Republic	women	1957	71.9951
non-smoking	Czech Republic	women	1958	72.9178
non-smoking	Czech Republic	women	1959	73.0097
non-smoking	Czech Republic	women	1960	73.5877
non-smoking	Czech Republic	women	1961	73.8513
non-smoking	Czech Republic	women	1962	73.1356
non-smoking	Czech Republic	women	1963	73.7474
non-smoking	Czech Republic	women	1964	74.0225
non-smoking	Czech Republic	women	1965	73.7156
non-smoking	Czech Republic	women	1966	74.0551
non-smoking	Czech Republic	women	1967	73.9977
non-smoking	Czech Republic	women	1968	73.6684
non-smoking	Czech Republic	women	1969	73.4714
non-smoking	Czech Republic	women	1970	73.3088
non-smoking	Czech Republic	women	1971	73.6558
non-smoking	Czech Republic	women	1972	73.9748
non-smoking	Czech Republic	women	1973	73.963
non-smoking	Czech Republic	women	1974	73.8876
non-smoking	Czech Republic	women	1975	74.3098
non-smoking	Czech Republic	women	1976	74.5597
non-smoking	Czech Republic	women	1977	74.5503
non-smoking	Czech Republic	women	1978	74.7287
non-smoking	Czech Republic	women	1979	74.783
non-smoking	Czech Republic	women	1980	74.3684
non-smoking	Czech Republic	women	1981	74.8466
non-smoking	Czech Republic	women	1982	74.92
non-smoking	Czech Republic	women	1983	74.8411
non-smoking	Czech Republic	women	1984	75.0982
non-smoking	Czech Republic	women	1985	75.3335
non-smoking	Czech Republic	women	1986	75.2847
non-smoking	Czech Republic	women	1987	75.8439
non-smoking	Czech Republic	women	1988	75.9764
non-smoking	Czech Republic	women	1989	76.1323
non-smoking	Czech Republic	women	1990	76.1186
non-smoking	Czech Republic	women	1991	76.5845
non-smoking	Czech Republic	women	1992	77.0164
non-smoking	Czech Republic	women	1993	77.2254
non-smoking	Czech Republic	women	1994	77.5494
non-smoking	Czech Republic	women	1995	77.5968
non-smoking	Czech Republic	women	1996	78.2659
non-smoking	Czech Republic	women	1997	78.3116
non-smoking	Czech Republic	women	1998	78.9474
non-smoking	Czech Republic	women	1999	79.1191
non-smoking	Czech Republic	women	2000	79.35
non-smoking	Czech Republic	women	2001	79.5941
non-smoking	Czech Republic	women	2002	79.7245
non-smoking	Czech Republic	women	2003	79.7077
non-smoking	Czech Republic	women	2004	80.2391
non-smoking	Czech Republic	women	2005	80.3223
non-smoking	Czech Republic	women	2006	80.9522
non-smoking	Czech Republic	women	2007	81.1263
non-smoking	Czech Republic	women	2008	81.3768
non-smoking	Czech Republic	women	2009	81.3137
non-smoking	Czech Republic	women	2010	81.7322
non-smoking	Czech Republic	women	2011	82.0281
non-smoking	Czech Republic	women	2012	82.1752
non-smoking	Czech Republic	women	2013	82.2715
non-smoking	Czech Republic	women	2014	82.7949
non-alcohol	Czech Republic	women	1990	75.6981
non-alcohol	Czech Republic	women	1991	76.0481
non-alcohol	Czech Republic	women	1992	76.4824
non-alcohol	Czech Republic	women	1993	76.7283
non-alcohol	Czech Republic	women	1994	76.9483
non-alcohol	Czech Republic	women	1995	76.9607
non-alcohol	Czech Republic	women	1996	77.6271
non-alcohol	Czech Republic	women	1997	77.7565
non-alcohol	Czech Republic	women	1998	78.33
non-alcohol	Czech Republic	women	1999	78.4321
non-alcohol	Czech Republic	women	2000	78.701
non-alcohol	Czech Republic	women	2001	78.8868
non-alcohol	Czech Republic	women	2002	79.0783
non-alcohol	Czech Republic	women	2003	79.0326
non-alcohol	Czech Republic	women	2004	79.583
non-alcohol	Czech Republic	women	2005	79.6573
non-alcohol	Czech Republic	women	2006	80.2255
non-alcohol	Czech Republic	women	2007	80.4325
non-alcohol	Czech Republic	women	2008	80.6634
non-alcohol	Czech Republic	women	2009	80.6355
non-alcohol	Czech Republic	women	2010	80.9748
non-alcohol	Czech Republic	women	2011	81.193
non-alcohol	Czech Republic	women	2012	81.3059
non-alcohol	Czech Republic	women	2013	81.4696
non-alcohol	Czech Republic	women	2014	82.0386
non-obesity	Czech Republic	women	1975	74.9011
non-obesity	Czech Republic	women	1976	75.1118
non-obesity	Czech Republic	women	1977	75.1356
non-obesity	Czech Republic	women	1978	75.2176
non-obesity	Czech Republic	women	1979	75.325
non-obesity	Czech Republic	women	1980	74.9194
non-obesity	Czech Republic	women	1981	75.4106
non-obesity	Czech Republic	women	1982	75.499
non-obesity	Czech Republic	women	1983	75.3413
non-obesity	Czech Republic	women	1984	75.5553
non-obesity	Czech Republic	women	1985	75.8199
non-obesity	Czech Republic	women	1986	75.7394
non-obesity	Czech Republic	women	1987	76.2689
non-obesity	Czech Republic	women	1988	76.4326
non-obesity	Czech Republic	women	1989	76.5122
non-obesity	Czech Republic	women	1990	76.4966
non-obesity	Czech Republic	women	1991	76.8402
non-obesity	Czech Republic	women	1992	77.2774
non-obesity	Czech Republic	women	1993	77.5183
non-obesity	Czech Republic	women	1994	77.7287
non-obesity	Czech Republic	women	1995	77.7421
non-obesity	Czech Republic	women	1996	78.4027
non-obesity	Czech Republic	women	1997	78.5148
non-obesity	Czech Republic	women	1998	79.0645
non-obesity	Czech Republic	women	1999	79.1522
non-obesity	Czech Republic	women	2000	79.4063
non-obesity	Czech Republic	women	2001	79.5966
non-obesity	Czech Republic	women	2002	79.7848
non-obesity	Czech Republic	women	2003	79.7348
non-obesity	Czech Republic	women	2004	80.2897
non-obesity	Czech Republic	women	2005	80.362
non-obesity	Czech Republic	women	2006	80.9366
non-obesity	Czech Republic	women	2007	81.1529
non-obesity	Czech Republic	women	2008	81.3902
non-obesity	Czech Republic	women	2009	81.3697
non-obesity	Czech Republic	women	2010	81.7199
non-obesity	Czech Republic	women	2011	81.9484
non-obesity	Czech Republic	women	2012	82.0638
non-obesity	Czech Republic	women	2013	82.2402
non-obesity	Czech Republic	women	2014	82.8085
non-lifestyle combined	Czech Republic	women	1990	77.4356
non-lifestyle combined	Czech Republic	women	1991	77.8972
non-lifestyle combined	Czech Republic	women	1992	78.3263
non-lifestyle combined	Czech Republic	women	1993	78.5337
non-lifestyle combined	Czech Republic	women	1994	78.8427
non-lifestyle combined	Czech Republic	women	1995	78.9022
non-lifestyle combined	Czech Republic	women	1996	79.5639
non-lifestyle combined	Czech Republic	women	1997	79.6284
non-lifestyle combined	Czech Republic	women	1998	80.2633
non-lifestyle combined	Czech Republic	women	1999	80.4284
non-lifestyle combined	Czech Republic	women	2000	80.6812
non-lifestyle combined	Czech Republic	women	2001	80.9299
non-lifestyle combined	Czech Republic	women	2002	81.0557
non-lifestyle combined	Czech Republic	women	2003	81.0381
non-lifestyle combined	Czech Republic	women	2004	81.5576
non-lifestyle combined	Czech Republic	women	2005	81.6467
non-lifestyle combined	Czech Republic	women	2006	82.2666
non-lifestyle combined	Czech Republic	women	2007	82.4346
non-lifestyle combined	Czech Republic	women	2008	82.6896
non-lifestyle combined	Czech Republic	women	2009	82.6029
non-lifestyle combined	Czech Republic	women	2010	83.0167
non-lifestyle combined	Czech Republic	women	2011	83.3111
non-lifestyle combined	Czech Republic	women	2012	83.4489
non-lifestyle combined	Czech Republic	women	2013	83.5512
non-lifestyle combined	Czech Republic	women	2014	84.0583
all-cause	Denmark	women	1951	72.1457
all-cause	Denmark	women	1952	72.1447
all-cause	Denmark	women	1953	72.4662
all-cause	Denmark	women	1954	72.8006
all-cause	Denmark	women	1955	73.452
all-cause	Denmark	women	1956	73.7084
all-cause	Denmark	women	1957	73.4881
all-cause	Denmark	women	1958	74.0246
all-cause	Denmark	women	1959	73.866
all-cause	Denmark	women	1960	74.0104
all-cause	Denmark	women	1961	74.3786
all-cause	Denmark	women	1962	74.4325
all-cause	Denmark	women	1963	74.4828
all-cause	Denmark	women	1964	74.7933
all-cause	Denmark	women	1965	74.6476
all-cause	Denmark	women	1966	74.7898
all-cause	Denmark	women	1967	75.3589
all-cause	Denmark	women	1968	75.582
all-cause	Denmark	women	1969	75.7036
all-cause	Denmark	women	1970	75.9279
all-cause	Denmark	women	1971	76.165
all-cause	Denmark	women	1972	76.2233
all-cause	Denmark	women	1973	76.539
all-cause	Denmark	women	1974	76.8249
all-cause	Denmark	women	1975	77.0015
all-cause	Denmark	women	1976	76.7037
all-cause	Denmark	women	1977	77.6839
all-cause	Denmark	women	1978	77.4306
all-cause	Denmark	women	1979	77.4056
all-cause	Denmark	women	1980	77.1852
all-cause	Denmark	women	1981	77.3642
all-cause	Denmark	women	1982	77.6481
all-cause	Denmark	women	1983	77.5384
all-cause	Denmark	women	1984	77.6271
all-cause	Denmark	women	1985	77.4819
all-cause	Denmark	women	1986	77.5359
all-cause	Denmark	women	1987	77.7982
all-cause	Denmark	women	1988	77.6374
all-cause	Denmark	women	1989	77.7601
all-cause	Denmark	women	1990	77.7338
all-cause	Denmark	women	1991	77.9848
all-cause	Denmark	women	1992	77.9673
all-cause	Denmark	women	1993	77.7692
all-cause	Denmark	women	1994	78.0974
all-cause	Denmark	women	1995	77.8304
all-cause	Denmark	women	1996	78.2549
all-cause	Denmark	women	1997	78.4665
all-cause	Denmark	women	1998	78.8861
all-cause	Denmark	women	1999	78.8894
all-cause	Denmark	women	2000	79.1189
all-cause	Denmark	women	2001	79.2154
all-cause	Denmark	women	2002	79.3388
all-cause	Denmark	women	2003	80.041
all-cause	Denmark	women	2004	79.8056
all-cause	Denmark	women	2005	80.4454
all-cause	Denmark	women	2006	80.5137
all-cause	Denmark	women	2007	80.5285
all-cause	Denmark	women	2008	80.9176
all-cause	Denmark	women	2009	81.0317
all-cause	Denmark	women	2010	81.3245
all-cause	Denmark	women	2011	81.8237
all-cause	Denmark	women	2012	82.0294
all-cause	Denmark	women	2013	82.3081
all-cause	Denmark	women	2014	82.6716
non-smoking	Denmark	women	1951	72.1885
non-smoking	Denmark	women	1952	72.2656
non-smoking	Denmark	women	1953	72.6255
non-smoking	Denmark	women	1954	72.9398
non-smoking	Denmark	women	1955	73.6019
non-smoking	Denmark	women	1956	73.7653
non-smoking	Denmark	women	1957	73.6814
non-smoking	Denmark	women	1958	74.1403
non-smoking	Denmark	women	1959	74.0494
non-smoking	Denmark	women	1960	74.2964
non-smoking	Denmark	women	1961	74.5935
non-smoking	Denmark	women	1962	74.7332
non-smoking	Denmark	women	1963	74.7958
non-smoking	Denmark	women	1964	75.1265
non-smoking	Denmark	women	1965	75.0589
non-smoking	Denmark	women	1966	75.1591
non-smoking	Denmark	women	1967	75.9021
non-smoking	Denmark	women	1968	75.9898
non-smoking	Denmark	women	1969	76.2852
non-smoking	Denmark	women	1970	76.564
non-smoking	Denmark	women	1971	76.8595
non-smoking	Denmark	women	1972	77.0263
non-smoking	Denmark	women	1973	77.1932
non-smoking	Denmark	women	1974	77.5964
non-smoking	Denmark	women	1975	77.8911
non-smoking	Denmark	women	1976	77.8308
non-smoking	Denmark	women	1977	78.6244
non-smoking	Denmark	women	1978	78.5516
non-smoking	Denmark	women	1979	78.7109
non-smoking	Denmark	women	1980	78.4423
non-smoking	Denmark	women	1981	78.7854
non-smoking	Denmark	women	1982	79.0917
non-smoking	Denmark	women	1983	79.3597
non-smoking	Denmark	women	1984	79.5532
non-smoking	Denmark	women	1985	79.2841
non-smoking	Denmark	women	1986	79.4297
non-smoking	Denmark	women	1987	79.9596
non-smoking	Denmark	women	1988	79.8709
non-smoking	Denmark	women	1989	79.822
non-smoking	Denmark	women	1990	80.0028
non-smoking	Denmark	women	1991	80.3846
non-smoking	Denmark	women	1992	80.2467
non-smoking	Denmark	women	1993	80.2068
non-smoking	Denmark	women	1994	80.7429
non-smoking	Denmark	women	1995	80.5223
non-smoking	Denmark	women	1996	80.8195
non-smoking	Denmark	women	1997	81.2288
non-smoking	Denmark	women	1998	81.4835
non-smoking	Denmark	women	1999	81.5684
non-smoking	Denmark	women	2000	81.7741
non-smoking	Denmark	women	2001	81.8793
non-smoking	Denmark	women	2002	81.9066
non-smoking	Denmark	women	2003	82.627
non-smoking	Denmark	women	2004	82.5583
non-smoking	Denmark	women	2005	83.1935
non-smoking	Denmark	women	2006	83.288
non-smoking	Denmark	women	2007	83.0365
non-smoking	Denmark	women	2008	83.5949
non-smoking	Denmark	women	2009	83.6513
non-smoking	Denmark	women	2010	83.9616
non-smoking	Denmark	women	2011	84.3592
non-smoking	Denmark	women	2012	84.5759
non-smoking	Denmark	women	2013	84.7426
non-smoking	Denmark	women	2014	85.0351
non-alcohol	Denmark	women	1990	78.2606
non-alcohol	Denmark	women	1991	78.5055
non-alcohol	Denmark	women	1992	78.4971
non-alcohol	Denmark	women	1993	78.3026
non-alcohol	Denmark	women	1994	78.6465
non-alcohol	Denmark	women	1995	78.3854
non-alcohol	Denmark	women	1996	78.8146
non-alcohol	Denmark	women	1997	79.0393
non-alcohol	Denmark	women	1998	79.4529
non-alcohol	Denmark	women	1999	79.4919
non-alcohol	Denmark	women	2000	79.6908
non-alcohol	Denmark	women	2001	79.7845
non-alcohol	Denmark	women	2002	79.9122
non-alcohol	Denmark	women	2003	80.6211
non-alcohol	Denmark	women	2004	80.3716
non-alcohol	Denmark	women	2005	81.0078
non-alcohol	Denmark	women	2006	81.0744
non-alcohol	Denmark	women	2007	81.088
non-alcohol	Denmark	women	2008	81.4585
non-alcohol	Denmark	women	2009	81.5435
non-alcohol	Denmark	women	2010	81.8127
non-alcohol	Denmark	women	2011	82.2886
non-alcohol	Denmark	women	2012	82.475
non-alcohol	Denmark	women	2013	82.7331
non-alcohol	Denmark	women	2014	83.0844
non-obesity	Denmark	women	1975	77.4657
non-obesity	Denmark	women	1976	77.181
non-obesity	Denmark	women	1977	78.168
non-obesity	Denmark	women	1978	77.9254
non-obesity	Denmark	women	1979	77.9125
non-obesity	Denmark	women	1980	77.7094
non-obesity	Denmark	women	1981	77.8977
non-obesity	Denmark	women	1982	78.1946
non-obesity	Denmark	women	1983	78.0932
non-obesity	Denmark	women	1984	78.1971
non-obesity	Denmark	women	1985	78.0609
non-obesity	Denmark	women	1986	78.1342
non-obesity	Denmark	women	1987	78.4039
non-obesity	Denmark	women	1988	78.2553
non-obesity	Denmark	women	1989	78.3861
non-obesity	Denmark	women	1990	78.3703
non-obesity	Denmark	women	1991	78.6295
non-obesity	Denmark	women	1992	78.6202
non-obesity	Denmark	women	1993	78.4343
non-obesity	Denmark	women	1994	78.7729
non-obesity	Denmark	women	1995	78.5194
non-obesity	Denmark	women	1996	78.9478
non-obesity	Denmark	women	1997	79.1689
non-obesity	Denmark	women	1998	79.5945
non-obesity	Denmark	women	1999	79.602
non-obesity	Denmark	women	2000	79.8345
non-obesity	Denmark	women	2001	79.9311
non-obesity	Denmark	women	2002	80.054
non-obesity	Denmark	women	2003	80.756
non-obesity	Denmark	women	2004	80.5324
non-obesity	Denmark	women	2005	81.169
non-obesity	Denmark	women	2006	81.2442
non-obesity	Denmark	women	2007	81.2658
non-obesity	Denmark	women	2008	81.6571
non-obesity	Denmark	women	2009	81.7702
non-obesity	Denmark	women	2010	82.0642
non-obesity	Denmark	women	2011	82.5554
non-obesity	Denmark	women	2012	82.7689
non-obesity	Denmark	women	2013	83.0341
non-obesity	Denmark	women	2014	83.4073
non-lifestyle combined	Denmark	women	1990	80.9775
non-lifestyle combined	Denmark	women	1991	81.3478
non-lifestyle combined	Denmark	women	1992	81.2311
non-lifestyle combined	Denmark	women	1993	81.2111
non-lifestyle combined	Denmark	women	1994	81.7379
non-lifestyle combined	Denmark	women	1995	81.544
non-lifestyle combined	Denmark	women	1996	81.8456
non-lifestyle combined	Denmark	women	1997	82.2686
non-lifestyle combined	Denmark	women	1998	82.5463
non-lifestyle combined	Denmark	women	1999	82.6522
non-lifestyle combined	Denmark	women	2000	82.8438
non-lifestyle combined	Denmark	women	2001	82.9445
non-lifestyle combined	Denmark	women	2002	82.9759
non-lifestyle combined	Denmark	women	2003	83.6915
non-lifestyle combined	Denmark	women	2004	83.6197
non-lifestyle combined	Denmark	women	2005	84.2329
non-lifestyle combined	Denmark	women	2006	84.3431
non-lifestyle combined	Denmark	women	2007	84.1194
non-lifestyle combined	Denmark	women	2008	84.6545
non-lifestyle combined	Denmark	women	2009	84.6857
non-lifestyle combined	Denmark	women	2010	84.9834
non-lifestyle combined	Denmark	women	2011	85.3581
non-lifestyle combined	Denmark	women	2012	85.5722
non-lifestyle combined	Denmark	women	2013	85.7191
non-lifestyle combined	Denmark	women	2014	86.0005
all-cause	Finland	women	1952	69.4736
all-cause	Finland	women	1953	69.7451
all-cause	Finland	women	1954	70.6447
all-cause	Finland	women	1955	70.6525
all-cause	Finland	women	1956	71.1843
all-cause	Finland	women	1957	70.5829
all-cause	Finland	women	1958	71.7137
all-cause	Finland	women	1959	72.1518
all-cause	Finland	women	1960	72.4021
all-cause	Finland	women	1961	72.243
all-cause	Finland	women	1962	72.2442
all-cause	Finland	women	1963	72.6869
all-cause	Finland	women	1964	72.9629
all-cause	Finland	women	1965	72.8557
all-cause	Finland	women	1966	73.1763
all-cause	Finland	women	1967	73.5853
all-cause	Finland	women	1968	73.5725
all-cause	Finland	women	1969	73.5683
all-cause	Finland	women	1970	74.3982
all-cause	Finland	women	1971	74.3142
all-cause	Finland	women	1972	75.0388
all-cause	Finland	women	1973	75.6867
all-cause	Finland	women	1974	75.5602
all-cause	Finland	women	1975	76.1538
all-cause	Finland	women	1976	76.3351
all-cause	Finland	women	1977	76.9706
all-cause	Finland	women	1978	77.4498
all-cause	Finland	women	1979	77.5618
all-cause	Finland	women	1980	77.8634
all-cause	Finland	women	1981	78.1094
all-cause	Finland	women	1982	78.6134
all-cause	Finland	women	1983	78.3618
all-cause	Finland	women	1984	78.775
all-cause	Finland	women	1985	78.5166
all-cause	Finland	women	1986	78.7677
all-cause	Finland	women	1987	78.7111
all-cause	Finland	women	1988	78.6963
all-cause	Finland	women	1989	78.9044
all-cause	Finland	women	1990	78.8952
all-cause	Finland	women	1991	79.3251
all-cause	Finland	women	1992	79.4404
all-cause	Finland	women	1993	79.4831
all-cause	Finland	women	1994	80.1507
all-cause	Finland	women	1995	80.218
all-cause	Finland	women	1996	80.5473
all-cause	Finland	women	1997	80.5232
all-cause	Finland	women	1998	80.8417
all-cause	Finland	women	1999	81.0401
all-cause	Finland	women	2000	81.0316
all-cause	Finland	women	2001	81.5446
all-cause	Finland	women	2002	81.5411
all-cause	Finland	women	2003	81.8232
all-cause	Finland	women	2004	82.275
all-cause	Finland	women	2005	82.304
all-cause	Finland	women	2006	82.8379
all-cause	Finland	women	2007	82.8707
all-cause	Finland	women	2008	83.0137
all-cause	Finland	women	2009	83.1227
all-cause	Finland	women	2010	83.2528
all-cause	Finland	women	2011	83.5516
all-cause	Finland	women	2012	83.408
all-cause	Finland	women	2013	83.8276
all-cause	Finland	women	2014	83.8585
non-smoking	Finland	women	1952	69.6931
non-smoking	Finland	women	1953	69.7872
non-smoking	Finland	women	1954	70.7769
non-smoking	Finland	women	1955	70.7964
non-smoking	Finland	women	1956	71.211
non-smoking	Finland	women	1957	70.6973
non-smoking	Finland	women	1958	71.7619
non-smoking	Finland	women	1959	72.2826
non-smoking	Finland	women	1960	72.4113
non-smoking	Finland	women	1961	72.3218
non-smoking	Finland	women	1962	72.295
non-smoking	Finland	women	1963	72.8011
non-smoking	Finland	women	1964	73.0445
non-smoking	Finland	women	1965	72.9268
non-smoking	Finland	women	1966	73.2219
non-smoking	Finland	women	1967	73.6805
non-smoking	Finland	women	1968	73.6697
non-smoking	Finland	women	1969	73.6593
non-smoking	Finland	women	1970	74.4531
non-smoking	Finland	women	1971	74.4243
non-smoking	Finland	women	1972	75.196
non-smoking	Finland	women	1973	75.7273
non-smoking	Finland	women	1974	75.6459
non-smoking	Finland	women	1975	76.2563
non-smoking	Finland	women	1976	76.5449
non-smoking	Finland	women	1977	77.2225
non-smoking	Finland	women	1978	77.6426
non-smoking	Finland	women	1979	77.7752
non-smoking	Finland	women	1980	78.2026
non-smoking	Finland	women	1981	78.409
non-smoking	Finland	women	1982	78.9102
non-smoking	Finland	women	1983	78.5988
non-smoking	Finland	women	1984	79.0845
non-smoking	Finland	women	1985	78.9299
non-smoking	Finland	women	1986	79.1206
non-smoking	Finland	women	1987	79.0715
non-smoking	Finland	women	1988	79.0663
non-smoking	Finland	women	1989	79.2722
non-smoking	Finland	women	1990	79.3004
non-smoking	Finland	women	1991	79.7083
non-smoking	Finland	women	1992	79.8921
non-smoking	Finland	women	1993	79.8648
non-smoking	Finland	women	1994	80.5733
non-smoking	Finland	women	1995	80.611
non-smoking	Finland	women	1996	80.9832
non-smoking	Finland	women	1997	80.9371
non-smoking	Finland	women	1998	81.3667
non-smoking	Finland	women	1999	81.4826
non-smoking	Finland	women	2000	81.524
non-smoking	Finland	women	2001	82.0842
non-smoking	Finland	women	2002	82.034
non-smoking	Finland	women	2003	82.3983
non-smoking	Finland	women	2004	82.7806
non-smoking	Finland	women	2005	82.8701
non-smoking	Finland	women	2006	83.4014
non-smoking	Finland	women	2007	83.4603
non-smoking	Finland	women	2008	83.6483
non-smoking	Finland	women	2009	83.733
non-smoking	Finland	women	2010	83.9528
non-smoking	Finland	women	2011	84.2302
non-smoking	Finland	women	2012	84.1641
non-smoking	Finland	women	2013	84.5527
non-smoking	Finland	women	2014	84.6183
non-alcohol	Finland	women	1990	79.1391
non-alcohol	Finland	women	1991	79.5746
non-alcohol	Finland	women	1992	79.6992
non-alcohol	Finland	women	1993	79.7443
non-alcohol	Finland	women	1994	80.4183
non-alcohol	Finland	women	1995	80.4983
non-alcohol	Finland	women	1996	80.8366
non-alcohol	Finland	women	1997	80.8358
non-alcohol	Finland	women	1998	81.1693
non-alcohol	Finland	women	1999	81.3818
non-alcohol	Finland	women	2000	81.3911
non-alcohol	Finland	women	2001	81.9102
non-alcohol	Finland	women	2002	81.9065
non-alcohol	Finland	women	2003	82.1988
non-alcohol	Finland	women	2004	82.6911
non-alcohol	Finland	women	2005	82.7305
non-alcohol	Finland	women	2006	83.2483
non-alcohol	Finland	women	2007	83.2812
non-alcohol	Finland	women	2008	83.4239
non-alcohol	Finland	women	2009	83.5296
non-alcohol	Finland	women	2010	83.648
non-alcohol	Finland	women	2011	83.9354
non-alcohol	Finland	women	2012	83.7849
non-alcohol	Finland	women	2013	84.1914
non-alcohol	Finland	women	2014	84.197
non-obesity	Finland	women	1975	76.6524
non-obesity	Finland	women	1976	76.8489
non-obesity	Finland	women	1977	77.4988
non-obesity	Finland	women	1978	77.9932
non-obesity	Finland	women	1979	78.1231
non-obesity	Finland	women	1980	78.4275
non-obesity	Finland	women	1981	78.6948
non-obesity	Finland	women	1982	79.2217
non-obesity	Finland	women	1983	78.9834
non-obesity	Finland	women	1984	79.4106
non-obesity	Finland	women	1985	79.1579
non-obesity	Finland	women	1986	79.4349
non-obesity	Finland	women	1987	79.3985
non-obesity	Finland	women	1988	79.3971
non-obesity	Finland	women	1989	79.6167
non-obesity	Finland	women	1990	79.625
non-obesity	Finland	women	1991	80.0678
non-obesity	Finland	women	1992	80.1999
non-obesity	Finland	women	1993	80.2432
non-obesity	Finland	women	1994	80.9199
non-obesity	Finland	women	1995	81.0062
non-obesity	Finland	women	1996	81.3324
non-obesity	Finland	women	1997	81.3317
non-obesity	Finland	women	1998	81.6574
non-obesity	Finland	women	1999	81.858
non-obesity	Finland	women	2000	81.8689
non-obesity	Finland	women	2001	82.3899
non-obesity	Finland	women	2002	82.3823
non-obesity	Finland	women	2003	82.6747
non-obesity	Finland	women	2004	83.1487
non-obesity	Finland	women	2005	83.1958
non-obesity	Finland	women	2006	83.7237
non-obesity	Finland	women	2007	83.7592
non-obesity	Finland	women	2008	83.9135
non-obesity	Finland	women	2009	84.0326
non-obesity	Finland	women	2010	84.1658
non-obesity	Finland	women	2011	84.4613
non-obesity	Finland	women	2012	84.3283
non-obesity	Finland	women	2013	84.7514
non-obesity	Finland	women	2014	84.7806
non-lifestyle combined	Finland	women	1990	80.2499
non-lifestyle combined	Finland	women	1991	80.6708
non-lifestyle combined	Finland	women	1992	80.8789
non-lifestyle combined	Finland	women	1993	80.8579
non-lifestyle combined	Finland	women	1994	81.5811
non-lifestyle combined	Finland	women	1995	81.6446
non-lifestyle combined	Finland	women	1996	82.0242
non-lifestyle combined	Finland	women	1997	82.019
non-lifestyle combined	Finland	women	1998	82.4642
non-lifestyle combined	Finland	women	1999	82.6056
non-lifestyle combined	Finland	women	2000	82.6741
non-lifestyle combined	Finland	women	2001	83.2419
non-lifestyle combined	Finland	women	2002	83.1828
non-lifestyle combined	Finland	women	2003	83.5656
non-lifestyle combined	Finland	women	2004	84.0057
non-lifestyle combined	Finland	women	2005	84.1194
non-lifestyle combined	Finland	women	2006	84.6298
non-lifestyle combined	Finland	women	2007	84.6764
non-lifestyle combined	Finland	women	2008	84.8793
non-lifestyle combined	Finland	women	2009	84.9672
non-lifestyle combined	Finland	women	2010	85.182
non-lifestyle combined	Finland	women	2011	85.442
non-lifestyle combined	Finland	women	2012	85.3788
non-lifestyle combined	Finland	women	2013	85.7553
non-lifestyle combined	Finland	women	2014	85.8019
all-cause	France	women	1950	69.1623
all-cause	France	women	1951	68.8695
all-cause	France	women	1952	70.1999
all-cause	France	women	1953	70.2136
all-cause	France	women	1954	71.1955
all-cause	France	women	1955	71.5265
all-cause	France	women	1956	71.6608
all-cause	France	women	1957	72.2002
all-cause	France	women	1958	73.2216
all-cause	France	women	1959	73.3541
all-cause	France	women	1960	73.6056
all-cause	France	women	1961	74.3621
all-cause	France	women	1962	73.8953
all-cause	France	women	1963	73.8045
all-cause	France	women	1964	74.821
all-cause	France	women	1965	74.7216
all-cause	France	women	1966	75.178
all-cause	France	women	1967	75.2
all-cause	France	women	1968	75.219
all-cause	France	women	1969	75.0475
all-cause	France	women	1970	75.814
all-cause	France	women	1971	75.8781
all-cause	France	women	1972	76.1939
all-cause	France	women	1973	76.319
all-cause	France	women	1974	76.7488
all-cause	France	women	1975	76.8722
all-cause	France	women	1976	77.1995
all-cause	France	women	1977	77.8381
all-cause	France	women	1978	77.9606
all-cause	France	women	1979	78.2823
all-cause	France	women	1980	78.4021
all-cause	France	women	1981	78.5021
all-cause	France	women	1982	78.896
all-cause	France	women	1983	78.8221
all-cause	France	women	1984	79.3632
all-cause	France	women	1985	79.4535
all-cause	France	women	1986	79.7147
all-cause	France	women	1987	80.3026
all-cause	France	women	1988	80.4936
all-cause	France	women	1989	80.6737
all-cause	France	women	1990	80.9762
all-cause	France	women	1991	81.1776
all-cause	France	women	1992	81.4684
all-cause	France	women	1993	81.4698
all-cause	France	women	1994	81.8973
all-cause	France	women	1995	81.906
all-cause	France	women	1996	82.0607
all-cause	France	women	1997	82.3157
all-cause	France	women	1998	82.42
all-cause	France	women	1999	82.5237
all-cause	France	women	2000	82.808
all-cause	France	women	2001	82.9496
all-cause	France	women	2002	83.0457
all-cause	France	women	2003	82.9546
all-cause	France	women	2004	83.8706
all-cause	France	women	2005	83.8235
all-cause	France	women	2006	84.1797
all-cause	France	women	2007	84.3873
all-cause	France	women	2008	84.3338
all-cause	France	women	2009	84.4323
all-cause	France	women	2010	84.6716
all-cause	France	women	2011	85.0063
all-cause	France	women	2012	84.8512
all-cause	France	women	2013	85.057
all-cause	France	women	2014	85.4553
non-smoking	France	women	1950	69.1725
non-smoking	France	women	1951	68.8756
non-smoking	France	women	1952	70.2096
non-smoking	France	women	1953	70.2314
non-smoking	France	women	1954	71.2158
non-smoking	France	women	1955	71.5309
non-smoking	France	women	1956	71.6683
non-smoking	France	women	1957	72.2217
non-smoking	France	women	1958	73.2251
non-smoking	France	women	1959	73.365
non-smoking	France	women	1960	73.6105
non-smoking	France	women	1961	74.3648
non-smoking	France	women	1962	73.9022
non-smoking	France	women	1963	73.8348
non-smoking	France	women	1964	74.8342
non-smoking	France	women	1965	74.7403
non-smoking	France	women	1966	75.2002
non-smoking	France	women	1967	75.2364
non-smoking	France	women	1968	75.2247
non-smoking	France	women	1969	75.0568
non-smoking	France	women	1970	75.8185
non-smoking	France	women	1971	75.887
non-smoking	France	women	1972	76.2024
non-smoking	France	women	1973	76.3272
non-smoking	France	women	1974	76.7576
non-smoking	France	women	1975	76.881
non-smoking	France	women	1976	77.2109
non-smoking	France	women	1977	77.8401
non-smoking	France	women	1978	77.988
non-smoking	France	women	1979	78.295
non-smoking	France	women	1980	78.4307
non-smoking	France	women	1981	78.5488
non-smoking	France	women	1982	78.9476
non-smoking	France	women	1983	78.8971
non-smoking	France	women	1984	79.4265
non-smoking	France	women	1985	79.5432
non-smoking	France	women	1986	79.8142
non-smoking	France	women	1987	80.4505
non-smoking	France	women	1988	80.6432
non-smoking	France	women	1989	80.8396
non-smoking	France	women	1990	81.1335
non-smoking	France	women	1991	81.3642
non-smoking	France	women	1992	81.6518
non-smoking	France	women	1993	81.686
non-smoking	France	women	1994	82.1212
non-smoking	France	women	1995	82.1774
non-smoking	France	women	1996	82.3608
non-smoking	France	women	1997	82.5993
non-smoking	France	women	1998	82.7695
non-smoking	France	women	1999	82.8841
non-smoking	France	women	2000	83.1425
non-smoking	France	women	2001	83.3006
non-smoking	France	women	2002	83.4637
non-smoking	France	women	2003	83.3969
non-smoking	France	women	2004	84.3361
non-smoking	France	women	2005	84.3444
non-smoking	France	women	2006	84.731
non-smoking	France	women	2007	84.9445
non-smoking	France	women	2008	84.9249
non-smoking	France	women	2009	85.0744
non-smoking	France	women	2010	85.3082
non-smoking	France	women	2011	85.6547
non-smoking	France	women	2012	85.5506
non-smoking	France	women	2013	85.7187
non-smoking	France	women	2014	86.2078
non-alcohol	France	women	1990	81.6095
non-alcohol	France	women	1991	81.7919
non-alcohol	France	women	1992	82.0682
non-alcohol	France	women	1993	82.0593
non-alcohol	France	women	1994	82.4685
non-alcohol	France	women	1995	82.4616
non-alcohol	France	women	1996	82.6027
non-alcohol	France	women	1997	82.8491
non-alcohol	France	women	1998	82.9574
non-alcohol	France	women	1999	83.052
non-alcohol	France	women	2000	83.3219
non-alcohol	France	women	2001	83.4601
non-alcohol	France	women	2002	83.5481
non-alcohol	France	women	2003	83.443
non-alcohol	France	women	2004	84.3553
non-alcohol	France	women	2005	84.2925
non-alcohol	France	women	2006	84.645
non-alcohol	France	women	2007	84.8363
non-alcohol	France	women	2008	84.775
non-alcohol	France	women	2009	84.8654
non-alcohol	France	women	2010	85.0908
non-alcohol	France	women	2011	85.4168
non-alcohol	France	women	2012	85.2378
non-alcohol	France	women	2013	85.4296
non-alcohol	France	women	2014	85.8196
non-obesity	France	women	1975	77.4264
non-obesity	France	women	1976	77.7595
non-obesity	France	women	1977	78.4038
non-obesity	France	women	1978	78.5339
non-obesity	France	women	1979	78.8616
non-obesity	France	women	1980	78.9845
non-obesity	France	women	1981	79.0877
non-obesity	France	women	1982	79.4904
non-obesity	France	women	1983	79.4202
non-obesity	France	women	1984	79.9675
non-obesity	France	women	1985	80.0611
non-obesity	France	women	1986	80.3279
non-obesity	France	women	1987	80.9226
non-obesity	France	women	1988	81.1196
non-obesity	France	women	1989	81.3009
non-obesity	France	women	1990	81.6059
non-obesity	France	women	1991	81.8165
non-obesity	France	women	1992	82.116
non-obesity	France	women	1993	82.1267
non-obesity	France	women	1994	82.5631
non-obesity	France	women	1995	82.5787
non-obesity	France	women	1996	82.741
non-obesity	France	women	1997	82.9987
non-obesity	France	women	1998	83.1095
non-obesity	France	women	1999	83.218
non-obesity	France	women	2000	83.5067
non-obesity	France	women	2001	83.657
non-obesity	France	women	2002	83.7598
non-obesity	France	women	2003	83.6732
non-obesity	France	women	2004	84.5945
non-obesity	France	women	2005	84.5486
non-obesity	France	women	2006	84.914
non-obesity	France	women	2007	85.1223
non-obesity	France	women	2008	85.0782
non-obesity	France	women	2009	85.1822
non-obesity	France	women	2010	85.4248
non-obesity	France	women	2011	85.7608
non-obesity	France	women	2012	85.6061
non-obesity	France	women	2013	85.8185
non-obesity	France	women	2014	86.2213
non-lifestyle combined	France	women	1990	82.3393
non-lifestyle combined	France	women	1991	82.5615
non-lifestyle combined	France	women	1992	82.8412
non-lifestyle combined	France	women	1993	82.8715
non-lifestyle combined	France	women	1994	83.2942
non-lifestyle combined	France	women	1995	83.3366
non-lifestyle combined	France	women	1996	83.5134
non-lifestyle combined	France	women	1997	83.7449
non-lifestyle combined	France	women	1998	83.9169
non-lifestyle combined	France	women	1999	84.0223
non-lifestyle combined	France	women	2000	84.2716
non-lifestyle combined	France	women	2001	84.4318
non-lifestyle combined	France	women	2002	84.5855
non-lifestyle combined	France	women	2003	84.502
non-lifestyle combined	France	women	2004	85.4401
non-lifestyle combined	France	women	2005	85.4307
non-lifestyle combined	France	women	2006	85.8153
non-lifestyle combined	France	women	2007	86.0149
non-lifestyle combined	France	women	2008	85.9924
non-lifestyle combined	France	women	2009	86.1347
non-lifestyle combined	France	women	2010	86.3597
non-lifestyle combined	France	women	2011	86.6966
non-lifestyle combined	France	women	2012	86.5666
non-lifestyle combined	France	women	2013	86.7337
non-lifestyle combined	France	women	2014	87.2103
all-cause	Germany	women	1970	73.5448
all-cause	Germany	women	1971	73.791
all-cause	Germany	women	1972	74.1078
all-cause	Germany	women	1973	74.3304
all-cause	Germany	women	1974	74.5901
all-cause	Germany	women	1975	74.502
all-cause	Germany	women	1976	74.9585
all-cause	Germany	women	1977	75.611
all-cause	Germany	women	1978	75.6336
all-cause	Germany	women	1979	75.9598
all-cause	Germany	women	1980	76.15
all-cause	Germany	women	1981	76.3526
all-cause	Germany	women	1982	76.6472
all-cause	Germany	women	1983	76.9361
all-cause	Germany	women	1984	77.3601
all-cause	Germany	women	1985	77.4635
all-cause	Germany	women	1986	77.6424
all-cause	Germany	women	1987	78.1109
all-cause	Germany	women	1988	78.2863
all-cause	Germany	women	1989	78.4699
all-cause	Germany	women	1990	78.425
all-cause	Germany	women	1991	78.6913
all-cause	Germany	women	1992	79.1473
all-cause	Germany	women	1993	79.2196
all-cause	Germany	women	1994	79.5175
all-cause	Germany	women	1995	79.6961
all-cause	Germany	women	1996	79.8661
all-cause	Germany	women	1997	80.275
all-cause	Germany	women	1998	80.5413
all-cause	Germany	women	1999	80.7506
all-cause	Germany	women	2000	80.9977
all-cause	Germany	women	2001	81.2777
all-cause	Germany	women	2002	81.2833
all-cause	Germany	women	2003	81.3698
all-cause	Germany	women	2004	81.8962
all-cause	Germany	women	2005	81.9721
all-cause	Germany	women	2006	82.2464
all-cause	Germany	women	2007	82.4073
all-cause	Germany	women	2008	82.3981
all-cause	Germany	women	2009	82.4904
all-cause	Germany	women	2010	82.6232
all-cause	Germany	women	2011	82.8355
all-cause	Germany	women	2012	82.9469
all-cause	Germany	women	2013	82.8674
all-cause	Germany	women	2014	83.3512
non-smoking	Germany	women	1970	73.6776
non-smoking	Germany	women	1971	73.9261
non-smoking	Germany	women	1972	74.2425
non-smoking	Germany	women	1973	74.4711
non-smoking	Germany	women	1974	74.75
non-smoking	Germany	women	1975	74.6835
non-smoking	Germany	women	1976	75.1494
non-smoking	Germany	women	1977	75.8006
non-smoking	Germany	women	1978	75.8548
non-smoking	Germany	women	1979	76.1925
non-smoking	Germany	women	1980	76.3959
non-smoking	Germany	women	1981	76.6232
non-smoking	Germany	women	1982	76.9344
non-smoking	Germany	women	1983	77.2671
non-smoking	Germany	women	1984	77.7064
non-smoking	Germany	women	1985	77.8066
non-smoking	Germany	women	1986	78.0313
non-smoking	Germany	women	1987	78.5439
non-smoking	Germany	women	1988	78.7258
non-smoking	Germany	women	1989	78.9541
non-smoking	Germany	women	1990	78.9272
non-smoking	Germany	women	1991	79.242
non-smoking	Germany	women	1992	79.703
non-smoking	Germany	women	1993	79.8215
non-smoking	Germany	women	1994	80.1464
non-smoking	Germany	women	1995	80.3344
non-smoking	Germany	women	1996	80.5133
non-smoking	Germany	women	1997	80.95
non-smoking	Germany	women	1998	81.2568
non-smoking	Germany	women	1999	81.4675
non-smoking	Germany	women	2000	81.7472
non-smoking	Germany	women	2001	82.0266
non-smoking	Germany	women	2002	82.059
non-smoking	Germany	women	2003	82.1551
non-smoking	Germany	women	2004	82.7045
non-smoking	Germany	women	2005	82.83
non-smoking	Germany	women	2006	83.1069
non-smoking	Germany	women	2007	83.2974
non-smoking	Germany	women	2008	83.3198
non-smoking	Germany	women	2009	83.4245
non-smoking	Germany	women	2010	83.5912
non-smoking	Germany	women	2011	83.8556
non-smoking	Germany	women	2012	83.9826
non-smoking	Germany	women	2013	83.932
non-smoking	Germany	women	2014	84.4244
non-alcohol	Germany	women	1990	78.9466
non-alcohol	Germany	women	1991	79.2187
non-alcohol	Germany	women	1992	79.6708
non-alcohol	Germany	women	1993	79.7405
non-alcohol	Germany	women	1994	80.0281
non-alcohol	Germany	women	1995	80.2019
non-alcohol	Germany	women	1996	80.3634
non-alcohol	Germany	women	1997	80.7597
non-alcohol	Germany	women	1998	81.0104
non-alcohol	Germany	women	1999	81.2119
non-alcohol	Germany	women	2000	81.4524
non-alcohol	Germany	women	2001	81.7222
non-alcohol	Germany	women	2002	81.72
non-alcohol	Germany	women	2003	81.7982
non-alcohol	Germany	women	2004	82.3184
non-alcohol	Germany	women	2005	82.3875
non-alcohol	Germany	women	2006	82.6517
non-alcohol	Germany	women	2007	82.8032
non-alcohol	Germany	women	2008	82.7857
non-alcohol	Germany	women	2009	82.8691
non-alcohol	Germany	women	2010	82.993
non-alcohol	Germany	women	2011	83.2027
non-alcohol	Germany	women	2012	83.2994
non-alcohol	Germany	women	2013	83.2205
non-alcohol	Germany	women	2014	83.6957
non-obesity	Germany	women	1975	75.1537
non-obesity	Germany	women	1976	75.6218
non-obesity	Germany	women	1977	76.2871
non-obesity	Germany	women	1978	76.3178
non-obesity	Germany	women	1979	76.6563
non-obesity	Germany	women	1980	76.8547
non-obesity	Germany	women	1981	77.0661
non-obesity	Germany	women	1982	77.373
non-obesity	Germany	women	1983	77.6695
non-obesity	Germany	women	1984	78.1067
non-obesity	Germany	women	1985	78.2167
non-obesity	Germany	women	1986	78.4071
non-obesity	Germany	women	1987	78.8906
non-obesity	Germany	women	1988	79.0796
non-obesity	Germany	women	1989	79.2715
non-obesity	Germany	women	1990	79.2373
non-obesity	Germany	women	1991	79.5198
non-obesity	Germany	women	1992	79.988
non-obesity	Germany	women	1993	80.0712
non-obesity	Germany	women	1994	80.3787
non-obesity	Germany	women	1995	80.5694
non-obesity	Germany	women	1996	80.7483
non-obesity	Germany	women	1997	81.1667
non-obesity	Germany	women	1998	81.4378
non-obesity	Germany	women	1999	81.6542
non-obesity	Germany	women	2000	81.9127
non-obesity	Germany	women	2001	82.1993
non-obesity	Germany	women	2002	82.2105
non-obesity	Germany	women	2003	82.2999
non-obesity	Germany	women	2004	82.8374
non-obesity	Germany	women	2005	82.9186
non-obesity	Germany	women	2006	83.2005
non-obesity	Germany	women	2007	83.3677
non-obesity	Germany	women	2008	83.3654
non-obesity	Germany	women	2009	83.4652
non-obesity	Germany	women	2010	83.6079
non-obesity	Germany	women	2011	83.8348
non-obesity	Germany	women	2012	83.9471
non-obesity	Germany	women	2013	83.8814
non-obesity	Germany	women	2014	84.377
non-lifestyle combined	Germany	women	1990	80.1992
non-lifestyle combined	Germany	women	1991	80.5309
non-lifestyle combined	Germany	women	1992	80.9988
non-lifestyle combined	Germany	women	1993	81.1206
non-lifestyle combined	Germany	women	1994	81.4402
non-lifestyle combined	Germany	women	1995	81.6365
non-lifestyle combined	Germany	women	1996	81.8118
non-lifestyle combined	Germany	women	1997	82.2403
non-lifestyle combined	Germany	women	1998	82.5356
non-lifestyle combined	Germany	women	1999	82.744
non-lifestyle combined	Germany	women	2000	83.0214
non-lifestyle combined	Germany	women	2001	83.2958
non-lifestyle combined	Germany	women	2002	83.322
non-lifestyle combined	Germany	women	2003	83.4124
non-lifestyle combined	Germany	women	2004	83.9618
non-lifestyle combined	Germany	women	2005	84.0797
non-lifestyle combined	Germany	women	2006	84.3531
non-lifestyle combined	Germany	women	2007	84.5395
non-lifestyle combined	Germany	women	2008	84.5555
non-lifestyle combined	Germany	women	2009	84.6587
non-lifestyle combined	Germany	women	2010	84.8251
non-lifestyle combined	Germany	women	2011	85.0949
non-lifestyle combined	Germany	women	2012	85.2087
non-lifestyle combined	Germany	women	2013	85.1692
non-lifestyle combined	Germany	women	2014	85.6665
all-cause	Greece	women	1981	78.05
all-cause	Greece	women	1982	78.2737
all-cause	Greece	women	1983	78.0586
all-cause	Greece	women	1984	78.5899
all-cause	Greece	women	1985	78.434
all-cause	Greece	women	1986	78.8182
all-cause	Greece	women	1987	78.5987
all-cause	Greece	women	1988	79.3125
all-cause	Greece	women	1989	79.5461
all-cause	Greece	women	1990	79.6504
all-cause	Greece	women	1991	79.8686
all-cause	Greece	women	1992	79.7848
all-cause	Greece	women	1993	80.0899
all-cause	Greece	women	1994	80.3451
all-cause	Greece	women	1995	80.4384
all-cause	Greece	women	1996	80.6063
all-cause	Greece	women	1997	80.938
all-cause	Greece	women	1998	80.8216
all-cause	Greece	women	1999	81.0356
all-cause	Greece	women	2000	81.2972
all-cause	Greece	women	2001	81.7146
all-cause	Greece	women	2002	81.8176
all-cause	Greece	women	2003	81.9559
all-cause	Greece	women	2004	82.1763
all-cause	Greece	women	2005	82.4355
all-cause	Greece	women	2006	82.6727
all-cause	Greece	women	2007	82.532
all-cause	Greece	women	2008	82.9859
all-cause	Greece	women	2009	83.1983
all-cause	Greece	women	2010	83.1894
all-cause	Greece	women	2011	83.3876
all-cause	Greece	women	2012	83.2183
all-cause	Greece	women	2013	83.7004
non-smoking	Greece	women	1981	78.3257
non-smoking	Greece	women	1982	78.5806
non-smoking	Greece	women	1983	78.36
non-smoking	Greece	women	1984	78.9143
non-smoking	Greece	women	1985	78.8357
non-smoking	Greece	women	1986	79.1527
non-smoking	Greece	women	1987	78.9122
non-smoking	Greece	women	1988	79.6821
non-smoking	Greece	women	1989	79.9106
non-smoking	Greece	women	1990	80.0471
non-smoking	Greece	women	1991	80.2546
non-smoking	Greece	women	1992	80.1608
non-smoking	Greece	women	1993	80.4726
non-smoking	Greece	women	1994	80.7361
non-smoking	Greece	women	1995	80.8229
non-smoking	Greece	women	1996	80.9854
non-smoking	Greece	women	1997	81.304
non-smoking	Greece	women	1998	81.2399
non-smoking	Greece	women	1999	81.3864
non-smoking	Greece	women	2000	81.7035
non-smoking	Greece	women	2001	82.0782
non-smoking	Greece	women	2002	82.2029
non-smoking	Greece	women	2003	82.348
non-smoking	Greece	women	2004	82.5711
non-smoking	Greece	women	2005	82.7975
non-smoking	Greece	women	2006	83.033
non-smoking	Greece	women	2007	82.937
non-smoking	Greece	women	2008	83.438
non-smoking	Greece	women	2009	83.6496
non-smoking	Greece	women	2010	83.662
non-smoking	Greece	women	2011	83.8953
non-smoking	Greece	women	2012	83.7544
non-smoking	Greece	women	2013	84.2654
non-alcohol	Greece	women	1990	79.861
non-alcohol	Greece	women	1991	80.0721
non-alcohol	Greece	women	1992	79.9855
non-alcohol	Greece	women	1993	80.279
non-alcohol	Greece	women	1994	80.5248
non-alcohol	Greece	women	1995	80.6087
non-alcohol	Greece	women	1996	80.769
non-alcohol	Greece	women	1997	81.0916
non-alcohol	Greece	women	1998	80.9693
non-alcohol	Greece	women	1999	81.181
non-alcohol	Greece	women	2000	81.4303
non-alcohol	Greece	women	2001	81.8451
non-alcohol	Greece	women	2002	81.9487
non-alcohol	Greece	women	2003	82.0842
non-alcohol	Greece	women	2004	82.3071
non-alcohol	Greece	women	2005	82.5682
non-alcohol	Greece	women	2006	82.7996
non-alcohol	Greece	women	2007	82.6608
non-alcohol	Greece	women	2008	83.1123
non-alcohol	Greece	women	2009	83.3243
non-alcohol	Greece	women	2010	83.315
non-alcohol	Greece	women	2011	83.5137
non-alcohol	Greece	women	2012	83.3452
non-alcohol	Greece	women	2013	83.827
non-obesity	Greece	women	1981	78.8008
non-obesity	Greece	women	1982	79.0327
non-obesity	Greece	women	1983	78.8242
non-obesity	Greece	women	1984	79.3718
non-obesity	Greece	women	1985	79.2238
non-obesity	Greece	women	1986	79.6097
non-obesity	Greece	women	1987	79.4062
non-obesity	Greece	women	1988	80.1257
non-obesity	Greece	women	1989	80.3702
non-obesity	Greece	women	1990	80.4727
non-obesity	Greece	women	1991	80.702
non-obesity	Greece	women	1992	80.6315
non-obesity	Greece	women	1993	80.9432
non-obesity	Greece	women	1994	81.1969
non-obesity	Greece	women	1995	81.3016
non-obesity	Greece	women	1996	81.481
non-obesity	Greece	women	1997	81.8159
non-obesity	Greece	women	1998	81.7056
non-obesity	Greece	women	1999	81.9292
non-obesity	Greece	women	2000	82.1906
non-obesity	Greece	women	2001	82.612
non-obesity	Greece	women	2002	82.7195
non-obesity	Greece	women	2003	82.8559
non-obesity	Greece	women	2004	83.0897
non-obesity	Greece	women	2005	83.3493
non-obesity	Greece	women	2006	83.588
non-obesity	Greece	women	2007	83.4592
non-obesity	Greece	women	2008	83.9192
non-obesity	Greece	women	2009	84.1329
non-obesity	Greece	women	2010	84.1277
non-obesity	Greece	women	2011	84.3365
non-obesity	Greece	women	2012	84.1731
non-obesity	Greece	women	2013	84.6626
non-lifestyle combined	Greece	women	1990	81.0474
non-lifestyle combined	Greece	women	1991	81.2556
non-lifestyle combined	Greece	women	1992	81.1779
non-lifestyle combined	Greece	women	1993	81.488
non-lifestyle combined	Greece	women	1994	81.7408
non-lifestyle combined	Greece	women	1995	81.8275
non-lifestyle combined	Greece	women	1996	81.9933
non-lifestyle combined	Greece	women	1997	82.3072
non-lifestyle combined	Greece	women	1998	82.2432
non-lifestyle combined	Greece	women	1999	82.3995
non-lifestyle combined	Greece	women	2000	82.6992
non-lifestyle combined	Greece	women	2001	83.0785
non-lifestyle combined	Greece	women	2002	83.206
non-lifestyle combined	Greece	women	2003	83.3468
non-lifestyle combined	Greece	women	2004	83.5853
non-lifestyle combined	Greece	women	2005	83.8125
non-lifestyle combined	Greece	women	2006	84.0428
non-lifestyle combined	Greece	women	2007	83.9571
non-lifestyle combined	Greece	women	2008	84.4555
non-lifestyle combined	Greece	women	2009	84.6709
non-lifestyle combined	Greece	women	2010	84.6774
non-lifestyle combined	Greece	women	2011	84.9251
non-lifestyle combined	Greece	women	2012	84.788
non-lifestyle combined	Greece	women	2013	85.2973
all-cause	Hungary	women	1955	68.7514
all-cause	Hungary	women	1956	68.3931
all-cause	Hungary	women	1957	68.4986
all-cause	Hungary	women	1958	69.4382
all-cause	Hungary	women	1959	69.4988
all-cause	Hungary	women	1960	70.1443
all-cause	Hungary	women	1961	71.1666
all-cause	Hungary	women	1962	70.1047
all-cause	Hungary	women	1963	71.178
all-cause	Hungary	women	1964	71.8396
all-cause	Hungary	women	1965	71.513
all-cause	Hungary	women	1966	72.2
all-cause	Hungary	women	1967	72.0017
all-cause	Hungary	women	1968	71.9588
all-cause	Hungary	women	1969	72.0286
all-cause	Hungary	women	1970	72.0887
all-cause	Hungary	women	1971	72.0409
all-cause	Hungary	women	1972	72.5841
all-cause	Hungary	women	1973	72.5364
all-cause	Hungary	women	1974	72.2124
all-cause	Hungary	women	1975	72.4949
all-cause	Hungary	women	1976	72.5967
all-cause	Hungary	women	1977	73.1013
all-cause	Hungary	women	1978	72.8291
all-cause	Hungary	women	1979	73.1708
all-cause	Hungary	women	1980	72.7542
all-cause	Hungary	women	1981	72.926
all-cause	Hungary	women	1982	73.1946
all-cause	Hungary	women	1983	72.9678
all-cause	Hungary	women	1984	73.1292
all-cause	Hungary	women	1985	73.0021
all-cause	Hungary	women	1986	73.1568
all-cause	Hungary	women	1987	73.6962
all-cause	Hungary	women	1988	73.9787
all-cause	Hungary	women	1989	73.7196
all-cause	Hungary	women	1990	73.7745
all-cause	Hungary	women	1991	73.969
all-cause	Hungary	women	1992	73.9389
all-cause	Hungary	women	1993	73.9831
all-cause	Hungary	women	1994	74.4598
all-cause	Hungary	women	1995	74.7214
all-cause	Hungary	women	1996	75.0023
all-cause	Hungary	women	1997	75.4512
all-cause	Hungary	women	1998	75.5279
all-cause	Hungary	women	1999	75.4992
all-cause	Hungary	women	2000	76.0343
all-cause	Hungary	women	2001	76.5629
all-cause	Hungary	women	2002	76.6857
all-cause	Hungary	women	2003	76.6643
all-cause	Hungary	women	2004	77.1029
all-cause	Hungary	women	2005	77.0756
all-cause	Hungary	women	2006	77.5634
all-cause	Hungary	women	2007	77.537
all-cause	Hungary	women	2008	77.9901
all-cause	Hungary	women	2009	78.1327
all-cause	Hungary	women	2010	78.3292
all-cause	Hungary	women	2011	78.499
all-cause	Hungary	women	2012	78.622
all-cause	Hungary	women	2013	79.004
all-cause	Hungary	women	2014	79.2467
non-smoking	Hungary	women	1955	68.9739
non-smoking	Hungary	women	1956	68.6123
non-smoking	Hungary	women	1957	68.7795
non-smoking	Hungary	women	1958	69.7636
non-smoking	Hungary	women	1959	69.8178
non-smoking	Hungary	women	1960	70.4829
non-smoking	Hungary	women	1961	71.5139
non-smoking	Hungary	women	1962	70.5073
non-smoking	Hungary	women	1963	71.5871
non-smoking	Hungary	women	1964	72.3198
non-smoking	Hungary	women	1965	71.9569
non-smoking	Hungary	women	1966	72.6676
non-smoking	Hungary	women	1967	72.4286
non-smoking	Hungary	women	1968	72.4416
non-smoking	Hungary	women	1969	72.4719
non-smoking	Hungary	women	1970	72.5776
non-smoking	Hungary	women	1971	72.5694
non-smoking	Hungary	women	1972	73.1036
non-smoking	Hungary	women	1973	73.1741
non-smoking	Hungary	women	1974	72.8363
non-smoking	Hungary	women	1975	73.0517
non-smoking	Hungary	women	1976	73.257
non-smoking	Hungary	women	1977	73.7146
non-smoking	Hungary	women	1978	73.6167
non-smoking	Hungary	women	1979	73.9098
non-smoking	Hungary	women	1980	73.6129
non-smoking	Hungary	women	1981	73.733
non-smoking	Hungary	women	1982	74.1067
non-smoking	Hungary	women	1983	73.9629
non-smoking	Hungary	women	1984	74.1322
non-smoking	Hungary	women	1985	74.0308
non-smoking	Hungary	women	1986	74.3104
non-smoking	Hungary	women	1987	74.9546
non-smoking	Hungary	women	1988	75.2188
non-smoking	Hungary	women	1989	75.1021
non-smoking	Hungary	women	1990	75.2427
non-smoking	Hungary	women	1991	75.4452
non-smoking	Hungary	women	1992	75.5557
non-smoking	Hungary	women	1993	75.744
non-smoking	Hungary	women	1994	76.1529
non-smoking	Hungary	women	1995	76.5309
non-smoking	Hungary	women	1996	76.8531
non-smoking	Hungary	women	1997	77.2993
non-smoking	Hungary	women	1998	77.3809
non-smoking	Hungary	women	1999	77.4218
non-smoking	Hungary	women	2000	77.952
non-smoking	Hungary	women	2001	78.5148
non-smoking	Hungary	women	2002	78.6748
non-smoking	Hungary	women	2003	78.7234
non-smoking	Hungary	women	2004	79.2258
non-smoking	Hungary	women	2005	79.0062
non-smoking	Hungary	women	2006	79.5425
non-smoking	Hungary	women	2007	79.7311
non-smoking	Hungary	women	2008	80.2664
non-smoking	Hungary	women	2009	80.4465
non-smoking	Hungary	women	2010	80.6715
non-smoking	Hungary	women	2011	80.8899
non-smoking	Hungary	women	2012	81.0672
non-smoking	Hungary	women	2013	81.4367
non-smoking	Hungary	women	2014	81.7501
non-alcohol	Hungary	women	1990	74.4995
non-alcohol	Hungary	women	1991	74.7135
non-alcohol	Hungary	women	1992	74.7202
non-alcohol	Hungary	women	1993	74.7892
non-alcohol	Hungary	women	1994	75.2566
non-alcohol	Hungary	women	1995	75.5064
non-alcohol	Hungary	women	1996	75.7292
non-alcohol	Hungary	women	1997	76.1777
non-alcohol	Hungary	women	1998	76.2475
non-alcohol	Hungary	women	1999	76.1938
non-alcohol	Hungary	women	2000	76.6949
non-alcohol	Hungary	women	2001	77.1996
non-alcohol	Hungary	women	2002	77.307
non-alcohol	Hungary	women	2003	77.2761
non-alcohol	Hungary	women	2004	77.6987
non-alcohol	Hungary	women	2005	77.6525
non-alcohol	Hungary	women	2006	78.1244
non-alcohol	Hungary	women	2007	78.0855
non-alcohol	Hungary	women	2008	78.5011
non-alcohol	Hungary	women	2009	78.6104
non-alcohol	Hungary	women	2010	78.775
non-alcohol	Hungary	women	2011	78.9289
non-alcohol	Hungary	women	2012	79.0324
non-alcohol	Hungary	women	2013	79.3997
non-alcohol	Hungary	women	2014	79.6342
non-obesity	Hungary	women	1975	73.3135
non-obesity	Hungary	women	1976	73.4402
non-obesity	Hungary	women	1977	73.9605
non-obesity	Hungary	women	1978	73.7002
non-obesity	Hungary	women	1979	74.0714
non-obesity	Hungary	women	1980	73.6716
non-obesity	Hungary	women	1981	73.8673
non-obesity	Hungary	women	1982	74.138
non-obesity	Hungary	women	1983	73.928
non-obesity	Hungary	women	1984	74.1033
non-obesity	Hungary	women	1985	73.9862
non-obesity	Hungary	women	1986	74.1533
non-obesity	Hungary	women	1987	74.7025
non-obesity	Hungary	women	1988	74.9968
non-obesity	Hungary	women	1989	74.7581
non-obesity	Hungary	women	1990	74.8207
non-obesity	Hungary	women	1991	75.0272
non-obesity	Hungary	women	1992	75.018
non-obesity	Hungary	women	1993	75.0797
non-obesity	Hungary	women	1994	75.5576
non-obesity	Hungary	women	1995	75.8217
non-obesity	Hungary	women	1996	76.0744
non-obesity	Hungary	women	1997	76.5413
non-obesity	Hungary	women	1998	76.6214
non-obesity	Hungary	women	1999	76.5953
non-obesity	Hungary	women	2000	77.1284
non-obesity	Hungary	women	2001	77.656
non-obesity	Hungary	women	2002	77.7825
non-obesity	Hungary	women	2003	77.7672
non-obesity	Hungary	women	2004	78.2185
non-obesity	Hungary	women	2005	78.194
non-obesity	Hungary	women	2006	78.6925
non-obesity	Hungary	women	2007	78.6821
non-obesity	Hungary	women	2008	79.1357
non-obesity	Hungary	women	2009	79.2909
non-obesity	Hungary	women	2010	79.4778
non-obesity	Hungary	women	2011	79.6631
non-obesity	Hungary	women	2012	79.7824
non-obesity	Hungary	women	2013	80.1702
non-obesity	Hungary	women	2014	80.4321
non-lifestyle combined	Hungary	women	1990	76.8439
non-lifestyle combined	Hungary	women	1991	77.0605
non-lifestyle combined	Hungary	women	1992	77.2063
non-lifestyle combined	Hungary	women	1993	77.4218
non-lifestyle combined	Hungary	women	1994	77.8227
non-lifestyle combined	Hungary	women	1995	78.1749
non-lifestyle combined	Hungary	women	1996	78.4189
non-lifestyle combined	Hungary	women	1997	78.878
non-lifestyle combined	Hungary	women	1998	78.9449
non-lifestyle combined	Hungary	women	1999	78.9646
non-lifestyle combined	Hungary	women	2000	79.4482
non-lifestyle combined	Hungary	women	2001	79.986
non-lifestyle combined	Hungary	women	2002	80.1321
non-lifestyle combined	Hungary	women	2003	80.1691
non-lifestyle combined	Hungary	women	2004	80.6641
non-lifestyle combined	Hungary	women	2005	80.4272
non-lifestyle combined	Hungary	women	2006	80.951
non-lifestyle combined	Hungary	women	2007	81.1192
non-lifestyle combined	Hungary	women	2008	81.6216
non-lifestyle combined	Hungary	women	2009	81.782
non-lifestyle combined	Hungary	women	2010	81.9708
non-lifestyle combined	Hungary	women	2011	82.1922
non-lifestyle combined	Hungary	women	2012	82.351
non-lifestyle combined	Hungary	women	2013	82.7133
non-lifestyle combined	Hungary	women	2014	83.0318
all-cause	Ireland	women	1950	66.7172
all-cause	Ireland	women	1951	66.0933
all-cause	Ireland	women	1952	68.6757
all-cause	Ireland	women	1953	69.207
all-cause	Ireland	women	1954	69.703
all-cause	Ireland	women	1955	69.6407
all-cause	Ireland	women	1956	70.7165
all-cause	Ireland	women	1957	70.6336
all-cause	Ireland	women	1958	71.1342
all-cause	Ireland	women	1959	71.4101
all-cause	Ireland	women	1960	71.9785
all-cause	Ireland	women	1961	71.5891
all-cause	Ireland	women	1962	72.0964
all-cause	Ireland	women	1963	72.2533
all-cause	Ireland	women	1964	72.5823
all-cause	Ireland	women	1965	72.9346
all-cause	Ireland	women	1966	72.4353
all-cause	Ireland	women	1967	73.5174
all-cause	Ireland	women	1968	73.2642
all-cause	Ireland	women	1969	73.0786
all-cause	Ireland	women	1970	73.3273
all-cause	Ireland	women	1971	74.1806
all-cause	Ireland	women	1972	73.5685
all-cause	Ireland	women	1973	73.8805
all-cause	Ireland	women	1974	73.8354
all-cause	Ireland	women	1975	74.467
all-cause	Ireland	women	1976	74.4722
all-cause	Ireland	women	1977	74.6276
all-cause	Ireland	women	1978	74.7762
all-cause	Ireland	women	1979	75.2851
all-cause	Ireland	women	1980	75.3779
all-cause	Ireland	women	1981	75.8792
all-cause	Ireland	women	1982	76.0846
all-cause	Ireland	women	1983	76.2116
all-cause	Ireland	women	1984	76.5638
all-cause	Ireland	women	1985	76.6296
all-cause	Ireland	women	1986	76.6186
all-cause	Ireland	women	1987	77.3614
all-cause	Ireland	women	1988	77.3283
all-cause	Ireland	women	1989	77.3048
all-cause	Ireland	women	1990	77.7142
all-cause	Ireland	women	1991	77.9069
all-cause	Ireland	women	1992	78.29
all-cause	Ireland	women	1993	78.1677
all-cause	Ireland	women	1994	78.6519
all-cause	Ireland	women	1995	78.3232
all-cause	Ireland	women	1996	78.7264
all-cause	Ireland	women	1997	78.7027
all-cause	Ireland	women	1998	79.099
all-cause	Ireland	women	1999	78.8615
all-cause	Ireland	women	2000	79.2017
all-cause	Ireland	women	2001	79.7804
all-cause	Ireland	women	2002	80.3054
all-cause	Ireland	women	2003	80.5858
all-cause	Ireland	women	2004	81.0089
all-cause	Ireland	women	2005	81.4316
all-cause	Ireland	women	2006	81.5564
all-cause	Ireland	women	2007	81.8588
all-cause	Ireland	women	2008	82.0607
all-cause	Ireland	women	2009	82.4199
all-cause	Ireland	women	2010	82.7767
all-cause	Ireland	women	2011	82.7847
all-cause	Ireland	women	2012	82.8709
all-cause	Ireland	women	2013	82.8119
all-cause	Ireland	women	2014	83.2371
non-smoking	Ireland	women	1950	66.7755
non-smoking	Ireland	women	1951	66.1903
non-smoking	Ireland	women	1952	68.8757
non-smoking	Ireland	women	1953	69.4414
non-smoking	Ireland	women	1954	70.0815
non-smoking	Ireland	women	1955	69.9976
non-smoking	Ireland	women	1956	70.9119
non-smoking	Ireland	women	1957	71.1319
non-smoking	Ireland	women	1958	71.4436
non-smoking	Ireland	women	1959	71.5942
non-smoking	Ireland	women	1960	72.3851
non-smoking	Ireland	women	1961	71.9336
non-smoking	Ireland	women	1962	72.6244
non-smoking	Ireland	women	1963	72.6289
non-smoking	Ireland	women	1964	73.0105
non-smoking	Ireland	women	1965	73.4688
non-smoking	Ireland	women	1966	72.9858
non-smoking	Ireland	women	1967	74.1609
non-smoking	Ireland	women	1968	74.03
non-smoking	Ireland	women	1969	73.7837
non-smoking	Ireland	women	1970	74.2046
non-smoking	Ireland	women	1971	75.2058
non-smoking	Ireland	women	1972	74.6491
non-smoking	Ireland	women	1973	74.8203
non-smoking	Ireland	women	1974	75.2255
non-smoking	Ireland	women	1975	75.7536
non-smoking	Ireland	women	1976	75.6949
non-smoking	Ireland	women	1977	75.9297
non-smoking	Ireland	women	1978	76.1101
non-smoking	Ireland	women	1979	76.7155
non-smoking	Ireland	women	1980	76.8188
non-smoking	Ireland	women	1981	77.426
non-smoking	Ireland	women	1982	77.6162
non-smoking	Ireland	women	1983	77.9825
non-smoking	Ireland	women	1984	78.364
non-smoking	Ireland	women	1985	78.3252
non-smoking	Ireland	women	1986	78.3267
non-smoking	Ireland	women	1987	78.9656
non-smoking	Ireland	women	1988	79.1994
non-smoking	Ireland	women	1989	79.3427
non-smoking	Ireland	women	1990	79.496
non-smoking	Ireland	women	1991	79.5553
non-smoking	Ireland	women	1992	80.0999
non-smoking	Ireland	women	1993	79.9169
non-smoking	Ireland	women	1994	80.4489
non-smoking	Ireland	women	1995	80.1495
non-smoking	Ireland	women	1996	80.3735
non-smoking	Ireland	women	1997	80.3043
non-smoking	Ireland	women	1998	80.846
non-smoking	Ireland	women	1999	80.5015
non-smoking	Ireland	women	2000	81.0233
non-smoking	Ireland	women	2001	81.4129
non-smoking	Ireland	women	2002	81.8785
non-smoking	Ireland	women	2003	82.2858
non-smoking	Ireland	women	2004	82.7592
non-smoking	Ireland	women	2005	83.2158
non-smoking	Ireland	women	2006	83.3001
non-smoking	Ireland	women	2007	83.571
non-smoking	Ireland	women	2008	83.7942
non-smoking	Ireland	women	2009	84.138
non-smoking	Ireland	women	2010	84.4401
non-smoking	Ireland	women	2011	84.5578
non-smoking	Ireland	women	2012	84.5285
non-smoking	Ireland	women	2013	84.4782
non-smoking	Ireland	women	2014	85.127
non-alcohol	Ireland	women	1990	78.0049
non-alcohol	Ireland	women	1991	78.2041
non-alcohol	Ireland	women	1992	78.6097
non-alcohol	Ireland	women	1993	78.4921
non-alcohol	Ireland	women	1994	78.9996
non-alcohol	Ireland	women	1995	78.6857
non-alcohol	Ireland	women	1996	79.0937
non-alcohol	Ireland	women	1997	79.1049
non-alcohol	Ireland	women	1998	79.5129
non-alcohol	Ireland	women	1999	79.2876
non-alcohol	Ireland	women	2000	79.6431
non-alcohol	Ireland	women	2001	80.2082
non-alcohol	Ireland	women	2002	80.7097
non-alcohol	Ireland	women	2003	80.9977
non-alcohol	Ireland	women	2004	81.4222
non-alcohol	Ireland	women	2005	81.8396
non-alcohol	Ireland	women	2006	81.9552
non-alcohol	Ireland	women	2007	82.2346
non-alcohol	Ireland	women	2008	82.4475
non-alcohol	Ireland	women	2009	82.797
non-alcohol	Ireland	women	2010	83.121
non-alcohol	Ireland	women	2011	83.1252
non-alcohol	Ireland	women	2012	83.2045
non-alcohol	Ireland	women	2013	83.118
non-alcohol	Ireland	women	2014	83.5333
non-obesity	Ireland	women	1975	74.8868
non-obesity	Ireland	women	1976	74.9007
non-obesity	Ireland	women	1977	75.0731
non-obesity	Ireland	women	1978	75.2349
non-obesity	Ireland	women	1979	75.7606
non-obesity	Ireland	women	1980	75.8723
non-obesity	Ireland	women	1981	76.383
non-obesity	Ireland	women	1982	76.6067
non-obesity	Ireland	women	1983	76.7435
non-obesity	Ireland	women	1984	77.1171
non-obesity	Ireland	women	1985	77.1899
non-obesity	Ireland	women	1986	77.1935
non-obesity	Ireland	women	1987	77.9523
non-obesity	Ireland	women	1988	77.9346
non-obesity	Ireland	women	1989	77.9267
non-obesity	Ireland	women	1990	78.3479
non-obesity	Ireland	women	1991	78.5527
[truncated: 1,706 more rows]
