# Supplementary material for: Future life expectancy in Europe taking into account the impact of smoking, obesity, and alcohol
Source: eLife. 2021 Jul 6;10:e66590. doi: 10.7554/eLife.66590 (PMC8337079; doi:10.7554/eLife.66590)
Supplement: Figure 2—source data 1. [file elife-66590-fig2-data1.xlsx]

## Sheet: data
lifestyle	country	sex	year	e0
all-cause	Austria	men	1955	64.5234
all-cause	Austria	men	1956	64.5964
all-cause	Austria	men	1957	64.1707
all-cause	Austria	men	1958	65.3045
all-cause	Austria	men	1959	65.1577
all-cause	Austria	men	1960	65.3602
all-cause	Austria	men	1961	66.3849
all-cause	Austria	men	1962	66.2628
all-cause	Austria	men	1963	66.3851
all-cause	Austria	men	1964	66.7645
all-cause	Austria	men	1965	66.5934
all-cause	Austria	men	1966	66.8267
all-cause	Austria	men	1967	66.608
all-cause	Austria	men	1968	66.7471
all-cause	Austria	men	1969	66.5536
all-cause	Austria	men	1970	66.4949
all-cause	Austria	men	1971	66.6471
all-cause	Austria	men	1972	66.9376
all-cause	Austria	men	1973	67.527
all-cause	Austria	men	1974	67.437
all-cause	Austria	men	1975	67.6512
all-cause	Austria	men	1976	68.1901
all-cause	Austria	men	1977	68.4935
all-cause	Austria	men	1978	68.4381
all-cause	Austria	men	1979	68.7748
all-cause	Austria	men	1980	68.9519
all-cause	Austria	men	1981	69.2564
all-cause	Austria	men	1982	69.3679
all-cause	Austria	men	1983	69.4985
all-cause	Austria	men	1984	70.0058
all-cause	Austria	men	1985	70.3232
all-cause	Austria	men	1986	70.8914
all-cause	Austria	men	1987	71.3892
all-cause	Austria	men	1988	71.8491
all-cause	Austria	men	1989	71.8982
all-cause	Austria	men	1990	72.2282
all-cause	Austria	men	1991	72.2652
all-cause	Austria	men	1992	72.5087
all-cause	Austria	men	1993	72.7626
all-cause	Austria	men	1994	73.1176
all-cause	Austria	men	1995	73.2968
all-cause	Austria	men	1996	73.662
all-cause	Austria	men	1997	74.0183
all-cause	Austria	men	1998	74.4433
all-cause	Austria	men	1999	74.7784
all-cause	Austria	men	2000	75.0968
all-cause	Austria	men	2001	75.5911
all-cause	Austria	men	2002	75.7765
all-cause	Austria	men	2003	75.9151
all-cause	Austria	men	2004	76.3919
all-cause	Austria	men	2005	76.6205
all-cause	Austria	men	2006	77.0764
all-cause	Austria	men	2007	77.2917
all-cause	Austria	men	2008	77.5866
all-cause	Austria	men	2009	77.3988
all-cause	Austria	men	2010	77.6589
all-cause	Austria	men	2011	78.0812
all-cause	Austria	men	2012	78.2619
all-cause	Austria	men	2013	78.4601
all-cause	Austria	men	2014	78.9185
non-smoking	Austria	men	1955	68.1536
non-smoking	Austria	men	1956	68.4809
non-smoking	Austria	men	1957	68.1106
non-smoking	Austria	men	1958	69.1076
non-smoking	Austria	men	1959	69.0609
non-smoking	Austria	men	1960	69.2143
non-smoking	Austria	men	1961	70.3964
non-smoking	Austria	men	1962	70.0951
non-smoking	Austria	men	1963	70.4398
non-smoking	Austria	men	1964	70.6949
non-smoking	Austria	men	1965	70.706
non-smoking	Austria	men	1966	70.8326
non-smoking	Austria	men	1967	70.5513
non-smoking	Austria	men	1968	70.8386
non-smoking	Austria	men	1969	70.6678
non-smoking	Austria	men	1970	70.4967
non-smoking	Austria	men	1971	70.5788
non-smoking	Austria	men	1972	71.0092
non-smoking	Austria	men	1973	71.571
non-smoking	Austria	men	1974	71.4656
non-smoking	Austria	men	1975	71.652
non-smoking	Austria	men	1976	72.2223
non-smoking	Austria	men	1977	72.5274
non-smoking	Austria	men	1978	72.3433
non-smoking	Austria	men	1979	72.9041
non-smoking	Austria	men	1980	72.9075
non-smoking	Austria	men	1981	73.1803
non-smoking	Austria	men	1982	73.1537
non-smoking	Austria	men	1983	73.4127
non-smoking	Austria	men	1984	74.0499
non-smoking	Austria	men	1985	74.1359
non-smoking	Austria	men	1986	74.6915
non-smoking	Austria	men	1987	75.082
non-smoking	Austria	men	1988	75.55
non-smoking	Austria	men	1989	75.5949
non-smoking	Austria	men	1990	75.9067
non-smoking	Austria	men	1991	75.9873
non-smoking	Austria	men	1992	76.0527
non-smoking	Austria	men	1993	76.3896
non-smoking	Austria	men	1994	76.5021
non-smoking	Austria	men	1995	76.5918
non-smoking	Austria	men	1996	76.953
non-smoking	Austria	men	1997	77.1864
non-smoking	Austria	men	1998	77.5827
non-smoking	Austria	men	1999	77.6896
non-smoking	Austria	men	2000	77.9412
non-smoking	Austria	men	2001	78.3268
non-smoking	Austria	men	2002	78.512
non-smoking	Austria	men	2003	78.5003
non-smoking	Austria	men	2004	78.9091
non-smoking	Austria	men	2005	79.0826
non-smoking	Austria	men	2006	79.4935
non-smoking	Austria	men	2007	79.5367
non-smoking	Austria	men	2008	79.8505
non-smoking	Austria	men	2009	79.6786
non-smoking	Austria	men	2010	79.879
non-smoking	Austria	men	2011	80.2094
non-smoking	Austria	men	2012	80.3273
non-smoking	Austria	men	2013	80.5596
non-smoking	Austria	men	2014	80.9499
non-alcohol	Austria	men	1990	73.818
non-alcohol	Austria	men	1991	73.8884
non-alcohol	Austria	men	1992	74.1103
non-alcohol	Austria	men	1993	74.3518
non-alcohol	Austria	men	1994	74.6972
non-alcohol	Austria	men	1995	74.8688
non-alcohol	Austria	men	1996	75.2032
non-alcohol	Austria	men	1997	75.4935
non-alcohol	Austria	men	1998	75.8725
non-alcohol	Austria	men	1999	76.1648
non-alcohol	Austria	men	2000	76.4899
non-alcohol	Austria	men	2001	76.9579
non-alcohol	Austria	men	2002	77.1284
non-alcohol	Austria	men	2003	77.2448
non-alcohol	Austria	men	2004	77.7387
non-alcohol	Austria	men	2005	77.9421
non-alcohol	Austria	men	2006	78.3546
non-alcohol	Austria	men	2007	78.5509
non-alcohol	Austria	men	2008	78.8103
non-alcohol	Austria	men	2009	78.6429
non-alcohol	Austria	men	2010	78.8871
non-alcohol	Austria	men	2011	79.2682
non-alcohol	Austria	men	2012	79.4178
non-alcohol	Austria	men	2013	79.5884
non-alcohol	Austria	men	2014	80.0302
non-obesity	Austria	men	1975	68.0331
non-obesity	Austria	men	1976	68.5863
non-obesity	Austria	men	1977	68.9069
non-obesity	Austria	men	1978	68.8633
non-obesity	Austria	men	1979	69.2192
non-obesity	Austria	men	1980	69.4088
non-obesity	Austria	men	1981	69.7276
non-obesity	Austria	men	1982	69.8585
non-obesity	Austria	men	1983	70.0062
non-obesity	Austria	men	1984	70.5326
non-obesity	Austria	men	1985	70.8564
non-obesity	Austria	men	1986	71.4424
non-obesity	Austria	men	1987	71.9572
non-obesity	Austria	men	1988	72.431
non-obesity	Austria	men	1989	72.498
non-obesity	Austria	men	1990	72.848
non-obesity	Austria	men	1991	72.9075
non-obesity	Austria	men	1992	73.1682
non-obesity	Austria	men	1993	73.438
non-obesity	Austria	men	1994	73.8152
non-obesity	Austria	men	1995	74.0148
non-obesity	Austria	men	1996	74.3969
non-obesity	Austria	men	1997	74.7626
non-obesity	Austria	men	1998	75.2022
non-obesity	Austria	men	1999	75.5534
non-obesity	Austria	men	2000	75.8903
non-obesity	Austria	men	2001	76.3969
non-obesity	Austria	men	2002	76.5945
non-obesity	Austria	men	2003	76.7511
non-obesity	Austria	men	2004	77.2466
non-obesity	Austria	men	2005	77.4899
non-obesity	Austria	men	2006	77.9494
non-obesity	Austria	men	2007	78.1895
non-obesity	Austria	men	2008	78.488
non-obesity	Austria	men	2009	78.3417
non-obesity	Austria	men	2010	78.6186
non-obesity	Austria	men	2011	79.049
non-obesity	Austria	men	2012	79.2447
non-obesity	Austria	men	2013	79.4553
non-obesity	Austria	men	2014	79.9321
non-lifestyle combined	Austria	men	1990	77.6004
non-lifestyle combined	Austria	men	1991	77.7057
non-lifestyle combined	Austria	men	1992	77.7899
non-lifestyle combined	Austria	men	1993	78.1119
non-lifestyle combined	Austria	men	1994	78.263
non-lifestyle combined	Austria	men	1995	78.3745
non-lifestyle combined	Austria	men	1996	78.7132
non-lifestyle combined	Austria	men	1997	78.9062
non-lifestyle combined	Austria	men	1998	79.2666
non-lifestyle combined	Austria	men	1999	79.3804
non-lifestyle combined	Austria	men	2000	79.644
non-lifestyle combined	Austria	men	2001	80.0121
non-lifestyle combined	Austria	men	2002	80.2022
non-lifestyle combined	Austria	men	2003	80.2218
non-lifestyle combined	Austria	men	2004	80.6492
non-lifestyle combined	Austria	men	2005	80.8167
non-lifestyle combined	Austria	men	2006	81.1955
non-lifestyle combined	Austria	men	2007	81.2671
non-lifestyle combined	Austria	men	2008	81.5464
non-lifestyle combined	Austria	men	2009	81.4386
non-lifestyle combined	Austria	men	2010	81.6364
non-lifestyle combined	Austria	men	2011	81.9496
non-lifestyle combined	Austria	men	2012	82.0647
non-lifestyle combined	Austria	men	2013	82.2725
non-lifestyle combined	Austria	men	2014	82.679
all-cause	Belgium	men	1954	66.0783
all-cause	Belgium	men	1955	65.8952
all-cause	Belgium	men	1956	66.1079
all-cause	Belgium	men	1957	66.5273
all-cause	Belgium	men	1958	67.2695
all-cause	Belgium	men	1959	67.5883
all-cause	Belgium	men	1960	66.6892
all-cause	Belgium	men	1961	67.5307
all-cause	Belgium	men	1962	67.3812
all-cause	Belgium	men	1963	67.0791
all-cause	Belgium	men	1964	67.6918
all-cause	Belgium	men	1965	67.556
all-cause	Belgium	men	1966	67.661
all-cause	Belgium	men	1967	67.83
all-cause	Belgium	men	1968	67.5382
all-cause	Belgium	men	1969	67.4852
all-cause	Belgium	men	1970	67.811
all-cause	Belgium	men	1971	67.888
all-cause	Belgium	men	1972	68.1948
all-cause	Belgium	men	1973	68.421
all-cause	Belgium	men	1974	68.765
all-cause	Belgium	men	1975	68.7776
all-cause	Belgium	men	1976	68.8624
all-cause	Belgium	men	1977	69.4856
all-cause	Belgium	men	1978	69.3917
all-cause	Belgium	men	1979	69.9082
all-cause	Belgium	men	1980	69.8689
all-cause	Belgium	men	1981	70.2763
all-cause	Belgium	men	1982	70.5908
all-cause	Belgium	men	1983	70.6063
all-cause	Belgium	men	1984	70.9528
all-cause	Belgium	men	1985	71.0719
all-cause	Belgium	men	1986	71.3297
all-cause	Belgium	men	1987	71.9054
all-cause	Belgium	men	1988	72.2202
all-cause	Belgium	men	1989	72.3172
all-cause	Belgium	men	1990	72.6982
all-cause	Belgium	men	1991	72.848
all-cause	Belgium	men	1992	72.9758
all-cause	Belgium	men	1993	72.9424
all-cause	Belgium	men	1994	73.3513
all-cause	Belgium	men	1995	73.4342
all-cause	Belgium	men	1996	73.8325
all-cause	Belgium	men	1997	74.1588
all-cause	Belgium	men	1998	74.298
all-cause	Belgium	men	1999	74.3657
all-cause	Belgium	men	2000	74.5672
all-cause	Belgium	men	2001	74.9201
all-cause	Belgium	men	2002	75.0815
all-cause	Belgium	men	2003	75.3609
all-cause	Belgium	men	2004	75.9718
all-cause	Belgium	men	2005	76.1467
all-cause	Belgium	men	2006	76.5215
all-cause	Belgium	men	2007	76.74
all-cause	Belgium	men	2008	76.7718
all-cause	Belgium	men	2009	77.1634
all-cause	Belgium	men	2010	77.3776
all-cause	Belgium	men	2011	77.7683
all-cause	Belgium	men	2012	77.6345
all-cause	Belgium	men	2013	77.9508
all-cause	Belgium	men	2014	78.5765
non-smoking	Belgium	men	1954	68.8265
non-smoking	Belgium	men	1955	68.668
non-smoking	Belgium	men	1956	69.1403
non-smoking	Belgium	men	1957	69.6266
non-smoking	Belgium	men	1958	70.426
non-smoking	Belgium	men	1959	70.8119
non-smoking	Belgium	men	1960	70.2556
non-smoking	Belgium	men	1961	71.1733
non-smoking	Belgium	men	1962	71.1557
non-smoking	Belgium	men	1963	71.0451
non-smoking	Belgium	men	1964	71.7481
non-smoking	Belgium	men	1965	71.8736
non-smoking	Belgium	men	1966	71.9207
non-smoking	Belgium	men	1967	72.2611
non-smoking	Belgium	men	1968	72.0038
non-smoking	Belgium	men	1969	71.9672
non-smoking	Belgium	men	1970	72.5127
non-smoking	Belgium	men	1971	72.8416
non-smoking	Belgium	men	1972	73.2631
non-smoking	Belgium	men	1973	73.4492
non-smoking	Belgium	men	1974	73.7531
non-smoking	Belgium	men	1975	73.7875
non-smoking	Belgium	men	1976	73.9996
non-smoking	Belgium	men	1977	74.8776
non-smoking	Belgium	men	1978	74.7764
non-smoking	Belgium	men	1979	75.2776
non-smoking	Belgium	men	1980	75.252
non-smoking	Belgium	men	1981	75.6367
non-smoking	Belgium	men	1982	75.9059
non-smoking	Belgium	men	1983	75.9831
non-smoking	Belgium	men	1984	76.2988
non-smoking	Belgium	men	1985	76.4408
non-smoking	Belgium	men	1986	76.5201
non-smoking	Belgium	men	1987	77.0782
non-smoking	Belgium	men	1988	77.3598
non-smoking	Belgium	men	1989	77.1625
non-smoking	Belgium	men	1990	77.4919
non-smoking	Belgium	men	1991	77.5626
non-smoking	Belgium	men	1992	77.725
non-smoking	Belgium	men	1993	77.6363
non-smoking	Belgium	men	1994	77.9333
non-smoking	Belgium	men	1995	78.128
non-smoking	Belgium	men	1996	78.2378
non-smoking	Belgium	men	1997	78.5642
non-smoking	Belgium	men	1998	78.4619
non-smoking	Belgium	men	1999	78.3833
non-smoking	Belgium	men	2000	78.4383
non-smoking	Belgium	men	2001	78.863
non-smoking	Belgium	men	2002	78.8638
non-smoking	Belgium	men	2003	78.9722
non-smoking	Belgium	men	2004	79.3856
non-smoking	Belgium	men	2005	79.6232
non-smoking	Belgium	men	2006	79.9321
non-smoking	Belgium	men	2007	79.9814
non-smoking	Belgium	men	2008	80.062
non-smoking	Belgium	men	2009	80.3259
non-smoking	Belgium	men	2010	80.5347
non-smoking	Belgium	men	2011	80.6978
non-smoking	Belgium	men	2012	80.4356
non-smoking	Belgium	men	2013	80.5834
non-smoking	Belgium	men	2014	81.1557
non-alcohol	Belgium	men	1990	73.5405
non-alcohol	Belgium	men	1991	73.6999
non-alcohol	Belgium	men	1992	73.8275
non-alcohol	Belgium	men	1993	73.794
non-alcohol	Belgium	men	1994	74.2157
non-alcohol	Belgium	men	1995	74.2886
non-alcohol	Belgium	men	1996	74.6671
non-alcohol	Belgium	men	1997	74.9856
non-alcohol	Belgium	men	1998	75.1008
non-alcohol	Belgium	men	1999	75.1739
non-alcohol	Belgium	men	2000	75.3869
non-alcohol	Belgium	men	2001	75.7683
non-alcohol	Belgium	men	2002	75.9654
non-alcohol	Belgium	men	2003	76.2857
non-alcohol	Belgium	men	2004	76.9443
non-alcohol	Belgium	men	2005	77.1513
non-alcohol	Belgium	men	2006	77.5265
non-alcohol	Belgium	men	2007	77.7688
non-alcohol	Belgium	men	2008	77.829
non-alcohol	Belgium	men	2009	78.2168
non-alcohol	Belgium	men	2010	78.4123
non-alcohol	Belgium	men	2011	78.8227
non-alcohol	Belgium	men	2012	78.6781
non-alcohol	Belgium	men	2013	78.9641
non-alcohol	Belgium	men	2014	79.588
non-obesity	Belgium	men	1975	69.3158
non-obesity	Belgium	men	1976	69.4174
non-obesity	Belgium	men	1977	70.0638
non-obesity	Belgium	men	1978	69.9819
non-obesity	Belgium	men	1979	70.5152
non-obesity	Belgium	men	1980	70.489
non-obesity	Belgium	men	1981	70.906
non-obesity	Belgium	men	1982	71.24
non-obesity	Belgium	men	1983	71.2654
non-obesity	Belgium	men	1984	71.6306
non-obesity	Belgium	men	1985	71.7647
non-obesity	Belgium	men	1986	72.0312
non-obesity	Belgium	men	1987	72.6341
non-obesity	Belgium	men	1988	72.9597
non-obesity	Belgium	men	1989	73.0599
non-obesity	Belgium	men	1990	73.4613
non-obesity	Belgium	men	1991	73.6323
non-obesity	Belgium	men	1992	73.7786
non-obesity	Belgium	men	1993	73.7572
non-obesity	Belgium	men	1994	74.1923
non-obesity	Belgium	men	1995	74.2999
non-obesity	Belgium	men	1996	74.7079
non-obesity	Belgium	men	1997	75.0516
non-obesity	Belgium	men	1998	75.2119
non-obesity	Belgium	men	1999	75.3032
non-obesity	Belgium	men	2000	75.5207
non-obesity	Belgium	men	2001	75.8909
non-obesity	Belgium	men	2002	76.0656
non-obesity	Belgium	men	2003	76.3537
non-obesity	Belgium	men	2004	76.9799
non-obesity	Belgium	men	2005	77.1714
non-obesity	Belgium	men	2006	77.5666
non-obesity	Belgium	men	2007	77.7987
non-obesity	Belgium	men	2008	77.8584
non-obesity	Belgium	men	2009	78.2588
non-obesity	Belgium	men	2010	78.4831
non-obesity	Belgium	men	2011	78.8931
non-obesity	Belgium	men	2012	78.7689
non-obesity	Belgium	men	2013	79.096
non-obesity	Belgium	men	2014	79.7375
non-lifestyle combined	Belgium	men	1990	78.7043
non-lifestyle combined	Belgium	men	1991	78.8149
non-lifestyle combined	Belgium	men	1992	78.9701
non-lifestyle combined	Belgium	men	1993	78.8968
non-lifestyle combined	Belgium	men	1994	79.2292
non-lifestyle combined	Belgium	men	1995	79.4186
non-lifestyle combined	Belgium	men	1996	79.5348
non-lifestyle combined	Belgium	men	1997	79.8653
non-lifestyle combined	Belgium	men	1998	79.7813
non-lifestyle combined	Belgium	men	1999	79.726
non-lifestyle combined	Belgium	men	2000	79.822
non-lifestyle combined	Belgium	men	2001	80.2408
non-lifestyle combined	Belgium	men	2002	80.295
non-lifestyle combined	Belgium	men	2003	80.4448
non-lifestyle combined	Belgium	men	2004	80.9298
non-lifestyle combined	Belgium	men	2005	81.1903
non-lifestyle combined	Belgium	men	2006	81.5179
non-lifestyle combined	Belgium	men	2007	81.6119
non-lifestyle combined	Belgium	men	2008	81.7254
non-lifestyle combined	Belgium	men	2009	81.9939
non-lifestyle combined	Belgium	men	2010	82.1939
non-lifestyle combined	Belgium	men	2011	82.433
non-lifestyle combined	Belgium	men	2012	82.163
non-lifestyle combined	Belgium	men	2013	82.3375
non-lifestyle combined	Belgium	men	2014	82.9252
all-cause	Czech Republic	men	1953	65.1062
all-cause	Czech Republic	men	1954	65.4595
all-cause	Czech Republic	men	1955	66.3185
all-cause	Czech Republic	men	1956	66.6798
all-cause	Czech Republic	men	1957	66.299
all-cause	Czech Republic	men	1958	67.2194
all-cause	Czech Republic	men	1959	67.0283
all-cause	Czech Republic	men	1960	67.4822
all-cause	Czech Republic	men	1961	67.6086
all-cause	Czech Republic	men	1962	66.8608
all-cause	Czech Republic	men	1963	67.2494
all-cause	Czech Republic	men	1964	67.4581
all-cause	Czech Republic	men	1965	67.0735
all-cause	Czech Republic	men	1966	67.1403
all-cause	Czech Republic	men	1967	67.0199
all-cause	Czech Republic	men	1968	66.4526
all-cause	Czech Republic	men	1969	65.8364
all-cause	Czech Republic	men	1970	66.0309
all-cause	Czech Republic	men	1971	66.1545
all-cause	Czech Republic	men	1972	66.8012
all-cause	Czech Republic	men	1973	66.522
all-cause	Czech Republic	men	1974	66.7609
all-cause	Czech Republic	men	1975	66.9884
all-cause	Czech Republic	men	1976	67.0338
all-cause	Czech Republic	men	1977	67.1
all-cause	Czech Republic	men	1978	67.1865
all-cause	Czech Republic	men	1979	67.3226
all-cause	Czech Republic	men	1980	66.8093
all-cause	Czech Republic	men	1981	67.1903
all-cause	Czech Republic	men	1982	67.3187
all-cause	Czech Republic	men	1983	67.0396
all-cause	Czech Republic	men	1984	67.335
all-cause	Czech Republic	men	1985	67.4939
all-cause	Czech Republic	men	1986	67.4843
all-cause	Czech Republic	men	1987	67.864
all-cause	Czech Republic	men	1988	68.1051
all-cause	Czech Republic	men	1989	68.118
all-cause	Czech Republic	men	1990	67.5332
all-cause	Czech Republic	men	1991	68.2346
all-cause	Czech Republic	men	1992	68.5238
all-cause	Czech Republic	men	1993	69.2498
all-cause	Czech Republic	men	1994	69.4915
all-cause	Czech Republic	men	1995	69.6669
all-cause	Czech Republic	men	1996	70.3079
all-cause	Czech Republic	men	1997	70.424
all-cause	Czech Republic	men	1998	71.0506
all-cause	Czech Republic	men	1999	71.3353
all-cause	Czech Republic	men	2000	71.5542
all-cause	Czech Republic	men	2001	72.0265
all-cause	Czech Republic	men	2002	72.1047
all-cause	Czech Republic	men	2003	72.0871
all-cause	Czech Republic	men	2004	72.615
all-cause	Czech Republic	men	2005	72.9539
all-cause	Czech Republic	men	2006	73.4785
all-cause	Czech Republic	men	2007	73.7028
all-cause	Czech Republic	men	2008	73.97
all-cause	Czech Republic	men	2009	74.162
all-cause	Czech Republic	men	2010	74.4357
all-cause	Czech Republic	men	2011	74.7221
all-cause	Czech Republic	men	2012	74.9679
all-cause	Czech Republic	men	2013	75.1503
all-cause	Czech Republic	men	2014	75.72
non-smoking	Czech Republic	men	1953	67.9427
non-smoking	Czech Republic	men	1954	68.5569
non-smoking	Czech Republic	men	1955	69.6956
non-smoking	Czech Republic	men	1956	70.115
non-smoking	Czech Republic	men	1957	69.7808
non-smoking	Czech Republic	men	1958	70.8572
non-smoking	Czech Republic	men	1959	70.7901
non-smoking	Czech Republic	men	1960	71.4873
non-smoking	Czech Republic	men	1961	71.8033
non-smoking	Czech Republic	men	1962	71.1474
non-smoking	Czech Republic	men	1963	71.779
non-smoking	Czech Republic	men	1964	72.0187
non-smoking	Czech Republic	men	1965	71.6979
non-smoking	Czech Republic	men	1966	71.9537
non-smoking	Czech Republic	men	1967	71.9355
non-smoking	Czech Republic	men	1968	71.2808
non-smoking	Czech Republic	men	1969	70.8952
non-smoking	Czech Republic	men	1970	71.15
non-smoking	Czech Republic	men	1971	71.3527
non-smoking	Czech Republic	men	1972	71.9074
non-smoking	Czech Republic	men	1973	71.6244
non-smoking	Czech Republic	men	1974	71.9876
non-smoking	Czech Republic	men	1975	72.2243
non-smoking	Czech Republic	men	1976	72.191
non-smoking	Czech Republic	men	1977	72.3686
non-smoking	Czech Republic	men	1978	72.5294
non-smoking	Czech Republic	men	1979	72.6264
non-smoking	Czech Republic	men	1980	72.1889
non-smoking	Czech Republic	men	1981	72.5693
non-smoking	Czech Republic	men	1982	72.686
non-smoking	Czech Republic	men	1983	72.5399
non-smoking	Czech Republic	men	1984	72.8422
non-smoking	Czech Republic	men	1985	73.0397
non-smoking	Czech Republic	men	1986	73.123
non-smoking	Czech Republic	men	1987	73.4639
non-smoking	Czech Republic	men	1988	73.8073
non-smoking	Czech Republic	men	1989	73.6651
non-smoking	Czech Republic	men	1990	73.2901
non-smoking	Czech Republic	men	1991	73.8206
non-smoking	Czech Republic	men	1992	74.1034
non-smoking	Czech Republic	men	1993	74.6798
non-smoking	Czech Republic	men	1994	74.6861
non-smoking	Czech Republic	men	1995	74.9498
non-smoking	Czech Republic	men	1996	75.4771
non-smoking	Czech Republic	men	1997	75.5662
non-smoking	Czech Republic	men	1998	75.9112
non-smoking	Czech Republic	men	1999	76.1456
non-smoking	Czech Republic	men	2000	76.3719
non-smoking	Czech Republic	men	2001	76.5499
non-smoking	Czech Republic	men	2002	76.5413
non-smoking	Czech Republic	men	2003	76.4827
non-smoking	Czech Republic	men	2004	76.8861
non-smoking	Czech Republic	men	2005	76.9404
non-smoking	Czech Republic	men	2006	77.373
non-smoking	Czech Republic	men	2007	77.4133
non-smoking	Czech Republic	men	2008	77.4467
non-smoking	Czech Republic	men	2009	77.5499
non-smoking	Czech Republic	men	2010	77.8576
non-smoking	Czech Republic	men	2011	77.9719
non-smoking	Czech Republic	men	2012	78.0066
non-smoking	Czech Republic	men	2013	78.0699
non-smoking	Czech Republic	men	2014	78.4176
non-alcohol	Czech Republic	men	1990	68.9883
non-alcohol	Czech Republic	men	1991	69.6494
non-alcohol	Czech Republic	men	1992	69.9355
non-alcohol	Czech Republic	men	1993	70.6313
non-alcohol	Czech Republic	men	1994	70.8858
non-alcohol	Czech Republic	men	1995	71.0479
non-alcohol	Czech Republic	men	1996	71.723
non-alcohol	Czech Republic	men	1997	71.8868
non-alcohol	Czech Republic	men	1998	72.5276
non-alcohol	Czech Republic	men	1999	72.8509
non-alcohol	Czech Republic	men	2000	73.0821
non-alcohol	Czech Republic	men	2001	73.5448
non-alcohol	Czech Republic	men	2002	73.6179
non-alcohol	Czech Republic	men	2003	73.6138
non-alcohol	Czech Republic	men	2004	74.1363
non-alcohol	Czech Republic	men	2005	74.4527
non-alcohol	Czech Republic	men	2006	74.9449
non-alcohol	Czech Republic	men	2007	75.1734
non-alcohol	Czech Republic	men	2008	75.4298
non-alcohol	Czech Republic	men	2009	75.5807
non-alcohol	Czech Republic	men	2010	75.8431
non-alcohol	Czech Republic	men	2011	76.1085
non-alcohol	Czech Republic	men	2012	76.3098
non-alcohol	Czech Republic	men	2013	76.4442
non-alcohol	Czech Republic	men	2014	76.9799
non-obesity	Czech Republic	men	1975	67.6155
non-obesity	Czech Republic	men	1976	67.6838
non-obesity	Czech Republic	men	1977	67.7825
non-obesity	Czech Republic	men	1978	67.9035
non-obesity	Czech Republic	men	1979	68.0696
non-obesity	Czech Republic	men	1980	67.5855
non-obesity	Czech Republic	men	1981	67.997
non-obesity	Czech Republic	men	1982	68.1474
non-obesity	Czech Republic	men	1983	67.903
non-obesity	Czech Republic	men	1984	68.2256
non-obesity	Czech Republic	men	1985	68.4089
non-obesity	Czech Republic	men	1986	68.4178
non-obesity	Czech Republic	men	1987	68.8238
non-obesity	Czech Republic	men	1988	69.0899
non-obesity	Czech Republic	men	1989	69.1161
non-obesity	Czech Republic	men	1990	68.5736
non-obesity	Czech Republic	men	1991	69.2807
non-obesity	Czech Republic	men	1992	69.5985
non-obesity	Czech Republic	men	1993	70.3267
non-obesity	Czech Republic	men	1994	70.5898
non-obesity	Czech Republic	men	1995	70.7747
non-obesity	Czech Republic	men	1996	71.4459
non-obesity	Czech Republic	men	1997	71.5813
non-obesity	Czech Republic	men	1998	72.2116
non-obesity	Czech Republic	men	1999	72.511
non-obesity	Czech Republic	men	2000	72.745
non-obesity	Czech Republic	men	2001	73.2286
non-obesity	Czech Republic	men	2002	73.3248
non-obesity	Czech Republic	men	2003	73.3244
non-obesity	Czech Republic	men	2004	73.8723
non-obesity	Czech Republic	men	2005	74.2202
non-obesity	Czech Republic	men	2006	74.7547
non-obesity	Czech Republic	men	2007	75.0093
non-obesity	Czech Republic	men	2008	75.2956
non-obesity	Czech Republic	men	2009	75.4955
non-obesity	Czech Republic	men	2010	75.7875
non-obesity	Czech Republic	men	2011	76.0908
non-obesity	Czech Republic	men	2012	76.344
non-obesity	Czech Republic	men	2013	76.5339
non-obesity	Czech Republic	men	2014	77.1124
non-lifestyle combined	Czech Republic	men	1990	75.0942
non-lifestyle combined	Czech Republic	men	1991	75.5896
non-lifestyle combined	Czech Republic	men	1992	75.8932
non-lifestyle combined	Czech Republic	men	1993	76.4436
non-lifestyle combined	Czech Republic	men	1994	76.4778
non-lifestyle combined	Czech Republic	men	1995	76.7438
non-lifestyle combined	Czech Republic	men	1996	77.3067
non-lifestyle combined	Czech Republic	men	1997	77.4389
non-lifestyle combined	Czech Republic	men	1998	77.8088
non-lifestyle combined	Czech Republic	men	1999	78.0578
non-lifestyle combined	Czech Republic	men	2000	78.3077
non-lifestyle combined	Czech Republic	men	2001	78.5279
non-lifestyle combined	Czech Republic	men	2002	78.5507
non-lifestyle combined	Czech Republic	men	2003	78.5071
non-lifestyle combined	Czech Republic	men	2004	78.9501
non-lifestyle combined	Czech Republic	men	2005	79.0294
non-lifestyle combined	Czech Republic	men	2006	79.4385
non-lifestyle combined	Czech Republic	men	2007	79.5375
non-lifestyle combined	Czech Republic	men	2008	79.6285
non-lifestyle combined	Czech Republic	men	2009	79.7295
non-lifestyle combined	Czech Republic	men	2010	80.018
non-lifestyle combined	Czech Republic	men	2011	80.1637
non-lifestyle combined	Czech Republic	men	2012	80.2009
non-lifestyle combined	Czech Republic	men	2013	80.2509
non-lifestyle combined	Czech Republic	men	2014	80.5999
all-cause	Denmark	men	1951	69.6889
all-cause	Denmark	men	1952	69.371
all-cause	Denmark	men	1953	69.8741
all-cause	Denmark	men	1954	69.8765
all-cause	Denmark	men	1955	70.3797
all-cause	Denmark	men	1956	70.3912
all-cause	Denmark	men	1957	70.1451
all-cause	Denmark	men	1958	70.473
all-cause	Denmark	men	1959	70.5799
all-cause	Denmark	men	1960	70.4231
all-cause	Denmark	men	1961	70.5542
all-cause	Denmark	men	1962	70.3111
all-cause	Denmark	men	1963	70.4004
all-cause	Denmark	men	1964	70.2858
all-cause	Denmark	men	1965	70.1842
all-cause	Denmark	men	1966	70.2088
all-cause	Denmark	men	1967	70.6223
all-cause	Denmark	men	1968	70.7761
all-cause	Denmark	men	1969	70.8498
all-cause	Denmark	men	1970	70.8711
all-cause	Denmark	men	1971	70.7991
all-cause	Denmark	men	1972	70.808
all-cause	Denmark	men	1973	70.9688
all-cause	Denmark	men	1974	70.9421
all-cause	Denmark	men	1975	71.2847
all-cause	Denmark	men	1976	70.9346
all-cause	Denmark	men	1977	71.7263
all-cause	Denmark	men	1978	71.5177
all-cause	Denmark	men	1979	71.1974
all-cause	Denmark	men	1980	71.1754
all-cause	Denmark	men	1981	71.2453
all-cause	Denmark	men	1982	71.5998
all-cause	Denmark	men	1983	71.4445
all-cause	Denmark	men	1984	71.6528
all-cause	Denmark	men	1985	71.5317
all-cause	Denmark	men	1986	71.7695
all-cause	Denmark	men	1987	71.7444
all-cause	Denmark	men	1988	72.0397
all-cause	Denmark	men	1989	71.9921
all-cause	Denmark	men	1990	72.0228
all-cause	Denmark	men	1991	72.4741
all-cause	Denmark	men	1992	72.5625
all-cause	Denmark	men	1993	72.5954
all-cause	Denmark	men	1994	72.7756
all-cause	Denmark	men	1995	72.7287
all-cause	Denmark	men	1996	73.054
all-cause	Denmark	men	1997	73.5603
all-cause	Denmark	men	1998	73.9429
all-cause	Denmark	men	1999	74.2027
all-cause	Denmark	men	2000	74.4372
all-cause	Denmark	men	2001	74.6708
all-cause	Denmark	men	2002	74.8031
all-cause	Denmark	men	2003	75.283
all-cause	Denmark	men	2004	75.1515
all-cause	Denmark	men	2005	75.9369
all-cause	Denmark	men	2006	75.8956
all-cause	Denmark	men	2007	76.1298
all-cause	Denmark	men	2008	76.4846
all-cause	Denmark	men	2009	76.8481
all-cause	Denmark	men	2010	77.1157
all-cause	Denmark	men	2011	77.7108
all-cause	Denmark	men	2012	78.0596
all-cause	Denmark	men	2013	78.2658
all-cause	Denmark	men	2014	78.5678
non-smoking	Denmark	men	1951	71.1956
non-smoking	Denmark	men	1952	71.0394
non-smoking	Denmark	men	1953	71.593
non-smoking	Denmark	men	1954	71.5963
non-smoking	Denmark	men	1955	72.3234
non-smoking	Denmark	men	1956	72.4998
non-smoking	Denmark	men	1957	72.2805
non-smoking	Denmark	men	1958	72.5226
non-smoking	Denmark	men	1959	73.0513
non-smoking	Denmark	men	1960	72.8686
non-smoking	Denmark	men	1961	73.2958
non-smoking	Denmark	men	1962	72.969
non-smoking	Denmark	men	1963	73.3163
non-smoking	Denmark	men	1964	73.3215
non-smoking	Denmark	men	1965	73.3526
non-smoking	Denmark	men	1966	73.2813
non-smoking	Denmark	men	1967	73.9105
non-smoking	Denmark	men	1968	74.075
non-smoking	Denmark	men	1969	74.2728
non-smoking	Denmark	men	1970	74.2355
non-smoking	Denmark	men	1971	74.3968
non-smoking	Denmark	men	1972	74.772
non-smoking	Denmark	men	1973	74.6296
non-smoking	Denmark	men	1974	74.7704
non-smoking	Denmark	men	1975	74.9723
non-smoking	Denmark	men	1976	74.6919
non-smoking	Denmark	men	1977	75.6687
non-smoking	Denmark	men	1978	75.6711
non-smoking	Denmark	men	1979	75.29
non-smoking	Denmark	men	1980	75.3172
non-smoking	Denmark	men	1981	75.3848
non-smoking	Denmark	men	1982	75.739
non-smoking	Denmark	men	1983	75.6668
non-smoking	Denmark	men	1984	75.8308
non-smoking	Denmark	men	1985	75.746
non-smoking	Denmark	men	1986	75.9765
non-smoking	Denmark	men	1987	75.9128
non-smoking	Denmark	men	1988	76.1125
non-smoking	Denmark	men	1989	76.0897
non-smoking	Denmark	men	1990	76.0436
non-smoking	Denmark	men	1991	76.2307
non-smoking	Denmark	men	1992	76.3135
non-smoking	Denmark	men	1993	76.4843
non-smoking	Denmark	men	1994	76.4905
non-smoking	Denmark	men	1995	76.3125
non-smoking	Denmark	men	1996	76.7371
non-smoking	Denmark	men	1997	77.0504
non-smoking	Denmark	men	1998	77.1283
non-smoking	Denmark	men	1999	77.4347
non-smoking	Denmark	men	2000	77.7627
non-smoking	Denmark	men	2001	77.7841
non-smoking	Denmark	men	2002	77.7417
non-smoking	Denmark	men	2003	78.2731
non-smoking	Denmark	men	2004	78.0962
non-smoking	Denmark	men	2005	78.6813
non-smoking	Denmark	men	2006	78.8074
non-smoking	Denmark	men	2007	78.675
non-smoking	Denmark	men	2008	79.1874
non-smoking	Denmark	men	2009	79.233
non-smoking	Denmark	men	2010	79.4382
non-smoking	Denmark	men	2011	79.8424
non-smoking	Denmark	men	2012	80.3299
non-smoking	Denmark	men	2013	80.5049
non-smoking	Denmark	men	2014	80.6836
non-alcohol	Denmark	men	1990	73.1143
non-alcohol	Denmark	men	1991	73.5824
non-alcohol	Denmark	men	1992	73.6728
non-alcohol	Denmark	men	1993	73.7157
non-alcohol	Denmark	men	1994	73.9389
non-alcohol	Denmark	men	1995	73.8696
non-alcohol	Denmark	men	1996	74.2365
non-alcohol	Denmark	men	1997	74.7613
non-alcohol	Denmark	men	1998	75.1811
non-alcohol	Denmark	men	1999	75.5404
non-alcohol	Denmark	men	2000	75.7083
non-alcohol	Denmark	men	2001	75.9412
non-alcohol	Denmark	men	2002	76.1368
non-alcohol	Denmark	men	2003	76.6586
non-alcohol	Denmark	men	2004	76.5072
non-alcohol	Denmark	men	2005	77.2784
non-alcohol	Denmark	men	2006	77.2702
non-alcohol	Denmark	men	2007	77.4958
non-alcohol	Denmark	men	2008	77.764
non-alcohol	Denmark	men	2009	78.0923
non-alcohol	Denmark	men	2010	78.3124
non-alcohol	Denmark	men	2011	78.8464
non-alcohol	Denmark	men	2012	79.1487
non-alcohol	Denmark	men	2013	79.3428
non-alcohol	Denmark	men	2014	79.6286
non-obesity	Denmark	men	1975	71.6624
non-obesity	Denmark	men	1976	71.3305
non-obesity	Denmark	men	1977	72.1413
non-obesity	Denmark	men	1978	71.9482
non-obesity	Denmark	men	1979	71.6444
non-obesity	Denmark	men	1980	71.6456
non-obesity	Denmark	men	1981	71.7324
non-obesity	Denmark	men	1982	72.1065
non-obesity	Denmark	men	1983	71.9729
non-obesity	Denmark	men	1984	72.1956
non-obesity	Denmark	men	1985	72.0923
non-obesity	Denmark	men	1986	72.3542
non-obesity	Denmark	men	1987	72.3499
non-obesity	Denmark	men	1988	72.6575
non-obesity	Denmark	men	1989	72.6357
non-obesity	Denmark	men	1990	72.6749
non-obesity	Denmark	men	1991	73.1439
non-obesity	Denmark	men	1992	73.2478
non-obesity	Denmark	men	1993	73.2969
non-obesity	Denmark	men	1994	73.5047
non-obesity	Denmark	men	1995	73.4669
non-obesity	Denmark	men	1996	73.8143
non-obesity	Denmark	men	1997	74.3294
non-obesity	Denmark	men	1998	74.7301
non-obesity	Denmark	men	1999	74.996
non-obesity	Denmark	men	2000	75.2475
non-obesity	Denmark	men	2001	75.4966
non-obesity	Denmark	men	2002	75.6497
non-obesity	Denmark	men	2003	76.1455
non-obesity	Denmark	men	2004	76.0346
non-obesity	Denmark	men	2005	76.8173
non-obesity	Denmark	men	2006	76.816
non-obesity	Denmark	men	2007	77.0688
non-obesity	Denmark	men	2008	77.4242
non-obesity	Denmark	men	2009	77.805
non-obesity	Denmark	men	2010	78.0872
non-obesity	Denmark	men	2011	78.6839
non-obesity	Denmark	men	2012	79.039
non-obesity	Denmark	men	2013	79.2556
non-obesity	Denmark	men	2014	79.5762
non-lifestyle combined	Denmark	men	1990	77.4146
non-lifestyle combined	Denmark	men	1991	77.6377
non-lifestyle combined	Denmark	men	1992	77.7411
non-lifestyle combined	Denmark	men	1993	77.9231
non-lifestyle combined	Denmark	men	1994	78.0022
non-lifestyle combined	Denmark	men	1995	77.8529
non-lifestyle combined	Denmark	men	1996	78.2678
non-lifestyle combined	Denmark	men	1997	78.5994
non-lifestyle combined	Denmark	men	1998	78.7881
non-lifestyle combined	Denmark	men	1999	79.1353
non-lifestyle combined	Denmark	men	2000	79.3881
non-lifestyle combined	Denmark	men	2001	79.4622
non-lifestyle combined	Denmark	men	2002	79.4918
non-lifestyle combined	Denmark	men	2003	80.0468
non-lifestyle combined	Denmark	men	2004	79.8989
non-lifestyle combined	Denmark	men	2005	80.4827
non-lifestyle combined	Denmark	men	2006	80.6492
non-lifestyle combined	Denmark	men	2007	80.5574
non-lifestyle combined	Denmark	men	2008	80.955
non-lifestyle combined	Denmark	men	2009	81.064
non-lifestyle combined	Denmark	men	2010	81.2617
non-lifestyle combined	Denmark	men	2011	81.6261
non-lifestyle combined	Denmark	men	2012	82.0453
non-lifestyle combined	Denmark	men	2013	82.1946
non-lifestyle combined	Denmark	men	2014	82.4065
all-cause	Finland	men	1952	63.3233
all-cause	Finland	men	1953	63.2296
all-cause	Finland	men	1954	64.2086
all-cause	Finland	men	1955	63.8262
all-cause	Finland	men	1956	64.565
all-cause	Finland	men	1957	64.1014
all-cause	Finland	men	1958	65.2749
all-cause	Finland	men	1959	65.2376
all-cause	Finland	men	1960	65.4075
all-cause	Finland	men	1961	65.6
all-cause	Finland	men	1962	65.0914
all-cause	Finland	men	1963	65.5144
all-cause	Finland	men	1964	65.6536
all-cause	Finland	men	1965	65.2934
all-cause	Finland	men	1966	65.957
all-cause	Finland	men	1967	65.9271
all-cause	Finland	men	1968	65.8882
all-cause	Finland	men	1969	65.6401
all-cause	Finland	men	1970	66.1578
all-cause	Finland	men	1971	65.915
all-cause	Finland	men	1972	66.6067
all-cause	Finland	men	1973	66.9677
all-cause	Finland	men	1974	66.9349
all-cause	Finland	men	1975	67.4304
all-cause	Finland	men	1976	67.5393
all-cause	Finland	men	1977	67.9593
all-cause	Finland	men	1978	68.5782
all-cause	Finland	men	1979	68.9746
all-cause	Finland	men	1980	69.2418
all-cause	Finland	men	1981	69.6128
all-cause	Finland	men	1982	70.2322
all-cause	Finland	men	1983	70.2528
all-cause	Finland	men	1984	70.4861
all-cause	Finland	men	1985	70.1444
all-cause	Finland	men	1986	70.5741
all-cause	Finland	men	1987	70.6672
all-cause	Finland	men	1988	70.6581
all-cause	Finland	men	1989	70.8705
all-cause	Finland	men	1990	70.9447
all-cause	Finland	men	1991	71.3368
all-cause	Finland	men	1992	71.6743
all-cause	Finland	men	1993	72.1116
all-cause	Finland	men	1994	72.7932
all-cause	Finland	men	1995	72.8116
all-cause	Finland	men	1996	73.0327
all-cause	Finland	men	1997	73.4338
all-cause	Finland	men	1998	73.5152
all-cause	Finland	men	1999	73.7407
all-cause	Finland	men	2000	74.1524
all-cause	Finland	men	2001	74.5786
all-cause	Finland	men	2002	74.8638
all-cause	Finland	men	2003	75.128
all-cause	Finland	men	2004	75.3048
all-cause	Finland	men	2005	75.5314
all-cause	Finland	men	2006	75.8195
all-cause	Finland	men	2007	75.8562
all-cause	Finland	men	2008	76.3388
all-cause	Finland	men	2009	76.4785
all-cause	Finland	men	2010	76.7231
all-cause	Finland	men	2011	77.1901
all-cause	Finland	men	2012	77.504
all-cause	Finland	men	2013	77.8765
all-cause	Finland	men	2014	78.1326
non-smoking	Finland	men	1952	67.3866
non-smoking	Finland	men	1953	67.7608
non-smoking	Finland	men	1954	68.391
non-smoking	Finland	men	1955	68.3182
non-smoking	Finland	men	1956	68.9051
non-smoking	Finland	men	1957	68.8703
non-smoking	Finland	men	1958	70.3152
non-smoking	Finland	men	1959	70.2222
non-smoking	Finland	men	1960	70.49
non-smoking	Finland	men	1961	70.7487
non-smoking	Finland	men	1962	70.3183
non-smoking	Finland	men	1963	70.8705
non-smoking	Finland	men	1964	70.9957
non-smoking	Finland	men	1965	70.6163
non-smoking	Finland	men	1966	71.3155
non-smoking	Finland	men	1967	71.4727
non-smoking	Finland	men	1968	71.3909
non-smoking	Finland	men	1969	71.443
non-smoking	Finland	men	1970	71.7643
non-smoking	Finland	men	1971	71.7308
non-smoking	Finland	men	1972	72.0732
non-smoking	Finland	men	1973	72.4145
non-smoking	Finland	men	1974	72.478
non-smoking	Finland	men	1975	72.4826
non-smoking	Finland	men	1976	73.1224
non-smoking	Finland	men	1977	73.3736
non-smoking	Finland	men	1978	73.9642
non-smoking	Finland	men	1979	74.1804
non-smoking	Finland	men	1980	74.1869
non-smoking	Finland	men	1981	74.7354
non-smoking	Finland	men	1982	74.7688
non-smoking	Finland	men	1983	74.8161
non-smoking	Finland	men	1984	74.9797
non-smoking	Finland	men	1985	74.5771
non-smoking	Finland	men	1986	74.6904
non-smoking	Finland	men	1987	74.8655
non-smoking	Finland	men	1988	74.6466
non-smoking	Finland	men	1989	74.6283
non-smoking	Finland	men	1990	74.9087
non-smoking	Finland	men	1991	74.6853
non-smoking	Finland	men	1992	75.332
non-smoking	Finland	men	1993	75.5516
non-smoking	Finland	men	1994	75.8813
non-smoking	Finland	men	1995	75.9138
non-smoking	Finland	men	1996	76.1639
non-smoking	Finland	men	1997	76.1559
non-smoking	Finland	men	1998	76.4414
non-smoking	Finland	men	1999	76.352
non-smoking	Finland	men	2000	76.5861
non-smoking	Finland	men	2001	76.9743
non-smoking	Finland	men	2002	77.1168
non-smoking	Finland	men	2003	77.5238
non-smoking	Finland	men	2004	77.5626
non-smoking	Finland	men	2005	77.8343
non-smoking	Finland	men	2006	77.8855
non-smoking	Finland	men	2007	77.8774
non-smoking	Finland	men	2008	78.3684
non-smoking	Finland	men	2009	78.415
non-smoking	Finland	men	2010	78.7502
non-smoking	Finland	men	2011	78.9774
non-smoking	Finland	men	2012	79.2651
non-smoking	Finland	men	2013	79.6593
non-smoking	Finland	men	2014	79.6429
non-alcohol	Finland	men	1990	72.3455
non-alcohol	Finland	men	1991	72.7336
non-alcohol	Finland	men	1992	73.0418
non-alcohol	Finland	men	1993	73.4579
non-alcohol	Finland	men	1994	74.1425
non-alcohol	Finland	men	1995	74.1906
non-alcohol	Finland	men	1996	74.4459
non-alcohol	Finland	men	1997	74.8767
non-alcohol	Finland	men	1998	74.9842
non-alcohol	Finland	men	1999	75.2371
non-alcohol	Finland	men	2000	75.6606
non-alcohol	Finland	men	2001	76.0764
non-alcohol	Finland	men	2002	76.3509
non-alcohol	Finland	men	2003	76.6849
non-alcohol	Finland	men	2004	76.9456
non-alcohol	Finland	men	2005	77.1907
non-alcohol	Finland	men	2006	77.4555
non-alcohol	Finland	men	2007	77.5086
non-alcohol	Finland	men	2008	77.9832
non-alcohol	Finland	men	2009	78.0574
non-alcohol	Finland	men	2010	78.264
non-alcohol	Finland	men	2011	78.682
non-alcohol	Finland	men	2012	78.933
non-alcohol	Finland	men	2013	79.2806
non-alcohol	Finland	men	2014	79.4726
non-obesity	Finland	men	1975	67.8315
non-obesity	Finland	men	1976	67.9622
non-obesity	Finland	men	1977	68.4085
non-obesity	Finland	men	1978	69.0441
non-obesity	Finland	men	1979	69.4639
non-obesity	Finland	men	1980	69.7431
non-obesity	Finland	men	1981	70.1448
non-obesity	Finland	men	1982	70.7926
non-obesity	Finland	men	1983	70.8221
non-obesity	Finland	men	1984	71.0902
non-obesity	Finland	men	1985	70.7668
non-obesity	Finland	men	1986	71.2395
non-obesity	Finland	men	1987	71.353
non-obesity	Finland	men	1988	71.3783
non-obesity	Finland	men	1989	71.619
non-obesity	Finland	men	1990	71.717
non-obesity	Finland	men	1991	72.1397
non-obesity	Finland	men	1992	72.4931
non-obesity	Finland	men	1993	72.9432
non-obesity	Finland	men	1994	73.6506
non-obesity	Finland	men	1995	73.697
non-obesity	Finland	men	1996	73.9392
non-obesity	Finland	men	1997	74.3597
non-obesity	Finland	men	1998	74.4658
non-obesity	Finland	men	1999	74.7105
non-obesity	Finland	men	2000	75.1353
non-obesity	Finland	men	2001	75.5719
non-obesity	Finland	men	2002	75.8759
non-obesity	Finland	men	2003	76.1673
non-obesity	Finland	men	2004	76.386
non-obesity	Finland	men	2005	76.6427
non-obesity	Finland	men	2006	76.9316
non-obesity	Finland	men	2007	77.0015
non-obesity	Finland	men	2008	77.5037
non-obesity	Finland	men	2009	77.6501
non-obesity	Finland	men	2010	77.9007
non-obesity	Finland	men	2011	78.3717
non-obesity	Finland	men	2012	78.689
non-obesity	Finland	men	2013	79.0794
non-obesity	Finland	men	2014	79.3341
non-lifestyle combined	Finland	men	1990	76.6842
non-lifestyle combined	Finland	men	1991	76.5927
non-lifestyle combined	Finland	men	1992	77.1602
non-lifestyle combined	Finland	men	1993	77.3652
non-lifestyle combined	Finland	men	1994	77.7681
non-lifestyle combined	Finland	men	1995	77.8485
non-lifestyle combined	Finland	men	1996	78.0934
non-lifestyle combined	Finland	men	1997	78.2197
non-lifestyle combined	Finland	men	1998	78.4559
non-lifestyle combined	Finland	men	1999	78.4572
non-lifestyle combined	Finland	men	2000	78.7418
non-lifestyle combined	Finland	men	2001	79.1191
non-lifestyle combined	Finland	men	2002	79.2936
non-lifestyle combined	Finland	men	2003	79.6994
non-lifestyle combined	Finland	men	2004	79.8842
non-lifestyle combined	Finland	men	2005	80.1694
non-lifestyle combined	Finland	men	2006	80.2847
non-lifestyle combined	Finland	men	2007	80.3219
non-lifestyle combined	Finland	men	2008	80.7745
non-lifestyle combined	Finland	men	2009	80.7937
non-lifestyle combined	Finland	men	2010	81.077
non-lifestyle combined	Finland	men	2011	81.2903
non-lifestyle combined	Finland	men	2012	81.5185
non-lifestyle combined	Finland	men	2013	81.9046
non-lifestyle combined	Finland	men	2014	81.8776
all-cause	France	men	1950	63.3875
all-cause	France	men	1951	63.1252
all-cause	France	men	1952	64.3778
all-cause	France	men	1953	64.2536
all-cause	France	men	1954	65.0015
all-cause	France	men	1955	65.2014
all-cause	France	men	1956	65.1432
all-cause	France	men	1957	65.4745
all-cause	France	men	1958	66.8335
all-cause	France	men	1959	66.8391
all-cause	France	men	1960	67.0106
all-cause	France	men	1961	67.4506
all-cause	France	men	1962	66.9803
all-cause	France	men	1963	66.7984
all-cause	France	men	1964	67.6702
all-cause	France	men	1965	67.4644
all-cause	France	men	1966	67.8134
all-cause	France	men	1967	67.7816
all-cause	France	men	1968	67.7559
all-cause	France	men	1969	67.4106
all-cause	France	men	1970	68.3665
all-cause	France	men	1971	68.3059
all-cause	France	men	1972	68.4816
all-cause	France	men	1973	68.6836
all-cause	France	men	1974	68.9286
all-cause	France	men	1975	69.015
all-cause	France	men	1976	69.1498
all-cause	France	men	1977	69.6962
all-cause	France	men	1978	69.8212
all-cause	France	men	1979	70.0541
all-cause	France	men	1980	70.1506
all-cause	France	men	1981	70.3739
all-cause	France	men	1982	70.7096
all-cause	France	men	1983	70.7291
all-cause	France	men	1984	71.1421
all-cause	France	men	1985	71.2375
all-cause	France	men	1986	71.5054
all-cause	France	men	1987	72.0313
all-cause	France	men	1988	72.3199
all-cause	France	men	1989	72.448
all-cause	France	men	1990	72.7227
all-cause	France	men	1991	72.8784
all-cause	France	men	1992	73.1482
all-cause	France	men	1993	73.2476
all-cause	France	men	1994	73.647
all-cause	France	men	1995	73.8365
all-cause	France	men	1996	74.0652
all-cause	France	men	1997	74.5084
all-cause	France	men	1998	74.725
all-cause	France	men	1999	74.9417
all-cause	France	men	2000	75.2378
all-cause	France	men	2001	75.4343
all-cause	France	men	2002	75.7094
all-cause	France	men	2003	75.8121
all-cause	France	men	2004	76.6789
all-cause	France	men	2005	76.7237
all-cause	France	men	2006	77.1657
all-cause	France	men	2007	77.3947
all-cause	France	men	2008	77.6
all-cause	France	men	2009	77.7585
all-cause	France	men	2010	78.0227
all-cause	France	men	2011	78.4353
all-cause	France	men	2012	78.4975
all-cause	France	men	2013	78.7753
all-cause	France	men	2014	79.2858
non-smoking	France	men	1950	64.5924
non-smoking	France	men	1951	64.4812
non-smoking	France	men	1952	65.8825
non-smoking	France	men	1953	65.8348
non-smoking	France	men	1954	66.7741
non-smoking	France	men	1955	67.0188
non-smoking	France	men	1956	67.0694
non-smoking	France	men	1957	67.6025
non-smoking	France	men	1958	68.8838
non-smoking	France	men	1959	68.9803
non-smoking	France	men	1960	69.2942
non-smoking	France	men	1961	69.851
non-smoking	France	men	1962	69.3863
non-smoking	France	men	1963	69.4372
non-smoking	France	men	1964	70.3019
non-smoking	France	men	1965	70.2522
non-smoking	France	men	1966	70.7243
non-smoking	France	men	1967	70.716
non-smoking	France	men	1968	70.7215
non-smoking	France	men	1969	70.4862
non-smoking	France	men	1970	71.3631
non-smoking	France	men	1971	71.4178
non-smoking	France	men	1972	71.7913
non-smoking	France	men	1973	71.9895
non-smoking	France	men	1974	72.3874
non-smoking	France	men	1975	72.5726
non-smoking	France	men	1976	72.8529
non-smoking	France	men	1977	73.44
non-smoking	France	men	1978	73.6782
non-smoking	France	men	1979	73.9335
non-smoking	France	men	1980	74.0628
non-smoking	France	men	1981	74.273
non-smoking	France	men	1982	74.5936
non-smoking	France	men	1983	74.6083
non-smoking	France	men	1984	75.0838
non-smoking	France	men	1985	75.2123
non-smoking	France	men	1986	75.5076
non-smoking	France	men	1987	76.0234
non-smoking	France	men	1988	76.3285
non-smoking	France	men	1989	76.4565
non-smoking	France	men	1990	76.6739
non-smoking	France	men	1991	76.8541
non-smoking	France	men	1992	77.1174
non-smoking	France	men	1993	77.2012
non-smoking	France	men	1994	77.5468
non-smoking	France	men	1995	77.7263
non-smoking	France	men	1996	77.9053
non-smoking	France	men	1997	78.266
non-smoking	France	men	1998	78.4606
non-smoking	France	men	1999	78.6035
non-smoking	France	men	2000	78.8118
non-smoking	France	men	2001	78.9588
non-smoking	France	men	2002	79.1888
non-smoking	France	men	2003	79.2192
non-smoking	France	men	2004	80.019
non-smoking	France	men	2005	80.042
non-smoking	France	men	2006	80.4174
non-smoking	France	men	2007	80.5498
non-smoking	France	men	2008	80.6516
non-smoking	France	men	2009	80.7955
non-smoking	France	men	2010	80.9531
non-smoking	France	men	2011	81.3229
non-smoking	France	men	2012	81.2658
non-smoking	France	men	2013	81.4481
non-smoking	France	men	2014	81.9146
non-alcohol	France	men	1990	74.833
non-alcohol	France	men	1991	74.9359
non-alcohol	France	men	1992	75.1488
non-alcohol	France	men	1993	75.1974
non-alcohol	France	men	1994	75.5391
non-alcohol	France	men	1995	75.659
non-alcohol	France	men	1996	75.8393
non-alcohol	France	men	1997	76.2498
non-alcohol	France	men	1998	76.4718
non-alcohol	France	men	1999	76.6515
non-alcohol	France	men	2000	76.9073
non-alcohol	France	men	2001	77.0976
non-alcohol	France	men	2002	77.3485
non-alcohol	France	men	2003	77.4088
non-alcohol	France	men	2004	78.2223
non-alcohol	France	men	2005	78.2519
non-alcohol	France	men	2006	78.6763
non-alcohol	France	men	2007	78.8765
non-alcohol	France	men	2008	79.05
non-alcohol	France	men	2009	79.2014
non-alcohol	France	men	2010	79.4472
non-alcohol	France	men	2011	79.84
non-alcohol	France	men	2012	79.8358
non-alcohol	France	men	2013	80.072
non-alcohol	France	men	2014	80.5461
non-obesity	France	men	1975	69.4661
non-obesity	France	men	1976	69.6202
non-obesity	France	men	1977	70.184
non-obesity	France	men	1978	70.3227
non-obesity	France	men	1979	70.5746
non-obesity	France	men	1980	70.6854
non-obesity	France	men	1981	70.9225
non-obesity	France	men	1982	71.279
non-obesity	France	men	1983	71.3125
non-obesity	France	men	1984	71.7467
non-obesity	France	men	1985	71.8561
non-obesity	France	men	1986	72.1435
non-obesity	France	men	1987	72.6871
non-obesity	France	men	1988	72.9941
non-obesity	France	men	1989	73.1425
non-obesity	France	men	1990	73.4336
non-obesity	France	men	1991	73.6128
non-obesity	France	men	1992	73.9051
non-obesity	France	men	1993	74.0226
non-obesity	France	men	1994	74.4458
non-obesity	France	men	1995	74.6535
non-obesity	France	men	1996	74.8961
non-obesity	France	men	1997	75.3512
non-obesity	France	men	1998	75.585
non-obesity	France	men	1999	75.8182
non-obesity	France	men	2000	76.1336
non-obesity	France	men	2001	76.3511
non-obesity	France	men	2002	76.6458
non-obesity	France	men	2003	76.7631
non-obesity	France	men	2004	77.6427
non-obesity	France	men	2005	77.706
non-obesity	France	men	2006	78.1679
non-obesity	France	men	2007	78.4105
non-obesity	France	men	2008	78.6311
non-obesity	France	men	2009	78.8115
non-obesity	France	men	2010	79.0945
non-obesity	France	men	2011	79.523
non-obesity	France	men	2012	79.5934
non-obesity	France	men	2013	79.888
non-obesity	France	men	2014	80.4126
non-lifestyle combined	France	men	1990	78.7284
non-lifestyle combined	France	men	1991	78.8779
non-lifestyle combined	France	men	1992	79.1134
non-lifestyle combined	France	men	1993	79.1737
non-lifestyle combined	France	men	1994	79.4893
non-lifestyle combined	France	men	1995	79.6339
non-lifestyle combined	France	men	1996	79.7852
non-lifestyle combined	France	men	1997	80.1267
non-lifestyle combined	France	men	1998	80.3192
non-lifestyle combined	France	men	1999	80.4507
non-lifestyle combined	France	men	2000	80.6406
non-lifestyle combined	France	men	2001	80.7994
non-lifestyle combined	France	men	2002	81.0244
non-lifestyle combined	France	men	2003	81.0392
non-lifestyle combined	France	men	2004	81.8031
non-lifestyle combined	France	men	2005	81.8296
non-lifestyle combined	France	men	2006	82.2223
non-lifestyle combined	France	men	2007	82.3544
non-lifestyle combined	France	men	2008	82.4667
non-lifestyle combined	France	men	2009	82.6145
non-lifestyle combined	France	men	2010	82.8014
non-lifestyle combined	France	men	2011	83.1636
non-lifestyle combined	France	men	2012	83.0903
non-lifestyle combined	France	men	2013	83.2732
non-lifestyle combined	France	men	2014	83.7247
all-cause	Germany	men	1970	67.4887
all-cause	Germany	men	1971	67.7001
all-cause	Germany	men	1972	67.849
all-cause	Germany	men	1973	68.0403
all-cause	Germany	men	1974	68.3892
all-cause	Germany	men	1975	68.1661
all-cause	Germany	men	1976	68.6195
all-cause	Germany	men	1977	69.1593
all-cause	Germany	men	1978	69.1053
all-cause	Germany	men	1979	69.4565
all-cause	Germany	men	1980	69.6119
all-cause	Germany	men	1981	69.8896
all-cause	Germany	men	1982	70.178
all-cause	Germany	men	1983	70.4656
all-cause	Germany	men	1984	70.9437
all-cause	Germany	men	1985	71.0752
all-cause	Germany	men	1986	71.31
all-cause	Germany	men	1987	71.6691
all-cause	Germany	men	1988	71.8702
all-cause	Germany	men	1989	72.076
all-cause	Germany	men	1990	71.9121
all-cause	Germany	men	1991	72.0962
all-cause	Germany	men	1992	72.5311
all-cause	Germany	men	1993	72.6358
all-cause	Germany	men	1994	72.9492
all-cause	Germany	men	1995	73.1208
all-cause	Germany	men	1996	73.4227
all-cause	Germany	men	1997	73.8804
all-cause	Germany	men	1998	74.317
all-cause	Germany	men	1999	74.5775
all-cause	Germany	men	2000	74.8591
all-cause	Germany	men	2001	75.2779
all-cause	Germany	men	2002	75.4418
all-cause	Germany	men	2003	75.5167
all-cause	Germany	men	2004	76.1515
all-cause	Germany	men	2005	76.3579
all-cause	Germany	men	2006	76.7543
all-cause	Germany	men	2007	76.9146
all-cause	Germany	men	2008	77.1079
all-cause	Germany	men	2009	77.2365
all-cause	Germany	men	2010	77.4363
all-cause	Germany	men	2011	77.7744
all-cause	Germany	men	2012	77.9688
all-cause	Germany	men	2013	77.9856
all-cause	Germany	men	2014	78.4364
non-smoking	Germany	men	1970	71.1574
non-smoking	Germany	men	1971	71.4225
non-smoking	Germany	men	1972	71.6342
non-smoking	Germany	men	1973	71.8269
non-smoking	Germany	men	1974	72.2188
non-smoking	Germany	men	1975	72.0524
non-smoking	Germany	men	1976	72.5178
non-smoking	Germany	men	1977	73.1027
non-smoking	Germany	men	1978	73.138
non-smoking	Germany	men	1979	73.4275
non-smoking	Germany	men	1980	73.5881
non-smoking	Germany	men	1981	73.8053
non-smoking	Germany	men	1982	74.0744
non-smoking	Germany	men	1983	74.4044
non-smoking	Germany	men	1984	74.8465
non-smoking	Germany	men	1985	74.9931
non-smoking	Germany	men	1986	75.157
non-smoking	Germany	men	1987	75.4891
non-smoking	Germany	men	1988	75.7293
non-smoking	Germany	men	1989	75.8956
non-smoking	Germany	men	1990	75.7252
non-smoking	Germany	men	1991	75.9037
non-smoking	Germany	men	1992	76.2895
non-smoking	Germany	men	1993	76.3666
non-smoking	Germany	men	1994	76.572
non-smoking	Germany	men	1995	76.7393
non-smoking	Germany	men	1996	76.9021
non-smoking	Germany	men	1997	77.2782
non-smoking	Germany	men	1998	77.6208
non-smoking	Germany	men	1999	77.7583
non-smoking	Germany	men	2000	78.0434
non-smoking	Germany	men	2001	78.3081
non-smoking	Germany	men	2002	78.4166
non-smoking	Germany	men	2003	78.4128
non-smoking	Germany	men	2004	78.9638
non-smoking	Germany	men	2005	79.1016
non-smoking	Germany	men	2006	79.4093
non-smoking	Germany	men	2007	79.4993
non-smoking	Germany	men	2008	79.662
non-smoking	Germany	men	2009	79.6935
non-smoking	Germany	men	2010	79.8012
non-smoking	Germany	men	2011	80.1315
non-smoking	Germany	men	2012	80.2903
non-smoking	Germany	men	2013	80.2457
non-smoking	Germany	men	2014	80.6289
non-alcohol	Germany	men	1990	73.4419
non-alcohol	Germany	men	1991	73.664
non-alcohol	Germany	men	1992	74.1046
non-alcohol	Germany	men	1993	74.1879
non-alcohol	Germany	men	1994	74.4959
non-alcohol	Germany	men	1995	74.6292
non-alcohol	Germany	men	1996	74.9074
non-alcohol	Germany	men	1997	75.3386
non-alcohol	Germany	men	1998	75.726
non-alcohol	Germany	men	1999	75.9549
non-alcohol	Germany	men	2000	76.2244
non-alcohol	Germany	men	2001	76.6173
non-alcohol	Germany	men	2002	76.7598
non-alcohol	Germany	men	2003	76.8176
non-alcohol	Germany	men	2004	77.4238
non-alcohol	Germany	men	2005	77.6002
non-alcohol	Germany	men	2006	77.9667
non-alcohol	Germany	men	2007	78.0892
non-alcohol	Germany	men	2008	78.2543
non-alcohol	Germany	men	2009	78.362
non-alcohol	Germany	men	2010	78.5456
non-alcohol	Germany	men	2011	78.8698
non-alcohol	Germany	men	2012	79.0449
non-alcohol	Germany	men	2013	79.0581
non-alcohol	Germany	men	2014	79.5
non-obesity	Germany	men	1975	68.6575
non-obesity	Germany	men	1976	69.1285
non-obesity	Germany	men	1977	69.6878
non-obesity	Germany	men	1978	69.6504
non-obesity	Germany	men	1979	70.0197
non-obesity	Germany	men	1980	70.193
non-obesity	Germany	men	1981	70.4869
non-obesity	Germany	men	1982	70.7947
non-obesity	Germany	men	1983	71.0989
non-obesity	Germany	men	1984	71.5954
non-obesity	Germany	men	1985	71.7437
non-obesity	Germany	men	1986	71.9975
non-obesity	Germany	men	1987	72.3808
non-obesity	Germany	men	1988	72.6042
non-obesity	Germany	men	1989	72.8297
non-obesity	Germany	men	1990	72.6937
non-obesity	Germany	men	1991	72.9058
non-obesity	Germany	men	1992	73.3661
non-obesity	Germany	men	1993	73.4887
non-obesity	Germany	men	1994	73.8269
non-obesity	Germany	men	1995	74.0176
non-obesity	Germany	men	1996	74.3377
non-obesity	Germany	men	1997	74.8127
non-obesity	Germany	men	1998	75.2611
non-obesity	Germany	men	1999	75.5385
non-obesity	Germany	men	2000	75.8435
non-obesity	Germany	men	2001	76.2793
non-obesity	Germany	men	2002	76.4604
non-obesity	Germany	men	2003	76.5518
non-obesity	Germany	men	2004	77.2061
non-obesity	Germany	men	2005	77.4259
non-obesity	Germany	men	2006	77.8381
non-obesity	Germany	men	2007	78.0139
non-obesity	Germany	men	2008	78.2218
non-obesity	Germany	men	2009	78.3682
non-obesity	Germany	men	2010	78.5914
non-obesity	Germany	men	2011	78.9442
non-obesity	Germany	men	2012	79.1507
non-obesity	Germany	men	2013	79.1885
non-obesity	Germany	men	2014	79.6599
non-lifestyle combined	Germany	men	1990	77.4927
non-lifestyle combined	Germany	men	1991	77.7257
non-lifestyle combined	Germany	men	1992	78.1439
non-lifestyle combined	Germany	men	1993	78.2216
non-lifestyle combined	Germany	men	1994	78.4499
non-lifestyle combined	Germany	men	1995	78.6006
non-lifestyle combined	Germany	men	1996	78.7629
non-lifestyle combined	Germany	men	1997	79.1346
non-lifestyle combined	Germany	men	1998	79.4535
non-lifestyle combined	Germany	men	1999	79.5829
non-lifestyle combined	Germany	men	2000	79.8721
non-lifestyle combined	Germany	men	2001	80.15
non-lifestyle combined	Germany	men	2002	80.2538
non-lifestyle combined	Germany	men	2003	80.2544
non-lifestyle combined	Germany	men	2004	80.8077
non-lifestyle combined	Germany	men	2005	80.9384
non-lifestyle combined	Germany	men	2006	81.2385
non-lifestyle combined	Germany	men	2007	81.3226
non-lifestyle combined	Germany	men	2008	81.474
non-lifestyle combined	Germany	men	2009	81.5148
non-lifestyle combined	Germany	men	2010	81.6534
non-lifestyle combined	Germany	men	2011	81.9749
non-lifestyle combined	Germany	men	2012	82.1263
non-lifestyle combined	Germany	men	2013	82.108
non-lifestyle combined	Germany	men	2014	82.5065
all-cause	Greece	men	1981	73.3907
all-cause	Greece	men	1982	73.445
all-cause	Greece	men	1983	73.277
all-cause	Greece	men	1984	73.6839
all-cause	Greece	men	1985	73.4078
all-cause	Greece	men	1986	73.9845
all-cause	Greece	men	1987	73.824
all-cause	Greece	men	1988	74.2701
all-cause	Greece	men	1989	74.4801
all-cause	Greece	men	1990	74.6615
all-cause	Greece	men	1991	74.661
all-cause	Greece	men	1992	74.62
all-cause	Greece	men	1993	74.8734
all-cause	Greece	men	1994	75.0523
all-cause	Greece	men	1995	74.9295
all-cause	Greece	men	1996	75.0448
all-cause	Greece	men	1997	75.4261
all-cause	Greece	men	1998	75.508
all-cause	Greece	men	1999	75.56
all-cause	Greece	men	2000	75.661
all-cause	Greece	men	2001	76.1319
all-cause	Greece	men	2002	76.4072
all-cause	Greece	men	2003	76.5909
all-cause	Greece	men	2004	76.6934
all-cause	Greece	men	2005	76.8544
all-cause	Greece	men	2006	77.1598
all-cause	Greece	men	2007	76.9428
all-cause	Greece	men	2008	77.4792
all-cause	Greece	men	2009	77.4902
all-cause	Greece	men	2010	77.8767
all-cause	Greece	men	2011	77.8841
all-cause	Greece	men	2012	77.8263
all-cause	Greece	men	2013	78.4563
non-smoking	Greece	men	1981	76.7176
non-smoking	Greece	men	1982	76.8164
non-smoking	Greece	men	1983	76.6753
non-smoking	Greece	men	1984	77.0822
non-smoking	Greece	men	1985	76.9083
non-smoking	Greece	men	1986	77.4149
non-smoking	Greece	men	1987	77.2325
non-smoking	Greece	men	1988	77.7078
non-smoking	Greece	men	1989	78.0227
non-smoking	Greece	men	1990	78.1118
non-smoking	Greece	men	1991	78.1659
non-smoking	Greece	men	1992	78.0663
non-smoking	Greece	men	1993	78.4172
non-smoking	Greece	men	1994	78.5653
non-smoking	Greece	men	1995	78.395
non-smoking	Greece	men	1996	78.5533
non-smoking	Greece	men	1997	78.852
non-smoking	Greece	men	1998	78.9222
non-smoking	Greece	men	1999	78.9414
non-smoking	Greece	men	2000	79.0372
non-smoking	Greece	men	2001	79.474
non-smoking	Greece	men	2002	79.567
non-smoking	Greece	men	2003	79.8383
non-smoking	Greece	men	2004	79.9775
non-smoking	Greece	men	2005	80.0804
non-smoking	Greece	men	2006	80.3479
non-smoking	Greece	men	2007	80.1444
non-smoking	Greece	men	2008	80.6748
non-smoking	Greece	men	2009	80.6462
non-smoking	Greece	men	2010	80.9185
non-smoking	Greece	men	2011	80.9942
non-smoking	Greece	men	2012	80.9646
non-smoking	Greece	men	2013	81.682
non-alcohol	Greece	men	1990	75.6799
non-alcohol	Greece	men	1991	75.6899
non-alcohol	Greece	men	1992	75.6114
non-alcohol	Greece	men	1993	75.8319
non-alcohol	Greece	men	1994	75.9916
non-alcohol	Greece	men	1995	75.8426
non-alcohol	Greece	men	1996	75.9383
non-alcohol	Greece	men	1997	76.2929
non-alcohol	Greece	men	1998	76.3421
non-alcohol	Greece	men	1999	76.3892
non-alcohol	Greece	men	2000	76.4706
non-alcohol	Greece	men	2001	76.938
non-alcohol	Greece	men	2002	77.1789
non-alcohol	Greece	men	2003	77.3698
non-alcohol	Greece	men	2004	77.4876
non-alcohol	Greece	men	2005	77.6489
non-alcohol	Greece	men	2006	77.9406
non-alcohol	Greece	men	2007	77.7488
non-alcohol	Greece	men	2008	78.2767
non-alcohol	Greece	men	2009	78.2952
non-alcohol	Greece	men	2010	78.6592
non-alcohol	Greece	men	2011	78.6603
non-alcohol	Greece	men	2012	78.5922
non-alcohol	Greece	men	2013	79.2053
non-obesity	Greece	men	1981	73.8767
non-obesity	Greece	men	1982	73.9533
non-obesity	Greece	men	1983	73.7957
non-obesity	Greece	men	1984	74.2266
non-obesity	Greece	men	1985	73.9689
non-obesity	Greece	men	1986	74.558
non-obesity	Greece	men	1987	74.4207
non-obesity	Greece	men	1988	74.8851
non-obesity	Greece	men	1989	75.1166
non-obesity	Greece	men	1990	75.3109
non-obesity	Greece	men	1991	75.3402
non-obesity	Greece	men	1992	75.319
non-obesity	Greece	men	1993	75.594
non-obesity	Greece	men	1994	75.7922
non-obesity	Greece	men	1995	75.6925
non-obesity	Greece	men	1996	75.8322
non-obesity	Greece	men	1997	76.2338
non-obesity	Greece	men	1998	76.3305
non-obesity	Greece	men	1999	76.4038
non-obesity	Greece	men	2000	76.5248
non-obesity	Greece	men	2001	77.0167
non-obesity	Greece	men	2002	77.2993
non-obesity	Greece	men	2003	77.5101
non-obesity	Greece	men	2004	77.6423
non-obesity	Greece	men	2005	77.8257
non-obesity	Greece	men	2006	78.1512
non-obesity	Greece	men	2007	77.9711
non-obesity	Greece	men	2008	78.5223
non-obesity	Greece	men	2009	78.5616
non-obesity	Greece	men	2010	78.9603
non-obesity	Greece	men	2011	78.9997
non-obesity	Greece	men	2012	78.9695
non-obesity	Greece	men	2013	79.6234
non-lifestyle combined	Greece	men	1990	79.3855
non-lifestyle combined	Greece	men	1991	79.4772
non-lifestyle combined	Greece	men	1992	79.3586
non-lifestyle combined	Greece	men	1993	79.7009
non-lifestyle combined	Greece	men	1994	79.8453
non-lifestyle combined	Greece	men	1995	79.6749
non-lifestyle combined	Greece	men	1996	79.8329
non-lifestyle combined	Greece	men	1997	80.1343
non-lifestyle combined	Greece	men	1998	80.188
non-lifestyle combined	Greece	men	1999	80.2242
non-lifestyle combined	Greece	men	2000	80.3133
non-lifestyle combined	Greece	men	2001	80.7612
non-lifestyle combined	Greece	men	2002	80.8639
non-lifestyle combined	Greece	men	2003	81.1301
non-lifestyle combined	Greece	men	2004	81.3083
non-lifestyle combined	Greece	men	2005	81.435
non-lifestyle combined	Greece	men	2006	81.7065
non-lifestyle combined	Greece	men	2007	81.5588
non-lifestyle combined	Greece	men	2008	82.0947
non-lifestyle combined	Greece	men	2009	82.0966
non-lifestyle combined	Greece	men	2010	82.3726
non-lifestyle combined	Greece	men	2011	82.4642
non-lifestyle combined	Greece	men	2012	82.4508
non-lifestyle combined	Greece	men	2013	83.16
all-cause	Hungary	men	1955	64.8851
all-cause	Hungary	men	1956	63.4971
all-cause	Hungary	men	1957	64.0322
all-cause	Hungary	men	1958	65.2749
all-cause	Hungary	men	1959	65.0129
all-cause	Hungary	men	1960	65.8853
all-cause	Hungary	men	1961	66.7281
all-cause	Hungary	men	1962	65.6424
all-cause	Hungary	men	1963	66.5707
all-cause	Hungary	men	1964	66.973
all-cause	Hungary	men	1965	66.6685
all-cause	Hungary	men	1966	67.4589
all-cause	Hungary	men	1967	66.8183
all-cause	Hungary	men	1968	66.6434
all-cause	Hungary	men	1969	66.651
all-cause	Hungary	men	1970	66.3022
all-cause	Hungary	men	1971	66.0756
all-cause	Hungary	men	1972	66.7913
all-cause	Hungary	men	1973	66.6061
all-cause	Hungary	men	1974	66.2728
all-cause	Hungary	men	1975	66.317
all-cause	Hungary	men	1976	66.6713
all-cause	Hungary	men	1977	66.7562
all-cause	Hungary	men	1978	66.1423
all-cause	Hungary	men	1979	66.2118
all-cause	Hungary	men	1980	65.5159
all-cause	Hungary	men	1981	65.4802
all-cause	Hungary	men	1982	65.6202
all-cause	Hungary	men	1983	65.0477
all-cause	Hungary	men	1984	64.9723
all-cause	Hungary	men	1985	64.9475
all-cause	Hungary	men	1986	65.1957
all-cause	Hungary	men	1987	65.5529
all-cause	Hungary	men	1988	65.9952
all-cause	Hungary	men	1989	65.2355
all-cause	Hungary	men	1990	65.1443
all-cause	Hungary	men	1991	65.1061
all-cause	Hungary	men	1992	64.6597
all-cause	Hungary	men	1993	64.6537
all-cause	Hungary	men	1994	65.0045
all-cause	Hungary	men	1995	65.4168
all-cause	Hungary	men	1996	66.2962
all-cause	Hungary	men	1997	66.6404
all-cause	Hungary	men	1998	66.4321
all-cause	Hungary	men	1999	66.6678
all-cause	Hungary	men	2000	67.4888
all-cause	Hungary	men	2001	68.1872
all-cause	Hungary	men	2002	68.2865
all-cause	Hungary	men	2003	68.3275
all-cause	Hungary	men	2004	68.6646
all-cause	Hungary	men	2005	68.6186
all-cause	Hungary	men	2006	69.0822
all-cause	Hungary	men	2007	69.2653
all-cause	Hungary	men	2008	69.8361
all-cause	Hungary	men	2009	70.1232
all-cause	Hungary	men	2010	70.5739
all-cause	Hungary	men	2011	71.1507
all-cause	Hungary	men	2012	71.5533
all-cause	Hungary	men	2013	72.1262
all-cause	Hungary	men	2014	72.2619
non-smoking	Hungary	men	1955	66.8688
non-smoking	Hungary	men	1956	65.7186
non-smoking	Hungary	men	1957	66.1203
non-smoking	Hungary	men	1958	67.3207
non-smoking	Hungary	men	1959	67.4895
non-smoking	Hungary	men	1960	68.1849
non-smoking	Hungary	men	1961	69.2891
non-smoking	Hungary	men	1962	68.1814
non-smoking	Hungary	men	1963	69.287
non-smoking	Hungary	men	1964	69.6647
non-smoking	Hungary	men	1965	69.5423
non-smoking	Hungary	men	1966	70.4452
non-smoking	Hungary	men	1967	69.9939
non-smoking	Hungary	men	1968	69.8826
non-smoking	Hungary	men	1969	70.0996
non-smoking	Hungary	men	1970	69.6263
non-smoking	Hungary	men	1971	69.7026
non-smoking	Hungary	men	1972	70.3552
non-smoking	Hungary	men	1973	70.2738
non-smoking	Hungary	men	1974	70.2889
non-smoking	Hungary	men	1975	70.347
non-smoking	Hungary	men	1976	70.944
non-smoking	Hungary	men	1977	71.1861
non-smoking	Hungary	men	1978	70.9417
non-smoking	Hungary	men	1979	71.1796
non-smoking	Hungary	men	1980	70.6535
non-smoking	Hungary	men	1981	70.8693
non-smoking	Hungary	men	1982	71.1107
non-smoking	Hungary	men	1983	70.7784
non-smoking	Hungary	men	1984	70.7659
non-smoking	Hungary	men	1985	70.7311
non-smoking	Hungary	men	1986	71.2201
non-smoking	Hungary	men	1987	71.6478
non-smoking	Hungary	men	1988	72.0815
non-smoking	Hungary	men	1989	71.4732
non-smoking	Hungary	men	1990	71.5492
non-smoking	Hungary	men	1991	71.63
non-smoking	Hungary	men	1992	71.4976
non-smoking	Hungary	men	1993	71.5553
non-smoking	Hungary	men	1994	72.0502
non-smoking	Hungary	men	1995	72.3145
non-smoking	Hungary	men	1996	73.1123
non-smoking	Hungary	men	1997	73.4048
non-smoking	Hungary	men	1998	73.2455
non-smoking	Hungary	men	1999	73.4251
non-smoking	Hungary	men	2000	74.0574
non-smoking	Hungary	men	2001	74.6229
non-smoking	Hungary	men	2002	74.634
non-smoking	Hungary	men	2003	74.7107
non-smoking	Hungary	men	2004	75.0368
non-smoking	Hungary	men	2005	74.7595
non-smoking	Hungary	men	2006	75.2154
non-smoking	Hungary	men	2007	75.3647
non-smoking	Hungary	men	2008	75.808
non-smoking	Hungary	men	2009	76.0899
non-smoking	Hungary	men	2010	76.5014
non-smoking	Hungary	men	2011	76.804
non-smoking	Hungary	men	2012	77.1567
non-smoking	Hungary	men	2013	77.3833
non-smoking	Hungary	men	2014	77.5515
non-alcohol	Hungary	men	1990	68.072
non-alcohol	Hungary	men	1991	68.0538
non-alcohol	Hungary	men	1992	67.7417
non-alcohol	Hungary	men	1993	67.7764
non-alcohol	Hungary	men	1994	68.1523
non-alcohol	Hungary	men	1995	68.5028
non-alcohol	Hungary	men	1996	69.2426
non-alcohol	Hungary	men	1997	69.5655
non-alcohol	Hungary	men	1998	69.3999
non-alcohol	Hungary	men	1999	69.5978
non-alcohol	Hungary	men	2000	70.2968
non-alcohol	Hungary	men	2001	70.9042
non-alcohol	Hungary	men	2002	70.9663
non-alcohol	Hungary	men	2003	70.9609
non-alcohol	Hungary	men	2004	71.2819
non-alcohol	Hungary	men	2005	71.2226
non-alcohol	Hungary	men	2006	71.6412
non-alcohol	Hungary	men	2007	71.7427
non-alcohol	Hungary	men	2008	72.2061
non-alcohol	Hungary	men	2009	72.41
non-alcohol	Hungary	men	2010	72.7725
non-alcohol	Hungary	men	2011	73.2711
non-alcohol	Hungary	men	2012	73.6134
non-alcohol	Hungary	men	2013	74.0957
non-alcohol	Hungary	men	2014	74.1945
non-obesity	Hungary	men	1975	66.9343
non-obesity	Hungary	men	1976	67.3124
non-obesity	Hungary	men	1977	67.4284
non-obesity	Hungary	men	1978	66.8495
non-obesity	Hungary	men	1979	66.9536
non-obesity	Hungary	men	1980	66.2919
non-obesity	Hungary	men	1981	66.296
non-obesity	Hungary	men	1982	66.4594
non-obesity	Hungary	men	1983	65.9316
non-obesity	Hungary	men	1984	65.8861
non-obesity	Hungary	men	1985	65.8843
non-obesity	Hungary	men	1986	66.1635
non-obesity	Hungary	men	1987	66.5474
non-obesity	Hungary	men	1988	67.02
non-obesity	Hungary	men	1989	66.3064
non-obesity	Hungary	men	1990	66.2484
non-obesity	Hungary	men	1991	66.2461
non-obesity	Hungary	men	1992	65.8517
non-obesity	Hungary	men	1993	65.8808
non-obesity	Hungary	men	1994	66.264
non-obesity	Hungary	men	1995	66.6927
non-obesity	Hungary	men	1996	67.5681
non-obesity	Hungary	men	1997	67.9364
non-obesity	Hungary	men	1998	67.7646
non-obesity	Hungary	men	1999	68.0176
non-obesity	Hungary	men	2000	68.852
non-obesity	Hungary	men	2001	69.5654
non-obesity	Hungary	men	2002	69.6893
non-obesity	Hungary	men	2003	69.7478
non-obesity	Hungary	men	2004	70.1242
non-obesity	Hungary	men	2005	70.1062
non-obesity	Hungary	men	2006	70.6033
non-obesity	Hungary	men	2007	70.8088
non-obesity	Hungary	men	2008	71.3953
non-obesity	Hungary	men	2009	71.7096
non-obesity	Hungary	men	2010	72.1768
non-obesity	Hungary	men	2011	72.7623
non-obesity	Hungary	men	2012	73.1747
non-obesity	Hungary	men	2013	73.7459
non-obesity	Hungary	men	2014	73.9223
non-lifestyle combined	Hungary	men	1990	74.3971
non-lifestyle combined	Hungary	men	1991	74.5053
non-lifestyle combined	Hungary	men	1992	74.5137
non-lifestyle combined	Hungary	men	1993	74.6238
non-lifestyle combined	Hungary	men	1994	75.1257
non-lifestyle combined	Hungary	men	1995	75.3408
non-lifestyle combined	Hungary	men	1996	76.0042
non-lifestyle combined	Hungary	men	1997	76.2763
non-lifestyle combined	Hungary	men	1998	76.1871
non-lifestyle combined	Hungary	men	1999	76.3443
non-lifestyle combined	Hungary	men	2000	76.8894
non-lifestyle combined	Hungary	men	2001	77.3892
non-lifestyle combined	Hungary	men	2002	77.3908
non-lifestyle combined	Hungary	men	2003	77.4566
non-lifestyle combined	Hungary	men	2004	77.7963
non-lifestyle combined	Hungary	men	2005	77.5309
non-lifestyle combined	Hungary	men	2006	77.9814
non-lifestyle combined	Hungary	men	2007	78.0905
non-lifestyle combined	Hungary	men	2008	78.4724
non-lifestyle combined	Hungary	men	2009	78.7244
non-lifestyle combined	Hungary	men	2010	79.0854
non-lifestyle combined	Hungary	men	2011	79.3523
non-lifestyle combined	Hungary	men	2012	79.6599
non-lifestyle combined	Hungary	men	2013	79.8423
non-lifestyle combined	Hungary	men	2014	80.0392
all-cause	Ireland	men	1950	64.4748
all-cause	Ireland	men	1951	63.4712
all-cause	Ireland	men	1952	65.7533
all-cause	Ireland	men	1953	66.6713
all-cause	Ireland	men	1954	66.4352
all-cause	Ireland	men	1955	66.4654
all-cause	Ireland	men	1956	67.3194
all-cause	Ireland	men	1957	67.4722
all-cause	Ireland	men	1958	67.5531
all-cause	Ireland	men	1959	67.5843
all-cause	Ireland	men	1960	68.4734
all-cause	Ireland	men	1961	67.8367
all-cause	Ireland	men	1962	67.9581
all-cause	Ireland	men	1963	68.278
all-cause	Ireland	men	1964	68.4779
all-cause	Ireland	men	1965	68.5476
all-cause	Ireland	men	1966	68.0876
all-cause	Ireland	men	1967	69.0698
all-cause	Ireland	men	1968	68.7196
all-cause	Ireland	men	1969	68.7183
all-cause	Ireland	men	1970	68.5811
all-cause	Ireland	men	1971	69.2878
all-cause	Ireland	men	1972	68.5904
all-cause	Ireland	men	1973	68.7135
all-cause	Ireland	men	1974	68.6323
all-cause	Ireland	men	1975	69.177
all-cause	Ireland	men	1976	69.3626
all-cause	Ireland	men	1977	69.492
all-cause	Ireland	men	1978	69.3519
all-cause	Ireland	men	1979	69.3861
all-cause	Ireland	men	1980	69.9332
all-cause	Ireland	men	1981	70.1597
all-cause	Ireland	men	1982	70.4706
all-cause	Ireland	men	1983	70.4063
all-cause	Ireland	men	1984	70.9167
all-cause	Ireland	men	1985	70.7563
all-cause	Ireland	men	1986	70.8435
all-cause	Ireland	men	1987	71.6445
all-cause	Ireland	men	1988	71.7099
all-cause	Ireland	men	1989	71.765
all-cause	Ireland	men	1990	72.1238
all-cause	Ireland	men	1991	72.2892
all-cause	Ireland	men	1992	72.6813
all-cause	Ireland	men	1993	72.5623
all-cause	Ireland	men	1994	73.06
all-cause	Ireland	men	1995	72.7741
all-cause	Ireland	men	1996	73.0952
all-cause	Ireland	men	1997	73.3849
all-cause	Ireland	men	1998	73.4062
all-cause	Ireland	men	1999	73.4282
all-cause	Ireland	men	2000	73.9427
all-cause	Ireland	men	2001	74.5005
all-cause	Ireland	men	2002	74.9749
all-cause	Ireland	men	2003	75.6565
all-cause	Ireland	men	2004	76.0237
all-cause	Ireland	men	2005	77.0659
all-cause	Ireland	men	2006	76.7909
all-cause	Ireland	men	2007	77.2481
all-cause	Ireland	men	2008	77.4682
all-cause	Ireland	men	2009	77.6598
all-cause	Ireland	men	2010	78.2593
all-cause	Ireland	men	2011	78.4445
all-cause	Ireland	men	2012	78.5767
all-cause	Ireland	men	2013	78.6924
all-cause	Ireland	men	2014	79.1563
non-smoking	Ireland	men	1950	65.7865
non-smoking	Ireland	men	1951	65.0873
non-smoking	Ireland	men	1952	67.4783
non-smoking	Ireland	men	1953	68.6489
non-smoking	Ireland	men	1954	68.3593
non-smoking	Ireland	men	1955	68.5826
non-smoking	Ireland	men	1956	69.6407
non-smoking	Ireland	men	1957	69.8501
non-smoking	Ireland	men	1958	69.7357
non-smoking	Ireland	men	1959	70.0058
non-smoking	Ireland	men	1960	71.0168
non-smoking	Ireland	men	1961	70.4873
non-smoking	Ireland	men	1962	70.7484
non-smoking	Ireland	men	1963	70.9115
non-smoking	Ireland	men	1964	71.2104
non-smoking	Ireland	men	1965	71.4214
non-smoking	Ireland	men	1966	71.2278
non-smoking	Ireland	men	1967	72.1662
non-smoking	Ireland	men	1968	72.1633
non-smoking	Ireland	men	1969	72.0881
non-smoking	Ireland	men	1970	72.2837
non-smoking	Ireland	men	1971	72.817
non-smoking	Ireland	men	1972	72.0335
non-smoking	Ireland	men	1973	72.4675
non-smoking	Ireland	men	1974	72.3489
non-smoking	Ireland	men	1975	72.9231
non-smoking	Ireland	men	1976	73.3233
non-smoking	Ireland	men	1977	73.3463
non-smoking	Ireland	men	1978	73.1816
non-smoking	Ireland	men	1979	73.1561
non-smoking	Ireland	men	1980	73.6208
non-smoking	Ireland	men	1981	74.0801
non-smoking	Ireland	men	1982	74.1174
non-smoking	Ireland	men	1983	74.4236
non-smoking	Ireland	men	1984	74.8286
non-smoking	Ireland	men	1985	74.6675
non-smoking	Ireland	men	1986	74.7296
non-smoking	Ireland	men	1987	75.2238
non-smoking	Ireland	men	1988	75.3973
non-smoking	Ireland	men	1989	75.173
non-smoking	Ireland	men	1990	75.5149
non-smoking	Ireland	men	1991	75.586
non-smoking	Ireland	men	1992	75.9257
non-smoking	Ireland	men	1993	76.0038
non-smoking	Ireland	men	1994	76.3096
non-smoking	Ireland	men	1995	75.7932
non-smoking	Ireland	men	1996	75.8377
non-smoking	Ireland	men	1997	75.9582
non-smoking	Ireland	men	1998	76.2351
non-smoking	Ireland	men	1999	75.9745
non-smoking	Ireland	men	2000	76.6199
non-smoking	Ireland	men	2001	77.0426
non-smoking	Ireland	men	2002	77.4052
non-smoking	Ireland	men	2003	78.0289
non-smoking	Ireland	men	2004	78.2978
non-smoking	Ireland	men	2005	79.166
non-smoking	Ireland	men	2006	79.0152
non-smoking	Ireland	men	2007	79.4551
non-smoking	Ireland	men	2008	79.5095
non-smoking	Ireland	men	2009	79.8332
non-smoking	Ireland	men	2010	80.1009
non-smoking	Ireland	men	2011	80.423
non-smoking	Ireland	men	2012	80.4046
non-smoking	Ireland	men	2013	80.5081
non-smoking	Ireland	men	2014	80.8945
non-alcohol	Ireland	men	1990	72.8695
non-alcohol	Ireland	men	1991	73.101
non-alcohol	Ireland	men	1992	73.5325
non-alcohol	Ireland	men	1993	73.4539
non-alcohol	Ireland	men	1994	73.9975
non-alcohol	Ireland	men	1995	73.7516
non-alcohol	Ireland	men	1996	74.1374
non-alcohol	Ireland	men	1997	74.4766
non-alcohol	Ireland	men	1998	74.5444
non-alcohol	Ireland	men	1999	74.5726
non-alcohol	Ireland	men	2000	75.1099
non-alcohol	Ireland	men	2001	75.6503
non-alcohol	Ireland	men	2002	76.1178
non-alcohol	Ireland	men	2003	76.7281
non-alcohol	Ireland	men	2004	77.085
non-alcohol	Ireland	men	2005	78.1291
non-alcohol	Ireland	men	2006	77.8107
non-alcohol	Ireland	men	2007	78.2673
non-alcohol	Ireland	men	2008	78.4724
non-alcohol	Ireland	men	2009	78.6902
non-alcohol	Ireland	men	2010	79.2011
non-alcohol	Ireland	men	2011	79.392
non-alcohol	Ireland	men	2012	79.4975
non-alcohol	Ireland	men	2013	79.5727
non-alcohol	Ireland	men	2014	80.0135
non-obesity	Ireland	men	1975	69.5344
non-obesity	Ireland	men	1976	69.7287
non-obesity	Ireland	men	1977	69.875
non-obesity	Ireland	men	1978	69.7586
non-obesity	Ireland	men	1979	69.8094
non-obesity	Ireland	men	1980	70.3741
non-obesity	Ireland	men	1981	70.6132
non-obesity	Ireland	men	1982	70.9415
non-obesity	Ireland	men	1983	70.8969
non-obesity	Ireland	men	1984	71.4222
non-obesity	Ireland	men	1985	71.2764
non-obesity	Ireland	men	1986	71.3755
non-obesity	Ireland	men	1987	72.2022
non-obesity	Ireland	men	1988	72.2824
non-obesity	Ireland	men	1989	72.3594
non-obesity	Ireland	men	1990	72.7329
non-obesity	Ireland	men	1991	72.9259
[truncated: 1,706 more rows]
