# Supplementary material for: Future life expectancy in Europe taking into account the impact of smoking, obesity, and alcohol
Source: eLife. 2021 Jul 6;10:e66590. doi: 10.7554/eLife.66590 (PMC8337079; doi:10.7554/eLife.66590)
Supplement: Figure 3—figure supplement 1—source data 1. [file elife-66590-fig3-figsupp1-data1.xlsx]

## Sheet: data
lifestyle	country	sex	year	lower95	median	upper95	method	type	model	HMD_code	projection
all-cause (direct)	Austria	Men	1990		72.226		Observed	e0	LC	AUT	Observed
all-cause (direct)	Austria	Men	1991		72.2614		Observed	e0	LC	AUT	Observed
all-cause (direct)	Austria	Men	1992		72.5066		Observed	e0	LC	AUT	Observed
all-cause (direct)	Austria	Men	1993		72.7598		Observed	e0	LC	AUT	Observed
all-cause (direct)	Austria	Men	1994		73.1152		Observed	e0	LC	AUT	Observed
all-cause (direct)	Austria	Men	1995		73.2937		Observed	e0	LC	AUT	Observed
all-cause (direct)	Austria	Men	1996		73.6596		Observed	e0	LC	AUT	Observed
all-cause (direct)	Austria	Men	1997		74.0153		Observed	e0	LC	AUT	Observed
all-cause (direct)	Austria	Men	1998		74.4407		Observed	e0	LC	AUT	Observed
all-cause (direct)	Austria	Men	1999		74.7757		Observed	e0	LC	AUT	Observed
all-cause (direct)	Austria	Men	2000		75.0937		Observed	e0	LC	AUT	Observed
all-cause (direct)	Austria	Men	2001		75.5877		Observed	e0	LC	AUT	Observed
all-cause (direct)	Austria	Men	2002		75.7732		Observed	e0	LC	AUT	Observed
all-cause (direct)	Austria	Men	2003		75.9121		Observed	e0	LC	AUT	Observed
all-cause (direct)	Austria	Men	2004		76.3892		Observed	e0	LC	AUT	Observed
all-cause (direct)	Austria	Men	2005		76.6179		Observed	e0	LC	AUT	Observed
all-cause (direct)	Austria	Men	2006		77.0736		Observed	e0	LC	AUT	Observed
all-cause (direct)	Austria	Men	2007		77.2896		Observed	e0	LC	AUT	Observed
all-cause (direct)	Austria	Men	2008		77.5835		Observed	e0	LC	AUT	Observed
all-cause (direct)	Austria	Men	2009		77.3954		Observed	e0	LC	AUT	Observed
all-cause (direct)	Austria	Men	2010		77.6562		Observed	e0	LC	AUT	Observed
all-cause (direct)	Austria	Men	2011		78.0773		Observed	e0	LC	AUT	Observed
all-cause (direct)	Austria	Men	2012		78.2584		Observed	e0	LC	AUT	Observed
all-cause (direct)	Austria	Men	2013		78.4558		Observed	e0	LC	AUT	Observed
all-cause (direct)	Austria	Men	2014		78.9134		Observed	e0	LC	AUT	Observed
all-cause (direct)	Austria	Men	2015	78.9409	79.3802	79.805	Projected	e0	LC	AUT	Lee-Carter projection
all-cause (direct)	Austria	Men	2016	79.0885	79.623	80.1353	Projected	e0	LC	AUT	Lee-Carter projection
all-cause (direct)	Austria	Men	2017	79.2521	79.8624	80.4485	Projected	e0	LC	AUT	Lee-Carter projection
all-cause (direct)	Austria	Men	2018	79.42	80.0997	80.7544	Projected	e0	LC	AUT	Lee-Carter projection
all-cause (direct)	Austria	Men	2019	79.5997	80.3327	81.0467	Projected	e0	LC	AUT	Lee-Carter projection
all-cause (direct)	Austria	Men	2020	79.7836	80.5688	81.3278	Projected	e0	LC	AUT	Lee-Carter projection
all-cause (direct)	Austria	Men	2021	79.969	80.7997	81.5979	Projected	e0	LC	AUT	Lee-Carter projection
all-cause (direct)	Austria	Men	2022	80.151	81.0284	81.8764	Projected	e0	LC	AUT	Lee-Carter projection
all-cause (direct)	Austria	Men	2023	80.3414	81.2556	82.1401	Projected	e0	LC	AUT	Lee-Carter projection
all-cause (direct)	Austria	Men	2024	80.538	81.4784	82.3922	Projected	e0	LC	AUT	Lee-Carter projection
all-cause (direct)	Austria	Men	2025	80.7294	81.7017	82.6402	Projected	e0	LC	AUT	Lee-Carter projection
all-cause (direct)	Austria	Men	2026	80.9145	81.9231	82.8885	Projected	e0	LC	AUT	Lee-Carter projection
all-cause (direct)	Austria	Men	2027	81.1003	82.1413	83.1344	Projected	e0	LC	AUT	Lee-Carter projection
all-cause (direct)	Austria	Men	2028	81.2864	82.3546	83.372	Projected	e0	LC	AUT	Lee-Carter projection
all-cause (direct)	Austria	Men	2029	81.4673	82.5674	83.6138	Projected	e0	LC	AUT	Lee-Carter projection
all-cause (direct)	Austria	Men	2030	81.656	82.7818	83.8369	Projected	e0	LC	AUT	Lee-Carter projection
all-cause (direct)	Austria	Men	2031	81.8452	82.9939	84.0693	Projected	e0	LC	AUT	Lee-Carter projection
all-cause (direct)	Austria	Men	2032	82.0388	83.1997	84.2894	Projected	e0	LC	AUT	Lee-Carter projection
all-cause (direct)	Austria	Men	2033	82.2238	83.4055	84.5128	Projected	e0	LC	AUT	Lee-Carter projection
all-cause (direct)	Austria	Men	2034	82.4102	83.6063	84.7302	Projected	e0	LC	AUT	Lee-Carter projection
all-cause (direct)	Austria	Men	2035	82.5953	83.8077	84.944	Projected	e0	LC	AUT	Lee-Carter projection
all-cause (direct)	Austria	Men	2036	82.7747	84.0047	85.1547	Projected	e0	LC	AUT	Lee-Carter projection
all-cause (direct)	Austria	Men	2037	82.9606	84.2048	85.3615	Projected	e0	LC	AUT	Lee-Carter projection
all-cause (direct)	Austria	Men	2038	83.1394	84.396	85.5642	Projected	e0	LC	AUT	Lee-Carter projection
all-cause (direct)	Austria	Men	2039	83.3221	84.588	85.7711	Projected	e0	LC	AUT	Lee-Carter projection
all-cause (direct)	Austria	Men	2040	83.5016	84.7797	85.9659	Projected	e0	LC	AUT	Lee-Carter projection
all-cause (direct)	Austria	Men	2041	83.6803	84.9648	86.1627	Projected	e0	LC	AUT	Lee-Carter projection
all-cause (direct)	Austria	Men	2042	83.8505	85.1499	86.3582	Projected	e0	LC	AUT	Lee-Carter projection
all-cause (direct)	Austria	Men	2043	84.0285	85.3349	86.5429	Projected	e0	LC	AUT	Lee-Carter projection
all-cause (direct)	Austria	Men	2044	84.2025	85.5172	86.7348	Projected	e0	LC	AUT	Lee-Carter projection
all-cause (direct)	Austria	Men	2045	84.3742	85.6962	86.9185	Projected	e0	LC	AUT	Lee-Carter projection
all-cause (direct)	Austria	Men	2046	84.5428	85.8736	87.098	Projected	e0	LC	AUT	Lee-Carter projection
all-cause (direct)	Austria	Men	2047	84.7217	86.0516	87.2855	Projected	e0	LC	AUT	Lee-Carter projection
all-cause (direct)	Austria	Men	2048	84.891	86.2248	87.4615	Projected	e0	LC	AUT	Lee-Carter projection
all-cause (direct)	Austria	Men	2049	85.0562	86.398	87.6424	Projected	e0	LC	AUT	Lee-Carter projection
all-cause (direct)	Austria	Men	2050	85.2203	86.5689	87.8128	Projected	e0	LC	AUT	Lee-Carter projection
all-cause (direct)	Austria	Men	2051	85.3855	86.7374	87.9811	Projected	e0	LC	AUT	Lee-Carter projection
all-cause (direct)	Austria	Men	2052	85.5392	86.9037	88.147	Projected	e0	LC	AUT	Lee-Carter projection
all-cause (direct)	Austria	Men	2053	85.7037	87.0683	88.3075	Projected	e0	LC	AUT	Lee-Carter projection
all-cause (direct)	Austria	Men	2054	85.8682	87.2297	88.4754	Projected	e0	LC	AUT	Lee-Carter projection
all-cause (direct)	Austria	Men	2055	86.0233	87.3931	88.6374	Projected	e0	LC	AUT	Lee-Carter projection
all-cause (direct)	Austria	Men	2056	86.1784	87.5509	88.7911	Projected	e0	LC	AUT	Lee-Carter projection
all-cause (direct)	Austria	Men	2057	86.3436	87.7111	88.9481	Projected	e0	LC	AUT	Lee-Carter projection
all-cause (direct)	Austria	Men	2058	86.4953	87.8639	89.1002	Projected	e0	LC	AUT	Lee-Carter projection
all-cause (direct)	Austria	Men	2059	86.6401	88.0173	89.2554	Projected	e0	LC	AUT	Lee-Carter projection
all-cause (direct)	Austria	Men	2060	86.7999	88.17	89.4043	Projected	e0	LC	AUT	Lee-Carter projection
all-cause (direct)	Austria	Men	2061	86.9567	88.3238	89.549	Projected	e0	LC	AUT	Lee-Carter projection
all-cause (direct)	Austria	Men	2062	87.0985	88.4728	89.7006	Projected	e0	LC	AUT	Lee-Carter projection
all-cause (direct)	Austria	Men	2063	87.2521	88.6184	89.8472	Projected	e0	LC	AUT	Lee-Carter projection
all-cause (direct)	Austria	Men	2064	87.4007	88.7634	89.9896	Projected	e0	LC	AUT	Lee-Carter projection
all-cause (direct)	Austria	Men	2065	87.5468	88.9062	90.1252	Projected	e0	LC	AUT	Lee-Carter projection
all-cause (indirect)	Austria	Men	2015	78.6009	79.4709	80.2901	Projected	e0	LL	AUT	Our projection
all-cause (indirect)	Austria	Men	2016	78.7103	79.7598	80.7272	Projected	e0	LL	AUT	Our projection
all-cause (indirect)	Austria	Men	2017	78.8893	80.0573	81.1299	Projected	e0	LL	AUT	Our projection
all-cause (indirect)	Austria	Men	2018	79.0461	80.3432	81.5206	Projected	e0	LL	AUT	Our projection
all-cause (indirect)	Austria	Men	2019	79.2469	80.6357	81.8944	Projected	e0	LL	AUT	Our projection
all-cause (indirect)	Austria	Men	2020	79.4479	80.9134	82.2444	Projected	e0	LL	AUT	Our projection
all-cause (indirect)	Austria	Men	2021	79.6391	81.1947	82.5868	Projected	e0	LL	AUT	Our projection
all-cause (indirect)	Austria	Men	2022	79.8498	81.4733	82.9069	Projected	e0	LL	AUT	Our projection
all-cause (indirect)	Austria	Men	2023	80.0607	81.7392	83.2218	Projected	e0	LL	AUT	Our projection
all-cause (indirect)	Austria	Men	2024	80.2771	82.0037	83.5286	Projected	e0	LL	AUT	Our projection
all-cause (indirect)	Austria	Men	2025	80.4855	82.266	83.8258	Projected	e0	LL	AUT	Our projection
all-cause (indirect)	Austria	Men	2026	80.6799	82.5205	84.1346	Projected	e0	LL	AUT	Our projection
all-cause (indirect)	Austria	Men	2027	80.8983	82.7698	84.4112	Projected	e0	LL	AUT	Our projection
all-cause (indirect)	Austria	Men	2028	81.11	83.0274	84.6966	Projected	e0	LL	AUT	Our projection
all-cause (indirect)	Austria	Men	2029	81.3112	83.2723	84.9608	Projected	e0	LL	AUT	Our projection
all-cause (indirect)	Austria	Men	2030	81.5244	83.519	85.2214	Projected	e0	LL	AUT	Our projection
all-cause (indirect)	Austria	Men	2031	81.7233	83.7612	85.4821	Projected	e0	LL	AUT	Our projection
all-cause (indirect)	Austria	Men	2032	81.9203	83.9919	85.7514	Projected	e0	LL	AUT	Our projection
all-cause (indirect)	Austria	Men	2033	82.1296	84.2266	85.9806	Projected	e0	LL	AUT	Our projection
all-cause (indirect)	Austria	Men	2034	82.3468	84.4604	86.2406	Projected	e0	LL	AUT	Our projection
all-cause (indirect)	Austria	Men	2035	82.5533	84.6844	86.4773	Projected	e0	LL	AUT	Our projection
all-cause (indirect)	Austria	Men	2036	82.7628	84.9103	86.7049	Projected	e0	LL	AUT	Our projection
all-cause (indirect)	Austria	Men	2037	82.9539	85.1278	86.9487	Projected	e0	LL	AUT	Our projection
all-cause (indirect)	Austria	Men	2038	83.1679	85.3493	87.1789	Projected	e0	LL	AUT	Our projection
all-cause (indirect)	Austria	Men	2039	83.3657	85.5714	87.4056	Projected	e0	LL	AUT	Our projection
all-cause (indirect)	Austria	Men	2040	83.5657	85.7849	87.618	Projected	e0	LL	AUT	Our projection
all-cause (indirect)	Austria	Men	2041	83.7844	85.9953	87.8307	Projected	e0	LL	AUT	Our projection
all-cause (indirect)	Austria	Men	2042	83.9631	86.2038	88.0391	Projected	e0	LL	AUT	Our projection
all-cause (indirect)	Austria	Men	2043	84.1474	86.4126	88.2464	Projected	e0	LL	AUT	Our projection
all-cause (indirect)	Austria	Men	2044	84.3558	86.6167	88.4564	Projected	e0	LL	AUT	Our projection
all-cause (indirect)	Austria	Men	2045	84.5597	86.8207	88.6628	Projected	e0	LL	AUT	Our projection
all-cause (indirect)	Austria	Men	2046	84.7464	87.0189	88.8607	Projected	e0	LL	AUT	Our projection
all-cause (indirect)	Austria	Men	2047	84.9379	87.2148	89.0703	Projected	e0	LL	AUT	Our projection
all-cause (indirect)	Austria	Men	2048	85.1319	87.4069	89.253	Projected	e0	LL	AUT	Our projection
all-cause (indirect)	Austria	Men	2049	85.314	87.6028	89.4401	Projected	e0	LL	AUT	Our projection
all-cause (indirect)	Austria	Men	2050	85.4933	87.7875	89.6269	Projected	e0	LL	AUT	Our projection
all-cause (indirect)	Austria	Men	2051	85.7004	87.9795	89.8124	Projected	e0	LL	AUT	Our projection
all-cause (indirect)	Austria	Men	2052	85.8875	88.1644	89.9892	Projected	e0	LL	AUT	Our projection
all-cause (indirect)	Austria	Men	2053	86.0614	88.3457	90.1755	Projected	e0	LL	AUT	Our projection
all-cause (indirect)	Austria	Men	2054	86.25	88.5236	90.3478	Projected	e0	LL	AUT	Our projection
all-cause (indirect)	Austria	Men	2055	86.436	88.7077	90.5165	Projected	e0	LL	AUT	Our projection
all-cause (indirect)	Austria	Men	2056	86.6064	88.8868	90.695	Projected	e0	LL	AUT	Our projection
all-cause (indirect)	Austria	Men	2057	86.7918	89.0564	90.8669	Projected	e0	LL	AUT	Our projection
all-cause (indirect)	Austria	Men	2058	86.9835	89.2318	91.0334	Projected	e0	LL	AUT	Our projection
all-cause (indirect)	Austria	Men	2059	87.1506	89.4048	91.2003	Projected	e0	LL	AUT	Our projection
all-cause (indirect)	Austria	Men	2060	87.3301	89.5683	91.3634	Projected	e0	LL	AUT	Our projection
all-cause (indirect)	Austria	Men	2061	87.4925	89.734	91.5303	Projected	e0	LL	AUT	Our projection
all-cause (indirect)	Austria	Men	2062	87.6778	89.897	91.6756	Projected	e0	LL	AUT	Our projection
all-cause (indirect)	Austria	Men	2063	87.8475	90.063	91.8301	Projected	e0	LL	AUT	Our projection
all-cause (indirect)	Austria	Men	2064	88.0101	90.2253	91.9848	Projected	e0	LL	AUT	Our projection
all-cause (indirect)	Austria	Men	2065	88.1771	90.3791	92.1371	Projected	e0	LL	AUT	Our projection
all-cause (direct)	Belgium	Men	1990		72.6959		Observed	e0	LC	BEL	Observed
all-cause (direct)	Belgium	Men	1991		72.8459		Observed	e0	LC	BEL	Observed
all-cause (direct)	Belgium	Men	1992		72.9736		Observed	e0	LC	BEL	Observed
all-cause (direct)	Belgium	Men	1993		72.94		Observed	e0	LC	BEL	Observed
all-cause (direct)	Belgium	Men	1994		73.3489		Observed	e0	LC	BEL	Observed
all-cause (direct)	Belgium	Men	1995		73.4316		Observed	e0	LC	BEL	Observed
all-cause (direct)	Belgium	Men	1996		73.8299		Observed	e0	LC	BEL	Observed
all-cause (direct)	Belgium	Men	1997		74.1561		Observed	e0	LC	BEL	Observed
all-cause (direct)	Belgium	Men	1998		74.2954		Observed	e0	LC	BEL	Observed
all-cause (direct)	Belgium	Men	1999		74.3633		Observed	e0	LC	BEL	Observed
all-cause (direct)	Belgium	Men	2000		74.5643		Observed	e0	LC	BEL	Observed
all-cause (direct)	Belgium	Men	2001		74.9174		Observed	e0	LC	BEL	Observed
all-cause (direct)	Belgium	Men	2002		75.0788		Observed	e0	LC	BEL	Observed
all-cause (direct)	Belgium	Men	2003		75.3583		Observed	e0	LC	BEL	Observed
all-cause (direct)	Belgium	Men	2004		75.969		Observed	e0	LC	BEL	Observed
all-cause (direct)	Belgium	Men	2005		76.1442		Observed	e0	LC	BEL	Observed
all-cause (direct)	Belgium	Men	2006		76.5178		Observed	e0	LC	BEL	Observed
all-cause (direct)	Belgium	Men	2007		76.7381		Observed	e0	LC	BEL	Observed
all-cause (direct)	Belgium	Men	2008		76.769		Observed	e0	LC	BEL	Observed
all-cause (direct)	Belgium	Men	2009		77.1593		Observed	e0	LC	BEL	Observed
all-cause (direct)	Belgium	Men	2010		77.3748		Observed	e0	LC	BEL	Observed
all-cause (direct)	Belgium	Men	2011		77.7662		Observed	e0	LC	BEL	Observed
all-cause (direct)	Belgium	Men	2012		77.6319		Observed	e0	LC	BEL	Observed
all-cause (direct)	Belgium	Men	2013		77.9477		Observed	e0	LC	BEL	Observed
all-cause (direct)	Belgium	Men	2014		78.5727		Observed	e0	LC	BEL	Observed
all-cause (direct)	Belgium	Men	2015	78.4782	79.0176	79.5523	Projected	e0	LC	BEL	Lee-Carter projection
all-cause (direct)	Belgium	Men	2016	78.5718	79.2377	79.8817	Projected	e0	LC	BEL	Lee-Carter projection
all-cause (direct)	Belgium	Men	2017	78.7017	79.4543	80.1904	Projected	e0	LC	BEL	Lee-Carter projection
all-cause (direct)	Belgium	Men	2018	78.8286	79.6728	80.4837	Projected	e0	LC	BEL	Lee-Carter projection
all-cause (direct)	Belgium	Men	2019	78.9685	79.8858	80.7631	Projected	e0	LC	BEL	Lee-Carter projection
all-cause (direct)	Belgium	Men	2020	79.1182	80.0955	81.0299	Projected	e0	LC	BEL	Lee-Carter projection
all-cause (direct)	Belgium	Men	2021	79.2644	80.3045	81.2965	Projected	e0	LC	BEL	Lee-Carter projection
all-cause (direct)	Belgium	Men	2022	79.4175	80.5128	81.5544	Projected	e0	LC	BEL	Lee-Carter projection
all-cause (direct)	Belgium	Men	2023	79.5741	80.7189	81.8071	Projected	e0	LC	BEL	Lee-Carter projection
all-cause (direct)	Belgium	Men	2024	79.7208	80.9247	82.0486	Projected	e0	LC	BEL	Lee-Carter projection
all-cause (direct)	Belgium	Men	2025	79.8799	81.1239	82.2804	Projected	e0	LC	BEL	Lee-Carter projection
all-cause (direct)	Belgium	Men	2026	80.0436	81.3247	82.5155	Projected	e0	LC	BEL	Lee-Carter projection
all-cause (direct)	Belgium	Men	2027	80.2025	81.5242	82.7404	Projected	e0	LC	BEL	Lee-Carter projection
all-cause (direct)	Belgium	Men	2028	80.3708	81.721	82.9764	Projected	e0	LC	BEL	Lee-Carter projection
all-cause (direct)	Belgium	Men	2029	80.5338	81.9159	83.1982	Projected	e0	LC	BEL	Lee-Carter projection
all-cause (direct)	Belgium	Men	2030	80.6943	82.1074	83.4139	Projected	e0	LC	BEL	Lee-Carter projection
all-cause (direct)	Belgium	Men	2031	80.8576	82.2981	83.6409	Projected	e0	LC	BEL	Lee-Carter projection
all-cause (direct)	Belgium	Men	2032	81.0168	82.4889	83.8487	Projected	e0	LC	BEL	Lee-Carter projection
all-cause (direct)	Belgium	Men	2033	81.1867	82.6721	84.0491	Projected	e0	LC	BEL	Lee-Carter projection
all-cause (direct)	Belgium	Men	2034	81.3414	82.8566	84.2515	Projected	e0	LC	BEL	Lee-Carter projection
all-cause (direct)	Belgium	Men	2035	81.5126	83.0406	84.4589	Projected	e0	LC	BEL	Lee-Carter projection
all-cause (direct)	Belgium	Men	2036	81.6638	83.2248	84.6545	Projected	e0	LC	BEL	Lee-Carter projection
all-cause (direct)	Belgium	Men	2037	81.8325	83.406	84.8535	Projected	e0	LC	BEL	Lee-Carter projection
all-cause (direct)	Belgium	Men	2038	81.9919	83.5832	85.0444	Projected	e0	LC	BEL	Lee-Carter projection
all-cause (direct)	Belgium	Men	2039	82.1503	83.763	85.2348	Projected	e0	LC	BEL	Lee-Carter projection
all-cause (direct)	Belgium	Men	2040	82.3291	83.939	85.4164	Projected	e0	LC	BEL	Lee-Carter projection
all-cause (direct)	Belgium	Men	2041	82.4758	84.1105	85.6056	Projected	e0	LC	BEL	Lee-Carter projection
all-cause (direct)	Belgium	Men	2042	82.6272	84.2824	85.7881	Projected	e0	LC	BEL	Lee-Carter projection
all-cause (direct)	Belgium	Men	2043	82.7809	84.4528	85.9669	Projected	e0	LC	BEL	Lee-Carter projection
all-cause (direct)	Belgium	Men	2044	82.9407	84.618	86.1394	Projected	e0	LC	BEL	Lee-Carter projection
all-cause (direct)	Belgium	Men	2045	83.0892	84.7876	86.3121	Projected	e0	LC	BEL	Lee-Carter projection
all-cause (direct)	Belgium	Men	2046	83.2406	84.9551	86.4823	Projected	e0	LC	BEL	Lee-Carter projection
all-cause (direct)	Belgium	Men	2047	83.3921	85.1155	86.6429	Projected	e0	LC	BEL	Lee-Carter projection
all-cause (direct)	Belgium	Men	2048	83.5417	85.2775	86.8131	Projected	e0	LC	BEL	Lee-Carter projection
all-cause (direct)	Belgium	Men	2049	83.7003	85.4356	86.9716	Projected	e0	LC	BEL	Lee-Carter projection
all-cause (direct)	Belgium	Men	2050	83.8425	85.595	87.1332	Projected	e0	LC	BEL	Lee-Carter projection
all-cause (direct)	Belgium	Men	2051	83.998	85.7502	87.2923	Projected	e0	LC	BEL	Lee-Carter projection
all-cause (direct)	Belgium	Men	2052	84.1376	85.9048	87.4498	Projected	e0	LC	BEL	Lee-Carter projection
all-cause (direct)	Belgium	Men	2053	84.2881	86.0585	87.6087	Projected	e0	LC	BEL	Lee-Carter projection
all-cause (direct)	Belgium	Men	2054	84.4344	86.2091	87.7584	Projected	e0	LC	BEL	Lee-Carter projection
all-cause (direct)	Belgium	Men	2055	84.5797	86.3608	87.9127	Projected	e0	LC	BEL	Lee-Carter projection
all-cause (direct)	Belgium	Men	2056	84.7102	86.5059	88.0601	Projected	e0	LC	BEL	Lee-Carter projection
all-cause (direct)	Belgium	Men	2057	84.8634	86.6535	88.2036	Projected	e0	LC	BEL	Lee-Carter projection
all-cause (direct)	Belgium	Men	2058	85.013	86.7969	88.3496	Projected	e0	LC	BEL	Lee-Carter projection
all-cause (direct)	Belgium	Men	2059	85.1536	86.9388	88.4907	Projected	e0	LC	BEL	Lee-Carter projection
all-cause (direct)	Belgium	Men	2060	85.2944	87.0801	88.6334	Projected	e0	LC	BEL	Lee-Carter projection
all-cause (direct)	Belgium	Men	2061	85.4313	87.2179	88.7663	Projected	e0	LC	BEL	Lee-Carter projection
all-cause (direct)	Belgium	Men	2062	85.5754	87.3565	88.904	Projected	e0	LC	BEL	Lee-Carter projection
all-cause (direct)	Belgium	Men	2063	85.7029	87.492	89.0391	Projected	e0	LC	BEL	Lee-Carter projection
all-cause (direct)	Belgium	Men	2064	85.849	87.6283	89.1693	Projected	e0	LC	BEL	Lee-Carter projection
all-cause (direct)	Belgium	Men	2065	85.9784	87.763	89.3023	Projected	e0	LC	BEL	Lee-Carter projection
all-cause (indirect)	Belgium	Men	2015	78.5421	79.5075	80.4346	Projected	e0	LL	BEL	Our projection
all-cause (indirect)	Belgium	Men	2016	78.7377	79.9469	81.1002	Projected	e0	LL	BEL	Our projection
all-cause (indirect)	Belgium	Men	2017	78.9218	80.278	81.5556	Projected	e0	LL	BEL	Our projection
all-cause (indirect)	Belgium	Men	2018	79.1391	80.6359	82.0267	Projected	e0	LL	BEL	Our projection
all-cause (indirect)	Belgium	Men	2019	79.3591	80.9772	82.4767	Projected	e0	LL	BEL	Our projection
all-cause (indirect)	Belgium	Men	2020	79.5984	81.3197	82.8904	Projected	e0	LL	BEL	Our projection
all-cause (indirect)	Belgium	Men	2021	79.8402	81.6504	83.308	Projected	e0	LL	BEL	Our projection
all-cause (indirect)	Belgium	Men	2022	80.0908	81.9809	83.6861	Projected	e0	LL	BEL	Our projection
all-cause (indirect)	Belgium	Men	2023	80.343	82.2995	84.0712	Projected	e0	LL	BEL	Our projection
all-cause (indirect)	Belgium	Men	2024	80.588	82.61	84.4283	Projected	e0	LL	BEL	Our projection
all-cause (indirect)	Belgium	Men	2025	80.8246	82.9195	84.7693	Projected	e0	LL	BEL	Our projection
all-cause (indirect)	Belgium	Men	2026	81.0847	83.213	85.1084	Projected	e0	LL	BEL	Our projection
all-cause (indirect)	Belgium	Men	2027	81.3393	83.5032	85.421	Projected	e0	LL	BEL	Our projection
all-cause (indirect)	Belgium	Men	2028	81.5729	83.782	85.738	Projected	e0	LL	BEL	Our projection
all-cause (indirect)	Belgium	Men	2029	81.8099	84.0506	86.0472	Projected	e0	LL	BEL	Our projection
all-cause (indirect)	Belgium	Men	2030	82.0529	84.322	86.3307	Projected	e0	LL	BEL	Our projection
all-cause (indirect)	Belgium	Men	2031	82.2822	84.5811	86.6139	Projected	e0	LL	BEL	Our projection
all-cause (indirect)	Belgium	Men	2032	82.5135	84.8358	86.894	Projected	e0	LL	BEL	Our projection
all-cause (indirect)	Belgium	Men	2033	82.7371	85.0815	87.1631	Projected	e0	LL	BEL	Our projection
all-cause (indirect)	Belgium	Men	2034	82.9443	85.3196	87.4038	Projected	e0	LL	BEL	Our projection
all-cause (indirect)	Belgium	Men	2035	83.1517	85.5554	87.6434	Projected	e0	LL	BEL	Our projection
all-cause (indirect)	Belgium	Men	2036	83.3807	85.7863	87.8954	Projected	e0	LL	BEL	Our projection
all-cause (indirect)	Belgium	Men	2037	83.5649	86.0076	88.1286	Projected	e0	LL	BEL	Our projection
all-cause (indirect)	Belgium	Men	2038	83.7617	86.2238	88.3654	Projected	e0	LL	BEL	Our projection
all-cause (indirect)	Belgium	Men	2039	83.959	86.4384	88.5874	Projected	e0	LL	BEL	Our projection
all-cause (indirect)	Belgium	Men	2040	84.1584	86.6442	88.8098	Projected	e0	LL	BEL	Our projection
all-cause (indirect)	Belgium	Men	2041	84.3544	86.8422	89.0343	Projected	e0	LL	BEL	Our projection
all-cause (indirect)	Belgium	Men	2042	84.5274	87.0496	89.2368	Projected	e0	LL	BEL	Our projection
all-cause (indirect)	Belgium	Men	2043	84.7114	87.2484	89.4409	Projected	e0	LL	BEL	Our projection
all-cause (indirect)	Belgium	Men	2044	84.8976	87.4368	89.6483	Projected	e0	LL	BEL	Our projection
all-cause (indirect)	Belgium	Men	2045	85.0692	87.6276	89.8474	Projected	e0	LL	BEL	Our projection
all-cause (indirect)	Belgium	Men	2046	85.2582	87.8143	90.0306	Projected	e0	LL	BEL	Our projection
all-cause (indirect)	Belgium	Men	2047	85.4265	87.9971	90.2181	Projected	e0	LL	BEL	Our projection
all-cause (indirect)	Belgium	Men	2048	85.6017	88.1742	90.4221	Projected	e0	LL	BEL	Our projection
all-cause (indirect)	Belgium	Men	2049	85.7512	88.3563	90.606	Projected	e0	LL	BEL	Our projection
all-cause (indirect)	Belgium	Men	2050	85.9354	88.5375	90.7858	Projected	e0	LL	BEL	Our projection
all-cause (indirect)	Belgium	Men	2051	86.1126	88.7078	90.9592	Projected	e0	LL	BEL	Our projection
all-cause (indirect)	Belgium	Men	2052	86.2865	88.8865	91.149	Projected	e0	LL	BEL	Our projection
all-cause (indirect)	Belgium	Men	2053	86.4353	89.0567	91.3198	Projected	e0	LL	BEL	Our projection
all-cause (indirect)	Belgium	Men	2054	86.5992	89.2241	91.4752	Projected	e0	LL	BEL	Our projection
all-cause (indirect)	Belgium	Men	2055	86.7585	89.3866	91.641	Projected	e0	LL	BEL	Our projection
all-cause (indirect)	Belgium	Men	2056	86.9195	89.553	91.8084	Projected	e0	LL	BEL	Our projection
all-cause (indirect)	Belgium	Men	2057	87.0774	89.7137	91.9777	Projected	e0	LL	BEL	Our projection
all-cause (indirect)	Belgium	Men	2058	87.2304	89.872	92.1324	Projected	e0	LL	BEL	Our projection
all-cause (indirect)	Belgium	Men	2059	87.3713	90.0294	92.2852	Projected	e0	LL	BEL	Our projection
all-cause (indirect)	Belgium	Men	2060	87.5405	90.1811	92.4356	Projected	e0	LL	BEL	Our projection
all-cause (indirect)	Belgium	Men	2061	87.6946	90.3321	92.5954	Projected	e0	LL	BEL	Our projection
all-cause (indirect)	Belgium	Men	2062	87.8398	90.4851	92.7421	Projected	e0	LL	BEL	Our projection
all-cause (indirect)	Belgium	Men	2063	87.9933	90.6352	92.8859	Projected	e0	LL	BEL	Our projection
all-cause (indirect)	Belgium	Men	2064	88.1344	90.7778	93.0331	Projected	e0	LL	BEL	Our projection
all-cause (indirect)	Belgium	Men	2065	88.2975	90.9276	93.1675	Projected	e0	LL	BEL	Our projection
all-cause (direct)	Czech Republic	Men	1990		67.5308		Observed	e0	LC	CZE	Observed
all-cause (direct)	Czech Republic	Men	1991		68.2322		Observed	e0	LC	CZE	Observed
all-cause (direct)	Czech Republic	Men	1992		68.5215		Observed	e0	LC	CZE	Observed
all-cause (direct)	Czech Republic	Men	1993		69.2473		Observed	e0	LC	CZE	Observed
all-cause (direct)	Czech Republic	Men	1994		69.4891		Observed	e0	LC	CZE	Observed
all-cause (direct)	Czech Republic	Men	1995		69.6644		Observed	e0	LC	CZE	Observed
all-cause (direct)	Czech Republic	Men	1996		70.3055		Observed	e0	LC	CZE	Observed
all-cause (direct)	Czech Republic	Men	1997		70.4216		Observed	e0	LC	CZE	Observed
all-cause (direct)	Czech Republic	Men	1998		71.0483		Observed	e0	LC	CZE	Observed
all-cause (direct)	Czech Republic	Men	1999		71.3329		Observed	e0	LC	CZE	Observed
all-cause (direct)	Czech Republic	Men	2000		71.5518		Observed	e0	LC	CZE	Observed
all-cause (direct)	Czech Republic	Men	2001		72.0241		Observed	e0	LC	CZE	Observed
all-cause (direct)	Czech Republic	Men	2002		72.1023		Observed	e0	LC	CZE	Observed
all-cause (direct)	Czech Republic	Men	2003		72.0846		Observed	e0	LC	CZE	Observed
all-cause (direct)	Czech Republic	Men	2004		72.6117		Observed	e0	LC	CZE	Observed
all-cause (direct)	Czech Republic	Men	2005		72.9513		Observed	e0	LC	CZE	Observed
all-cause (direct)	Czech Republic	Men	2006		73.4759		Observed	e0	LC	CZE	Observed
all-cause (direct)	Czech Republic	Men	2007		73.6986		Observed	e0	LC	CZE	Observed
all-cause (direct)	Czech Republic	Men	2008		73.9675		Observed	e0	LC	CZE	Observed
all-cause (direct)	Czech Republic	Men	2009		74.1596		Observed	e0	LC	CZE	Observed
all-cause (direct)	Czech Republic	Men	2010		74.4332		Observed	e0	LC	CZE	Observed
all-cause (direct)	Czech Republic	Men	2011		74.7197		Observed	e0	LC	CZE	Observed
all-cause (direct)	Czech Republic	Men	2012		74.9654		Observed	e0	LC	CZE	Observed
all-cause (direct)	Czech Republic	Men	2013		75.1477		Observed	e0	LC	CZE	Observed
all-cause (direct)	Czech Republic	Men	2014		75.7177		Observed	e0	LC	CZE	Observed
all-cause (direct)	Czech Republic	Men	2015	75.7673	76.27	76.7651	Projected	e0	LC	CZE	Lee-Carter projection
all-cause (direct)	Czech Republic	Men	2016	75.9524	76.5631	77.1674	Projected	e0	LC	CZE	Lee-Carter projection
all-cause (direct)	Czech Republic	Men	2017	76.1557	76.855	77.548	Projected	e0	LC	CZE	Lee-Carter projection
all-cause (direct)	Czech Republic	Men	2018	76.3685	77.1437	77.9078	Projected	e0	LC	CZE	Lee-Carter projection
all-cause (direct)	Czech Republic	Men	2019	76.59	77.43	78.2585	Projected	e0	LC	CZE	Lee-Carter projection
all-cause (direct)	Czech Republic	Men	2020	76.8144	77.7168	78.6005	Projected	e0	LC	CZE	Lee-Carter projection
all-cause (direct)	Czech Republic	Men	2021	77.043	77.9974	78.9323	Projected	e0	LC	CZE	Lee-Carter projection
all-cause (direct)	Czech Republic	Men	2022	77.2733	78.2748	79.2523	Projected	e0	LC	CZE	Lee-Carter projection
all-cause (direct)	Czech Republic	Men	2023	77.5086	78.5509	79.5643	Projected	e0	LC	CZE	Lee-Carter projection
all-cause (direct)	Czech Republic	Men	2024	77.7364	78.8254	79.874	Projected	e0	LC	CZE	Lee-Carter projection
all-cause (direct)	Czech Republic	Men	2025	77.9674	79.0925	80.1761	Projected	e0	LC	CZE	Lee-Carter projection
all-cause (direct)	Czech Republic	Men	2026	78.1974	79.363	80.4682	Projected	e0	LC	CZE	Lee-Carter projection
all-cause (direct)	Czech Republic	Men	2027	78.4235	79.6281	80.7634	Projected	e0	LC	CZE	Lee-Carter projection
all-cause (direct)	Czech Republic	Men	2028	78.6579	79.887	81.0527	Projected	e0	LC	CZE	Lee-Carter projection
all-cause (direct)	Czech Republic	Men	2029	78.8865	80.1458	81.339	Projected	e0	LC	CZE	Lee-Carter projection
all-cause (direct)	Czech Republic	Men	2030	79.1093	80.4031	81.6221	Projected	e0	LC	CZE	Lee-Carter projection
all-cause (direct)	Czech Republic	Men	2031	79.3397	80.6544	81.8884	Projected	e0	LC	CZE	Lee-Carter projection
all-cause (direct)	Czech Republic	Men	2032	79.5715	80.9051	82.1593	Projected	e0	LC	CZE	Lee-Carter projection
all-cause (direct)	Czech Republic	Men	2033	79.7975	81.1567	82.4353	Projected	e0	LC	CZE	Lee-Carter projection
all-cause (direct)	Czech Republic	Men	2034	80.019	81.4009	82.6988	Projected	e0	LC	CZE	Lee-Carter projection
all-cause (direct)	Czech Republic	Men	2035	80.2425	81.6407	82.9464	Projected	e0	LC	CZE	Lee-Carter projection
all-cause (direct)	Czech Republic	Men	2036	80.4658	81.8823	83.2083	Projected	e0	LC	CZE	Lee-Carter projection
all-cause (direct)	Czech Republic	Men	2037	80.6904	82.1202	83.4535	Projected	e0	LC	CZE	Lee-Carter projection
all-cause (direct)	Czech Republic	Men	2038	80.9112	82.3565	83.7028	Projected	e0	LC	CZE	Lee-Carter projection
all-cause (direct)	Czech Republic	Men	2039	81.1321	82.5904	83.9502	Projected	e0	LC	CZE	Lee-Carter projection
all-cause (direct)	Czech Republic	Men	2040	81.3607	82.8194	84.1832	Projected	e0	LC	CZE	Lee-Carter projection
all-cause (direct)	Czech Republic	Men	2041	81.5651	83.0465	84.4301	Projected	e0	LC	CZE	Lee-Carter projection
all-cause (direct)	Czech Republic	Men	2042	81.7838	83.273	84.651	Projected	e0	LC	CZE	Lee-Carter projection
all-cause (direct)	Czech Republic	Men	2043	81.9954	83.4915	84.8795	Projected	e0	LC	CZE	Lee-Carter projection
all-cause (direct)	Czech Republic	Men	2044	82.2071	83.7134	85.1114	Projected	e0	LC	CZE	Lee-Carter projection
all-cause (direct)	Czech Republic	Men	2045	82.4157	83.9325	85.3308	Projected	e0	LC	CZE	Lee-Carter projection
all-cause (direct)	Czech Republic	Men	2046	82.6197	84.1493	85.5573	Projected	e0	LC	CZE	Lee-Carter projection
all-cause (direct)	Czech Republic	Men	2047	82.8286	84.3583	85.7667	Projected	e0	LC	CZE	Lee-Carter projection
all-cause (direct)	Czech Republic	Men	2048	83.0377	84.5706	85.9825	Projected	e0	LC	CZE	Lee-Carter projection
all-cause (direct)	Czech Republic	Men	2049	83.2393	84.7775	86.1834	Projected	e0	LC	CZE	Lee-Carter projection
all-cause (direct)	Czech Republic	Men	2050	83.4445	84.9831	86.3895	Projected	e0	LC	CZE	Lee-Carter projection
all-cause (direct)	Czech Republic	Men	2051	83.6435	85.1866	86.5987	Projected	e0	LC	CZE	Lee-Carter projection
all-cause (direct)	Czech Republic	Men	2052	83.8447	85.3831	86.8031	Projected	e0	LC	CZE	Lee-Carter projection
all-cause (direct)	Czech Republic	Men	2053	84.0278	85.5787	86.9996	Projected	e0	LC	CZE	Lee-Carter projection
all-cause (direct)	Czech Republic	Men	2054	84.2215	85.7738	87.1964	Projected	e0	LC	CZE	Lee-Carter projection
all-cause (direct)	Czech Republic	Men	2055	84.4108	85.9673	87.386	Projected	e0	LC	CZE	Lee-Carter projection
all-cause (direct)	Czech Republic	Men	2056	84.6044	86.1576	87.5738	Projected	e0	LC	CZE	Lee-Carter projection
all-cause (direct)	Czech Republic	Men	2057	84.7949	86.3454	87.7621	Projected	e0	LC	CZE	Lee-Carter projection
all-cause (direct)	Czech Republic	Men	2058	84.988	86.531	87.9498	Projected	e0	LC	CZE	Lee-Carter projection
all-cause (direct)	Czech Republic	Men	2059	85.1781	86.7182	88.128	Projected	e0	LC	CZE	Lee-Carter projection
all-cause (direct)	Czech Republic	Men	2060	85.365	86.8994	88.3048	Projected	e0	LC	CZE	Lee-Carter projection
all-cause (direct)	Czech Republic	Men	2061	85.5347	87.0798	88.4765	Projected	e0	LC	CZE	Lee-Carter projection
all-cause (direct)	Czech Republic	Men	2062	85.7216	87.254	88.6531	Projected	e0	LC	CZE	Lee-Carter projection
all-cause (direct)	Czech Republic	Men	2063	85.8936	87.4294	88.8277	Projected	e0	LC	CZE	Lee-Carter projection
all-cause (direct)	Czech Republic	Men	2064	86.0656	87.6035	88.9911	Projected	e0	LC	CZE	Lee-Carter projection
all-cause (direct)	Czech Republic	Men	2065	86.2365	87.7739	89.1588	Projected	e0	LC	CZE	Lee-Carter projection
all-cause (indirect)	Czech Republic	Men	2015	75.6007	76.4718	77.2986	Projected	e0	LL	CZE	Our projection
all-cause (indirect)	Czech Republic	Men	2016	75.7277	76.7808	77.7841	Projected	e0	LL	CZE	Our projection
all-cause (indirect)	Czech Republic	Men	2017	76.1872	77.4107	78.5404	Projected	e0	LL	CZE	Our projection
all-cause (indirect)	Czech Republic	Men	2018	76.5001	77.8252	79.0496	Projected	e0	LL	CZE	Our projection
all-cause (indirect)	Czech Republic	Men	2019	76.8311	78.2274	79.5244	Projected	e0	LL	CZE	Our projection
all-cause (indirect)	Czech Republic	Men	2020	77.1184	78.6173	79.9808	Projected	e0	LL	CZE	Our projection
all-cause (indirect)	Czech Republic	Men	2021	77.4198	78.9901	80.4006	Projected	e0	LL	CZE	Our projection
all-cause (indirect)	Czech Republic	Men	2022	77.7405	79.3516	80.8122	Projected	e0	LL	CZE	Our projection
all-cause (indirect)	Czech Republic	Men	2023	78.0274	79.697	81.2002	Projected	e0	LL	CZE	Our projection
all-cause (indirect)	Czech Republic	Men	2024	78.3053	80.0254	81.5671	Projected	e0	LL	CZE	Our projection
all-cause (indirect)	Czech Republic	Men	2025	78.5739	80.3435	81.9212	Projected	e0	LL	CZE	Our projection
all-cause (indirect)	Czech Republic	Men	2026	78.849	80.6588	82.2557	Projected	e0	LL	CZE	Our projection
all-cause (indirect)	Czech Republic	Men	2027	79.0956	80.9542	82.585	Projected	e0	LL	CZE	Our projection
all-cause (indirect)	Czech Republic	Men	2028	79.3464	81.241	82.894	Projected	e0	LL	CZE	Our projection
all-cause (indirect)	Czech Republic	Men	2029	79.5948	81.5299	83.2013	Projected	e0	LL	CZE	Our projection
all-cause (indirect)	Czech Republic	Men	2030	79.8388	81.7999	83.4808	Projected	e0	LL	CZE	Our projection
all-cause (indirect)	Czech Republic	Men	2031	80.0863	82.0649	83.7678	Projected	e0	LL	CZE	Our projection
all-cause (indirect)	Czech Republic	Men	2032	80.3306	82.3292	84.0373	Projected	e0	LL	CZE	Our projection
all-cause (indirect)	Czech Republic	Men	2033	80.5509	82.5797	84.2986	Projected	e0	LL	CZE	Our projection
all-cause (indirect)	Czech Republic	Men	2034	80.7653	82.8289	84.5594	Projected	e0	LL	CZE	Our projection
all-cause (indirect)	Czech Republic	Men	2035	80.981	83.0686	84.8212	Projected	e0	LL	CZE	Our projection
all-cause (indirect)	Czech Republic	Men	2036	81.2229	83.3041	85.0707	Projected	e0	LL	CZE	Our projection
all-cause (indirect)	Czech Republic	Men	2037	81.4353	83.5381	85.3142	Projected	e0	LL	CZE	Our projection
all-cause (indirect)	Czech Republic	Men	2038	81.6405	83.7723	85.5439	Projected	e0	LL	CZE	Our projection
all-cause (indirect)	Czech Republic	Men	2039	81.8499	83.9952	85.7606	Projected	e0	LL	CZE	Our projection
all-cause (indirect)	Czech Republic	Men	2040	82.0739	84.212	85.9868	Projected	e0	LL	CZE	Our projection
all-cause (indirect)	Czech Republic	Men	2041	82.2752	84.4293	86.2017	Projected	e0	LL	CZE	Our projection
all-cause (indirect)	Czech Republic	Men	2042	82.4881	84.6435	86.4304	Projected	e0	LL	CZE	Our projection
all-cause (indirect)	Czech Republic	Men	2043	82.686	84.8534	86.6448	Projected	e0	LL	CZE	Our projection
all-cause (indirect)	Czech Republic	Men	2044	82.8963	85.0637	86.8407	Projected	e0	LL	CZE	Our projection
all-cause (indirect)	Czech Republic	Men	2045	83.06	85.2627	87.0461	Projected	e0	LL	CZE	Our projection
all-cause (indirect)	Czech Republic	Men	2046	83.2856	85.4613	87.2461	Projected	e0	LL	CZE	Our projection
all-cause (indirect)	Czech Republic	Men	2047	83.4753	85.6569	87.4455	Projected	e0	LL	CZE	Our projection
all-cause (indirect)	Czech Republic	Men	2048	83.6726	85.8493	87.6291	Projected	e0	LL	CZE	Our projection
all-cause (indirect)	Czech Republic	Men	2049	83.8534	86.0403	87.8261	Projected	e0	LL	CZE	Our projection
all-cause (indirect)	Czech Republic	Men	2050	84.0434	86.2322	88.0109	Projected	e0	LL	CZE	Our projection
all-cause (indirect)	Czech Republic	Men	2051	84.2359	86.4223	88.1966	Projected	e0	LL	CZE	Our projection
all-cause (indirect)	Czech Republic	Men	2052	84.4122	86.6052	88.3869	Projected	e0	LL	CZE	Our projection
all-cause (indirect)	Czech Republic	Men	2053	84.6008	86.7958	88.5586	Projected	e0	LL	CZE	Our projection
all-cause (indirect)	Czech Republic	Men	2054	84.7814	86.9743	88.7474	Projected	e0	LL	CZE	Our projection
all-cause (indirect)	Czech Republic	Men	2055	84.9541	87.1548	88.9197	Projected	e0	LL	CZE	Our projection
all-cause (indirect)	Czech Republic	Men	2056	85.1408	87.3311	89.09	Projected	e0	LL	CZE	Our projection
all-cause (indirect)	Czech Republic	Men	2057	85.3149	87.5052	89.2596	Projected	e0	LL	CZE	Our projection
all-cause (indirect)	Czech Republic	Men	2058	85.4969	87.6833	89.4223	Projected	e0	LL	CZE	Our projection
all-cause (indirect)	Czech Republic	Men	2059	85.6641	87.8489	89.6025	Projected	e0	LL	CZE	Our projection
all-cause (indirect)	Czech Republic	Men	2060	85.8437	88.0257	89.7603	Projected	e0	LL	CZE	Our projection
all-cause (indirect)	Czech Republic	Men	2061	86.0106	88.1931	89.9292	Projected	e0	LL	CZE	Our projection
all-cause (indirect)	Czech Republic	Men	2062	86.1929	88.363	90.0821	Projected	e0	LL	CZE	Our projection
all-cause (indirect)	Czech Republic	Men	2063	86.3673	88.5289	90.2337	Projected	e0	LL	CZE	Our projection
all-cause (indirect)	Czech Republic	Men	2064	86.5447	88.6938	90.3956	Projected	e0	LL	CZE	Our projection
all-cause (indirect)	Czech Republic	Men	2065	86.7083	88.8574	90.5512	Projected	e0	LL	CZE	Our projection
all-cause (direct)	Denmark	Men	1990		72.0205		Observed	e0	LC	DNK	Observed
all-cause (direct)	Denmark	Men	1991		72.472		Observed	e0	LC	DNK	Observed
all-cause (direct)	Denmark	Men	1992		72.5603		Observed	e0	LC	DNK	Observed
all-cause (direct)	Denmark	Men	1993		72.593		Observed	e0	LC	DNK	Observed
all-cause (direct)	Denmark	Men	1994		72.7735		Observed	e0	LC	DNK	Observed
all-cause (direct)	Denmark	Men	1995		72.7262		Observed	e0	LC	DNK	Observed
all-cause (direct)	Denmark	Men	1996		73.051		Observed	e0	LC	DNK	Observed
all-cause (direct)	Denmark	Men	1997		73.5578		Observed	e0	LC	DNK	Observed
all-cause (direct)	Denmark	Men	1998		73.9403		Observed	e0	LC	DNK	Observed
all-cause (direct)	Denmark	Men	1999		74.2002		Observed	e0	LC	DNK	Observed
all-cause (direct)	Denmark	Men	2000		74.4346		Observed	e0	LC	DNK	Observed
all-cause (direct)	Denmark	Men	2001		74.6681		Observed	e0	LC	DNK	Observed
all-cause (direct)	Denmark	Men	2002		74.8		Observed	e0	LC	DNK	Observed
all-cause (direct)	Denmark	Men	2003		75.2804		Observed	e0	LC	DNK	Observed
all-cause (direct)	Denmark	Men	2004		75.1489		Observed	e0	LC	DNK	Observed
all-cause (direct)	Denmark	Men	2005		75.9334		Observed	e0	LC	DNK	Observed
all-cause (direct)	Denmark	Men	2006		75.8926		Observed	e0	LC	DNK	Observed
all-cause (direct)	Denmark	Men	2007		76.1261		Observed	e0	LC	DNK	Observed
all-cause (direct)	Denmark	Men	2008		76.4814		Observed	e0	LC	DNK	Observed
all-cause (direct)	Denmark	Men	2009		76.8442		Observed	e0	LC	DNK	Observed
all-cause (direct)	Denmark	Men	2010		77.1133		Observed	e0	LC	DNK	Observed
all-cause (direct)	Denmark	Men	2011		77.7073		Observed	e0	LC	DNK	Observed
all-cause (direct)	Denmark	Men	2012		78.0567		Observed	e0	LC	DNK	Observed
all-cause (direct)	Denmark	Men	2013		78.2629		Observed	e0	LC	DNK	Observed
all-cause (direct)	Denmark	Men	2014		78.5638		Observed	e0	LC	DNK	Observed
all-cause (direct)	Denmark	Men	2015	78.4871	79.0572	79.618	Projected	e0	LC	DNK	Lee-Carter projection
all-cause (direct)	Denmark	Men	2016	78.5849	79.2854	79.9514	Projected	e0	LC	DNK	Lee-Carter projection
all-cause (direct)	Denmark	Men	2017	78.7146	79.5111	80.2701	Projected	e0	LC	DNK	Lee-Carter projection
all-cause (direct)	Denmark	Men	2018	78.851	79.7312	80.5744	Projected	e0	LC	DNK	Lee-Carter projection
all-cause (direct)	Denmark	Men	2019	79.0036	79.9481	80.8576	Projected	e0	LC	DNK	Lee-Carter projection
all-cause (direct)	Denmark	Men	2020	79.1469	80.1674	81.1383	Projected	e0	LC	DNK	Lee-Carter projection
all-cause (direct)	Denmark	Men	2021	79.3076	80.3831	81.4126	Projected	e0	LC	DNK	Lee-Carter projection
all-cause (direct)	Denmark	Men	2022	79.4638	80.5953	81.6709	Projected	e0	LC	DNK	Lee-Carter projection
all-cause (direct)	Denmark	Men	2023	79.6251	80.8057	81.9195	Projected	e0	LC	DNK	Lee-Carter projection
all-cause (direct)	Denmark	Men	2024	79.7921	81.0172	82.1612	Projected	e0	LC	DNK	Lee-Carter projection
all-cause (direct)	Denmark	Men	2025	79.948	81.2217	82.4045	Projected	e0	LC	DNK	Lee-Carter projection
all-cause (direct)	Denmark	Men	2026	80.1039	81.424	82.6363	Projected	e0	LC	DNK	Lee-Carter projection
all-cause (direct)	Denmark	Men	2027	80.2754	81.6256	82.8604	Projected	e0	LC	DNK	Lee-Carter projection
all-cause (direct)	Denmark	Men	2028	80.4384	81.8272	83.0911	Projected	e0	LC	DNK	Lee-Carter projection
all-cause (direct)	Denmark	Men	2029	80.6018	82.027	83.313	Projected	e0	LC	DNK	Lee-Carter projection
all-cause (direct)	Denmark	Men	2030	80.7694	82.2194	83.5335	Projected	e0	LC	DNK	Lee-Carter projection
all-cause (direct)	Denmark	Men	2031	80.9316	82.4076	83.7426	Projected	e0	LC	DNK	Lee-Carter projection
all-cause (direct)	Denmark	Men	2032	81.1046	82.5967	83.9554	Projected	e0	LC	DNK	Lee-Carter projection
all-cause (direct)	Denmark	Men	2033	81.258	82.7815	84.1624	Projected	e0	LC	DNK	Lee-Carter projection
all-cause (direct)	Denmark	Men	2034	81.4242	82.9674	84.359	Projected	e0	LC	DNK	Lee-Carter projection
all-cause (direct)	Denmark	Men	2035	81.589	83.1504	84.5609	Projected	e0	LC	DNK	Lee-Carter projection
all-cause (direct)	Denmark	Men	2036	81.7542	83.3327	84.7494	Projected	e0	LC	DNK	Lee-Carter projection
all-cause (direct)	Denmark	Men	2037	81.9105	83.5103	84.9395	Projected	e0	LC	DNK	Lee-Carter projection
all-cause (direct)	Denmark	Men	2038	82.0726	83.6885	85.1293	Projected	e0	LC	DNK	Lee-Carter projection
all-cause (direct)	Denmark	Men	2039	82.2364	83.8646	85.3143	Projected	e0	LC	DNK	Lee-Carter projection
all-cause (direct)	Denmark	Men	2040	82.3961	84.0361	85.4928	Projected	e0	LC	DNK	Lee-Carter projection
all-cause (direct)	Denmark	Men	2041	82.5519	84.2102	85.674	Projected	e0	LC	DNK	Lee-Carter projection
all-cause (direct)	Denmark	Men	2042	82.7033	84.3793	85.8402	Projected	e0	LC	DNK	Lee-Carter projection
all-cause (direct)	Denmark	Men	2043	82.8641	84.5448	86.0077	Projected	e0	LC	DNK	Lee-Carter projection
all-cause (direct)	Denmark	Men	2044	83.0135	84.7078	86.1768	Projected	e0	LC	DNK	Lee-Carter projection
all-cause (direct)	Denmark	Men	2045	83.1672	84.8694	86.351	Projected	e0	LC	DNK	Lee-Carter projection
all-cause (direct)	Denmark	Men	2046	83.3234	85.0316	86.5114	Projected	e0	LC	DNK	Lee-Carter projection
all-cause (direct)	Denmark	Men	2047	83.4814	85.1884	86.6736	Projected	e0	LC	DNK	Lee-Carter projection
all-cause (direct)	Denmark	Men	2048	83.6339	85.3424	86.8245	Projected	e0	LC	DNK	Lee-Carter projection
all-cause (direct)	Denmark	Men	2049	83.7888	85.4963	86.9851	Projected	e0	LC	DNK	Lee-Carter projection
all-cause (direct)	Denmark	Men	2050	83.9333	85.6507	87.1405	Projected	e0	LC	DNK	Lee-Carter projection
all-cause (direct)	Denmark	Men	2051	84.0816	85.8008	87.289	Projected	e0	LC	DNK	Lee-Carter projection
all-cause (direct)	Denmark	Men	2052	84.2325	85.9495	87.4365	Projected	e0	LC	DNK	Lee-Carter projection
all-cause (direct)	Denmark	Men	2053	84.3733	86.0969	87.5876	Projected	e0	LC	DNK	Lee-Carter projection
all-cause (direct)	Denmark	Men	2054	84.5212	86.2409	87.7272	Projected	e0	LC	DNK	Lee-Carter projection
all-cause (direct)	Denmark	Men	2055	84.6523	86.3862	87.8723	Projected	e0	LC	DNK	Lee-Carter projection
all-cause (direct)	Denmark	Men	2056	84.7852	86.5254	88.0159	Projected	e0	LC	DNK	Lee-Carter projection
all-cause (direct)	Denmark	Men	2057	84.9269	86.6632	88.148	Projected	e0	LC	DNK	Lee-Carter projection
all-cause (direct)	Denmark	Men	2058	85.0706	86.8035	88.2871	Projected	e0	LC	DNK	Lee-Carter projection
all-cause (direct)	Denmark	Men	2059	85.2051	86.9407	88.4185	Projected	e0	LC	DNK	Lee-Carter projection
all-cause (direct)	Denmark	Men	2060	85.3419	87.078	88.548	Projected	e0	LC	DNK	Lee-Carter projection
all-cause (direct)	Denmark	Men	2061	85.4765	87.2075	88.6832	Projected	e0	LC	DNK	Lee-Carter projection
all-cause (direct)	Denmark	Men	2062	85.6113	87.338	88.8111	Projected	e0	LC	DNK	Lee-Carter projection
all-cause (direct)	Denmark	Men	2063	85.7446	87.4697	88.9343	Projected	e0	LC	DNK	Lee-Carter projection
all-cause (direct)	Denmark	Men	2064	85.8806	87.5963	89.0552	Projected	e0	LC	DNK	Lee-Carter projection
all-cause (direct)	Denmark	Men	2065	86.0081	87.7237	89.1848	Projected	e0	LC	DNK	Lee-Carter projection
all-cause (indirect)	Denmark	Men	2015	78.4176	79.561	80.6798	Projected	e0	LL	DNK	Our projection
all-cause (indirect)	Denmark	Men	2016	78.5328	80.0052	81.4263	Projected	e0	LL	DNK	Our projection
all-cause (indirect)	Denmark	Men	2017	78.5845	80.3164	81.94	Projected	e0	LL	DNK	Our projection
all-cause (indirect)	Denmark	Men	2018	78.6695	80.5905	82.3895	Projected	e0	LL	DNK	Our projection
all-cause (indirect)	Denmark	Men	2019	78.7579	80.8712	82.8249	Projected	e0	LL	DNK	Our projection
all-cause (indirect)	Denmark	Men	2020	78.8873	81.1616	83.2437	Projected	e0	LL	DNK	Our projection
all-cause (indirect)	Denmark	Men	2021	79.0386	81.4443	83.6252	Projected	e0	LL	DNK	Our projection
all-cause (indirect)	Denmark	Men	2022	79.175	81.7183	83.9955	Projected	e0	LL	DNK	Our projection
all-cause (indirect)	Denmark	Men	2023	79.3364	81.993	84.378	Projected	e0	LL	DNK	Our projection
all-cause (indirect)	Denmark	Men	2024	79.5058	82.2617	84.7284	Projected	e0	LL	DNK	Our projection
all-cause (indirect)	Denmark	Men	2025	79.6889	82.5384	85.0735	Projected	e0	LL	DNK	Our projection
all-cause (indirect)	Denmark	Men	2026	79.8622	82.8027	85.3858	Projected	e0	LL	DNK	Our projection
all-cause (indirect)	Denmark	Men	2027	80.0254	83.0589	85.7127	Projected	e0	LL	DNK	Our projection
all-cause (indirect)	Denmark	Men	2028	80.2192	83.3212	86.0159	Projected	e0	LL	DNK	Our projection
all-cause (indirect)	Denmark	Men	2029	80.3854	83.5712	86.3072	Projected	e0	LL	DNK	Our projection
all-cause (indirect)	Denmark	Men	2030	80.578	83.8196	86.6288	Projected	e0	LL	DNK	Our projection
all-cause (indirect)	Denmark	Men	2031	80.7393	84.055	86.8867	Projected	e0	LL	DNK	Our projection
all-cause (indirect)	Denmark	Men	2032	80.9136	84.2962	87.1575	Projected	e0	LL	DNK	Our projection
all-cause (indirect)	Denmark	Men	2033	81.1033	84.5302	87.4417	Projected	e0	LL	DNK	Our projection
all-cause (indirect)	Denmark	Men	2034	81.2582	84.7594	87.7092	Projected	e0	LL	DNK	Our projection
all-cause (indirect)	Denmark	Men	2035	81.453	84.9866	87.9668	Projected	e0	LL	DNK	Our projection
all-cause (indirect)	Denmark	Men	2036	81.6246	85.2109	88.2149	Projected	e0	LL	DNK	Our projection
all-cause (indirect)	Denmark	Men	2037	81.8235	85.4315	88.4659	Projected	e0	LL	DNK	Our projection
all-cause (indirect)	Denmark	Men	2038	81.9869	85.6404	88.6944	Projected	e0	LL	DNK	Our projection
all-cause (indirect)	Denmark	Men	2039	82.1328	85.855	88.9139	Projected	e0	LL	DNK	Our projection
all-cause (indirect)	Denmark	Men	2040	82.3167	86.0618	89.1392	Projected	e0	LL	DNK	Our projection
all-cause (indirect)	Denmark	Men	2041	82.4579	86.2671	89.3518	Projected	e0	LL	DNK	Our projection
all-cause (indirect)	Denmark	Men	2042	82.6684	86.4737	89.5805	Projected	e0	LL	DNK	Our projection
all-cause (indirect)	Denmark	Men	2043	82.8267	86.6719	89.8102	Projected	e0	LL	DNK	Our projection
all-cause (indirect)	Denmark	Men	2044	82.9963	86.8737	90.0291	Projected	e0	LL	DNK	Our projection
all-cause (indirect)	Denmark	Men	2045	83.1549	87.061	90.2255	Projected	e0	LL	DNK	Our projection
all-cause (indirect)	Denmark	Men	2046	83.3236	87.2527	90.4002	Projected	e0	LL	DNK	Our projection
all-cause (indirect)	Denmark	Men	2047	83.4707	87.4421	90.6133	Projected	e0	LL	DNK	Our projection
all-cause (indirect)	Denmark	Men	2048	83.6427	87.6273	90.7783	Projected	e0	LL	DNK	Our projection
all-cause (indirect)	Denmark	Men	2049	83.7983	87.8224	90.9847	Projected	e0	LL	DNK	Our projection
all-cause (indirect)	Denmark	Men	2050	83.9566	88.0026	91.1799	Projected	e0	LL	DNK	Our projection
all-cause (indirect)	Denmark	Men	2051	84.1224	88.1795	91.377	Projected	e0	LL	DNK	Our projection
all-cause (indirect)	Denmark	Men	2052	84.2865	88.359	91.5355	Projected	e0	LL	DNK	Our projection
all-cause (indirect)	Denmark	Men	2053	84.4678	88.5349	91.722	Projected	e0	LL	DNK	Our projection
all-cause (indirect)	Denmark	Men	2054	84.618	88.7108	91.8892	Projected	e0	LL	DNK	Our projection
all-cause (indirect)	Denmark	Men	2055	84.7611	88.8815	92.0457	Projected	e0	LL	DNK	Our projection
all-cause (indirect)	Denmark	Men	2056	84.9229	89.0516	92.2318	Projected	e0	LL	DNK	Our projection
all-cause (indirect)	Denmark	Men	2057	85.0763	89.2189	92.3946	Projected	e0	LL	DNK	Our projection
all-cause (indirect)	Denmark	Men	2058	85.2526	89.389	92.5579	Projected	e0	LL	DNK	Our projection
all-cause (indirect)	Denmark	Men	2059	85.4017	89.5565	92.7222	Projected	e0	LL	DNK	Our projection
all-cause (indirect)	Denmark	Men	2060	85.5337	89.7192	92.8683	Projected	e0	LL	DNK	Our projection
all-cause (indirect)	Denmark	Men	2061	85.7132	89.8889	93.0137	Projected	e0	LL	DNK	Our projection
all-cause (indirect)	Denmark	Men	2062	85.8373	90.0399	93.1731	Projected	e0	LL	DNK	Our projection
all-cause (indirect)	Denmark	Men	2063	86.0322	90.1951	93.3105	Projected	e0	LL	DNK	Our projection
all-cause (indirect)	Denmark	Men	2064	86.1603	90.349	93.4691	Projected	e0	LL	DNK	Our projection
all-cause (indirect)	Denmark	Men	2065	86.3141	90.5012	93.6154	Projected	e0	LL	DNK	Our projection
all-cause (direct)	Finland	Men	1990		70.9407		Observed	e0	LC	FIN	Observed
all-cause (direct)	Finland	Men	1991		71.3346		Observed	e0	LC	FIN	Observed
all-cause (direct)	Finland	Men	1992		71.672		Observed	e0	LC	FIN	Observed
all-cause (direct)	Finland	Men	1993		72.1092		Observed	e0	LC	FIN	Observed
all-cause (direct)	Finland	Men	1994		72.7911		Observed	e0	LC	FIN	Observed
all-cause (direct)	Finland	Men	1995		72.8091		Observed	e0	LC	FIN	Observed
all-cause (direct)	Finland	Men	1996		73.0303		Observed	e0	LC	FIN	Observed
all-cause (direct)	Finland	Men	1997		73.4318		Observed	e0	LC	FIN	Observed
all-cause (direct)	Finland	Men	1998		73.5117		Observed	e0	LC	FIN	Observed
all-cause (direct)	Finland	Men	1999		73.7381		Observed	e0	LC	FIN	Observed
all-cause (direct)	Finland	Men	2000		74.15		Observed	e0	LC	FIN	Observed
all-cause (direct)	Finland	Men	2001		74.5755		Observed	e0	LC	FIN	Observed
all-cause (direct)	Finland	Men	2002		74.8612		Observed	e0	LC	FIN	Observed
all-cause (direct)	Finland	Men	2003		75.1247		Observed	e0	LC	FIN	Observed
all-cause (direct)	Finland	Men	2004		75.3013		Observed	e0	LC	FIN	Observed
all-cause (direct)	Finland	Men	2005		75.5281		Observed	e0	LC	FIN	Observed
all-cause (direct)	Finland	Men	2006		75.8171		Observed	e0	LC	FIN	Observed
all-cause (direct)	Finland	Men	2007		75.853		Observed	e0	LC	FIN	Observed
all-cause (direct)	Finland	Men	2008		76.333		Observed	e0	LC	FIN	Observed
all-cause (direct)	Finland	Men	2009		76.4761		Observed	e0	LC	FIN	Observed
all-cause (direct)	Finland	Men	2010		76.7191		Observed	e0	LC	FIN	Observed
all-cause (direct)	Finland	Men	2011		77.1877		Observed	e0	LC	FIN	Observed
all-cause (direct)	Finland	Men	2012		77.5012		Observed	e0	LC	FIN	Observed
all-cause (direct)	Finland	Men	2013		77.8735		Observed	e0	LC	FIN	Observed
all-cause (direct)	Finland	Men	2014		78.1287		Observed	e0	LC	FIN	Observed
all-cause (direct)	Finland	Men	2015	77.9733	78.4329	78.8849	Projected	e0	LC	FIN	Lee-Carter projection
all-cause (direct)	Finland	Men	2016	78.1205	78.6863	79.2375	Projected	e0	LC	FIN	Lee-Carter projection
all-cause (direct)	Finland	Men	2017	78.2982	78.9387	79.5683	Projected	e0	LC	FIN	Lee-Carter projection
all-cause (direct)	Finland	Men	2018	78.4731	79.1867	79.8801	Projected	e0	LC	FIN	Lee-Carter projection
all-cause (direct)	Finland	Men	2019	78.664	79.4336	80.1838	Projected	e0	LC	FIN	Lee-Carter projection
all-cause (direct)	Finland	Men	2020	78.8459	79.6742	80.4712	Projected	e0	LC	FIN	Lee-Carter projection
all-cause (direct)	Finland	Men	2021	79.0376	79.915	80.7602	Projected	e0	LC	FIN	Lee-Carter projection
all-cause (direct)	Finland	Men	2022	79.2269	80.1575	81.0396	Projected	e0	LC	FIN	Lee-Carter projection
all-cause (direct)	Finland	Men	2023	79.4334	80.3946	81.3156	Projected	e0	LC	FIN	Lee-Carter projection
all-cause (direct)	Finland	Men	2024	79.6216	80.6281	81.5819	Projected	e0	LC	FIN	Lee-Carter projection
all-cause (direct)	Finland	Men	2025	79.8249	80.8587	81.8471	Projected	e0	LC	FIN	Lee-Carter projection
all-cause (direct)	Finland	Men	2026	80.015	81.089	82.1065	Projected	e0	LC	FIN	Lee-Carter projection
all-cause (direct)	Finland	Men	2027	80.2101	81.3138	82.3593	Projected	e0	LC	FIN	Lee-Carter projection
all-cause (direct)	Finland	Men	2028	80.4115	81.5392	82.6072	Projected	e0	LC	FIN	Lee-Carter projection
all-cause (direct)	Finland	Men	2029	80.6025	81.7626	82.8531	Projected	e0	LC	FIN	Lee-Carter projection
all-cause (direct)	Finland	Men	2030	80.7998	81.9823	83.0891	Projected	e0	LC	FIN	Lee-Carter projection
all-cause (direct)	Finland	Men	2031	80.9973	82.1993	83.3272	Projected	e0	LC	FIN	Lee-Carter projection
all-cause (direct)	Finland	Men	2032	81.1888	82.4162	83.5587	Projected	e0	LC	FIN	Lee-Carter projection
all-cause (direct)	Finland	Men	2033	81.3911	82.628	83.7854	Projected	e0	LC	FIN	Lee-Carter projection
all-cause (direct)	Finland	Men	2034	81.5867	82.8383	84.016	Projected	e0	LC	FIN	Lee-Carter projection
all-cause (direct)	Finland	Men	2035	81.7806	83.0474	84.2351	Projected	e0	LC	FIN	Lee-Carter projection
all-cause (direct)	Finland	Men	2036	81.9639	83.2544	84.4478	Projected	e0	LC	FIN	Lee-Carter projection
all-cause (direct)	Finland	Men	2037	82.1507	83.4537	84.6727	Projected	e0	LC	FIN	Lee-Carter projection
all-cause (direct)	Finland	Men	2038	82.3406	83.6563	84.8826	Projected	e0	LC	FIN	Lee-Carter projection
all-cause (direct)	Finland	Men	2039	82.5304	83.8532	85.0807	Projected	e0	LC	FIN	Lee-Carter projection
all-cause (direct)	Finland	Men	2040	82.7107	84.0517	85.2963	Projected	e0	LC	FIN	Lee-Carter projection
all-cause (direct)	Finland	Men	2041	82.8969	84.2444	85.4912	Projected	e0	LC	FIN	Lee-Carter projection
all-cause (direct)	Finland	Men	2042	83.0888	84.4397	85.6879	Projected	e0	LC	FIN	Lee-Carter projection
all-cause (direct)	Finland	Men	2043	83.2663	84.6286	85.8893	Projected	e0	LC	FIN	Lee-Carter projection
all-cause (direct)	Finland	Men	2044	83.4511	84.8136	86.076	Projected	e0	LC	FIN	Lee-Carter projection
all-cause (direct)	Finland	Men	2045	83.629	85.0004	86.2651	Projected	e0	LC	FIN	Lee-Carter projection
all-cause (direct)	Finland	Men	2046	83.8012	85.1825	86.4466	Projected	e0	LC	FIN	Lee-Carter projection
all-cause (direct)	Finland	Men	2047	83.9802	85.3639	86.6275	Projected	e0	LC	FIN	Lee-Carter projection
all-cause (direct)	Finland	Men	2048	84.151	85.5421	86.8131	Projected	e0	LC	FIN	Lee-Carter projection
all-cause (direct)	Finland	Men	2049	84.3207	85.7169	86.9911	Projected	e0	LC	FIN	Lee-Carter projection
all-cause (direct)	Finland	Men	2050	84.5001	85.8933	87.1663	Projected	e0	LC	FIN	Lee-Carter projection
all-cause (direct)	Finland	Men	2051	84.6703	86.0641	87.3323	Projected	e0	LC	FIN	Lee-Carter projection
all-cause (direct)	Finland	Men	2052	84.8392	86.2326	87.5031	Projected	e0	LC	FIN	Lee-Carter projection
all-cause (direct)	Finland	Men	2053	85.0072	86.4015	87.6684	Projected	e0	LC	FIN	Lee-Carter projection
all-cause (direct)	Finland	Men	2054	85.1747	86.5662	87.8304	Projected	e0	LC	FIN	Lee-Carter projection
all-cause (direct)	Finland	Men	2055	85.3349	86.7297	87.9897	Projected	e0	LC	FIN	Lee-Carter projection
all-cause (direct)	Finland	Men	2056	85.5012	86.8878	88.1512	Projected	e0	LC	FIN	Lee-Carter projection
all-cause (direct)	Finland	Men	2057	85.6608	87.0484	88.31	Projected	e0	LC	FIN	Lee-Carter projection
all-cause (direct)	Finland	Men	2058	85.8168	87.2083	88.4609	Projected	e0	LC	FIN	Lee-Carter projection
all-cause (direct)	Finland	Men	2059	85.9569	87.3626	88.6073	Projected	e0	LC	FIN	Lee-Carter projection
all-cause (direct)	Finland	Men	2060	86.1129	87.5171	88.7596	Projected	e0	LC	FIN	Lee-Carter projection
all-cause (direct)	Finland	Men	2061	86.2679	87.6662	88.9091	Projected	e0	LC	FIN	Lee-Carter projection
all-cause (direct)	Finland	Men	2062	86.4191	87.8126	89.0569	Projected	e0	LC	FIN	Lee-Carter projection
all-cause (direct)	Finland	Men	2063	86.567	87.9591	89.1993	Projected	e0	LC	FIN	Lee-Carter projection
all-cause (direct)	Finland	Men	2064	86.7202	88.108	89.3367	Projected	e0	LC	FIN	Lee-Carter projection
all-cause (direct)	Finland	Men	2065	86.8631	88.2492	89.4736	Projected	e0	LC	FIN	Lee-Carter projection
all-cause (indirect)	Finland	Men	2015	77.8292	78.6598	79.4193	Projected	e0	LL	FIN	Our projection
all-cause (indirect)	Finland	Men	2016	77.9385	79.0067	79.965	Projected	e0	LL	FIN	Our projection
all-cause (indirect)	Finland	Men	2017	78.1882	79.3635	80.4047	Projected	e0	LL	FIN	Our projection
all-cause (indirect)	Finland	Men	2018	78.3721	79.673	80.7879	Projected	e0	LL	FIN	Our projection
all-cause (indirect)	Finland	Men	2019	78.5818	79.984	81.1859	Projected	e0	LL	FIN	Our projection
all-cause (indirect)	Finland	Men	2020	78.7865	80.2818	81.5428	Projected	e0	LL	FIN	Our projection
all-cause (indirect)	Finland	Men	2021	78.9942	80.5827	81.9031	Projected	e0	LL	FIN	Our projection
all-cause (indirect)	Finland	Men	2022	79.2155	80.8691	82.2446	Projected	e0	LL	FIN	Our projection
all-cause (indirect)	Finland	Men	2023	79.4371	81.1554	82.5756	Projected	e0	LL	FIN	Our projection
all-cause (indirect)	Finland	Men	2024	79.6342	81.4398	82.9126	Projected	e0	LL	FIN	Our projection
all-cause (indirect)	Finland	Men	2025	79.8586	81.7185	83.2287	Projected	e0	LL	FIN	Our projection
all-cause (indirect)	Finland	Men	2026	80.0989	81.997	83.5374	Projected	e0	LL	FIN	Our projection
all-cause (indirect)	Finland	Men	2027	80.3096	82.2719	83.8413	Projected	e0	LL	FIN	Our projection
all-cause (indirect)	Finland	Men	2028	80.5543	82.5409	84.137	Projected	e0	LL	FIN	Our projection
all-cause (indirect)	Finland	Men	2029	80.7688	82.8079	84.428	Projected	e0	LL	FIN	Our projection
all-cause (indirect)	Finland	Men	2030	81.019	83.066	84.7027	Projected	e0	LL	FIN	Our projection
all-cause (indirect)	Finland	Men	2031	81.2487	83.3316	85.0003	Projected	e0	LL	FIN	Our projection
all-cause (indirect)	Finland	Men	2032	81.4641	83.5871	85.2639	Projected	e0	LL	FIN	Our projection
all-cause (indirect)	Finland	Men	2033	81.7036	83.8435	85.5373	Projected	e0	LL	FIN	Our projection
all-cause (indirect)	Finland	Men	2034	81.9365	84.0904	85.7993	Projected	e0	LL	FIN	Our projection
all-cause (indirect)	Finland	Men	2035	82.1713	84.3321	86.0488	Projected	e0	LL	FIN	Our projection
all-cause (indirect)	Finland	Men	2036	82.4151	84.5764	86.3021	Projected	e0	LL	FIN	Our projection
all-cause (indirect)	Finland	Men	2037	82.6396	84.8132	86.557	Projected	e0	LL	FIN	Our projection
all-cause (indirect)	Finland	Men	2038	82.8684	85.0522	86.7967	Projected	e0	LL	FIN	Our projection
all-cause (indirect)	Finland	Men	2039	83.0977	85.2747	87.0217	Projected	e0	LL	FIN	Our projection
all-cause (indirect)	Finland	Men	2040	83.2892	85.507	87.2621	Projected	e0	LL	FIN	Our projection
all-cause (indirect)	Finland	Men	2041	83.4931	85.7238	87.4928	Projected	e0	LL	FIN	Our projection
all-cause (indirect)	Finland	Men	2042	83.7185	85.9524	87.7208	Projected	e0	LL	FIN	Our projection
all-cause (indirect)	Finland	Men	2043	83.9294	86.1626	87.9486	Projected	e0	LL	FIN	Our projection
all-cause (indirect)	Finland	Men	2044	84.1278	86.3796	88.1623	Projected	e0	LL	FIN	Our projection
all-cause (indirect)	Finland	Men	2045	84.3354	86.5831	88.3826	Projected	e0	LL	FIN	Our projection
all-cause (indirect)	Finland	Men	2046	84.548	86.7949	88.5854	Projected	e0	LL	FIN	Our projection
all-cause (indirect)	Finland	Men	2047	84.7373	86.998	88.7932	Projected	e0	LL	FIN	Our projection
all-cause (indirect)	Finland	Men	2048	84.9423	87.1973	88.9965	Projected	e0	LL	FIN	Our projection
all-cause (indirect)	Finland	Men	2049	85.128	87.3957	89.2006	Projected	e0	LL	FIN	Our projection
all-cause (indirect)	Finland	Men	2050	85.3248	87.5918	89.3984	Projected	e0	LL	FIN	Our projection
all-cause (indirect)	Finland	Men	2051	85.487	87.7834	89.6005	Projected	e0	LL	FIN	Our projection
all-cause (indirect)	Finland	Men	2052	85.6881	87.9771	89.7843	Projected	e0	LL	FIN	Our projection
all-cause (indirect)	Finland	Men	2053	85.8775	88.1631	89.9819	Projected	e0	LL	FIN	Our projection
all-cause (indirect)	Finland	Men	2054	86.0522	88.3535	90.1695	Projected	e0	LL	FIN	Our projection
all-cause (indirect)	Finland	Men	2055	86.2574	88.5362	90.3439	Projected	e0	LL	FIN	Our projection
all-cause (indirect)	Finland	Men	2056	86.4349	88.7122	90.5327	Projected	e0	LL	FIN	Our projection
all-cause (indirect)	Finland	Men	2057	86.6008	88.887	90.7094	Projected	e0	LL	FIN	Our projection
all-cause (indirect)	Finland	Men	2058	86.7817	89.0655	90.8814	Projected	e0	LL	FIN	Our projection
all-cause (indirect)	Finland	Men	2059	86.9715	89.2361	91.0508	Projected	e0	LL	FIN	Our projection
all-cause (indirect)	Finland	Men	2060	87.141	89.4037	91.2282	Projected	e0	LL	FIN	Our projection
all-cause (indirect)	Finland	Men	2061	87.3075	89.5731	91.3807	Projected	e0	LL	FIN	Our projection
all-cause (indirect)	Finland	Men	2062	87.4733	89.7424	91.5625	Projected	e0	LL	FIN	Our projection
all-cause (indirect)	Finland	Men	2063	87.6297	89.9045	91.7151	Projected	e0	LL	FIN	Our projection
all-cause (indirect)	Finland	Men	2064	87.786	90.0616	91.881	Projected	e0	LL	FIN	Our projection
all-cause (indirect)	Finland	Men	2065	87.9519	90.2211	92.0399	Projected	e0	LL	FIN	Our projection
all-cause (direct)	France	Men	1990		72.7201		Observed	e0	LC	FRATNP	Observed
all-cause (direct)	France	Men	1991		72.8756		Observed	e0	LC	FRATNP	Observed
all-cause (direct)	France	Men	1992		73.1459		Observed	e0	LC	FRATNP	Observed
all-cause (direct)	France	Men	1993		73.2453		Observed	e0	LC	FRATNP	Observed
all-cause (direct)	France	Men	1994		73.6439		Observed	e0	LC	FRATNP	Observed
all-cause (direct)	France	Men	1995		73.8333		Observed	e0	LC	FRATNP	Observed
all-cause (direct)	France	Men	1996		74.0627		Observed	e0	LC	FRATNP	Observed
all-cause (direct)	France	Men	1997		74.5056		Observed	e0	LC	FRATNP	Observed
all-cause (direct)	France	Men	1998		74.7222		Observed	e0	LC	FRATNP	Observed
all-cause (direct)	France	Men	1999		74.9391		Observed	e0	LC	FRATNP	Observed
all-cause (direct)	France	Men	2000		75.235		Observed	e0	LC	FRATNP	Observed
all-cause (direct)	France	Men	2001		75.4314		Observed	e0	LC	FRATNP	Observed
all-cause (direct)	France	Men	2002		75.7063		Observed	e0	LC	FRATNP	Observed
all-cause (direct)	France	Men	2003		75.809		Observed	e0	LC	FRATNP	Observed
all-cause (direct)	France	Men	2004		76.6758		Observed	e0	LC	FRATNP	Observed
all-cause (direct)	France	Men	2005		76.72		Observed	e0	LC	FRATNP	Observed
all-cause (direct)	France	Men	2006		77.1623		Observed	e0	LC	FRATNP	Observed
all-cause (direct)	France	Men	2007		77.3914		Observed	e0	LC	FRATNP	Observed
all-cause (direct)	France	Men	2008		77.5963		Observed	e0	LC	FRATNP	Observed
all-cause (direct)	France	Men	2009		77.7549		Observed	e0	LC	FRATNP	Observed
all-cause (direct)	France	Men	2010		78.019		Observed	e0	LC	FRATNP	Observed
all-cause (direct)	France	Men	2011		78.4308		Observed	e0	LC	FRATNP	Observed
all-cause (direct)	France	Men	2012		78.4939		Observed	e0	LC	FRATNP	Observed
all-cause (direct)	France	Men	2013		78.7713		Observed	e0	LC	FRATNP	Observed
all-cause (direct)	France	Men	2014		79.2806		Observed	e0	LC	FRATNP	Observed
all-cause (direct)	France	Men	2015	79.2758	79.8025	80.3152	Projected	e0	LC	FRATNP	Lee-Carter projection
all-cause (direct)	France	Men	2016	79.4089	80.0397	80.6575	Projected	e0	LC	FRATNP	Lee-Carter projection
all-cause (direct)	France	Men	2017	79.5459	80.2712	80.9827	Projected	e0	LC	FRATNP	Lee-Carter projection
all-cause (direct)	France	Men	2018	79.696	80.5028	81.2861	Projected	e0	LC	FRATNP	Lee-Carter projection
all-cause (direct)	France	Men	2019	79.8533	80.7314	81.5756	Projected	e0	LC	FRATNP	Lee-Carter projection
all-cause (direct)	France	Men	2020	80.0234	80.9569	81.857	Projected	e0	LC	FRATNP	Lee-Carter projection
all-cause (direct)	France	Men	2021	80.1898	81.1806	82.1302	Projected	e0	LC	FRATNP	Lee-Carter projection
all-cause (direct)	France	Men	2022	80.3614	81.4033	82.3991	Projected	e0	LC	FRATNP	Lee-Carter projection
all-cause (direct)	France	Men	2023	80.5293	81.621	82.6692	Projected	e0	LC	FRATNP	Lee-Carter projection
all-cause (direct)	France	Men	2024	80.7023	81.8376	82.928	Projected	e0	LC	FRATNP	Lee-Carter projection
all-cause (direct)	France	Men	2025	80.8837	82.0521	83.1769	Projected	e0	LC	FRATNP	Lee-Carter projection
all-cause (direct)	France	Men	2026	81.0625	82.2641	83.415	Projected	e0	LC	FRATNP	Lee-Carter projection
all-cause (direct)	France	Men	2027	81.2356	82.4779	83.6569	Projected	e0	LC	FRATNP	Lee-Carter projection
all-cause (direct)	France	Men	2028	81.4137	82.6866	83.8966	Projected	e0	LC	FRATNP	Lee-Carter projection
all-cause (direct)	France	Men	2029	81.5891	82.8927	84.1317	Projected	e0	LC	FRATNP	Lee-Carter projection
all-cause (direct)	France	Men	2030	81.7687	83.1013	84.3584	Projected	e0	LC	FRATNP	Lee-Carter projection
all-cause (direct)	France	Men	2031	81.9439	83.3009	84.5783	Projected	e0	LC	FRATNP	Lee-Carter projection
all-cause (direct)	France	Men	2032	82.1211	83.5017	84.8024	Projected	e0	LC	FRATNP	Lee-Carter projection
all-cause (direct)	France	Men	2033	82.3028	83.7003	85.0223	Projected	e0	LC	FRATNP	Lee-Carter projection
all-cause (direct)	France	Men	2034	82.4772	83.8965	85.2384	Projected	e0	LC	FRATNP	Lee-Carter projection
all-cause (direct)	France	Men	2035	82.6516	84.0902	85.4508	Projected	e0	LC	FRATNP	Lee-Carter projection
all-cause (direct)	France	Men	2036	82.833	84.286	85.6531	Projected	e0	LC	FRATNP	Lee-Carter projection
all-cause (direct)	France	Men	2037	83.0025	84.4749	85.8588	Projected	e0	LC	FRATNP	Lee-Carter projection
all-cause (direct)	France	Men	2038	83.1786	84.6635	86.0622	Projected	e0	LC	FRATNP	Lee-Carter projection
all-cause (direct)	France	Men	2039	83.3513	84.8532	86.2603	Projected	e0	LC	FRATNP	Lee-Carter projection
all-cause (direct)	France	Men	2040	83.5165	85.0376	86.4566	Projected	e0	LC	FRATNP	Lee-Carter projection
all-cause (direct)	France	Men	2041	83.695	85.2196	86.654	Projected	e0	LC	FRATNP	Lee-Carter projection
all-cause (direct)	France	Men	2042	83.8567	85.4052	86.8487	Projected	e0	LC	FRATNP	Lee-Carter projection
all-cause (direct)	France	Men	2043	84.0238	85.583	87.0319	Projected	e0	LC	FRATNP	Lee-Carter projection
all-cause (direct)	France	Men	2044	84.1885	85.7631	87.215	Projected	e0	LC	FRATNP	Lee-Carter projection
all-cause (direct)	France	Men	2045	84.3483	85.9393	87.4012	Projected	e0	LC	FRATNP	Lee-Carter projection
all-cause (direct)	France	Men	2046	84.5105	86.1119	87.5799	Projected	e0	LC	FRATNP	Lee-Carter projection
all-cause (direct)	France	Men	2047	84.6687	86.2853	87.76	Projected	e0	LC	FRATNP	Lee-Carter projection
all-cause (direct)	France	Men	2048	84.8373	86.4567	87.9275	Projected	e0	LC	FRATNP	Lee-Carter projection
all-cause (direct)	France	Men	2049	85.0013	86.6257	88.108	Projected	e0	LC	FRATNP	Lee-Carter projection
all-cause (direct)	France	Men	2050	85.1646	86.7923	88.2831	Projected	e0	LC	FRATNP	Lee-Carter projection
all-cause (direct)	France	Men	2051	85.3339	86.9564	88.452	Projected	e0	LC	FRATNP	Lee-Carter projection
all-cause (direct)	France	Men	2052	85.4816	87.1209	88.6146	Projected	e0	LC	FRATNP	Lee-Carter projection
all-cause (direct)	France	Men	2053	85.6265	87.283	88.7798	Projected	e0	LC	FRATNP	Lee-Carter projection
all-cause (direct)	France	Men	2054	85.7978	87.4439	88.9461	Projected	e0	LC	FRATNP	Lee-Carter projection
all-cause (direct)	France	Men	2055	85.9466	87.5997	89.1114	Projected	e0	LC	FRATNP	Lee-Carter projection
all-cause (direct)	France	Men	2056	86.1054	87.7589	89.2658	Projected	e0	LC	FRATNP	Lee-Carter projection
all-cause (direct)	France	Men	2057	86.2513	87.914	89.4272	Projected	e0	LC	FRATNP	Lee-Carter projection
all-cause (direct)	France	Men	2058	86.3945	88.0685	89.5863	Projected	e0	LC	FRATNP	Lee-Carter projection
all-cause (direct)	France	Men	2059	86.5493	88.2242	89.7392	Projected	e0	LC	FRATNP	Lee-Carter projection
all-cause (direct)	France	Men	2060	86.7011	88.3755	89.8872	Projected	e0	LC	FRATNP	Lee-Carter projection
all-cause (direct)	France	Men	2061	86.8553	88.5262	90.0445	Projected	e0	LC	FRATNP	Lee-Carter projection
all-cause (direct)	France	Men	2062	86.998	88.6753	90.1871	Projected	e0	LC	FRATNP	Lee-Carter projection
all-cause (direct)	France	Men	2063	87.1495	88.8205	90.3308	Projected	e0	LC	FRATNP	Lee-Carter projection
all-cause (direct)	France	Men	2064	87.2877	88.965	90.4754	Projected	e0	LC	FRATNP	Lee-Carter projection
all-cause (direct)	France	Men	2065	87.4297	89.1094	90.619	Projected	e0	LC	FRATNP	Lee-Carter projection
all-cause (indirect)	France	Men	2015	79.3353	80.1136	80.86	Projected	e0	LL	FRATNP	Our projection
all-cause (indirect)	France	Men	2016	79.4382	80.4001	81.3152	Projected	e0	LL	FRATNP	Our projection
all-cause (indirect)	France	Men	2017	79.6323	80.703	81.7184	Projected	e0	LL	FRATNP	Our projection
all-cause (indirect)	France	Men	2018	79.8173	81.0016	82.1195	Projected	e0	LL	FRATNP	Our projection
all-cause (indirect)	France	Men	2019	80.0298	81.3017	82.4864	Projected	e0	LL	FRATNP	Our projection
all-cause (indirect)	France	Men	2020	80.2427	81.5976	82.8581	Projected	e0	LL	FRATNP	Our projection
all-cause (indirect)	France	Men	2021	80.473	81.8911	83.2121	Projected	e0	LL	FRATNP	Our projection
all-cause (indirect)	France	Men	2022	80.6853	82.1791	83.547	Projected	e0	LL	FRATNP	Our projection
all-cause (indirect)	France	Men	2023	80.9184	82.466	83.8765	Projected	e0	LL	FRATNP	Our projection
all-cause (indirect)	France	Men	2024	81.1397	82.7512	84.1956	Projected	e0	LL	FRATNP	Our projection
all-cause (indirect)	France	Men	2025	81.3712	83.0247	84.5022	Projected	e0	LL	FRATNP	Our projection
all-cause (indirect)	France	Men	2026	81.6165	83.3066	84.8026	Projected	e0	LL	FRATNP	Our projection
all-cause (indirect)	France	Men	2027	81.8534	83.5721	85.1012	Projected	e0	LL	FRATNP	Our projection
all-cause (indirect)	France	Men	2028	82.0929	83.8427	85.3869	Projected	e0	LL	FRATNP	Our projection
all-cause (indirect)	France	Men	2029	82.3369	84.106	85.6771	Projected	e0	LL	FRATNP	Our projection
all-cause (indirect)	France	Men	2030	82.5763	84.3721	85.9491	Projected	e0	LL	FRATNP	Our projection
all-cause (indirect)	France	Men	2031	82.8125	84.6324	86.2259	Projected	e0	LL	FRATNP	Our projection
all-cause (indirect)	France	Men	2032	83.0484	84.8849	86.4915	Projected	e0	LL	FRATNP	Our projection
all-cause (indirect)	France	Men	2033	83.2857	85.1397	86.7602	Projected	e0	LL	FRATNP	Our projection
all-cause (indirect)	France	Men	2034	83.5204	85.3841	87.0198	Projected	e0	LL	FRATNP	Our projection
all-cause (indirect)	France	Men	2035	83.7378	85.6307	87.2533	Projected	e0	LL	FRATNP	Our projection
all-cause (indirect)	France	Men	2036	83.9662	85.8735	87.5195	Projected	e0	LL	FRATNP	Our projection
all-cause (indirect)	France	Men	2037	84.1865	86.1128	87.7617	Projected	e0	LL	FRATNP	Our projection
all-cause (indirect)	France	Men	2038	84.4184	86.3456	87.9968	Projected	e0	LL	FRATNP	Our projection
all-cause (indirect)	France	Men	2039	84.6399	86.576	88.233	Projected	e0	LL	FRATNP	Our projection
all-cause (indirect)	France	Men	2040	84.8743	86.8011	88.4669	Projected	e0	LL	FRATNP	Our projection
all-cause (indirect)	France	Men	2041	85.0818	87.0265	88.6801	Projected	e0	LL	FRATNP	Our projection
all-cause (indirect)	France	Men	2042	85.2885	87.2419	88.9014	Projected	e0	LL	FRATNP	Our projection
all-cause (indirect)	France	Men	2043	85.5159	87.4563	89.1101	Projected	e0	LL	FRATNP	Our projection
all-cause (indirect)	France	Men	2044	85.7098	87.6655	89.3255	Projected	e0	LL	FRATNP	Our projection
all-cause (indirect)	France	Men	2045	85.9203	87.8733	89.5302	Projected	e0	LL	FRATNP	Our projection
all-cause (indirect)	France	Men	2046	86.1349	88.0818	89.7301	Projected	e0	LL	FRATNP	Our projection
all-cause (indirect)	France	Men	2047	86.3399	88.2827	89.9259	Projected	e0	LL	FRATNP	Our projection
all-cause (indirect)	France	Men	2048	86.5393	88.4829	90.1227	Projected	e0	LL	FRATNP	Our projection
all-cause (indirect)	France	Men	2049	86.7412	88.6758	90.314	Projected	e0	LL	FRATNP	Our projection
all-cause (indirect)	France	Men	2050	86.9383	88.867	90.4988	Projected	e0	LL	FRATNP	Our projection
all-cause (indirect)	France	Men	2051	87.1245	89.0539	90.6697	Projected	e0	LL	FRATNP	Our projection
all-cause (indirect)	France	Men	2052	87.3201	89.2365	90.8454	Projected	e0	LL	FRATNP	Our projection
all-cause (indirect)	France	Men	2053	87.5121	89.4249	91.0147	Projected	e0	LL	FRATNP	Our projection
all-cause (indirect)	France	Men	2054	87.6911	89.6041	91.1932	Projected	e0	LL	FRATNP	Our projection
all-cause (indirect)	France	Men	2055	87.8799	89.7844	91.3655	Projected	e0	LL	FRATNP	Our projection
all-cause (indirect)	France	Men	2056	88.0456	89.9582	91.5251	Projected	e0	LL	FRATNP	Our projection
all-cause (indirect)	France	Men	2057	88.2334	90.1236	91.685	Projected	e0	LL	FRATNP	Our projection
all-cause (indirect)	France	Men	2058	88.4077	90.2926	91.8494	Projected	e0	LL	FRATNP	Our projection
all-cause (indirect)	France	Men	2059	88.5852	90.4586	92.0073	Projected	e0	LL	FRATNP	Our projection
all-cause (indirect)	France	Men	2060	88.741	90.6194	92.1605	Projected	e0	LL	FRATNP	Our projection
all-cause (indirect)	France	Men	2061	88.9123	90.7813	92.31	Projected	e0	LL	FRATNP	Our projection
all-cause (indirect)	France	Men	2062	89.0728	90.941	92.4576	Projected	e0	LL	FRATNP	Our projection
all-cause (indirect)	France	Men	2063	89.2437	91.0949	92.5998	Projected	e0	LL	FRATNP	Our projection
all-cause (indirect)	France	Men	2064	89.3978	91.2479	92.7428	Projected	e0	LL	FRATNP	Our projection
all-cause (indirect)	France	Men	2065	89.5688	91.3952	92.8823	Projected	e0	LL	FRATNP	Our projection
all-cause (direct)	Germany	Men	1990		71.9098		Observed	e0	LC	DEUTNP	Observed
all-cause (direct)	Germany	Men	1991		72.0939		Observed	e0	LC	DEUTNP	Observed
all-cause (direct)	Germany	Men	1992		72.5286		Observed	e0	LC	DEUTNP	Observed
all-cause (direct)	Germany	Men	1993		72.6334		Observed	e0	LC	DEUTNP	Observed
all-cause (direct)	Germany	Men	1994		72.9468		Observed	e0	LC	DEUTNP	Observed
all-cause (direct)	Germany	Men	1995		73.1183		Observed	e0	LC	DEUTNP	Observed
all-cause (direct)	Germany	Men	1996		73.4201		Observed	e0	LC	DEUTNP	Observed
all-cause (direct)	Germany	Men	1997		73.8777		Observed	e0	LC	DEUTNP	Observed
all-cause (direct)	Germany	Men	1998		74.3144		Observed	e0	LC	DEUTNP	Observed
all-cause (direct)	Germany	Men	1999		74.5748		Observed	e0	LC	DEUTNP	Observed
all-cause (direct)	Germany	Men	2000		74.8565		Observed	e0	LC	DEUTNP	Observed
all-cause (direct)	Germany	Men	2001		75.2753		Observed	e0	LC	DEUTNP	Observed
all-cause (direct)	Germany	Men	2002		75.439		Observed	e0	LC	DEUTNP	Observed
all-cause (direct)	Germany	Men	2003		75.514		Observed	e0	LC	DEUTNP	Observed
all-cause (direct)	Germany	Men	2004		76.1484		Observed	e0	LC	DEUTNP	Observed
all-cause (direct)	Germany	Men	2005		76.3549		Observed	e0	LC	DEUTNP	Observed
all-cause (direct)	Germany	Men	2006		76.7511		Observed	e0	LC	DEUTNP	Observed
all-cause (direct)	Germany	Men	2007		76.9116		Observed	e0	LC	DEUTNP	Observed
all-cause (direct)	Germany	Men	2008		77.1052		Observed	e0	LC	DEUTNP	Observed
all-cause (direct)	Germany	Men	2009		77.2337		Observed	e0	LC	DEUTNP	Observed
all-cause (direct)	Germany	Men	2010		77.4334		Observed	e0	LC	DEUTNP	Observed
all-cause (direct)	Germany	Men	2011		77.7714		Observed	e0	LC	DEUTNP	Observed
all-cause (direct)	Germany	Men	2012		77.9655		Observed	e0	LC	DEUTNP	Observed
all-cause (direct)	Germany	Men	2013		77.9827		Observed	e0	LC	DEUTNP	Observed
all-cause (direct)	Germany	Men	2014		78.4329		Observed	e0	LC	DEUTNP	Observed
all-cause (direct)	Germany	Men	2015	78.5805	78.9846	79.3812	Projected	e0	LC	DEUTNP	Lee-Carter projection
all-cause (direct)	Germany	Men	2016	78.7365	79.2236	79.7082	Projected	e0	LC	DEUTNP	Lee-Carter projection
all-cause (direct)	Germany	Men	2017	78.9063	79.4618	80.0087	Projected	e0	LC	DEUTNP	Lee-Carter projection
all-cause (direct)	Germany	Men	2018	79.0761	79.7	80.3037	Projected	e0	LC	DEUTNP	Lee-Carter projection
all-cause (direct)	Germany	Men	2019	79.2597	79.9344	80.5832	Projected	e0	LC	DEUTNP	Lee-Carter projection
all-cause (direct)	Germany	Men	2020	79.446	80.1651	80.8605	Projected	e0	LC	DEUTNP	Lee-Carter projection
all-cause (direct)	Germany	Men	2021	79.6332	80.3928	81.1312	Projected	e0	LC	DEUTNP	Lee-Carter projection
all-cause (direct)	Germany	Men	2022	79.8237	80.6204	81.3937	Projected	e0	LC	DEUTNP	Lee-Carter projection
all-cause (direct)	Germany	Men	2023	80.0145	80.845	81.6524	Projected	e0	LC	DEUTNP	Lee-Carter projection
all-cause (direct)	Germany	Men	2024	80.1969	81.0685	81.909	Projected	e0	LC	DEUTNP	Lee-Carter projection
all-cause (direct)	Germany	Men	2025	80.3905	81.2901	82.1551	Projected	e0	LC	DEUTNP	Lee-Carter projection
all-cause (direct)	Germany	Men	2026	80.5776	81.5075	82.3966	Projected	e0	LC	DEUTNP	Lee-Carter projection
all-cause (direct)	Germany	Men	2027	80.7631	81.7214	82.6371	Projected	e0	LC	DEUTNP	Lee-Carter projection
all-cause (direct)	Germany	Men	2028	80.9509	81.9363	82.8729	Projected	e0	LC	DEUTNP	Lee-Carter projection
all-cause (direct)	Germany	Men	2029	81.1433	82.1485	83.1026	Projected	e0	LC	DEUTNP	Lee-Carter projection
all-cause (direct)	Germany	Men	2030	81.3303	82.3571	83.3247	Projected	e0	LC	DEUTNP	Lee-Carter projection
all-cause (direct)	Germany	Men	2031	81.5207	82.5616	83.5537	Projected	e0	LC	DEUTNP	Lee-Carter projection
all-cause (direct)	Germany	Men	2032	81.7044	82.7656	83.7709	Projected	e0	LC	DEUTNP	Lee-Carter projection
all-cause (direct)	Germany	Men	2033	81.8934	82.9675	83.9861	Projected	e0	LC	DEUTNP	Lee-Carter projection
all-cause (direct)	Germany	Men	2034	82.0702	83.1685	84.1989	Projected	e0	LC	DEUTNP	Lee-Carter projection
all-cause (direct)	Germany	Men	2035	82.259	83.3659	84.4117	Projected	e0	LC	DEUTNP	Lee-Carter projection
all-cause (direct)	Germany	Men	2036	82.4402	83.5611	84.6115	Projected	e0	LC	DEUTNP	Lee-Carter projection
all-cause (direct)	Germany	Men	2037	82.6219	83.7538	84.8166	Projected	e0	LC	DEUTNP	Lee-Carter projection
all-cause (direct)	Germany	Men	2038	82.8045	83.9471	85.0201	Projected	e0	LC	DEUTNP	Lee-Carter projection
all-cause (direct)	Germany	Men	2039	82.982	84.1366	85.2211	Projected	e0	LC	DEUTNP	Lee-Carter projection
all-cause (direct)	Germany	Men	2040	83.1567	84.3231	85.4186	Projected	e0	LC	DEUTNP	Lee-Carter projection
all-cause (direct)	Germany	Men	2041	83.3328	84.5089	85.6111	Projected	e0	LC	DEUTNP	Lee-Carter projection
all-cause (direct)	Germany	Men	2042	83.5072	84.6928	85.8017	Projected	e0	LC	DEUTNP	Lee-Carter projection
all-cause (direct)	Germany	Men	2043	83.6764	84.8737	85.9855	Projected	e0	LC	DEUTNP	Lee-Carter projection
all-cause (direct)	Germany	Men	2044	83.8473	85.0515	86.1715	Projected	e0	LC	DEUTNP	Lee-Carter projection
all-cause (direct)	Germany	Men	2045	84.0198	85.2266	86.3502	Projected	e0	LC	DEUTNP	Lee-Carter projection
all-cause (direct)	Germany	Men	2046	84.1875	85.4011	86.53	Projected	e0	LC	DEUTNP	Lee-Carter projection
all-cause (direct)	Germany	Men	2047	84.3446	85.5736	86.7132	Projected	e0	LC	DEUTNP	Lee-Carter projection
all-cause (direct)	Germany	Men	2048	84.5164	85.7447	86.8868	Projected	e0	LC	DEUTNP	Lee-Carter projection
all-cause (direct)	Germany	Men	2049	84.6811	85.9149	87.0523	Projected	e0	LC	DEUTNP	Lee-Carter projection
all-cause (direct)	Germany	Men	2050	84.8439	86.0821	87.2179	Projected	e0	LC	DEUTNP	Lee-Carter projection
all-cause (direct)	Germany	Men	2051	85.0115	86.2478	87.3863	Projected	e0	LC	DEUTNP	Lee-Carter projection
all-cause (direct)	Germany	Men	2052	85.168	86.4092	87.5506	Projected	e0	LC	DEUTNP	Lee-Carter projection
all-cause (direct)	Germany	Men	2053	85.3283	86.5698	87.7148	Projected	e0	LC	DEUTNP	Lee-Carter projection
all-cause (direct)	Germany	Men	2054	85.4878	86.732	87.8696	Projected	e0	LC	DEUTNP	Lee-Carter projection
all-cause (direct)	Germany	Men	2055	85.6516	86.8894	88.0302	Projected	e0	LC	DEUTNP	Lee-Carter projection
all-cause (direct)	Germany	Men	2056	85.8085	87.0429	88.1842	Projected	e0	LC	DEUTNP	Lee-Carter projection
all-cause (direct)	Germany	Men	2057	85.969	87.1983	88.3403	Projected	e0	LC	DEUTNP	Lee-Carter projection
all-cause (direct)	Germany	Men	2058	86.1123	87.3511	88.4881	Projected	e0	LC	DEUTNP	Lee-Carter projection
all-cause (direct)	Germany	Men	2059	86.2645	87.4999	88.6379	Projected	e0	LC	DEUTNP	Lee-Carter projection
all-cause (direct)	Germany	Men	2060	86.4164	87.6489	88.7808	Projected	e0	LC	DEUTNP	Lee-Carter projection
all-cause (direct)	Germany	Men	2061	86.5646	87.7936	88.9196	Projected	e0	LC	DEUTNP	Lee-Carter projection
all-cause (direct)	Germany	Men	2062	86.7084	87.9392	89.0639	Projected	e0	LC	DEUTNP	Lee-Carter projection
all-cause (direct)	Germany	Men	2063	86.854	88.0811	89.2041	Projected	e0	LC	DEUTNP	Lee-Carter projection
all-cause (direct)	Germany	Men	2064	86.9978	88.219	89.3486	Projected	e0	LC	DEUTNP	Lee-Carter projection
all-cause (direct)	Germany	Men	2065	87.14	88.3561	89.4813	Projected	e0	LC	DEUTNP	Lee-Carter projection
all-cause (indirect)	Germany	Men	2015	78.2839	79.1275	79.9241	Projected	e0	LL	DEUTNP	Our projection
all-cause (indirect)	Germany	Men	2016	78.4323	79.4576	80.4276	Projected	e0	LL	DEUTNP	Our projection
all-cause (indirect)	Germany	Men	2017	78.5916	79.7506	80.8077	Projected	e0	LL	DEUTNP	Our projection
all-cause (indirect)	Germany	Men	2018	78.7572	80.0399	81.2071	Projected	e0	LL	DEUTNP	Our projection
all-cause (indirect)	Germany	Men	2019	78.945	80.3263	81.5683	Projected	e0	LL	DEUTNP	Our projection
all-cause (indirect)	Germany	Men	2020	79.1484	80.6094	81.9317	Projected	e0	LL	DEUTNP	Our projection
all-cause (indirect)	Germany	Men	2021	79.3465	80.8856	82.2667	Projected	e0	LL	DEUTNP	Our projection
all-cause (indirect)	Germany	Men	2022	79.5621	81.1697	82.5977	Projected	e0	LL	DEUTNP	Our projection
all-cause (indirect)	Germany	Men	2023	79.7546	81.4387	82.9139	Projected	e0	LL	DEUTNP	Our projection
all-cause (indirect)	Germany	Men	2024	79.9678	81.7102	83.2274	Projected	e0	LL	DEUTNP	Our projection
all-cause (indirect)	Germany	Men	2025	80.1674	81.9702	83.5411	Projected	e0	LL	DEUTNP	Our projection
all-cause (indirect)	Germany	Men	2026	80.3992	82.2364	83.8367	Projected	e0	LL	DEUTNP	Our projection
all-cause (indirect)	Germany	Men	2027	80.6068	82.4963	84.1413	Projected	e0	LL	DEUTNP	Our projection
all-cause (indirect)	Germany	Men	2028	80.8301	82.75	84.4124	Projected	e0	LL	DEUTNP	Our projection
all-cause (indirect)	Germany	Men	2029	81.0506	83.0019	84.7056	Projected	e0	LL	DEUTNP	Our projection
all-cause (indirect)	Germany	Men	2030	81.2655	83.2499	84.9646	Projected	e0	LL	DEUTNP	Our projection
all-cause (indirect)	Germany	Men	2031	81.4705	83.4954	85.2134	Projected	e0	LL	DEUTNP	Our projection
all-cause (indirect)	Germany	Men	2032	81.6777	83.7319	85.4809	Projected	e0	LL	DEUTNP	Our projection
all-cause (indirect)	Germany	Men	2033	81.8891	83.9732	85.7406	Projected	e0	LL	DEUTNP	Our projection
all-cause (indirect)	Germany	Men	2034	82.0796	84.2049	85.9879	Projected	e0	LL	DEUTNP	Our projection
all-cause (indirect)	Germany	Men	2035	82.2991	84.4347	86.2373	Projected	e0	LL	DEUTNP	Our projection
all-cause (indirect)	Germany	Men	2036	82.5105	84.6611	86.4698	Projected	e0	LL	DEUTNP	Our projection
all-cause (indirect)	Germany	Men	2037	82.6991	84.8827	86.7159	Projected	e0	LL	DEUTNP	Our projection
all-cause (indirect)	Germany	Men	2038	82.8955	85.1107	86.9416	Projected	e0	LL	DEUTNP	Our projection
all-cause (indirect)	Germany	Men	2039	83.0962	85.3289	87.1568	Projected	e0	LL	DEUTNP	Our projection
all-cause (indirect)	Germany	Men	2040	83.2998	85.5404	87.3863	Projected	e0	LL	DEUTNP	Our projection
all-cause (indirect)	Germany	Men	2041	83.4828	85.7537	87.6144	Projected	e0	LL	DEUTNP	Our projection
all-cause (indirect)	Germany	Men	2042	83.6901	85.9615	87.831	Projected	e0	LL	DEUTNP	Our projection
all-cause (indirect)	Germany	Men	2043	83.8755	86.1693	88.0404	Projected	e0	LL	DEUTNP	Our projection
all-cause (indirect)	Germany	Men	2044	84.0893	86.3776	88.2501	Projected	e0	LL	DEUTNP	Our projection
all-cause (indirect)	Germany	Men	2045	84.2822	86.5822	88.4535	Projected	e0	LL	DEUTNP	Our projection
all-cause (indirect)	Germany	Men	2046	84.4767	86.7798	88.6558	Projected	e0	LL	DEUTNP	Our projection
all-cause (indirect)	Germany	Men	2047	84.6604	86.9826	88.8651	Projected	e0	LL	DEUTNP	Our projection
all-cause (indirect)	Germany	Men	2048	84.8585	87.1751	89.0621	Projected	e0	LL	DEUTNP	Our projection
all-cause (indirect)	Germany	Men	2049	85.055	87.3706	89.2518	Projected	e0	LL	DEUTNP	Our projection
all-cause (indirect)	Germany	Men	2050	85.2428	87.5632	89.444	Projected	e0	LL	DEUTNP	Our projection
all-cause (indirect)	Germany	Men	2051	85.4275	87.7538	89.6369	Projected	e0	LL	DEUTNP	Our projection
all-cause (indirect)	Germany	Men	2052	85.611	87.9442	89.8138	Projected	e0	LL	DEUTNP	Our projection
all-cause (indirect)	Germany	Men	2053	85.7999	88.1231	90.0051	Projected	e0	LL	DEUTNP	Our projection
all-cause (indirect)	Germany	Men	2054	85.9939	88.3117	90.1918	Projected	e0	LL	DEUTNP	Our projection
all-cause (indirect)	Germany	Men	2055	86.1697	88.4947	90.3594	Projected	e0	LL	DEUTNP	Our projection
all-cause (indirect)	Germany	Men	2056	86.3524	88.669	90.5446	Projected	e0	LL	DEUTNP	Our projection
all-cause (indirect)	Germany	Men	2057	86.5345	88.8441	90.7122	Projected	e0	LL	DEUTNP	Our projection
all-cause (indirect)	Germany	Men	2058	86.7014	89.0184	90.879	Projected	e0	LL	DEUTNP	Our projection
all-cause (indirect)	Germany	Men	2059	86.8757	89.1914	91.0414	Projected	e0	LL	DEUTNP	Our projection
all-cause (indirect)	Germany	Men	2060	87.0594	89.3643	91.2118	Projected	e0	LL	DEUTNP	Our projection
all-cause (indirect)	Germany	Men	2061	87.2249	89.5279	91.3632	Projected	e0	LL	DEUTNP	Our projection
all-cause (indirect)	Germany	Men	2062	87.4006	89.6925	91.5232	Projected	e0	LL	DEUTNP	Our projection
all-cause (indirect)	Germany	Men	2063	87.5704	89.8555	91.6848	Projected	e0	LL	DEUTNP	Our projection
all-cause (indirect)	Germany	Men	2064	87.742	90.0221	91.8334	Projected	e0	LL	DEUTNP	Our projection
all-cause (indirect)	Germany	Men	2065	87.8933	90.176	91.9895	Projected	e0	LL	DEUTNP	Our projection
all-cause (direct)	Greece	Men	1990		74.6593		Observed	e0	LC	GRC	Observed
all-cause (direct)	Greece	Men	1991		74.6591		Observed	e0	LC	GRC	Observed
all-cause (direct)	Greece	Men	1992		74.6178		Observed	e0	LC	GRC	Observed
all-cause (direct)	Greece	Men	1993		74.8718		Observed	e0	LC	GRC	Observed
all-cause (direct)	Greece	Men	1994		75.0501		Observed	e0	LC	GRC	Observed
all-cause (direct)	Greece	Men	1995		74.9266		Observed	e0	LC	GRC	Observed
all-cause (direct)	Greece	Men	1996		75.0424		Observed	e0	LC	GRC	Observed
all-cause (direct)	Greece	Men	1997		75.4238		Observed	e0	LC	GRC	Observed
all-cause (direct)	Greece	Men	1998		75.5054		Observed	e0	LC	GRC	Observed
all-cause (direct)	Greece	Men	1999		75.5575		Observed	e0	LC	GRC	Observed
all-cause (direct)	Greece	Men	2000		75.6578		Observed	e0	LC	GRC	Observed
all-cause (direct)	Greece	Men	2001		76.1288		Observed	e0	LC	GRC	Observed
all-cause (direct)	Greece	Men	2002		76.4045		Observed	e0	LC	GRC	Observed
all-cause (direct)	Greece	Men	2003		76.5879		Observed	e0	LC	GRC	Observed
all-cause (direct)	Greece	Men	2004		76.689		Observed	e0	LC	GRC	Observed
all-cause (direct)	Greece	Men	2005		76.8499		Observed	e0	LC	GRC	Observed
all-cause (direct)	Greece	Men	2006		77.1555		Observed	e0	LC	GRC	Observed
all-cause (direct)	Greece	Men	2007		76.939		Observed	e0	LC	GRC	Observed
all-cause (direct)	Greece	Men	2008		77.4746		Observed	e0	LC	GRC	Observed
all-cause (direct)	Greece	Men	2009		77.4864		Observed	e0	LC	GRC	Observed
all-cause (direct)	Greece	Men	2010		77.8727		Observed	e0	LC	GRC	Observed
all-cause (direct)	Greece	Men	2011		77.8784		Observed	e0	LC	GRC	Observed
all-cause (direct)	Greece	Men	2012		77.8215		Observed	e0	LC	GRC	Observed
all-cause (direct)	Greece	Men	2013		78.4472		Observed	e0	LC	GRC	Observed
all-cause (direct)	Greece	Men	2014		78.4575		Observed	e0	LC	GRC	Observed
all-cause (direct)	Greece	Men	2015	78.2263	78.7538	79.2626	Projected	e0	LC	GRC	Lee-Carter projection
all-cause (direct)	Greece	Men	2016	78.2553	78.8981	79.5224	Projected	e0	LC	GRC	Lee-Carter projection
all-cause (direct)	Greece	Men	2017	78.3049	79.0459	79.7605	Projected	e0	LC	GRC	Lee-Carter projection
all-cause (direct)	Greece	Men	2018	78.3607	79.1856	79.9879	Projected	e0	LC	GRC	Lee-Carter projection
all-cause (direct)	Greece	Men	2019	78.4258	79.3251	80.1957	Projected	e0	LC	GRC	Lee-Carter projection
all-cause (direct)	Greece	Men	2020	78.4989	79.468	80.4006	Projected	e0	LC	GRC	Lee-Carter projection
all-cause (direct)	Greece	Men	2021	78.5783	79.6103	80.5898	Projected	e0	LC	GRC	Lee-Carter projection
all-cause (direct)	Greece	Men	2022	78.6631	79.75	80.7848	Projected	e0	LC	GRC	Lee-Carter projection
all-cause (direct)	Greece	Men	2023	78.7483	79.8942	80.9748	Projected	e0	LC	GRC	Lee-Carter projection
all-cause (direct)	Greece	Men	2024	78.8461	80.0277	81.1551	Projected	e0	LC	GRC	Lee-Carter projection
all-cause (direct)	Greece	Men	2025	78.9355	80.1636	81.3318	Projected	e0	LC	GRC	Lee-Carter projection
all-cause (direct)	Greece	Men	2026	79.0255	80.3005	81.5125	Projected	e0	LC	GRC	Lee-Carter projection
all-cause (direct)	Greece	Men	2027	79.1172	80.4349	81.6854	Projected	e0	LC	GRC	Lee-Carter projection
all-cause (direct)	Greece	Men	2028	79.2202	80.5716	81.8477	Projected	e0	LC	GRC	Lee-Carter projection
all-cause (direct)	Greece	Men	2029	79.31	80.706	82.0213	Projected	e0	LC	GRC	Lee-Carter projection
all-cause (direct)	Greece	Men	2030	79.4177	80.8377	82.1897	Projected	e0	LC	GRC	Lee-Carter projection
all-cause (direct)	Greece	Men	2031	79.5126	80.9744	82.3569	Projected	e0	LC	GRC	Lee-Carter projection
all-cause (direct)	Greece	Men	2032	79.6168	81.1039	82.5189	Projected	e0	LC	GRC	Lee-Carter projection
all-cause (direct)	Greece	Men	2033	79.7146	81.234	82.6724	Projected	e0	LC	GRC	Lee-Carter projection
all-cause (direct)	Greece	Men	2034	79.8045	81.3657	82.8276	Projected	e0	LC	GRC	Lee-Carter projection
all-cause (direct)	Greece	Men	2035	79.9092	81.4968	82.9878	Projected	e0	LC	GRC	Lee-Carter projection
all-cause (direct)	Greece	Men	2036	80.0141	81.6243	83.1475	Projected	e0	LC	GRC	Lee-Carter projection
all-cause (direct)	Greece	Men	2037	80.1148	81.7524	83.3054	Projected	e0	LC	GRC	Lee-Carter projection
all-cause (direct)	Greece	Men	2038	80.2127	81.8774	83.4515	Projected	e0	LC	GRC	Lee-Carter projection
all-cause (direct)	Greece	Men	2039	80.3076	82.0063	83.5814	Projected	e0	LC	GRC	Lee-Carter projection
all-cause (direct)	Greece	Men	2040	80.4102	82.1335	83.7265	Projected	e0	LC	GRC	Lee-Carter projection
all-cause (direct)	Greece	Men	2041	80.5068	82.2571	83.8704	Projected	e0	LC	GRC	Lee-Carter projection
all-cause (direct)	Greece	Men	2042	80.6035	82.3818	84.0082	Projected	e0	LC	GRC	Lee-Carter projection
all-cause (direct)	Greece	Men	2043	80.7106	82.5094	84.1532	Projected	e0	LC	GRC	Lee-Carter projection
all-cause (direct)	Greece	Men	2044	80.8103	82.6316	84.2934	Projected	e0	LC	GRC	Lee-Carter projection
all-cause (direct)	Greece	Men	2045	80.9219	82.7534	84.4406	Projected	e0	LC	GRC	Lee-Carter projection
all-cause (direct)	Greece	Men	2046	81.0171	82.8751	84.5833	Projected	e0	LC	GRC	Lee-Carter projection
all-cause (direct)	Greece	Men	2047	81.1219	82.9976	84.7217	Projected	e0	LC	GRC	Lee-Carter projection
all-cause (direct)	Greece	Men	2048	81.2247	83.117	84.8578	Projected	e0	LC	GRC	Lee-Carter projection
all-cause (direct)	Greece	Men	2049	81.3314	83.2379	84.9908	Projected	e0	LC	GRC	Lee-Carter projection
all-cause (direct)	Greece	Men	2050	81.4324	83.3577	85.1236	Projected	e0	LC	GRC	Lee-Carter projection
all-cause (direct)	Greece	Men	2051	81.5464	83.4768	85.258	Projected	e0	LC	GRC	Lee-Carter projection
all-cause (direct)	Greece	Men	2052	81.642	83.6001	85.3757	Projected	e0	LC	GRC	Lee-Carter projection
all-cause (direct)	Greece	Men	2053	81.7411	83.7151	85.5055	Projected	e0	LC	GRC	Lee-Carter projection
all-cause (direct)	Greece	Men	2054	81.8523	83.8302	85.6287	Projected	e0	LC	GRC	Lee-Carter projection
all-cause (direct)	Greece	Men	2055	81.9446	83.9448	85.7574	Projected	e0	LC	GRC	Lee-Carter projection
all-cause (direct)	Greece	Men	2056	82.0433	84.0582	85.8834	Projected	e0	LC	GRC	Lee-Carter projection
all-cause (direct)	Greece	Men	2057	82.1505	84.1733	86.0019	Projected	e0	LC	GRC	Lee-Carter projection
all-cause (direct)	Greece	Men	2058	82.2422	84.2912	86.1274	Projected	e0	LC	GRC	Lee-Carter projection
all-cause (direct)	Greece	Men	2059	82.3477	84.4069	86.2575	Projected	e0	LC	GRC	Lee-Carter projection
all-cause (direct)	Greece	Men	2060	82.4473	84.5175	86.3717	Projected	e0	LC	GRC	Lee-Carter projection
all-cause (direct)	Greece	Men	2061	82.5534	84.6284	86.4974	Projected	e0	LC	GRC	Lee-Carter projection
all-cause (direct)	Greece	Men	2062	82.6486	84.7399	86.6125	Projected	e0	LC	GRC	Lee-Carter projection
all-cause (direct)	Greece	Men	2063	82.7449	84.8481	86.7327	Projected	e0	LC	GRC	Lee-Carter projection
all-cause (direct)	Greece	Men	2064	82.833	84.9566	86.849	Projected	e0	LC	GRC	Lee-Carter projection
all-cause (direct)	Greece	Men	2065	82.9456	85.0685	86.9712	Projected	e0	LC	GRC	Lee-Carter projection
all-cause (indirect)	Greece	Men	2015	78.1384	79.3172	80.4086	Projected	e0	LL	GRC	Our projection
all-cause (indirect)	Greece	Men	2016	78.1484	79.5948	80.8963	Projected	e0	LL	GRC	Our projection
all-cause (indirect)	Greece	Men	2017	78.2915	79.9165	81.3802	Projected	e0	LL	GRC	Our projection
all-cause (indirect)	Greece	Men	2018	78.3972	80.1939	81.786	Projected	e0	LL	GRC	Our projection
all-cause (indirect)	Greece	Men	2019	78.571	80.4948	82.1803	Projected	e0	LL	GRC	Our projection
all-cause (indirect)	Greece	Men	2020	78.7387	80.788	82.5726	Projected	e0	LL	GRC	Our projection
all-cause (indirect)	Greece	Men	2021	78.9153	81.0746	82.9292	Projected	e0	LL	GRC	Our projection
all-cause (indirect)	Greece	Men	2022	79.0946	81.3615	83.2924	Projected	e0	LL	GRC	Our projection
all-cause (indirect)	Greece	Men	2023	79.2906	81.6532	83.6411	Projected	e0	LL	GRC	Our projection
all-cause (indirect)	Greece	Men	2024	79.484	81.9344	83.9768	Projected	e0	LL	GRC	Our projection
all-cause (indirect)	Greece	Men	2025	79.6957	82.2161	84.2892	Projected	e0	LL	GRC	Our projection
all-cause (indirect)	Greece	Men	2026	79.8918	82.502	84.6299	Projected	e0	LL	GRC	Our projection
all-cause (indirect)	Greece	Men	2027	80.1166	82.772	84.9198	Projected	e0	LL	GRC	Our projection
all-cause (indirect)	Greece	Men	2028	80.32	83.0535	85.2497	Projected	e0	LL	GRC	Our projection
all-cause (indirect)	Greece	Men	2029	80.57	83.3235	85.5502	Projected	e0	LL	GRC	Our projection
all-cause (indirect)	Greece	Men	2030	80.779	83.5934	85.8388	Projected	e0	LL	GRC	Our projection
all-cause (indirect)	Greece	Men	2031	81.0084	83.851	86.1271	Projected	e0	LL	GRC	Our projection
all-cause (indirect)	Greece	Men	2032	81.2415	84.1204	86.4062	Projected	e0	LL	GRC	Our projection
all-cause (indirect)	Greece	Men	2033	81.457	84.3849	86.6918	Projected	e0	LL	GRC	Our projection
all-cause (indirect)	Greece	Men	2034	81.6935	84.6405	86.9593	Projected	e0	LL	GRC	Our projection
all-cause (indirect)	Greece	Men	2035	81.9191	84.904	87.2332	Projected	e0	LL	GRC	Our projection
all-cause (indirect)	Greece	Men	2036	82.1397	85.1545	87.4984	Projected	e0	LL	GRC	Our projection
all-cause (indirect)	Greece	Men	2037	82.3948	85.406	87.7543	Projected	e0	LL	GRC	Our projection
all-cause (indirect)	Greece	Men	2038	82.6208	85.655	88.0003	Projected	e0	LL	GRC	Our projection
all-cause (indirect)	Greece	Men	2039	82.8358	85.896	88.243	Projected	e0	LL	GRC	Our projection
all-cause (indirect)	Greece	Men	2040	83.0537	86.1318	88.4852	Projected	e0	LL	GRC	Our projection
all-cause (indirect)	Greece	Men	2041	83.2731	86.3685	88.6988	Projected	e0	LL	GRC	Our projection
all-cause (indirect)	Greece	Men	2042	83.492	86.5971	88.9367	Projected	e0	LL	GRC	Our projection
all-cause (indirect)	Greece	Men	2043	83.6923	86.8193	89.165	Projected	e0	LL	GRC	Our projection
all-cause (indirect)	Greece	Men	2044	83.896	87.0418	89.3834	Projected	e0	LL	GRC	Our projection
all-cause (indirect)	Greece	Men	2045	84.1013	87.263	89.5979	Projected	e0	LL	GRC	Our projection
all-cause (indirect)	Greece	Men	2046	84.3395	87.4706	89.8082	Projected	e0	LL	GRC	Our projection
all-cause (indirect)	Greece	Men	2047	84.5587	87.6841	90.0144	Projected	e0	LL	GRC	Our projection
all-cause (indirect)	Greece	Men	2048	84.777	87.8974	90.2169	Projected	e0	LL	GRC	Our projection
all-cause (indirect)	Greece	Men	2049	84.9719	88.1017	90.4255	Projected	e0	LL	GRC	Our projection
all-cause (indirect)	Greece	Men	2050	85.1663	88.3105	90.6187	Projected	e0	LL	GRC	Our projection
all-cause (indirect)	Greece	Men	2051	85.3719	88.502	90.7993	Projected	e0	LL	GRC	Our projection
all-cause (indirect)	Greece	Men	2052	85.5678	88.6983	90.9766	Projected	e0	LL	GRC	Our projection
all-cause (indirect)	Greece	Men	2053	85.7539	88.8838	91.1653	Projected	e0	LL	GRC	Our projection
all-cause (indirect)	Greece	Men	2054	85.9541	89.0734	91.3345	Projected	e0	LL	GRC	Our projection
all-cause (indirect)	Greece	Men	2055	86.1428	89.2611	91.5214	Projected	e0	LL	GRC	Our projection
all-cause (indirect)	Greece	Men	2056	86.3295	89.4457	91.6904	Projected	e0	LL	GRC	Our projection
all-cause (indirect)	Greece	Men	2057	86.528	89.6174	91.8533	Projected	e0	LL	GRC	Our projection
all-cause (indirect)	Greece	Men	2058	86.7146	89.7944	92.0184	Projected	e0	LL	GRC	Our projection
all-cause (indirect)	Greece	Men	2059	86.9216	89.97	92.1888	Projected	e0	LL	GRC	Our projection
all-cause (indirect)	Greece	Men	2060	87.0894	90.144	92.3448	Projected	e0	LL	GRC	Our projection
all-cause (indirect)	Greece	Men	2061	87.2657	90.3101	92.5045	Projected	e0	LL	GRC	Our projection
all-cause (indirect)	Greece	Men	2062	87.4299	90.4798	92.6487	Projected	e0	LL	GRC	Our projection
all-cause (indirect)	Greece	Men	2063	87.6005	90.6441	92.803	Projected	e0	LL	GRC	Our projection
all-cause (indirect)	Greece	Men	2064	87.7961	90.8076	92.952	Projected	e0	LL	GRC	Our projection
all-cause (indirect)	Greece	Men	2065	87.9494	90.9698	93.1008	Projected	e0	LL	GRC	Our projection
all-cause (direct)	Hungary	Men	1990		65.1422		Observed	e0	LC	HUN	Observed
all-cause (direct)	Hungary	Men	1991		65.104		Observed	e0	LC	HUN	Observed
all-cause (direct)	Hungary	Men	1992		64.6576		Observed	e0	LC	HUN	Observed
all-cause (direct)	Hungary	Men	1993		64.6517		Observed	e0	LC	HUN	Observed
all-cause (direct)	Hungary	Men	1994		65.0024		Observed	e0	LC	HUN	Observed
all-cause (direct)	Hungary	Men	1995		65.4146		Observed	e0	LC	HUN	Observed
all-cause (direct)	Hungary	Men	1996		66.294		Observed	e0	LC	HUN	Observed
all-cause (direct)	Hungary	Men	1997		66.6381		Observed	e0	LC	HUN	Observed
all-cause (direct)	Hungary	Men	1998		66.4298		Observed	e0	LC	HUN	Observed
all-cause (direct)	Hungary	Men	1999		66.6654		Observed	e0	LC	HUN	Observed
all-cause (direct)	Hungary	Men	2000		67.4866		Observed	e0	LC	HUN	Observed
all-cause (direct)	Hungary	Men	2001		68.1852		Observed	e0	LC	HUN	Observed
all-cause (direct)	Hungary	Men	2002		68.2843		Observed	e0	LC	HUN	Observed
all-cause (direct)	Hungary	Men	2003		68.3256		Observed	e0	LC	HUN	Observed
all-cause (direct)	Hungary	Men	2004		68.6625		Observed	e0	LC	HUN	Observed
all-cause (direct)	Hungary	Men	2005		68.6166		Observed	e0	LC	HUN	Observed
all-cause (direct)	Hungary	Men	2006		69.0802		Observed	e0	LC	HUN	Observed
all-cause (direct)	Hungary	Men	2007		69.263		Observed	e0	LC	HUN	Observed
all-cause (direct)	Hungary	Men	2008		69.8335		Observed	e0	LC	HUN	Observed
all-cause (direct)	Hungary	Men	2009		70.1207		Observed	e0	LC	HUN	Observed
all-cause (direct)	Hungary	Men	2010		70.5712		Observed	e0	LC	HUN	Observed
all-cause (direct)	Hungary	Men	2011		71.1483		Observed	e0	LC	HUN	Observed
all-cause (direct)	Hungary	Men	2012		71.5503		Observed	e0	LC	HUN	Observed
all-cause (direct)	Hungary	Men	2013		72.1236		Observed	e0	LC	HUN	Observed
all-cause (direct)	Hungary	Men	2014		72.2596		Observed	e0	LC	HUN	Observed
all-cause (direct)	Hungary	Men	2015	72.011	72.7294	73.4241	Projected	e0	LC	HUN	Lee-Carter projection
all-cause (direct)	Hungary	Men	2016	72.08	72.9565	73.7938	Projected	e0	LC	HUN	Lee-Carter projection
all-cause (direct)	Hungary	Men	2017	72.1727	73.1857	74.139	Projected	e0	LC	HUN	Lee-Carter projection
all-cause (direct)	Hungary	Men	2018	72.2897	73.4084	74.4544	Projected	e0	LC	HUN	Lee-Carter projection
all-cause (direct)	Hungary	Men	2019	72.4155	73.6293	74.7536	Projected	e0	LC	HUN	Lee-Carter projection
all-cause (direct)	Hungary	Men	2020	72.5514	73.8468	75.0441	Projected	e0	LC	HUN	Lee-Carter projection
all-cause (direct)	Hungary	Men	2021	72.6767	74.0585	75.3198	Projected	e0	LC	HUN	Lee-Carter projection
all-cause (direct)	Hungary	Men	2022	72.8232	74.2697	75.5898	Projected	e0	LC	HUN	Lee-Carter projection
all-cause (direct)	Hungary	Men	2023	72.9693	74.4778	75.855	Projected	e0	LC	HUN	Lee-Carter projection
all-cause (direct)	Hungary	Men	2024	73.1203	74.6874	76.1052	Projected	e0	LC	HUN	Lee-Carter projection
all-cause (direct)	Hungary	Men	2025	73.2778	74.8907	76.3648	Projected	e0	LC	HUN	Lee-Carter projection
all-cause (direct)	Hungary	Men	2026	73.4376	75.0888	76.6048	Projected	e0	LC	HUN	Lee-Carter projection
all-cause (direct)	Hungary	Men	2027	73.5802	75.2914	76.8506	Projected	e0	LC	HUN	Lee-Carter projection
all-cause (direct)	Hungary	Men	2028	73.7502	75.4892	77.0843	Projected	e0	LC	HUN	Lee-Carter projection
all-cause (direct)	Hungary	Men	2029	73.8939	75.6814	77.3197	Projected	e0	LC	HUN	Lee-Carter projection
all-cause (direct)	Hungary	Men	2030	74.0438	75.8731	77.5427	Projected	e0	LC	HUN	Lee-Carter projection
all-cause (direct)	Hungary	Men	2031	74.1984	76.0677	77.7526	Projected	e0	LC	HUN	Lee-Carter projection
all-cause (direct)	Hungary	Men	2032	74.3626	76.256	77.9695	Projected	e0	LC	HUN	Lee-Carter projection
all-cause (direct)	Hungary	Men	2033	74.5191	76.4458	78.1984	Projected	e0	LC	HUN	Lee-Carter projection
all-cause (direct)	Hungary	Men	2034	74.6854	76.6316	78.4088	Projected	e0	LC	HUN	Lee-Carter projection
all-cause (direct)	Hungary	Men	2035	74.8288	76.8164	78.6185	Projected	e0	LC	HUN	Lee-Carter projection
all-cause (direct)	Hungary	Men	2036	74.9917	76.9992	78.824	Projected	e0	LC	HUN	Lee-Carter projection
all-cause (direct)	Hungary	Men	2037	75.1497	77.1774	79.0342	Projected	e0	LC	HUN	Lee-Carter projection
all-cause (direct)	Hungary	Men	2038	75.31	77.3587	79.2262	Projected	e0	LC	HUN	Lee-Carter projection
all-cause (direct)	Hungary	Men	2039	75.4667	77.534	79.4287	Projected	e0	LC	HUN	Lee-Carter projection
all-cause (direct)	Hungary	Men	2040	75.614	77.715	79.6222	Projected	e0	LC	HUN	Lee-Carter projection
all-cause (direct)	Hungary	Men	2041	75.7616	77.8879	79.8247	Projected	e0	LC	HUN	Lee-Carter projection
all-cause (direct)	Hungary	Men	2042	75.9325	78.0587	80.0201	Projected	e0	LC	HUN	Lee-Carter projection
all-cause (direct)	Hungary	Men	2043	76.0819	78.2307	80.2144	Projected	e0	LC	HUN	Lee-Carter projection
all-cause (direct)	Hungary	Men	2044	76.2269	78.4029	80.3984	Projected	e0	LC	HUN	Lee-Carter projection
all-cause (direct)	Hungary	Men	2045	76.3782	78.5751	80.5799	Projected	e0	LC	HUN	Lee-Carter projection
all-cause (direct)	Hungary	Men	2046	76.5416	78.7391	80.7667	Projected	e0	LC	HUN	Lee-Carter projection
all-cause (direct)	Hungary	Men	2047	76.6873	78.9057	80.9565	Projected	e0	LC	HUN	Lee-Carter projection
all-cause (direct)	Hungary	Men	2048	76.845	79.0718	81.1358	Projected	e0	LC	HUN	Lee-Carter projection
all-cause (direct)	Hungary	Men	2049	76.9942	79.2364	81.3203	Projected	e0	LC	HUN	Lee-Carter projection
all-cause (direct)	Hungary	Men	2050	77.1271	79.4001	81.4886	Projected	e0	LC	HUN	Lee-Carter projection
all-cause (direct)	Hungary	Men	2051	77.2782	79.5644	81.666	Projected	e0	LC	HUN	Lee-Carter projection
all-cause (direct)	Hungary	Men	2052	77.4208	79.7244	81.8332	Projected	e0	LC	HUN	Lee-Carter projection
all-cause (direct)	Hungary	Men	2053	77.5848	79.8849	82.0082	Projected	e0	LC	HUN	Lee-Carter projection
all-cause (direct)	Hungary	Men	2054	77.7329	80.0371	82.1675	Projected	e0	LC	HUN	Lee-Carter projection
all-cause (direct)	Hungary	Men	2055	77.8817	80.198	82.3402	Projected	e0	LC	HUN	Lee-Carter projection
all-cause (direct)	Hungary	Men	2056	78.0299	80.3592	82.4993	Projected	e0	LC	HUN	Lee-Carter projection
all-cause (direct)	Hungary	Men	2057	78.1662	80.5156	82.67	Projected	e0	LC	HUN	Lee-Carter projection
all-cause (direct)	Hungary	Men	2058	78.3135	80.6748	82.8461	Projected	e0	LC	HUN	Lee-Carter projection
all-cause (direct)	Hungary	Men	2059	78.4662	80.8279	83.0125	Projected	e0	LC	HUN	Lee-Carter projection
all-cause (direct)	Hungary	Men	2060	78.6076	80.9847	83.1701	Projected	e0	LC	HUN	Lee-Carter projection
all-cause (direct)	Hungary	Men	2061	78.7358	81.1352	83.3374	Projected	e0	LC	HUN	Lee-Carter projection
all-cause (direct)	Hungary	Men	2062	78.8756	81.2831	83.4871	Projected	e0	LC	HUN	Lee-Carter projection
all-cause (direct)	Hungary	Men	2063	79.0189	81.4299	83.6374	Projected	e0	LC	HUN	Lee-Carter projection
all-cause (direct)	Hungary	Men	2064	79.1665	81.5835	83.793	Projected	e0	LC	HUN	Lee-Carter projection
all-cause (direct)	Hungary	Men	2065	79.3055	81.7354	83.9474	Projected	e0	LC	HUN	Lee-Carter projection
all-cause (indirect)	Hungary	Men	2015	72.1975	72.9576	73.7204	Projected	e0	LL	HUN	Our projection
all-cause (indirect)	Hungary	Men	2016	72.369	73.33	74.2793	Projected	e0	LL	HUN	Our projection
all-cause (indirect)	Hungary	Men	2017	72.638	73.7115	74.8035	Projected	e0	LL	HUN	Our projection
all-cause (indirect)	Hungary	Men	2018	72.8898	74.1009	75.3241	Projected	e0	LL	HUN	Our projection
all-cause (indirect)	Hungary	Men	2019	73.1808	74.4887	75.8337	Projected	e0	LL	HUN	Our projection
all-cause (indirect)	Hungary	Men	2020	73.4477	74.8912	76.3513	Projected	e0	LL	HUN	Our projection
all-cause (indirect)	Hungary	Men	2021	73.7592	75.2927	76.8612	Projected	e0	LL	HUN	Our projection
all-cause (indirect)	Hungary	Men	2022	74.0748	75.7052	77.3743	Projected	e0	LL	HUN	Our projection
all-cause (indirect)	Hungary	Men	2023	74.3896	76.1199	77.8747	Projected	e0	LL	HUN	Our projection
all-cause (indirect)	Hungary	Men	2024	74.7303	76.5406	78.3777	Projected	e0	LL	HUN	Our projection
all-cause (indirect)	Hungary	Men	2025	75.0559	76.9687	78.8892	Projected	e0	LL	HUN	Our projection
all-cause (indirect)	Hungary	Men	2026	75.4005	77.41	79.3699	Projected	e0	LL	HUN	Our projection
all-cause (indirect)	Hungary	Men	2027	75.7654	77.8357	79.8749	Projected	e0	LL	HUN	Our projection
all-cause (indirect)	Hungary	Men	2028	76.1215	78.2826	80.3301	Projected	e0	LL	HUN	Our projection
all-cause (indirect)	Hungary	Men	2029	76.4991	78.7088	80.8024	Projected	e0	LL	HUN	Our projection
all-cause (indirect)	Hungary	Men	2030	76.8734	79.1409	81.2321	Projected	e0	LL	HUN	Our projection
all-cause (indirect)	Hungary	Men	2031	77.2611	79.5596	81.6605	Projected	e0	LL	HUN	Our projection
all-cause (indirect)	Hungary	Men	2032	77.6172	79.9771	82.0518	Projected	e0	LL	HUN	Our projection
all-cause (indirect)	Hungary	Men	2033	78.0164	80.3849	82.4566	Projected	e0	LL	HUN	Our projection
all-cause (indirect)	Hungary	Men	2034	78.3987	80.783	82.8537	Projected	e0	LL	HUN	Our projection
all-cause (indirect)	Hungary	Men	2035	78.7863	81.1769	83.2209	Projected	e0	LL	HUN	Our projection
all-cause (indirect)	Hungary	Men	2036	79.176	81.5529	83.5746	Projected	e0	LL	HUN	Our projection
all-cause (indirect)	Hungary	Men	2037	79.5534	81.9209	83.9258	Projected	e0	LL	HUN	Our projection
all-cause (indirect)	Hungary	Men	2038	79.9333	82.2691	84.2547	Projected	e0	LL	HUN	Our projection
all-cause (indirect)	Hungary	Men	2039	80.3228	82.6141	84.5884	Projected	e0	LL	HUN	Our projection
all-cause (indirect)	Hungary	Men	2040	80.6669	82.9423	84.8882	Projected	e0	LL	HUN	Our projection
all-cause (indirect)	Hungary	Men	2041	81.0249	83.2566	85.196	Projected	e0	LL	HUN	Our projection
all-cause (indirect)	Hungary	Men	2042	81.3448	83.5656	85.4874	Projected	e0	LL	HUN	Our projection
all-cause (indirect)	Hungary	Men	2043	81.6493	83.8587	85.7623	Projected	e0	LL	HUN	Our projection
all-cause (indirect)	Hungary	Men	2044	81.9297	84.1414	86.0474	Projected	e0	LL	HUN	Our projection
all-cause (indirect)	Hungary	Men	2045	82.2111	84.4125	86.2988	Projected	e0	LL	HUN	Our projection
all-cause (indirect)	Hungary	Men	2046	82.4892	84.6725	86.555	Projected	e0	LL	HUN	Our projection
all-cause (indirect)	Hungary	Men	2047	82.742	84.92	86.7941	Projected	e0	LL	HUN	Our projection
all-cause (indirect)	Hungary	Men	2048	82.9754	85.169	87.0399	Projected	e0	LL	HUN	Our projection
all-cause (indirect)	Hungary	Men	2049	83.2216	85.4087	87.2678	Projected	e0	LL	HUN	Our projection
all-cause (indirect)	Hungary	Men	2050	83.4632	85.6389	87.506	Projected	e0	LL	HUN	Our projection
all-cause (indirect)	Hungary	Men	2051	83.6845	85.8708	87.7201	Projected	e0	LL	HUN	Our projection
all-cause (indirect)	Hungary	Men	2052	83.9163	86.0872	87.9374	Projected	e0	LL	HUN	Our projection
all-cause (indirect)	Hungary	Men	2053	84.1363	86.3037	88.1482	Projected	e0	LL	HUN	Our projection
all-cause (indirect)	Hungary	Men	2054	84.3369	86.5193	88.3548	Projected	e0	LL	HUN	Our projection
all-cause (indirect)	Hungary	Men	2055	84.5587	86.7259	88.5644	Projected	e0	LL	HUN	Our projection
all-cause (indirect)	Hungary	Men	2056	84.7483	86.9347	88.7597	Projected	e0	LL	HUN	Our projection
all-cause (indirect)	Hungary	Men	2057	84.9503	87.1351	88.9672	Projected	e0	LL	HUN	Our projection
all-cause (indirect)	Hungary	Men	2058	85.1523	87.3358	89.1519	Projected	e0	LL	HUN	Our projection
all-cause (indirect)	Hungary	Men	2059	85.3431	87.5241	89.3467	Projected	e0	LL	HUN	Our projection
all-cause (indirect)	Hungary	Men	2060	85.5423	87.7168	89.5418	Projected	e0	LL	HUN	Our projection
all-cause (indirect)	Hungary	Men	2061	85.731	87.9067	89.7194	Projected	e0	LL	HUN	Our projection
all-cause (indirect)	Hungary	Men	2062	85.9122	88.0953	89.9075	Projected	e0	LL	HUN	Our projection
all-cause (indirect)	Hungary	Men	2063	86.0929	88.2817	90.0845	Projected	e0	LL	HUN	Our projection
all-cause (indirect)	Hungary	Men	2064	86.2778	88.4632	90.2659	Projected	e0	LL	HUN	Our projection
all-cause (indirect)	Hungary	Men	2065	86.4676	88.6435	90.4461	Projected	e0	LL	HUN	Our projection
all-cause (direct)	Ireland	Men	1990		72.1216		Observed	e0	LC	IRL	Observed
all-cause (direct)	Ireland	Men	1991		72.2868		Observed	e0	LC	IRL	Observed
all-cause (direct)	Ireland	Men	1992		72.6769		Observed	e0	LC	IRL	Observed
all-cause (direct)	Ireland	Men	1993		72.5597		Observed	e0	LC	IRL	Observed
all-cause (direct)	Ireland	Men	1994		73.0576		Observed	e0	LC	IRL	Observed
all-cause (direct)	Ireland	Men	1995		72.7713		Observed	e0	LC	IRL	Observed
all-cause (direct)	Ireland	Men	1996		73.0927		Observed	e0	LC	IRL	Observed
all-cause (direct)	Ireland	Men	1997		73.3823		Observed	e0	LC	IRL	Observed
all-cause (direct)	Ireland	Men	1998		73.4038		Observed	e0	LC	IRL	Observed
all-cause (direct)	Ireland	Men	1999		73.4257		Observed	e0	LC	IRL	Observed
all-cause (direct)	Ireland	Men	2000		73.9403		Observed	e0	LC	IRL	Observed
all-cause (direct)	Ireland	Men	2001		74.4979		Observed	e0	LC	IRL	Observed
all-cause (direct)	Ireland	Men	2002		74.9724		Observed	e0	LC	IRL	Observed
all-cause (direct)	Ireland	Men	2003		75.6537		Observed	e0	LC	IRL	Observed
all-cause (direct)	Ireland	Men	2004		76.0205		Observed	e0	LC	IRL	Observed
all-cause (direct)	Ireland	Men	2005		77.0635		Observed	e0	LC	IRL	Observed
all-cause (direct)	Ireland	Men	2006		76.7887		Observed	e0	LC	IRL	Observed
all-cause (direct)	Ireland	Men	2007		77.2447		Observed	e0	LC	IRL	Observed
all-cause (direct)	Ireland	Men	2008		77.4652		Observed	e0	LC	IRL	Observed
all-cause (direct)	Ireland	Men	2009		77.6535		Observed	e0	LC	IRL	Observed
all-cause (direct)	Ireland	Men	2010		78.2569		Observed	e0	LC	IRL	Observed
all-cause (direct)	Ireland	Men	2011		78.4424		Observed	e0	LC	IRL	Observed
all-cause (direct)	Ireland	Men	2012		78.5734		Observed	e0	LC	IRL	Observed
all-cause (direct)	Ireland	Men	2013		78.6904		Observed	e0	LC	IRL	Observed
all-cause (direct)	Ireland	Men	2014		79.1545		Observed	e0	LC	IRL	Observed
all-cause (direct)	Ireland	Men	2015	78.8815	79.6326	80.3493	Projected	e0	LC	IRL	Lee-Carter projection
all-cause (direct)	Ireland	Men	2016	78.9801	79.8925	80.76	Projected	e0	LC	IRL	Lee-Carter projection
all-cause (direct)	Ireland	Men	2017	79.1102	80.1479	81.1423	Projected	e0	LC	IRL	Lee-Carter projection
all-cause (direct)	Ireland	Men	2018	79.2553	80.403	81.4989	Projected	e0	LC	IRL	Lee-Carter projection
all-cause (direct)	Ireland	Men	2019	79.4004	80.6505	81.8459	Projected	e0	LC	IRL	Lee-Carter projection
all-cause (direct)	Ireland	Men	2020	79.5662	80.9025	82.1766	Projected	e0	LC	IRL	Lee-Carter projection
all-cause (direct)	Ireland	Men	2021	79.7329	81.1508	82.4869	Projected	e0	LC	IRL	Lee-Carter projection
all-cause (direct)	Ireland	Men	2022	79.8979	81.394	82.7944	Projected	e0	LC	IRL	Lee-Carter projection
all-cause (direct)	Ireland	Men	2023	80.0648	81.633	83.0951	Projected	e0	LC	IRL	Lee-Carter projection
all-cause (direct)	Ireland	Men	2024	80.2371	81.8707	83.3946	Projected	e0	LC	IRL	Lee-Carter projection
all-cause (direct)	Ireland	Men	2025	80.4258	82.1086	83.679	Projected	e0	LC	IRL	Lee-Carter projection
all-cause (direct)	Ireland	Men	2026	80.6052	82.3456	83.9534	Projected	e0	LC	IRL	Lee-Carter projection
all-cause (direct)	Ireland	Men	2027	80.7762	82.5819	84.2317	Projected	e0	LC	IRL	Lee-Carter projection
all-cause (direct)	Ireland	Men	2028	80.9691	82.8067	84.5002	Projected	e0	LC	IRL	Lee-Carter projection
all-cause (direct)	Ireland	Men	2029	81.1557	83.0365	84.7587	Projected	e0	LC	IRL	Lee-Carter projection
all-cause (direct)	Ireland	Men	2030	81.3364	83.2622	85.0155	Projected	e0	LC	IRL	Lee-Carter projection
all-cause (direct)	Ireland	Men	2031	81.5296	83.4821	85.2597	Projected	e0	LC	IRL	Lee-Carter projection
all-cause (direct)	Ireland	Men	2032	81.711	83.7035	85.5176	Projected	e0	LC	IRL	Lee-Carter projection
all-cause (direct)	Ireland	Men	2033	81.8877	83.922	85.7508	Projected	e0	LC	IRL	Lee-Carter projection
all-cause (direct)	Ireland	Men	2034	82.0832	84.1366	85.9862	Projected	e0	LC	IRL	Lee-Carter projection
all-cause (direct)	Ireland	Men	2035	82.2598	84.3438	86.2172	Projected	e0	LC	IRL	Lee-Carter projection
all-cause (direct)	Ireland	Men	2036	82.452	84.5553	86.4472	Projected	e0	LC	IRL	Lee-Carter projection
all-cause (direct)	Ireland	Men	2037	82.6159	84.7624	86.664	Projected	e0	LC	IRL	Lee-Carter projection
all-cause (direct)	Ireland	Men	2038	82.7947	84.9688	86.8801	Projected	e0	LC	IRL	Lee-Carter projection
all-cause (direct)	Ireland	Men	2039	82.9797	85.1663	87.0925	Projected	e0	LC	IRL	Lee-Carter projection
all-cause (direct)	Ireland	Men	2040	83.1506	85.3624	87.3006	Projected	e0	LC	IRL	Lee-Carter projection
all-cause (direct)	Ireland	Men	2041	83.3374	85.5588	87.5001	Projected	e0	LC	IRL	Lee-Carter projection
all-cause (direct)	Ireland	Men	2042	83.516	85.7574	87.7037	Projected	e0	LC	IRL	Lee-Carter projection
all-cause (direct)	Ireland	Men	2043	83.7182	85.9416	87.8986	Projected	e0	LC	IRL	Lee-Carter projection
all-cause (direct)	Ireland	Men	2044	83.8873	86.132	88.09	Projected	e0	LC	IRL	Lee-Carter projection
all-cause (direct)	Ireland	Men	2045	84.0489	86.3156	88.2817	Projected	e0	LC	IRL	Lee-Carter projection
all-cause (direct)	Ireland	Men	2046	84.2164	86.5038	88.475	Projected	e0	LC	IRL	Lee-Carter projection
all-cause (direct)	Ireland	Men	2047	84.3895	86.6854	88.6544	Projected	e0	LC	IRL	Lee-Carter projection
all-cause (direct)	Ireland	Men	2048	84.5702	86.8702	88.8415	Projected	e0	LC	IRL	Lee-Carter projection
all-cause (direct)	Ireland	Men	2049	84.7535	87.0451	89.0086	Projected	e0	LC	IRL	Lee-Carter projection
all-cause (direct)	Ireland	Men	2050	84.9397	87.2204	89.1896	Projected	e0	LC	IRL	Lee-Carter projection
all-cause (direct)	Ireland	Men	2051	85.1022	87.3891	89.3618	Projected	e0	LC	IRL	Lee-Carter projection
all-cause (direct)	Ireland	Men	2052	85.2696	87.564	89.5305	Projected	e0	LC	IRL	Lee-Carter projection
all-cause (direct)	Ireland	Men	2053	85.4473	87.7363	89.6951	Projected	e0	LC	IRL	Lee-Carter projection
all-cause (direct)	Ireland	Men	2054	85.6118	87.9038	89.8479	Projected	e0	LC	IRL	Lee-Carter projection
all-cause (direct)	Ireland	Men	2055	85.7741	88.0667	90.0119	Projected	e0	LC	IRL	Lee-Carter projection
all-cause (direct)	Ireland	Men	2056	85.9571	88.2302	90.1604	Projected	e0	LC	IRL	Lee-Carter projection
all-cause (direct)	Ireland	Men	2057	86.1188	88.3886	90.3107	Projected	e0	LC	IRL	Lee-Carter projection
all-cause (direct)	Ireland	Men	2058	86.2633	88.5448	90.4704	Projected	e0	LC	IRL	Lee-Carter projection
all-cause (direct)	Ireland	Men	2059	86.4199	88.6962	90.608	Projected	e0	LC	IRL	Lee-Carter projection
all-cause (direct)	Ireland	Men	2060	86.5706	88.8524	90.755	Projected	e0	LC	IRL	Lee-Carter projection
all-cause (direct)	Ireland	Men	2061	86.7237	89.0045	90.8985	Projected	e0	LC	IRL	Lee-Carter projection
all-cause (direct)	Ireland	Men	2062	86.878	89.1545	91.0362	Projected	e0	LC	IRL	Lee-Carter projection
all-cause (direct)	Ireland	Men	2063	87.0259	89.3008	91.1697	Projected	e0	LC	IRL	Lee-Carter projection
all-cause (direct)	Ireland	Men	2064	87.1879	89.4463	91.3048	Projected	e0	LC	IRL	Lee-Carter projection
all-cause (direct)	Ireland	Men	2065	87.3235	89.5889	91.4448	Projected	e0	LC	IRL	Lee-Carter projection
all-cause (indirect)	Ireland	Men	2015	79.4171	80.2684	81.0651	Projected	e0	LL	IRL	Our projection
all-cause (indirect)	Ireland	Men	2016	79.4764	80.5688	81.552	Projected	e0	LL	IRL	Our projection
all-cause (indirect)	Ireland	Men	2017	79.6133	80.8741	81.9615	Projected	e0	LL	IRL	Our projection
all-cause (indirect)	Ireland	Men	2018	79.7696	81.1759	82.3642	Projected	e0	LL	IRL	Our projection
all-cause (indirect)	Ireland	Men	2019	79.9429	81.473	82.7512	Projected	e0	LL	IRL	Our projection
all-cause (indirect)	Ireland	Men	2020	80.135	81.7664	83.0996	Projected	e0	LL	IRL	Our projection
all-cause (indirect)	Ireland	Men	2021	80.3327	82.0497	83.4495	Projected	e0	LL	IRL	Our projection
all-cause (indirect)	Ireland	Men	2022	80.5426	82.3288	83.7781	Projected	e0	LL	IRL	Our projection
all-cause (indirect)	Ireland	Men	2023	80.7343	82.5955	84.0999	Projected	e0	LL	IRL	Our projection
all-cause (indirect)	Ireland	Men	2024	80.927	82.8637	84.4132	Projected	e0	LL	IRL	Our projection
all-cause (indirect)	Ireland	Men	2025	81.1279	83.1278	84.7134	Projected	e0	LL	IRL	Our projection
all-cause (indirect)	Ireland	Men	2026	81.3445	83.3809	85.0006	Projected	e0	LL	IRL	Our projection
all-cause (indirect)	Ireland	Men	2027	81.5409	83.6351	85.2889	Projected	e0	LL	IRL	Our projection
all-cause (indirect)	Ireland	Men	2028	81.7427	83.8788	85.5614	Projected	e0	LL	IRL	Our projection
all-cause (indirect)	Ireland	Men	2029	81.938	84.1221	85.824	Projected	e0	LL	IRL	Our projection
all-cause (indirect)	Ireland	Men	2030	82.146	84.3489	86.0883	Projected	e0	LL	IRL	Our projection
all-cause (indirect)	Ireland	Men	2031	82.3417	84.5824	86.3386	Projected	e0	LL	IRL	Our projection
all-cause (indirect)	Ireland	Men	2032	82.5339	84.8112	86.5791	Projected	e0	LL	IRL	Our projection
all-cause (indirect)	Ireland	Men	2033	82.7339	85.0332	86.8296	Projected	e0	LL	IRL	Our projection
all-cause (indirect)	Ireland	Men	2034	82.9077	85.2521	87.0647	Projected	e0	LL	IRL	Our projection
all-cause (indirect)	Ireland	Men	2035	83.105	85.4684	87.2928	Projected	e0	LL	IRL	Our projection
all-cause (indirect)	Ireland	Men	2036	83.2967	85.6889	87.5295	Projected	e0	LL	IRL	Our projection
all-cause (indirect)	Ireland	Men	2037	83.4923	85.8912	87.7416	Projected	e0	LL	IRL	Our projection
all-cause (indirect)	Ireland	Men	2038	83.6942	86.1007	87.9627	Projected	e0	LL	IRL	Our projection
all-cause (indirect)	Ireland	Men	2039	83.8872	86.3086	88.1787	Projected	e0	LL	IRL	Our projection
all-cause (indirect)	Ireland	Men	2040	84.0825	86.5095	88.3937	Projected	e0	LL	IRL	Our projection
all-cause (indirect)	Ireland	Men	2041	84.2616	86.7146	88.6052	Projected	e0	LL	IRL	Our projection
all-cause (indirect)	Ireland	Men	2042	84.4616	86.9175	88.8023	Projected	e0	LL	IRL	Our projection
all-cause (indirect)	Ireland	Men	2043	84.6511	87.1104	89.0006	Projected	e0	LL	IRL	Our projection
all-cause (indirect)	Ireland	Men	2044	84.8487	87.3124	89.2084	Projected	e0	LL	IRL	Our projection
all-cause (indirect)	Ireland	Men	2045	85.0189	87.4999	89.4087	Projected	e0	LL	IRL	Our projection
all-cause (indirect)	Ireland	Men	2046	85.2037	87.6991	89.591	Projected	e0	LL	IRL	Our projection
all-cause (indirect)	Ireland	Men	2047	85.3986	87.8818	89.7873	Projected	e0	LL	IRL	Our projection
all-cause (indirect)	Ireland	Men	2048	85.5573	88.0707	89.9742	Projected	e0	LL	IRL	Our projection
all-cause (indirect)	Ireland	Men	2049	85.7486	88.256	90.1689	Projected	e0	LL	IRL	Our projection
all-cause (indirect)	Ireland	Men	2050	85.9514	88.4421	90.3523	Projected	e0	LL	IRL	Our projection
all-cause (indirect)	Ireland	Men	2051	86.1307	88.6229	90.5293	Projected	e0	LL	IRL	Our projection
all-cause (indirect)	Ireland	Men	2052	86.313	88.8042	90.7046	Projected	e0	LL	IRL	Our projection
all-cause (indirect)	Ireland	Men	2053	86.4756	88.9887	90.8784	Projected	e0	LL	IRL	Our projection
all-cause (indirect)	Ireland	Men	2054	86.6548	89.1677	91.0496	Projected	e0	LL	IRL	Our projection
all-cause (indirect)	Ireland	Men	2055	86.8377	89.341	91.2204	Projected	e0	LL	IRL	Our projection
all-cause (indirect)	Ireland	Men	2056	86.993	89.5133	91.3744	Projected	e0	LL	IRL	Our projection
all-cause (indirect)	Ireland	Men	2057	87.1483	89.6854	91.5401	Projected	e0	LL	IRL	Our projection
all-cause (indirect)	Ireland	Men	2058	87.3169	89.8473	91.6958	Projected	e0	LL	IRL	Our projection
all-cause (indirect)	Ireland	Men	2059	87.4866	90.0091	91.8659	Projected	e0	LL	IRL	Our projection
all-cause (indirect)	Ireland	Men	2060	87.6588	90.1749	92.0037	Projected	e0	LL	IRL	Our projection
all-cause (indirect)	Ireland	Men	2061	87.811	90.3324	92.1679	Projected	e0	LL	IRL	Our projection
all-cause (indirect)	Ireland	Men	2062	87.9878	90.4916	92.312	Projected	e0	LL	IRL	Our projection
all-cause (indirect)	Ireland	Men	2063	88.1393	90.6444	92.457	Projected	e0	LL	IRL	Our projection
all-cause (indirect)	Ireland	Men	2064	88.3121	90.7944	92.6035	Projected	e0	LL	IRL	Our projection
all-cause (indirect)	Ireland	Men	2065	88.4585	90.9464	92.7428	Projected	e0	LL	IRL	Our projection
all-cause (direct)	Italy	Men	1990		73.6307		Observed	e0	LC	ITA	Observed
all-cause (direct)	Italy	Men	1991		73.5901		Observed	e0	LC	ITA	Observed
all-cause (direct)	Italy	Men	1992		73.9758		Observed	e0	LC	ITA	Observed
all-cause (direct)	Italy	Men	1993		74.3611		Observed	e0	LC	ITA	Observed
all-cause (direct)	Italy	Men	1994		74.5634		Observed	e0	LC	ITA	Observed
all-cause (direct)	Italy	Men	1995		74.779		Observed	e0	LC	ITA	Observed
all-cause (direct)	Italy	Men	1996		75.1847		Observed	e0	LC	ITA	Observed
all-cause (direct)	Italy	Men	1997		75.5352		Observed	e0	LC	ITA	Observed
all-cause (direct)	Italy	Men	1998		75.6387		Observed	e0	LC	ITA	Observed
all-cause (direct)	Italy	Men	1999		76.0578		Observed	e0	LC	ITA	Observed
all-cause (direct)	Italy	Men	2000		76.5319		Observed	e0	LC	ITA	Observed
all-cause (direct)	Italy	Men	2001		76.7941		Observed	e0	LC	ITA	Observed
all-cause (direct)	Italy	Men	2002		77.0766		Observed	e0	LC	ITA	Observed
all-cause (direct)	Italy	Men	2003		77.3181		Observed	e0	LC	ITA	Observed
all-cause (direct)	Italy	Men	2004		78.0606		Observed	e0	LC	ITA	Observed
all-cause (direct)	Italy	Men	2005		78.1662		Observed	e0	LC	ITA	Observed
all-cause (direct)	Italy	Men	2006		78.576		Observed	e0	LC	ITA	Observed
all-cause (direct)	Italy	Men	2007		78.7651		Observed	e0	LC	ITA	Observed
all-cause (direct)	Italy	Men	2008		78.9724		Observed	e0	LC	ITA	Observed
all-cause (direct)	Italy	Men	2009		79.164		Observed	e0	LC	ITA	Observed
all-cause (direct)	Italy	Men	2010		79.5579		Observed	e0	LC	ITA	Observed
all-cause (direct)	Italy	Men	2011		79.7258		Observed	e0	LC	ITA	Observed
all-cause (direct)	Italy	Men	2012		79.8364		Observed	e0	LC	ITA	Observed
all-cause (direct)	Italy	Men	2013		80.2506		Observed	e0	LC	ITA	Observed
all-cause (direct)	Italy	Men	2014		80.5518		Observed	e0	LC	ITA	Observed
all-cause (direct)	Italy	Men	2015	80.6256	81.0427	81.4448	Projected	e0	LC	ITA	Lee-Carter projection
all-cause (direct)	Italy	Men	2016	80.7648	81.2736	81.7625	Projected	e0	LC	ITA	Lee-Carter projection
all-cause (direct)	Italy	Men	2017	80.9224	81.4999	82.0537	Projected	e0	LC	ITA	Lee-Carter projection
all-cause (direct)	Italy	Men	2018	81.0871	81.7249	82.3342	Projected	e0	LC	ITA	Lee-Carter projection
all-cause (direct)	Italy	Men	2019	81.2524	81.9476	82.6035	Projected	e0	LC	ITA	Lee-Carter projection
all-cause (direct)	Italy	Men	2020	81.4268	82.1654	82.8593	Projected	e0	LC	ITA	Lee-Carter projection
all-cause (direct)	Italy	Men	2021	81.6007	82.381	83.1067	Projected	e0	LC	ITA	Lee-Carter projection
all-cause (direct)	Italy	Men	2022	81.7823	82.5898	83.3529	Projected	e0	LC	ITA	Lee-Carter projection
all-cause (direct)	Italy	Men	2023	81.9609	82.7996	83.5894	Projected	e0	LC	ITA	Lee-Carter projection
all-cause (direct)	Italy	Men	2024	82.131	83.0027	83.8206	Projected	e0	LC	ITA	Lee-Carter projection
all-cause (direct)	Italy	Men	2025	82.311	83.2071	84.0384	Projected	e0	LC	ITA	Lee-Carter projection
all-cause (direct)	Italy	Men	2026	82.4868	83.4044	84.2569	Projected	e0	LC	ITA	Lee-Carter projection
all-cause (direct)	Italy	Men	2027	82.6592	83.599	84.4725	Projected	e0	LC	ITA	Lee-Carter projection
all-cause (direct)	Italy	Men	2028	82.8292	83.7913	84.6812	Projected	e0	LC	ITA	Lee-Carter projection
all-cause (direct)	Italy	Men	2029	82.997	83.9835	84.8905	Projected	e0	LC	ITA	Lee-Carter projection
all-cause (direct)	Italy	Men	2030	83.1671	84.1672	85.088	Projected	e0	LC	ITA	Lee-Carter projection
all-cause (direct)	Italy	Men	2031	83.334	84.3499	85.2888	Projected	e0	LC	ITA	Lee-Carter projection
all-cause (direct)	Italy	Men	2032	83.4938	84.5337	85.4761	Projected	e0	LC	ITA	Lee-Carter projection
all-cause (direct)	Italy	Men	2033	83.668	84.7138	85.6648	Projected	e0	LC	ITA	Lee-Carter projection
all-cause (direct)	Italy	Men	2034	83.8361	84.8902	85.8446	Projected	e0	LC	ITA	Lee-Carter projection
all-cause (direct)	Italy	Men	2035	84.0054	85.0637	86.0305	Projected	e0	LC	ITA	Lee-Carter projection
all-cause (direct)	Italy	Men	2036	84.1648	85.236	86.2036	Projected	e0	LC	ITA	Lee-Carter projection
all-cause (direct)	Italy	Men	2037	84.324	85.4007	86.3767	Projected	e0	LC	ITA	Lee-Carter projection
all-cause (direct)	Italy	Men	2038	84.4891	85.5672	86.5448	Projected	e0	LC	ITA	Lee-Carter projection
all-cause (direct)	Italy	Men	2039	84.64	85.7306	86.7198	Projected	e0	LC	ITA	Lee-Carter projection
all-cause (direct)	Italy	Men	2040	84.7966	85.8945	86.8859	Projected	e0	LC	ITA	Lee-Carter projection
all-cause (direct)	Italy	Men	2041	84.9544	86.0541	87.0406	Projected	e0	LC	ITA	Lee-Carter projection
all-cause (direct)	Italy	Men	2042	85.1085	86.2079	87.2087	Projected	e0	LC	ITA	Lee-Carter projection
all-cause (direct)	Italy	Men	2043	85.2651	86.3621	87.3607	Projected	e0	LC	ITA	Lee-Carter projection
all-cause (direct)	Italy	Men	2044	85.4106	86.5153	87.5164	Projected	e0	LC	ITA	Lee-Carter projection
all-cause (direct)	Italy	Men	2045	85.5598	86.663	87.6585	Projected	e0	LC	ITA	Lee-Carter projection
all-cause (direct)	Italy	Men	2046	85.6977	86.8147	87.8074	Projected	e0	LC	ITA	Lee-Carter projection
all-cause (direct)	Italy	Men	2047	85.844	86.9571	87.9573	Projected	e0	LC	ITA	Lee-Carter projection
all-cause (direct)	Italy	Men	2048	85.9991	87.1018	88.0952	Projected	e0	LC	ITA	Lee-Carter projection
all-cause (direct)	Italy	Men	2049	86.1429	87.2428	88.2361	Projected	e0	LC	ITA	Lee-Carter projection
all-cause (direct)	Italy	Men	2050	86.2786	87.3836	88.3791	Projected	e0	LC	ITA	Lee-Carter projection
all-cause (direct)	Italy	Men	2051	86.4201	87.5218	88.511	Projected	e0	LC	ITA	Lee-Carter projection
all-cause (direct)	Italy	Men	2052	86.551	87.6564	88.6418	Projected	e0	LC	ITA	Lee-Carter projection
all-cause (direct)	Italy	Men	2053	86.6862	87.7904	88.7703	Projected	e0	LC	ITA	Lee-Carter projection
all-cause (direct)	Italy	Men	2054	86.8181	87.9216	88.9005	Projected	e0	LC	ITA	Lee-Carter projection
all-cause (direct)	Italy	Men	2055	86.9467	88.0532	89.0276	Projected	e0	LC	ITA	Lee-Carter projection
all-cause (direct)	Italy	Men	2056	87.0798	88.1809	89.1571	Projected	e0	LC	ITA	Lee-Carter projection
all-cause (direct)	Italy	Men	2057	87.2065	88.308	89.2802	Projected	e0	LC	ITA	Lee-Carter projection
all-cause (direct)	Italy	Men	2058	87.3272	88.4329	89.4036	Projected	e0	LC	ITA	Lee-Carter projection
all-cause (direct)	Italy	Men	2059	87.4513	88.5538	89.5173	Projected	e0	LC	ITA	Lee-Carter projection
all-cause (direct)	Italy	Men	2060	87.5779	88.6769	89.636	Projected	e0	LC	ITA	Lee-Carter projection
all-cause (direct)	Italy	Men	2061	87.6976	88.7959	89.7527	Projected	e0	LC	ITA	Lee-Carter projection
all-cause (direct)	Italy	Men	2062	87.8231	88.9122	89.8701	Projected	e0	LC	ITA	Lee-Carter projection
all-cause (direct)	Italy	Men	2063	87.9482	89.029	89.9836	Projected	e0	LC	ITA	Lee-Carter projection
all-cause (direct)	Italy	Men	2064	88.0637	89.1446	90.0956	Projected	e0	LC	ITA	Lee-Carter projection
all-cause (direct)	Italy	Men	2065	88.1858	89.2547	90.2055	Projected	e0	LC	ITA	Lee-Carter projection
all-cause (indirect)	Italy	Men	2015	80.6865	81.2621	81.8225	Projected	e0	LL	ITA	Our projection
all-cause (indirect)	Italy	Men	2016	80.8679	81.5659	82.2443	Projected	e0	LL	ITA	Our projection
all-cause (indirect)	Italy	Men	2017	81.1069	81.8748	82.6218	Projected	e0	LL	ITA	Our projection
all-cause (indirect)	Italy	Men	2018	81.3264	82.1729	82.9741	Projected	e0	LL	ITA	Our projection
all-cause (indirect)	Italy	Men	2019	81.5714	82.4653	83.331	Projected	e0	LL	ITA	Our projection
all-cause (indirect)	Italy	Men	2020	81.8058	82.7523	83.6595	Projected	e0	LL	ITA	Our projection
all-cause (indirect)	Italy	Men	2021	82.0469	83.0327	83.976	Projected	e0	LL	ITA	Our projection
all-cause (indirect)	Italy	Men	2022	82.2814	83.3036	84.2846	Projected	e0	LL	ITA	Our projection
all-cause (indirect)	Italy	Men	2023	82.5051	83.5698	84.5816	Projected	e0	LL	ITA	Our projection
all-cause (indirect)	Italy	Men	2024	82.7229	83.8212	84.8694	Projected	e0	LL	ITA	Our projection
all-cause (indirect)	Italy	Men	2025	82.941	84.0684	85.1466	Projected	e0	LL	ITA	Our projection
all-cause (indirect)	Italy	Men	2026	83.1611	84.3165	85.4152	Projected	e0	LL	ITA	Our projection
all-cause (indirect)	Italy	Men	2027	83.3752	84.5592	85.6735	Projected	e0	LL	ITA	Our projection
all-cause (indirect)	Italy	Men	2028	83.5855	84.7943	85.9335	Projected	e0	LL	ITA	Our projection
all-cause (indirect)	Italy	Men	2029	83.7944	85.02	86.1819	Projected	e0	LL	ITA	Our projection
all-cause (indirect)	Italy	Men	2030	83.9894	85.2492	86.4309	Projected	e0	LL	ITA	Our projection
all-cause (indirect)	Italy	Men	2031	84.2054	85.4655	86.6589	Projected	e0	LL	ITA	Our projection
all-cause (indirect)	Italy	Men	2032	84.4027	85.6864	86.8865	Projected	e0	LL	ITA	Our projection
all-cause (indirect)	Italy	Men	2033	84.6023	85.8978	87.1193	Projected	e0	LL	ITA	Our projection
all-cause (indirect)	Italy	Men	2034	84.8005	86.1071	87.3333	Projected	e0	LL	ITA	Our projection
all-cause (indirect)	Italy	Men	2035	85.0031	86.3142	87.5598	Projected	e0	LL	ITA	Our projection
all-cause (indirect)	Italy	Men	2036	85.197	86.5219	87.7708	Projected	e0	LL	ITA	Our projection
all-cause (indirect)	Italy	Men	2037	85.3679	86.7233	87.9826	Projected	e0	LL	ITA	Our projection
all-cause (indirect)	Italy	Men	2038	85.567	86.9165	88.1804	Projected	e0	LL	ITA	Our projection
all-cause (indirect)	Italy	Men	2039	85.7465	87.1146	88.389	Projected	e0	LL	ITA	Our projection
all-cause (indirect)	Italy	Men	2040	85.9298	87.3073	88.5919	Projected	e0	LL	ITA	Our projection
all-cause (indirect)	Italy	Men	2041	86.1055	87.5	88.7858	Projected	e0	LL	ITA	Our projection
all-cause (indirect)	Italy	Men	2042	86.281	87.6854	88.9768	Projected	e0	LL	ITA	Our projection
all-cause (indirect)	Italy	Men	2043	86.4605	87.8716	89.1702	Projected	e0	LL	ITA	Our projection
all-cause (indirect)	Italy	Men	2044	86.6311	88.0555	89.3547	Projected	e0	LL	ITA	Our projection
all-cause (indirect)	Italy	Men	2045	86.8018	88.2366	89.5381	Projected	e0	LL	ITA	Our projection
all-cause (indirect)	Italy	Men	2046	86.9859	88.4182	89.7198	Projected	e0	LL	ITA	Our projection
all-cause (indirect)	Italy	Men	2047	87.1566	88.5926	89.9052	Projected	e0	LL	ITA	Our projection
all-cause (indirect)	Italy	Men	2048	87.3322	88.765	90.0763	Projected	e0	LL	ITA	Our projection
all-cause (indirect)	Italy	Men	2049	87.4895	88.9413	90.2595	Projected	e0	LL	ITA	Our projection
all-cause (indirect)	Italy	Men	2050	87.6646	89.1109	90.4217	Projected	e0	LL	ITA	Our projection
all-cause (indirect)	Italy	Men	2051	87.818	89.2807	90.5941	Projected	e0	LL	ITA	Our projection
all-cause (indirect)	Italy	Men	2052	87.9866	89.4483	90.7535	Projected	e0	LL	ITA	Our projection
all-cause (indirect)	Italy	Men	2053	88.1425	89.6126	90.9316	Projected	e0	LL	ITA	Our projection
all-cause (indirect)	Italy	Men	2054	88.3101	89.7754	91.0881	Projected	e0	LL	ITA	Our projection
all-cause (indirect)	Italy	Men	2055	88.4744	89.9388	91.2539	Projected	e0	LL	ITA	Our projection
all-cause (indirect)	Italy	Men	2056	88.6349	90.0965	91.4054	Projected	e0	LL	ITA	Our projection
all-cause (indirect)	Italy	Men	2057	88.785	90.251	91.5575	Projected	e0	LL	ITA	Our projection
all-cause (indirect)	Italy	Men	2058	88.9502	90.4075	91.7135	Projected	e0	LL	ITA	Our projection
all-cause (indirect)	Italy	Men	2059	89.0901	90.5598	91.8678	Projected	e0	LL	ITA	Our projection
all-cause (indirect)	Italy	Men	2060	89.249	90.708	92.0147	Projected	e0	LL	ITA	Our projection
all-cause (indirect)	Italy	Men	2061	89.4026	90.8586	92.1532	Projected	e0	LL	ITA	Our projection
all-cause (indirect)	Italy	Men	2062	89.5478	91.0028	92.296	Projected	e0	LL	ITA	Our projection
all-cause (indirect)	Italy	Men	2063	89.7013	91.151	92.4321	Projected	e0	LL	ITA	Our projection
all-cause (indirect)	Italy	Men	2064	89.8423	91.2887	92.5743	Projected	e0	LL	ITA	Our projection
all-cause (indirect)	Italy	Men	2065	89.9888	91.4297	92.7055	Projected	e0	LL	ITA	Our projection
all-cause (direct)	Netherlands	Men	1990		73.8192		Observed	e0	LC	NLD	Observed
all-cause (direct)	Netherlands	Men	1991		74.0425		Observed	e0	LC	NLD	Observed
all-cause (direct)	Netherlands	Men	1992		74.3007		Observed	e0	LC	NLD	Observed
all-cause (direct)	Netherlands	Men	1993		73.9826		Observed	e0	LC	NLD	Observed
all-cause (direct)	Netherlands	Men	1994		74.5758		Observed	e0	LC	NLD	Observed
all-cause (direct)	Netherlands	Men	1995		74.5963		Observed	e0	LC	NLD	Observed
all-cause (direct)	Netherlands	Men	1996		74.649		Observed	e0	LC	NLD	Observed
all-cause (direct)	Netherlands	Men	1997		75.1575		Observed	e0	LC	NLD	Observed
all-cause (direct)	Netherlands	Men	1998		75.1767		Observed	e0	LC	NLD	Observed
all-cause (direct)	Netherlands	Men	1999		75.3287		Observed	e0	LC	NLD	Observed
all-cause (direct)	Netherlands	Men	2000		75.5307		Observed	e0	LC	NLD	Observed
all-cause (direct)	Netherlands	Men	2001		75.8017		Observed	e0	LC	NLD	Observed
all-cause (direct)	Netherlands	Men	2002		75.9877		Observed	e0	LC	NLD	Observed
all-cause (direct)	Netherlands	Men	2003		76.2396		Observed	e0	LC	NLD	Observed
all-cause (direct)	Netherlands	Men	2004		76.8678		Observed	e0	LC	NLD	Observed
all-cause (direct)	Netherlands	Men	2005		77.1963		Observed	e0	LC	NLD	Observed
all-cause (direct)	Netherlands	Men	2006		77.6283		Observed	e0	LC	NLD	Observed
all-cause (direct)	Netherlands	Men	2007		78.0132		Observed	e0	LC	NLD	Observed
all-cause (direct)	Netherlands	Men	2008		78.3142		Observed	e0	LC	NLD	Observed
all-cause (direct)	Netherlands	Men	2009		78.5328		Observed	e0	LC	NLD	Observed
all-cause (direct)	Netherlands	Men	2010		78.7775		Observed	e0	LC	NLD	Observed
all-cause (direct)	Netherlands	Men	2011		79.1939		Observed	e0	LC	NLD	Observed
all-cause (direct)	Netherlands	Men	2012		79.1457		Observed	e0	LC	NLD	Observed
all-cause (direct)	Netherlands	Men	2013		79.4168		Observed	e0	LC	NLD	Observed
all-cause (direct)	Netherlands	Men	2014		79.8725		Observed	e0	LC	NLD	Observed
all-cause (direct)	Netherlands	Men	2015	79.8412	80.3708	80.883	Projected	e0	LC	NLD	Lee-Carter projection
all-cause (direct)	Netherlands	Men	2016	79.946	80.5899	81.2136	Projected	e0	LC	NLD	Lee-Carter projection
all-cause (direct)	Netherlands	Men	2017	80.0621	80.8076	81.5187	Projected	e0	LC	NLD	Lee-Carter projection
all-cause (direct)	Netherlands	Men	2018	80.1965	81.0205	81.8048	Projected	e0	LC	NLD	Lee-Carter projection
all-cause (direct)	Netherlands	Men	2019	80.3398	81.231	82.0744	Projected	e0	LC	NLD	Lee-Carter projection
all-cause (direct)	Netherlands	Men	2020	80.493	81.44	82.34	Projected	e0	LC	NLD	Lee-Carter projection
all-cause (direct)	Netherlands	Men	2021	80.6379	81.6472	82.5996	Projected	e0	LC	NLD	Lee-Carter projection
all-cause (direct)	Netherlands	Men	2022	80.7978	81.8503	82.85	Projected	e0	LC	NLD	Lee-Carter projection
all-cause (direct)	Netherlands	Men	2023	80.9432	82.0556	83.0942	Projected	e0	LC	NLD	Lee-Carter projection
all-cause (direct)	Netherlands	Men	2024	81.1037	82.2544	83.3342	Projected	e0	LC	NLD	Lee-Carter projection
all-cause (direct)	Netherlands	Men	2025	81.2626	82.4519	83.5622	Projected	e0	LC	NLD	Lee-Carter projection
all-cause (direct)	Netherlands	Men	2026	81.4325	82.6485	83.7939	Projected	e0	LC	NLD	Lee-Carter projection
all-cause (direct)	Netherlands	Men	2027	81.5867	82.8418	84.0177	Projected	e0	LC	NLD	Lee-Carter projection
all-cause (direct)	Netherlands	Men	2028	81.7428	83.0308	84.2423	Projected	e0	LC	NLD	Lee-Carter projection
all-cause (direct)	Netherlands	Men	2029	81.9104	83.225	84.4468	Projected	e0	LC	NLD	Lee-Carter projection
all-cause (direct)	Netherlands	Men	2030	82.0683	83.4101	84.6558	Projected	e0	LC	NLD	Lee-Carter projection
all-cause (direct)	Netherlands	Men	2031	82.2281	83.5907	84.86	Projected	e0	LC	NLD	Lee-Carter projection
all-cause (direct)	Netherlands	Men	2032	82.3867	83.7752	85.0517	Projected	e0	LC	NLD	Lee-Carter projection
all-cause (direct)	Netherlands	Men	2033	82.5451	83.9587	85.2547	Projected	e0	LC	NLD	Lee-Carter projection
all-cause (direct)	Netherlands	Men	2034	82.704	84.1359	85.455	Projected	e0	LC	NLD	Lee-Carter projection
all-cause (direct)	Netherlands	Men	2035	82.865	84.3131	85.6464	Projected	e0	LC	NLD	Lee-Carter projection
all-cause (direct)	Netherlands	Men	2036	83.0089	84.4868	85.8275	Projected	e0	LC	NLD	Lee-Carter projection
all-cause (direct)	Netherlands	Men	2037	83.167	84.6561	86.0072	Projected	e0	LC	NLD	Lee-Carter projection
all-cause (direct)	Netherlands	Men	2038	83.3413	84.8281	86.1823	Projected	e0	LC	NLD	Lee-Carter projection
all-cause (direct)	Netherlands	Men	2039	83.4904	84.9977	86.3553	Projected	e0	LC	NLD	Lee-Carter projection
all-cause (direct)	Netherlands	Men	2040	83.6359	85.1668	86.5266	Projected	e0	LC	NLD	Lee-Carter projection
all-cause (direct)	Netherlands	Men	2041	83.8009	85.3308	86.6949	Projected	e0	LC	NLD	Lee-Carter projection
all-cause (direct)	Netherlands	Men	2042	83.9555	85.4921	86.867	Projected	e0	LC	NLD	Lee-Carter projection
all-cause (direct)	Netherlands	Men	2043	84.0978	85.6536	87.0297	Projected	e0	LC	NLD	Lee-Carter projection
all-cause (direct)	Netherlands	Men	2044	84.2492	85.8087	87.1908	Projected	e0	LC	NLD	Lee-Carter projection
all-cause (direct)	Netherlands	Men	2045	84.397	85.9632	87.3456	Projected	e0	LC	NLD	Lee-Carter projection
all-cause (direct)	Netherlands	Men	2046	84.5419	86.1156	87.4926	Projected	e0	LC	NLD	Lee-Carter projection
all-cause (direct)	Netherlands	Men	2047	84.6998	86.2676	87.6458	Projected	e0	LC	NLD	Lee-Carter projection
all-cause (direct)	Netherlands	Men	2048	84.8428	86.4174	87.8022	Projected	e0	LC	NLD	Lee-Carter projection
all-cause (direct)	Netherlands	Men	2049	84.9831	86.5655	87.9482	Projected	e0	LC	NLD	Lee-Carter projection
all-cause (direct)	Netherlands	Men	2050	85.1199	86.7076	88.1053	Projected	e0	LC	NLD	Lee-Carter projection
all-cause (direct)	Netherlands	Men	2051	85.2692	86.8534	88.2454	Projected	e0	LC	NLD	Lee-Carter projection
all-cause (direct)	Netherlands	Men	2052	85.4101	86.9938	88.3801	Projected	e0	LC	NLD	Lee-Carter projection
all-cause (direct)	Netherlands	Men	2053	85.5438	87.1315	88.5205	Projected	e0	LC	NLD	Lee-Carter projection
all-cause (direct)	Netherlands	Men	2054	85.693	87.2696	88.6607	Projected	e0	LC	NLD	Lee-Carter projection
all-cause (direct)	Netherlands	Men	2055	85.824	87.4047	88.7909	Projected	e0	LC	NLD	Lee-Carter projection
all-cause (direct)	Netherlands	Men	2056	85.9568	87.5381	88.9233	Projected	e0	LC	NLD	Lee-Carter projection
all-cause (direct)	Netherlands	Men	2057	86.0937	87.6708	89.0596	Projected	e0	LC	NLD	Lee-Carter projection
all-cause (direct)	Netherlands	Men	2058	86.231	87.8011	89.1833	Projected	e0	LC	NLD	Lee-Carter projection
all-cause (direct)	Netherlands	Men	2059	86.355	87.9314	89.3085	Projected	e0	LC	NLD	Lee-Carter projection
all-cause (direct)	Netherlands	Men	2060	86.4904	88.0579	89.4242	Projected	e0	LC	NLD	Lee-Carter projection
all-cause (direct)	Netherlands	Men	2061	86.6146	88.1824	89.5431	Projected	e0	LC	NLD	Lee-Carter projection
all-cause (direct)	Netherlands	Men	2062	86.7409	88.3064	89.6621	Projected	e0	LC	NLD	Lee-Carter projection
all-cause (direct)	Netherlands	Men	2063	86.879	88.4327	89.7702	Projected	e0	LC	NLD	Lee-Carter projection
all-cause (direct)	Netherlands	Men	2064	86.9946	88.5509	89.8941	Projected	e0	LC	NLD	Lee-Carter projection
all-cause (direct)	Netherlands	Men	2065	87.125	88.6684	90.008	Projected	e0	LC	NLD	Lee-Carter projection
all-cause (indirect)	Netherlands	Men	2015	79.8059	80.641	81.4643	Projected	e0	LL	NLD	Our projection
all-cause (indirect)	Netherlands	Men	2016	79.7851	80.8181	81.8229	Projected	e0	LL	NLD	Our projection
all-cause (indirect)	Netherlands	Men	2017	79.9449	81.1206	82.2808	Projected	e0	LL	NLD	Our projection
all-cause (indirect)	Netherlands	Men	2018	80.043	81.3538	82.6254	Projected	e0	LL	NLD	Our projection
all-cause (indirect)	Netherlands	Men	2019	80.2136	81.6273	83.0232	Projected	e0	LL	NLD	Our projection
all-cause (indirect)	Netherlands	Men	2020	80.3591	81.8907	83.3725	Projected	e0	LL	NLD	Our projection
all-cause (indirect)	Netherlands	Men	2021	80.5331	82.1519	83.7286	Projected	e0	LL	NLD	Our projection
all-cause (indirect)	Netherlands	Men	2022	80.7026	82.4126	84.0662	Projected	e0	LL	NLD	Our projection
all-cause (indirect)	Netherlands	Men	2023	80.8932	82.6647	84.3912	Projected	e0	LL	NLD	Our projection
all-cause (indirect)	Netherlands	Men	2024	81.0656	82.9164	84.7052	Projected	e0	LL	NLD	Our projection
all-cause (indirect)	Netherlands	Men	2025	81.2381	83.1589	85.0151	Projected	e0	LL	NLD	Our projection
all-cause (indirect)	Netherlands	Men	2026	81.4244	83.4099	85.3053	Projected	e0	LL	NLD	Our projection
all-cause (indirect)	Netherlands	Men	2027	81.6048	83.654	85.6045	Projected	e0	LL	NLD	Our projection
all-cause (indirect)	Netherlands	Men	2028	81.7916	83.8947	85.8764	Projected	e0	LL	NLD	Our projection
all-cause (indirect)	Netherlands	Men	2029	81.9815	84.1351	86.1674	Projected	e0	LL	NLD	Our projection
all-cause (indirect)	Netherlands	Men	2030	82.1623	84.3676	86.4482	Projected	e0	LL	NLD	Our projection
all-cause (indirect)	Netherlands	Men	2031	82.3437	84.6011	86.7234	Projected	e0	LL	NLD	Our projection
all-cause (indirect)	Netherlands	Men	2032	82.5434	84.8329	86.9862	Projected	e0	LL	NLD	Our projection
all-cause (indirect)	Netherlands	Men	2033	82.7372	85.0701	87.2423	Projected	e0	LL	NLD	Our projection
all-cause (indirect)	Netherlands	Men	2034	82.925	85.2907	87.5011	Projected	e0	LL	NLD	Our projection
all-cause (indirect)	Netherlands	Men	2035	83.1294	85.5159	87.7719	Projected	e0	LL	NLD	Our projection
all-cause (indirect)	Netherlands	Men	2036	83.3091	85.7431	88.0364	Projected	e0	LL	NLD	Our projection
all-cause (indirect)	Netherlands	Men	2037	83.5013	85.9589	88.2756	Projected	e0	LL	NLD	Our projection
all-cause (indirect)	Netherlands	Men	2038	83.6963	86.1811	88.5088	Projected	e0	LL	NLD	Our projection
all-cause (indirect)	Netherlands	Men	2039	83.861	86.4047	88.7687	Projected	e0	LL	NLD	Our projection
all-cause (indirect)	Netherlands	Men	2040	84.073	86.6219	88.9885	Projected	e0	LL	NLD	Our projection
all-cause (indirect)	Netherlands	Men	2041	84.2534	86.8368	89.2234	Projected	e0	LL	NLD	Our projection
all-cause (indirect)	Netherlands	Men	2042	84.4362	87.0447	89.4611	Projected	e0	LL	NLD	Our projection
all-cause (indirect)	Netherlands	Men	2043	84.6216	87.2565	89.6859	Projected	e0	LL	NLD	Our projection
all-cause (indirect)	Netherlands	Men	2044	84.8105	87.4612	89.9165	Projected	e0	LL	NLD	Our projection
all-cause (indirect)	Netherlands	Men	2045	85.0244	87.6633	90.1245	Projected	e0	LL	NLD	Our projection
all-cause (indirect)	Netherlands	Men	2046	85.1808	87.8678	90.3484	Projected	e0	LL	NLD	Our projection
all-cause (indirect)	Netherlands	Men	2047	85.3767	88.0614	90.5715	Projected	e0	LL	NLD	Our projection
all-cause (indirect)	Netherlands	Men	2048	85.5675	88.2591	90.768	Projected	e0	LL	NLD	Our projection
all-cause (indirect)	Netherlands	Men	2049	85.7403	88.4499	90.9668	Projected	e0	LL	NLD	Our projection
all-cause (indirect)	Netherlands	Men	2050	85.9201	88.6396	91.1757	Projected	e0	LL	NLD	Our projection
all-cause (indirect)	Netherlands	Men	2051	86.0954	88.8248	91.3697	Projected	e0	LL	NLD	Our projection
all-cause (indirect)	Netherlands	Men	2052	86.2653	89.0083	91.5622	Projected	e0	LL	NLD	Our projection
all-cause (indirect)	Netherlands	Men	2053	86.4361	89.1877	91.7465	Projected	e0	LL	NLD	Our projection
all-cause (indirect)	Netherlands	Men	2054	86.6115	89.3638	91.9192	Projected	e0	LL	NLD	Our projection
all-cause (indirect)	Netherlands	Men	2055	86.7774	89.5409	92.1126	Projected	e0	LL	NLD	Our projection
all-cause (indirect)	Netherlands	Men	2056	86.9311	89.7097	92.2803	Projected	e0	LL	NLD	Our projection
all-cause (indirect)	Netherlands	Men	2057	87.0942	89.8805	92.4574	Projected	e0	LL	NLD	Our projection
all-cause (indirect)	Netherlands	Men	2058	87.252	90.0428	92.6241	Projected	e0	LL	NLD	Our projection
all-cause (indirect)	Netherlands	Men	2059	87.414	90.2064	92.7923	Projected	e0	LL	NLD	Our projection
all-cause (indirect)	Netherlands	Men	2060	87.5828	90.361	92.9493	Projected	e0	LL	NLD	Our projection
all-cause (indirect)	Netherlands	Men	2061	87.705	90.5166	93.1086	Projected	e0	LL	NLD	Our projection
all-cause (indirect)	Netherlands	Men	2062	87.8628	90.6719	93.2659	Projected	e0	LL	NLD	Our projection
all-cause (indirect)	Netherlands	Men	2063	88.0035	90.8181	93.4188	Projected	e0	LL	NLD	Our projection
all-cause (indirect)	Netherlands	Men	2064	88.1446	90.9617	93.5741	Projected	e0	LL	NLD	Our projection
all-cause (indirect)	Netherlands	Men	2065	88.2786	91.1127	93.7273	Projected	e0	LL	NLD	Our projection
all-cause (direct)	Norway	Men	1990		73.4447		Observed	e0	LC	NOR	Observed
all-cause (direct)	Norway	Men	1991		74.0208		Observed	e0	LC	NOR	Observed
all-cause (direct)	Norway	Men	1992		74.1667		Observed	e0	LC	NOR	Observed
all-cause (direct)	Norway	Men	1993		74.2362		Observed	e0	LC	NOR	Observed
all-cause (direct)	Norway	Men	1994		74.89		Observed	e0	LC	NOR	Observed
all-cause (direct)	Norway	Men	1995		74.7972		Observed	e0	LC	NOR	Observed
all-cause (direct)	Norway	Men	1996		75.3649		Observed	e0	LC	NOR	Observed
all-cause (direct)	Norway	Men	1997		75.4582		Observed	e0	LC	NOR	Observed
all-cause (direct)	Norway	Men	1998		75.5282		Observed	e0	LC	NOR	Observed
all-cause (direct)	Norway	Men	1999		75.6099		Observed	e0	LC	NOR	Observed
all-cause (direct)	Norway	Men	2000		75.9528		Observed	e0	LC	NOR	Observed
all-cause (direct)	Norway	Men	2001		76.201		Observed	e0	LC	NOR	Observed
all-cause (direct)	Norway	Men	2002		76.3986		Observed	e0	LC	NOR	Observed
all-cause (direct)	Norway	Men	2003		77.0376		Observed	e0	LC	NOR	Observed
all-cause (direct)	Norway	Men	2004		77.5001		Observed	e0	LC	NOR	Observed
all-cause (direct)	Norway	Men	2005		77.7208		Observed	e0	LC	NOR	Observed
all-cause (direct)	Norway	Men	2006		78.1196		Observed	e0	LC	NOR	Observed
all-cause (direct)	Norway	Men	2007		78.2337		Observed	e0	LC	NOR	Observed
all-cause (direct)	Norway	Men	2008		78.3135		Observed	e0	LC	NOR	Observed
all-cause (direct)	Norway	Men	2009		78.5922		Observed	e0	LC	NOR	Observed
all-cause (direct)	Norway	Men	2010		78.8491		Observed	e0	LC	NOR	Observed
all-cause (direct)	Norway	Men	2011		78.9958		Observed	e0	LC	NOR	Observed
all-cause (direct)	Norway	Men	2012		79.4133		Observed	e0	LC	NOR	Observed
all-cause (direct)	Norway	Men	2013		79.65		Observed	e0	LC	NOR	Observed
all-cause (direct)	Norway	Men	2014		80.0269		Observed	e0	LC	NOR	Observed
all-cause (direct)	Norway	Men	2015	79.8634	80.4216	80.9786	Projected	e0	LC	NOR	Lee-Carter projection
all-cause (direct)	Norway	Men	2016	79.9679	80.6516	81.3224	Projected	e0	LC	NOR	Lee-Carter projection
all-cause (direct)	Norway	Men	2017	80.0931	80.875	81.6336	Projected	e0	LC	NOR	Lee-Carter projection
all-cause (direct)	Norway	Men	2018	80.2268	81.0955	81.9271	Projected	e0	LC	NOR	Lee-Carter projection
all-cause (direct)	Norway	Men	2019	80.3746	81.3157	82.2127	Projected	e0	LC	NOR	Lee-Carter projection
all-cause (direct)	Norway	Men	2020	80.5145	81.5311	82.4874	Projected	e0	LC	NOR	Lee-Carter projection
all-cause (direct)	Norway	Men	2021	80.6787	81.7447	82.752	Projected	e0	LC	NOR	Lee-Carter projection
all-cause (direct)	Norway	Men	2022	80.8347	81.9564	83.0135	Projected	e0	LC	NOR	Lee-Carter projection
all-cause (direct)	Norway	Men	2023	81.0101	82.1632	83.2543	Projected	e0	LC	NOR	Lee-Carter projection
all-cause (direct)	Norway	Men	2024	81.1704	82.3679	83.5098	Projected	e0	LC	NOR	Lee-Carter projection
all-cause (direct)	Norway	Men	2025	81.3278	82.5685	83.7425	Projected	e0	LC	NOR	Lee-Carter projection
all-cause (direct)	Norway	Men	2026	81.4846	82.7683	83.9782	Projected	e0	LC	NOR	Lee-Carter projection
all-cause (direct)	Norway	Men	2027	81.6493	82.9689	84.1933	Projected	e0	LC	NOR	Lee-Carter projection
all-cause (direct)	Norway	Men	2028	81.8158	83.1664	84.4157	Projected	e0	LC	NOR	Lee-Carter projection
all-cause (direct)	Norway	Men	2029	81.974	83.36	84.6303	Projected	e0	LC	NOR	Lee-Carter projection
all-cause (direct)	Norway	Men	2030	82.1467	83.5514	84.8459	Projected	e0	LC	NOR	Lee-Carter projection
all-cause (direct)	Norway	Men	2031	82.3071	83.741	85.0497	Projected	e0	LC	NOR	Lee-Carter projection
all-cause (direct)	Norway	Men	2032	82.4756	83.929	85.2601	Projected	e0	LC	NOR	Lee-Carter projection
all-cause (direct)	Norway	Men	2033	82.6362	84.113	85.4558	Projected	e0	LC	NOR	Lee-Carter projection
all-cause (direct)	Norway	Men	2034	82.7962	84.298	85.6553	Projected	e0	LC	NOR	Lee-Carter projection
all-cause (direct)	Norway	Men	2035	82.963	84.475	85.8446	Projected	e0	LC	NOR	Lee-Carter projection
all-cause (direct)	Norway	Men	2036	83.1127	84.6476	86.0365	Projected	e0	LC	NOR	Lee-Carter projection
all-cause (direct)	Norway	Men	2037	83.2781	84.8262	86.2147	Projected	e0	LC	NOR	Lee-Carter projection
all-cause (direct)	Norway	Men	2038	83.4334	84.9985	86.3998	Projected	e0	LC	NOR	Lee-Carter projection
all-cause (direct)	Norway	Men	2039	83.5893	85.1661	86.5784	Projected	e0	LC	NOR	Lee-Carter projection
all-cause (direct)	Norway	Men	2040	83.7535	85.3366	86.7411	Projected	e0	LC	NOR	Lee-Carter projection
all-cause (direct)	Norway	Men	2041	83.9032	85.4978	86.9182	Projected	e0	LC	NOR	Lee-Carter projection
all-cause (direct)	Norway	Men	2042	84.0578	85.663	87.0838	Projected	e0	LC	NOR	Lee-Carter projection
all-cause (direct)	Norway	Men	2043	84.2167	85.8267	87.246	Projected	e0	LC	NOR	Lee-Carter projection
all-cause (direct)	Norway	Men	2044	84.3637	85.9856	87.4066	Projected	e0	LC	NOR	Lee-Carter projection
all-cause (direct)	Norway	Men	2045	84.5123	86.1439	87.568	Projected	e0	LC	NOR	Lee-Carter projection
all-cause (direct)	Norway	Men	2046	84.6501	86.2966	87.7219	Projected	e0	LC	NOR	Lee-Carter projection
all-cause (direct)	Norway	Men	2047	84.8023	86.4488	87.875	Projected	e0	LC	NOR	Lee-Carter projection
all-cause (direct)	Norway	Men	2048	84.9519	86.6	88.0229	Projected	e0	LC	NOR	Lee-Carter projection
all-cause (direct)	Norway	Men	2049	85.1036	86.746	88.175	Projected	e0	LC	NOR	Lee-Carter projection
all-cause (direct)	Norway	Men	2050	85.2358	86.8956	88.3163	Projected	e0	LC	NOR	Lee-Carter projection
all-cause (direct)	Norway	Men	2051	85.3912	87.0362	88.4688	Projected	e0	LC	NOR	Lee-Carter projection
all-cause (direct)	Norway	Men	2052	85.5319	87.1845	88.5996	Projected	e0	LC	NOR	Lee-Carter projection
all-cause (direct)	Norway	Men	2053	85.6664	87.3231	88.7264	Projected	e0	LC	NOR	Lee-Carter projection
all-cause (direct)	Norway	Men	2054	85.8098	87.4611	88.8645	Projected	e0	LC	NOR	Lee-Carter projection
all-cause (direct)	Norway	Men	2055	85.9431	87.5959	88.993	Projected	e0	LC	NOR	Lee-Carter projection
all-cause (direct)	Norway	Men	2056	86.0811	87.7304	89.1298	Projected	e0	LC	NOR	Lee-Carter projection
all-cause (direct)	Norway	Men	2057	86.2146	87.8636	89.2582	Projected	e0	LC	NOR	Lee-Carter projection
all-cause (direct)	Norway	Men	2058	86.3469	87.9944	89.3876	Projected	e0	LC	NOR	Lee-Carter projection
all-cause (direct)	Norway	Men	2059	86.4856	88.1245	89.5024	Projected	e0	LC	NOR	Lee-Carter projection
all-cause (direct)	Norway	Men	2060	86.605	88.2492	89.6236	Projected	e0	LC	NOR	Lee-Carter projection
all-cause (direct)	Norway	Men	2061	86.7363	88.3764	89.7481	Projected	e0	LC	NOR	Lee-Carter projection
all-cause (direct)	Norway	Men	2062	86.878	88.5002	89.8693	Projected	e0	LC	NOR	Lee-Carter projection
all-cause (direct)	Norway	Men	2063	86.9966	88.6234	89.9872	Projected	e0	LC	NOR	Lee-Carter projection
all-cause (direct)	Norway	Men	2064	87.1251	88.7406	90.1004	Projected	e0	LC	NOR	Lee-Carter projection
all-cause (direct)	Norway	Men	2065	87.2523	88.858	90.21	Projected	e0	LC	NOR	Lee-Carter projection
all-cause (indirect)	Norway	Men	2015	80.2982	80.8389	81.3594	Projected	e0	LL	NOR	Our projection
all-cause (indirect)	Norway	Men	2016	80.5834	81.2093	81.8116	Projected	e0	LL	NOR	Our projection
all-cause (indirect)	Norway	Men	2017	80.7075	81.4028	82.0625	Projected	e0	LL	NOR	Our projection
all-cause (indirect)	Norway	Men	2018	80.9837	81.7175	82.4201	Projected	e0	LL	NOR	Our projection
all-cause (indirect)	Norway	Men	2019	81.1449	81.9419	82.6925	Projected	e0	LL	NOR	Our projection
all-cause (indirect)	Norway	Men	2020	81.4018	82.2235	83.0022	Projected	e0	LL	NOR	Our projection
all-cause (indirect)	Norway	Men	2021	81.5831	82.4608	83.2844	Projected	e0	LL	NOR	Our projection
all-cause (indirect)	Norway	Men	2022	81.8192	82.7188	83.5574	Projected	e0	LL	NOR	Our projection
all-cause (indirect)	Norway	Men	2023	82.0238	82.9561	83.8218	Projected	e0	LL	NOR	Our projection
all-cause (indirect)	Norway	Men	2024	82.2369	83.2031	84.0957	Projected	e0	LL	NOR	Our projection
all-cause (indirect)	Norway	Men	2025	82.4529	83.4299	84.3456	Projected	e0	LL	NOR	Our projection
all-cause (indirect)	Norway	Men	2026	82.6752	83.6684	84.607	Projected	e0	LL	NOR	Our projection
all-cause (indirect)	Norway	Men	2027	82.8748	83.8945	84.8401	Projected	e0	LL	NOR	Our projection
all-cause (indirect)	Norway	Men	2028	83.0859	84.1219	85.0968	Projected	e0	LL	NOR	Our projection
all-cause (indirect)	Norway	Men	2029	83.2944	84.3408	85.3288	Projected	e0	LL	NOR	Our projection
all-cause (indirect)	Norway	Men	2030	83.4848	84.5629	85.5684	Projected	e0	LL	NOR	Our projection
all-cause (indirect)	Norway	Men	2031	83.6951	84.7781	85.7939	Projected	e0	LL	NOR	Our projection
all-cause (indirect)	Norway	Men	2032	83.8908	84.9927	86.0145	Projected	e0	LL	NOR	Our projection
all-cause (indirect)	Norway	Men	2033	84.0882	85.2071	86.2367	Projected	e0	LL	NOR	Our projection
all-cause (indirect)	Norway	Men	2034	84.2898	85.4096	86.4616	Projected	e0	LL	NOR	Our projection
all-cause (indirect)	Norway	Men	2035	84.4754	85.6162	86.6707	Projected	e0	LL	NOR	Our projection
all-cause (indirect)	Norway	Men	2036	84.6762	85.8195	86.8804	Projected	e0	LL	NOR	Our projection
all-cause (indirect)	Norway	Men	2037	84.8622	86.0226	87.0943	Projected	e0	LL	NOR	Our projection
all-cause (indirect)	Norway	Men	2038	85.0639	86.2221	87.3018	Projected	e0	LL	NOR	Our projection
all-cause (indirect)	Norway	Men	2039	85.2425	86.4207	87.5006	Projected	e0	LL	NOR	Our projection
all-cause (indirect)	Norway	Men	2040	85.4322	86.614	87.7068	Projected	e0	LL	NOR	Our projection
all-cause (indirect)	Norway	Men	2041	85.604	86.8082	87.9026	Projected	e0	LL	NOR	Our projection
all-cause (indirect)	Norway	Men	2042	85.8061	86.9974	88.1026	Projected	e0	LL	NOR	Our projection
all-cause (indirect)	Norway	Men	2043	85.9864	87.1877	88.2933	Projected	e0	LL	NOR	Our projection
all-cause (indirect)	Norway	Men	2044	86.1612	87.3766	88.4836	Projected	e0	LL	NOR	Our projection
all-cause (indirect)	Norway	Men	2045	86.3457	87.5613	88.6726	Projected	e0	LL	NOR	Our projection
all-cause (indirect)	Norway	Men	2046	86.5306	87.7474	88.8674	Projected	e0	LL	NOR	Our projection
all-cause (indirect)	Norway	Men	2047	86.706	87.9276	89.0496	Projected	e0	LL	NOR	Our projection
all-cause (indirect)	Norway	Men	2048	86.8776	88.1055	89.2359	Projected	e0	LL	NOR	Our projection
all-cause (indirect)	Norway	Men	2049	87.0575	88.286	89.4155	Projected	e0	LL	NOR	Our projection
all-cause (indirect)	Norway	Men	2050	87.2312	88.4606	89.5945	Projected	e0	LL	NOR	Our projection
all-cause (indirect)	Norway	Men	2051	87.4025	88.6337	89.7692	Projected	e0	LL	NOR	Our projection
all-cause (indirect)	Norway	Men	2052	87.5727	88.8082	89.9479	Projected	e0	LL	NOR	Our projection
all-cause (indirect)	Norway	Men	2053	87.7533	88.979	90.1031	Projected	e0	LL	NOR	Our projection
all-cause (indirect)	Norway	Men	2054	87.9111	89.1491	90.2831	Projected	e0	LL	NOR	Our projection
all-cause (indirect)	Norway	Men	2055	88.0868	89.3171	90.4424	Projected	e0	LL	NOR	Our projection
all-cause (indirect)	Norway	Men	2056	88.2519	89.4803	90.6152	Projected	e0	LL	NOR	Our projection
all-cause (indirect)	Norway	Men	2057	88.3939	89.6422	90.7721	Projected	e0	LL	NOR	Our projection
all-cause (indirect)	Norway	Men	2058	88.5707	89.8016	90.9391	Projected	e0	LL	NOR	Our projection
all-cause (indirect)	Norway	Men	2059	88.7257	89.9648	91.0943	Projected	e0	LL	NOR	Our projection
all-cause (indirect)	Norway	Men	2060	88.8881	90.1163	91.2515	Projected	e0	LL	NOR	Our projection
all-cause (indirect)	Norway	Men	2061	89.0358	90.2724	91.4059	Projected	e0	LL	NOR	Our projection
all-cause (indirect)	Norway	Men	2062	89.1986	90.4223	91.5559	Projected	e0	LL	NOR	Our projection
all-cause (indirect)	Norway	Men	2063	89.3407	90.5733	91.7057	Projected	e0	LL	NOR	Our projection
all-cause (indirect)	Norway	Men	2064	89.4977	90.7208	91.8549	Projected	e0	LL	NOR	Our projection
all-cause (indirect)	Norway	Men	2065	89.6461	90.8698	92.0005	Projected	e0	LL	NOR	Our projection
all-cause (direct)	Poland	Men	1990		66.2504		Observed	e0	LC	POL	Observed
all-cause (direct)	Poland	Men	1991		65.8704		Observed	e0	LC	POL	Observed
all-cause (direct)	Poland	Men	1992		66.4518		Observed	e0	LC	POL	Observed
all-cause (direct)	Poland	Men	1993		67.1178		Observed	e0	LC	POL	Observed
all-cause (direct)	Poland	Men	1994		67.4314		Observed	e0	LC	POL	Observed
all-cause (direct)	Poland	Men	1995		67.5546		Observed	e0	LC	POL	Observed
all-cause (direct)	Poland	Men	1996		68.001		Observed	e0	LC	POL	Observed
all-cause (direct)	Poland	Men	1997		68.3015		Observed	e0	LC	POL	Observed
all-cause (direct)	Poland	Men	1998		68.6638		Observed	e0	LC	POL	Observed
all-cause (direct)	Poland	Men	1999		68.6315		Observed	e0	LC	POL	Observed
all-cause (direct)	Poland	Men	2000		69.5258		Observed	e0	LC	POL	Observed
all-cause (direct)	Poland	Men	2001		70.0544		Observed	e0	LC	POL	Observed
all-cause (direct)	Poland	Men	2002		70.3746		Observed	e0	LC	POL	Observed
all-cause (direct)	Poland	Men	2003		70.5702		Observed	e0	LC	POL	Observed
all-cause (direct)	Poland	Men	2004		70.7161		Observed	e0	LC	POL	Observed
all-cause (direct)	Poland	Men	2005		70.8508		Observed	e0	LC	POL	Observed
all-cause (direct)	Poland	Men	2006		71.0064		Observed	e0	LC	POL	Observed
all-cause (direct)	Poland	Men	2007		71.0357		Observed	e0	LC	POL	Observed
all-cause (direct)	Poland	Men	2008		71.3249		Observed	e0	LC	POL	Observed
all-cause (direct)	Poland	Men	2009		71.6053		Observed	e0	LC	POL	Observed
all-cause (direct)	Poland	Men	2010		72.1548		Observed	e0	LC	POL	Observed
all-cause (direct)	Poland	Men	2011		72.5124		Observed	e0	LC	POL	Observed
all-cause (direct)	Poland	Men	2012		72.6215		Observed	e0	LC	POL	Observed
all-cause (direct)	Poland	Men	2013		72.9794		Observed	e0	LC	POL	Observed
all-cause (direct)	Poland	Men	2014		73.6577		Observed	e0	LC	POL	Observed
all-cause (direct)	Poland	Men	2015	73.6062	74.2038	74.7921	Projected	e0	LC	POL	Lee-Carter projection
all-cause (direct)	Poland	Men	2016	73.7427	74.4672	75.174	Projected	e0	LC	POL	Lee-Carter projection
all-cause (direct)	Poland	Men	2017	73.8964	74.7271	75.5374	Projected	e0	LC	POL	Lee-Carter projection
all-cause (direct)	Poland	Men	2018	74.0566	74.983	75.8849	Projected	e0	LC	POL	Lee-Carter projection
all-cause (direct)	Poland	Men	2019	74.2322	75.2398	76.2226	Projected	e0	LC	POL	Lee-Carter projection
all-cause (direct)	Poland	Men	2020	74.406	75.4966	76.5518	Projected	e0	LC	POL	Lee-Carter projection
all-cause (direct)	Poland	Men	2021	74.5978	75.7462	76.8644	Projected	e0	LC	POL	Lee-Carter projection
all-cause (direct)	Poland	Men	2022	74.7799	75.9986	77.1807	Projected	e0	LC	POL	Lee-Carter projection
all-cause (direct)	Poland	Men	2023	74.9794	76.2465	77.4775	Projected	e0	LC	POL	Lee-Carter projection
all-cause (direct)	Poland	Men	2024	75.1672	76.4937	77.7745	Projected	e0	LC	POL	Lee-Carter projection
all-cause (direct)	Poland	Men	2025	75.3683	76.7387	78.0669	Projected	e0	LC	POL	Lee-Carter projection
all-cause (direct)	Poland	Men	2026	75.565	76.9805	78.3465	Projected	e0	LC	POL	Lee-Carter projection
all-cause (direct)	Poland	Men	2027	75.7467	77.2238	78.6262	Projected	e0	LC	POL	Lee-Carter projection
all-cause (direct)	Poland	Men	2028	75.95	77.465	78.9072	Projected	e0	LC	POL	Lee-Carter projection
all-cause (direct)	Poland	Men	2029	76.1496	77.7024	79.1796	Projected	e0	LC	POL	Lee-Carter projection
all-cause (direct)	Poland	Men	2030	76.3463	77.937	79.4515	Projected	e0	LC	POL	Lee-Carter projection
all-cause (direct)	Poland	Men	2031	76.5436	78.1739	79.7191	Projected	e0	LC	POL	Lee-Carter projection
all-cause (direct)	Poland	Men	2032	76.7493	78.406	79.9817	Projected	e0	LC	POL	Lee-Carter projection
all-cause (direct)	Poland	Men	2033	76.9418	78.6399	80.2497	Projected	e0	LC	POL	Lee-Carter projection
all-cause (direct)	Poland	Men	2034	77.1425	78.8694	80.5005	Projected	e0	LC	POL	Lee-Carter projection
all-cause (direct)	Poland	Men	2035	77.3352	79.0949	80.7574	Projected	e0	LC	POL	Lee-Carter projection
all-cause (direct)	Poland	Men	2036	77.5478	79.3242	81.0116	Projected	e0	LC	POL	Lee-Carter projection
all-cause (direct)	Poland	Men	2037	77.7493	79.5494	81.2782	Projected	e0	LC	POL	Lee-Carter projection
all-cause (direct)	Poland	Men	2038	77.9462	79.7699	81.5182	Projected	e0	LC	POL	Lee-Carter projection
all-cause (direct)	Poland	Men	2039	78.1457	79.993	81.7644	Projected	e0	LC	POL	Lee-Carter projection
all-cause (direct)	Poland	Men	2040	78.3419	80.215	81.9964	Projected	e0	LC	POL	Lee-Carter projection
all-cause (direct)	Poland	Men	2041	78.5409	80.4305	82.2332	Projected	e0	LC	POL	Lee-Carter projection
all-cause (direct)	Poland	Men	2042	78.7399	80.6496	82.4655	Projected	e0	LC	POL	Lee-Carter projection
all-cause (direct)	Poland	Men	2043	78.9328	80.8664	82.6984	Projected	e0	LC	POL	Lee-Carter projection
all-cause (direct)	Poland	Men	2044	79.1367	81.0793	82.9195	Projected	e0	LC	POL	Lee-Carter projection
all-cause (direct)	Poland	Men	2045	79.3238	81.2906	83.152	Projected	e0	LC	POL	Lee-Carter projection
all-cause (direct)	Poland	Men	2046	79.5044	81.5034	83.368	Projected	e0	LC	POL	Lee-Carter projection
all-cause (direct)	Poland	Men	2047	79.7089	81.7145	83.582	Projected	e0	LC	POL	Lee-Carter projection
all-cause (direct)	Poland	Men	2048	79.8939	81.9216	83.8077	Projected	e0	LC	POL	Lee-Carter projection
all-cause (direct)	Poland	Men	2049	80.088	82.1265	84.033	Projected	e0	LC	POL	Lee-Carter projection
all-cause (direct)	Poland	Men	2050	80.29	82.3316	84.2464	Projected	e0	LC	POL	Lee-Carter projection
all-cause (direct)	Poland	Men	2051	80.4911	82.5341	84.4574	Projected	e0	LC	POL	Lee-Carter projection
all-cause (direct)	Poland	Men	2052	80.6671	82.739	84.6711	Projected	e0	LC	POL	Lee-Carter projection
all-cause (direct)	Poland	Men	2053	80.8578	82.9378	84.8704	Projected	e0	LC	POL	Lee-Carter projection
all-cause (direct)	Poland	Men	2054	81.0497	83.1387	85.0782	Projected	e0	LC	POL	Lee-Carter projection
all-cause (direct)	Poland	Men	2055	81.2244	83.336	85.2814	Projected	e0	LC	POL	Lee-Carter projection
all-cause (direct)	Poland	Men	2056	81.4093	83.528	85.4742	Projected	e0	LC	POL	Lee-Carter projection
all-cause (direct)	Poland	Men	2057	81.6047	83.7205	85.6787	Projected	e0	LC	POL	Lee-Carter projection
all-cause (direct)	Poland	Men	2058	81.7925	83.9146	85.8833	Projected	e0	LC	POL	Lee-Carter projection
all-cause (direct)	Poland	Men	2059	81.9565	84.1081	86.0737	Projected	e0	LC	POL	Lee-Carter projection
all-cause (direct)	Poland	Men	2060	82.1355	84.3005	86.2647	Projected	e0	LC	POL	Lee-Carter projection
all-cause (direct)	Poland	Men	2061	82.3204	84.4793	86.4495	Projected	e0	LC	POL	Lee-Carter projection
all-cause (direct)	Poland	Men	2062	82.5075	84.6678	86.627	Projected	e0	LC	POL	Lee-Carter projection
all-cause (direct)	Poland	Men	2063	82.6869	84.8557	86.8087	Projected	e0	LC	POL	Lee-Carter projection
all-cause (direct)	Poland	Men	2064	82.8671	85.032	86.9913	Projected	e0	LC	POL	Lee-Carter projection
all-cause (direct)	Poland	Men	2065	83.0384	85.2129	87.1692	Projected	e0	LC	POL	Lee-Carter projection
all-cause (indirect)	Poland	Men	2015	73.8283	74.7122	75.566	Projected	e0	LL	POL	Our projection
all-cause (indirect)	Poland	Men	2016	74.1027	75.2039	76.2426	Projected	e0	LL	POL	Our projection
all-cause (indirect)	Poland	Men	2017	74.4753	75.6943	76.8354	Projected	e0	LL	POL	Our projection
all-cause (indirect)	Poland	Men	2018	74.8193	76.1672	77.4208	Projected	e0	LL	POL	Our projection
all-cause (indirect)	Poland	Men	2019	75.1917	76.6336	77.9633	Projected	e0	LL	POL	Our projection
all-cause (indirect)	Poland	Men	2020	75.5502	77.0915	78.4853	Projected	e0	LL	POL	Our projection
all-cause (indirect)	Poland	Men	2021	75.9137	77.5265	78.9697	Projected	e0	LL	POL	Our projection
all-cause (indirect)	Poland	Men	2022	76.2786	77.9578	79.4515	Projected	e0	LL	POL	Our projection
all-cause (indirect)	Poland	Men	2023	76.6063	78.3616	79.901	Projected	e0	LL	POL	Our projection
all-cause (indirect)	Poland	Men	2024	76.9591	78.7519	80.3232	Projected	e0	LL	POL	Our projection
all-cause (indirect)	Poland	Men	2025	77.2851	79.1388	80.7481	Projected	e0	LL	POL	Our projection
all-cause (indirect)	Poland	Men	2026	77.6307	79.5133	81.1295	Projected	e0	LL	POL	Our projection
all-cause (indirect)	Poland	Men	2027	77.9487	79.8726	81.5242	Projected	e0	LL	POL	Our projection
all-cause (indirect)	Poland	Men	2028	78.268	80.2184	81.8804	Projected	e0	LL	POL	Our projection
all-cause (indirect)	Poland	Men	2029	78.5886	80.5522	82.2462	Projected	e0	LL	POL	Our projection
all-cause (indirect)	Poland	Men	2030	78.8819	80.8932	82.5959	Projected	e0	LL	POL	Our projection
all-cause (indirect)	Poland	Men	2031	79.1862	81.2191	82.9345	Projected	e0	LL	POL	Our projection
all-cause (indirect)	Poland	Men	2032	79.4839	81.5303	83.2578	Projected	e0	LL	POL	Our projection
all-cause (indirect)	Poland	Men	2033	79.7774	81.8493	83.5685	Projected	e0	LL	POL	Our projection
all-cause (indirect)	Poland	Men	2034	80.0669	82.1464	83.8841	Projected	e0	LL	POL	Our projection
all-cause (indirect)	Poland	Men	2035	80.3152	82.4459	84.1791	Projected	e0	LL	POL	Our projection
all-cause (indirect)	Poland	Men	2036	80.6039	82.7295	84.476	Projected	e0	LL	POL	Our projection
all-cause (indirect)	Poland	Men	2037	80.87	83.0153	84.7556	Projected	e0	LL	POL	Our projection
all-cause (indirect)	Poland	Men	2038	81.1421	83.2934	85.0398	Projected	e0	LL	POL	Our projection
all-cause (indirect)	Poland	Men	2039	81.3847	83.5713	85.2988	Projected	e0	LL	POL	Our projection
all-cause (indirect)	Poland	Men	2040	81.6631	83.8364	85.5726	Projected	e0	LL	POL	Our projection
all-cause (indirect)	Poland	Men	2041	81.9182	84.1018	85.8257	Projected	e0	LL	POL	Our projection
all-cause (indirect)	Poland	Men	2042	82.193	84.3612	86.0709	Projected	e0	LL	POL	Our projection
all-cause (indirect)	Poland	Men	2043	82.448	84.6115	86.3281	Projected	e0	LL	POL	Our projection
all-cause (indirect)	Poland	Men	2044	82.7092	84.8673	86.5709	Projected	e0	LL	POL	Our projection
all-cause (indirect)	Poland	Men	2045	82.9623	85.1139	86.8006	Projected	e0	LL	POL	Our projection
all-cause (indirect)	Poland	Men	2046	83.2239	85.353	87.0389	Projected	e0	LL	POL	Our projection
all-cause (indirect)	Poland	Men	2047	83.4689	85.5938	87.2745	Projected	e0	LL	POL	Our projection
all-cause (indirect)	Poland	Men	2048	83.7074	85.8295	87.504	Projected	e0	LL	POL	Our projection
all-cause (indirect)	Poland	Men	2049	83.9673	86.0621	87.7246	Projected	e0	LL	POL	Our projection
all-cause (indirect)	Poland	Men	2050	84.2059	86.291	87.9409	Projected	e0	LL	POL	Our projection
all-cause (indirect)	Poland	Men	2051	84.4498	86.5192	88.1578	Projected	e0	LL	POL	Our projection
all-cause (indirect)	Poland	Men	2052	84.6848	86.7414	88.3698	Projected	e0	LL	POL	Our projection
all-cause (indirect)	Poland	Men	2053	84.9194	86.9561	88.5764	Projected	e0	LL	POL	Our projection
all-cause (indirect)	Poland	Men	2054	85.1459	87.176	88.7795	Projected	e0	LL	POL	Our projection
all-cause (indirect)	Poland	Men	2055	85.3954	87.391	88.9713	Projected	e0	LL	POL	Our projection
all-cause (indirect)	Poland	Men	2056	85.6254	87.6037	89.1717	Projected	e0	LL	POL	Our projection
all-cause (indirect)	Poland	Men	2057	85.8619	87.8142	89.371	Projected	e0	LL	POL	Our projection
all-cause (indirect)	Poland	Men	2058	86.0707	88.0153	89.5561	Projected	e0	LL	POL	Our projection
all-cause (indirect)	Poland	Men	2059	86.2963	88.216	89.7503	Projected	e0	LL	POL	Our projection
all-cause (indirect)	Poland	Men	2060	86.5097	88.4184	89.9297	Projected	e0	LL	POL	Our projection
all-cause (indirect)	Poland	Men	2061	86.7257	88.6128	90.1251	Projected	e0	LL	POL	Our projection
all-cause (indirect)	Poland	Men	2062	86.9443	88.8107	90.3031	Projected	e0	LL	POL	Our projection
all-cause (indirect)	Poland	Men	2063	87.1588	88.9992	90.4854	Projected	e0	LL	POL	Our projection
all-cause (indirect)	Poland	Men	2064	87.3672	89.1862	90.656	Projected	e0	LL	POL	Our projection
all-cause (indirect)	Poland	Men	2065	87.5688	89.3701	90.8401	Projected	e0	LL	POL	Our projection
all-cause (direct)	Slovenia	Men	1990		69.7674		Observed	e0	LC	SVN	Observed
all-cause (direct)	Slovenia	Men	1991		69.4271		Observed	e0	LC	SVN	Observed
all-cause (direct)	Slovenia	Men	1992		69.5649		Observed	e0	LC	SVN	Observed
all-cause (direct)	Slovenia	Men	1993		69.3355		Observed	e0	LC	SVN	Observed
all-cause (direct)	Slovenia	Men	1994		69.9979		Observed	e0	LC	SVN	Observed
all-cause (direct)	Slovenia	Men	1995		70.7226		Observed	e0	LC	SVN	Observed
all-cause (direct)	Slovenia	Men	1996		71.1644		Observed	e0	LC	SVN	Observed
all-cause (direct)	Slovenia	Men	1997		71.0654		Observed	e0	LC	SVN	Observed
all-cause (direct)	Slovenia	Men	1998		71.212		Observed	e0	LC	SVN	Observed
all-cause (direct)	Slovenia	Men	1999		71.7231		Observed	e0	LC	SVN	Observed
all-cause (direct)	Slovenia	Men	2000		72.1668		Observed	e0	LC	SVN	Observed
all-cause (direct)	Slovenia	Men	2001		72.2537		Observed	e0	LC	SVN	Observed
all-cause (direct)	Slovenia	Men	2002		72.5691		Observed	e0	LC	SVN	Observed
all-cause (direct)	Slovenia	Men	2003		72.5226		Observed	e0	LC	SVN	Observed
all-cause (direct)	Slovenia	Men	2004		73.5192		Observed	e0	LC	SVN	Observed
all-cause (direct)	Slovenia	Men	2005		73.952		Observed	e0	LC	SVN	Observed
all-cause (direct)	Slovenia	Men	2006		74.3959		Observed	e0	LC	SVN	Observed
all-cause (direct)	Slovenia	Men	2007		74.5984		Observed	e0	LC	SVN	Observed
all-cause (direct)	Slovenia	Men	2008		75.4146		Observed	e0	LC	SVN	Observed
all-cause (direct)	Slovenia	Men	2009		75.7516		Observed	e0	LC	SVN	Observed
all-cause (direct)	Slovenia	Men	2010		76.2779		Observed	e0	LC	SVN	Observed
all-cause (direct)	Slovenia	Men	2011		76.6127		Observed	e0	LC	SVN	Observed
all-cause (direct)	Slovenia	Men	2012		76.9561		Observed	e0	LC	SVN	Observed
all-cause (direct)	Slovenia	Men	2013		76.9857		Observed	e0	LC	SVN	Observed
all-cause (direct)	Slovenia	Men	2014		77.9646		Observed	e0	LC	SVN	Observed
all-cause (direct)	Slovenia	Men	2015	77.6491	78.4513	79.2247	Projected	e0	LC	SVN	Lee-Carter projection
all-cause (direct)	Slovenia	Men	2016	77.7576	78.7288	79.6597	Projected	e0	LC	SVN	Lee-Carter projection
all-cause (direct)	Slovenia	Men	2017	77.8861	79.0038	80.0622	Projected	e0	LC	SVN	Lee-Carter projection
all-cause (direct)	Slovenia	Men	2018	78.0472	79.2652	80.4333	Projected	e0	LC	SVN	Lee-Carter projection
all-cause (direct)	Slovenia	Men	2019	78.2103	79.535	80.7803	Projected	e0	LC	SVN	Lee-Carter projection
all-cause (direct)	Slovenia	Men	2020	78.3839	79.798	81.1181	Projected	e0	LC	SVN	Lee-Carter projection
all-cause (direct)	Slovenia	Men	2021	78.5582	80.0564	81.4629	Projected	e0	LC	SVN	Lee-Carter projection
all-cause (direct)	Slovenia	Men	2022	78.7327	80.3143	81.7736	Projected	e0	LC	SVN	Lee-Carter projection
all-cause (direct)	Slovenia	Men	2023	78.9294	80.5684	82.0738	Projected	e0	LC	SVN	Lee-Carter projection
all-cause (direct)	Slovenia	Men	2024	79.12	80.8177	82.3858	Projected	e0	LC	SVN	Lee-Carter projection
all-cause (direct)	Slovenia	Men	2025	79.2991	81.0602	82.6744	Projected	e0	LC	SVN	Lee-Carter projection
all-cause (direct)	Slovenia	Men	2026	79.4948	81.3004	82.9612	Projected	e0	LC	SVN	Lee-Carter projection
all-cause (direct)	Slovenia	Men	2027	79.6704	81.5404	83.2362	Projected	e0	LC	SVN	Lee-Carter projection
all-cause (direct)	Slovenia	Men	2028	79.8595	81.7765	83.5108	Projected	e0	LC	SVN	Lee-Carter projection
all-cause (direct)	Slovenia	Men	2029	80.0641	82.0199	83.7768	Projected	e0	LC	SVN	Lee-Carter projection
all-cause (direct)	Slovenia	Men	2030	80.2543	82.2532	84.0368	Projected	e0	LC	SVN	Lee-Carter projection
all-cause (direct)	Slovenia	Men	2031	80.4468	82.4811	84.2928	Projected	e0	LC	SVN	Lee-Carter projection
all-cause (direct)	Slovenia	Men	2032	80.6276	82.708	84.5433	Projected	e0	LC	SVN	Lee-Carter projection
all-cause (direct)	Slovenia	Men	2033	80.8333	82.9275	84.7874	Projected	e0	LC	SVN	Lee-Carter projection
all-cause (direct)	Slovenia	Men	2034	81.0375	83.1403	85.0227	Projected	e0	LC	SVN	Lee-Carter projection
all-cause (direct)	Slovenia	Men	2035	81.2309	83.3597	85.2572	Projected	e0	LC	SVN	Lee-Carter projection
all-cause (direct)	Slovenia	Men	2036	81.4158	83.5699	85.477	Projected	e0	LC	SVN	Lee-Carter projection
all-cause (direct)	Slovenia	Men	2037	81.5926	83.7818	85.7047	Projected	e0	LC	SVN	Lee-Carter projection
all-cause (direct)	Slovenia	Men	2038	81.7774	83.9831	85.928	Projected	e0	LC	SVN	Lee-Carter projection
all-cause (direct)	Slovenia	Men	2039	81.97	84.1943	86.137	Projected	e0	LC	SVN	Lee-Carter projection
all-cause (direct)	Slovenia	Men	2040	82.1536	84.3959	86.3459	Projected	e0	LC	SVN	Lee-Carter projection
all-cause (direct)	Slovenia	Men	2041	82.343	84.5994	86.5602	Projected	e0	LC	SVN	Lee-Carter projection
all-cause (direct)	Slovenia	Men	2042	82.541	84.7974	86.7617	Projected	e0	LC	SVN	Lee-Carter projection
all-cause (direct)	Slovenia	Men	2043	82.7213	84.9893	86.9602	Projected	e0	LC	SVN	Lee-Carter projection
all-cause (direct)	Slovenia	Men	2044	82.8893	85.1813	87.1443	Projected	e0	LC	SVN	Lee-Carter projection
all-cause (direct)	Slovenia	Men	2045	83.09	85.3705	87.3524	Projected	e0	LC	SVN	Lee-Carter projection
all-cause (direct)	Slovenia	Men	2046	83.2659	85.5606	87.5484	Projected	e0	LC	SVN	Lee-Carter projection
all-cause (direct)	Slovenia	Men	2047	83.456	85.7404	87.7355	Projected	e0	LC	SVN	Lee-Carter projection
all-cause (direct)	Slovenia	Men	2048	83.6285	85.922	87.9208	Projected	e0	LC	SVN	Lee-Carter projection
all-cause (direct)	Slovenia	Men	2049	83.8101	86.1072	88.09	Projected	e0	LC	SVN	Lee-Carter projection
all-cause (direct)	Slovenia	Men	2050	83.9803	86.2832	88.2654	Projected	e0	LC	SVN	Lee-Carter projection
all-cause (direct)	Slovenia	Men	2051	84.1533	86.4573	88.4353	Projected	e0	LC	SVN	Lee-Carter projection
all-cause (direct)	Slovenia	Men	2052	84.3233	86.632	88.6062	Projected	e0	LC	SVN	Lee-Carter projection
all-cause (direct)	Slovenia	Men	2053	84.5054	86.7987	88.7681	Projected	e0	LC	SVN	Lee-Carter projection
all-cause (direct)	Slovenia	Men	2054	84.6588	86.9716	88.9296	Projected	e0	LC	SVN	Lee-Carter projection
all-cause (direct)	Slovenia	Men	2055	84.8308	87.1419	89.0877	Projected	e0	LC	SVN	Lee-Carter projection
all-cause (direct)	Slovenia	Men	2056	84.987	87.3045	89.2327	Projected	e0	LC	SVN	Lee-Carter projection
all-cause (direct)	Slovenia	Men	2057	85.1515	87.4662	89.3954	Projected	e0	LC	SVN	Lee-Carter projection
all-cause (direct)	Slovenia	Men	2058	85.3047	87.6239	89.5497	Projected	e0	LC	SVN	Lee-Carter projection
all-cause (direct)	Slovenia	Men	2059	85.4785	87.782	89.7015	Projected	e0	LC	SVN	Lee-Carter projection
all-cause (direct)	Slovenia	Men	2060	85.631	87.9389	89.8433	Projected	e0	LC	SVN	Lee-Carter projection
all-cause (direct)	Slovenia	Men	2061	85.7876	88.0936	89.9942	Projected	e0	LC	SVN	Lee-Carter projection
all-cause (direct)	Slovenia	Men	2062	85.9455	88.2457	90.1421	Projected	e0	LC	SVN	Lee-Carter projection
all-cause (direct)	Slovenia	Men	2063	86.103	88.3927	90.2833	Projected	e0	LC	SVN	Lee-Carter projection
all-cause (direct)	Slovenia	Men	2064	86.2588	88.5387	90.417	Projected	e0	LC	SVN	Lee-Carter projection
all-cause (direct)	Slovenia	Men	2065	86.4082	88.6828	90.5491	Projected	e0	LC	SVN	Lee-Carter projection
all-cause (indirect)	Slovenia	Men	2015	77.4033	78.5156	79.5139	Projected	e0	LL	SVN	Our projection
all-cause (indirect)	Slovenia	Men	2016	77.5099	78.878	80.0828	Projected	e0	LL	SVN	Our projection
all-cause (indirect)	Slovenia	Men	2017	77.6737	79.2364	80.5818	Projected	e0	LL	SVN	Our projection
all-cause (indirect)	Slovenia	Men	2018	77.8726	79.584	81.021	Projected	e0	LL	SVN	Our projection
all-cause (indirect)	Slovenia	Men	2019	78.071	79.9186	81.4519	Projected	e0	LL	SVN	Our projection
all-cause (indirect)	Slovenia	Men	2020	78.2819	80.2544	81.8444	Projected	e0	LL	SVN	Our projection
all-cause (indirect)	Slovenia	Men	2021	78.4826	80.5764	82.2085	Projected	e0	LL	SVN	Our projection
all-cause (indirect)	Slovenia	Men	2022	78.7264	80.8899	82.5607	Projected	e0	LL	SVN	Our projection
all-cause (indirect)	Slovenia	Men	2023	78.9542	81.1958	82.9133	Projected	e0	LL	SVN	Our projection
all-cause (indirect)	Slovenia	Men	2024	79.1886	81.4858	83.2442	Projected	e0	LL	SVN	Our projection
all-cause (indirect)	Slovenia	Men	2025	79.4247	81.7773	83.5666	Projected	e0	LL	SVN	Our projection
all-cause (indirect)	Slovenia	Men	2026	79.6808	82.0597	83.8663	Projected	e0	LL	SVN	Our projection
all-cause (indirect)	Slovenia	Men	2027	79.8996	82.3348	84.1501	Projected	e0	LL	SVN	Our projection
all-cause (indirect)	Slovenia	Men	2028	80.107	82.598	84.4233	Projected	e0	LL	SVN	Our projection
all-cause (indirect)	Slovenia	Men	2029	80.33	82.8596	84.6932	Projected	e0	LL	SVN	Our projection
all-cause (indirect)	Slovenia	Men	2030	80.5485	83.1163	84.9601	Projected	e0	LL	SVN	Our projection
all-cause (indirect)	Slovenia	Men	2031	80.76	83.3722	85.2148	Projected	e0	LL	SVN	Our projection
all-cause (indirect)	Slovenia	Men	2032	81.0028	83.6147	85.4493	Projected	e0	LL	SVN	Our projection
all-cause (indirect)	Slovenia	Men	2033	81.211	83.856	85.6968	Projected	e0	LL	SVN	Our projection
all-cause (indirect)	Slovenia	Men	2034	81.3985	84.0894	85.9172	Projected	e0	LL	SVN	Our projection
all-cause (indirect)	Slovenia	Men	2035	81.6266	84.3251	86.156	Projected	e0	LL	SVN	Our projection
all-cause (indirect)	Slovenia	Men	2036	81.8583	84.5477	86.3792	Projected	e0	LL	SVN	Our projection
all-cause (indirect)	Slovenia	Men	2037	82.0453	84.7688	86.5953	Projected	e0	LL	SVN	Our projection
all-cause (indirect)	Slovenia	Men	2038	82.248	84.9908	86.7937	Projected	e0	LL	SVN	Our projection
all-cause (indirect)	Slovenia	Men	2039	82.4675	85.2017	86.9984	Projected	e0	LL	SVN	Our projection
all-cause (indirect)	Slovenia	Men	2040	82.6454	85.4125	87.192	Projected	e0	LL	SVN	Our projection
all-cause (indirect)	Slovenia	Men	2041	82.8585	85.6183	87.3902	Projected	e0	LL	SVN	Our projection
all-cause (indirect)	Slovenia	Men	2042	83.0552	85.8313	87.5904	Projected	e0	LL	SVN	Our projection
all-cause (indirect)	Slovenia	Men	2043	83.2527	86.0336	87.7823	Projected	e0	LL	SVN	Our projection
all-cause (indirect)	Slovenia	Men	2044	83.4403	86.2369	87.9738	Projected	e0	LL	SVN	Our projection
all-cause (indirect)	Slovenia	Men	2045	83.6365	86.4302	88.1558	Projected	e0	LL	SVN	Our projection
all-cause (indirect)	Slovenia	Men	2046	83.8381	86.6288	88.332	Projected	e0	LL	SVN	Our projection
all-cause (indirect)	Slovenia	Men	2047	84.0218	86.8182	88.511	Projected	e0	LL	SVN	Our projection
all-cause (indirect)	Slovenia	Men	2048	84.207	87.0132	88.6818	Projected	e0	LL	SVN	Our projection
all-cause (indirect)	Slovenia	Men	2049	84.3852	87.2007	88.8596	Projected	e0	LL	SVN	Our projection
all-cause (indirect)	Slovenia	Men	2050	84.5975	87.3829	89.025	Projected	e0	LL	SVN	Our projection
all-cause (indirect)	Slovenia	Men	2051	84.7779	87.5663	89.1907	Projected	e0	LL	SVN	Our projection
all-cause (indirect)	Slovenia	Men	2052	84.9681	87.7494	89.3466	Projected	e0	LL	SVN	Our projection
all-cause (indirect)	Slovenia	Men	2053	85.1632	87.9281	89.5126	Projected	e0	LL	SVN	Our projection
all-cause (indirect)	Slovenia	Men	2054	85.3383	88.1058	89.6682	Projected	e0	LL	SVN	Our projection
all-cause (indirect)	Slovenia	Men	2055	85.5352	88.2804	89.8302	Projected	e0	LL	SVN	Our projection
all-cause (indirect)	Slovenia	Men	2056	85.6944	88.4535	89.9816	Projected	e0	LL	SVN	Our projection
all-cause (indirect)	Slovenia	Men	2057	85.8673	88.6222	90.135	Projected	e0	LL	SVN	Our projection
all-cause (indirect)	Slovenia	Men	2058	86.0583	88.7911	90.2794	Projected	e0	LL	SVN	Our projection
all-cause (indirect)	Slovenia	Men	2059	86.2322	88.9598	90.4356	Projected	e0	LL	SVN	Our projection
all-cause (indirect)	Slovenia	Men	2060	86.4213	89.1259	90.577	Projected	e0	LL	SVN	Our projection
all-cause (indirect)	Slovenia	Men	2061	86.61	89.2846	90.7208	Projected	e0	LL	SVN	Our projection
all-cause (indirect)	Slovenia	Men	2062	86.782	89.4448	90.8678	Projected	e0	LL	SVN	Our projection
all-cause (indirect)	Slovenia	Men	2063	86.9545	89.6011	91.0027	Projected	e0	LL	SVN	Our projection
all-cause (indirect)	Slovenia	Men	2064	87.109	89.7584	91.1356	Projected	e0	LL	SVN	Our projection
all-cause (indirect)	Slovenia	Men	2065	87.2868	89.9105	91.2732	Projected	e0	LL	SVN	Our projection
all-cause (direct)	Sweden	Men	1990		74.8088		Observed	e0	LC	SWE	Observed
all-cause (direct)	Sweden	Men	1991		74.9417		Observed	e0	LC	SWE	Observed
all-cause (direct)	Sweden	Men	1992		75.3584		Observed	e0	LC	SWE	Observed
all-cause (direct)	Sweden	Men	1993		75.4895		Observed	e0	LC	SWE	Observed
all-cause (direct)	Sweden	Men	1994		76.0738		Observed	e0	LC	SWE	Observed
all-cause (direct)	Sweden	Men	1995		76.1742		Observed	e0	LC	SWE	Observed
all-cause (direct)	Sweden	Men	1996		76.5134		Observed	e0	LC	SWE	Observed
all-cause (direct)	Sweden	Men	1997		76.6994		Observed	e0	LC	SWE	Observed
all-cause (direct)	Sweden	Men	1998		76.8681		Observed	e0	LC	SWE	Observed
all-cause (direct)	Sweden	Men	1999		77.0674		Observed	e0	LC	SWE	Observed
all-cause (direct)	Sweden	Men	2000		77.3736		Observed	e0	LC	SWE	Observed
all-cause (direct)	Sweden	Men	2001		77.538		Observed	e0	LC	SWE	Observed
all-cause (direct)	Sweden	Men	2002		77.7103		Observed	e0	LC	SWE	Observed
all-cause (direct)	Sweden	Men	2003		77.901		Observed	e0	LC	SWE	Observed
all-cause (direct)	Sweden	Men	2004		78.3492		Observed	e0	LC	SWE	Observed
all-cause (direct)	Sweden	Men	2005		78.4238		Observed	e0	LC	SWE	Observed
all-cause (direct)	Sweden	Men	2006		78.6918		Observed	e0	LC	SWE	Observed
all-cause (direct)	Sweden	Men	2007		78.9236		Observed	e0	LC	SWE	Observed
all-cause (direct)	Sweden	Men	2008		79.0923		Observed	e0	LC	SWE	Observed
all-cause (direct)	Sweden	Men	2009		79.3336		Observed	e0	LC	SWE	Observed
all-cause (direct)	Sweden	Men	2010		79.516		Observed	e0	LC	SWE	Observed
all-cause (direct)	Sweden	Men	2011		79.7951		Observed	e0	LC	SWE	Observed
all-cause (direct)	Sweden	Men	2012		79.8657		Observed	e0	LC	SWE	Observed
all-cause (direct)	Sweden	Men	2013		80.1003		Observed	e0	LC	SWE	Observed
all-cause (direct)	Sweden	Men	2014		80.35		Observed	e0	LC	SWE	Observed
all-cause (direct)	Sweden	Men	2015	80.4606	80.8134	81.1622	Projected	e0	LC	SWE	Lee-Carter projection
all-cause (direct)	Sweden	Men	2016	80.5762	81.0097	81.433	Projected	e0	LC	SWE	Lee-Carter projection
all-cause (direct)	Sweden	Men	2017	80.7101	81.204	81.6876	Projected	e0	LC	SWE	Lee-Carter projection
all-cause (direct)	Sweden	Men	2018	80.8501	81.3957	81.9305	Projected	e0	LC	SWE	Lee-Carter projection
all-cause (direct)	Sweden	Men	2019	80.9901	81.5864	82.1664	Projected	e0	LC	SWE	Lee-Carter projection
all-cause (direct)	Sweden	Men	2020	81.1383	81.7735	82.3942	Projected	e0	LC	SWE	Lee-Carter projection
all-cause (direct)	Sweden	Men	2021	81.2821	81.9614	82.6175	Projected	e0	LC	SWE	Lee-Carter projection
all-cause (direct)	Sweden	Men	2022	81.4352	82.1456	82.8313	Projected	e0	LC	SWE	Lee-Carter projection
all-cause (direct)	Sweden	Men	2023	81.5884	82.3258	83.0403	Projected	e0	LC	SWE	Lee-Carter projection
all-cause (direct)	Sweden	Men	2024	81.7417	82.508	83.2433	Projected	e0	LC	SWE	Lee-Carter projection
all-cause (direct)	Sweden	Men	2025	81.8939	82.6863	83.4451	Projected	e0	LC	SWE	Lee-Carter projection
all-cause (direct)	Sweden	Men	2026	82.0444	82.864	83.6452	Projected	e0	LC	SWE	Lee-Carter projection
all-cause (direct)	Sweden	Men	2027	82.1956	83.0381	83.8457	Projected	e0	LC	SWE	Lee-Carter projection
all-cause (direct)	Sweden	Men	2028	82.3458	83.2137	84.035	Projected	e0	LC	SWE	Lee-Carter projection
all-cause (direct)	Sweden	Men	2029	82.4988	83.3852	84.2205	Projected	e0	LC	SWE	Lee-Carter projection
all-cause (direct)	Sweden	Men	2030	82.6416	83.5523	84.4069	Projected	e0	LC	SWE	Lee-Carter projection
all-cause (direct)	Sweden	Men	2031	82.7944	83.7196	84.5884	Projected	e0	LC	SWE	Lee-Carter projection
all-cause (direct)	Sweden	Men	2032	82.9416	83.8835	84.7666	Projected	e0	LC	SWE	Lee-Carter projection
all-cause (direct)	Sweden	Men	2033	83.0929	84.0492	84.9401	Projected	e0	LC	SWE	Lee-Carter projection
all-cause (direct)	Sweden	Men	2034	83.2465	84.2087	85.1115	Projected	e0	LC	SWE	Lee-Carter projection
all-cause (direct)	Sweden	Men	2035	83.3876	84.3703	85.2806	Projected	e0	LC	SWE	Lee-Carter projection
all-cause (direct)	Sweden	Men	2036	83.5399	84.5274	85.4445	Projected	e0	LC	SWE	Lee-Carter projection
all-cause (direct)	Sweden	Men	2037	83.6806	84.6823	85.6095	Projected	e0	LC	SWE	Lee-Carter projection
all-cause (direct)	Sweden	Men	2038	83.8252	84.8356	85.7707	Projected	e0	LC	SWE	Lee-Carter projection
all-cause (direct)	Sweden	Men	2039	83.9681	84.9897	85.9291	Projected	e0	LC	SWE	Lee-Carter projection
all-cause (direct)	Sweden	Men	2040	84.1117	85.1415	86.0819	Projected	e0	LC	SWE	Lee-Carter projection
all-cause (direct)	Sweden	Men	2041	84.247	85.2904	86.2321	Projected	e0	LC	SWE	Lee-Carter projection
all-cause (direct)	Sweden	Men	2042	84.3893	85.44	86.386	Projected	e0	LC	SWE	Lee-Carter projection
all-cause (direct)	Sweden	Men	2043	84.5291	85.5824	86.5399	Projected	e0	LC	SWE	Lee-Carter projection
all-cause (direct)	Sweden	Men	2044	84.6737	85.7272	86.6878	Projected	e0	LC	SWE	Lee-Carter projection
all-cause (direct)	Sweden	Men	2045	84.8121	85.8703	86.8315	Projected	e0	LC	SWE	Lee-Carter projection
all-cause (direct)	Sweden	Men	2046	84.9465	86.0076	86.9738	Projected	e0	LC	SWE	Lee-Carter projection
all-cause (direct)	Sweden	Men	2047	85.0757	86.1447	87.114	Projected	e0	LC	SWE	Lee-Carter projection
all-cause (direct)	Sweden	Men	2048	85.2089	86.2832	87.2506	Projected	e0	LC	SWE	Lee-Carter projection
all-cause (direct)	Sweden	Men	2049	85.3468	86.4173	87.3866	Projected	e0	LC	SWE	Lee-Carter projection
all-cause (direct)	Sweden	Men	2050	85.4836	86.5503	87.527	Projected	e0	LC	SWE	Lee-Carter projection
all-cause (direct)	Sweden	Men	2051	85.6122	86.6846	87.6604	Projected	e0	LC	SWE	Lee-Carter projection
all-cause (direct)	Sweden	Men	2052	85.7446	86.814	87.7919	Projected	e0	LC	SWE	Lee-Carter projection
all-cause (direct)	Sweden	Men	2053	85.8675	86.9413	87.9223	Projected	e0	LC	SWE	Lee-Carter projection
all-cause (direct)	Sweden	Men	2054	85.9927	87.0705	88.042	Projected	e0	LC	SWE	Lee-Carter projection
all-cause (direct)	Sweden	Men	2055	86.1183	87.1977	88.1663	Projected	e0	LC	SWE	Lee-Carter projection
all-cause (direct)	Sweden	Men	2056	86.2464	87.3214	88.2877	Projected	e0	LC	SWE	Lee-Carter projection
all-cause (direct)	Sweden	Men	2057	86.365	87.4451	88.4097	Projected	e0	LC	SWE	Lee-Carter projection
all-cause (direct)	Sweden	Men	2058	86.4912	87.566	88.529	Projected	e0	LC	SWE	Lee-Carter projection
all-cause (direct)	Sweden	Men	2059	86.6139	87.6838	88.6463	Projected	e0	LC	SWE	Lee-Carter projection
all-cause (direct)	Sweden	Men	2060	86.7354	87.8054	88.7659	Projected	e0	LC	SWE	Lee-Carter projection
all-cause (direct)	Sweden	Men	2061	86.8524	87.9225	88.8816	Projected	e0	LC	SWE	Lee-Carter projection
all-cause (direct)	Sweden	Men	2062	86.9747	88.0373	88.9927	Projected	e0	LC	SWE	Lee-Carter projection
all-cause (direct)	Sweden	Men	2063	87.0902	88.1503	89.1069	Projected	e0	LC	SWE	Lee-Carter projection
all-cause (direct)	Sweden	Men	2064	87.2044	88.2617	89.2166	Projected	e0	LC	SWE	Lee-Carter projection
all-cause (direct)	Sweden	Men	2065	87.3152	88.3734	89.3252	Projected	e0	LC	SWE	Lee-Carter projection
all-cause (indirect)	Sweden	Men	2015	80.4603	81.0507	81.6034	Projected	e0	LL	SWE	Our projection
all-cause (indirect)	Sweden	Men	2016	80.561	81.2832	81.9447	Projected	e0	LL	SWE	Our projection
all-cause (indirect)	Sweden	Men	2017	80.8886	81.6844	82.4106	Projected	e0	LL	SWE	Our projection
all-cause (indirect)	Sweden	Men	2018	81.0392	81.9079	82.6937	Projected	e0	LL	SWE	Our projection
all-cause (indirect)	Sweden	Men	2019	81.1943	82.1408	82.9869	Projected	e0	LL	SWE	Our projection
all-cause (indirect)	Sweden	Men	2020	81.3826	82.3715	83.261	Projected	e0	LL	SWE	Our projection
all-cause (indirect)	Sweden	Men	2021	81.552	82.6029	83.5374	Projected	e0	LL	SWE	Our projection
all-cause (indirect)	Sweden	Men	2022	81.7347	82.8286	83.806	Projected	e0	LL	SWE	Our projection
all-cause (indirect)	Sweden	Men	2023	81.9083	83.0559	84.06	Projected	e0	LL	SWE	Our projection
all-cause (indirect)	Sweden	Men	2024	82.082	83.2783	84.3189	Projected	e0	LL	SWE	Our projection
all-cause (indirect)	Sweden	Men	2025	82.2782	83.5021	84.5678	Projected	e0	LL	SWE	Our projection
all-cause (indirect)	Sweden	Men	2026	82.4708	83.7208	84.8189	Projected	e0	LL	SWE	Our projection
all-cause (indirect)	Sweden	Men	2027	82.6482	83.9383	85.0522	Projected	e0	LL	SWE	Our projection
all-cause (indirect)	Sweden	Men	2028	82.8354	84.1528	85.2895	Projected	e0	LL	SWE	Our projection
all-cause (indirect)	Sweden	Men	2029	83.029	84.3623	85.5211	Projected	e0	LL	SWE	Our projection
all-cause (indirect)	Sweden	Men	2030	83.1952	84.5732	85.7427	Projected	e0	LL	SWE	Our projection
all-cause (indirect)	Sweden	Men	2031	83.3867	84.7778	85.9702	Projected	e0	LL	SWE	Our projection
all-cause (indirect)	Sweden	Men	2032	83.5773	84.9838	86.189	Projected	e0	LL	SWE	Our projection
[truncated: 2,573 more rows]
