# Supplementary material for: Future life expectancy in Europe taking into account the impact of smoking, obesity, and alcohol
Source: eLife. 2021 Jul 6;10:e66590. doi: 10.7554/eLife.66590 (PMC8337079; doi:10.7554/eLife.66590)
Supplement: Figure 3—figure supplement 3—source data 1. [file elife-66590-fig3-figsupp3-data1.xlsx]

## Sheet: data
lifestyle	country	sex	year	lower95	median	upper95	method	type	model	HMD_code
All-cause mortality	Austria	Men	1990		72.226		Observed	e0	LC	AUT
All-cause mortality	Austria	Men	1991		72.2614		Observed	e0	LC	AUT
All-cause mortality	Austria	Men	1992		72.5066		Observed	e0	LC	AUT
All-cause mortality	Austria	Men	1993		72.7598		Observed	e0	LC	AUT
All-cause mortality	Austria	Men	1994		73.1152		Observed	e0	LC	AUT
All-cause mortality	Austria	Men	1995		73.2937		Observed	e0	LC	AUT
All-cause mortality	Austria	Men	1996		73.6596		Observed	e0	LC	AUT
All-cause mortality	Austria	Men	1997		74.0153		Observed	e0	LC	AUT
All-cause mortality	Austria	Men	1998		74.4407		Observed	e0	LC	AUT
All-cause mortality	Austria	Men	1999		74.7757		Observed	e0	LC	AUT
All-cause mortality	Austria	Men	2000		75.0937		Observed	e0	LC	AUT
All-cause mortality	Austria	Men	2001		75.5877		Observed	e0	LC	AUT
All-cause mortality	Austria	Men	2002		75.7732		Observed	e0	LC	AUT
All-cause mortality	Austria	Men	2003		75.9121		Observed	e0	LC	AUT
All-cause mortality	Austria	Men	2004		76.3892		Observed	e0	LC	AUT
All-cause mortality	Austria	Men	2005		76.6179		Observed	e0	LC	AUT
All-cause mortality	Austria	Men	2006		77.0736		Observed	e0	LC	AUT
All-cause mortality	Austria	Men	2007		77.2896		Observed	e0	LC	AUT
All-cause mortality	Austria	Men	2008		77.5835		Observed	e0	LC	AUT
All-cause mortality	Austria	Men	2009		77.3954		Observed	e0	LC	AUT
All-cause mortality	Austria	Men	2010		77.6562		Observed	e0	LC	AUT
All-cause mortality	Austria	Men	2011		78.0773		Observed	e0	LC	AUT
All-cause mortality	Austria	Men	2012		78.2584		Observed	e0	LC	AUT
All-cause mortality	Austria	Men	2013		78.4558		Observed	e0	LC	AUT
All-cause mortality	Austria	Men	2014	78.8239	79.133	79.4383	Projected	e0	LC	AUT
All-cause mortality	Austria	Men	2014		78.9134		Observed	e0	LC	AUT
All-cause mortality	Austria	Men	2015	78.9409	79.3802	79.805	Projected	e0	LC	AUT
All-cause mortality	Austria	Men	2016	79.0885	79.623	80.1353	Projected	e0	LC	AUT
All-cause mortality	Austria	Men	2017	79.2521	79.8624	80.4485	Projected	e0	LC	AUT
All-cause mortality	Austria	Men	2018	79.42	80.0997	80.7544	Projected	e0	LC	AUT
All-cause mortality	Austria	Men	2019	79.5997	80.3327	81.0467	Projected	e0	LC	AUT
All-cause mortality	Austria	Men	2020	79.7836	80.5688	81.3278	Projected	e0	LC	AUT
All-cause mortality	Austria	Men	2021	79.969	80.7997	81.5979	Projected	e0	LC	AUT
All-cause mortality	Austria	Men	2022	80.151	81.0284	81.8764	Projected	e0	LC	AUT
All-cause mortality	Austria	Men	2023	80.3414	81.2556	82.1401	Projected	e0	LC	AUT
All-cause mortality	Austria	Men	2024	80.538	81.4784	82.3922	Projected	e0	LC	AUT
All-cause mortality	Austria	Men	2025	80.7294	81.7017	82.6402	Projected	e0	LC	AUT
All-cause mortality	Austria	Men	2026	80.9145	81.9231	82.8885	Projected	e0	LC	AUT
All-cause mortality	Austria	Men	2027	81.1003	82.1413	83.1344	Projected	e0	LC	AUT
All-cause mortality	Austria	Men	2028	81.2864	82.3546	83.372	Projected	e0	LC	AUT
All-cause mortality	Austria	Men	2029	81.4673	82.5674	83.6138	Projected	e0	LC	AUT
All-cause mortality	Austria	Men	2030	81.656	82.7818	83.8369	Projected	e0	LC	AUT
All-cause mortality	Austria	Men	2031	81.8452	82.9939	84.0693	Projected	e0	LC	AUT
All-cause mortality	Austria	Men	2032	82.0388	83.1997	84.2894	Projected	e0	LC	AUT
All-cause mortality	Austria	Men	2033	82.2238	83.4055	84.5128	Projected	e0	LC	AUT
All-cause mortality	Austria	Men	2034	82.4102	83.6063	84.7302	Projected	e0	LC	AUT
All-cause mortality	Austria	Men	2035	82.5953	83.8077	84.944	Projected	e0	LC	AUT
All-cause mortality	Austria	Men	2036	82.7747	84.0047	85.1547	Projected	e0	LC	AUT
All-cause mortality	Austria	Men	2037	82.9606	84.2048	85.3615	Projected	e0	LC	AUT
All-cause mortality	Austria	Men	2038	83.1394	84.396	85.5642	Projected	e0	LC	AUT
All-cause mortality	Austria	Men	2039	83.3221	84.588	85.7711	Projected	e0	LC	AUT
All-cause mortality	Austria	Men	2040	83.5016	84.7797	85.9659	Projected	e0	LC	AUT
All-cause mortality	Austria	Men	2041	83.6803	84.9648	86.1627	Projected	e0	LC	AUT
All-cause mortality	Austria	Men	2042	83.8505	85.1499	86.3582	Projected	e0	LC	AUT
All-cause mortality	Austria	Men	2043	84.0285	85.3349	86.5429	Projected	e0	LC	AUT
All-cause mortality	Austria	Men	2044	84.2025	85.5172	86.7348	Projected	e0	LC	AUT
All-cause mortality	Austria	Men	2045	84.3742	85.6962	86.9185	Projected	e0	LC	AUT
All-cause mortality	Austria	Men	2046	84.5428	85.8736	87.098	Projected	e0	LC	AUT
All-cause mortality	Austria	Men	2047	84.7217	86.0516	87.2855	Projected	e0	LC	AUT
All-cause mortality	Austria	Men	2048	84.891	86.2248	87.4615	Projected	e0	LC	AUT
All-cause mortality	Austria	Men	2049	85.0562	86.398	87.6424	Projected	e0	LC	AUT
All-cause mortality	Austria	Men	2050	85.2203	86.5689	87.8128	Projected	e0	LC	AUT
All-cause mortality	Austria	Men	2051	85.3855	86.7374	87.9811	Projected	e0	LC	AUT
All-cause mortality	Austria	Men	2052	85.5392	86.9037	88.147	Projected	e0	LC	AUT
All-cause mortality	Austria	Men	2053	85.7037	87.0683	88.3075	Projected	e0	LC	AUT
All-cause mortality	Austria	Men	2054	85.8682	87.2297	88.4754	Projected	e0	LC	AUT
All-cause mortality	Austria	Men	2055	86.0233	87.3931	88.6374	Projected	e0	LC	AUT
All-cause mortality	Austria	Men	2056	86.1784	87.5509	88.7911	Projected	e0	LC	AUT
All-cause mortality	Austria	Men	2057	86.3436	87.7111	88.9481	Projected	e0	LC	AUT
All-cause mortality	Austria	Men	2058	86.4953	87.8639	89.1002	Projected	e0	LC	AUT
All-cause mortality	Austria	Men	2059	86.6401	88.0173	89.2554	Projected	e0	LC	AUT
All-cause mortality	Austria	Men	2060	86.7999	88.17	89.4043	Projected	e0	LC	AUT
All-cause mortality	Austria	Men	2061	86.9567	88.3238	89.549	Projected	e0	LC	AUT
All-cause mortality	Austria	Men	2062	87.0985	88.4728	89.7006	Projected	e0	LC	AUT
All-cause mortality	Austria	Men	2063	87.2521	88.6184	89.8472	Projected	e0	LC	AUT
All-cause mortality	Austria	Men	2064	87.4007	88.7634	89.9896	Projected	e0	LC	AUT
All-cause mortality	Austria	Men	2065	87.5468	88.9062	90.1252	Projected	e0	LC	AUT
Non-lifestyle attributable mortality	Austria	Men	1990		77.6666		Observed	e0	LC	AUT
Non-lifestyle attributable mortality	Austria	Men	1991		77.7683		Observed	e0	LC	AUT
Non-lifestyle attributable mortality	Austria	Men	1992		77.8561		Observed	e0	LC	AUT
Non-lifestyle attributable mortality	Austria	Men	1993		78.1723		Observed	e0	LC	AUT
Non-lifestyle attributable mortality	Austria	Men	1994		78.3283		Observed	e0	LC	AUT
Non-lifestyle attributable mortality	Austria	Men	1995		78.4402		Observed	e0	LC	AUT
Non-lifestyle attributable mortality	Austria	Men	1996		78.7777		Observed	e0	LC	AUT
Non-lifestyle attributable mortality	Austria	Men	1997		78.9654		Observed	e0	LC	AUT
Non-lifestyle attributable mortality	Austria	Men	1998		79.3225		Observed	e0	LC	AUT
Non-lifestyle attributable mortality	Austria	Men	1999		79.4349		Observed	e0	LC	AUT
Non-lifestyle attributable mortality	Austria	Men	2000		79.6988		Observed	e0	LC	AUT
Non-lifestyle attributable mortality	Austria	Men	2001		80.0613		Observed	e0	LC	AUT
Non-lifestyle attributable mortality	Austria	Men	2002		80.2515		Observed	e0	LC	AUT
Non-lifestyle attributable mortality	Austria	Men	2003		80.2708		Observed	e0	LC	AUT
Non-lifestyle attributable mortality	Austria	Men	2004		80.6987		Observed	e0	LC	AUT
Non-lifestyle attributable mortality	Austria	Men	2005		80.8669		Observed	e0	LC	AUT
Non-lifestyle attributable mortality	Austria	Men	2006		81.2394		Observed	e0	LC	AUT
Non-lifestyle attributable mortality	Austria	Men	2007		81.3147		Observed	e0	LC	AUT
Non-lifestyle attributable mortality	Austria	Men	2008		81.5889		Observed	e0	LC	AUT
Non-lifestyle attributable mortality	Austria	Men	2009		81.4841		Observed	e0	LC	AUT
Non-lifestyle attributable mortality	Austria	Men	2010		81.6834		Observed	e0	LC	AUT
Non-lifestyle attributable mortality	Austria	Men	2011		81.9904		Observed	e0	LC	AUT
Non-lifestyle attributable mortality	Austria	Men	2012		82.1073		Observed	e0	LC	AUT
Non-lifestyle attributable mortality	Austria	Men	2013		82.3095		Observed	e0	LC	AUT
Non-lifestyle attributable mortality	Austria	Men	2014	82.6359	82.888	83.1346	Projected	e0	LC	AUT
Non-lifestyle attributable mortality	Austria	Men	2014		82.7157		Observed	e0	LC	AUT
Non-lifestyle attributable mortality	Austria	Men	2015	82.7188	83.0697	83.416	Projected	e0	LC	AUT
Non-lifestyle attributable mortality	Austria	Men	2016	82.8218	83.2517	83.6685	Projected	e0	LC	AUT
Non-lifestyle attributable mortality	Austria	Men	2017	82.9406	83.4297	83.9045	Projected	e0	LC	AUT
Non-lifestyle attributable mortality	Austria	Men	2018	83.0628	83.6073	84.134	Projected	e0	LC	AUT
Non-lifestyle attributable mortality	Austria	Men	2019	83.1892	83.7829	84.3566	Projected	e0	LC	AUT
Non-lifestyle attributable mortality	Austria	Men	2020	83.327	83.9573	84.5695	Projected	e0	LC	AUT
Non-lifestyle attributable mortality	Austria	Men	2021	83.4579	84.13	84.7778	Projected	e0	LC	AUT
Non-lifestyle attributable mortality	Austria	Men	2022	83.5876	84.2971	84.9775	Projected	e0	LC	AUT
Non-lifestyle attributable mortality	Austria	Men	2023	83.7274	84.4668	85.1759	Projected	e0	LC	AUT
Non-lifestyle attributable mortality	Austria	Men	2024	83.8634	84.6344	85.3713	Projected	e0	LC	AUT
Non-lifestyle attributable mortality	Austria	Men	2025	84.0037	84.8012	85.5616	Projected	e0	LC	AUT
Non-lifestyle attributable mortality	Austria	Men	2026	84.1484	84.9641	85.7517	Projected	e0	LC	AUT
Non-lifestyle attributable mortality	Austria	Men	2027	84.2819	85.1286	85.9381	Projected	e0	LC	AUT
Non-lifestyle attributable mortality	Austria	Men	2028	84.4266	85.2902	86.118	Projected	e0	LC	AUT
Non-lifestyle attributable mortality	Austria	Men	2029	84.5646	85.4482	86.2898	Projected	e0	LC	AUT
Non-lifestyle attributable mortality	Austria	Men	2030	84.7086	85.6078	86.4624	Projected	e0	LC	AUT
Non-lifestyle attributable mortality	Austria	Men	2031	84.8433	85.7641	86.6373	Projected	e0	LC	AUT
Non-lifestyle attributable mortality	Austria	Men	2032	84.9822	85.9162	86.8064	Projected	e0	LC	AUT
Non-lifestyle attributable mortality	Austria	Men	2033	85.119	86.0737	86.9728	Projected	e0	LC	AUT
Non-lifestyle attributable mortality	Austria	Men	2034	85.2591	86.2263	87.1343	Projected	e0	LC	AUT
Non-lifestyle attributable mortality	Austria	Men	2035	85.3954	86.3751	87.2974	Projected	e0	LC	AUT
Non-lifestyle attributable mortality	Austria	Men	2036	85.532	86.5244	87.4582	Projected	e0	LC	AUT
Non-lifestyle attributable mortality	Austria	Men	2037	85.6677	86.6723	87.6149	Projected	e0	LC	AUT
Non-lifestyle attributable mortality	Austria	Men	2038	85.7982	86.8165	87.7725	Projected	e0	LC	AUT
Non-lifestyle attributable mortality	Austria	Men	2039	85.9309	86.9633	87.924	Projected	e0	LC	AUT
Non-lifestyle attributable mortality	Austria	Men	2040	86.0637	87.1073	88.0813	Projected	e0	LC	AUT
Non-lifestyle attributable mortality	Austria	Men	2041	86.193	87.2479	88.2277	Projected	e0	LC	AUT
Non-lifestyle attributable mortality	Austria	Men	2042	86.3259	87.3909	88.3713	Projected	e0	LC	AUT
Non-lifestyle attributable mortality	Austria	Men	2043	86.4614	87.5291	88.5194	Projected	e0	LC	AUT
Non-lifestyle attributable mortality	Austria	Men	2044	86.5896	87.6667	88.6649	Projected	e0	LC	AUT
Non-lifestyle attributable mortality	Austria	Men	2045	86.7166	87.8025	88.8091	Projected	e0	LC	AUT
Non-lifestyle attributable mortality	Austria	Men	2046	86.8388	87.9416	88.946	Projected	e0	LC	AUT
Non-lifestyle attributable mortality	Austria	Men	2047	86.9723	88.0759	89.0892	Projected	e0	LC	AUT
Non-lifestyle attributable mortality	Austria	Men	2048	87.1043	88.209	89.2271	Projected	e0	LC	AUT
Non-lifestyle attributable mortality	Austria	Men	2049	87.2274	88.3398	89.3555	Projected	e0	LC	AUT
Non-lifestyle attributable mortality	Austria	Men	2050	87.3514	88.4688	89.4874	Projected	e0	LC	AUT
Non-lifestyle attributable mortality	Austria	Men	2051	87.4828	88.5991	89.6162	Projected	e0	LC	AUT
Non-lifestyle attributable mortality	Austria	Men	2052	87.6078	88.7258	89.7471	Projected	e0	LC	AUT
Non-lifestyle attributable mortality	Austria	Men	2053	87.7349	88.8536	89.8861	Projected	e0	LC	AUT
Non-lifestyle attributable mortality	Austria	Men	2054	87.8529	88.9773	90.0105	Projected	e0	LC	AUT
Non-lifestyle attributable mortality	Austria	Men	2055	87.9713	89.1016	90.1287	Projected	e0	LC	AUT
Non-lifestyle attributable mortality	Austria	Men	2056	88.0909	89.2266	90.2506	Projected	e0	LC	AUT
Non-lifestyle attributable mortality	Austria	Men	2057	88.2071	89.3464	90.3778	Projected	e0	LC	AUT
Non-lifestyle attributable mortality	Austria	Men	2058	88.3251	89.4679	90.5026	Projected	e0	LC	AUT
Non-lifestyle attributable mortality	Austria	Men	2059	88.4416	89.5868	90.6199	Projected	e0	LC	AUT
Non-lifestyle attributable mortality	Austria	Men	2060	88.5538	89.7028	90.7345	Projected	e0	LC	AUT
Non-lifestyle attributable mortality	Austria	Men	2061	88.6713	89.819	90.8552	Projected	e0	LC	AUT
Non-lifestyle attributable mortality	Austria	Men	2062	88.7865	89.9361	90.9762	Projected	e0	LC	AUT
Non-lifestyle attributable mortality	Austria	Men	2063	88.9028	90.0501	91.0903	Projected	e0	LC	AUT
Non-lifestyle attributable mortality	Austria	Men	2064	89.0099	90.1633	91.2021	Projected	e0	LC	AUT
Non-lifestyle attributable mortality	Austria	Men	2065	89.1291	90.2763	91.3114	Projected	e0	LC	AUT
Lifestyle + non-lifestyle attributable mortality	Austria	Men	1990		72.226		Observed	e0	LC	AUT
Lifestyle + non-lifestyle attributable mortality	Austria	Men	1991		72.2614		Observed	e0	LC	AUT
Lifestyle + non-lifestyle attributable mortality	Austria	Men	1992		72.5066		Observed	e0	LC	AUT
Lifestyle + non-lifestyle attributable mortality	Austria	Men	1993		72.7598		Observed	e0	LC	AUT
Lifestyle + non-lifestyle attributable mortality	Austria	Men	1994		73.1152		Observed	e0	LC	AUT
Lifestyle + non-lifestyle attributable mortality	Austria	Men	1995		73.2937		Observed	e0	LC	AUT
Lifestyle + non-lifestyle attributable mortality	Austria	Men	1996		73.6596		Observed	e0	LC	AUT
Lifestyle + non-lifestyle attributable mortality	Austria	Men	1997		74.0153		Observed	e0	LC	AUT
Lifestyle + non-lifestyle attributable mortality	Austria	Men	1998		74.4407		Observed	e0	LC	AUT
Lifestyle + non-lifestyle attributable mortality	Austria	Men	1999		74.7757		Observed	e0	LC	AUT
Lifestyle + non-lifestyle attributable mortality	Austria	Men	2000		75.0937		Observed	e0	LC	AUT
Lifestyle + non-lifestyle attributable mortality	Austria	Men	2001		75.5877		Observed	e0	LC	AUT
Lifestyle + non-lifestyle attributable mortality	Austria	Men	2002		75.7732		Observed	e0	LC	AUT
Lifestyle + non-lifestyle attributable mortality	Austria	Men	2003		75.9121		Observed	e0	LC	AUT
Lifestyle + non-lifestyle attributable mortality	Austria	Men	2004		76.3892		Observed	e0	LC	AUT
Lifestyle + non-lifestyle attributable mortality	Austria	Men	2005		76.6179		Observed	e0	LC	AUT
Lifestyle + non-lifestyle attributable mortality	Austria	Men	2006		77.0736		Observed	e0	LC	AUT
Lifestyle + non-lifestyle attributable mortality	Austria	Men	2007		77.2896		Observed	e0	LC	AUT
Lifestyle + non-lifestyle attributable mortality	Austria	Men	2008		77.5835		Observed	e0	LC	AUT
Lifestyle + non-lifestyle attributable mortality	Austria	Men	2009		77.3954		Observed	e0	LC	AUT
Lifestyle + non-lifestyle attributable mortality	Austria	Men	2010		77.6562		Observed	e0	LC	AUT
Lifestyle + non-lifestyle attributable mortality	Austria	Men	2011		78.0773		Observed	e0	LC	AUT
Lifestyle + non-lifestyle attributable mortality	Austria	Men	2012		78.2584		Observed	e0	LC	AUT
Lifestyle + non-lifestyle attributable mortality	Austria	Men	2013		78.4558		Observed	e0	LC	AUT
Lifestyle + non-lifestyle attributable mortality	Austria	Men	2014		78.9134		Observed	e0	LC	AUT
Lifestyle + non-lifestyle attributable mortality	Austria	Men	2015	79.0001	79.4658	79.9172	Projected	e0	LC	AUT
Lifestyle + non-lifestyle attributable mortality	Austria	Men	2016	79.1623	79.715	80.2449	Projected	e0	LC	AUT
Lifestyle + non-lifestyle attributable mortality	Austria	Men	2017	79.3418	79.9553	80.5509	Projected	e0	LC	AUT
Lifestyle + non-lifestyle attributable mortality	Austria	Men	2018	79.5203	80.1962	80.8543	Projected	e0	LC	AUT
Lifestyle + non-lifestyle attributable mortality	Austria	Men	2019	79.7053	80.4361	81.1462	Projected	e0	LC	AUT
Lifestyle + non-lifestyle attributable mortality	Austria	Men	2020	79.8916	80.6753	81.4317	Projected	e0	LC	AUT
Lifestyle + non-lifestyle attributable mortality	Austria	Men	2021	80.0843	80.9083	81.7054	Projected	e0	LC	AUT
Lifestyle + non-lifestyle attributable mortality	Austria	Men	2022	80.2694	81.1378	81.966	Projected	e0	LC	AUT
Lifestyle + non-lifestyle attributable mortality	Austria	Men	2023	80.4651	81.3657	82.2319	Projected	e0	LC	AUT
Lifestyle + non-lifestyle attributable mortality	Austria	Men	2024	80.653	81.5927	82.4834	Projected	e0	LC	AUT
Lifestyle + non-lifestyle attributable mortality	Austria	Men	2025	80.8437	81.8143	82.7428	Projected	e0	LC	AUT
Lifestyle + non-lifestyle attributable mortality	Austria	Men	2026	81.0374	82.0347	82.9863	Projected	e0	LC	AUT
Lifestyle + non-lifestyle attributable mortality	Austria	Men	2027	81.2311	82.251	83.2261	Projected	e0	LC	AUT
Lifestyle + non-lifestyle attributable mortality	Austria	Men	2028	81.4154	82.4644	83.459	Projected	e0	LC	AUT
Lifestyle + non-lifestyle attributable mortality	Austria	Men	2029	81.604	82.6751	83.6975	Projected	e0	LC	AUT
Lifestyle + non-lifestyle attributable mortality	Austria	Men	2030	81.7888	82.8847	83.9215	Projected	e0	LC	AUT
Lifestyle + non-lifestyle attributable mortality	Austria	Men	2031	81.9789	83.0909	84.1424	Projected	e0	LC	AUT
Lifestyle + non-lifestyle attributable mortality	Austria	Men	2032	82.1571	83.2925	84.367	Projected	e0	LC	AUT
Lifestyle + non-lifestyle attributable mortality	Austria	Men	2033	82.3376	83.495	84.5845	Projected	e0	LC	AUT
Lifestyle + non-lifestyle attributable mortality	Austria	Men	2034	82.5184	83.6955	84.797	Projected	e0	LC	AUT
Lifestyle + non-lifestyle attributable mortality	Austria	Men	2035	82.698	83.8915	85.0132	Projected	e0	LC	AUT
Lifestyle + non-lifestyle attributable mortality	Austria	Men	2036	82.8756	84.0913	85.2208	Projected	e0	LC	AUT
Lifestyle + non-lifestyle attributable mortality	Austria	Men	2037	83.0546	84.282	85.4291	Projected	e0	LC	AUT
Lifestyle + non-lifestyle attributable mortality	Austria	Men	2038	83.2301	84.4747	85.6294	Projected	e0	LC	AUT
Lifestyle + non-lifestyle attributable mortality	Austria	Men	2039	83.4011	84.6641	85.8261	Projected	e0	LC	AUT
Lifestyle + non-lifestyle attributable mortality	Austria	Men	2040	83.5777	84.8516	86.0258	Projected	e0	LC	AUT
Lifestyle + non-lifestyle attributable mortality	Austria	Men	2041	83.7588	85.039	86.2224	Projected	e0	LC	AUT
Lifestyle + non-lifestyle attributable mortality	Austria	Men	2042	83.9297	85.2244	86.4079	Projected	e0	LC	AUT
Lifestyle + non-lifestyle attributable mortality	Austria	Men	2043	84.0928	85.4058	86.5956	Projected	e0	LC	AUT
Lifestyle + non-lifestyle attributable mortality	Austria	Men	2044	84.2658	85.5845	86.7892	Projected	e0	LC	AUT
Lifestyle + non-lifestyle attributable mortality	Austria	Men	2045	84.4353	85.7641	86.9712	Projected	e0	LC	AUT
Lifestyle + non-lifestyle attributable mortality	Austria	Men	2046	84.6098	85.9458	87.1567	Projected	e0	LC	AUT
Lifestyle + non-lifestyle attributable mortality	Austria	Men	2047	84.7824	86.1221	87.3347	Projected	e0	LC	AUT
Lifestyle + non-lifestyle attributable mortality	Austria	Men	2048	84.9509	86.2969	87.5097	Projected	e0	LC	AUT
Lifestyle + non-lifestyle attributable mortality	Austria	Men	2049	85.1156	86.4679	87.6864	Projected	e0	LC	AUT
Lifestyle + non-lifestyle attributable mortality	Austria	Men	2050	85.2812	86.6369	87.8611	Projected	e0	LC	AUT
Lifestyle + non-lifestyle attributable mortality	Austria	Men	2051	85.4555	86.8086	88.0229	Projected	e0	LC	AUT
Lifestyle + non-lifestyle attributable mortality	Austria	Men	2052	85.624	86.9733	88.1971	Projected	e0	LC	AUT
Lifestyle + non-lifestyle attributable mortality	Austria	Men	2053	85.7908	87.1399	88.3674	Projected	e0	LC	AUT
Lifestyle + non-lifestyle attributable mortality	Austria	Men	2054	85.9511	87.3038	88.5323	Projected	e0	LC	AUT
Lifestyle + non-lifestyle attributable mortality	Austria	Men	2055	86.1111	87.4691	88.6928	Projected	e0	LC	AUT
Lifestyle + non-lifestyle attributable mortality	Austria	Men	2056	86.2729	87.633	88.855	Projected	e0	LC	AUT
Lifestyle + non-lifestyle attributable mortality	Austria	Men	2057	86.426	87.7936	89.013	Projected	e0	LC	AUT
Lifestyle + non-lifestyle attributable mortality	Austria	Men	2058	86.5847	87.9515	89.1727	Projected	e0	LC	AUT
Lifestyle + non-lifestyle attributable mortality	Austria	Men	2059	86.7368	88.1097	89.3277	Projected	e0	LC	AUT
Lifestyle + non-lifestyle attributable mortality	Austria	Men	2060	86.8961	88.2645	89.4795	Projected	e0	LC	AUT
Lifestyle + non-lifestyle attributable mortality	Austria	Men	2061	87.0551	88.4187	89.632	Projected	e0	LC	AUT
Lifestyle + non-lifestyle attributable mortality	Austria	Men	2062	87.2044	88.5712	89.7864	Projected	e0	LC	AUT
Lifestyle + non-lifestyle attributable mortality	Austria	Men	2063	87.3648	88.7219	89.9314	Projected	e0	LC	AUT
Lifestyle + non-lifestyle attributable mortality	Austria	Men	2064	87.5075	88.8711	90.0765	Projected	e0	LC	AUT
Lifestyle + non-lifestyle attributable mortality	Austria	Men	2065	87.6668	89.0181	90.2172	Projected	e0	LC	AUT
All-cause mortality	Belgium	Men	1990		72.6959		Observed	e0	LC	BEL
All-cause mortality	Belgium	Men	1991		72.8459		Observed	e0	LC	BEL
All-cause mortality	Belgium	Men	1992		72.9736		Observed	e0	LC	BEL
All-cause mortality	Belgium	Men	1993		72.94		Observed	e0	LC	BEL
All-cause mortality	Belgium	Men	1994		73.3489		Observed	e0	LC	BEL
All-cause mortality	Belgium	Men	1995		73.4316		Observed	e0	LC	BEL
All-cause mortality	Belgium	Men	1996		73.8299		Observed	e0	LC	BEL
All-cause mortality	Belgium	Men	1997		74.1561		Observed	e0	LC	BEL
All-cause mortality	Belgium	Men	1998		74.2954		Observed	e0	LC	BEL
All-cause mortality	Belgium	Men	1999		74.3633		Observed	e0	LC	BEL
All-cause mortality	Belgium	Men	2000		74.5643		Observed	e0	LC	BEL
All-cause mortality	Belgium	Men	2001		74.9174		Observed	e0	LC	BEL
All-cause mortality	Belgium	Men	2002		75.0788		Observed	e0	LC	BEL
All-cause mortality	Belgium	Men	2003		75.3583		Observed	e0	LC	BEL
All-cause mortality	Belgium	Men	2004		75.969		Observed	e0	LC	BEL
All-cause mortality	Belgium	Men	2005		76.1442		Observed	e0	LC	BEL
All-cause mortality	Belgium	Men	2006		76.5178		Observed	e0	LC	BEL
All-cause mortality	Belgium	Men	2007		76.7381		Observed	e0	LC	BEL
All-cause mortality	Belgium	Men	2008		76.769		Observed	e0	LC	BEL
All-cause mortality	Belgium	Men	2009		77.1593		Observed	e0	LC	BEL
All-cause mortality	Belgium	Men	2010		77.3748		Observed	e0	LC	BEL
All-cause mortality	Belgium	Men	2011		77.7662		Observed	e0	LC	BEL
All-cause mortality	Belgium	Men	2012		77.6319		Observed	e0	LC	BEL
All-cause mortality	Belgium	Men	2013		77.9477		Observed	e0	LC	BEL
All-cause mortality	Belgium	Men	2014	78.4131	78.7984	79.1714	Projected	e0	LC	BEL
All-cause mortality	Belgium	Men	2014		78.5727		Observed	e0	LC	BEL
All-cause mortality	Belgium	Men	2015	78.4782	79.0176	79.5523	Projected	e0	LC	BEL
All-cause mortality	Belgium	Men	2016	78.5718	79.2377	79.8817	Projected	e0	LC	BEL
All-cause mortality	Belgium	Men	2017	78.7017	79.4543	80.1904	Projected	e0	LC	BEL
All-cause mortality	Belgium	Men	2018	78.8286	79.6728	80.4837	Projected	e0	LC	BEL
All-cause mortality	Belgium	Men	2019	78.9685	79.8858	80.7631	Projected	e0	LC	BEL
All-cause mortality	Belgium	Men	2020	79.1182	80.0955	81.0299	Projected	e0	LC	BEL
All-cause mortality	Belgium	Men	2021	79.2644	80.3045	81.2965	Projected	e0	LC	BEL
All-cause mortality	Belgium	Men	2022	79.4175	80.5128	81.5544	Projected	e0	LC	BEL
All-cause mortality	Belgium	Men	2023	79.5741	80.7189	81.8071	Projected	e0	LC	BEL
All-cause mortality	Belgium	Men	2024	79.7208	80.9247	82.0486	Projected	e0	LC	BEL
All-cause mortality	Belgium	Men	2025	79.8799	81.1239	82.2804	Projected	e0	LC	BEL
All-cause mortality	Belgium	Men	2026	80.0436	81.3247	82.5155	Projected	e0	LC	BEL
All-cause mortality	Belgium	Men	2027	80.2025	81.5242	82.7404	Projected	e0	LC	BEL
All-cause mortality	Belgium	Men	2028	80.3708	81.721	82.9764	Projected	e0	LC	BEL
All-cause mortality	Belgium	Men	2029	80.5338	81.9159	83.1982	Projected	e0	LC	BEL
All-cause mortality	Belgium	Men	2030	80.6943	82.1074	83.4139	Projected	e0	LC	BEL
All-cause mortality	Belgium	Men	2031	80.8576	82.2981	83.6409	Projected	e0	LC	BEL
All-cause mortality	Belgium	Men	2032	81.0168	82.4889	83.8487	Projected	e0	LC	BEL
All-cause mortality	Belgium	Men	2033	81.1867	82.6721	84.0491	Projected	e0	LC	BEL
All-cause mortality	Belgium	Men	2034	81.3414	82.8566	84.2515	Projected	e0	LC	BEL
All-cause mortality	Belgium	Men	2035	81.5126	83.0406	84.4589	Projected	e0	LC	BEL
All-cause mortality	Belgium	Men	2036	81.6638	83.2248	84.6545	Projected	e0	LC	BEL
All-cause mortality	Belgium	Men	2037	81.8325	83.406	84.8535	Projected	e0	LC	BEL
All-cause mortality	Belgium	Men	2038	81.9919	83.5832	85.0444	Projected	e0	LC	BEL
All-cause mortality	Belgium	Men	2039	82.1503	83.763	85.2348	Projected	e0	LC	BEL
All-cause mortality	Belgium	Men	2040	82.3291	83.939	85.4164	Projected	e0	LC	BEL
All-cause mortality	Belgium	Men	2041	82.4758	84.1105	85.6056	Projected	e0	LC	BEL
All-cause mortality	Belgium	Men	2042	82.6272	84.2824	85.7881	Projected	e0	LC	BEL
All-cause mortality	Belgium	Men	2043	82.7809	84.4528	85.9669	Projected	e0	LC	BEL
All-cause mortality	Belgium	Men	2044	82.9407	84.618	86.1394	Projected	e0	LC	BEL
All-cause mortality	Belgium	Men	2045	83.0892	84.7876	86.3121	Projected	e0	LC	BEL
All-cause mortality	Belgium	Men	2046	83.2406	84.9551	86.4823	Projected	e0	LC	BEL
All-cause mortality	Belgium	Men	2047	83.3921	85.1155	86.6429	Projected	e0	LC	BEL
All-cause mortality	Belgium	Men	2048	83.5417	85.2775	86.8131	Projected	e0	LC	BEL
All-cause mortality	Belgium	Men	2049	83.7003	85.4356	86.9716	Projected	e0	LC	BEL
All-cause mortality	Belgium	Men	2050	83.8425	85.595	87.1332	Projected	e0	LC	BEL
All-cause mortality	Belgium	Men	2051	83.998	85.7502	87.2923	Projected	e0	LC	BEL
All-cause mortality	Belgium	Men	2052	84.1376	85.9048	87.4498	Projected	e0	LC	BEL
All-cause mortality	Belgium	Men	2053	84.2881	86.0585	87.6087	Projected	e0	LC	BEL
All-cause mortality	Belgium	Men	2054	84.4344	86.2091	87.7584	Projected	e0	LC	BEL
All-cause mortality	Belgium	Men	2055	84.5797	86.3608	87.9127	Projected	e0	LC	BEL
All-cause mortality	Belgium	Men	2056	84.7102	86.5059	88.0601	Projected	e0	LC	BEL
All-cause mortality	Belgium	Men	2057	84.8634	86.6535	88.2036	Projected	e0	LC	BEL
All-cause mortality	Belgium	Men	2058	85.013	86.7969	88.3496	Projected	e0	LC	BEL
All-cause mortality	Belgium	Men	2059	85.1536	86.9388	88.4907	Projected	e0	LC	BEL
All-cause mortality	Belgium	Men	2060	85.2944	87.0801	88.6334	Projected	e0	LC	BEL
All-cause mortality	Belgium	Men	2061	85.4313	87.2179	88.7663	Projected	e0	LC	BEL
All-cause mortality	Belgium	Men	2062	85.5754	87.3565	88.904	Projected	e0	LC	BEL
All-cause mortality	Belgium	Men	2063	85.7029	87.492	89.0391	Projected	e0	LC	BEL
All-cause mortality	Belgium	Men	2064	85.849	87.6283	89.1693	Projected	e0	LC	BEL
All-cause mortality	Belgium	Men	2065	85.9784	87.763	89.3023	Projected	e0	LC	BEL
Non-lifestyle attributable mortality	Belgium	Men	1990		78.7414		Observed	e0	LC	BEL
Non-lifestyle attributable mortality	Belgium	Men	1991		78.8537		Observed	e0	LC	BEL
Non-lifestyle attributable mortality	Belgium	Men	1992		79.0073		Observed	e0	LC	BEL
Non-lifestyle attributable mortality	Belgium	Men	1993		78.9343		Observed	e0	LC	BEL
Non-lifestyle attributable mortality	Belgium	Men	1994		79.2677		Observed	e0	LC	BEL
Non-lifestyle attributable mortality	Belgium	Men	1995		79.4568		Observed	e0	LC	BEL
Non-lifestyle attributable mortality	Belgium	Men	1996		79.5697		Observed	e0	LC	BEL
Non-lifestyle attributable mortality	Belgium	Men	1997		79.9		Observed	e0	LC	BEL
Non-lifestyle attributable mortality	Belgium	Men	1998		79.8145		Observed	e0	LC	BEL
Non-lifestyle attributable mortality	Belgium	Men	1999		79.7605		Observed	e0	LC	BEL
Non-lifestyle attributable mortality	Belgium	Men	2000		79.8558		Observed	e0	LC	BEL
Non-lifestyle attributable mortality	Belgium	Men	2001		80.2753		Observed	e0	LC	BEL
Non-lifestyle attributable mortality	Belgium	Men	2002		80.3302		Observed	e0	LC	BEL
Non-lifestyle attributable mortality	Belgium	Men	2003		80.4824		Observed	e0	LC	BEL
Non-lifestyle attributable mortality	Belgium	Men	2004		80.9661		Observed	e0	LC	BEL
Non-lifestyle attributable mortality	Belgium	Men	2005		81.2297		Observed	e0	LC	BEL
Non-lifestyle attributable mortality	Belgium	Men	2006		81.5526		Observed	e0	LC	BEL
Non-lifestyle attributable mortality	Belgium	Men	2007		81.6525		Observed	e0	LC	BEL
Non-lifestyle attributable mortality	Belgium	Men	2008		81.7635		Observed	e0	LC	BEL
Non-lifestyle attributable mortality	Belgium	Men	2009		82.0294		Observed	e0	LC	BEL
Non-lifestyle attributable mortality	Belgium	Men	2010		82.2332		Observed	e0	LC	BEL
Non-lifestyle attributable mortality	Belgium	Men	2011		82.4728		Observed	e0	LC	BEL
Non-lifestyle attributable mortality	Belgium	Men	2012		82.2015		Observed	e0	LC	BEL
Non-lifestyle attributable mortality	Belgium	Men	2013		82.3744		Observed	e0	LC	BEL
Non-lifestyle attributable mortality	Belgium	Men	2014	82.8023	83.1576	83.5047	Projected	e0	LC	BEL
Non-lifestyle attributable mortality	Belgium	Men	2014		82.9602		Observed	e0	LC	BEL
Non-lifestyle attributable mortality	Belgium	Men	2015	82.8128	83.309	83.7931	Projected	e0	LC	BEL
Non-lifestyle attributable mortality	Belgium	Men	2016	82.8471	83.4574	84.0414	Projected	e0	LC	BEL
Non-lifestyle attributable mortality	Belgium	Men	2017	82.9114	83.6064	84.2669	Projected	e0	LC	BEL
Non-lifestyle attributable mortality	Belgium	Men	2018	82.9778	83.7575	84.4843	Projected	e0	LC	BEL
Non-lifestyle attributable mortality	Belgium	Men	2019	83.0508	83.9022	84.6892	Projected	e0	LC	BEL
Non-lifestyle attributable mortality	Belgium	Men	2020	83.1368	84.0491	84.8792	Projected	e0	LC	BEL
Non-lifestyle attributable mortality	Belgium	Men	2021	83.2208	84.1903	85.0754	Projected	e0	LC	BEL
Non-lifestyle attributable mortality	Belgium	Men	2022	83.3213	84.3291	85.2713	Projected	e0	LC	BEL
Non-lifestyle attributable mortality	Belgium	Men	2023	83.416	84.4693	85.4495	Projected	e0	LC	BEL
Non-lifestyle attributable mortality	Belgium	Men	2024	83.5105	84.6087	85.6214	Projected	e0	LC	BEL
Non-lifestyle attributable mortality	Belgium	Men	2025	83.6093	84.7441	85.793	Projected	e0	LC	BEL
Non-lifestyle attributable mortality	Belgium	Men	2026	83.7117	84.8789	85.9545	Projected	e0	LC	BEL
Non-lifestyle attributable mortality	Belgium	Men	2027	83.8109	85.0129	86.1149	Projected	e0	LC	BEL
Non-lifestyle attributable mortality	Belgium	Men	2028	83.9097	85.1449	86.2765	Projected	e0	LC	BEL
Non-lifestyle attributable mortality	Belgium	Men	2029	84.0131	85.2797	86.4312	Projected	e0	LC	BEL
Non-lifestyle attributable mortality	Belgium	Men	2030	84.1228	85.4082	86.5823	Projected	e0	LC	BEL
Non-lifestyle attributable mortality	Belgium	Men	2031	84.2269	85.535	86.7331	Projected	e0	LC	BEL
Non-lifestyle attributable mortality	Belgium	Men	2032	84.3277	85.6628	86.8758	Projected	e0	LC	BEL
Non-lifestyle attributable mortality	Belgium	Men	2033	84.4416	85.7894	87.0253	Projected	e0	LC	BEL
Non-lifestyle attributable mortality	Belgium	Men	2034	84.5456	85.9149	87.1649	Projected	e0	LC	BEL
Non-lifestyle attributable mortality	Belgium	Men	2035	84.6491	86.0394	87.3051	Projected	e0	LC	BEL
Non-lifestyle attributable mortality	Belgium	Men	2036	84.7528	86.163	87.4402	Projected	e0	LC	BEL
Non-lifestyle attributable mortality	Belgium	Men	2037	84.8599	86.2855	87.5771	Projected	e0	LC	BEL
Non-lifestyle attributable mortality	Belgium	Men	2038	84.9618	86.4064	87.7117	Projected	e0	LC	BEL
Non-lifestyle attributable mortality	Belgium	Men	2039	85.0575	86.5257	87.8393	Projected	e0	LC	BEL
Non-lifestyle attributable mortality	Belgium	Men	2040	85.1678	86.6425	87.9613	Projected	e0	LC	BEL
Non-lifestyle attributable mortality	Belgium	Men	2041	85.2653	86.76	88.0951	Projected	e0	LC	BEL
Non-lifestyle attributable mortality	Belgium	Men	2042	85.3662	86.8791	88.2187	Projected	e0	LC	BEL
Non-lifestyle attributable mortality	Belgium	Men	2043	85.4723	86.991	88.3504	Projected	e0	LC	BEL
Non-lifestyle attributable mortality	Belgium	Men	2044	85.5716	87.1076	88.4699	Projected	e0	LC	BEL
Non-lifestyle attributable mortality	Belgium	Men	2045	85.6719	87.2211	88.5899	Projected	e0	LC	BEL
Non-lifestyle attributable mortality	Belgium	Men	2046	85.7784	87.3315	88.7148	Projected	e0	LC	BEL
Non-lifestyle attributable mortality	Belgium	Men	2047	85.8832	87.4414	88.8267	Projected	e0	LC	BEL
Non-lifestyle attributable mortality	Belgium	Men	2048	85.9784	87.5493	88.9386	Projected	e0	LC	BEL
Non-lifestyle attributable mortality	Belgium	Men	2049	86.0854	87.6547	89.0519	Projected	e0	LC	BEL
Non-lifestyle attributable mortality	Belgium	Men	2050	86.1827	87.765	89.162	Projected	e0	LC	BEL
Non-lifestyle attributable mortality	Belgium	Men	2051	86.2716	87.8712	89.2677	Projected	e0	LC	BEL
Non-lifestyle attributable mortality	Belgium	Men	2052	86.369	87.9758	89.3834	Projected	e0	LC	BEL
Non-lifestyle attributable mortality	Belgium	Men	2053	86.4629	88.0774	89.4871	Projected	e0	LC	BEL
Non-lifestyle attributable mortality	Belgium	Men	2054	86.5661	88.1819	89.5919	Projected	e0	LC	BEL
Non-lifestyle attributable mortality	Belgium	Men	2055	86.6635	88.2841	89.6949	Projected	e0	LC	BEL
Non-lifestyle attributable mortality	Belgium	Men	2056	86.7606	88.3848	89.8038	Projected	e0	LC	BEL
Non-lifestyle attributable mortality	Belgium	Men	2057	86.8591	88.48	89.8992	Projected	e0	LC	BEL
Non-lifestyle attributable mortality	Belgium	Men	2058	86.9481	88.5832	90.0011	Projected	e0	LC	BEL
Non-lifestyle attributable mortality	Belgium	Men	2059	87.0457	88.6816	90.1012	Projected	e0	LC	BEL
Non-lifestyle attributable mortality	Belgium	Men	2060	87.1479	88.7787	90.1982	Projected	e0	LC	BEL
Non-lifestyle attributable mortality	Belgium	Men	2061	87.2437	88.8778	90.2918	Projected	e0	LC	BEL
Non-lifestyle attributable mortality	Belgium	Men	2062	87.3229	88.9742	90.3859	Projected	e0	LC	BEL
Non-lifestyle attributable mortality	Belgium	Men	2063	87.412	89.0701	90.4849	Projected	e0	LC	BEL
Non-lifestyle attributable mortality	Belgium	Men	2064	87.5105	89.1671	90.5761	Projected	e0	LC	BEL
Non-lifestyle attributable mortality	Belgium	Men	2065	87.6141	89.2573	90.6736	Projected	e0	LC	BEL
Lifestyle + non-lifestyle attributable mortality	Belgium	Men	1990		72.6959		Observed	e0	LC	BEL
Lifestyle + non-lifestyle attributable mortality	Belgium	Men	1991		72.8459		Observed	e0	LC	BEL
Lifestyle + non-lifestyle attributable mortality	Belgium	Men	1992		72.9736		Observed	e0	LC	BEL
Lifestyle + non-lifestyle attributable mortality	Belgium	Men	1993		72.94		Observed	e0	LC	BEL
Lifestyle + non-lifestyle attributable mortality	Belgium	Men	1994		73.3489		Observed	e0	LC	BEL
Lifestyle + non-lifestyle attributable mortality	Belgium	Men	1995		73.4316		Observed	e0	LC	BEL
Lifestyle + non-lifestyle attributable mortality	Belgium	Men	1996		73.8299		Observed	e0	LC	BEL
Lifestyle + non-lifestyle attributable mortality	Belgium	Men	1997		74.1561		Observed	e0	LC	BEL
Lifestyle + non-lifestyle attributable mortality	Belgium	Men	1998		74.2954		Observed	e0	LC	BEL
Lifestyle + non-lifestyle attributable mortality	Belgium	Men	1999		74.3633		Observed	e0	LC	BEL
Lifestyle + non-lifestyle attributable mortality	Belgium	Men	2000		74.5643		Observed	e0	LC	BEL
Lifestyle + non-lifestyle attributable mortality	Belgium	Men	2001		74.9174		Observed	e0	LC	BEL
Lifestyle + non-lifestyle attributable mortality	Belgium	Men	2002		75.0788		Observed	e0	LC	BEL
Lifestyle + non-lifestyle attributable mortality	Belgium	Men	2003		75.3583		Observed	e0	LC	BEL
Lifestyle + non-lifestyle attributable mortality	Belgium	Men	2004		75.969		Observed	e0	LC	BEL
Lifestyle + non-lifestyle attributable mortality	Belgium	Men	2005		76.1442		Observed	e0	LC	BEL
Lifestyle + non-lifestyle attributable mortality	Belgium	Men	2006		76.5178		Observed	e0	LC	BEL
Lifestyle + non-lifestyle attributable mortality	Belgium	Men	2007		76.7381		Observed	e0	LC	BEL
Lifestyle + non-lifestyle attributable mortality	Belgium	Men	2008		76.769		Observed	e0	LC	BEL
Lifestyle + non-lifestyle attributable mortality	Belgium	Men	2009		77.1593		Observed	e0	LC	BEL
Lifestyle + non-lifestyle attributable mortality	Belgium	Men	2010		77.3748		Observed	e0	LC	BEL
Lifestyle + non-lifestyle attributable mortality	Belgium	Men	2011		77.7662		Observed	e0	LC	BEL
Lifestyle + non-lifestyle attributable mortality	Belgium	Men	2012		77.6319		Observed	e0	LC	BEL
Lifestyle + non-lifestyle attributable mortality	Belgium	Men	2013		77.9477		Observed	e0	LC	BEL
Lifestyle + non-lifestyle attributable mortality	Belgium	Men	2014		78.5727		Observed	e0	LC	BEL
Lifestyle + non-lifestyle attributable mortality	Belgium	Men	2015	78.6739	79.2445	79.8056	Projected	e0	LC	BEL
Lifestyle + non-lifestyle attributable mortality	Belgium	Men	2016	78.8301	79.5988	80.3352	Projected	e0	LC	BEL
Lifestyle + non-lifestyle attributable mortality	Belgium	Men	2017	78.977	79.8319	80.6667	Projected	e0	LC	BEL
Lifestyle + non-lifestyle attributable mortality	Belgium	Men	2018	79.1398	80.1142	81.0334	Projected	e0	LC	BEL
Lifestyle + non-lifestyle attributable mortality	Belgium	Men	2019	79.308	80.3698	81.353	Projected	e0	LC	BEL
Lifestyle + non-lifestyle attributable mortality	Belgium	Men	2020	79.4999	80.6344	81.6786	Projected	e0	LC	BEL
Lifestyle + non-lifestyle attributable mortality	Belgium	Men	2021	79.7024	80.8884	81.9945	Projected	e0	LC	BEL
Lifestyle + non-lifestyle attributable mortality	Belgium	Men	2022	79.8965	81.1429	82.2981	Projected	e0	LC	BEL
Lifestyle + non-lifestyle attributable mortality	Belgium	Men	2023	80.1079	81.3914	82.5842	Projected	e0	LC	BEL
Lifestyle + non-lifestyle attributable mortality	Belgium	Men	2024	80.3195	81.6407	82.8695	Projected	e0	LC	BEL
Lifestyle + non-lifestyle attributable mortality	Belgium	Men	2025	80.5179	81.8768	83.1403	Projected	e0	LC	BEL
Lifestyle + non-lifestyle attributable mortality	Belgium	Men	2026	80.7179	82.1116	83.4061	Projected	e0	LC	BEL
Lifestyle + non-lifestyle attributable mortality	Belgium	Men	2027	80.9162	82.3437	83.6589	Projected	e0	LC	BEL
Lifestyle + non-lifestyle attributable mortality	Belgium	Men	2028	81.0943	82.565	83.9026	Projected	e0	LC	BEL
Lifestyle + non-lifestyle attributable mortality	Belgium	Men	2029	81.2914	82.7829	84.1466	Projected	e0	LC	BEL
Lifestyle + non-lifestyle attributable mortality	Belgium	Men	2030	81.4734	82.991	84.3703	Projected	e0	LC	BEL
Lifestyle + non-lifestyle attributable mortality	Belgium	Men	2031	81.6606	83.1952	84.5975	Projected	e0	LC	BEL
Lifestyle + non-lifestyle attributable mortality	Belgium	Men	2032	81.8342	83.3937	84.8069	Projected	e0	LC	BEL
Lifestyle + non-lifestyle attributable mortality	Belgium	Men	2033	82.004	83.5862	85.0111	Projected	e0	LC	BEL
Lifestyle + non-lifestyle attributable mortality	Belgium	Men	2034	82.1808	83.7714	85.2135	Projected	e0	LC	BEL
Lifestyle + non-lifestyle attributable mortality	Belgium	Men	2035	82.3467	83.95	85.4146	Projected	e0	LC	BEL
Lifestyle + non-lifestyle attributable mortality	Belgium	Men	2036	82.5013	84.1331	85.5975	Projected	e0	LC	BEL
Lifestyle + non-lifestyle attributable mortality	Belgium	Men	2037	82.67	84.304	85.7931	Projected	e0	LC	BEL
Lifestyle + non-lifestyle attributable mortality	Belgium	Men	2038	82.8221	84.4735	85.9669	Projected	e0	LC	BEL
Lifestyle + non-lifestyle attributable mortality	Belgium	Men	2039	82.9691	84.6412	86.1413	Projected	e0	LC	BEL
Lifestyle + non-lifestyle attributable mortality	Belgium	Men	2040	83.1294	84.7994	86.3066	Projected	e0	LC	BEL
Lifestyle + non-lifestyle attributable mortality	Belgium	Men	2041	83.2704	84.9598	86.4766	Projected	e0	LC	BEL
Lifestyle + non-lifestyle attributable mortality	Belgium	Men	2042	83.4102	85.1165	86.642	Projected	e0	LC	BEL
Lifestyle + non-lifestyle attributable mortality	Belgium	Men	2043	83.5495	85.2674	86.8071	Projected	e0	LC	BEL
Lifestyle + non-lifestyle attributable mortality	Belgium	Men	2044	83.6979	85.4192	86.9601	Projected	e0	LC	BEL
Lifestyle + non-lifestyle attributable mortality	Belgium	Men	2045	83.8337	85.5684	87.1126	Projected	e0	LC	BEL
Lifestyle + non-lifestyle attributable mortality	Belgium	Men	2046	83.9774	85.7149	87.2715	Projected	e0	LC	BEL
Lifestyle + non-lifestyle attributable mortality	Belgium	Men	2047	84.1147	85.8567	87.4207	Projected	e0	LC	BEL
Lifestyle + non-lifestyle attributable mortality	Belgium	Men	2048	84.2499	85.9994	87.5616	Projected	e0	LC	BEL
Lifestyle + non-lifestyle attributable mortality	Belgium	Men	2049	84.3843	86.1383	87.7013	Projected	e0	LC	BEL
Lifestyle + non-lifestyle attributable mortality	Belgium	Men	2050	84.5162	86.283	87.8521	Projected	e0	LC	BEL
Lifestyle + non-lifestyle attributable mortality	Belgium	Men	2051	84.6448	86.4186	87.9925	Projected	e0	LC	BEL
Lifestyle + non-lifestyle attributable mortality	Belgium	Men	2052	84.7821	86.5536	88.13	Projected	e0	LC	BEL
Lifestyle + non-lifestyle attributable mortality	Belgium	Men	2053	84.8974	86.6871	88.2654	Projected	e0	LC	BEL
Lifestyle + non-lifestyle attributable mortality	Belgium	Men	2054	85.0307	86.8206	88.3979	Projected	e0	LC	BEL
Lifestyle + non-lifestyle attributable mortality	Belgium	Men	2055	85.1562	86.9513	88.5284	Projected	e0	LC	BEL
Lifestyle + non-lifestyle attributable mortality	Belgium	Men	2056	85.2846	87.0799	88.6647	Projected	e0	LC	BEL
Lifestyle + non-lifestyle attributable mortality	Belgium	Men	2057	85.4108	87.2092	88.7926	Projected	e0	LC	BEL
Lifestyle + non-lifestyle attributable mortality	Belgium	Men	2058	85.5307	87.3349	88.9126	Projected	e0	LC	BEL
Lifestyle + non-lifestyle attributable mortality	Belgium	Men	2059	85.6612	87.4645	89.0428	Projected	e0	LC	BEL
Lifestyle + non-lifestyle attributable mortality	Belgium	Men	2060	85.787	87.589	89.1633	Projected	e0	LC	BEL
Lifestyle + non-lifestyle attributable mortality	Belgium	Men	2061	85.9159	87.7137	89.2818	Projected	e0	LC	BEL
Lifestyle + non-lifestyle attributable mortality	Belgium	Men	2062	86.0189	87.8383	89.3975	Projected	e0	LC	BEL
Lifestyle + non-lifestyle attributable mortality	Belgium	Men	2063	86.1374	87.9593	89.5181	Projected	e0	LC	BEL
Lifestyle + non-lifestyle attributable mortality	Belgium	Men	2064	86.2639	88.0796	89.6375	Projected	e0	LC	BEL
Lifestyle + non-lifestyle attributable mortality	Belgium	Men	2065	86.3905	88.1993	89.757	Projected	e0	LC	BEL
All-cause mortality	Czech Republic	Men	1990		67.5308		Observed	e0	LC	CZE
All-cause mortality	Czech Republic	Men	1991		68.2322		Observed	e0	LC	CZE
All-cause mortality	Czech Republic	Men	1992		68.5215		Observed	e0	LC	CZE
All-cause mortality	Czech Republic	Men	1993		69.2473		Observed	e0	LC	CZE
All-cause mortality	Czech Republic	Men	1994		69.4891		Observed	e0	LC	CZE
All-cause mortality	Czech Republic	Men	1995		69.6644		Observed	e0	LC	CZE
All-cause mortality	Czech Republic	Men	1996		70.3055		Observed	e0	LC	CZE
All-cause mortality	Czech Republic	Men	1997		70.4216		Observed	e0	LC	CZE
All-cause mortality	Czech Republic	Men	1998		71.0483		Observed	e0	LC	CZE
All-cause mortality	Czech Republic	Men	1999		71.3329		Observed	e0	LC	CZE
All-cause mortality	Czech Republic	Men	2000		71.5518		Observed	e0	LC	CZE
All-cause mortality	Czech Republic	Men	2001		72.0241		Observed	e0	LC	CZE
All-cause mortality	Czech Republic	Men	2002		72.1023		Observed	e0	LC	CZE
All-cause mortality	Czech Republic	Men	2003		72.0846		Observed	e0	LC	CZE
All-cause mortality	Czech Republic	Men	2004		72.6117		Observed	e0	LC	CZE
All-cause mortality	Czech Republic	Men	2005		72.9513		Observed	e0	LC	CZE
All-cause mortality	Czech Republic	Men	2006		73.4759		Observed	e0	LC	CZE
All-cause mortality	Czech Republic	Men	2007		73.6986		Observed	e0	LC	CZE
All-cause mortality	Czech Republic	Men	2008		73.9675		Observed	e0	LC	CZE
All-cause mortality	Czech Republic	Men	2009		74.1596		Observed	e0	LC	CZE
All-cause mortality	Czech Republic	Men	2010		74.4332		Observed	e0	LC	CZE
All-cause mortality	Czech Republic	Men	2011		74.7197		Observed	e0	LC	CZE
All-cause mortality	Czech Republic	Men	2012		74.9654		Observed	e0	LC	CZE
All-cause mortality	Czech Republic	Men	2013		75.1477		Observed	e0	LC	CZE
All-cause mortality	Czech Republic	Men	2014	75.6154	75.9734	76.3297	Projected	e0	LC	CZE
All-cause mortality	Czech Republic	Men	2014		75.7177		Observed	e0	LC	CZE
All-cause mortality	Czech Republic	Men	2015	75.7673	76.27	76.7651	Projected	e0	LC	CZE
All-cause mortality	Czech Republic	Men	2016	75.9524	76.5631	77.1674	Projected	e0	LC	CZE
All-cause mortality	Czech Republic	Men	2017	76.1557	76.855	77.548	Projected	e0	LC	CZE
All-cause mortality	Czech Republic	Men	2018	76.3685	77.1437	77.9078	Projected	e0	LC	CZE
All-cause mortality	Czech Republic	Men	2019	76.59	77.43	78.2585	Projected	e0	LC	CZE
All-cause mortality	Czech Republic	Men	2020	76.8144	77.7168	78.6005	Projected	e0	LC	CZE
All-cause mortality	Czech Republic	Men	2021	77.043	77.9974	78.9323	Projected	e0	LC	CZE
All-cause mortality	Czech Republic	Men	2022	77.2733	78.2748	79.2523	Projected	e0	LC	CZE
All-cause mortality	Czech Republic	Men	2023	77.5086	78.5509	79.5643	Projected	e0	LC	CZE
All-cause mortality	Czech Republic	Men	2024	77.7364	78.8254	79.874	Projected	e0	LC	CZE
All-cause mortality	Czech Republic	Men	2025	77.9674	79.0925	80.1761	Projected	e0	LC	CZE
All-cause mortality	Czech Republic	Men	2026	78.1974	79.363	80.4682	Projected	e0	LC	CZE
All-cause mortality	Czech Republic	Men	2027	78.4235	79.6281	80.7634	Projected	e0	LC	CZE
All-cause mortality	Czech Republic	Men	2028	78.6579	79.887	81.0527	Projected	e0	LC	CZE
All-cause mortality	Czech Republic	Men	2029	78.8865	80.1458	81.339	Projected	e0	LC	CZE
All-cause mortality	Czech Republic	Men	2030	79.1093	80.4031	81.6221	Projected	e0	LC	CZE
All-cause mortality	Czech Republic	Men	2031	79.3397	80.6544	81.8884	Projected	e0	LC	CZE
All-cause mortality	Czech Republic	Men	2032	79.5715	80.9051	82.1593	Projected	e0	LC	CZE
All-cause mortality	Czech Republic	Men	2033	79.7975	81.1567	82.4353	Projected	e0	LC	CZE
All-cause mortality	Czech Republic	Men	2034	80.019	81.4009	82.6988	Projected	e0	LC	CZE
All-cause mortality	Czech Republic	Men	2035	80.2425	81.6407	82.9464	Projected	e0	LC	CZE
All-cause mortality	Czech Republic	Men	2036	80.4658	81.8823	83.2083	Projected	e0	LC	CZE
All-cause mortality	Czech Republic	Men	2037	80.6904	82.1202	83.4535	Projected	e0	LC	CZE
All-cause mortality	Czech Republic	Men	2038	80.9112	82.3565	83.7028	Projected	e0	LC	CZE
All-cause mortality	Czech Republic	Men	2039	81.1321	82.5904	83.9502	Projected	e0	LC	CZE
All-cause mortality	Czech Republic	Men	2040	81.3607	82.8194	84.1832	Projected	e0	LC	CZE
All-cause mortality	Czech Republic	Men	2041	81.5651	83.0465	84.4301	Projected	e0	LC	CZE
All-cause mortality	Czech Republic	Men	2042	81.7838	83.273	84.651	Projected	e0	LC	CZE
All-cause mortality	Czech Republic	Men	2043	81.9954	83.4915	84.8795	Projected	e0	LC	CZE
All-cause mortality	Czech Republic	Men	2044	82.2071	83.7134	85.1114	Projected	e0	LC	CZE
All-cause mortality	Czech Republic	Men	2045	82.4157	83.9325	85.3308	Projected	e0	LC	CZE
All-cause mortality	Czech Republic	Men	2046	82.6197	84.1493	85.5573	Projected	e0	LC	CZE
All-cause mortality	Czech Republic	Men	2047	82.8286	84.3583	85.7667	Projected	e0	LC	CZE
All-cause mortality	Czech Republic	Men	2048	83.0377	84.5706	85.9825	Projected	e0	LC	CZE
All-cause mortality	Czech Republic	Men	2049	83.2393	84.7775	86.1834	Projected	e0	LC	CZE
All-cause mortality	Czech Republic	Men	2050	83.4445	84.9831	86.3895	Projected	e0	LC	CZE
All-cause mortality	Czech Republic	Men	2051	83.6435	85.1866	86.5987	Projected	e0	LC	CZE
All-cause mortality	Czech Republic	Men	2052	83.8447	85.3831	86.8031	Projected	e0	LC	CZE
All-cause mortality	Czech Republic	Men	2053	84.0278	85.5787	86.9996	Projected	e0	LC	CZE
All-cause mortality	Czech Republic	Men	2054	84.2215	85.7738	87.1964	Projected	e0	LC	CZE
All-cause mortality	Czech Republic	Men	2055	84.4108	85.9673	87.386	Projected	e0	LC	CZE
All-cause mortality	Czech Republic	Men	2056	84.6044	86.1576	87.5738	Projected	e0	LC	CZE
All-cause mortality	Czech Republic	Men	2057	84.7949	86.3454	87.7621	Projected	e0	LC	CZE
All-cause mortality	Czech Republic	Men	2058	84.988	86.531	87.9498	Projected	e0	LC	CZE
All-cause mortality	Czech Republic	Men	2059	85.1781	86.7182	88.128	Projected	e0	LC	CZE
All-cause mortality	Czech Republic	Men	2060	85.365	86.8994	88.3048	Projected	e0	LC	CZE
All-cause mortality	Czech Republic	Men	2061	85.5347	87.0798	88.4765	Projected	e0	LC	CZE
All-cause mortality	Czech Republic	Men	2062	85.7216	87.254	88.6531	Projected	e0	LC	CZE
All-cause mortality	Czech Republic	Men	2063	85.8936	87.4294	88.8277	Projected	e0	LC	CZE
All-cause mortality	Czech Republic	Men	2064	86.0656	87.6035	88.9911	Projected	e0	LC	CZE
All-cause mortality	Czech Republic	Men	2065	86.2365	87.7739	89.1588	Projected	e0	LC	CZE
Non-lifestyle attributable mortality	Czech Republic	Men	1990		75.1384		Observed	e0	LC	CZE
Non-lifestyle attributable mortality	Czech Republic	Men	1991		75.6319		Observed	e0	LC	CZE
Non-lifestyle attributable mortality	Czech Republic	Men	1992		75.9354		Observed	e0	LC	CZE
Non-lifestyle attributable mortality	Czech Republic	Men	1993		76.4841		Observed	e0	LC	CZE
Non-lifestyle attributable mortality	Czech Republic	Men	1994		76.5165		Observed	e0	LC	CZE
Non-lifestyle attributable mortality	Czech Republic	Men	1995		76.7826		Observed	e0	LC	CZE
Non-lifestyle attributable mortality	Czech Republic	Men	1996		77.3481		Observed	e0	LC	CZE
Non-lifestyle attributable mortality	Czech Republic	Men	1997		77.4806		Observed	e0	LC	CZE
Non-lifestyle attributable mortality	Czech Republic	Men	1998		77.855		Observed	e0	LC	CZE
Non-lifestyle attributable mortality	Czech Republic	Men	1999		78.1037		Observed	e0	LC	CZE
Non-lifestyle attributable mortality	Czech Republic	Men	2000		78.3552		Observed	e0	LC	CZE
Non-lifestyle attributable mortality	Czech Republic	Men	2001		78.5755		Observed	e0	LC	CZE
Non-lifestyle attributable mortality	Czech Republic	Men	2002		78.601		Observed	e0	LC	CZE
Non-lifestyle attributable mortality	Czech Republic	Men	2003		78.5579		Observed	e0	LC	CZE
Non-lifestyle attributable mortality	Czech Republic	Men	2004		78.9953		Observed	e0	LC	CZE
Non-lifestyle attributable mortality	Czech Republic	Men	2005		79.0755		Observed	e0	LC	CZE
Non-lifestyle attributable mortality	Czech Republic	Men	2006		79.4836		Observed	e0	LC	CZE
Non-lifestyle attributable mortality	Czech Republic	Men	2007		79.5801		Observed	e0	LC	CZE
Non-lifestyle attributable mortality	Czech Republic	Men	2008		79.6751		Observed	e0	LC	CZE
Non-lifestyle attributable mortality	Czech Republic	Men	2009		79.7736		Observed	e0	LC	CZE
Non-lifestyle attributable mortality	Czech Republic	Men	2010		80.06		Observed	e0	LC	CZE
Non-lifestyle attributable mortality	Czech Republic	Men	2011		80.2048		Observed	e0	LC	CZE
Non-lifestyle attributable mortality	Czech Republic	Men	2012		80.2411		Observed	e0	LC	CZE
Non-lifestyle attributable mortality	Czech Republic	Men	2013		80.2886		Observed	e0	LC	CZE
Non-lifestyle attributable mortality	Czech Republic	Men	2014	80.5509	80.8375	81.1169	Projected	e0	LC	CZE
Non-lifestyle attributable mortality	Czech Republic	Men	2014		80.6374		Observed	e0	LC	CZE
Non-lifestyle attributable mortality	Czech Republic	Men	2015	80.6258	81.0295	81.4199	Projected	e0	LC	CZE
Non-lifestyle attributable mortality	Czech Republic	Men	2016	80.7264	81.2188	81.6965	Projected	e0	LC	CZE
Non-lifestyle attributable mortality	Czech Republic	Men	2017	80.8524	81.4079	81.9465	Projected	e0	LC	CZE
Non-lifestyle attributable mortality	Czech Republic	Men	2018	80.9718	81.5956	82.1946	Projected	e0	LC	CZE
Non-lifestyle attributable mortality	Czech Republic	Men	2019	81.1077	81.7826	82.4342	Projected	e0	LC	CZE
Non-lifestyle attributable mortality	Czech Republic	Men	2020	81.2441	81.9679	82.6627	Projected	e0	LC	CZE
Non-lifestyle attributable mortality	Czech Republic	Men	2021	81.3834	82.1483	82.8842	Projected	e0	LC	CZE
Non-lifestyle attributable mortality	Czech Republic	Men	2022	81.525	82.3287	83.1087	Projected	e0	LC	CZE
Non-lifestyle attributable mortality	Czech Republic	Men	2023	81.6661	82.5103	83.326	Projected	e0	LC	CZE
Non-lifestyle attributable mortality	Czech Republic	Men	2024	81.8089	82.6893	83.5376	Projected	e0	LC	CZE
Non-lifestyle attributable mortality	Czech Republic	Men	2025	81.957	82.8653	83.7413	Projected	e0	LC	CZE
Non-lifestyle attributable mortality	Czech Republic	Men	2026	82.1078	83.0408	83.9448	Projected	e0	LC	CZE
Non-lifestyle attributable mortality	Czech Republic	Men	2027	82.2484	83.2153	84.1465	Projected	e0	LC	CZE
Non-lifestyle attributable mortality	Czech Republic	Men	2028	82.3898	83.3884	84.3441	Projected	e0	LC	CZE
Non-lifestyle attributable mortality	Czech Republic	Men	2029	82.5407	83.5594	84.5372	Projected	e0	LC	CZE
Non-lifestyle attributable mortality	Czech Republic	Men	2030	82.6838	83.7285	84.7318	Projected	e0	LC	CZE
Non-lifestyle attributable mortality	Czech Republic	Men	2031	82.8385	83.8961	84.9264	Projected	e0	LC	CZE
Non-lifestyle attributable mortality	Czech Republic	Men	2032	82.9828	84.0651	85.1066	Projected	e0	LC	CZE
Non-lifestyle attributable mortality	Czech Republic	Men	2033	83.1281	84.2307	85.2915	Projected	e0	LC	CZE
Non-lifestyle attributable mortality	Czech Republic	Men	2034	83.2695	84.3969	85.4779	Projected	e0	LC	CZE
Non-lifestyle attributable mortality	Czech Republic	Men	2035	83.4145	84.5604	85.6526	Projected	e0	LC	CZE
Non-lifestyle attributable mortality	Czech Republic	Men	2036	83.562	84.7222	85.8368	Projected	e0	LC	CZE
Non-lifestyle attributable mortality	Czech Republic	Men	2037	83.7068	84.8835	86.0205	Projected	e0	LC	CZE
Non-lifestyle attributable mortality	Czech Republic	Men	2038	83.848	85.0449	86.1944	Projected	e0	LC	CZE
Non-lifestyle attributable mortality	Czech Republic	Men	2039	83.9931	85.2034	86.3594	Projected	e0	LC	CZE
Non-lifestyle attributable mortality	Czech Republic	Men	2040	84.1391	85.3596	86.5285	Projected	e0	LC	CZE
Non-lifestyle attributable mortality	Czech Republic	Men	2041	84.2879	85.5145	86.6919	Projected	e0	LC	CZE
Non-lifestyle attributable mortality	Czech Republic	Men	2042	84.4256	85.6715	86.853	Projected	e0	LC	CZE
Non-lifestyle attributable mortality	Czech Republic	Men	2043	84.5752	85.8279	87.0164	Projected	e0	LC	CZE
Non-lifestyle attributable mortality	Czech Republic	Men	2044	84.7111	85.9834	87.1797	Projected	e0	LC	CZE
Non-lifestyle attributable mortality	Czech Republic	Men	2045	84.8588	86.1343	87.341	Projected	e0	LC	CZE
Non-lifestyle attributable mortality	Czech Republic	Men	2046	85.001	86.2855	87.5009	Projected	e0	LC	CZE
Non-lifestyle attributable mortality	Czech Republic	Men	2047	85.1357	86.4367	87.6673	Projected	e0	LC	CZE
Non-lifestyle attributable mortality	Czech Republic	Men	2048	85.279	86.5845	87.8219	Projected	e0	LC	CZE
Non-lifestyle attributable mortality	Czech Republic	Men	2049	85.4138	86.732	87.9745	Projected	e0	LC	CZE
Non-lifestyle attributable mortality	Czech Republic	Men	2050	85.5473	86.8785	88.1191	Projected	e0	LC	CZE
Non-lifestyle attributable mortality	Czech Republic	Men	2051	85.6892	87.0235	88.2775	Projected	e0	LC	CZE
Non-lifestyle attributable mortality	Czech Republic	Men	2052	85.8209	87.1681	88.4242	Projected	e0	LC	CZE
Non-lifestyle attributable mortality	Czech Republic	Men	2053	85.9531	87.3092	88.5733	Projected	e0	LC	CZE
Non-lifestyle attributable mortality	Czech Republic	Men	2054	86.0891	87.4467	88.7185	Projected	e0	LC	CZE
Non-lifestyle attributable mortality	Czech Republic	Men	2055	86.2237	87.5848	88.8667	Projected	e0	LC	CZE
Non-lifestyle attributable mortality	Czech Republic	Men	2056	86.354	87.7266	89.0141	Projected	e0	LC	CZE
Non-lifestyle attributable mortality	Czech Republic	Men	2057	86.4945	87.8651	89.1497	Projected	e0	LC	CZE
Non-lifestyle attributable mortality	Czech Republic	Men	2058	86.6247	88.001	89.2891	Projected	e0	LC	CZE
Non-lifestyle attributable mortality	Czech Republic	Men	2059	86.7525	88.1383	89.4249	Projected	e0	LC	CZE
Non-lifestyle attributable mortality	Czech Republic	Men	2060	86.8816	88.2735	89.5594	Projected	e0	LC	CZE
Non-lifestyle attributable mortality	Czech Republic	Men	2061	87.013	88.4093	89.7002	Projected	e0	LC	CZE
Non-lifestyle attributable mortality	Czech Republic	Men	2062	87.1468	88.5398	89.8319	Projected	e0	LC	CZE
Non-lifestyle attributable mortality	Czech Republic	Men	2063	87.2738	88.669	89.961	Projected	e0	LC	CZE
Non-lifestyle attributable mortality	Czech Republic	Men	2064	87.4019	88.8018	90.0943	Projected	e0	LC	CZE
Non-lifestyle attributable mortality	Czech Republic	Men	2065	87.5289	88.9303	90.2207	Projected	e0	LC	CZE
Lifestyle + non-lifestyle attributable mortality	Czech Republic	Men	1990		67.5308		Observed	e0	LC	CZE
Lifestyle + non-lifestyle attributable mortality	Czech Republic	Men	1991		68.2322		Observed	e0	LC	CZE
Lifestyle + non-lifestyle attributable mortality	Czech Republic	Men	1992		68.5215		Observed	e0	LC	CZE
Lifestyle + non-lifestyle attributable mortality	Czech Republic	Men	1993		69.2473		Observed	e0	LC	CZE
Lifestyle + non-lifestyle attributable mortality	Czech Republic	Men	1994		69.4891		Observed	e0	LC	CZE
Lifestyle + non-lifestyle attributable mortality	Czech Republic	Men	1995		69.6644		Observed	e0	LC	CZE
Lifestyle + non-lifestyle attributable mortality	Czech Republic	Men	1996		70.3055		Observed	e0	LC	CZE
Lifestyle + non-lifestyle attributable mortality	Czech Republic	Men	1997		70.4216		Observed	e0	LC	CZE
Lifestyle + non-lifestyle attributable mortality	Czech Republic	Men	1998		71.0483		Observed	e0	LC	CZE
Lifestyle + non-lifestyle attributable mortality	Czech Republic	Men	1999		71.3329		Observed	e0	LC	CZE
Lifestyle + non-lifestyle attributable mortality	Czech Republic	Men	2000		71.5518		Observed	e0	LC	CZE
Lifestyle + non-lifestyle attributable mortality	Czech Republic	Men	2001		72.0241		Observed	e0	LC	CZE
Lifestyle + non-lifestyle attributable mortality	Czech Republic	Men	2002		72.1023		Observed	e0	LC	CZE
Lifestyle + non-lifestyle attributable mortality	Czech Republic	Men	2003		72.0846		Observed	e0	LC	CZE
Lifestyle + non-lifestyle attributable mortality	Czech Republic	Men	2004		72.6117		Observed	e0	LC	CZE
Lifestyle + non-lifestyle attributable mortality	Czech Republic	Men	2005		72.9513		Observed	e0	LC	CZE
Lifestyle + non-lifestyle attributable mortality	Czech Republic	Men	2006		73.4759		Observed	e0	LC	CZE
Lifestyle + non-lifestyle attributable mortality	Czech Republic	Men	2007		73.6986		Observed	e0	LC	CZE
Lifestyle + non-lifestyle attributable mortality	Czech Republic	Men	2008		73.9675		Observed	e0	LC	CZE
Lifestyle + non-lifestyle attributable mortality	Czech Republic	Men	2009		74.1596		Observed	e0	LC	CZE
Lifestyle + non-lifestyle attributable mortality	Czech Republic	Men	2010		74.4332		Observed	e0	LC	CZE
Lifestyle + non-lifestyle attributable mortality	Czech Republic	Men	2011		74.7197		Observed	e0	LC	CZE
Lifestyle + non-lifestyle attributable mortality	Czech Republic	Men	2012		74.9654		Observed	e0	LC	CZE
Lifestyle + non-lifestyle attributable mortality	Czech Republic	Men	2013		75.1477		Observed	e0	LC	CZE
Lifestyle + non-lifestyle attributable mortality	Czech Republic	Men	2014		75.7177		Observed	e0	LC	CZE
Lifestyle + non-lifestyle attributable mortality	Czech Republic	Men	2015	75.944	76.3935	76.8313	Projected	e0	LC	CZE
Lifestyle + non-lifestyle attributable mortality	Czech Republic	Men	2016	76.099	76.6482	77.1856	Projected	e0	LC	CZE
Lifestyle + non-lifestyle attributable mortality	Czech Republic	Men	2017	76.521	77.2099	77.8771	Projected	e0	LC	CZE
Lifestyle + non-lifestyle attributable mortality	Czech Republic	Men	2018	76.8125	77.5651	78.2865	Projected	e0	LC	CZE
Lifestyle + non-lifestyle attributable mortality	Czech Republic	Men	2019	77.1124	77.9093	78.688	Projected	e0	LC	CZE
Lifestyle + non-lifestyle attributable mortality	Czech Republic	Men	2020	77.4006	78.2434	79.0685	Projected	e0	LC	CZE
Lifestyle + non-lifestyle attributable mortality	Czech Republic	Men	2021	77.6734	78.5603	79.4223	Projected	e0	LC	CZE
Lifestyle + non-lifestyle attributable mortality	Czech Republic	Men	2022	77.9409	78.8663	79.7713	Projected	e0	LC	CZE
Lifestyle + non-lifestyle attributable mortality	Czech Republic	Men	2023	78.2	79.1614	80.1026	Projected	e0	LC	CZE
Lifestyle + non-lifestyle attributable mortality	Czech Republic	Men	2024	78.4438	79.4393	80.4141	Projected	e0	LC	CZE
Lifestyle + non-lifestyle attributable mortality	Czech Republic	Men	2025	78.6777	79.7116	80.7134	Projected	e0	LC	CZE
Lifestyle + non-lifestyle attributable mortality	Czech Republic	Men	2026	78.9091	79.9711	81.0039	Projected	e0	LC	CZE
Lifestyle + non-lifestyle attributable mortality	Czech Republic	Men	2027	79.1341	80.2249	81.283	Projected	e0	LC	CZE
Lifestyle + non-lifestyle attributable mortality	Czech Republic	Men	2028	79.3535	80.4699	81.5545	Projected	e0	LC	CZE
Lifestyle + non-lifestyle attributable mortality	Czech Republic	Men	2029	79.5617	80.7082	81.8158	Projected	e0	LC	CZE
Lifestyle + non-lifestyle attributable mortality	Czech Republic	Men	2030	79.7724	80.9421	82.0766	Projected	e0	LC	CZE
Lifestyle + non-lifestyle attributable mortality	Czech Republic	Men	2031	79.9768	81.1679	82.3261	Projected	e0	LC	CZE
Lifestyle + non-lifestyle attributable mortality	Czech Republic	Men	2032	80.1754	81.3905	82.5591	Projected	e0	LC	CZE
Lifestyle + non-lifestyle attributable mortality	Czech Republic	Men	2033	80.3723	81.6072	82.8028	Projected	e0	LC	CZE
Lifestyle + non-lifestyle attributable mortality	Czech Republic	Men	2034	80.5547	81.8179	83.0335	Projected	e0	LC	CZE
Lifestyle + non-lifestyle attributable mortality	Czech Republic	Men	2035	80.7478	82.0293	83.2564	Projected	e0	LC	CZE
Lifestyle + non-lifestyle attributable mortality	Czech Republic	Men	2036	80.938	82.2319	83.4822	Projected	e0	LC	CZE
Lifestyle + non-lifestyle attributable mortality	Czech Republic	Men	2037	81.1204	82.4373	83.7132	Projected	e0	LC	CZE
Lifestyle + non-lifestyle attributable mortality	Czech Republic	Men	2038	81.2958	82.6326	83.9272	Projected	e0	LC	CZE
Lifestyle + non-lifestyle attributable mortality	Czech Republic	Men	2039	81.4788	82.8306	84.1308	Projected	e0	LC	CZE
Lifestyle + non-lifestyle attributable mortality	Czech Republic	Men	2040	81.6575	83.0202	84.3403	Projected	e0	LC	CZE
Lifestyle + non-lifestyle attributable mortality	Czech Republic	Men	2041	81.8373	83.2088	84.5342	Projected	e0	LC	CZE
Lifestyle + non-lifestyle attributable mortality	Czech Republic	Men	2042	82.0118	83.3978	84.7281	Projected	e0	LC	CZE
Lifestyle + non-lifestyle attributable mortality	Czech Republic	Men	2043	82.1832	83.5826	84.9215	Projected	e0	LC	CZE
Lifestyle + non-lifestyle attributable mortality	Czech Republic	Men	2044	82.3524	83.767	85.1106	Projected	e0	LC	CZE
Lifestyle + non-lifestyle attributable mortality	Czech Republic	Men	2045	82.5208	83.945	85.3028	Projected	e0	LC	CZE
Lifestyle + non-lifestyle attributable mortality	Czech Republic	Men	2046	82.6923	84.1247	85.491	Projected	e0	LC	CZE
Lifestyle + non-lifestyle attributable mortality	Czech Republic	Men	2047	82.8486	84.3007	85.685	Projected	e0	LC	CZE
Lifestyle + non-lifestyle attributable mortality	Czech Republic	Men	2048	83.0102	84.4742	85.8688	Projected	e0	LC	CZE
Lifestyle + non-lifestyle attributable mortality	Czech Republic	Men	2049	83.1675	84.6446	86.0489	Projected	e0	LC	CZE
Lifestyle + non-lifestyle attributable mortality	Czech Republic	Men	2050	83.3235	84.8174	86.2163	Projected	e0	LC	CZE
Lifestyle + non-lifestyle attributable mortality	Czech Republic	Men	2051	83.4882	84.984	86.4007	Projected	e0	LC	CZE
Lifestyle + non-lifestyle attributable mortality	Czech Republic	Men	2052	83.6464	85.1541	86.5739	Projected	e0	LC	CZE
Lifestyle + non-lifestyle attributable mortality	Czech Republic	Men	2053	83.7972	85.3178	86.7449	Projected	e0	LC	CZE
Lifestyle + non-lifestyle attributable mortality	Czech Republic	Men	2054	83.9543	85.4783	86.9213	Projected	e0	LC	CZE
Lifestyle + non-lifestyle attributable mortality	Czech Republic	Men	2055	84.1106	85.639	87.0939	Projected	e0	LC	CZE
Lifestyle + non-lifestyle attributable mortality	Czech Republic	Men	2056	84.2607	85.8031	87.2608	Projected	e0	LC	CZE
Lifestyle + non-lifestyle attributable mortality	Czech Republic	Men	2057	84.4249	85.9676	87.4244	Projected	e0	LC	CZE
Lifestyle + non-lifestyle attributable mortality	Czech Republic	Men	2058	84.5736	86.1262	87.5867	Projected	e0	LC	CZE
Lifestyle + non-lifestyle attributable mortality	Czech Republic	Men	2059	84.7297	86.2879	87.7512	Projected	e0	LC	CZE
Lifestyle + non-lifestyle attributable mortality	Czech Republic	Men	2060	84.8819	86.4481	87.9077	Projected	e0	LC	CZE
Lifestyle + non-lifestyle attributable mortality	Czech Republic	Men	2061	85.0309	86.6074	88.0703	Projected	e0	LC	CZE
Lifestyle + non-lifestyle attributable mortality	Czech Republic	Men	2062	85.1881	86.763	88.2272	Projected	e0	LC	CZE
Lifestyle + non-lifestyle attributable mortality	Czech Republic	Men	2063	85.3419	86.9171	88.3875	Projected	e0	LC	CZE
Lifestyle + non-lifestyle attributable mortality	Czech Republic	Men	2064	85.4929	87.0739	88.5447	Projected	e0	LC	CZE
Lifestyle + non-lifestyle attributable mortality	Czech Republic	Men	2065	85.6453	87.2265	88.6961	Projected	e0	LC	CZE
All-cause mortality	Denmark	Men	1990		72.0205		Observed	e0	LC	DNK
All-cause mortality	Denmark	Men	1991		72.472		Observed	e0	LC	DNK
All-cause mortality	Denmark	Men	1992		72.5603		Observed	e0	LC	DNK
All-cause mortality	Denmark	Men	1993		72.593		Observed	e0	LC	DNK
All-cause mortality	Denmark	Men	1994		72.7735		Observed	e0	LC	DNK
All-cause mortality	Denmark	Men	1995		72.7262		Observed	e0	LC	DNK
All-cause mortality	Denmark	Men	1996		73.051		Observed	e0	LC	DNK
All-cause mortality	Denmark	Men	1997		73.5578		Observed	e0	LC	DNK
All-cause mortality	Denmark	Men	1998		73.9403		Observed	e0	LC	DNK
All-cause mortality	Denmark	Men	1999		74.2002		Observed	e0	LC	DNK
All-cause mortality	Denmark	Men	2000		74.4346		Observed	e0	LC	DNK
All-cause mortality	Denmark	Men	2001		74.6681		Observed	e0	LC	DNK
All-cause mortality	Denmark	Men	2002		74.8		Observed	e0	LC	DNK
All-cause mortality	Denmark	Men	2003		75.2804		Observed	e0	LC	DNK
All-cause mortality	Denmark	Men	2004		75.1489		Observed	e0	LC	DNK
All-cause mortality	Denmark	Men	2005		75.9334		Observed	e0	LC	DNK
All-cause mortality	Denmark	Men	2006		75.8926		Observed	e0	LC	DNK
All-cause mortality	Denmark	Men	2007		76.1261		Observed	e0	LC	DNK
All-cause mortality	Denmark	Men	2008		76.4814		Observed	e0	LC	DNK
All-cause mortality	Denmark	Men	2009		76.8442		Observed	e0	LC	DNK
All-cause mortality	Denmark	Men	2010		77.1133		Observed	e0	LC	DNK
All-cause mortality	Denmark	Men	2011		77.7073		Observed	e0	LC	DNK
All-cause mortality	Denmark	Men	2012		78.0567		Observed	e0	LC	DNK
All-cause mortality	Denmark	Men	2013		78.2629		Observed	e0	LC	DNK
All-cause mortality	Denmark	Men	2014	78.4218	78.8296	79.2308	Projected	e0	LC	DNK
All-cause mortality	Denmark	Men	2014		78.5638		Observed	e0	LC	DNK
All-cause mortality	Denmark	Men	2015	78.4871	79.0572	79.618	Projected	e0	LC	DNK
All-cause mortality	Denmark	Men	2016	78.5849	79.2854	79.9514	Projected	e0	LC	DNK
All-cause mortality	Denmark	Men	2017	78.7146	79.5111	80.2701	Projected	e0	LC	DNK
All-cause mortality	Denmark	Men	2018	78.851	79.7312	80.5744	Projected	e0	LC	DNK
All-cause mortality	Denmark	Men	2019	79.0036	79.9481	80.8576	Projected	e0	LC	DNK
All-cause mortality	Denmark	Men	2020	79.1469	80.1674	81.1383	Projected	e0	LC	DNK
All-cause mortality	Denmark	Men	2021	79.3076	80.3831	81.4126	Projected	e0	LC	DNK
All-cause mortality	Denmark	Men	2022	79.4638	80.5953	81.6709	Projected	e0	LC	DNK
All-cause mortality	Denmark	Men	2023	79.6251	80.8057	81.9195	Projected	e0	LC	DNK
All-cause mortality	Denmark	Men	2024	79.7921	81.0172	82.1612	Projected	e0	LC	DNK
All-cause mortality	Denmark	Men	2025	79.948	81.2217	82.4045	Projected	e0	LC	DNK
All-cause mortality	Denmark	Men	2026	80.1039	81.424	82.6363	Projected	e0	LC	DNK
All-cause mortality	Denmark	Men	2027	80.2754	81.6256	82.8604	Projected	e0	LC	DNK
All-cause mortality	Denmark	Men	2028	80.4384	81.8272	83.0911	Projected	e0	LC	DNK
All-cause mortality	Denmark	Men	2029	80.6018	82.027	83.313	Projected	e0	LC	DNK
All-cause mortality	Denmark	Men	2030	80.7694	82.2194	83.5335	Projected	e0	LC	DNK
All-cause mortality	Denmark	Men	2031	80.9316	82.4076	83.7426	Projected	e0	LC	DNK
All-cause mortality	Denmark	Men	2032	81.1046	82.5967	83.9554	Projected	e0	LC	DNK
All-cause mortality	Denmark	Men	2033	81.258	82.7815	84.1624	Projected	e0	LC	DNK
All-cause mortality	Denmark	Men	2034	81.4242	82.9674	84.359	Projected	e0	LC	DNK
All-cause mortality	Denmark	Men	2035	81.589	83.1504	84.5609	Projected	e0	LC	DNK
All-cause mortality	Denmark	Men	2036	81.7542	83.3327	84.7494	Projected	e0	LC	DNK
All-cause mortality	Denmark	Men	2037	81.9105	83.5103	84.9395	Projected	e0	LC	DNK
All-cause mortality	Denmark	Men	2038	82.0726	83.6885	85.1293	Projected	e0	LC	DNK
All-cause mortality	Denmark	Men	2039	82.2364	83.8646	85.3143	Projected	e0	LC	DNK
All-cause mortality	Denmark	Men	2040	82.3961	84.0361	85.4928	Projected	e0	LC	DNK
All-cause mortality	Denmark	Men	2041	82.5519	84.2102	85.674	Projected	e0	LC	DNK
All-cause mortality	Denmark	Men	2042	82.7033	84.3793	85.8402	Projected	e0	LC	DNK
All-cause mortality	Denmark	Men	2043	82.8641	84.5448	86.0077	Projected	e0	LC	DNK
All-cause mortality	Denmark	Men	2044	83.0135	84.7078	86.1768	Projected	e0	LC	DNK
All-cause mortality	Denmark	Men	2045	83.1672	84.8694	86.351	Projected	e0	LC	DNK
All-cause mortality	Denmark	Men	2046	83.3234	85.0316	86.5114	Projected	e0	LC	DNK
All-cause mortality	Denmark	Men	2047	83.4814	85.1884	86.6736	Projected	e0	LC	DNK
All-cause mortality	Denmark	Men	2048	83.6339	85.3424	86.8245	Projected	e0	LC	DNK
All-cause mortality	Denmark	Men	2049	83.7888	85.4963	86.9851	Projected	e0	LC	DNK
All-cause mortality	Denmark	Men	2050	83.9333	85.6507	87.1405	Projected	e0	LC	DNK
All-cause mortality	Denmark	Men	2051	84.0816	85.8008	87.289	Projected	e0	LC	DNK
All-cause mortality	Denmark	Men	2052	84.2325	85.9495	87.4365	Projected	e0	LC	DNK
All-cause mortality	Denmark	Men	2053	84.3733	86.0969	87.5876	Projected	e0	LC	DNK
All-cause mortality	Denmark	Men	2054	84.5212	86.2409	87.7272	Projected	e0	LC	DNK
All-cause mortality	Denmark	Men	2055	84.6523	86.3862	87.8723	Projected	e0	LC	DNK
All-cause mortality	Denmark	Men	2056	84.7852	86.5254	88.0159	Projected	e0	LC	DNK
All-cause mortality	Denmark	Men	2057	84.9269	86.6632	88.148	Projected	e0	LC	DNK
All-cause mortality	Denmark	Men	2058	85.0706	86.8035	88.2871	Projected	e0	LC	DNK
All-cause mortality	Denmark	Men	2059	85.2051	86.9407	88.4185	Projected	e0	LC	DNK
All-cause mortality	Denmark	Men	2060	85.3419	87.078	88.548	Projected	e0	LC	DNK
All-cause mortality	Denmark	Men	2061	85.4765	87.2075	88.6832	Projected	e0	LC	DNK
All-cause mortality	Denmark	Men	2062	85.6113	87.338	88.8111	Projected	e0	LC	DNK
All-cause mortality	Denmark	Men	2063	85.7446	87.4697	88.9343	Projected	e0	LC	DNK
All-cause mortality	Denmark	Men	2064	85.8806	87.5963	89.0552	Projected	e0	LC	DNK
All-cause mortality	Denmark	Men	2065	86.0081	87.7237	89.1848	Projected	e0	LC	DNK
Non-lifestyle attributable mortality	Denmark	Men	1990		77.4574		Observed	e0	LC	DNK
Non-lifestyle attributable mortality	Denmark	Men	1991		77.6826		Observed	e0	LC	DNK
Non-lifestyle attributable mortality	Denmark	Men	1992		77.7839		Observed	e0	LC	DNK
Non-lifestyle attributable mortality	Denmark	Men	1993		77.9678		Observed	e0	LC	DNK
Non-lifestyle attributable mortality	Denmark	Men	1994		78.0471		Observed	e0	LC	DNK
Non-lifestyle attributable mortality	Denmark	Men	1995		77.899		Observed	e0	LC	DNK
Non-lifestyle attributable mortality	Denmark	Men	1996		78.3132		Observed	e0	LC	DNK
Non-lifestyle attributable mortality	Denmark	Men	1997		78.6419		Observed	e0	LC	DNK
Non-lifestyle attributable mortality	Denmark	Men	1998		78.8359		Observed	e0	LC	DNK
Non-lifestyle attributable mortality	Denmark	Men	1999		79.1871		Observed	e0	LC	DNK
Non-lifestyle attributable mortality	Denmark	Men	2000		79.4352		Observed	e0	LC	DNK
Non-lifestyle attributable mortality	Denmark	Men	2001		79.5093		Observed	e0	LC	DNK
Non-lifestyle attributable mortality	Denmark	Men	2002		79.5383		Observed	e0	LC	DNK
Non-lifestyle attributable mortality	Denmark	Men	2003		80.0979		Observed	e0	LC	DNK
Non-lifestyle attributable mortality	Denmark	Men	2004		79.9447		Observed	e0	LC	DNK
Non-lifestyle attributable mortality	Denmark	Men	2005		80.5279		Observed	e0	LC	DNK
Non-lifestyle attributable mortality	Denmark	Men	2006		80.6953		Observed	e0	LC	DNK
Non-lifestyle attributable mortality	Denmark	Men	2007		80.6034		Observed	e0	LC	DNK
Non-lifestyle attributable mortality	Denmark	Men	2008		81.0011		Observed	e0	LC	DNK
Non-lifestyle attributable mortality	Denmark	Men	2009		81.1069		Observed	e0	LC	DNK
Non-lifestyle attributable mortality	Denmark	Men	2010		81.3043		Observed	e0	LC	DNK
Non-lifestyle attributable mortality	Denmark	Men	2011		81.6645		Observed	e0	LC	DNK
Non-lifestyle attributable mortality	Denmark	Men	2012		82.0835		Observed	e0	LC	DNK
Non-lifestyle attributable mortality	Denmark	Men	2013		82.2302		Observed	e0	LC	DNK
Non-lifestyle attributable mortality	Denmark	Men	2014	82.3546	82.7015	83.0386	Projected	e0	LC	DNK
Non-lifestyle attributable mortality	Denmark	Men	2014		82.4395		Observed	e0	LC	DNK
Non-lifestyle attributable mortality	Denmark	Men	2015	82.39	82.8739	83.3422	Projected	e0	LC	DNK
Non-lifestyle attributable mortality	Denmark	Men	2016	82.4619	83.0478	83.6106	Projected	e0	LC	DNK
Non-lifestyle attributable mortality	Denmark	Men	2017	82.5433	83.2158	83.8648	Projected	e0	LC	DNK
Non-lifestyle attributable mortality	Denmark	Men	2018	82.6389	83.3833	84.0975	Projected	e0	LC	DNK
Non-lifestyle attributable mortality	Denmark	Men	2019	82.7432	83.5504	84.3251	Projected	e0	LC	DNK
Non-lifestyle attributable mortality	Denmark	Men	2020	82.8577	83.7158	84.5391	Projected	e0	LC	DNK
Non-lifestyle attributable mortality	Denmark	Men	2021	82.9656	83.8812	84.747	Projected	e0	LC	DNK
Non-lifestyle attributable mortality	Denmark	Men	2022	83.0837	84.0393	84.9429	Projected	e0	LC	DNK
Non-lifestyle attributable mortality	Denmark	Men	2023	83.1906	84.198	85.1352	Projected	e0	LC	DNK
Non-lifestyle attributable mortality	Denmark	Men	2024	83.3103	84.3543	85.3291	Projected	e0	LC	DNK
Non-lifestyle attributable mortality	Denmark	Men	2025	83.4311	84.5092	85.5149	Projected	e0	LC	DNK
Non-lifestyle attributable mortality	Denmark	Men	2026	83.5481	84.6632	85.6981	Projected	e0	LC	DNK
Non-lifestyle attributable mortality	Denmark	Men	2027	83.6581	84.8158	85.8776	Projected	e0	LC	DNK
Non-lifestyle attributable mortality	Denmark	Men	2028	83.79	84.9661	86.0476	Projected	e0	LC	DNK
Non-lifestyle attributable mortality	Denmark	Men	2029	83.9126	85.112	86.2145	Projected	e0	LC	DNK
Non-lifestyle attributable mortality	Denmark	Men	2030	84.0326	85.2609	86.3811	Projected	e0	LC	DNK
Non-lifestyle attributable mortality	Denmark	Men	2031	84.1579	85.4073	86.5403	Projected	e0	LC	DNK
Non-lifestyle attributable mortality	Denmark	Men	2032	84.278	85.5502	86.7039	Projected	e0	LC	DNK
Non-lifestyle attributable mortality	Denmark	Men	2033	84.408	85.6926	86.8676	Projected	e0	LC	DNK
Non-lifestyle attributable mortality	Denmark	Men	2034	84.5258	85.8357	87.0248	Projected	e0	LC	DNK
Non-lifestyle attributable mortality	Denmark	Men	2035	84.6461	85.9728	87.1824	Projected	e0	LC	DNK
Non-lifestyle attributable mortality	Denmark	Men	2036	84.7684	86.1119	87.3379	Projected	e0	LC	DNK
Non-lifestyle attributable mortality	Denmark	Men	2037	84.8878	86.2508	87.4845	Projected	e0	LC	DNK
Non-lifestyle attributable mortality	Denmark	Men	2038	85.0066	86.3844	87.6256	Projected	e0	LC	DNK
Non-lifestyle attributable mortality	Denmark	Men	2039	85.1321	86.5204	87.7654	Projected	e0	LC	DNK
Non-lifestyle attributable mortality	Denmark	Men	2040	85.2547	86.6509	87.9008	Projected	e0	LC	DNK
Non-lifestyle attributable mortality	Denmark	Men	2041	85.3717	86.7824	88.0378	Projected	e0	LC	DNK
Non-lifestyle attributable mortality	Denmark	Men	2042	85.4832	86.91	88.1836	Projected	e0	LC	DNK
Non-lifestyle attributable mortality	Denmark	Men	2043	85.6074	87.038	88.3191	Projected	e0	LC	DNK
Non-lifestyle attributable mortality	Denmark	Men	2044	85.7217	87.1632	88.4554	Projected	e0	LC	DNK
Non-lifestyle attributable mortality	Denmark	Men	2045	85.8427	87.288	88.5884	Projected	e0	LC	DNK
Non-lifestyle attributable mortality	Denmark	Men	2046	85.9536	87.4121	88.711	Projected	e0	LC	DNK
Non-lifestyle attributable mortality	Denmark	Men	2047	86.0751	87.5372	88.8409	Projected	e0	LC	DNK
Non-lifestyle attributable mortality	Denmark	Men	2048	86.1765	87.6588	88.9709	Projected	e0	LC	DNK
Non-lifestyle attributable mortality	Denmark	Men	2049	86.296	87.7824	89.092	Projected	e0	LC	DNK
Non-lifestyle attributable mortality	Denmark	Men	2050	86.4059	87.8992	89.2057	Projected	e0	LC	DNK
Non-lifestyle attributable mortality	Denmark	Men	2051	86.5237	88.0145	89.3245	Projected	e0	LC	DNK
Non-lifestyle attributable mortality	Denmark	Men	2052	86.6333	88.1273	89.4462	Projected	e0	LC	DNK
Non-lifestyle attributable mortality	Denmark	Men	2053	86.7535	88.2427	89.5666	Projected	e0	LC	DNK
Non-lifestyle attributable mortality	Denmark	Men	2054	86.8574	88.3556	89.6788	Projected	e0	LC	DNK
Non-lifestyle attributable mortality	Denmark	Men	2055	86.9642	88.4688	89.7955	Projected	e0	LC	DNK
Non-lifestyle attributable mortality	Denmark	Men	2056	87.0711	88.5811	89.9062	Projected	e0	LC	DNK
Non-lifestyle attributable mortality	Denmark	Men	2057	87.1747	88.6888	90.0197	Projected	e0	LC	DNK
Non-lifestyle attributable mortality	Denmark	Men	2058	87.2652	88.7962	90.1206	Projected	e0	LC	DNK
Non-lifestyle attributable mortality	Denmark	Men	2059	87.3816	88.9079	90.2235	Projected	e0	LC	DNK
Non-lifestyle attributable mortality	Denmark	Men	2060	87.487	89.0151	90.3373	Projected	e0	LC	DNK
Non-lifestyle attributable mortality	Denmark	Men	2061	87.5859	89.1197	90.437	Projected	e0	LC	DNK
Non-lifestyle attributable mortality	Denmark	Men	2062	87.6942	89.2263	90.5407	Projected	e0	LC	DNK
Non-lifestyle attributable mortality	Denmark	Men	2063	87.7947	89.3308	90.6513	Projected	e0	LC	DNK
Non-lifestyle attributable mortality	Denmark	Men	2064	87.9025	89.4329	90.7571	Projected	e0	LC	DNK
Non-lifestyle attributable mortality	Denmark	Men	2065	88.0044	89.5349	90.8604	Projected	e0	LC	DNK
Lifestyle + non-lifestyle attributable mortality	Denmark	Men	1990		72.0205		Observed	e0	LC	DNK
Lifestyle + non-lifestyle attributable mortality	Denmark	Men	1991		72.472		Observed	e0	LC	DNK
Lifestyle + non-lifestyle attributable mortality	Denmark	Men	1992		72.5603		Observed	e0	LC	DNK
Lifestyle + non-lifestyle attributable mortality	Denmark	Men	1993		72.593		Observed	e0	LC	DNK
Lifestyle + non-lifestyle attributable mortality	Denmark	Men	1994		72.7735		Observed	e0	LC	DNK
Lifestyle + non-lifestyle attributable mortality	Denmark	Men	1995		72.7262		Observed	e0	LC	DNK
Lifestyle + non-lifestyle attributable mortality	Denmark	Men	1996		73.051		Observed	e0	LC	DNK
Lifestyle + non-lifestyle attributable mortality	Denmark	Men	1997		73.5578		Observed	e0	LC	DNK
Lifestyle + non-lifestyle attributable mortality	Denmark	Men	1998		73.9403		Observed	e0	LC	DNK
Lifestyle + non-lifestyle attributable mortality	Denmark	Men	1999		74.2002		Observed	e0	LC	DNK
Lifestyle + non-lifestyle attributable mortality	Denmark	Men	2000		74.4346		Observed	e0	LC	DNK
Lifestyle + non-lifestyle attributable mortality	Denmark	Men	2001		74.6681		Observed	e0	LC	DNK
Lifestyle + non-lifestyle attributable mortality	Denmark	Men	2002		74.8		Observed	e0	LC	DNK
Lifestyle + non-lifestyle attributable mortality	Denmark	Men	2003		75.2804		Observed	e0	LC	DNK
Lifestyle + non-lifestyle attributable mortality	Denmark	Men	2004		75.1489		Observed	e0	LC	DNK
Lifestyle + non-lifestyle attributable mortality	Denmark	Men	2005		75.9334		Observed	e0	LC	DNK
Lifestyle + non-lifestyle attributable mortality	Denmark	Men	2006		75.8926		Observed	e0	LC	DNK
Lifestyle + non-lifestyle attributable mortality	Denmark	Men	2007		76.1261		Observed	e0	LC	DNK
Lifestyle + non-lifestyle attributable mortality	Denmark	Men	2008		76.4814		Observed	e0	LC	DNK
Lifestyle + non-lifestyle attributable mortality	Denmark	Men	2009		76.8442		Observed	e0	LC	DNK
Lifestyle + non-lifestyle attributable mortality	Denmark	Men	2010		77.1133		Observed	e0	LC	DNK
Lifestyle + non-lifestyle attributable mortality	Denmark	Men	2011		77.7073		Observed	e0	LC	DNK
Lifestyle + non-lifestyle attributable mortality	Denmark	Men	2012		78.0567		Observed	e0	LC	DNK
Lifestyle + non-lifestyle attributable mortality	Denmark	Men	2013		78.2629		Observed	e0	LC	DNK
Lifestyle + non-lifestyle attributable mortality	Denmark	Men	2014		78.5638		Observed	e0	LC	DNK
Lifestyle + non-lifestyle attributable mortality	Denmark	Men	2015	78.8596	79.4283	79.9817	Projected	e0	LC	DNK
Lifestyle + non-lifestyle attributable mortality	Denmark	Men	2016	78.989	79.8348	80.6131	Projected	e0	LC	DNK
Lifestyle + non-lifestyle attributable mortality	Denmark	Men	2017	79.0409	80.0913	81.0059	Projected	e0	LC	DNK
Lifestyle + non-lifestyle attributable mortality	Denmark	Men	2018	79.1107	80.3253	81.3426	Projected	e0	LC	DNK
Lifestyle + non-lifestyle attributable mortality	Denmark	Men	2019	79.2123	80.5619	81.657	Projected	e0	LC	DNK
Lifestyle + non-lifestyle attributable mortality	Denmark	Men	2020	79.344	80.8024	81.9689	Projected	e0	LC	DNK
Lifestyle + non-lifestyle attributable mortality	Denmark	Men	2021	79.4844	81.0345	82.253	Projected	e0	LC	DNK
Lifestyle + non-lifestyle attributable mortality	Denmark	Men	2022	79.6107	81.2635	82.5327	Projected	e0	LC	DNK
Lifestyle + non-lifestyle attributable mortality	Denmark	Men	2023	79.7774	81.4955	82.7923	Projected	e0	LC	DNK
Lifestyle + non-lifestyle attributable mortality	Denmark	Men	2024	79.9467	81.7158	83.0604	Projected	e0	LC	DNK
Lifestyle + non-lifestyle attributable mortality	Denmark	Men	2025	80.1078	81.9394	83.308	Projected	e0	LC	DNK
Lifestyle + non-lifestyle attributable mortality	Denmark	Men	2026	80.2712	82.1528	83.543	Projected	e0	LC	DNK
Lifestyle + non-lifestyle attributable mortality	Denmark	Men	2027	80.4566	82.3676	83.7879	Projected	e0	LC	DNK
Lifestyle + non-lifestyle attributable mortality	Denmark	Men	2028	80.6328	82.5775	84.0003	Projected	e0	LC	DNK
Lifestyle + non-lifestyle attributable mortality	Denmark	Men	2029	80.8073	82.7774	84.2336	Projected	e0	LC	DNK
Lifestyle + non-lifestyle attributable mortality	Denmark	Men	2030	80.9673	82.977	84.4456	Projected	e0	LC	DNK
Lifestyle + non-lifestyle attributable mortality	Denmark	Men	2031	81.1617	83.1733	84.6566	Projected	e0	LC	DNK
Lifestyle + non-lifestyle attributable mortality	Denmark	Men	2032	81.3465	83.3671	84.8585	Projected	e0	LC	DNK
Lifestyle + non-lifestyle attributable mortality	Denmark	Men	2033	81.5274	83.5613	85.061	Projected	e0	LC	DNK
Lifestyle + non-lifestyle attributable mortality	Denmark	Men	2034	81.6948	83.7446	85.2645	Projected	e0	LC	DNK
Lifestyle + non-lifestyle attributable mortality	Denmark	Men	2035	81.8554	83.9309	85.4612	Projected	e0	LC	DNK
Lifestyle + non-lifestyle attributable mortality	Denmark	Men	2036	82.0419	84.1147	85.6526	Projected	e0	LC	DNK
Lifestyle + non-lifestyle attributable mortality	Denmark	Men	2037	82.1849	84.2945	85.8363	Projected	e0	LC	DNK
Lifestyle + non-lifestyle attributable mortality	Denmark	Men	2038	82.3585	84.4707	86.0129	Projected	e0	LC	DNK
Lifestyle + non-lifestyle attributable mortality	Denmark	Men	2039	82.5246	84.6449	86.1841	Projected	e0	LC	DNK
Lifestyle + non-lifestyle attributable mortality	Denmark	Men	2040	82.6968	84.8119	86.359	Projected	e0	LC	DNK
Lifestyle + non-lifestyle attributable mortality	Denmark	Men	2041	82.8455	84.9833	86.5271	Projected	e0	LC	DNK
Lifestyle + non-lifestyle attributable mortality	Denmark	Men	2042	83.0056	85.1515	86.7005	Projected	e0	LC	DNK
Lifestyle + non-lifestyle attributable mortality	Denmark	Men	2043	83.164	85.3144	86.8649	Projected	e0	LC	DNK
Lifestyle + non-lifestyle attributable mortality	Denmark	Men	2044	83.3355	85.4718	87.0262	Projected	e0	LC	DNK
Lifestyle + non-lifestyle attributable mortality	Denmark	Men	2045	83.4804	85.6329	87.197	Projected	e0	LC	DNK
Lifestyle + non-lifestyle attributable mortality	Denmark	Men	2046	83.6497	85.7884	87.3623	Projected	e0	LC	DNK
Lifestyle + non-lifestyle attributable mortality	Denmark	Men	2047	83.8211	85.9467	87.516	Projected	e0	LC	DNK
Lifestyle + non-lifestyle attributable mortality	Denmark	Men	2048	83.9728	86.0985	87.6812	Projected	e0	LC	DNK
Lifestyle + non-lifestyle attributable mortality	Denmark	Men	2049	84.1409	86.2535	87.8266	Projected	e0	LC	DNK
Lifestyle + non-lifestyle attributable mortality	Denmark	Men	2050	84.3059	86.4004	87.9683	Projected	e0	LC	DNK
Lifestyle + non-lifestyle attributable mortality	Denmark	Men	2051	84.4554	86.5473	88.1184	Projected	e0	LC	DNK
Lifestyle + non-lifestyle attributable mortality	Denmark	Men	2052	84.6073	86.6946	88.2657	Projected	e0	LC	DNK
Lifestyle + non-lifestyle attributable mortality	Denmark	Men	2053	84.7515	86.835	88.4046	Projected	e0	LC	DNK
Lifestyle + non-lifestyle attributable mortality	Denmark	Men	2054	84.8996	86.9808	88.5539	Projected	e0	LC	DNK
Lifestyle + non-lifestyle attributable mortality	Denmark	Men	2055	85.0346	87.1233	88.6933	Projected	e0	LC	DNK
Lifestyle + non-lifestyle attributable mortality	Denmark	Men	2056	85.1785	87.2621	88.8335	Projected	e0	LC	DNK
Lifestyle + non-lifestyle attributable mortality	Denmark	Men	2057	85.3131	87.3994	88.9713	Projected	e0	LC	DNK
Lifestyle + non-lifestyle attributable mortality	Denmark	Men	2058	85.4614	87.5388	89.0945	Projected	e0	LC	DNK
Lifestyle + non-lifestyle attributable mortality	Denmark	Men	2059	85.612	87.6764	89.224	Projected	e0	LC	DNK
Lifestyle + non-lifestyle attributable mortality	Denmark	Men	2060	85.756	87.8089	89.354	Projected	e0	LC	DNK
Lifestyle + non-lifestyle attributable mortality	Denmark	Men	2061	85.9077	87.9474	89.4882	Projected	e0	LC	DNK
Lifestyle + non-lifestyle attributable mortality	Denmark	Men	2062	86.0456	88.081	89.6171	Projected	e0	LC	DNK
Lifestyle + non-lifestyle attributable mortality	Denmark	Men	2063	86.1892	88.2152	89.7544	Projected	e0	LC	DNK
Lifestyle + non-lifestyle attributable mortality	Denmark	Men	2064	86.3205	88.3434	89.8746	Projected	e0	LC	DNK
Lifestyle + non-lifestyle attributable mortality	Denmark	Men	2065	86.4495	88.4765	90.0031	Projected	e0	LC	DNK
All-cause mortality	Finland	Men	1990		70.9407		Observed	e0	LC	FIN
All-cause mortality	Finland	Men	1991		71.3346		Observed	e0	LC	FIN
All-cause mortality	Finland	Men	1992		71.672		Observed	e0	LC	FIN
All-cause mortality	Finland	Men	1993		72.1092		Observed	e0	LC	FIN
All-cause mortality	Finland	Men	1994		72.7911		Observed	e0	LC	FIN
All-cause mortality	Finland	Men	1995		72.8091		Observed	e0	LC	FIN
All-cause mortality	Finland	Men	1996		73.0303		Observed	e0	LC	FIN
All-cause mortality	Finland	Men	1997		73.4318		Observed	e0	LC	FIN
All-cause mortality	Finland	Men	1998		73.5117		Observed	e0	LC	FIN
All-cause mortality	Finland	Men	1999		73.7381		Observed	e0	LC	FIN
All-cause mortality	Finland	Men	2000		74.15		Observed	e0	LC	FIN
All-cause mortality	Finland	Men	2001		74.5755		Observed	e0	LC	FIN
All-cause mortality	Finland	Men	2002		74.8612		Observed	e0	LC	FIN
All-cause mortality	Finland	Men	2003		75.1247		Observed	e0	LC	FIN
All-cause mortality	Finland	Men	2004		75.3013		Observed	e0	LC	FIN
All-cause mortality	Finland	Men	2005		75.5281		Observed	e0	LC	FIN
All-cause mortality	Finland	Men	2006		75.8171		Observed	e0	LC	FIN
All-cause mortality	Finland	Men	2007		75.853		Observed	e0	LC	FIN
All-cause mortality	Finland	Men	2008		76.333		Observed	e0	LC	FIN
All-cause mortality	Finland	Men	2009		76.4761		Observed	e0	LC	FIN
All-cause mortality	Finland	Men	2010		76.7191		Observed	e0	LC	FIN
All-cause mortality	Finland	Men	2011		77.1877		Observed	e0	LC	FIN
All-cause mortality	Finland	Men	2012		77.5012		Observed	e0	LC	FIN
All-cause mortality	Finland	Men	2013		77.8735		Observed	e0	LC	FIN
All-cause mortality	Finland	Men	2014	77.851	78.1774	78.5008	Projected	e0	LC	FIN
All-cause mortality	Finland	Men	2014		78.1287		Observed	e0	LC	FIN
All-cause mortality	Finland	Men	2015	77.9733	78.4329	78.8849	Projected	e0	LC	FIN
All-cause mortality	Finland	Men	2016	78.1205	78.6863	79.2375	Projected	e0	LC	FIN
All-cause mortality	Finland	Men	2017	78.2982	78.9387	79.5683	Projected	e0	LC	FIN
All-cause mortality	Finland	Men	2018	78.4731	79.1867	79.8801	Projected	e0	LC	FIN
All-cause mortality	Finland	Men	2019	78.664	79.4336	80.1838	Projected	e0	LC	FIN
All-cause mortality	Finland	Men	2020	78.8459	79.6742	80.4712	Projected	e0	LC	FIN
All-cause mortality	Finland	Men	2021	79.0376	79.915	80.7602	Projected	e0	LC	FIN
All-cause mortality	Finland	Men	2022	79.2269	80.1575	81.0396	Projected	e0	LC	FIN
All-cause mortality	Finland	Men	2023	79.4334	80.3946	81.3156	Projected	e0	LC	FIN
All-cause mortality	Finland	Men	2024	79.6216	80.6281	81.5819	Projected	e0	LC	FIN
All-cause mortality	Finland	Men	2025	79.8249	80.8587	81.8471	Projected	e0	LC	FIN
All-cause mortality	Finland	Men	2026	80.015	81.089	82.1065	Projected	e0	LC	FIN
All-cause mortality	Finland	Men	2027	80.2101	81.3138	82.3593	Projected	e0	LC	FIN
All-cause mortality	Finland	Men	2028	80.4115	81.5392	82.6072	Projected	e0	LC	FIN
All-cause mortality	Finland	Men	2029	80.6025	81.7626	82.8531	Projected	e0	LC	FIN
All-cause mortality	Finland	Men	2030	80.7998	81.9823	83.0891	Projected	e0	LC	FIN
All-cause mortality	Finland	Men	2031	80.9973	82.1993	83.3272	Projected	e0	LC	FIN
All-cause mortality	Finland	Men	2032	81.1888	82.4162	83.5587	Projected	e0	LC	FIN
All-cause mortality	Finland	Men	2033	81.3911	82.628	83.7854	Projected	e0	LC	FIN
All-cause mortality	Finland	Men	2034	81.5867	82.8383	84.016	Projected	e0	LC	FIN
All-cause mortality	Finland	Men	2035	81.7806	83.0474	84.2351	Projected	e0	LC	FIN
All-cause mortality	Finland	Men	2036	81.9639	83.2544	84.4478	Projected	e0	LC	FIN
All-cause mortality	Finland	Men	2037	82.1507	83.4537	84.6727	Projected	e0	LC	FIN
All-cause mortality	Finland	Men	2038	82.3406	83.6563	84.8826	Projected	e0	LC	FIN
All-cause mortality	Finland	Men	2039	82.5304	83.8532	85.0807	Projected	e0	LC	FIN
All-cause mortality	Finland	Men	2040	82.7107	84.0517	85.2963	Projected	e0	LC	FIN
All-cause mortality	Finland	Men	2041	82.8969	84.2444	85.4912	Projected	e0	LC	FIN
All-cause mortality	Finland	Men	2042	83.0888	84.4397	85.6879	Projected	e0	LC	FIN
All-cause mortality	Finland	Men	2043	83.2663	84.6286	85.8893	Projected	e0	LC	FIN
All-cause mortality	Finland	Men	2044	83.4511	84.8136	86.076	Projected	e0	LC	FIN
All-cause mortality	Finland	Men	2045	83.629	85.0004	86.2651	Projected	e0	LC	FIN
All-cause mortality	Finland	Men	2046	83.8012	85.1825	86.4466	Projected	e0	LC	FIN
All-cause mortality	Finland	Men	2047	83.9802	85.3639	86.6275	Projected	e0	LC	FIN
All-cause mortality	Finland	Men	2048	84.151	85.5421	86.8131	Projected	e0	LC	FIN
All-cause mortality	Finland	Men	2049	84.3207	85.7169	86.9911	Projected	e0	LC	FIN
All-cause mortality	Finland	Men	2050	84.5001	85.8933	87.1663	Projected	e0	LC	FIN
All-cause mortality	Finland	Men	2051	84.6703	86.0641	87.3323	Projected	e0	LC	FIN
All-cause mortality	Finland	Men	2052	84.8392	86.2326	87.5031	Projected	e0	LC	FIN
All-cause mortality	Finland	Men	2053	85.0072	86.4015	87.6684	Projected	e0	LC	FIN
All-cause mortality	Finland	Men	2054	85.1747	86.5662	87.8304	Projected	e0	LC	FIN
All-cause mortality	Finland	Men	2055	85.3349	86.7297	87.9897	Projected	e0	LC	FIN
All-cause mortality	Finland	Men	2056	85.5012	86.8878	88.1512	Projected	e0	LC	FIN
All-cause mortality	Finland	Men	2057	85.6608	87.0484	88.31	Projected	e0	LC	FIN
All-cause mortality	Finland	Men	2058	85.8168	87.2083	88.4609	Projected	e0	LC	FIN
All-cause mortality	Finland	Men	2059	85.9569	87.3626	88.6073	Projected	e0	LC	FIN
All-cause mortality	Finland	Men	2060	86.1129	87.5171	88.7596	Projected	e0	LC	FIN
All-cause mortality	Finland	Men	2061	86.2679	87.6662	88.9091	Projected	e0	LC	FIN
All-cause mortality	Finland	Men	2062	86.4191	87.8126	89.0569	Projected	e0	LC	FIN
All-cause mortality	Finland	Men	2063	86.567	87.9591	89.1993	Projected	e0	LC	FIN
All-cause mortality	Finland	Men	2064	86.7202	88.108	89.3367	Projected	e0	LC	FIN
All-cause mortality	Finland	Men	2065	86.8631	88.2492	89.4736	Projected	e0	LC	FIN
Non-lifestyle attributable mortality	Finland	Men	1990		76.7344		Observed	e0	LC	FIN
Non-lifestyle attributable mortality	Finland	Men	1991		76.6557		Observed	e0	LC	FIN
Non-lifestyle attributable mortality	Finland	Men	1992		77.2168		Observed	e0	LC	FIN
Non-lifestyle attributable mortality	Finland	Men	1993		77.4236		Observed	e0	LC	FIN
Non-lifestyle attributable mortality	Finland	Men	1994		77.8212		Observed	e0	LC	FIN
Non-lifestyle attributable mortality	Finland	Men	1995		77.9017		Observed	e0	LC	FIN
Non-lifestyle attributable mortality	Finland	Men	1996		78.1513		Observed	e0	LC	FIN
Non-lifestyle attributable mortality	Finland	Men	1997		78.2793		Observed	e0	LC	FIN
Non-lifestyle attributable mortality	Finland	Men	1998		78.5111		Observed	e0	LC	FIN
Non-lifestyle attributable mortality	Finland	Men	1999		78.5152		Observed	e0	LC	FIN
Non-lifestyle attributable mortality	Finland	Men	2000		78.7977		Observed	e0	LC	FIN
Non-lifestyle attributable mortality	Finland	Men	2001		79.1807		Observed	e0	LC	FIN
Non-lifestyle attributable mortality	Finland	Men	2002		79.3507		Observed	e0	LC	FIN
Non-lifestyle attributable mortality	Finland	Men	2003		79.7594		Observed	e0	LC	FIN
Non-lifestyle attributable mortality	Finland	Men	2004		79.9425		Observed	e0	LC	FIN
Non-lifestyle attributable mortality	Finland	Men	2005		80.231		Observed	e0	LC	FIN
Non-lifestyle attributable mortality	Finland	Men	2006		80.3492		Observed	e0	LC	FIN
Non-lifestyle attributable mortality	Finland	Men	2007		80.3869		Observed	e0	LC	FIN
Non-lifestyle attributable mortality	Finland	Men	2008		80.8293		Observed	e0	LC	FIN
Non-lifestyle attributable mortality	Finland	Men	2009		80.856		Observed	e0	LC	FIN
Non-lifestyle attributable mortality	Finland	Men	2010		81.1304		Observed	e0	LC	FIN
Non-lifestyle attributable mortality	Finland	Men	2011		81.3501		Observed	e0	LC	FIN
Non-lifestyle attributable mortality	Finland	Men	2012		81.5704		Observed	e0	LC	FIN
Non-lifestyle attributable mortality	Finland	Men	2013		81.958		Observed	e0	LC	FIN
Non-lifestyle attributable mortality	Finland	Men	2014	81.7369	82.0237	82.3083	Projected	e0	LC	FIN
Non-lifestyle attributable mortality	Finland	Men	2014		81.9213		Observed	e0	LC	FIN
Non-lifestyle attributable mortality	Finland	Men	2015	81.8047	82.2072	82.6015	Projected	e0	LC	FIN
Non-lifestyle attributable mortality	Finland	Men	2016	81.8964	82.3886	82.8644	Projected	e0	LC	FIN
Non-lifestyle attributable mortality	Finland	Men	2017	82.0047	82.5646	83.1157	Projected	e0	LC	FIN
Non-lifestyle attributable mortality	Finland	Men	2018	82.117	82.743	83.3529	Projected	e0	LC	FIN
Non-lifestyle attributable mortality	Finland	Men	2019	82.2373	82.9206	83.5769	Projected	e0	LC	FIN
Non-lifestyle attributable mortality	Finland	Men	2020	82.3626	83.0949	83.8008	Projected	e0	LC	FIN
Non-lifestyle attributable mortality	Finland	Men	2021	82.4919	83.2663	84.0162	Projected	e0	LC	FIN
Non-lifestyle attributable mortality	Finland	Men	2022	82.6281	83.4364	84.2211	Projected	e0	LC	FIN
Non-lifestyle attributable mortality	Finland	Men	2023	82.7575	83.6049	84.4166	Projected	e0	LC	FIN
Non-lifestyle attributable mortality	Finland	Men	2024	82.8951	83.7736	84.6146	Projected	e0	LC	FIN
Non-lifestyle attributable mortality	Finland	Men	2025	83.0291	83.9408	84.8139	Projected	e0	LC	FIN
Non-lifestyle attributable mortality	Finland	Men	2026	83.167	84.1043	85.0078	Projected	e0	LC	FIN
Non-lifestyle attributable mortality	Finland	Men	2027	83.3042	84.2681	85.1955	Projected	e0	LC	FIN
Non-lifestyle attributable mortality	Finland	Men	2028	83.4321	84.4269	85.3723	Projected	e0	LC	FIN
Non-lifestyle attributable mortality	Finland	Men	2029	83.5665	84.5899	85.5568	Projected	e0	LC	FIN
Non-lifestyle attributable mortality	Finland	Men	2030	83.7068	84.7465	85.7305	Projected	e0	LC	FIN
Non-lifestyle attributable mortality	Finland	Men	2031	83.8435	84.9035	85.9044	Projected	e0	LC	FIN
Non-lifestyle attributable mortality	Finland	Men	2032	83.9768	85.0588	86.0676	Projected	e0	LC	FIN
Non-lifestyle attributable mortality	Finland	Men	2033	84.1141	85.2116	86.2363	Projected	e0	LC	FIN
Non-lifestyle attributable mortality	Finland	Men	2034	84.2487	85.3603	86.4021	Projected	e0	LC	FIN
Non-lifestyle attributable mortality	Finland	Men	2035	84.3804	85.5096	86.5735	Projected	e0	LC	FIN
Non-lifestyle attributable mortality	Finland	Men	2036	84.5156	85.6591	86.7337	Projected	e0	LC	FIN
Non-lifestyle attributable mortality	Finland	Men	2037	84.6447	85.8068	86.8919	Projected	e0	LC	FIN
Non-lifestyle attributable mortality	Finland	Men	2038	84.7835	85.9534	87.0462	Projected	e0	LC	FIN
Non-lifestyle attributable mortality	Finland	Men	2039	84.9166	86.0979	87.1954	Projected	e0	LC	FIN
Non-lifestyle attributable mortality	Finland	Men	2040	85.0438	86.2399	87.3463	Projected	e0	LC	FIN
Non-lifestyle attributable mortality	Finland	Men	2041	85.1779	86.3821	87.4991	Projected	e0	LC	FIN
Non-lifestyle attributable mortality	Finland	Men	2042	85.3061	86.5222	87.6487	Projected	e0	LC	FIN
Non-lifestyle attributable mortality	Finland	Men	2043	85.4356	86.6619	87.7887	Projected	e0	LC	FIN
Non-lifestyle attributable mortality	Finland	Men	2044	85.5614	86.7978	87.9335	Projected	e0	LC	FIN
Non-lifestyle attributable mortality	Finland	Men	2045	85.6875	86.9349	88.0755	Projected	e0	LC	FIN
Non-lifestyle attributable mortality	Finland	Men	2046	85.8229	87.0693	88.2099	Projected	e0	LC	FIN
Non-lifestyle attributable mortality	Finland	Men	2047	85.9485	87.2022	88.351	Projected	e0	LC	FIN
Non-lifestyle attributable mortality	Finland	Men	2048	86.0733	87.3354	88.4896	Projected	e0	LC	FIN
Non-lifestyle attributable mortality	Finland	Men	2049	86.1935	87.4655	88.62	Projected	e0	LC	FIN
Non-lifestyle attributable mortality	Finland	Men	2050	86.3198	87.5917	88.7511	Projected	e0	LC	FIN
Non-lifestyle attributable mortality	Finland	Men	2051	86.4382	87.7196	88.8816	Projected	e0	LC	FIN
Non-lifestyle attributable mortality	Finland	Men	2052	86.5663	87.8444	89.0077	Projected	e0	LC	FIN
Non-lifestyle attributable mortality	Finland	Men	2053	86.6879	87.9715	89.1335	Projected	e0	LC	FIN
Non-lifestyle attributable mortality	Finland	Men	2054	86.805	88.0961	89.2548	Projected	e0	LC	FIN
Non-lifestyle attributable mortality	Finland	Men	2055	86.9234	88.2155	89.3772	Projected	e0	LC	FIN
Non-lifestyle attributable mortality	Finland	Men	2056	87.0491	88.3371	89.4982	Projected	e0	LC	FIN
Non-lifestyle attributable mortality	Finland	Men	2057	87.1603	88.456	89.6288	Projected	e0	LC	FIN
Non-lifestyle attributable mortality	Finland	Men	2058	87.2793	88.5758	89.7462	Projected	e0	LC	FIN
Non-lifestyle attributable mortality	Finland	Men	2059	87.3973	88.6915	89.8647	Projected	e0	LC	FIN
Non-lifestyle attributable mortality	Finland	Men	2060	87.5041	88.8078	89.9801	Projected	e0	LC	FIN
Non-lifestyle attributable mortality	Finland	Men	2061	87.6212	88.9231	90.0881	Projected	e0	LC	FIN
Non-lifestyle attributable mortality	Finland	Men	2062	87.7397	89.034	90.2046	Projected	e0	LC	FIN
Non-lifestyle attributable mortality	Finland	Men	2063	87.8398	89.1442	90.3121	Projected	e0	LC	FIN
Non-lifestyle attributable mortality	Finland	Men	2064	87.9519	89.2567	90.4231	Projected	e0	LC	FIN
Non-lifestyle attributable mortality	Finland	Men	2065	88.0723	89.3664	90.5329	Projected	e0	LC	FIN
Lifestyle + non-lifestyle attributable mortality	Finland	Men	1990		70.9407		Observed	e0	LC	FIN
Lifestyle + non-lifestyle attributable mortality	Finland	Men	1991		71.3346		Observed	e0	LC	FIN
Lifestyle + non-lifestyle attributable mortality	Finland	Men	1992		71.672		Observed	e0	LC	FIN
Lifestyle + non-lifestyle attributable mortality	Finland	Men	1993		72.1092		Observed	e0	LC	FIN
Lifestyle + non-lifestyle attributable mortality	Finland	Men	1994		72.7911		Observed	e0	LC	FIN
Lifestyle + non-lifestyle attributable mortality	Finland	Men	1995		72.8091		Observed	e0	LC	FIN
Lifestyle + non-lifestyle attributable mortality	Finland	Men	1996		73.0303		Observed	e0	LC	FIN
Lifestyle + non-lifestyle attributable mortality	Finland	Men	1997		73.4318		Observed	e0	LC	FIN
Lifestyle + non-lifestyle attributable mortality	Finland	Men	1998		73.5117		Observed	e0	LC	FIN
Lifestyle + non-lifestyle attributable mortality	Finland	Men	1999		73.7381		Observed	e0	LC	FIN
Lifestyle + non-lifestyle attributable mortality	Finland	Men	2000		74.15		Observed	e0	LC	FIN
Lifestyle + non-lifestyle attributable mortality	Finland	Men	2001		74.5755		Observed	e0	LC	FIN
Lifestyle + non-lifestyle attributable mortality	Finland	Men	2002		74.8612		Observed	e0	LC	FIN
Lifestyle + non-lifestyle attributable mortality	Finland	Men	2003		75.1247		Observed	e0	LC	FIN
Lifestyle + non-lifestyle attributable mortality	Finland	Men	2004		75.3013		Observed	e0	LC	FIN
Lifestyle + non-lifestyle attributable mortality	Finland	Men	2005		75.5281		Observed	e0	LC	FIN
Lifestyle + non-lifestyle attributable mortality	Finland	Men	2006		75.8171		Observed	e0	LC	FIN
Lifestyle + non-lifestyle attributable mortality	Finland	Men	2007		75.853		Observed	e0	LC	FIN
Lifestyle + non-lifestyle attributable mortality	Finland	Men	2008		76.333		Observed	e0	LC	FIN
Lifestyle + non-lifestyle attributable mortality	Finland	Men	2009		76.4761		Observed	e0	LC	FIN
Lifestyle + non-lifestyle attributable mortality	Finland	Men	2010		76.7191		Observed	e0	LC	FIN
Lifestyle + non-lifestyle attributable mortality	Finland	Men	2011		77.1877		Observed	e0	LC	FIN
Lifestyle + non-lifestyle attributable mortality	Finland	Men	2012		77.5012		Observed	e0	LC	FIN
Lifestyle + non-lifestyle attributable mortality	Finland	Men	2013		77.8735		Observed	e0	LC	FIN
Lifestyle + non-lifestyle attributable mortality	Finland	Men	2014		78.1287		Observed	e0	LC	FIN
Lifestyle + non-lifestyle attributable mortality	Finland	Men	2015	77.9362	78.4197	78.895	Projected	e0	LC	FIN
Lifestyle + non-lifestyle attributable mortality	Finland	Men	2016	78.034	78.721	79.3675	Projected	e0	LC	FIN
Lifestyle + non-lifestyle attributable mortality	Finland	Men	2017	78.2632	79.0153	79.7347	Projected	e0	LC	FIN
Lifestyle + non-lifestyle attributable mortality	Finland	Men	2018	78.4468	79.2695	80.0608	Projected	e0	LC	FIN
Lifestyle + non-lifestyle attributable mortality	Finland	Men	2019	78.6214	79.5245	80.3781	Projected	e0	LC	FIN
Lifestyle + non-lifestyle attributable mortality	Finland	Men	2020	78.8081	79.7714	80.6771	Projected	e0	LC	FIN
Lifestyle + non-lifestyle attributable mortality	Finland	Men	2021	78.9901	80.0173	80.9771	Projected	e0	LC	FIN
Lifestyle + non-lifestyle attributable mortality	Finland	Men	2022	79.1776	80.2539	81.2609	Projected	e0	LC	FIN
Lifestyle + non-lifestyle attributable mortality	Finland	Men	2023	79.3756	80.4933	81.5324	Projected	e0	LC	FIN
Lifestyle + non-lifestyle attributable mortality	Finland	Men	2024	79.5686	80.7299	81.8113	Projected	e0	LC	FIN
Lifestyle + non-lifestyle attributable mortality	Finland	Men	2025	79.7585	80.9673	82.0744	Projected	e0	LC	FIN
Lifestyle + non-lifestyle attributable mortality	Finland	Men	2026	79.9638	81.1972	82.3486	Projected	e0	LC	FIN
Lifestyle + non-lifestyle attributable mortality	Finland	Men	2027	80.1651	81.4266	82.5962	Projected	e0	LC	FIN
Lifestyle + non-lifestyle attributable mortality	Finland	Men	2028	80.3594	81.6556	82.854	Projected	e0	LC	FIN
Lifestyle + non-lifestyle attributable mortality	Finland	Men	2029	80.5497	81.8814	83.1002	Projected	e0	LC	FIN
Lifestyle + non-lifestyle attributable mortality	Finland	Men	2030	80.7585	82.1035	83.3397	Projected	e0	LC	FIN
Lifestyle + non-lifestyle attributable mortality	Finland	Men	2031	80.9509	82.325	83.5715	Projected	e0	LC	FIN
Lifestyle + non-lifestyle attributable mortality	Finland	Men	2032	81.1602	82.5413	83.7984	Projected	e0	LC	FIN
Lifestyle + non-lifestyle attributable mortality	Finland	Men	2033	81.3661	82.7583	84.0305	Projected	e0	LC	FIN
Lifestyle + non-lifestyle attributable mortality	Finland	Men	2034	81.5648	82.9683	84.2506	Projected	e0	LC	FIN
Lifestyle + non-lifestyle attributable mortality	Finland	Men	2035	81.7656	83.1801	84.4709	Projected	e0	LC	FIN
Lifestyle + non-lifestyle attributable mortality	Finland	Men	2036	81.959	83.3838	84.6871	Projected	e0	LC	FIN
Lifestyle + non-lifestyle attributable mortality	Finland	Men	2037	82.1584	83.5906	84.9008	Projected	e0	LC	FIN
Lifestyle + non-lifestyle attributable mortality	Finland	Men	2038	82.3505	83.7913	85.108	Projected	e0	LC	FIN
Lifestyle + non-lifestyle attributable mortality	Finland	Men	2039	82.5465	83.9911	85.2992	Projected	e0	LC	FIN
Lifestyle + non-lifestyle attributable mortality	Finland	Men	2040	82.7372	84.1845	85.5112	Projected	e0	LC	FIN
Lifestyle + non-lifestyle attributable mortality	Finland	Men	2041	82.9243	84.3769	85.6994	Projected	e0	LC	FIN
Lifestyle + non-lifestyle attributable mortality	Finland	Men	2042	83.1038	84.5649	85.8949	Projected	e0	LC	FIN
Lifestyle + non-lifestyle attributable mortality	Finland	Men	2043	83.2926	84.7532	86.0834	Projected	e0	LC	FIN
Lifestyle + non-lifestyle attributable mortality	Finland	Men	2044	83.4685	84.9386	86.2761	Projected	e0	LC	FIN
Lifestyle + non-lifestyle attributable mortality	Finland	Men	2045	83.6436	85.1185	86.4546	Projected	e0	LC	FIN
Lifestyle + non-lifestyle attributable mortality	Finland	Men	2046	83.8238	85.2997	86.6354	Projected	e0	LC	FIN
Lifestyle + non-lifestyle attributable mortality	Finland	Men	2047	83.9931	85.4726	86.8182	Projected	e0	LC	FIN
Lifestyle + non-lifestyle attributable mortality	Finland	Men	2048	84.167	85.6512	86.9954	Projected	e0	LC	FIN
Lifestyle + non-lifestyle attributable mortality	Finland	Men	2049	84.3351	85.8219	87.1666	Projected	e0	LC	FIN
Lifestyle + non-lifestyle attributable mortality	Finland	Men	2050	84.5173	85.9918	87.3413	Projected	e0	LC	FIN
Lifestyle + non-lifestyle attributable mortality	Finland	Men	2051	84.6763	86.1596	87.5008	Projected	e0	LC	FIN
Lifestyle + non-lifestyle attributable mortality	Finland	Men	2052	84.8364	86.3252	87.6681	Projected	e0	LC	FIN
Lifestyle + non-lifestyle attributable mortality	Finland	Men	2053	85.0026	86.4893	87.8268	Projected	e0	LC	FIN
Lifestyle + non-lifestyle attributable mortality	Finland	Men	2054	85.1619	86.6524	87.9876	Projected	e0	LC	FIN
Lifestyle + non-lifestyle attributable mortality	Finland	Men	2055	85.3201	86.8122	88.1463	Projected	e0	LC	FIN
Lifestyle + non-lifestyle attributable mortality	Finland	Men	2056	85.4837	86.971	88.3064	Projected	e0	LC	FIN
Lifestyle + non-lifestyle attributable mortality	Finland	Men	2057	85.6316	87.125	88.4663	Projected	e0	LC	FIN
Lifestyle + non-lifestyle attributable mortality	Finland	Men	2058	85.7877	87.2776	88.6215	Projected	e0	LC	FIN
Lifestyle + non-lifestyle attributable mortality	Finland	Men	2059	85.9464	87.4301	88.7658	Projected	e0	LC	FIN
Lifestyle + non-lifestyle attributable mortality	Finland	Men	2060	86.0905	87.5748	88.9147	Projected	e0	LC	FIN
Lifestyle + non-lifestyle attributable mortality	Finland	Men	2061	86.2437	87.7259	89.0546	Projected	e0	LC	FIN
Lifestyle + non-lifestyle attributable mortality	Finland	Men	2062	86.3976	87.8695	89.2023	Projected	e0	LC	FIN
Lifestyle + non-lifestyle attributable mortality	Finland	Men	2063	86.5382	88.0118	89.3401	Projected	e0	LC	FIN
Lifestyle + non-lifestyle attributable mortality	Finland	Men	2064	86.6813	88.1551	89.476	Projected	e0	LC	FIN
Lifestyle + non-lifestyle attributable mortality	Finland	Men	2065	86.8213	88.2957	89.6122	Projected	e0	LC	FIN
All-cause mortality	France	Men	1990		72.7201		Observed	e0	LC	FRATNP
All-cause mortality	France	Men	1991		72.8756		Observed	e0	LC	FRATNP
All-cause mortality	France	Men	1992		73.1459		Observed	e0	LC	FRATNP
All-cause mortality	France	Men	1993		73.2453		Observed	e0	LC	FRATNP
All-cause mortality	France	Men	1994		73.6439		Observed	e0	LC	FRATNP
All-cause mortality	France	Men	1995		73.8333		Observed	e0	LC	FRATNP
All-cause mortality	France	Men	1996		74.0627		Observed	e0	LC	FRATNP
All-cause mortality	France	Men	1997		74.5056		Observed	e0	LC	FRATNP
All-cause mortality	France	Men	1998		74.7222		Observed	e0	LC	FRATNP
All-cause mortality	France	Men	1999		74.9391		Observed	e0	LC	FRATNP
All-cause mortality	France	Men	2000		75.235		Observed	e0	LC	FRATNP
All-cause mortality	France	Men	2001		75.4314		Observed	e0	LC	FRATNP
All-cause mortality	France	Men	2002		75.7063		Observed	e0	LC	FRATNP
All-cause mortality	France	Men	2003		75.809		Observed	e0	LC	FRATNP
All-cause mortality	France	Men	2004		76.6758		Observed	e0	LC	FRATNP
All-cause mortality	France	Men	2005		76.72		Observed	e0	LC	FRATNP
All-cause mortality	France	Men	2006		77.1623		Observed	e0	LC	FRATNP
All-cause mortality	France	Men	2007		77.3914		Observed	e0	LC	FRATNP
All-cause mortality	France	Men	2008		77.5963		Observed	e0	LC	FRATNP
All-cause mortality	France	Men	2009		77.7549		Observed	e0	LC	FRATNP
All-cause mortality	France	Men	2010		78.019		Observed	e0	LC	FRATNP
All-cause mortality	France	Men	2011		78.4308		Observed	e0	LC	FRATNP
All-cause mortality	France	Men	2012		78.4939		Observed	e0	LC	FRATNP
All-cause mortality	France	Men	2013		78.7713		Observed	e0	LC	FRATNP
All-cause mortality	France	Men	2014	79.1932	79.5661	79.9315	Projected	e0	LC	FRATNP
All-cause mortality	France	Men	2014		79.2806		Observed	e0	LC	FRATNP
All-cause mortality	France	Men	2015	79.2758	79.8025	80.3152	Projected	e0	LC	FRATNP
All-cause mortality	France	Men	2016	79.4089	80.0397	80.6575	Projected	e0	LC	FRATNP
All-cause mortality	France	Men	2017	79.5459	80.2712	80.9827	Projected	e0	LC	FRATNP
All-cause mortality	France	Men	2018	79.696	80.5028	81.2861	Projected	e0	LC	FRATNP
All-cause mortality	France	Men	2019	79.8533	80.7314	81.5756	Projected	e0	LC	FRATNP
All-cause mortality	France	Men	2020	80.0234	80.9569	81.857	Projected	e0	LC	FRATNP
All-cause mortality	France	Men	2021	80.1898	81.1806	82.1302	Projected	e0	LC	FRATNP
All-cause mortality	France	Men	2022	80.3614	81.4033	82.3991	Projected	e0	LC	FRATNP
All-cause mortality	France	Men	2023	80.5293	81.621	82.6692	Projected	e0	LC	FRATNP
All-cause mortality	France	Men	2024	80.7023	81.8376	82.928	Projected	e0	LC	FRATNP
All-cause mortality	France	Men	2025	80.8837	82.0521	83.1769	Projected	e0	LC	FRATNP
All-cause mortality	France	Men	2026	81.0625	82.2641	83.415	Projected	e0	LC	FRATNP
All-cause mortality	France	Men	2027	81.2356	82.4779	83.6569	Projected	e0	LC	FRATNP
All-cause mortality	France	Men	2028	81.4137	82.6866	83.8966	Projected	e0	LC	FRATNP
All-cause mortality	France	Men	2029	81.5891	82.8927	84.1317	Projected	e0	LC	FRATNP
All-cause mortality	France	Men	2030	81.7687	83.1013	84.3584	Projected	e0	LC	FRATNP
All-cause mortality	France	Men	2031	81.9439	83.3009	84.5783	Projected	e0	LC	FRATNP
All-cause mortality	France	Men	2032	82.1211	83.5017	84.8024	Projected	e0	LC	FRATNP
All-cause mortality	France	Men	2033	82.3028	83.7003	85.0223	Projected	e0	LC	FRATNP
All-cause mortality	France	Men	2034	82.4772	83.8965	85.2384	Projected	e0	LC	FRATNP
All-cause mortality	France	Men	2035	82.6516	84.0902	85.4508	Projected	e0	LC	FRATNP
All-cause mortality	France	Men	2036	82.833	84.286	85.6531	Projected	e0	LC	FRATNP
All-cause mortality	France	Men	2037	83.0025	84.4749	85.8588	Projected	e0	LC	FRATNP
All-cause mortality	France	Men	2038	83.1786	84.6635	86.0622	Projected	e0	LC	FRATNP
All-cause mortality	France	Men	2039	83.3513	84.8532	86.2603	Projected	e0	LC	FRATNP
All-cause mortality	France	Men	2040	83.5165	85.0376	86.4566	Projected	e0	LC	FRATNP
All-cause mortality	France	Men	2041	83.695	85.2196	86.654	Projected	e0	LC	FRATNP
All-cause mortality	France	Men	2042	83.8567	85.4052	86.8487	Projected	e0	LC	FRATNP
All-cause mortality	France	Men	2043	84.0238	85.583	87.0319	Projected	e0	LC	FRATNP
All-cause mortality	France	Men	2044	84.1885	85.7631	87.215	Projected	e0	LC	FRATNP
All-cause mortality	France	Men	2045	84.3483	85.9393	87.4012	Projected	e0	LC	FRATNP
All-cause mortality	France	Men	2046	84.5105	86.1119	87.5799	Projected	e0	LC	FRATNP
All-cause mortality	France	Men	2047	84.6687	86.2853	87.76	Projected	e0	LC	FRATNP
All-cause mortality	France	Men	2048	84.8373	86.4567	87.9275	Projected	e0	LC	FRATNP
All-cause mortality	France	Men	2049	85.0013	86.6257	88.108	Projected	e0	LC	FRATNP
All-cause mortality	France	Men	2050	85.1646	86.7923	88.2831	Projected	e0	LC	FRATNP
All-cause mortality	France	Men	2051	85.3339	86.9564	88.452	Projected	e0	LC	FRATNP
All-cause mortality	France	Men	2052	85.4816	87.1209	88.6146	Projected	e0	LC	FRATNP
All-cause mortality	France	Men	2053	85.6265	87.283	88.7798	Projected	e0	LC	FRATNP
All-cause mortality	France	Men	2054	85.7978	87.4439	88.9461	Projected	e0	LC	FRATNP
All-cause mortality	France	Men	2055	85.9466	87.5997	89.1114	Projected	e0	LC	FRATNP
All-cause mortality	France	Men	2056	86.1054	87.7589	89.2658	Projected	e0	LC	FRATNP
All-cause mortality	France	Men	2057	86.2513	87.914	89.4272	Projected	e0	LC	FRATNP
All-cause mortality	France	Men	2058	86.3945	88.0685	89.5863	Projected	e0	LC	FRATNP
All-cause mortality	France	Men	2059	86.5493	88.2242	89.7392	Projected	e0	LC	FRATNP
All-cause mortality	France	Men	2060	86.7011	88.3755	89.8872	Projected	e0	LC	FRATNP
All-cause mortality	France	Men	2061	86.8553	88.5262	90.0445	Projected	e0	LC	FRATNP
All-cause mortality	France	Men	2062	86.998	88.6753	90.1871	Projected	e0	LC	FRATNP
All-cause mortality	France	Men	2063	87.1495	88.8205	90.3308	Projected	e0	LC	FRATNP
All-cause mortality	France	Men	2064	87.2877	88.965	90.4754	Projected	e0	LC	FRATNP
All-cause mortality	France	Men	2065	87.4297	89.1094	90.619	Projected	e0	LC	FRATNP
Non-lifestyle attributable mortality	France	Men	1990		78.8101		Observed	e0	LC	FRATNP
Non-lifestyle attributable mortality	France	Men	1991		78.9572		Observed	e0	LC	FRATNP
Non-lifestyle attributable mortality	France	Men	1992		79.1931		Observed	e0	LC	FRATNP
Non-lifestyle attributable mortality	France	Men	1993		79.252		Observed	e0	LC	FRATNP
Non-lifestyle attributable mortality	France	Men	1994		79.562		Observed	e0	LC	FRATNP
Non-lifestyle attributable mortality	France	Men	1995		79.7054		Observed	e0	LC	FRATNP
Non-lifestyle attributable mortality	France	Men	1996		79.8524		Observed	e0	LC	FRATNP
Non-lifestyle attributable mortality	France	Men	1997		80.1856		Observed	e0	LC	FRATNP
Non-lifestyle attributable mortality	France	Men	1998		80.3787		Observed	e0	LC	FRATNP
Non-lifestyle attributable mortality	France	Men	1999		80.508		Observed	e0	LC	FRATNP
Non-lifestyle attributable mortality	France	Men	2000		80.6967		Observed	e0	LC	FRATNP
Non-lifestyle attributable mortality	France	Men	2001		80.8542		Observed	e0	LC	FRATNP
Non-lifestyle attributable mortality	France	Men	2002		81.0784		Observed	e0	LC	FRATNP
Non-lifestyle attributable mortality	France	Men	2003		81.0918		Observed	e0	LC	FRATNP
Non-lifestyle attributable mortality	France	Men	2004		81.852		Observed	e0	LC	FRATNP
Non-lifestyle attributable mortality	France	Men	2005		81.8759		Observed	e0	LC	FRATNP
Non-lifestyle attributable mortality	France	Men	2006		82.2677		Observed	e0	LC	FRATNP
Non-lifestyle attributable mortality	France	Men	2007		82.3995		Observed	e0	LC	FRATNP
Non-lifestyle attributable mortality	France	Men	2008		82.5112		Observed	e0	LC	FRATNP
Non-lifestyle attributable mortality	France	Men	2009		82.6581		Observed	e0	LC	FRATNP
Non-lifestyle attributable mortality	France	Men	2010		82.8439		Observed	e0	LC	FRATNP
Non-lifestyle attributable mortality	France	Men	2011		83.2028		Observed	e0	LC	FRATNP
Non-lifestyle attributable mortality	France	Men	2012		83.1301		Observed	e0	LC	FRATNP
Non-lifestyle attributable mortality	France	Men	2013		83.311		Observed	e0	LC	FRATNP
Non-lifestyle attributable mortality	France	Men	2014	83.7075	84.0303	84.3421	Projected	e0	LC	FRATNP
Non-lifestyle attributable mortality	France	Men	2014		83.759		Observed	e0	LC	FRATNP
Non-lifestyle attributable mortality	France	Men	2015	83.7525	84.2053	84.6416	Projected	e0	LC	FRATNP
Non-lifestyle attributable mortality	France	Men	2016	83.8303	84.3812	84.9113	Projected	e0	LC	FRATNP
Non-lifestyle attributable mortality	France	Men	2017	83.9202	84.5554	85.1624	Projected	e0	LC	FRATNP
Non-lifestyle attributable mortality	France	Men	2018	84.0229	84.7277	85.396	Projected	e0	LC	FRATNP
Non-lifestyle attributable mortality	France	Men	2019	84.1323	84.9	85.6249	Projected	e0	LC	FRATNP
Non-lifestyle attributable mortality	France	Men	2020	84.2397	85.0666	85.84	Projected	e0	LC	FRATNP
Non-lifestyle attributable mortality	France	Men	2021	84.3609	85.2329	86.055	Projected	e0	LC	FRATNP
Non-lifestyle attributable mortality	France	Men	2022	84.4778	85.3976	86.2492	Projected	e0	LC	FRATNP
Non-lifestyle attributable mortality	France	Men	2023	84.5996	85.5593	86.46	Projected	e0	LC	FRATNP
Non-lifestyle attributable mortality	France	Men	2024	84.7234	85.7214	86.6526	Projected	e0	LC	FRATNP
Non-lifestyle attributable mortality	France	Men	2025	84.8462	85.8813	86.8433	Projected	e0	LC	FRATNP
Non-lifestyle attributable mortality	France	Men	2026	84.9761	86.0381	87.0344	Projected	e0	LC	FRATNP
Non-lifestyle attributable mortality	France	Men	2027	85.1028	86.1971	87.2154	Projected	e0	LC	FRATNP
Non-lifestyle attributable mortality	France	Men	2028	85.2298	86.3506	87.3963	Projected	e0	LC	FRATNP
Non-lifestyle attributable mortality	France	Men	2029	85.3603	86.5041	87.5797	Projected	e0	LC	FRATNP
Non-lifestyle attributable mortality	France	Men	2030	85.4971	86.6564	87.7615	Projected	e0	LC	FRATNP
Non-lifestyle attributable mortality	France	Men	2031	85.615	86.8068	87.9221	Projected	e0	LC	FRATNP
Non-lifestyle attributable mortality	France	Men	2032	85.7524	86.9572	88.0915	Projected	e0	LC	FRATNP
Non-lifestyle attributable mortality	France	Men	2033	85.8728	87.1054	88.2623	Projected	e0	LC	FRATNP
Non-lifestyle attributable mortality	France	Men	2034	86.003	87.2534	88.4196	Projected	e0	LC	FRATNP
Non-lifestyle attributable mortality	France	Men	2035	86.1339	87.3963	88.5775	Projected	e0	LC	FRATNP
Non-lifestyle attributable mortality	France	Men	2036	86.2652	87.5413	88.7426	Projected	e0	LC	FRATNP
Non-lifestyle attributable mortality	France	Men	2037	86.3939	87.682	88.8978	Projected	e0	LC	FRATNP
Non-lifestyle attributable mortality	France	Men	2038	86.5129	87.8255	89.047	Projected	e0	LC	FRATNP
Non-lifestyle attributable mortality	France	Men	2039	86.6408	87.9648	89.1998	Projected	e0	LC	FRATNP
Non-lifestyle attributable mortality	France	Men	2040	86.7646	88.1031	89.3504	Projected	e0	LC	FRATNP
Non-lifestyle attributable mortality	France	Men	2041	86.8856	88.2401	89.4981	Projected	e0	LC	FRATNP
Non-lifestyle attributable mortality	France	Men	2042	87.0124	88.3758	89.6382	Projected	e0	LC	FRATNP
Non-lifestyle attributable mortality	France	Men	2043	87.1373	88.5126	89.7811	Projected	e0	LC	FRATNP
Non-lifestyle attributable mortality	France	Men	2044	87.2628	88.647	89.9214	Projected	e0	LC	FRATNP
Non-lifestyle attributable mortality	France	Men	2045	87.3912	88.7765	90.0676	Projected	e0	LC	FRATNP
Non-lifestyle attributable mortality	France	Men	2046	87.5127	88.9119	90.2085	Projected	e0	LC	FRATNP
Non-lifestyle attributable mortality	France	Men	2047	87.6293	89.0404	90.3433	Projected	e0	LC	FRATNP
Non-lifestyle attributable mortality	France	Men	2048	87.7531	89.1698	90.4799	Projected	e0	LC	FRATNP
Non-lifestyle attributable mortality	France	Men	2049	87.8689	89.2987	90.6039	Projected	e0	LC	FRATNP
Non-lifestyle attributable mortality	France	Men	2050	87.9879	89.4258	90.7375	Projected	e0	LC	FRATNP
Non-lifestyle attributable mortality	France	Men	2051	88.1051	89.5523	90.8611	Projected	e0	LC	FRATNP
Non-lifestyle attributable mortality	France	Men	2052	88.2249	89.6776	90.9883	Projected	e0	LC	FRATNP
Non-lifestyle attributable mortality	France	Men	2053	88.3434	89.801	91.1119	Projected	e0	LC	FRATNP
Non-lifestyle attributable mortality	France	Men	2054	88.472	89.9242	91.2348	Projected	e0	LC	FRATNP
Non-lifestyle attributable mortality	France	Men	2055	88.5794	90.0452	91.3575	Projected	e0	LC	FRATNP
Non-lifestyle attributable mortality	France	Men	2056	88.6904	90.1605	91.4797	Projected	e0	LC	FRATNP
Non-lifestyle attributable mortality	France	Men	2057	88.8019	90.2797	91.6037	Projected	e0	LC	FRATNP
Non-lifestyle attributable mortality	France	Men	2058	88.9198	90.3954	91.722	Projected	e0	LC	FRATNP
Non-lifestyle attributable mortality	France	Men	2059	89.0306	90.513	91.8403	Projected	e0	LC	FRATNP
Non-lifestyle attributable mortality	France	Men	2060	89.1452	90.6288	91.9552	Projected	e0	LC	FRATNP
Non-lifestyle attributable mortality	France	Men	2061	89.2564	90.7416	92.0773	Projected	e0	LC	FRATNP
Non-lifestyle attributable mortality	France	Men	2062	89.3634	90.8539	92.1911	Projected	e0	LC	FRATNP
Non-lifestyle attributable mortality	France	Men	2063	89.4742	90.966	92.3014	Projected	e0	LC	FRATNP
Non-lifestyle attributable mortality	France	Men	2064	89.5942	91.0778	92.4175	Projected	e0	LC	FRATNP
Non-lifestyle attributable mortality	France	Men	2065	89.6989	91.1887	92.5202	Projected	e0	LC	FRATNP
Lifestyle + non-lifestyle attributable mortality	France	Men	1990		72.7201		Observed	e0	LC	FRATNP
Lifestyle + non-lifestyle attributable mortality	France	Men	1991		72.8756		Observed	e0	LC	FRATNP
Lifestyle + non-lifestyle attributable mortality	France	Men	1992		73.1459		Observed	e0	LC	FRATNP
Lifestyle + non-lifestyle attributable mortality	France	Men	1993		73.2453		Observed	e0	LC	FRATNP
Lifestyle + non-lifestyle attributable mortality	France	Men	1994		73.6439		Observed	e0	LC	FRATNP
Lifestyle + non-lifestyle attributable mortality	France	Men	1995		73.8333		Observed	e0	LC	FRATNP
Lifestyle + non-lifestyle attributable mortality	France	Men	1996		74.0627		Observed	e0	LC	FRATNP
Lifestyle + non-lifestyle attributable mortality	France	Men	1997		74.5056		Observed	e0	LC	FRATNP
Lifestyle + non-lifestyle attributable mortality	France	Men	1998		74.7222		Observed	e0	LC	FRATNP
Lifestyle + non-lifestyle attributable mortality	France	Men	1999		74.9391		Observed	e0	LC	FRATNP
Lifestyle + non-lifestyle attributable mortality	France	Men	2000		75.235		Observed	e0	LC	FRATNP
Lifestyle + non-lifestyle attributable mortality	France	Men	2001		75.4314		Observed	e0	LC	FRATNP
Lifestyle + non-lifestyle attributable mortality	France	Men	2002		75.7063		Observed	e0	LC	FRATNP
Lifestyle + non-lifestyle attributable mortality	France	Men	2003		75.809		Observed	e0	LC	FRATNP
Lifestyle + non-lifestyle attributable mortality	France	Men	2004		76.6758		Observed	e0	LC	FRATNP
Lifestyle + non-lifestyle attributable mortality	France	Men	2005		76.72		Observed	e0	LC	FRATNP
Lifestyle + non-lifestyle attributable mortality	France	Men	2006		77.1623		Observed	e0	LC	FRATNP
Lifestyle + non-lifestyle attributable mortality	France	Men	2007		77.3914		Observed	e0	LC	FRATNP
Lifestyle + non-lifestyle attributable mortality	France	Men	2008		77.5963		Observed	e0	LC	FRATNP
Lifestyle + non-lifestyle attributable mortality	France	Men	2009		77.7549		Observed	e0	LC	FRATNP
Lifestyle + non-lifestyle attributable mortality	France	Men	2010		78.019		Observed	e0	LC	FRATNP
Lifestyle + non-lifestyle attributable mortality	France	Men	2011		78.4308		Observed	e0	LC	FRATNP
Lifestyle + non-lifestyle attributable mortality	France	Men	2012		78.4939		Observed	e0	LC	FRATNP
Lifestyle + non-lifestyle attributable mortality	France	Men	2013		78.7713		Observed	e0	LC	FRATNP
Lifestyle + non-lifestyle attributable mortality	France	Men	2014		79.2806		Observed	e0	LC	FRATNP
Lifestyle + non-lifestyle attributable mortality	France	Men	2015	79.4858	80.0201	80.5375	Projected	e0	LC	FRATNP
Lifestyle + non-lifestyle attributable mortality	France	Men	2016	79.5869	80.2492	80.8925	Projected	e0	LC	FRATNP
Lifestyle + non-lifestyle attributable mortality	France	Men	2017	79.7222	80.4951	81.2339	Projected	e0	LC	FRATNP
Lifestyle + non-lifestyle attributable mortality	France	Men	2018	79.8879	80.7417	81.5637	Projected	e0	LC	FRATNP
Lifestyle + non-lifestyle attributable mortality	France	Men	2019	80.0507	80.9871	81.8808	Projected	e0	LC	FRATNP
Lifestyle + non-lifestyle attributable mortality	France	Men	2020	80.2189	81.2289	82.1895	Projected	e0	LC	FRATNP
Lifestyle + non-lifestyle attributable mortality	France	Men	2021	80.4034	81.4708	82.4783	Projected	e0	LC	FRATNP
Lifestyle + non-lifestyle attributable mortality	France	Men	2022	80.5938	81.7106	82.7666	Projected	e0	LC	FRATNP
Lifestyle + non-lifestyle attributable mortality	France	Men	2023	80.7797	81.9523	83.0599	Projected	e0	LC	FRATNP
Lifestyle + non-lifestyle attributable mortality	France	Men	2024	80.9745	82.1896	83.3345	Projected	e0	LC	FRATNP
Lifestyle + non-lifestyle attributable mortality	France	Men	2025	81.1588	82.428	83.6105	Projected	e0	LC	FRATNP
Lifestyle + non-lifestyle attributable mortality	France	Men	2026	81.3602	82.6623	83.8828	Projected	e0	LC	FRATNP
Lifestyle + non-lifestyle attributable mortality	France	Men	2027	81.5673	82.8928	84.1448	Projected	e0	LC	FRATNP
Lifestyle + non-lifestyle attributable mortality	France	Men	2028	81.7636	83.1253	84.4017	Projected	e0	LC	FRATNP
Lifestyle + non-lifestyle attributable mortality	France	Men	2029	81.9599	83.3536	84.6628	Projected	e0	LC	FRATNP
Lifestyle + non-lifestyle attributable mortality	France	Men	2030	82.1602	83.5818	84.9201	Projected	e0	LC	FRATNP
Lifestyle + non-lifestyle attributable mortality	France	Men	2031	82.365	83.8062	85.1609	Projected	e0	LC	FRATNP
Lifestyle + non-lifestyle attributable mortality	France	Men	2032	82.5681	84.0313	85.4075	Projected	e0	LC	FRATNP
Lifestyle + non-lifestyle attributable mortality	France	Men	2033	82.7723	84.2514	85.6453	Projected	e0	LC	FRATNP
Lifestyle + non-lifestyle attributable mortality	France	Men	2034	82.9713	84.4706	85.8667	Projected	e0	LC	FRATNP
Lifestyle + non-lifestyle attributable mortality	France	Men	2035	83.1712	84.6873	86.0932	Projected	e0	LC	FRATNP
Lifestyle + non-lifestyle attributable mortality	France	Men	2036	83.3729	84.8989	86.3323	Projected	e0	LC	FRATNP
Lifestyle + non-lifestyle attributable mortality	France	Men	2037	83.565	85.1103	86.5552	Projected	e0	LC	FRATNP
Lifestyle + non-lifestyle attributable mortality	France	Men	2038	83.7576	85.3184	86.7766	Projected	e0	LC	FRATNP
Lifestyle + non-lifestyle attributable mortality	France	Men	2039	83.9524	85.5267	86.9886	Projected	e0	LC	FRATNP
Lifestyle + non-lifestyle attributable mortality	France	Men	2040	84.15	85.7311	87.2042	Projected	e0	LC	FRATNP
Lifestyle + non-lifestyle attributable mortality	France	Men	2041	84.3506	85.9312	87.4086	Projected	e0	LC	FRATNP
Lifestyle + non-lifestyle attributable mortality	France	Men	2042	84.5304	86.1287	87.6098	Projected	e0	LC	FRATNP
Lifestyle + non-lifestyle attributable mortality	France	Men	2043	84.7201	86.3254	87.8216	Projected	e0	LC	FRATNP
Lifestyle + non-lifestyle attributable mortality	France	Men	2044	84.9065	86.5223	88.0129	Projected	e0	LC	FRATNP
Lifestyle + non-lifestyle attributable mortality	France	Men	2045	85.0978	86.7091	88.2148	Projected	e0	LC	FRATNP
Lifestyle + non-lifestyle attributable mortality	France	Men	2046	85.2789	86.9032	88.4087	Projected	e0	LC	FRATNP
Lifestyle + non-lifestyle attributable mortality	France	Men	2047	85.4498	87.0882	88.602	Projected	e0	LC	FRATNP
Lifestyle + non-lifestyle attributable mortality	France	Men	2048	85.6345	87.2684	88.7809	Projected	e0	LC	FRATNP
Lifestyle + non-lifestyle attributable mortality	France	Men	2049	85.8089	87.4508	88.9584	Projected	e0	LC	FRATNP
Lifestyle + non-lifestyle attributable mortality	France	Men	2050	85.9823	87.6304	89.1373	Projected	e0	LC	FRATNP
Lifestyle + non-lifestyle attributable mortality	France	Men	2051	86.1445	87.8077	89.3093	Projected	e0	LC	FRATNP
Lifestyle + non-lifestyle attributable mortality	France	Men	2052	86.3175	87.9821	89.4844	Projected	e0	LC	FRATNP
Lifestyle + non-lifestyle attributable mortality	France	Men	2053	86.4849	88.1527	89.6563	Projected	e0	LC	FRATNP
Lifestyle + non-lifestyle attributable mortality	France	Men	2054	86.6674	88.3225	89.8254	Projected	e0	LC	FRATNP
Lifestyle + non-lifestyle attributable mortality	France	Men	2055	86.8194	88.4884	89.9854	Projected	e0	LC	FRATNP
Lifestyle + non-lifestyle attributable mortality	France	Men	2056	86.9726	88.6507	90.1512	Projected	e0	LC	FRATNP
Lifestyle + non-lifestyle attributable mortality	France	Men	2057	87.1347	88.8128	90.3158	Projected	e0	LC	FRATNP
Lifestyle + non-lifestyle attributable mortality	France	Men	2058	87.2891	88.9692	90.4752	Projected	e0	LC	FRATNP
Lifestyle + non-lifestyle attributable mortality	France	Men	2059	87.4417	89.1291	90.6288	Projected	e0	LC	FRATNP
Lifestyle + non-lifestyle attributable mortality	France	Men	2060	87.6102	89.2832	90.7807	Projected	e0	LC	FRATNP
Lifestyle + non-lifestyle attributable mortality	France	Men	2061	87.7578	89.4328	90.9343	Projected	e0	LC	FRATNP
Lifestyle + non-lifestyle attributable mortality	France	Men	2062	87.9089	89.5862	91.0861	Projected	e0	LC	FRATNP
Lifestyle + non-lifestyle attributable mortality	France	Men	2063	88.0594	89.7349	91.2307	Projected	e0	LC	FRATNP
Lifestyle + non-lifestyle attributable mortality	France	Men	2064	88.2171	89.8805	91.3752	Projected	e0	LC	FRATNP
Lifestyle + non-lifestyle attributable mortality	France	Men	2065	88.3648	90.0261	91.5077	Projected	e0	LC	FRATNP
All-cause mortality	Germany	Men	1990		71.9098		Observed	e0	LC	DEUTNP
All-cause mortality	Germany	Men	1991		72.0939		Observed	e0	LC	DEUTNP
All-cause mortality	Germany	Men	1992		72.5286		Observed	e0	LC	DEUTNP
All-cause mortality	Germany	Men	1993		72.6334		Observed	e0	LC	DEUTNP
All-cause mortality	Germany	Men	1994		72.9468		Observed	e0	LC	DEUTNP
All-cause mortality	Germany	Men	1995		73.1183		Observed	e0	LC	DEUTNP
All-cause mortality	Germany	Men	1996		73.4201		Observed	e0	LC	DEUTNP
All-cause mortality	Germany	Men	1997		73.8777		Observed	e0	LC	DEUTNP
All-cause mortality	Germany	Men	1998		74.3144		Observed	e0	LC	DEUTNP
All-cause mortality	Germany	Men	1999		74.5748		Observed	e0	LC	DEUTNP
All-cause mortality	Germany	Men	2000		74.8565		Observed	e0	LC	DEUTNP
All-cause mortality	Germany	Men	2001		75.2753		Observed	e0	LC	DEUTNP
All-cause mortality	Germany	Men	2002		75.439		Observed	e0	LC	DEUTNP
All-cause mortality	Germany	Men	2003		75.514		Observed	e0	LC	DEUTNP
All-cause mortality	Germany	Men	2004		76.1484		Observed	e0	LC	DEUTNP
All-cause mortality	Germany	Men	2005		76.3549		Observed	e0	LC	DEUTNP
All-cause mortality	Germany	Men	2006		76.7511		Observed	e0	LC	DEUTNP
All-cause mortality	Germany	Men	2007		76.9116		Observed	e0	LC	DEUTNP
All-cause mortality	Germany	Men	2008		77.1052		Observed	e0	LC	DEUTNP
All-cause mortality	Germany	Men	2009		77.2337		Observed	e0	LC	DEUTNP
All-cause mortality	Germany	Men	2010		77.4334		Observed	e0	LC	DEUTNP
All-cause mortality	Germany	Men	2011		77.7714		Observed	e0	LC	DEUTNP
All-cause mortality	Germany	Men	2012		77.9655		Observed	e0	LC	DEUTNP
All-cause mortality	Germany	Men	2013		77.9827		Observed	e0	LC	DEUTNP
All-cause mortality	Germany	Men	2014	78.4534	78.74	79.0256	Projected	e0	LC	DEUTNP
All-cause mortality	Germany	Men	2014		78.4329		Observed	e0	LC	DEUTNP
All-cause mortality	Germany	Men	2015	78.5805	78.9846	79.3812	Projected	e0	LC	DEUTNP
All-cause mortality	Germany	Men	2016	78.7365	79.2236	79.7082	Projected	e0	LC	DEUTNP
All-cause mortality	Germany	Men	2017	78.9063	79.4618	80.0087	Projected	e0	LC	DEUTNP
All-cause mortality	Germany	Men	2018	79.0761	79.7	80.3037	Projected	e0	LC	DEUTNP
All-cause mortality	Germany	Men	2019	79.2597	79.9344	80.5832	Projected	e0	LC	DEUTNP
All-cause mortality	Germany	Men	2020	79.446	80.1651	80.8605	Projected	e0	LC	DEUTNP
All-cause mortality	Germany	Men	2021	79.6332	80.3928	81.1312	Projected	e0	LC	DEUTNP
All-cause mortality	Germany	Men	2022	79.8237	80.6204	81.3937	Projected	e0	LC	DEUTNP
All-cause mortality	Germany	Men	2023	80.0145	80.845	81.6524	Projected	e0	LC	DEUTNP
All-cause mortality	Germany	Men	2024	80.1969	81.0685	81.909	Projected	e0	LC	DEUTNP
All-cause mortality	Germany	Men	2025	80.3905	81.2901	82.1551	Projected	e0	LC	DEUTNP
All-cause mortality	Germany	Men	2026	80.5776	81.5075	82.3966	Projected	e0	LC	DEUTNP
All-cause mortality	Germany	Men	2027	80.7631	81.7214	82.6371	Projected	e0	LC	DEUTNP
All-cause mortality	Germany	Men	2028	80.9509	81.9363	82.8729	Projected	e0	LC	DEUTNP
All-cause mortality	Germany	Men	2029	81.1433	82.1485	83.1026	Projected	e0	LC	DEUTNP
All-cause mortality	Germany	Men	2030	81.3303	82.3571	83.3247	Projected	e0	LC	DEUTNP
All-cause mortality	Germany	Men	2031	81.5207	82.5616	83.5537	Projected	e0	LC	DEUTNP
All-cause mortality	Germany	Men	2032	81.7044	82.7656	83.7709	Projected	e0	LC	DEUTNP
All-cause mortality	Germany	Men	2033	81.8934	82.9675	83.9861	Projected	e0	LC	DEUTNP
All-cause mortality	Germany	Men	2034	82.0702	83.1685	84.1989	Projected	e0	LC	DEUTNP
All-cause mortality	Germany	Men	2035	82.259	83.3659	84.4117	Projected	e0	LC	DEUTNP
All-cause mortality	Germany	Men	2036	82.4402	83.5611	84.6115	Projected	e0	LC	DEUTNP
All-cause mortality	Germany	Men	2037	82.6219	83.7538	84.8166	Projected	e0	LC	DEUTNP
All-cause mortality	Germany	Men	2038	82.8045	83.9471	85.0201	Projected	e0	LC	DEUTNP
All-cause mortality	Germany	Men	2039	82.982	84.1366	85.2211	Projected	e0	LC	DEUTNP
All-cause mortality	Germany	Men	2040	83.1567	84.3231	85.4186	Projected	e0	LC	DEUTNP
All-cause mortality	Germany	Men	2041	83.3328	84.5089	85.6111	Projected	e0	LC	DEUTNP
All-cause mortality	Germany	Men	2042	83.5072	84.6928	85.8017	Projected	e0	LC	DEUTNP
All-cause mortality	Germany	Men	2043	83.6764	84.8737	85.9855	Projected	e0	LC	DEUTNP
All-cause mortality	Germany	Men	2044	83.8473	85.0515	86.1715	Projected	e0	LC	DEUTNP
All-cause mortality	Germany	Men	2045	84.0198	85.2266	86.3502	Projected	e0	LC	DEUTNP
All-cause mortality	Germany	Men	2046	84.1875	85.4011	86.53	Projected	e0	LC	DEUTNP
All-cause mortality	Germany	Men	2047	84.3446	85.5736	86.7132	Projected	e0	LC	DEUTNP
All-cause mortality	Germany	Men	2048	84.5164	85.7447	86.8868	Projected	e0	LC	DEUTNP
All-cause mortality	Germany	Men	2049	84.6811	85.9149	87.0523	Projected	e0	LC	DEUTNP
All-cause mortality	Germany	Men	2050	84.8439	86.0821	87.2179	Projected	e0	LC	DEUTNP
All-cause mortality	Germany	Men	2051	85.0115	86.2478	87.3863	Projected	e0	LC	DEUTNP
All-cause mortality	Germany	Men	2052	85.168	86.4092	87.5506	Projected	e0	LC	DEUTNP
All-cause mortality	Germany	Men	2053	85.3283	86.5698	87.7148	Projected	e0	LC	DEUTNP
All-cause mortality	Germany	Men	2054	85.4878	86.732	87.8696	Projected	e0	LC	DEUTNP
All-cause mortality	Germany	Men	2055	85.6516	86.8894	88.0302	Projected	e0	LC	DEUTNP
All-cause mortality	Germany	Men	2056	85.8085	87.0429	88.1842	Projected	e0	LC	DEUTNP
All-cause mortality	Germany	Men	2057	85.969	87.1983	88.3403	Projected	e0	LC	DEUTNP
All-cause mortality	Germany	Men	2058	86.1123	87.3511	88.4881	Projected	e0	LC	DEUTNP
All-cause mortality	Germany	Men	2059	86.2645	87.4999	88.6379	Projected	e0	LC	DEUTNP
All-cause mortality	Germany	Men	2060	86.4164	87.6489	88.7808	Projected	e0	LC	DEUTNP
All-cause mortality	Germany	Men	2061	86.5646	87.7936	88.9196	Projected	e0	LC	DEUTNP
All-cause mortality	Germany	Men	2062	86.7084	87.9392	89.0639	Projected	e0	LC	DEUTNP
All-cause mortality	Germany	Men	2063	86.854	88.0811	89.2041	Projected	e0	LC	DEUTNP
All-cause mortality	Germany	Men	2064	86.9978	88.219	89.3486	Projected	e0	LC	DEUTNP
All-cause mortality	Germany	Men	2065	87.14	88.3561	89.4813	Projected	e0	LC	DEUTNP
Non-lifestyle attributable mortality	Germany	Men	1990		77.5499		Observed	e0	LC	DEUTNP
Non-lifestyle attributable mortality	Germany	Men	1991		77.7846		Observed	e0	LC	DEUTNP
Non-lifestyle attributable mortality	Germany	Men	1992		78.2031		Observed	e0	LC	DEUTNP
Non-lifestyle attributable mortality	Germany	Men	1993		78.2759		Observed	e0	LC	DEUTNP
Non-lifestyle attributable mortality	Germany	Men	1994		78.5042		Observed	e0	LC	DEUTNP
Non-lifestyle attributable mortality	Germany	Men	1995		78.6569		Observed	e0	LC	DEUTNP
Non-lifestyle attributable mortality	Germany	Men	1996		78.8187		Observed	e0	LC	DEUTNP
Non-lifestyle attributable mortality	Germany	Men	1997		79.1874		Observed	e0	LC	DEUTNP
Non-lifestyle attributable mortality	Germany	Men	1998		79.5011		Observed	e0	LC	DEUTNP
Non-lifestyle attributable mortality	Germany	Men	1999		79.6295		Observed	e0	LC	DEUTNP
Non-lifestyle attributable mortality	Germany	Men	2000		79.9215		Observed	e0	LC	DEUTNP
Non-lifestyle attributable mortality	Germany	Men	2001		80.1977		Observed	e0	LC	DEUTNP
Non-lifestyle attributable mortality	Germany	Men	2002		80.2987		Observed	e0	LC	DEUTNP
Non-lifestyle attributable mortality	Germany	Men	2003		80.2974		Observed	e0	LC	DEUTNP
Non-lifestyle attributable mortality	Germany	Men	2004		80.8492		Observed	e0	LC	DEUTNP
Non-lifestyle attributable mortality	Germany	Men	2005		80.9809		Observed	e0	LC	DEUTNP
Non-lifestyle attributable mortality	Germany	Men	2006		81.2782		Observed	e0	LC	DEUTNP
Non-lifestyle attributable mortality	Germany	Men	2007		81.3619		Observed	e0	LC	DEUTNP
Non-lifestyle attributable mortality	Germany	Men	2008		81.5114		Observed	e0	LC	DEUTNP
Non-lifestyle attributable mortality	Germany	Men	2009		81.5521		Observed	e0	LC	DEUTNP
Non-lifestyle attributable mortality	Germany	Men	2010		81.6919		Observed	e0	LC	DEUTNP
Non-lifestyle attributable mortality	Germany	Men	2011		82.0109		Observed	e0	LC	DEUTNP
Non-lifestyle attributable mortality	Germany	Men	2012		82.1603		Observed	e0	LC	DEUTNP
Non-lifestyle attributable mortality	Germany	Men	2013		82.1418		Observed	e0	LC	DEUTNP
Non-lifestyle attributable mortality	Germany	Men	2014	82.5226	82.7812	83.0354	Projected	e0	LC	DEUTNP
Non-lifestyle attributable mortality	Germany	Men	2014		82.5386		Observed	e0	LC	DEUTNP
Non-lifestyle attributable mortality	Germany	Men	2015	82.6015	82.9645	83.318	Projected	e0	LC	DEUTNP
Non-lifestyle attributable mortality	Germany	Men	2016	82.7041	83.1447	83.5728	Projected	e0	LC	DEUTNP
Non-lifestyle attributable mortality	Germany	Men	2017	82.8221	83.3238	83.8164	Projected	e0	LC	DEUTNP
Non-lifestyle attributable mortality	Germany	Men	2018	82.9433	83.5021	84.0435	Projected	e0	LC	DEUTNP
Non-lifestyle attributable mortality	Germany	Men	2019	83.0694	83.6782	84.2621	Projected	e0	LC	DEUTNP
Non-lifestyle attributable mortality	Germany	Men	2020	83.2018	83.8525	84.4735	Projected	e0	LC	DEUTNP
Non-lifestyle attributable mortality	Germany	Men	2021	83.3343	84.0233	84.6834	Projected	e0	LC	DEUTNP
Non-lifestyle attributable mortality	Germany	Men	2022	83.472	84.1974	84.892	Projected	e0	LC	DEUTNP
Non-lifestyle attributable mortality	Germany	Men	2023	83.6138	84.3671	85.0887	Projected	e0	LC	DEUTNP
Non-lifestyle attributable mortality	Germany	Men	2024	83.7473	84.5348	85.2835	Projected	e0	LC	DEUTNP
Non-lifestyle attributable mortality	Germany	Men	2025	83.8843	84.6999	85.4792	Projected	e0	LC	DEUTNP
Non-lifestyle attributable mortality	Germany	Men	2026	84.0236	84.8625	85.6638	Projected	e0	LC	DEUTNP
Non-lifestyle attributable mortality	Germany	Men	2027	84.17	85.0255	85.8478	Projected	e0	LC	DEUTNP
Non-lifestyle attributable mortality	Germany	Men	2028	84.3069	85.1848	86.0304	Projected	e0	LC	DEUTNP
Non-lifestyle attributable mortality	Germany	Men	2029	84.4477	85.3468	86.2146	Projected	e0	LC	DEUTNP
Non-lifestyle attributable mortality	Germany	Men	2030	84.5832	85.5049	86.3858	Projected	e0	LC	DEUTNP
Non-lifestyle attributable mortality	Germany	Men	2031	84.7231	85.663	86.5587	Projected	e0	LC	DEUTNP
Non-lifestyle attributable mortality	Germany	Men	2032	84.8606	85.8169	86.7291	Projected	e0	LC	DEUTNP
Non-lifestyle attributable mortality	Germany	Men	2033	84.9955	85.9705	86.8959	Projected	e0	LC	DEUTNP
Non-lifestyle attributable mortality	Germany	Men	2034	85.1334	86.124	87.0603	Projected	e0	LC	DEUTNP
Non-lifestyle attributable mortality	Germany	Men	2035	85.2709	86.2761	87.219	Projected	e0	LC	DEUTNP
Non-lifestyle attributable mortality	Germany	Men	2036	85.4101	86.4253	87.3754	Projected	e0	LC	DEUTNP
Non-lifestyle attributable mortality	Germany	Men	2037	85.5503	86.5734	87.5335	Projected	e0	LC	DEUTNP
Non-lifestyle attributable mortality	Germany	Men	2038	85.6799	86.7175	87.691	Projected	e0	LC	DEUTNP
Non-lifestyle attributable mortality	Germany	Men	2039	85.8147	86.8651	87.8466	Projected	e0	LC	DEUTNP
Non-lifestyle attributable mortality	Germany	Men	2040	85.9451	87.0047	87.9953	Projected	e0	LC	DEUTNP
Non-lifestyle attributable mortality	Germany	Men	2041	86.075	87.1484	88.1396	Projected	e0	LC	DEUTNP
Non-lifestyle attributable mortality	Germany	Men	2042	86.2013	87.2883	88.2854	Projected	e0	LC	DEUTNP
Non-lifestyle attributable mortality	Germany	Men	2043	86.3329	87.4297	88.4356	Projected	e0	LC	DEUTNP
Non-lifestyle attributable mortality	Germany	Men	2044	86.4624	87.5674	88.5762	Projected	e0	LC	DEUTNP
Non-lifestyle attributable mortality	Germany	Men	2045	86.5906	87.7016	88.7214	Projected	e0	LC	DEUTNP
Non-lifestyle attributable mortality	Germany	Men	2046	86.7224	87.8368	88.864	Projected	e0	LC	DEUTNP
Non-lifestyle attributable mortality	Germany	Men	2047	86.8525	87.9698	88.998	Projected	e0	LC	DEUTNP
Non-lifestyle attributable mortality	Germany	Men	2048	86.9785	88.1007	89.1367	Projected	e0	LC	DEUTNP
Non-lifestyle attributable mortality	Germany	Men	2049	87.1049	88.2325	89.2712	Projected	e0	LC	DEUTNP
Non-lifestyle attributable mortality	Germany	Men	2050	87.2322	88.3598	89.4022	Projected	e0	LC	DEUTNP
Non-lifestyle attributable mortality	Germany	Men	2051	87.3511	88.4886	89.5344	Projected	e0	LC	DEUTNP
Non-lifestyle attributable mortality	Germany	Men	2052	87.4729	88.6155	89.6669	Projected	e0	LC	DEUTNP
Non-lifestyle attributable mortality	Germany	Men	2053	87.5969	88.7414	89.792	Projected	e0	LC	DEUTNP
Non-lifestyle attributable mortality	Germany	Men	2054	87.7153	88.8637	89.9119	Projected	e0	LC	DEUTNP
Non-lifestyle attributable mortality	Germany	Men	2055	87.8426	88.9881	90.036	Projected	e0	LC	DEUTNP
Non-lifestyle attributable mortality	Germany	Men	2056	87.9576	89.1108	90.1606	Projected	e0	LC	DEUTNP
Non-lifestyle attributable mortality	Germany	Men	2057	88.082	89.228	90.2791	Projected	e0	LC	DEUTNP
Non-lifestyle attributable mortality	Germany	Men	2058	88.1973	89.3483	90.3921	Projected	e0	LC	DEUTNP
Non-lifestyle attributable mortality	Germany	Men	2059	88.3077	89.4656	90.5095	Projected	e0	LC	DEUTNP
Non-lifestyle attributable mortality	Germany	Men	2060	88.424	89.5826	90.6278	Projected	e0	LC	DEUTNP
Non-lifestyle attributable mortality	Germany	Men	2061	88.5354	89.6955	90.7407	Projected	e0	LC	DEUTNP
Non-lifestyle attributable mortality	Germany	Men	2062	88.6491	89.8082	90.8507	Projected	e0	LC	DEUTNP
Non-lifestyle attributable mortality	Germany	Men	2063	88.7607	89.9214	90.966	Projected	e0	LC	DEUTNP
Non-lifestyle attributable mortality	Germany	Men	2064	88.8661	90.0322	91.0721	Projected	e0	LC	DEUTNP
Non-lifestyle attributable mortality	Germany	Men	2065	88.9833	90.1441	91.1769	Projected	e0	LC	DEUTNP
Lifestyle + non-lifestyle attributable mortality	Germany	Men	1990		71.9098		Observed	e0	LC	DEUTNP
Lifestyle + non-lifestyle attributable mortality	Germany	Men	1991		72.0939		Observed	e0	LC	DEUTNP
Lifestyle + non-lifestyle attributable mortality	Germany	Men	1992		72.5286		Observed	e0	LC	DEUTNP
Lifestyle + non-lifestyle attributable mortality	Germany	Men	1993		72.6334		Observed	e0	LC	DEUTNP
Lifestyle + non-lifestyle attributable mortality	Germany	Men	1994		72.9468		Observed	e0	LC	DEUTNP
Lifestyle + non-lifestyle attributable mortality	Germany	Men	1995		73.1183		Observed	e0	LC	DEUTNP
Lifestyle + non-lifestyle attributable mortality	Germany	Men	1996		73.4201		Observed	e0	LC	DEUTNP
Lifestyle + non-lifestyle attributable mortality	Germany	Men	1997		73.8777		Observed	e0	LC	DEUTNP
Lifestyle + non-lifestyle attributable mortality	Germany	Men	1998		74.3144		Observed	e0	LC	DEUTNP
Lifestyle + non-lifestyle attributable mortality	Germany	Men	1999		74.5748		Observed	e0	LC	DEUTNP
Lifestyle + non-lifestyle attributable mortality	Germany	Men	2000		74.8565		Observed	e0	LC	DEUTNP
Lifestyle + non-lifestyle attributable mortality	Germany	Men	2001		75.2753		Observed	e0	LC	DEUTNP
Lifestyle + non-lifestyle attributable mortality	Germany	Men	2002		75.439		Observed	e0	LC	DEUTNP
Lifestyle + non-lifestyle attributable mortality	Germany	Men	2003		75.514		Observed	e0	LC	DEUTNP
Lifestyle + non-lifestyle attributable mortality	Germany	Men	2004		76.1484		Observed	e0	LC	DEUTNP
Lifestyle + non-lifestyle attributable mortality	Germany	Men	2005		76.3549		Observed	e0	LC	DEUTNP
Lifestyle + non-lifestyle attributable mortality	Germany	Men	2006		76.7511		Observed	e0	LC	DEUTNP
Lifestyle + non-lifestyle attributable mortality	Germany	Men	2007		76.9116		Observed	e0	LC	DEUTNP
Lifestyle + non-lifestyle attributable mortality	Germany	Men	2008		77.1052		Observed	e0	LC	DEUTNP
Lifestyle + non-lifestyle attributable mortality	Germany	Men	2009		77.2337		Observed	e0	LC	DEUTNP
Lifestyle + non-lifestyle attributable mortality	Germany	Men	2010		77.4334		Observed	e0	LC	DEUTNP
Lifestyle + non-lifestyle attributable mortality	Germany	Men	2011		77.7714		Observed	e0	LC	DEUTNP
Lifestyle + non-lifestyle attributable mortality	Germany	Men	2012		77.9655		Observed	e0	LC	DEUTNP
Lifestyle + non-lifestyle attributable mortality	Germany	Men	2013		77.9827		Observed	e0	LC	DEUTNP
Lifestyle + non-lifestyle attributable mortality	Germany	Men	2014		78.4329		Observed	e0	LC	DEUTNP
Lifestyle + non-lifestyle attributable mortality	Germany	Men	2015	78.6652	79.0864	79.4982	Projected	e0	LC	DEUTNP
Lifestyle + non-lifestyle attributable mortality	Germany	Men	2016	78.8504	79.3712	79.88	Projected	e0	LC	DEUTNP
Lifestyle + non-lifestyle attributable mortality	Germany	Men	2017	79.0193	79.6099	80.1935	Projected	e0	LC	DEUTNP
Lifestyle + non-lifestyle attributable mortality	Germany	Men	2018	79.1995	79.8511	80.4917	Projected	e0	LC	DEUTNP
Lifestyle + non-lifestyle attributable mortality	Germany	Men	2019	79.3793	80.0907	80.7791	Projected	e0	LC	DEUTNP
Lifestyle + non-lifestyle attributable mortality	Germany	Men	2020	79.5652	80.3268	81.0595	Projected	e0	LC	DEUTNP
Lifestyle + non-lifestyle attributable mortality	Germany	Men	2021	79.752	80.559	81.3382	Projected	e0	LC	DEUTNP
Lifestyle + non-lifestyle attributable mortality	Germany	Men	2022	79.9474	80.7943	81.613	Projected	e0	LC	DEUTNP
Lifestyle + non-lifestyle attributable mortality	Germany	Men	2023	80.1437	81.0236	81.8756	Projected	e0	LC	DEUTNP
Lifestyle + non-lifestyle attributable mortality	Germany	Men	2024	80.332	81.2492	82.1385	Projected	e0	LC	DEUTNP
Lifestyle + non-lifestyle attributable mortality	Germany	Men	2025	80.5205	81.4724	82.394	Projected	e0	LC	DEUTNP
Lifestyle + non-lifestyle attributable mortality	Germany	Men	2026	80.7133	81.6926	82.643	Projected	e0	LC	DEUTNP
Lifestyle + non-lifestyle attributable mortality	Germany	Men	2027	80.907	81.9121	82.8854	Projected	e0	LC	DEUTNP
Lifestyle + non-lifestyle attributable mortality	Germany	Men	2028	81.0978	82.1279	83.1227	Projected	e0	LC	DEUTNP
Lifestyle + non-lifestyle attributable mortality	Germany	Men	2029	81.2895	82.3429	83.3658	Projected	e0	LC	DEUTNP
Lifestyle + non-lifestyle attributable mortality	Germany	Men	2030	81.4746	82.5532	83.5943	Projected	e0	LC	DEUTNP
Lifestyle + non-lifestyle attributable mortality	Germany	Men	2031	81.6662	82.7646	83.8228	Projected	e0	LC	DEUTNP
Lifestyle + non-lifestyle attributable mortality	Germany	Men	2032	81.8492	82.9688	84.0495	Projected	e0	LC	DEUTNP
Lifestyle + non-lifestyle attributable mortality	Germany	Men	2033	82.0316	83.1737	84.2662	Projected	e0	LC	DEUTNP
Lifestyle + non-lifestyle attributable mortality	Germany	Men	2034	82.2193	83.3765	84.4832	Projected	e0	LC	DEUTNP
Lifestyle + non-lifestyle attributable mortality	Germany	Men	2035	82.3983	83.5773	84.6905	Projected	e0	LC	DEUTNP
Lifestyle + non-lifestyle attributable mortality	Germany	Men	2036	82.5838	83.7734	84.8963	Projected	e0	LC	DEUTNP
Lifestyle + non-lifestyle attributable mortality	Germany	Men	2037	82.767	83.9665	85.1045	Projected	e0	LC	DEUTNP
Lifestyle + non-lifestyle attributable mortality	Germany	Men	2038	82.9428	84.1586	85.3098	Projected	e0	LC	DEUTNP
Lifestyle + non-lifestyle attributable mortality	Germany	Men	2039	83.1193	84.3488	85.5073	Projected	e0	LC	DEUTNP
Lifestyle + non-lifestyle attributable mortality	Germany	Men	2040	83.2884	84.5361	85.7021	Projected	e0	LC	DEUTNP
Lifestyle + non-lifestyle attributable mortality	Germany	Men	2041	83.4634	84.7209	85.8945	Projected	e0	LC	DEUTNP
Lifestyle + non-lifestyle attributable mortality	Germany	Men	2042	83.6295	84.9053	86.08	Projected	e0	LC	DEUTNP
Lifestyle + non-lifestyle attributable mortality	Germany	Men	2043	83.8064	85.0894	86.2725	Projected	e0	LC	DEUTNP
Lifestyle + non-lifestyle attributable mortality	Germany	Men	2044	83.9759	85.2714	86.4619	Projected	e0	LC	DEUTNP
Lifestyle + non-lifestyle attributable mortality	Germany	Men	2045	84.1428	85.4472	86.6519	Projected	e0	LC	DEUTNP
Lifestyle + non-lifestyle attributable mortality	Germany	Men	2046	84.3121	85.6224	86.8377	Projected	e0	LC	DEUTNP
Lifestyle + non-lifestyle attributable mortality	Germany	Men	2047	84.4843	85.7988	87.0109	Projected	e0	LC	DEUTNP
Lifestyle + non-lifestyle attributable mortality	Germany	Men	2048	84.6584	85.9722	87.1942	Projected	e0	LC	DEUTNP
Lifestyle + non-lifestyle attributable mortality	Germany	Men	2049	84.8215	86.1439	87.3695	Projected	e0	LC	DEUTNP
Lifestyle + non-lifestyle attributable mortality	Germany	Men	2050	84.9892	86.3143	87.545	Projected	e0	LC	DEUTNP
Lifestyle + non-lifestyle attributable mortality	Germany	Men	2051	85.1525	86.4851	87.7116	Projected	e0	LC	DEUTNP
Lifestyle + non-lifestyle attributable mortality	Germany	Men	2052	85.3088	86.6501	87.8856	Projected	e0	LC	DEUTNP
Lifestyle + non-lifestyle attributable mortality	Germany	Men	2053	85.4679	86.8158	88.0497	Projected	e0	LC	DEUTNP
Lifestyle + non-lifestyle attributable mortality	Germany	Men	2054	85.6311	86.9773	88.2096	Projected	e0	LC	DEUTNP
Lifestyle + non-lifestyle attributable mortality	Germany	Men	2055	85.7961	87.1421	88.3711	Projected	e0	LC	DEUTNP
Lifestyle + non-lifestyle attributable mortality	Germany	Men	2056	85.9549	87.3033	88.5386	Projected	e0	LC	DEUTNP
Lifestyle + non-lifestyle attributable mortality	Germany	Men	2057	86.1188	87.4598	88.6927	Projected	e0	LC	DEUTNP
Lifestyle + non-lifestyle attributable mortality	Germany	Men	2058	86.2739	87.6168	88.8442	Projected	e0	LC	DEUTNP
Lifestyle + non-lifestyle attributable mortality	Germany	Men	2059	86.4201	87.7716	89.0008	Projected	e0	LC	DEUTNP
Lifestyle + non-lifestyle attributable mortality	Germany	Men	2060	86.5754	87.9265	89.1497	Projected	e0	LC	DEUTNP
Lifestyle + non-lifestyle attributable mortality	Germany	Men	2061	86.7248	88.0758	89.2968	Projected	e0	LC	DEUTNP
Lifestyle + non-lifestyle attributable mortality	Germany	Men	2062	86.8802	88.2264	89.4458	Projected	e0	LC	DEUTNP
Lifestyle + non-lifestyle attributable mortality	Germany	Men	2063	87.0239	88.3755	89.5908	Projected	e0	LC	DEUTNP
Lifestyle + non-lifestyle attributable mortality	Germany	Men	2064	87.1705	88.5214	89.7322	Projected	e0	LC	DEUTNP
Lifestyle + non-lifestyle attributable mortality	Germany	Men	2065	87.3223	88.6687	89.8714	Projected	e0	LC	DEUTNP
All-cause mortality	Greece	Men	1990		74.6593		Observed	e0	LC	GRC
All-cause mortality	Greece	Men	1991		74.6591		Observed	e0	LC	GRC
All-cause mortality	Greece	Men	1992		74.6178		Observed	e0	LC	GRC
All-cause mortality	Greece	Men	1993		74.8718		Observed	e0	LC	GRC
All-cause mortality	Greece	Men	1994		75.0501		Observed	e0	LC	GRC
All-cause mortality	Greece	Men	1995		74.9266		Observed	e0	LC	GRC
All-cause mortality	Greece	Men	1996		75.0424		Observed	e0	LC	GRC
All-cause mortality	Greece	Men	1997		75.4238		Observed	e0	LC	GRC
All-cause mortality	Greece	Men	1998		75.5054		Observed	e0	LC	GRC
All-cause mortality	Greece	Men	1999		75.5575		Observed	e0	LC	GRC
All-cause mortality	Greece	Men	2000		75.6578		Observed	e0	LC	GRC
All-cause mortality	Greece	Men	2001		76.1288		Observed	e0	LC	GRC
All-cause mortality	Greece	Men	2002		76.4045		Observed	e0	LC	GRC
All-cause mortality	Greece	Men	2003		76.5879		Observed	e0	LC	GRC
All-cause mortality	Greece	Men	2004		76.689		Observed	e0	LC	GRC
All-cause mortality	Greece	Men	2005		76.8499		Observed	e0	LC	GRC
All-cause mortality	Greece	Men	2006		77.1555		Observed	e0	LC	GRC
All-cause mortality	Greece	Men	2007		76.939		Observed	e0	LC	GRC
All-cause mortality	Greece	Men	2008		77.4746		Observed	e0	LC	GRC
All-cause mortality	Greece	Men	2009		77.4864		Observed	e0	LC	GRC
All-cause mortality	Greece	Men	2010		77.8727		Observed	e0	LC	GRC
All-cause mortality	Greece	Men	2011		77.8784		Observed	e0	LC	GRC
All-cause mortality	Greece	Men	2012		77.8215		Observed	e0	LC	GRC
All-cause mortality	Greece	Men	2013		78.4472		Observed	e0	LC	GRC
All-cause mortality	Greece	Men	2014	78.2323	78.6082	78.9748	Projected	e0	LC	GRC
All-cause mortality	Greece	Men	2014		78.4575		Observed	e0	LC	GRC
All-cause mortality	Greece	Men	2015	78.2263	78.7538	79.2626	Projected	e0	LC	GRC
All-cause mortality	Greece	Men	2016	78.2553	78.8981	79.5224	Projected	e0	LC	GRC
All-cause mortality	Greece	Men	2017	78.3049	79.0459	79.7605	Projected	e0	LC	GRC
All-cause mortality	Greece	Men	2018	78.3607	79.1856	79.9879	Projected	e0	LC	GRC
All-cause mortality	Greece	Men	2019	78.4258	79.3251	80.1957	Projected	e0	LC	GRC
All-cause mortality	Greece	Men	2020	78.4989	79.468	80.4006	Projected	e0	LC	GRC
All-cause mortality	Greece	Men	2021	78.5783	79.6103	80.5898	Projected	e0	LC	GRC
All-cause mortality	Greece	Men	2022	78.6631	79.75	80.7848	Projected	e0	LC	GRC
All-cause mortality	Greece	Men	2023	78.7483	79.8942	80.9748	Projected	e0	LC	GRC
All-cause mortality	Greece	Men	2024	78.8461	80.0277	81.1551	Projected	e0	LC	GRC
All-cause mortality	Greece	Men	2025	78.9355	80.1636	81.3318	Projected	e0	LC	GRC
All-cause mortality	Greece	Men	2026	79.0255	80.3005	81.5125	Projected	e0	LC	GRC
All-cause mortality	Greece	Men	2027	79.1172	80.4349	81.6854	Projected	e0	LC	GRC
All-cause mortality	Greece	Men	2028	79.2202	80.5716	81.8477	Projected	e0	LC	GRC
All-cause mortality	Greece	Men	2029	79.31	80.706	82.0213	Projected	e0	LC	GRC
All-cause mortality	Greece	Men	2030	79.4177	80.8377	82.1897	Projected	e0	LC	GRC
All-cause mortality	Greece	Men	2031	79.5126	80.9744	82.3569	Projected	e0	LC	GRC
All-cause mortality	Greece	Men	2032	79.6168	81.1039	82.5189	Projected	e0	LC	GRC
All-cause mortality	Greece	Men	2033	79.7146	81.234	82.6724	Projected	e0	LC	GRC
All-cause mortality	Greece	Men	2034	79.8045	81.3657	82.8276	Projected	e0	LC	GRC
All-cause mortality	Greece	Men	2035	79.9092	81.4968	82.9878	Projected	e0	LC	GRC
All-cause mortality	Greece	Men	2036	80.0141	81.6243	83.1475	Projected	e0	LC	GRC
All-cause mortality	Greece	Men	2037	80.1148	81.7524	83.3054	Projected	e0	LC	GRC
All-cause mortality	Greece	Men	2038	80.2127	81.8774	83.4515	Projected	e0	LC	GRC
All-cause mortality	Greece	Men	2039	80.3076	82.0063	83.5814	Projected	e0	LC	GRC
All-cause mortality	Greece	Men	2040	80.4102	82.1335	83.7265	Projected	e0	LC	GRC
All-cause mortality	Greece	Men	2041	80.5068	82.2571	83.8704	Projected	e0	LC	GRC
All-cause mortality	Greece	Men	2042	80.6035	82.3818	84.0082	Projected	e0	LC	GRC
All-cause mortality	Greece	Men	2043	80.7106	82.5094	84.1532	Projected	e0	LC	GRC
All-cause mortality	Greece	Men	2044	80.8103	82.6316	84.2934	Projected	e0	LC	GRC
All-cause mortality	Greece	Men	2045	80.9219	82.7534	84.4406	Projected	e0	LC	GRC
All-cause mortality	Greece	Men	2046	81.0171	82.8751	84.5833	Projected	e0	LC	GRC
All-cause mortality	Greece	Men	2047	81.1219	82.9976	84.7217	Projected	e0	LC	GRC
All-cause mortality	Greece	Men	2048	81.2247	83.117	84.8578	Projected	e0	LC	GRC
All-cause mortality	Greece	Men	2049	81.3314	83.2379	84.9908	Projected	e0	LC	GRC
All-cause mortality	Greece	Men	2050	81.4324	83.3577	85.1236	Projected	e0	LC	GRC
All-cause mortality	Greece	Men	2051	81.5464	83.4768	85.258	Projected	e0	LC	GRC
All-cause mortality	Greece	Men	2052	81.642	83.6001	85.3757	Projected	e0	LC	GRC
All-cause mortality	Greece	Men	2053	81.7411	83.7151	85.5055	Projected	e0	LC	GRC
All-cause mortality	Greece	Men	2054	81.8523	83.8302	85.6287	Projected	e0	LC	GRC
All-cause mortality	Greece	Men	2055	81.9446	83.9448	85.7574	Projected	e0	LC	GRC
All-cause mortality	Greece	Men	2056	82.0433	84.0582	85.8834	Projected	e0	LC	GRC
All-cause mortality	Greece	Men	2057	82.1505	84.1733	86.0019	Projected	e0	LC	GRC
All-cause mortality	Greece	Men	2058	82.2422	84.2912	86.1274	Projected	e0	LC	GRC
All-cause mortality	Greece	Men	2059	82.3477	84.4069	86.2575	Projected	e0	LC	GRC
All-cause mortality	Greece	Men	2060	82.4473	84.5175	86.3717	Projected	e0	LC	GRC
All-cause mortality	Greece	Men	2061	82.5534	84.6284	86.4974	Projected	e0	LC	GRC
All-cause mortality	Greece	Men	2062	82.6486	84.7399	86.6125	Projected	e0	LC	GRC
All-cause mortality	Greece	Men	2063	82.7449	84.8481	86.7327	Projected	e0	LC	GRC
All-cause mortality	Greece	Men	2064	82.833	84.9566	86.849	Projected	e0	LC	GRC
All-cause mortality	Greece	Men	2065	82.9456	85.0685	86.9712	Projected	e0	LC	GRC
Non-lifestyle attributable mortality	Greece	Men	1990		79.4811		Observed	e0	LC	GRC
Non-lifestyle attributable mortality	Greece	Men	1991		79.5738		Observed	e0	LC	GRC
Non-lifestyle attributable mortality	Greece	Men	1992		79.4523		Observed	e0	LC	GRC
Non-lifestyle attributable mortality	Greece	Men	1993		79.7887		Observed	e0	LC	GRC
Non-lifestyle attributable mortality	Greece	Men	1994		79.9275		Observed	e0	LC	GRC
Non-lifestyle attributable mortality	Greece	Men	1995		79.7517		Observed	e0	LC	GRC
Non-lifestyle attributable mortality	Greece	Men	1996		79.9114		Observed	e0	LC	GRC
Non-lifestyle attributable mortality	Greece	Men	1997		80.2088		Observed	e0	LC	GRC
Non-lifestyle attributable mortality	Greece	Men	1998		80.2593		Observed	e0	LC	GRC
Non-lifestyle attributable mortality	Greece	Men	1999		80.2936		Observed	e0	LC	GRC
Non-lifestyle attributable mortality	Greece	Men	2000		80.3807		Observed	e0	LC	GRC
Non-lifestyle attributable mortality	Greece	Men	2001		80.8296		Observed	e0	LC	GRC
Non-lifestyle attributable mortality	Greece	Men	2002		80.928		Observed	e0	LC	GRC
Non-lifestyle attributable mortality	Greece	Men	2003		81.1927		Observed	e0	LC	GRC
Non-lifestyle attributable mortality	Greece	Men	2004		81.3691		Observed	e0	LC	GRC
Non-lifestyle attributable mortality	Greece	Men	2005		81.495		Observed	e0	LC	GRC
Non-lifestyle attributable mortality	Greece	Men	2006		81.7679		Observed	e0	LC	GRC
Non-lifestyle attributable mortality	Greece	Men	2007		81.6212		Observed	e0	LC	GRC
Non-lifestyle attributable mortality	Greece	Men	2008		82.1543		Observed	e0	LC	GRC
Non-lifestyle attributable mortality	Greece	Men	2009		82.1578		Observed	e0	LC	GRC
Non-lifestyle attributable mortality	Greece	Men	2010		82.433		Observed	e0	LC	GRC
Non-lifestyle attributable mortality	Greece	Men	2011		82.52		Observed	e0	LC	GRC
Non-lifestyle attributable mortality	Greece	Men	2012		82.5089		Observed	e0	LC	GRC
Non-lifestyle attributable mortality	Greece	Men	2013		83.2071		Observed	e0	LC	GRC
Non-lifestyle attributable mortality	Greece	Men	2014	82.6022	83.0032	83.3912	Projected	e0	LC	GRC
Non-lifestyle attributable mortality	Greece	Men	2014		82.9171		Observed	e0	LC	GRC
Non-lifestyle attributable mortality	Greece	Men	2015	82.5659	83.1309	83.6736	Projected	e0	LC	GRC
Non-lifestyle attributable mortality	Greece	Men	2016	82.5667	83.2536	83.9034	Projected	e0	LC	GRC
Non-lifestyle attributable mortality	Greece	Men	2017	82.5928	83.3766	84.1182	Projected	e0	LC	GRC
Non-lifestyle attributable mortality	Greece	Men	2018	82.6243	83.4998	84.3223	Projected	e0	LC	GRC
Non-lifestyle attributable mortality	Greece	Men	2019	82.6729	83.6209	84.5084	Projected	e0	LC	GRC
Non-lifestyle attributable mortality	Greece	Men	2020	82.7156	83.745	84.694	Projected	e0	LC	GRC
Non-lifestyle attributable mortality	Greece	Men	2021	82.7776	83.8607	84.8736	Projected	e0	LC	GRC
Non-lifestyle attributable mortality	Greece	Men	2022	82.8406	83.9778	85.0406	Projected	e0	LC	GRC
Non-lifestyle attributable mortality	Greece	Men	2023	82.8976	84.0971	85.2009	Projected	e0	LC	GRC
Non-lifestyle attributable mortality	Greece	Men	2024	82.9546	84.2157	85.3682	Projected	e0	LC	GRC
Non-lifestyle attributable mortality	Greece	Men	2025	83.0395	84.332	85.5061	Projected	e0	LC	GRC
Non-lifestyle attributable mortality	Greece	Men	2026	83.1144	84.4401	85.6656	Projected	e0	LC	GRC
Non-lifestyle attributable mortality	Greece	Men	2027	83.1842	84.5569	85.8158	Projected	e0	LC	GRC
Non-lifestyle attributable mortality	Greece	Men	2028	83.2594	84.6729	85.9652	Projected	e0	LC	GRC
Non-lifestyle attributable mortality	Greece	Men	2029	83.3371	84.7825	86.1067	Projected	e0	LC	GRC
Non-lifestyle attributable mortality	Greece	Men	2030	83.4066	84.8968	86.2608	Projected	e0	LC	GRC
Non-lifestyle attributable mortality	Greece	Men	2031	83.4876	85.0063	86.3895	Projected	e0	LC	GRC
Non-lifestyle attributable mortality	Greece	Men	2032	83.5652	85.1151	86.5259	Projected	e0	LC	GRC
Non-lifestyle attributable mortality	Greece	Men	2033	83.6387	85.2219	86.6588	Projected	e0	LC	GRC
Non-lifestyle attributable mortality	Greece	Men	2034	83.7088	85.3361	86.7811	Projected	e0	LC	GRC
Non-lifestyle attributable mortality	Greece	Men	2035	83.7912	85.4395	86.9096	Projected	e0	LC	GRC
Non-lifestyle attributable mortality	Greece	Men	2036	83.8701	85.5487	87.0441	Projected	e0	LC	GRC
Non-lifestyle attributable mortality	Greece	Men	2037	83.9436	85.6523	87.1743	Projected	e0	LC	GRC
Non-lifestyle attributable mortality	Greece	Men	2038	84.0527	85.754	87.3045	Projected	e0	LC	GRC
Non-lifestyle attributable mortality	Greece	Men	2039	84.1323	85.8562	87.4223	Projected	e0	LC	GRC
Non-lifestyle attributable mortality	Greece	Men	2040	84.208	85.9619	87.5362	Projected	e0	LC	GRC
Non-lifestyle attributable mortality	Greece	Men	2041	84.2835	86.0656	87.6574	Projected	e0	LC	GRC
Non-lifestyle attributable mortality	Greece	Men	2042	84.3746	86.1646	87.7746	Projected	e0	LC	GRC
Non-lifestyle attributable mortality	Greece	Men	2043	84.4573	86.2652	87.8856	Projected	e0	LC	GRC
Non-lifestyle attributable mortality	Greece	Men	2044	84.5342	86.3671	87.9989	Projected	e0	LC	GRC
Non-lifestyle attributable mortality	Greece	Men	2045	84.6186	86.4702	88.1214	Projected	e0	LC	GRC
Non-lifestyle attributable mortality	Greece	Men	2046	84.7083	86.5671	88.2316	Projected	e0	LC	GRC
Non-lifestyle attributable mortality	Greece	Men	2047	84.7835	86.6655	88.3413	Projected	e0	LC	GRC
Non-lifestyle attributable mortality	Greece	Men	2048	84.8766	86.7616	88.4518	Projected	e0	LC	GRC
Non-lifestyle attributable mortality	Greece	Men	2049	84.9557	86.862	88.5574	Projected	e0	LC	GRC
Non-lifestyle attributable mortality	Greece	Men	2050	85.0355	86.9556	88.668	Projected	e0	LC	GRC
Non-lifestyle attributable mortality	Greece	Men	2051	85.1201	87.0528	88.7719	Projected	e0	LC	GRC
Non-lifestyle attributable mortality	Greece	Men	2052	85.199	87.1438	88.8755	Projected	e0	LC	GRC
Non-lifestyle attributable mortality	Greece	Men	2053	85.2805	87.2379	88.9794	Projected	e0	LC	GRC
Non-lifestyle attributable mortality	Greece	Men	2054	85.3567	87.3381	89.0883	Projected	e0	LC	GRC
Non-lifestyle attributable mortality	Greece	Men	2055	85.4318	87.4273	89.1859	Projected	e0	LC	GRC
Non-lifestyle attributable mortality	Greece	Men	2056	85.5106	87.5166	89.28	Projected	e0	LC	GRC
Non-lifestyle attributable mortality	Greece	Men	2057	85.5853	87.6092	89.3876	Projected	e0	LC	GRC
Non-lifestyle attributable mortality	Greece	Men	2058	85.6731	87.7012	89.4765	Projected	e0	LC	GRC
Non-lifestyle attributable mortality	Greece	Men	2059	85.7592	87.792	89.5675	Projected	e0	LC	GRC
Non-lifestyle attributable mortality	Greece	Men	2060	85.8361	87.8824	89.6594	Projected	e0	LC	GRC
Non-lifestyle attributable mortality	Greece	Men	2061	85.9144	87.9736	89.7571	Projected	e0	LC	GRC
Non-lifestyle attributable mortality	Greece	Men	2062	85.9892	88.0606	89.8516	Projected	e0	LC	GRC
Non-lifestyle attributable mortality	Greece	Men	2063	86.0748	88.1495	89.9438	Projected	e0	LC	GRC
Non-lifestyle attributable mortality	Greece	Men	2064	86.1515	88.2365	90.0387	Projected	e0	LC	GRC
Non-lifestyle attributable mortality	Greece	Men	2065	86.2414	88.3233	90.1251	Projected	e0	LC	GRC
Lifestyle + non-lifestyle attributable mortality	Greece	Men	1990		74.6593		Observed	e0	LC	GRC
Lifestyle + non-lifestyle attributable mortality	Greece	Men	1991		74.6591		Observed	e0	LC	GRC
Lifestyle + non-lifestyle attributable mortality	Greece	Men	1992		74.6178		Observed	e0	LC	GRC
Lifestyle + non-lifestyle attributable mortality	Greece	Men	1993		74.8718		Observed	e0	LC	GRC
Lifestyle + non-lifestyle attributable mortality	Greece	Men	1994		75.0501		Observed	e0	LC	GRC
Lifestyle + non-lifestyle attributable mortality	Greece	Men	1995		74.9266		Observed	e0	LC	GRC
Lifestyle + non-lifestyle attributable mortality	Greece	Men	1996		75.0424		Observed	e0	LC	GRC
Lifestyle + non-lifestyle attributable mortality	Greece	Men	1997		75.4238		Observed	e0	LC	GRC
Lifestyle + non-lifestyle attributable mortality	Greece	Men	1998		75.5054		Observed	e0	LC	GRC
Lifestyle + non-lifestyle attributable mortality	Greece	Men	1999		75.5575		Observed	e0	LC	GRC
Lifestyle + non-lifestyle attributable mortality	Greece	Men	2000		75.6578		Observed	e0	LC	GRC
Lifestyle + non-lifestyle attributable mortality	Greece	Men	2001		76.1288		Observed	e0	LC	GRC
Lifestyle + non-lifestyle attributable mortality	Greece	Men	2002		76.4045		Observed	e0	LC	GRC
Lifestyle + non-lifestyle attributable mortality	Greece	Men	2003		76.5879		Observed	e0	LC	GRC
Lifestyle + non-lifestyle attributable mortality	Greece	Men	2004		76.689		Observed	e0	LC	GRC
Lifestyle + non-lifestyle attributable mortality	Greece	Men	2005		76.8499		Observed	e0	LC	GRC
Lifestyle + non-lifestyle attributable mortality	Greece	Men	2006		77.1555		Observed	e0	LC	GRC
Lifestyle + non-lifestyle attributable mortality	Greece	Men	2007		76.939		Observed	e0	LC	GRC
Lifestyle + non-lifestyle attributable mortality	Greece	Men	2008		77.4746		Observed	e0	LC	GRC
Lifestyle + non-lifestyle attributable mortality	Greece	Men	2009		77.4864		Observed	e0	LC	GRC
Lifestyle + non-lifestyle attributable mortality	Greece	Men	2010		77.8727		Observed	e0	LC	GRC
Lifestyle + non-lifestyle attributable mortality	Greece	Men	2011		77.8784		Observed	e0	LC	GRC
Lifestyle + non-lifestyle attributable mortality	Greece	Men	2012		77.8215		Observed	e0	LC	GRC
Lifestyle + non-lifestyle attributable mortality	Greece	Men	2013		78.4472		Observed	e0	LC	GRC
Lifestyle + non-lifestyle attributable mortality	Greece	Men	2014		78.4575		Observed	e0	LC	GRC
Lifestyle + non-lifestyle attributable mortality	Greece	Men	2015	78.1287	78.7646	79.3833	Projected	e0	LC	GRC
Lifestyle + non-lifestyle attributable mortality	Greece	Men	2016	78.1452	78.9144	79.6489	Projected	e0	LC	GRC
Lifestyle + non-lifestyle attributable mortality	Greece	Men	2017	78.2022	79.0908	79.9421	Projected	e0	LC	GRC
Lifestyle + non-lifestyle attributable mortality	Greece	Men	2018	78.2561	79.2352	80.1627	Projected	e0	LC	GRC
Lifestyle + non-lifestyle attributable mortality	Greece	Men	2019	78.341	79.3978	80.4063	Projected	e0	LC	GRC
Lifestyle + non-lifestyle attributable mortality	Greece	Men	2020	78.4295	79.5714	80.6494	Projected	e0	LC	GRC
Lifestyle + non-lifestyle attributable mortality	Greece	Men	2021	78.5232	79.7195	80.8694	Projected	e0	LC	GRC
Lifestyle + non-lifestyle attributable mortality	Greece	Men	2022	78.6158	79.8901	81.0976	Projected	e0	LC	GRC
Lifestyle + non-lifestyle attributable mortality	Greece	Men	2023	78.7191	80.0615	81.3153	Projected	e0	LC	GRC
Lifestyle + non-lifestyle attributable mortality	Greece	Men	2024	78.8248	80.227	81.5362	Projected	e0	LC	GRC
Lifestyle + non-lifestyle attributable mortality	Greece	Men	2025	78.9551	80.3992	81.7368	Projected	e0	LC	GRC
Lifestyle + non-lifestyle attributable mortality	Greece	Men	2026	79.0688	80.5615	81.9555	Projected	e0	LC	GRC
Lifestyle + non-lifestyle attributable mortality	Greece	Men	2027	79.1911	80.7308	82.1639	Projected	e0	LC	GRC
Lifestyle + non-lifestyle attributable mortality	Greece	Men	2028	79.3153	80.9011	82.3689	Projected	e0	LC	GRC
Lifestyle + non-lifestyle attributable mortality	Greece	Men	2029	79.451	81.0758	82.5756	Projected	e0	LC	GRC
Lifestyle + non-lifestyle attributable mortality	Greece	Men	2030	79.5829	81.2468	82.782	Projected	e0	LC	GRC
Lifestyle + non-lifestyle attributable mortality	Greece	Men	2031	79.7134	81.4137	82.9784	Projected	e0	LC	GRC
Lifestyle + non-lifestyle attributable mortality	Greece	Men	2032	79.8501	81.5806	83.1688	Projected	e0	LC	GRC
Lifestyle + non-lifestyle attributable mortality	Greece	Men	2033	79.9804	81.7462	83.3725	Projected	e0	LC	GRC
Lifestyle + non-lifestyle attributable mortality	Greece	Men	2034	80.1054	81.9235	83.5604	Projected	e0	LC	GRC
Lifestyle + non-lifestyle attributable mortality	Greece	Men	2035	80.2587	82.0849	83.7395	Projected	e0	LC	GRC
Lifestyle + non-lifestyle attributable mortality	Greece	Men	2036	80.3948	82.2507	83.9409	Projected	e0	LC	GRC
Lifestyle + non-lifestyle attributable mortality	Greece	Men	2037	80.522	82.415	84.1314	Projected	e0	LC	GRC
Lifestyle + non-lifestyle attributable mortality	Greece	Men	2038	80.6752	82.5737	84.318	Projected	e0	LC	GRC
Lifestyle + non-lifestyle attributable mortality	Greece	Men	2039	80.8263	82.7387	84.4864	Projected	e0	LC	GRC
Lifestyle + non-lifestyle attributable mortality	Greece	Men	2040	80.9556	82.8957	84.6581	Projected	e0	LC	GRC
Lifestyle + non-lifestyle attributable mortality	Greece	Men	2041	81.0963	83.0525	84.8269	Projected	e0	LC	GRC
Lifestyle + non-lifestyle attributable mortality	Greece	Men	2042	81.2358	83.206	85.0074	Projected	e0	LC	GRC
Lifestyle + non-lifestyle attributable mortality	Greece	Men	2043	81.371	83.3599	85.1746	Projected	e0	LC	GRC
Lifestyle + non-lifestyle attributable mortality	Greece	Men	2044	81.4987	83.5106	85.3324	Projected	e0	LC	GRC
Lifestyle + non-lifestyle attributable mortality	Greece	Men	2045	81.6334	83.6659	85.4961	Projected	e0	LC	GRC
Lifestyle + non-lifestyle attributable mortality	Greece	Men	2046	81.7687	83.8064	85.6574	Projected	e0	LC	GRC
Lifestyle + non-lifestyle attributable mortality	Greece	Men	2047	81.8884	83.9541	85.8142	Projected	e0	LC	GRC
Lifestyle + non-lifestyle attributable mortality	Greece	Men	2048	82.0204	84.0955	85.979	Projected	e0	LC	GRC
Lifestyle + non-lifestyle attributable mortality	Greece	Men	2049	82.1568	84.2387	86.1193	Projected	e0	LC	GRC
Lifestyle + non-lifestyle attributable mortality	Greece	Men	2050	82.2788	84.377	86.2714	Projected	e0	LC	GRC
Lifestyle + non-lifestyle attributable mortality	Greece	Men	2051	82.4083	84.5208	86.4231	Projected	e0	LC	GRC
Lifestyle + non-lifestyle attributable mortality	Greece	Men	2052	82.5199	84.6547	86.5595	Projected	e0	LC	GRC
Lifestyle + non-lifestyle attributable mortality	Greece	Men	2053	82.6463	84.7847	86.7047	Projected	e0	LC	GRC
Lifestyle + non-lifestyle attributable mortality	Greece	Men	2054	82.7669	84.9261	86.8464	Projected	e0	LC	GRC
Lifestyle + non-lifestyle attributable mortality	Greece	Men	2055	82.8709	85.0527	86.9853	Projected	e0	LC	GRC
Lifestyle + non-lifestyle attributable mortality	Greece	Men	2056	82.9904	85.1821	87.121	Projected	e0	LC	GRC
Lifestyle + non-lifestyle attributable mortality	Greece	Men	2057	83.103	85.3146	87.263	Projected	e0	LC	GRC
Lifestyle + non-lifestyle attributable mortality	Greece	Men	2058	83.2279	85.4463	87.3864	Projected	e0	LC	GRC
Lifestyle + non-lifestyle attributable mortality	Greece	Men	2059	83.3479	85.5735	87.5175	Projected	e0	LC	GRC
Lifestyle + non-lifestyle attributable mortality	Greece	Men	2060	83.4747	85.7007	87.6386	Projected	e0	LC	GRC
Lifestyle + non-lifestyle attributable mortality	Greece	Men	2061	83.5831	85.8291	87.7713	Projected	e0	LC	GRC
Lifestyle + non-lifestyle attributable mortality	Greece	Men	2062	83.6973	85.9544	87.9001	Projected	e0	LC	GRC
Lifestyle + non-lifestyle attributable mortality	Greece	Men	2063	83.8202	86.0761	88.0233	Projected	e0	LC	GRC
Lifestyle + non-lifestyle attributable mortality	Greece	Men	2064	83.9296	86.1974	88.1576	Projected	e0	LC	GRC
Lifestyle + non-lifestyle attributable mortality	Greece	Men	2065	84.0509	86.3208	88.2758	Projected	e0	LC	GRC
All-cause mortality	Hungary	Men	1990		65.1422		Observed	e0	LC	HUN
All-cause mortality	Hungary	Men	1991		65.104		Observed	e0	LC	HUN
All-cause mortality	Hungary	Men	1992		64.6576		Observed	e0	LC	HUN
All-cause mortality	Hungary	Men	1993		64.6517		Observed	e0	LC	HUN
All-cause mortality	Hungary	Men	1994		65.0024		Observed	e0	LC	HUN
All-cause mortality	Hungary	Men	1995		65.4146		Observed	e0	LC	HUN
All-cause mortality	Hungary	Men	1996		66.294		Observed	e0	LC	HUN
All-cause mortality	Hungary	Men	1997		66.6381		Observed	e0	LC	HUN
All-cause mortality	Hungary	Men	1998		66.4298		Observed	e0	LC	HUN
All-cause mortality	Hungary	Men	1999		66.6654		Observed	e0	LC	HUN
All-cause mortality	Hungary	Men	2000		67.4866		Observed	e0	LC	HUN
All-cause mortality	Hungary	Men	2001		68.1852		Observed	e0	LC	HUN
All-cause mortality	Hungary	Men	2002		68.2843		Observed	e0	LC	HUN
All-cause mortality	Hungary	Men	2003		68.3256		Observed	e0	LC	HUN
All-cause mortality	Hungary	Men	2004		68.6625		Observed	e0	LC	HUN
All-cause mortality	Hungary	Men	2005		68.6166		Observed	e0	LC	HUN
All-cause mortality	Hungary	Men	2006		69.0802		Observed	e0	LC	HUN
All-cause mortality	Hungary	Men	2007		69.263		Observed	e0	LC	HUN
All-cause mortality	Hungary	Men	2008		69.8335		Observed	e0	LC	HUN
All-cause mortality	Hungary	Men	2009		70.1207		Observed	e0	LC	HUN
All-cause mortality	Hungary	Men	2010		70.5712		Observed	e0	LC	HUN
All-cause mortality	Hungary	Men	2011		71.1483		Observed	e0	LC	HUN
All-cause mortality	Hungary	Men	2012		71.5503		Observed	e0	LC	HUN
All-cause mortality	Hungary	Men	2013		72.1236		Observed	e0	LC	HUN
All-cause mortality	Hungary	Men	2014	71.9814	72.4976	73.0032	Projected	e0	LC	HUN
All-cause mortality	Hungary	Men	2014		72.2596		Observed	e0	LC	HUN
All-cause mortality	Hungary	Men	2015	72.011	72.7294	73.4241	Projected	e0	LC	HUN
All-cause mortality	Hungary	Men	2016	72.08	72.9565	73.7938	Projected	e0	LC	HUN
All-cause mortality	Hungary	Men	2017	72.1727	73.1857	74.139	Projected	e0	LC	HUN
All-cause mortality	Hungary	Men	2018	72.2897	73.4084	74.4544	Projected	e0	LC	HUN
All-cause mortality	Hungary	Men	2019	72.4155	73.6293	74.7536	Projected	e0	LC	HUN
All-cause mortality	Hungary	Men	2020	72.5514	73.8468	75.0441	Projected	e0	LC	HUN
All-cause mortality	Hungary	Men	2021	72.6767	74.0585	75.3198	Projected	e0	LC	HUN
All-cause mortality	Hungary	Men	2022	72.8232	74.2697	75.5898	Projected	e0	LC	HUN
All-cause mortality	Hungary	Men	2023	72.9693	74.4778	75.855	Projected	e0	LC	HUN
All-cause mortality	Hungary	Men	2024	73.1203	74.6874	76.1052	Projected	e0	LC	HUN
All-cause mortality	Hungary	Men	2025	73.2778	74.8907	76.3648	Projected	e0	LC	HUN
All-cause mortality	Hungary	Men	2026	73.4376	75.0888	76.6048	Projected	e0	LC	HUN
All-cause mortality	Hungary	Men	2027	73.5802	75.2914	76.8506	Projected	e0	LC	HUN
All-cause mortality	Hungary	Men	2028	73.7502	75.4892	77.0843	Projected	e0	LC	HUN
All-cause mortality	Hungary	Men	2029	73.8939	75.6814	77.3197	Projected	e0	LC	HUN
All-cause mortality	Hungary	Men	2030	74.0438	75.8731	77.5427	Projected	e0	LC	HUN
All-cause mortality	Hungary	Men	2031	74.1984	76.0677	77.7526	Projected	e0	LC	HUN
All-cause mortality	Hungary	Men	2032	74.3626	76.256	77.9695	Projected	e0	LC	HUN
All-cause mortality	Hungary	Men	2033	74.5191	76.4458	78.1984	Projected	e0	LC	HUN
All-cause mortality	Hungary	Men	2034	74.6854	76.6316	78.4088	Projected	e0	LC	HUN
All-cause mortality	Hungary	Men	2035	74.8288	76.8164	78.6185	Projected	e0	LC	HUN
All-cause mortality	Hungary	Men	2036	74.9917	76.9992	78.824	Projected	e0	LC	HUN
All-cause mortality	Hungary	Men	2037	75.1497	77.1774	79.0342	Projected	e0	LC	HUN
All-cause mortality	Hungary	Men	2038	75.31	77.3587	79.2262	Projected	e0	LC	HUN
All-cause mortality	Hungary	Men	2039	75.4667	77.534	79.4287	Projected	e0	LC	HUN
All-cause mortality	Hungary	Men	2040	75.614	77.715	79.6222	Projected	e0	LC	HUN
All-cause mortality	Hungary	Men	2041	75.7616	77.8879	79.8247	Projected	e0	LC	HUN
All-cause mortality	Hungary	Men	2042	75.9325	78.0587	80.0201	Projected	e0	LC	HUN
All-cause mortality	Hungary	Men	2043	76.0819	78.2307	80.2144	Projected	e0	LC	HUN
All-cause mortality	Hungary	Men	2044	76.2269	78.4029	80.3984	Projected	e0	LC	HUN
All-cause mortality	Hungary	Men	2045	76.3782	78.5751	80.5799	Projected	e0	LC	HUN
All-cause mortality	Hungary	Men	2046	76.5416	78.7391	80.7667	Projected	e0	LC	HUN
All-cause mortality	Hungary	Men	2047	76.6873	78.9057	80.9565	Projected	e0	LC	HUN
All-cause mortality	Hungary	Men	2048	76.845	79.0718	81.1358	Projected	e0	LC	HUN
All-cause mortality	Hungary	Men	2049	76.9942	79.2364	81.3203	Projected	e0	LC	HUN
All-cause mortality	Hungary	Men	2050	77.1271	79.4001	81.4886	Projected	e0	LC	HUN
All-cause mortality	Hungary	Men	2051	77.2782	79.5644	81.666	Projected	e0	LC	HUN
All-cause mortality	Hungary	Men	2052	77.4208	79.7244	81.8332	Projected	e0	LC	HUN
All-cause mortality	Hungary	Men	2053	77.5848	79.8849	82.0082	Projected	e0	LC	HUN
All-cause mortality	Hungary	Men	2054	77.7329	80.0371	82.1675	Projected	e0	LC	HUN
All-cause mortality	Hungary	Men	2055	77.8817	80.198	82.3402	Projected	e0	LC	HUN
All-cause mortality	Hungary	Men	2056	78.0299	80.3592	82.4993	Projected	e0	LC	HUN
All-cause mortality	Hungary	Men	2057	78.1662	80.5156	82.67	Projected	e0	LC	HUN
All-cause mortality	Hungary	Men	2058	78.3135	80.6748	82.8461	Projected	e0	LC	HUN
All-cause mortality	Hungary	Men	2059	78.4662	80.8279	83.0125	Projected	e0	LC	HUN
All-cause mortality	Hungary	Men	2060	78.6076	80.9847	83.1701	Projected	e0	LC	HUN
All-cause mortality	Hungary	Men	2061	78.7358	81.1352	83.3374	Projected	e0	LC	HUN
All-cause mortality	Hungary	Men	2062	78.8756	81.2831	83.4871	Projected	e0	LC	HUN
All-cause mortality	Hungary	Men	2063	79.0189	81.4299	83.6374	Projected	e0	LC	HUN
All-cause mortality	Hungary	Men	2064	79.1665	81.5835	83.793	Projected	e0	LC	HUN
All-cause mortality	Hungary	Men	2065	79.3055	81.7354	83.9474	Projected	e0	LC	HUN
Non-lifestyle attributable mortality	Hungary	Men	1990		74.6883		Observed	e0	LC	HUN
Non-lifestyle attributable mortality	Hungary	Men	1991		74.7986		Observed	e0	LC	HUN
Non-lifestyle attributable mortality	Hungary	Men	1992		74.8146		Observed	e0	LC	HUN
Non-lifestyle attributable mortality	Hungary	Men	1993		74.9249		Observed	e0	LC	HUN
Non-lifestyle attributable mortality	Hungary	Men	1994		75.4328		Observed	e0	LC	HUN
Non-lifestyle attributable mortality	Hungary	Men	1995		75.6524		Observed	e0	LC	HUN
Non-lifestyle attributable mortality	Hungary	Men	1996		76.303		Observed	e0	LC	HUN
Non-lifestyle attributable mortality	Hungary	Men	1997		76.5814		Observed	e0	LC	HUN
Non-lifestyle attributable mortality	Hungary	Men	1998		76.4981		Observed	e0	LC	HUN
Non-lifestyle attributable mortality	Hungary	Men	1999		76.6548		Observed	e0	LC	HUN
Non-lifestyle attributable mortality	Hungary	Men	2000		77.207		Observed	e0	LC	HUN
Non-lifestyle attributable mortality	Hungary	Men	2001		77.7043		Observed	e0	LC	HUN
Non-lifestyle attributable mortality	Hungary	Men	2002		77.695		Observed	e0	LC	HUN
Non-lifestyle attributable mortality	Hungary	Men	2003		77.7596		Observed	e0	LC	HUN
Non-lifestyle attributable mortality	Hungary	Men	2004		78.1033		Observed	e0	LC	HUN
Non-lifestyle attributable mortality	Hungary	Men	2005		77.8356		Observed	e0	LC	HUN
Non-lifestyle attributable mortality	Hungary	Men	2006		78.2888		Observed	e0	LC	HUN
Non-lifestyle attributable mortality	Hungary	Men	2007		78.3831		Observed	e0	LC	HUN
Non-lifestyle attributable mortality	Hungary	Men	2008		78.7615		Observed	e0	LC	HUN
Non-lifestyle attributable mortality	Hungary	Men	2009		79.0064		Observed	e0	LC	HUN
Non-lifestyle attributable mortality	Hungary	Men	2010		79.3662		Observed	e0	LC	HUN
Non-lifestyle attributable mortality	Hungary	Men	2011		79.63		Observed	e0	LC	HUN
Non-lifestyle attributable mortality	Hungary	Men	2012		79.9268		Observed	e0	LC	HUN
Non-lifestyle attributable mortality	Hungary	Men	2013		80.1028		Observed	e0	LC	HUN
Non-lifestyle attributable mortality	Hungary	Men	2014	80.1334	80.4968	80.8486	Projected	e0	LC	HUN
Non-lifestyle attributable mortality	Hungary	Men	2014		80.3017		Observed	e0	LC	HUN
Non-lifestyle attributable mortality	Hungary	Men	2015	80.1727	80.6784	81.1713	Projected	e0	LC	HUN
Non-lifestyle attributable mortality	Hungary	Men	2016	80.2479	80.8633	81.4465	Projected	e0	LC	HUN
Non-lifestyle attributable mortality	Hungary	Men	2017	80.3344	81.0419	81.7041	Projected	e0	LC	HUN
Non-lifestyle attributable mortality	Hungary	Men	2018	80.4428	81.2173	81.9509	Projected	e0	LC	HUN
Non-lifestyle attributable mortality	Hungary	Men	2019	80.5524	81.3897	82.1857	Projected	e0	LC	HUN
Non-lifestyle attributable mortality	Hungary	Men	2020	80.6738	81.5612	82.4057	Projected	e0	LC	HUN
Non-lifestyle attributable mortality	Hungary	Men	2021	80.7872	81.7289	82.6191	Projected	e0	LC	HUN
Non-lifestyle attributable mortality	Hungary	Men	2022	80.9074	81.8987	82.8288	Projected	e0	LC	HUN
Non-lifestyle attributable mortality	Hungary	Men	2023	81.0299	82.0634	83.0317	Projected	e0	LC	HUN
Non-lifestyle attributable mortality	Hungary	Men	2024	81.1506	82.2288	83.2352	Projected	e0	LC	HUN
Non-lifestyle attributable mortality	Hungary	Men	2025	81.2796	82.3917	83.4271	Projected	e0	LC	HUN
Non-lifestyle attributable mortality	Hungary	Men	2026	81.4132	82.5542	83.6151	Projected	e0	LC	HUN
Non-lifestyle attributable mortality	Hungary	Men	2027	81.5344	82.7112	83.8063	Projected	e0	LC	HUN
Non-lifestyle attributable mortality	Hungary	Men	2028	81.6621	82.8685	83.9861	Projected	e0	LC	HUN
Non-lifestyle attributable mortality	Hungary	Men	2029	81.7982	83.0233	84.1621	Projected	e0	LC	HUN
Non-lifestyle attributable mortality	Hungary	Men	2030	81.9264	83.1758	84.3392	Projected	e0	LC	HUN
Non-lifestyle attributable mortality	Hungary	Men	2031	82.0556	83.3319	84.5207	Projected	e0	LC	HUN
Non-lifestyle attributable mortality	Hungary	Men	2032	82.1838	83.4811	84.6895	Projected	e0	LC	HUN
Non-lifestyle attributable mortality	Hungary	Men	2033	82.3067	83.6303	84.8532	Projected	e0	LC	HUN
Non-lifestyle attributable mortality	Hungary	Men	2034	82.437	83.7765	85.0186	Projected	e0	LC	HUN
Non-lifestyle attributable mortality	Hungary	Men	2035	82.5538	83.921	85.1786	Projected	e0	LC	HUN
Non-lifestyle attributable mortality	Hungary	Men	2036	82.6808	84.0704	85.3398	Projected	e0	LC	HUN
Non-lifestyle attributable mortality	Hungary	Men	2037	82.8168	84.2097	85.5004	Projected	e0	LC	HUN
Non-lifestyle attributable mortality	Hungary	Men	2038	82.9485	84.3542	85.6508	Projected	e0	LC	HUN
Non-lifestyle attributable mortality	Hungary	Men	2039	83.0753	84.4947	85.8111	Projected	e0	LC	HUN
Non-lifestyle attributable mortality	Hungary	Men	2040	83.2015	84.6353	85.9622	Projected	e0	LC	HUN
Non-lifestyle attributable mortality	Hungary	Men	2041	83.3314	84.773	86.1164	Projected	e0	LC	HUN
Non-lifestyle attributable mortality	Hungary	Men	2042	83.457	84.9126	86.2711	Projected	e0	LC	HUN
Non-lifestyle attributable mortality	Hungary	Men	2043	83.5733	85.0479	86.4049	Projected	e0	LC	HUN
Non-lifestyle attributable mortality	Hungary	Men	2044	83.698	85.1849	86.5493	Projected	e0	LC	HUN
Non-lifestyle attributable mortality	Hungary	Men	2045	83.8179	85.3202	86.7	Projected	e0	LC	HUN
Non-lifestyle attributable mortality	Hungary	Men	2046	83.9378	85.4507	86.8402	Projected	e0	LC	HUN
Non-lifestyle attributable mortality	Hungary	Men	2047	84.0585	85.581	86.9803	Projected	e0	LC	HUN
Non-lifestyle attributable mortality	Hungary	Men	2048	84.1764	85.7133	87.1203	Projected	e0	LC	HUN
Non-lifestyle attributable mortality	Hungary	Men	2049	84.2935	85.842	87.2524	Projected	e0	LC	HUN
Non-lifestyle attributable mortality	Hungary	Men	2050	84.4127	85.9709	87.3885	Projected	e0	LC	HUN
Non-lifestyle attributable mortality	Hungary	Men	2051	84.5337	86.098	87.5215	Projected	e0	LC	HUN
Non-lifestyle attributable mortality	Hungary	Men	2052	84.6462	86.2271	87.6554	Projected	e0	LC	HUN
Non-lifestyle attributable mortality	Hungary	Men	2053	84.7597	86.3497	87.786	Projected	e0	LC	HUN
Non-lifestyle attributable mortality	Hungary	Men	2054	84.8785	86.4727	87.9148	Projected	e0	LC	HUN
Non-lifestyle attributable mortality	Hungary	Men	2055	84.9876	86.5969	88.0474	Projected	e0	LC	HUN
Non-lifestyle attributable mortality	Hungary	Men	2056	85.1086	86.7158	88.1743	Projected	e0	LC	HUN
Non-lifestyle attributable mortality	Hungary	Men	2057	85.2271	86.8356	88.2958	Projected	e0	LC	HUN
Non-lifestyle attributable mortality	Hungary	Men	2058	85.3419	86.96	88.4233	Projected	e0	LC	HUN
Non-lifestyle attributable mortality	Hungary	Men	2059	85.447	87.0791	88.5509	Projected	e0	LC	HUN
Non-lifestyle attributable mortality	Hungary	Men	2060	85.5687	87.1966	88.6692	Projected	e0	LC	HUN
Non-lifestyle attributable mortality	Hungary	Men	2061	85.6753	87.3179	88.7977	Projected	e0	LC	HUN
Non-lifestyle attributable mortality	Hungary	Men	2062	85.7888	87.4367	88.9262	Projected	e0	LC	HUN
Non-lifestyle attributable mortality	Hungary	Men	2063	85.8996	87.5507	89.0399	Projected	e0	LC	HUN
Non-lifestyle attributable mortality	Hungary	Men	2064	86.0091	87.669	89.1573	Projected	e0	LC	HUN
Non-lifestyle attributable mortality	Hungary	Men	2065	86.1242	87.7831	89.2813	Projected	e0	LC	HUN
Lifestyle + non-lifestyle attributable mortality	Hungary	Men	1990		65.1422		Observed	e0	LC	HUN
Lifestyle + non-lifestyle attributable mortality	Hungary	Men	1991		65.104		Observed	e0	LC	HUN
Lifestyle + non-lifestyle attributable mortality	Hungary	Men	1992		64.6576		Observed	e0	LC	HUN
Lifestyle + non-lifestyle attributable mortality	Hungary	Men	1993		64.6517		Observed	e0	LC	HUN
Lifestyle + non-lifestyle attributable mortality	Hungary	Men	1994		65.0024		Observed	e0	LC	HUN
[truncated: 6,281 more rows]
