# Supplementary material for: Future life expectancy in Europe taking into account the impact of smoking, obesity, and alcohol
Source: eLife. 2021 Jul 6;10:e66590. doi: 10.7554/eLife.66590 (PMC8337079; doi:10.7554/eLife.66590)
Supplement: Figure 3—source data 1. [file elife-66590-fig3-data1.xlsx]

## Sheet: data
lifestyle	country	sex	year	lower95	median	upper95	method	type	model	HMD_code
all-cause (indirect)	Austria	Men	1990		72.226		Observed	e0	LL	AUT
all-cause (indirect)	Austria	Men	1991		72.2614		Observed	e0	LL	AUT
all-cause (indirect)	Austria	Men	1992		72.5066		Observed	e0	LL	AUT
all-cause (indirect)	Austria	Men	1993		72.7598		Observed	e0	LL	AUT
all-cause (indirect)	Austria	Men	1994		73.1152		Observed	e0	LL	AUT
all-cause (indirect)	Austria	Men	1995		73.2937		Observed	e0	LL	AUT
all-cause (indirect)	Austria	Men	1996		73.6596		Observed	e0	LL	AUT
all-cause (indirect)	Austria	Men	1997		74.0153		Observed	e0	LL	AUT
all-cause (indirect)	Austria	Men	1998		74.4407		Observed	e0	LL	AUT
all-cause (indirect)	Austria	Men	1999		74.7757		Observed	e0	LL	AUT
all-cause (indirect)	Austria	Men	2000		75.0937		Observed	e0	LL	AUT
all-cause (indirect)	Austria	Men	2001		75.5877		Observed	e0	LL	AUT
all-cause (indirect)	Austria	Men	2002		75.7732		Observed	e0	LL	AUT
all-cause (indirect)	Austria	Men	2003		75.9121		Observed	e0	LL	AUT
all-cause (indirect)	Austria	Men	2004		76.3892		Observed	e0	LL	AUT
all-cause (indirect)	Austria	Men	2005		76.6179		Observed	e0	LL	AUT
all-cause (indirect)	Austria	Men	2006		77.0736		Observed	e0	LL	AUT
all-cause (indirect)	Austria	Men	2007		77.2896		Observed	e0	LL	AUT
all-cause (indirect)	Austria	Men	2008		77.5835		Observed	e0	LL	AUT
all-cause (indirect)	Austria	Men	2009		77.3954		Observed	e0	LL	AUT
all-cause (indirect)	Austria	Men	2010		77.6562		Observed	e0	LL	AUT
all-cause (indirect)	Austria	Men	2011		78.0773		Observed	e0	LL	AUT
all-cause (indirect)	Austria	Men	2012		78.2584		Observed	e0	LL	AUT
all-cause (indirect)	Austria	Men	2013		78.4558		Observed	e0	LL	AUT
all-cause (indirect)	Austria	Men	2014		78.9134		Observed	e0	LL	AUT
all-cause (indirect)	Austria	Men	2015	78.6009	79.4709	80.2901	Projected	e0	LL	AUT
all-cause (indirect)	Austria	Men	2016	78.7103	79.7598	80.7272	Projected	e0	LL	AUT
all-cause (indirect)	Austria	Men	2017	78.8893	80.0573	81.1299	Projected	e0	LL	AUT
all-cause (indirect)	Austria	Men	2018	79.0461	80.3432	81.5206	Projected	e0	LL	AUT
all-cause (indirect)	Austria	Men	2019	79.2469	80.6357	81.8944	Projected	e0	LL	AUT
all-cause (indirect)	Austria	Men	2020	79.4479	80.9134	82.2444	Projected	e0	LL	AUT
all-cause (indirect)	Austria	Men	2021	79.6391	81.1947	82.5868	Projected	e0	LL	AUT
all-cause (indirect)	Austria	Men	2022	79.8498	81.4733	82.9069	Projected	e0	LL	AUT
all-cause (indirect)	Austria	Men	2023	80.0607	81.7392	83.2218	Projected	e0	LL	AUT
all-cause (indirect)	Austria	Men	2024	80.2771	82.0037	83.5286	Projected	e0	LL	AUT
all-cause (indirect)	Austria	Men	2025	80.4855	82.266	83.8258	Projected	e0	LL	AUT
all-cause (indirect)	Austria	Men	2026	80.6799	82.5205	84.1346	Projected	e0	LL	AUT
all-cause (indirect)	Austria	Men	2027	80.8983	82.7698	84.4112	Projected	e0	LL	AUT
all-cause (indirect)	Austria	Men	2028	81.11	83.0274	84.6966	Projected	e0	LL	AUT
all-cause (indirect)	Austria	Men	2029	81.3112	83.2723	84.9608	Projected	e0	LL	AUT
all-cause (indirect)	Austria	Men	2030	81.5244	83.519	85.2214	Projected	e0	LL	AUT
all-cause (indirect)	Austria	Men	2031	81.7233	83.7612	85.4821	Projected	e0	LL	AUT
all-cause (indirect)	Austria	Men	2032	81.9203	83.9919	85.7514	Projected	e0	LL	AUT
all-cause (indirect)	Austria	Men	2033	82.1296	84.2266	85.9806	Projected	e0	LL	AUT
all-cause (indirect)	Austria	Men	2034	82.3468	84.4604	86.2406	Projected	e0	LL	AUT
all-cause (indirect)	Austria	Men	2035	82.5533	84.6844	86.4773	Projected	e0	LL	AUT
all-cause (indirect)	Austria	Men	2036	82.7628	84.9103	86.7049	Projected	e0	LL	AUT
all-cause (indirect)	Austria	Men	2037	82.9539	85.1278	86.9487	Projected	e0	LL	AUT
all-cause (indirect)	Austria	Men	2038	83.1679	85.3493	87.1789	Projected	e0	LL	AUT
all-cause (indirect)	Austria	Men	2039	83.3657	85.5714	87.4056	Projected	e0	LL	AUT
all-cause (indirect)	Austria	Men	2040	83.5657	85.7849	87.618	Projected	e0	LL	AUT
all-cause (indirect)	Austria	Men	2041	83.7844	85.9953	87.8307	Projected	e0	LL	AUT
all-cause (indirect)	Austria	Men	2042	83.9631	86.2038	88.0391	Projected	e0	LL	AUT
all-cause (indirect)	Austria	Men	2043	84.1474	86.4126	88.2464	Projected	e0	LL	AUT
all-cause (indirect)	Austria	Men	2044	84.3558	86.6167	88.4564	Projected	e0	LL	AUT
all-cause (indirect)	Austria	Men	2045	84.5597	86.8207	88.6628	Projected	e0	LL	AUT
all-cause (indirect)	Austria	Men	2046	84.7464	87.0189	88.8607	Projected	e0	LL	AUT
all-cause (indirect)	Austria	Men	2047	84.9379	87.2148	89.0703	Projected	e0	LL	AUT
all-cause (indirect)	Austria	Men	2048	85.1319	87.4069	89.253	Projected	e0	LL	AUT
all-cause (indirect)	Austria	Men	2049	85.314	87.6028	89.4401	Projected	e0	LL	AUT
all-cause (indirect)	Austria	Men	2050	85.4933	87.7875	89.6269	Projected	e0	LL	AUT
all-cause (indirect)	Austria	Men	2051	85.7004	87.9795	89.8124	Projected	e0	LL	AUT
all-cause (indirect)	Austria	Men	2052	85.8875	88.1644	89.9892	Projected	e0	LL	AUT
all-cause (indirect)	Austria	Men	2053	86.0614	88.3457	90.1755	Projected	e0	LL	AUT
all-cause (indirect)	Austria	Men	2054	86.25	88.5236	90.3478	Projected	e0	LL	AUT
all-cause (indirect)	Austria	Men	2055	86.436	88.7077	90.5165	Projected	e0	LL	AUT
all-cause (indirect)	Austria	Men	2056	86.6064	88.8868	90.695	Projected	e0	LL	AUT
all-cause (indirect)	Austria	Men	2057	86.7918	89.0564	90.8669	Projected	e0	LL	AUT
all-cause (indirect)	Austria	Men	2058	86.9835	89.2318	91.0334	Projected	e0	LL	AUT
all-cause (indirect)	Austria	Men	2059	87.1506	89.4048	91.2003	Projected	e0	LL	AUT
all-cause (indirect)	Austria	Men	2060	87.3301	89.5683	91.3634	Projected	e0	LL	AUT
all-cause (indirect)	Austria	Men	2061	87.4925	89.734	91.5303	Projected	e0	LL	AUT
all-cause (indirect)	Austria	Men	2062	87.6778	89.897	91.6756	Projected	e0	LL	AUT
all-cause (indirect)	Austria	Men	2063	87.8475	90.063	91.8301	Projected	e0	LL	AUT
all-cause (indirect)	Austria	Men	2064	88.0101	90.2253	91.9848	Projected	e0	LL	AUT
all-cause (indirect)	Austria	Men	2065	88.1771	90.3791	92.1371	Projected	e0	LL	AUT
all-cause (indirect)	Belgium	Men	1990		72.6959		Observed	e0	LL	BEL
all-cause (indirect)	Belgium	Men	1991		72.8459		Observed	e0	LL	BEL
all-cause (indirect)	Belgium	Men	1992		72.9736		Observed	e0	LL	BEL
all-cause (indirect)	Belgium	Men	1993		72.94		Observed	e0	LL	BEL
all-cause (indirect)	Belgium	Men	1994		73.3489		Observed	e0	LL	BEL
all-cause (indirect)	Belgium	Men	1995		73.4316		Observed	e0	LL	BEL
all-cause (indirect)	Belgium	Men	1996		73.8299		Observed	e0	LL	BEL
all-cause (indirect)	Belgium	Men	1997		74.1561		Observed	e0	LL	BEL
all-cause (indirect)	Belgium	Men	1998		74.2954		Observed	e0	LL	BEL
all-cause (indirect)	Belgium	Men	1999		74.3633		Observed	e0	LL	BEL
all-cause (indirect)	Belgium	Men	2000		74.5643		Observed	e0	LL	BEL
all-cause (indirect)	Belgium	Men	2001		74.9174		Observed	e0	LL	BEL
all-cause (indirect)	Belgium	Men	2002		75.0788		Observed	e0	LL	BEL
all-cause (indirect)	Belgium	Men	2003		75.3583		Observed	e0	LL	BEL
all-cause (indirect)	Belgium	Men	2004		75.969		Observed	e0	LL	BEL
all-cause (indirect)	Belgium	Men	2005		76.1442		Observed	e0	LL	BEL
all-cause (indirect)	Belgium	Men	2006		76.5178		Observed	e0	LL	BEL
all-cause (indirect)	Belgium	Men	2007		76.7381		Observed	e0	LL	BEL
all-cause (indirect)	Belgium	Men	2008		76.769		Observed	e0	LL	BEL
all-cause (indirect)	Belgium	Men	2009		77.1593		Observed	e0	LL	BEL
all-cause (indirect)	Belgium	Men	2010		77.3748		Observed	e0	LL	BEL
all-cause (indirect)	Belgium	Men	2011		77.7662		Observed	e0	LL	BEL
all-cause (indirect)	Belgium	Men	2012		77.6319		Observed	e0	LL	BEL
all-cause (indirect)	Belgium	Men	2013		77.9477		Observed	e0	LL	BEL
all-cause (indirect)	Belgium	Men	2014		78.5727		Observed	e0	LL	BEL
all-cause (indirect)	Belgium	Men	2015	78.5421	79.5075	80.4346	Projected	e0	LL	BEL
all-cause (indirect)	Belgium	Men	2016	78.7377	79.9469	81.1002	Projected	e0	LL	BEL
all-cause (indirect)	Belgium	Men	2017	78.9218	80.278	81.5556	Projected	e0	LL	BEL
all-cause (indirect)	Belgium	Men	2018	79.1391	80.6359	82.0267	Projected	e0	LL	BEL
all-cause (indirect)	Belgium	Men	2019	79.3591	80.9772	82.4767	Projected	e0	LL	BEL
all-cause (indirect)	Belgium	Men	2020	79.5984	81.3197	82.8904	Projected	e0	LL	BEL
all-cause (indirect)	Belgium	Men	2021	79.8402	81.6504	83.308	Projected	e0	LL	BEL
all-cause (indirect)	Belgium	Men	2022	80.0908	81.9809	83.6861	Projected	e0	LL	BEL
all-cause (indirect)	Belgium	Men	2023	80.343	82.2995	84.0712	Projected	e0	LL	BEL
all-cause (indirect)	Belgium	Men	2024	80.588	82.61	84.4283	Projected	e0	LL	BEL
all-cause (indirect)	Belgium	Men	2025	80.8246	82.9195	84.7693	Projected	e0	LL	BEL
all-cause (indirect)	Belgium	Men	2026	81.0847	83.213	85.1084	Projected	e0	LL	BEL
all-cause (indirect)	Belgium	Men	2027	81.3393	83.5032	85.421	Projected	e0	LL	BEL
all-cause (indirect)	Belgium	Men	2028	81.5729	83.782	85.738	Projected	e0	LL	BEL
all-cause (indirect)	Belgium	Men	2029	81.8099	84.0506	86.0472	Projected	e0	LL	BEL
all-cause (indirect)	Belgium	Men	2030	82.0529	84.322	86.3307	Projected	e0	LL	BEL
all-cause (indirect)	Belgium	Men	2031	82.2822	84.5811	86.6139	Projected	e0	LL	BEL
all-cause (indirect)	Belgium	Men	2032	82.5135	84.8358	86.894	Projected	e0	LL	BEL
all-cause (indirect)	Belgium	Men	2033	82.7371	85.0815	87.1631	Projected	e0	LL	BEL
all-cause (indirect)	Belgium	Men	2034	82.9443	85.3196	87.4038	Projected	e0	LL	BEL
all-cause (indirect)	Belgium	Men	2035	83.1517	85.5554	87.6434	Projected	e0	LL	BEL
all-cause (indirect)	Belgium	Men	2036	83.3807	85.7863	87.8954	Projected	e0	LL	BEL
all-cause (indirect)	Belgium	Men	2037	83.5649	86.0076	88.1286	Projected	e0	LL	BEL
all-cause (indirect)	Belgium	Men	2038	83.7617	86.2238	88.3654	Projected	e0	LL	BEL
all-cause (indirect)	Belgium	Men	2039	83.959	86.4384	88.5874	Projected	e0	LL	BEL
all-cause (indirect)	Belgium	Men	2040	84.1584	86.6442	88.8098	Projected	e0	LL	BEL
all-cause (indirect)	Belgium	Men	2041	84.3544	86.8422	89.0343	Projected	e0	LL	BEL
all-cause (indirect)	Belgium	Men	2042	84.5274	87.0496	89.2368	Projected	e0	LL	BEL
all-cause (indirect)	Belgium	Men	2043	84.7114	87.2484	89.4409	Projected	e0	LL	BEL
all-cause (indirect)	Belgium	Men	2044	84.8976	87.4368	89.6483	Projected	e0	LL	BEL
all-cause (indirect)	Belgium	Men	2045	85.0692	87.6276	89.8474	Projected	e0	LL	BEL
all-cause (indirect)	Belgium	Men	2046	85.2582	87.8143	90.0306	Projected	e0	LL	BEL
all-cause (indirect)	Belgium	Men	2047	85.4265	87.9971	90.2181	Projected	e0	LL	BEL
all-cause (indirect)	Belgium	Men	2048	85.6017	88.1742	90.4221	Projected	e0	LL	BEL
all-cause (indirect)	Belgium	Men	2049	85.7512	88.3563	90.606	Projected	e0	LL	BEL
all-cause (indirect)	Belgium	Men	2050	85.9354	88.5375	90.7858	Projected	e0	LL	BEL
all-cause (indirect)	Belgium	Men	2051	86.1126	88.7078	90.9592	Projected	e0	LL	BEL
all-cause (indirect)	Belgium	Men	2052	86.2865	88.8865	91.149	Projected	e0	LL	BEL
all-cause (indirect)	Belgium	Men	2053	86.4353	89.0567	91.3198	Projected	e0	LL	BEL
all-cause (indirect)	Belgium	Men	2054	86.5992	89.2241	91.4752	Projected	e0	LL	BEL
all-cause (indirect)	Belgium	Men	2055	86.7585	89.3866	91.641	Projected	e0	LL	BEL
all-cause (indirect)	Belgium	Men	2056	86.9195	89.553	91.8084	Projected	e0	LL	BEL
all-cause (indirect)	Belgium	Men	2057	87.0774	89.7137	91.9777	Projected	e0	LL	BEL
all-cause (indirect)	Belgium	Men	2058	87.2304	89.872	92.1324	Projected	e0	LL	BEL
all-cause (indirect)	Belgium	Men	2059	87.3713	90.0294	92.2852	Projected	e0	LL	BEL
all-cause (indirect)	Belgium	Men	2060	87.5405	90.1811	92.4356	Projected	e0	LL	BEL
all-cause (indirect)	Belgium	Men	2061	87.6946	90.3321	92.5954	Projected	e0	LL	BEL
all-cause (indirect)	Belgium	Men	2062	87.8398	90.4851	92.7421	Projected	e0	LL	BEL
all-cause (indirect)	Belgium	Men	2063	87.9933	90.6352	92.8859	Projected	e0	LL	BEL
all-cause (indirect)	Belgium	Men	2064	88.1344	90.7778	93.0331	Projected	e0	LL	BEL
all-cause (indirect)	Belgium	Men	2065	88.2975	90.9276	93.1675	Projected	e0	LL	BEL
all-cause (indirect)	Czech Republic	Men	1990		67.5308		Observed	e0	LL	CZE
all-cause (indirect)	Czech Republic	Men	1991		68.2322		Observed	e0	LL	CZE
all-cause (indirect)	Czech Republic	Men	1992		68.5215		Observed	e0	LL	CZE
all-cause (indirect)	Czech Republic	Men	1993		69.2473		Observed	e0	LL	CZE
all-cause (indirect)	Czech Republic	Men	1994		69.4891		Observed	e0	LL	CZE
all-cause (indirect)	Czech Republic	Men	1995		69.6644		Observed	e0	LL	CZE
all-cause (indirect)	Czech Republic	Men	1996		70.3055		Observed	e0	LL	CZE
all-cause (indirect)	Czech Republic	Men	1997		70.4216		Observed	e0	LL	CZE
all-cause (indirect)	Czech Republic	Men	1998		71.0483		Observed	e0	LL	CZE
all-cause (indirect)	Czech Republic	Men	1999		71.3329		Observed	e0	LL	CZE
all-cause (indirect)	Czech Republic	Men	2000		71.5518		Observed	e0	LL	CZE
all-cause (indirect)	Czech Republic	Men	2001		72.0241		Observed	e0	LL	CZE
all-cause (indirect)	Czech Republic	Men	2002		72.1023		Observed	e0	LL	CZE
all-cause (indirect)	Czech Republic	Men	2003		72.0846		Observed	e0	LL	CZE
all-cause (indirect)	Czech Republic	Men	2004		72.6117		Observed	e0	LL	CZE
all-cause (indirect)	Czech Republic	Men	2005		72.9513		Observed	e0	LL	CZE
all-cause (indirect)	Czech Republic	Men	2006		73.4759		Observed	e0	LL	CZE
all-cause (indirect)	Czech Republic	Men	2007		73.6986		Observed	e0	LL	CZE
all-cause (indirect)	Czech Republic	Men	2008		73.9675		Observed	e0	LL	CZE
all-cause (indirect)	Czech Republic	Men	2009		74.1596		Observed	e0	LL	CZE
all-cause (indirect)	Czech Republic	Men	2010		74.4332		Observed	e0	LL	CZE
all-cause (indirect)	Czech Republic	Men	2011		74.7197		Observed	e0	LL	CZE
all-cause (indirect)	Czech Republic	Men	2012		74.9654		Observed	e0	LL	CZE
all-cause (indirect)	Czech Republic	Men	2013		75.1477		Observed	e0	LL	CZE
all-cause (indirect)	Czech Republic	Men	2014		75.7177		Observed	e0	LL	CZE
all-cause (indirect)	Czech Republic	Men	2015	75.6007	76.4718	77.2986	Projected	e0	LL	CZE
all-cause (indirect)	Czech Republic	Men	2016	75.7277	76.7808	77.7841	Projected	e0	LL	CZE
all-cause (indirect)	Czech Republic	Men	2017	76.1872	77.4107	78.5404	Projected	e0	LL	CZE
all-cause (indirect)	Czech Republic	Men	2018	76.5001	77.8252	79.0496	Projected	e0	LL	CZE
all-cause (indirect)	Czech Republic	Men	2019	76.8311	78.2274	79.5244	Projected	e0	LL	CZE
all-cause (indirect)	Czech Republic	Men	2020	77.1184	78.6173	79.9808	Projected	e0	LL	CZE
all-cause (indirect)	Czech Republic	Men	2021	77.4198	78.9901	80.4006	Projected	e0	LL	CZE
all-cause (indirect)	Czech Republic	Men	2022	77.7405	79.3516	80.8122	Projected	e0	LL	CZE
all-cause (indirect)	Czech Republic	Men	2023	78.0274	79.697	81.2002	Projected	e0	LL	CZE
all-cause (indirect)	Czech Republic	Men	2024	78.3053	80.0254	81.5671	Projected	e0	LL	CZE
all-cause (indirect)	Czech Republic	Men	2025	78.5739	80.3435	81.9212	Projected	e0	LL	CZE
all-cause (indirect)	Czech Republic	Men	2026	78.849	80.6588	82.2557	Projected	e0	LL	CZE
all-cause (indirect)	Czech Republic	Men	2027	79.0956	80.9542	82.585	Projected	e0	LL	CZE
all-cause (indirect)	Czech Republic	Men	2028	79.3464	81.241	82.894	Projected	e0	LL	CZE
all-cause (indirect)	Czech Republic	Men	2029	79.5948	81.5299	83.2013	Projected	e0	LL	CZE
all-cause (indirect)	Czech Republic	Men	2030	79.8388	81.7999	83.4808	Projected	e0	LL	CZE
all-cause (indirect)	Czech Republic	Men	2031	80.0863	82.0649	83.7678	Projected	e0	LL	CZE
all-cause (indirect)	Czech Republic	Men	2032	80.3306	82.3292	84.0373	Projected	e0	LL	CZE
all-cause (indirect)	Czech Republic	Men	2033	80.5509	82.5797	84.2986	Projected	e0	LL	CZE
all-cause (indirect)	Czech Republic	Men	2034	80.7653	82.8289	84.5594	Projected	e0	LL	CZE
all-cause (indirect)	Czech Republic	Men	2035	80.981	83.0686	84.8212	Projected	e0	LL	CZE
all-cause (indirect)	Czech Republic	Men	2036	81.2229	83.3041	85.0707	Projected	e0	LL	CZE
all-cause (indirect)	Czech Republic	Men	2037	81.4353	83.5381	85.3142	Projected	e0	LL	CZE
all-cause (indirect)	Czech Republic	Men	2038	81.6405	83.7723	85.5439	Projected	e0	LL	CZE
all-cause (indirect)	Czech Republic	Men	2039	81.8499	83.9952	85.7606	Projected	e0	LL	CZE
all-cause (indirect)	Czech Republic	Men	2040	82.0739	84.212	85.9868	Projected	e0	LL	CZE
all-cause (indirect)	Czech Republic	Men	2041	82.2752	84.4293	86.2017	Projected	e0	LL	CZE
all-cause (indirect)	Czech Republic	Men	2042	82.4881	84.6435	86.4304	Projected	e0	LL	CZE
all-cause (indirect)	Czech Republic	Men	2043	82.686	84.8534	86.6448	Projected	e0	LL	CZE
all-cause (indirect)	Czech Republic	Men	2044	82.8963	85.0637	86.8407	Projected	e0	LL	CZE
all-cause (indirect)	Czech Republic	Men	2045	83.06	85.2627	87.0461	Projected	e0	LL	CZE
all-cause (indirect)	Czech Republic	Men	2046	83.2856	85.4613	87.2461	Projected	e0	LL	CZE
all-cause (indirect)	Czech Republic	Men	2047	83.4753	85.6569	87.4455	Projected	e0	LL	CZE
all-cause (indirect)	Czech Republic	Men	2048	83.6726	85.8493	87.6291	Projected	e0	LL	CZE
all-cause (indirect)	Czech Republic	Men	2049	83.8534	86.0403	87.8261	Projected	e0	LL	CZE
all-cause (indirect)	Czech Republic	Men	2050	84.0434	86.2322	88.0109	Projected	e0	LL	CZE
all-cause (indirect)	Czech Republic	Men	2051	84.2359	86.4223	88.1966	Projected	e0	LL	CZE
all-cause (indirect)	Czech Republic	Men	2052	84.4122	86.6052	88.3869	Projected	e0	LL	CZE
all-cause (indirect)	Czech Republic	Men	2053	84.6008	86.7958	88.5586	Projected	e0	LL	CZE
all-cause (indirect)	Czech Republic	Men	2054	84.7814	86.9743	88.7474	Projected	e0	LL	CZE
all-cause (indirect)	Czech Republic	Men	2055	84.9541	87.1548	88.9197	Projected	e0	LL	CZE
all-cause (indirect)	Czech Republic	Men	2056	85.1408	87.3311	89.09	Projected	e0	LL	CZE
all-cause (indirect)	Czech Republic	Men	2057	85.3149	87.5052	89.2596	Projected	e0	LL	CZE
all-cause (indirect)	Czech Republic	Men	2058	85.4969	87.6833	89.4223	Projected	e0	LL	CZE
all-cause (indirect)	Czech Republic	Men	2059	85.6641	87.8489	89.6025	Projected	e0	LL	CZE
all-cause (indirect)	Czech Republic	Men	2060	85.8437	88.0257	89.7603	Projected	e0	LL	CZE
all-cause (indirect)	Czech Republic	Men	2061	86.0106	88.1931	89.9292	Projected	e0	LL	CZE
all-cause (indirect)	Czech Republic	Men	2062	86.1929	88.363	90.0821	Projected	e0	LL	CZE
all-cause (indirect)	Czech Republic	Men	2063	86.3673	88.5289	90.2337	Projected	e0	LL	CZE
all-cause (indirect)	Czech Republic	Men	2064	86.5447	88.6938	90.3956	Projected	e0	LL	CZE
all-cause (indirect)	Czech Republic	Men	2065	86.7083	88.8574	90.5512	Projected	e0	LL	CZE
all-cause (indirect)	Denmark	Men	1990		72.0205		Observed	e0	LL	DNK
all-cause (indirect)	Denmark	Men	1991		72.472		Observed	e0	LL	DNK
all-cause (indirect)	Denmark	Men	1992		72.5603		Observed	e0	LL	DNK
all-cause (indirect)	Denmark	Men	1993		72.593		Observed	e0	LL	DNK
all-cause (indirect)	Denmark	Men	1994		72.7735		Observed	e0	LL	DNK
all-cause (indirect)	Denmark	Men	1995		72.7262		Observed	e0	LL	DNK
all-cause (indirect)	Denmark	Men	1996		73.051		Observed	e0	LL	DNK
all-cause (indirect)	Denmark	Men	1997		73.5578		Observed	e0	LL	DNK
all-cause (indirect)	Denmark	Men	1998		73.9403		Observed	e0	LL	DNK
all-cause (indirect)	Denmark	Men	1999		74.2002		Observed	e0	LL	DNK
all-cause (indirect)	Denmark	Men	2000		74.4346		Observed	e0	LL	DNK
all-cause (indirect)	Denmark	Men	2001		74.6681		Observed	e0	LL	DNK
all-cause (indirect)	Denmark	Men	2002		74.8		Observed	e0	LL	DNK
all-cause (indirect)	Denmark	Men	2003		75.2804		Observed	e0	LL	DNK
all-cause (indirect)	Denmark	Men	2004		75.1489		Observed	e0	LL	DNK
all-cause (indirect)	Denmark	Men	2005		75.9334		Observed	e0	LL	DNK
all-cause (indirect)	Denmark	Men	2006		75.8926		Observed	e0	LL	DNK
all-cause (indirect)	Denmark	Men	2007		76.1261		Observed	e0	LL	DNK
all-cause (indirect)	Denmark	Men	2008		76.4814		Observed	e0	LL	DNK
all-cause (indirect)	Denmark	Men	2009		76.8442		Observed	e0	LL	DNK
all-cause (indirect)	Denmark	Men	2010		77.1133		Observed	e0	LL	DNK
all-cause (indirect)	Denmark	Men	2011		77.7073		Observed	e0	LL	DNK
all-cause (indirect)	Denmark	Men	2012		78.0567		Observed	e0	LL	DNK
all-cause (indirect)	Denmark	Men	2013		78.2629		Observed	e0	LL	DNK
all-cause (indirect)	Denmark	Men	2014		78.5638		Observed	e0	LL	DNK
all-cause (indirect)	Denmark	Men	2015	78.4176	79.561	80.6798	Projected	e0	LL	DNK
all-cause (indirect)	Denmark	Men	2016	78.5328	80.0052	81.4263	Projected	e0	LL	DNK
all-cause (indirect)	Denmark	Men	2017	78.5845	80.3164	81.94	Projected	e0	LL	DNK
all-cause (indirect)	Denmark	Men	2018	78.6695	80.5905	82.3895	Projected	e0	LL	DNK
all-cause (indirect)	Denmark	Men	2019	78.7579	80.8712	82.8249	Projected	e0	LL	DNK
all-cause (indirect)	Denmark	Men	2020	78.8873	81.1616	83.2437	Projected	e0	LL	DNK
all-cause (indirect)	Denmark	Men	2021	79.0386	81.4443	83.6252	Projected	e0	LL	DNK
all-cause (indirect)	Denmark	Men	2022	79.175	81.7183	83.9955	Projected	e0	LL	DNK
all-cause (indirect)	Denmark	Men	2023	79.3364	81.993	84.378	Projected	e0	LL	DNK
all-cause (indirect)	Denmark	Men	2024	79.5058	82.2617	84.7284	Projected	e0	LL	DNK
all-cause (indirect)	Denmark	Men	2025	79.6889	82.5384	85.0735	Projected	e0	LL	DNK
all-cause (indirect)	Denmark	Men	2026	79.8622	82.8027	85.3858	Projected	e0	LL	DNK
all-cause (indirect)	Denmark	Men	2027	80.0254	83.0589	85.7127	Projected	e0	LL	DNK
all-cause (indirect)	Denmark	Men	2028	80.2192	83.3212	86.0159	Projected	e0	LL	DNK
all-cause (indirect)	Denmark	Men	2029	80.3854	83.5712	86.3072	Projected	e0	LL	DNK
all-cause (indirect)	Denmark	Men	2030	80.578	83.8196	86.6288	Projected	e0	LL	DNK
all-cause (indirect)	Denmark	Men	2031	80.7393	84.055	86.8867	Projected	e0	LL	DNK
all-cause (indirect)	Denmark	Men	2032	80.9136	84.2962	87.1575	Projected	e0	LL	DNK
all-cause (indirect)	Denmark	Men	2033	81.1033	84.5302	87.4417	Projected	e0	LL	DNK
all-cause (indirect)	Denmark	Men	2034	81.2582	84.7594	87.7092	Projected	e0	LL	DNK
all-cause (indirect)	Denmark	Men	2035	81.453	84.9866	87.9668	Projected	e0	LL	DNK
all-cause (indirect)	Denmark	Men	2036	81.6246	85.2109	88.2149	Projected	e0	LL	DNK
all-cause (indirect)	Denmark	Men	2037	81.8235	85.4315	88.4659	Projected	e0	LL	DNK
all-cause (indirect)	Denmark	Men	2038	81.9869	85.6404	88.6944	Projected	e0	LL	DNK
all-cause (indirect)	Denmark	Men	2039	82.1328	85.855	88.9139	Projected	e0	LL	DNK
all-cause (indirect)	Denmark	Men	2040	82.3167	86.0618	89.1392	Projected	e0	LL	DNK
all-cause (indirect)	Denmark	Men	2041	82.4579	86.2671	89.3518	Projected	e0	LL	DNK
all-cause (indirect)	Denmark	Men	2042	82.6684	86.4737	89.5805	Projected	e0	LL	DNK
all-cause (indirect)	Denmark	Men	2043	82.8267	86.6719	89.8102	Projected	e0	LL	DNK
all-cause (indirect)	Denmark	Men	2044	82.9963	86.8737	90.0291	Projected	e0	LL	DNK
all-cause (indirect)	Denmark	Men	2045	83.1549	87.061	90.2255	Projected	e0	LL	DNK
all-cause (indirect)	Denmark	Men	2046	83.3236	87.2527	90.4002	Projected	e0	LL	DNK
all-cause (indirect)	Denmark	Men	2047	83.4707	87.4421	90.6133	Projected	e0	LL	DNK
all-cause (indirect)	Denmark	Men	2048	83.6427	87.6273	90.7783	Projected	e0	LL	DNK
all-cause (indirect)	Denmark	Men	2049	83.7983	87.8224	90.9847	Projected	e0	LL	DNK
all-cause (indirect)	Denmark	Men	2050	83.9566	88.0026	91.1799	Projected	e0	LL	DNK
all-cause (indirect)	Denmark	Men	2051	84.1224	88.1795	91.377	Projected	e0	LL	DNK
all-cause (indirect)	Denmark	Men	2052	84.2865	88.359	91.5355	Projected	e0	LL	DNK
all-cause (indirect)	Denmark	Men	2053	84.4678	88.5349	91.722	Projected	e0	LL	DNK
all-cause (indirect)	Denmark	Men	2054	84.618	88.7108	91.8892	Projected	e0	LL	DNK
all-cause (indirect)	Denmark	Men	2055	84.7611	88.8815	92.0457	Projected	e0	LL	DNK
all-cause (indirect)	Denmark	Men	2056	84.9229	89.0516	92.2318	Projected	e0	LL	DNK
all-cause (indirect)	Denmark	Men	2057	85.0763	89.2189	92.3946	Projected	e0	LL	DNK
all-cause (indirect)	Denmark	Men	2058	85.2526	89.389	92.5579	Projected	e0	LL	DNK
all-cause (indirect)	Denmark	Men	2059	85.4017	89.5565	92.7222	Projected	e0	LL	DNK
all-cause (indirect)	Denmark	Men	2060	85.5337	89.7192	92.8683	Projected	e0	LL	DNK
all-cause (indirect)	Denmark	Men	2061	85.7132	89.8889	93.0137	Projected	e0	LL	DNK
all-cause (indirect)	Denmark	Men	2062	85.8373	90.0399	93.1731	Projected	e0	LL	DNK
all-cause (indirect)	Denmark	Men	2063	86.0322	90.1951	93.3105	Projected	e0	LL	DNK
all-cause (indirect)	Denmark	Men	2064	86.1603	90.349	93.4691	Projected	e0	LL	DNK
all-cause (indirect)	Denmark	Men	2065	86.3141	90.5012	93.6154	Projected	e0	LL	DNK
all-cause (indirect)	Finland	Men	1990		70.9407		Observed	e0	LL	FIN
all-cause (indirect)	Finland	Men	1991		71.3346		Observed	e0	LL	FIN
all-cause (indirect)	Finland	Men	1992		71.672		Observed	e0	LL	FIN
all-cause (indirect)	Finland	Men	1993		72.1092		Observed	e0	LL	FIN
all-cause (indirect)	Finland	Men	1994		72.7911		Observed	e0	LL	FIN
all-cause (indirect)	Finland	Men	1995		72.8091		Observed	e0	LL	FIN
all-cause (indirect)	Finland	Men	1996		73.0303		Observed	e0	LL	FIN
all-cause (indirect)	Finland	Men	1997		73.4318		Observed	e0	LL	FIN
all-cause (indirect)	Finland	Men	1998		73.5117		Observed	e0	LL	FIN
all-cause (indirect)	Finland	Men	1999		73.7381		Observed	e0	LL	FIN
all-cause (indirect)	Finland	Men	2000		74.15		Observed	e0	LL	FIN
all-cause (indirect)	Finland	Men	2001		74.5755		Observed	e0	LL	FIN
all-cause (indirect)	Finland	Men	2002		74.8612		Observed	e0	LL	FIN
all-cause (indirect)	Finland	Men	2003		75.1247		Observed	e0	LL	FIN
all-cause (indirect)	Finland	Men	2004		75.3013		Observed	e0	LL	FIN
all-cause (indirect)	Finland	Men	2005		75.5281		Observed	e0	LL	FIN
all-cause (indirect)	Finland	Men	2006		75.8171		Observed	e0	LL	FIN
all-cause (indirect)	Finland	Men	2007		75.853		Observed	e0	LL	FIN
all-cause (indirect)	Finland	Men	2008		76.333		Observed	e0	LL	FIN
all-cause (indirect)	Finland	Men	2009		76.4761		Observed	e0	LL	FIN
all-cause (indirect)	Finland	Men	2010		76.7191		Observed	e0	LL	FIN
all-cause (indirect)	Finland	Men	2011		77.1877		Observed	e0	LL	FIN
all-cause (indirect)	Finland	Men	2012		77.5012		Observed	e0	LL	FIN
all-cause (indirect)	Finland	Men	2013		77.8735		Observed	e0	LL	FIN
all-cause (indirect)	Finland	Men	2014		78.1287		Observed	e0	LL	FIN
all-cause (indirect)	Finland	Men	2015	77.8292	78.6598	79.4193	Projected	e0	LL	FIN
all-cause (indirect)	Finland	Men	2016	77.9385	79.0067	79.965	Projected	e0	LL	FIN
all-cause (indirect)	Finland	Men	2017	78.1882	79.3635	80.4047	Projected	e0	LL	FIN
all-cause (indirect)	Finland	Men	2018	78.3721	79.673	80.7879	Projected	e0	LL	FIN
all-cause (indirect)	Finland	Men	2019	78.5818	79.984	81.1859	Projected	e0	LL	FIN
all-cause (indirect)	Finland	Men	2020	78.7865	80.2818	81.5428	Projected	e0	LL	FIN
all-cause (indirect)	Finland	Men	2021	78.9942	80.5827	81.9031	Projected	e0	LL	FIN
all-cause (indirect)	Finland	Men	2022	79.2155	80.8691	82.2446	Projected	e0	LL	FIN
all-cause (indirect)	Finland	Men	2023	79.4371	81.1554	82.5756	Projected	e0	LL	FIN
all-cause (indirect)	Finland	Men	2024	79.6342	81.4398	82.9126	Projected	e0	LL	FIN
all-cause (indirect)	Finland	Men	2025	79.8586	81.7185	83.2287	Projected	e0	LL	FIN
all-cause (indirect)	Finland	Men	2026	80.0989	81.997	83.5374	Projected	e0	LL	FIN
all-cause (indirect)	Finland	Men	2027	80.3096	82.2719	83.8413	Projected	e0	LL	FIN
all-cause (indirect)	Finland	Men	2028	80.5543	82.5409	84.137	Projected	e0	LL	FIN
all-cause (indirect)	Finland	Men	2029	80.7688	82.8079	84.428	Projected	e0	LL	FIN
all-cause (indirect)	Finland	Men	2030	81.019	83.066	84.7027	Projected	e0	LL	FIN
all-cause (indirect)	Finland	Men	2031	81.2487	83.3316	85.0003	Projected	e0	LL	FIN
all-cause (indirect)	Finland	Men	2032	81.4641	83.5871	85.2639	Projected	e0	LL	FIN
all-cause (indirect)	Finland	Men	2033	81.7036	83.8435	85.5373	Projected	e0	LL	FIN
all-cause (indirect)	Finland	Men	2034	81.9365	84.0904	85.7993	Projected	e0	LL	FIN
all-cause (indirect)	Finland	Men	2035	82.1713	84.3321	86.0488	Projected	e0	LL	FIN
all-cause (indirect)	Finland	Men	2036	82.4151	84.5764	86.3021	Projected	e0	LL	FIN
all-cause (indirect)	Finland	Men	2037	82.6396	84.8132	86.557	Projected	e0	LL	FIN
all-cause (indirect)	Finland	Men	2038	82.8684	85.0522	86.7967	Projected	e0	LL	FIN
all-cause (indirect)	Finland	Men	2039	83.0977	85.2747	87.0217	Projected	e0	LL	FIN
all-cause (indirect)	Finland	Men	2040	83.2892	85.507	87.2621	Projected	e0	LL	FIN
all-cause (indirect)	Finland	Men	2041	83.4931	85.7238	87.4928	Projected	e0	LL	FIN
all-cause (indirect)	Finland	Men	2042	83.7185	85.9524	87.7208	Projected	e0	LL	FIN
all-cause (indirect)	Finland	Men	2043	83.9294	86.1626	87.9486	Projected	e0	LL	FIN
all-cause (indirect)	Finland	Men	2044	84.1278	86.3796	88.1623	Projected	e0	LL	FIN
all-cause (indirect)	Finland	Men	2045	84.3354	86.5831	88.3826	Projected	e0	LL	FIN
all-cause (indirect)	Finland	Men	2046	84.548	86.7949	88.5854	Projected	e0	LL	FIN
all-cause (indirect)	Finland	Men	2047	84.7373	86.998	88.7932	Projected	e0	LL	FIN
all-cause (indirect)	Finland	Men	2048	84.9423	87.1973	88.9965	Projected	e0	LL	FIN
all-cause (indirect)	Finland	Men	2049	85.128	87.3957	89.2006	Projected	e0	LL	FIN
all-cause (indirect)	Finland	Men	2050	85.3248	87.5918	89.3984	Projected	e0	LL	FIN
all-cause (indirect)	Finland	Men	2051	85.487	87.7834	89.6005	Projected	e0	LL	FIN
all-cause (indirect)	Finland	Men	2052	85.6881	87.9771	89.7843	Projected	e0	LL	FIN
all-cause (indirect)	Finland	Men	2053	85.8775	88.1631	89.9819	Projected	e0	LL	FIN
all-cause (indirect)	Finland	Men	2054	86.0522	88.3535	90.1695	Projected	e0	LL	FIN
all-cause (indirect)	Finland	Men	2055	86.2574	88.5362	90.3439	Projected	e0	LL	FIN
all-cause (indirect)	Finland	Men	2056	86.4349	88.7122	90.5327	Projected	e0	LL	FIN
all-cause (indirect)	Finland	Men	2057	86.6008	88.887	90.7094	Projected	e0	LL	FIN
all-cause (indirect)	Finland	Men	2058	86.7817	89.0655	90.8814	Projected	e0	LL	FIN
all-cause (indirect)	Finland	Men	2059	86.9715	89.2361	91.0508	Projected	e0	LL	FIN
all-cause (indirect)	Finland	Men	2060	87.141	89.4037	91.2282	Projected	e0	LL	FIN
all-cause (indirect)	Finland	Men	2061	87.3075	89.5731	91.3807	Projected	e0	LL	FIN
all-cause (indirect)	Finland	Men	2062	87.4733	89.7424	91.5625	Projected	e0	LL	FIN
all-cause (indirect)	Finland	Men	2063	87.6297	89.9045	91.7151	Projected	e0	LL	FIN
all-cause (indirect)	Finland	Men	2064	87.786	90.0616	91.881	Projected	e0	LL	FIN
all-cause (indirect)	Finland	Men	2065	87.9519	90.2211	92.0399	Projected	e0	LL	FIN
all-cause (indirect)	France	Men	1990		72.7201		Observed	e0	LL	FRATNP
all-cause (indirect)	France	Men	1991		72.8756		Observed	e0	LL	FRATNP
all-cause (indirect)	France	Men	1992		73.1459		Observed	e0	LL	FRATNP
all-cause (indirect)	France	Men	1993		73.2453		Observed	e0	LL	FRATNP
all-cause (indirect)	France	Men	1994		73.6439		Observed	e0	LL	FRATNP
all-cause (indirect)	France	Men	1995		73.8333		Observed	e0	LL	FRATNP
all-cause (indirect)	France	Men	1996		74.0627		Observed	e0	LL	FRATNP
all-cause (indirect)	France	Men	1997		74.5056		Observed	e0	LL	FRATNP
all-cause (indirect)	France	Men	1998		74.7222		Observed	e0	LL	FRATNP
all-cause (indirect)	France	Men	1999		74.9391		Observed	e0	LL	FRATNP
all-cause (indirect)	France	Men	2000		75.235		Observed	e0	LL	FRATNP
all-cause (indirect)	France	Men	2001		75.4314		Observed	e0	LL	FRATNP
all-cause (indirect)	France	Men	2002		75.7063		Observed	e0	LL	FRATNP
all-cause (indirect)	France	Men	2003		75.809		Observed	e0	LL	FRATNP
all-cause (indirect)	France	Men	2004		76.6758		Observed	e0	LL	FRATNP
all-cause (indirect)	France	Men	2005		76.72		Observed	e0	LL	FRATNP
all-cause (indirect)	France	Men	2006		77.1623		Observed	e0	LL	FRATNP
all-cause (indirect)	France	Men	2007		77.3914		Observed	e0	LL	FRATNP
all-cause (indirect)	France	Men	2008		77.5963		Observed	e0	LL	FRATNP
all-cause (indirect)	France	Men	2009		77.7549		Observed	e0	LL	FRATNP
all-cause (indirect)	France	Men	2010		78.019		Observed	e0	LL	FRATNP
all-cause (indirect)	France	Men	2011		78.4308		Observed	e0	LL	FRATNP
all-cause (indirect)	France	Men	2012		78.4939		Observed	e0	LL	FRATNP
all-cause (indirect)	France	Men	2013		78.7713		Observed	e0	LL	FRATNP
all-cause (indirect)	France	Men	2014		79.2806		Observed	e0	LL	FRATNP
all-cause (indirect)	France	Men	2015	79.3353	80.1136	80.86	Projected	e0	LL	FRATNP
all-cause (indirect)	France	Men	2016	79.4382	80.4001	81.3152	Projected	e0	LL	FRATNP
all-cause (indirect)	France	Men	2017	79.6323	80.703	81.7184	Projected	e0	LL	FRATNP
all-cause (indirect)	France	Men	2018	79.8173	81.0016	82.1195	Projected	e0	LL	FRATNP
all-cause (indirect)	France	Men	2019	80.0298	81.3017	82.4864	Projected	e0	LL	FRATNP
all-cause (indirect)	France	Men	2020	80.2427	81.5976	82.8581	Projected	e0	LL	FRATNP
all-cause (indirect)	France	Men	2021	80.473	81.8911	83.2121	Projected	e0	LL	FRATNP
all-cause (indirect)	France	Men	2022	80.6853	82.1791	83.547	Projected	e0	LL	FRATNP
all-cause (indirect)	France	Men	2023	80.9184	82.466	83.8765	Projected	e0	LL	FRATNP
all-cause (indirect)	France	Men	2024	81.1397	82.7512	84.1956	Projected	e0	LL	FRATNP
all-cause (indirect)	France	Men	2025	81.3712	83.0247	84.5022	Projected	e0	LL	FRATNP
all-cause (indirect)	France	Men	2026	81.6165	83.3066	84.8026	Projected	e0	LL	FRATNP
all-cause (indirect)	France	Men	2027	81.8534	83.5721	85.1012	Projected	e0	LL	FRATNP
all-cause (indirect)	France	Men	2028	82.0929	83.8427	85.3869	Projected	e0	LL	FRATNP
all-cause (indirect)	France	Men	2029	82.3369	84.106	85.6771	Projected	e0	LL	FRATNP
all-cause (indirect)	France	Men	2030	82.5763	84.3721	85.9491	Projected	e0	LL	FRATNP
all-cause (indirect)	France	Men	2031	82.8125	84.6324	86.2259	Projected	e0	LL	FRATNP
all-cause (indirect)	France	Men	2032	83.0484	84.8849	86.4915	Projected	e0	LL	FRATNP
all-cause (indirect)	France	Men	2033	83.2857	85.1397	86.7602	Projected	e0	LL	FRATNP
all-cause (indirect)	France	Men	2034	83.5204	85.3841	87.0198	Projected	e0	LL	FRATNP
all-cause (indirect)	France	Men	2035	83.7378	85.6307	87.2533	Projected	e0	LL	FRATNP
all-cause (indirect)	France	Men	2036	83.9662	85.8735	87.5195	Projected	e0	LL	FRATNP
all-cause (indirect)	France	Men	2037	84.1865	86.1128	87.7617	Projected	e0	LL	FRATNP
all-cause (indirect)	France	Men	2038	84.4184	86.3456	87.9968	Projected	e0	LL	FRATNP
all-cause (indirect)	France	Men	2039	84.6399	86.576	88.233	Projected	e0	LL	FRATNP
all-cause (indirect)	France	Men	2040	84.8743	86.8011	88.4669	Projected	e0	LL	FRATNP
all-cause (indirect)	France	Men	2041	85.0818	87.0265	88.6801	Projected	e0	LL	FRATNP
all-cause (indirect)	France	Men	2042	85.2885	87.2419	88.9014	Projected	e0	LL	FRATNP
all-cause (indirect)	France	Men	2043	85.5159	87.4563	89.1101	Projected	e0	LL	FRATNP
all-cause (indirect)	France	Men	2044	85.7098	87.6655	89.3255	Projected	e0	LL	FRATNP
all-cause (indirect)	France	Men	2045	85.9203	87.8733	89.5302	Projected	e0	LL	FRATNP
all-cause (indirect)	France	Men	2046	86.1349	88.0818	89.7301	Projected	e0	LL	FRATNP
all-cause (indirect)	France	Men	2047	86.3399	88.2827	89.9259	Projected	e0	LL	FRATNP
all-cause (indirect)	France	Men	2048	86.5393	88.4829	90.1227	Projected	e0	LL	FRATNP
all-cause (indirect)	France	Men	2049	86.7412	88.6758	90.314	Projected	e0	LL	FRATNP
all-cause (indirect)	France	Men	2050	86.9383	88.867	90.4988	Projected	e0	LL	FRATNP
all-cause (indirect)	France	Men	2051	87.1245	89.0539	90.6697	Projected	e0	LL	FRATNP
all-cause (indirect)	France	Men	2052	87.3201	89.2365	90.8454	Projected	e0	LL	FRATNP
all-cause (indirect)	France	Men	2053	87.5121	89.4249	91.0147	Projected	e0	LL	FRATNP
all-cause (indirect)	France	Men	2054	87.6911	89.6041	91.1932	Projected	e0	LL	FRATNP
all-cause (indirect)	France	Men	2055	87.8799	89.7844	91.3655	Projected	e0	LL	FRATNP
all-cause (indirect)	France	Men	2056	88.0456	89.9582	91.5251	Projected	e0	LL	FRATNP
all-cause (indirect)	France	Men	2057	88.2334	90.1236	91.685	Projected	e0	LL	FRATNP
all-cause (indirect)	France	Men	2058	88.4077	90.2926	91.8494	Projected	e0	LL	FRATNP
all-cause (indirect)	France	Men	2059	88.5852	90.4586	92.0073	Projected	e0	LL	FRATNP
all-cause (indirect)	France	Men	2060	88.741	90.6194	92.1605	Projected	e0	LL	FRATNP
all-cause (indirect)	France	Men	2061	88.9123	90.7813	92.31	Projected	e0	LL	FRATNP
all-cause (indirect)	France	Men	2062	89.0728	90.941	92.4576	Projected	e0	LL	FRATNP
all-cause (indirect)	France	Men	2063	89.2437	91.0949	92.5998	Projected	e0	LL	FRATNP
all-cause (indirect)	France	Men	2064	89.3978	91.2479	92.7428	Projected	e0	LL	FRATNP
all-cause (indirect)	France	Men	2065	89.5688	91.3952	92.8823	Projected	e0	LL	FRATNP
all-cause (indirect)	Germany	Men	1990		71.9098		Observed	e0	LL	DEUTNP
all-cause (indirect)	Germany	Men	1991		72.0939		Observed	e0	LL	DEUTNP
all-cause (indirect)	Germany	Men	1992		72.5286		Observed	e0	LL	DEUTNP
all-cause (indirect)	Germany	Men	1993		72.6334		Observed	e0	LL	DEUTNP
all-cause (indirect)	Germany	Men	1994		72.9468		Observed	e0	LL	DEUTNP
all-cause (indirect)	Germany	Men	1995		73.1183		Observed	e0	LL	DEUTNP
all-cause (indirect)	Germany	Men	1996		73.4201		Observed	e0	LL	DEUTNP
all-cause (indirect)	Germany	Men	1997		73.8777		Observed	e0	LL	DEUTNP
all-cause (indirect)	Germany	Men	1998		74.3144		Observed	e0	LL	DEUTNP
all-cause (indirect)	Germany	Men	1999		74.5748		Observed	e0	LL	DEUTNP
all-cause (indirect)	Germany	Men	2000		74.8565		Observed	e0	LL	DEUTNP
all-cause (indirect)	Germany	Men	2001		75.2753		Observed	e0	LL	DEUTNP
all-cause (indirect)	Germany	Men	2002		75.439		Observed	e0	LL	DEUTNP
all-cause (indirect)	Germany	Men	2003		75.514		Observed	e0	LL	DEUTNP
all-cause (indirect)	Germany	Men	2004		76.1484		Observed	e0	LL	DEUTNP
all-cause (indirect)	Germany	Men	2005		76.3549		Observed	e0	LL	DEUTNP
all-cause (indirect)	Germany	Men	2006		76.7511		Observed	e0	LL	DEUTNP
all-cause (indirect)	Germany	Men	2007		76.9116		Observed	e0	LL	DEUTNP
all-cause (indirect)	Germany	Men	2008		77.1052		Observed	e0	LL	DEUTNP
all-cause (indirect)	Germany	Men	2009		77.2337		Observed	e0	LL	DEUTNP
all-cause (indirect)	Germany	Men	2010		77.4334		Observed	e0	LL	DEUTNP
all-cause (indirect)	Germany	Men	2011		77.7714		Observed	e0	LL	DEUTNP
all-cause (indirect)	Germany	Men	2012		77.9655		Observed	e0	LL	DEUTNP
all-cause (indirect)	Germany	Men	2013		77.9827		Observed	e0	LL	DEUTNP
all-cause (indirect)	Germany	Men	2014		78.4329		Observed	e0	LL	DEUTNP
all-cause (indirect)	Germany	Men	2015	78.2839	79.1275	79.9241	Projected	e0	LL	DEUTNP
all-cause (indirect)	Germany	Men	2016	78.4323	79.4576	80.4276	Projected	e0	LL	DEUTNP
all-cause (indirect)	Germany	Men	2017	78.5916	79.7506	80.8077	Projected	e0	LL	DEUTNP
all-cause (indirect)	Germany	Men	2018	78.7572	80.0399	81.2071	Projected	e0	LL	DEUTNP
all-cause (indirect)	Germany	Men	2019	78.945	80.3263	81.5683	Projected	e0	LL	DEUTNP
all-cause (indirect)	Germany	Men	2020	79.1484	80.6094	81.9317	Projected	e0	LL	DEUTNP
all-cause (indirect)	Germany	Men	2021	79.3465	80.8856	82.2667	Projected	e0	LL	DEUTNP
all-cause (indirect)	Germany	Men	2022	79.5621	81.1697	82.5977	Projected	e0	LL	DEUTNP
all-cause (indirect)	Germany	Men	2023	79.7546	81.4387	82.9139	Projected	e0	LL	DEUTNP
all-cause (indirect)	Germany	Men	2024	79.9678	81.7102	83.2274	Projected	e0	LL	DEUTNP
all-cause (indirect)	Germany	Men	2025	80.1674	81.9702	83.5411	Projected	e0	LL	DEUTNP
all-cause (indirect)	Germany	Men	2026	80.3992	82.2364	83.8367	Projected	e0	LL	DEUTNP
all-cause (indirect)	Germany	Men	2027	80.6068	82.4963	84.1413	Projected	e0	LL	DEUTNP
all-cause (indirect)	Germany	Men	2028	80.8301	82.75	84.4124	Projected	e0	LL	DEUTNP
all-cause (indirect)	Germany	Men	2029	81.0506	83.0019	84.7056	Projected	e0	LL	DEUTNP
all-cause (indirect)	Germany	Men	2030	81.2655	83.2499	84.9646	Projected	e0	LL	DEUTNP
all-cause (indirect)	Germany	Men	2031	81.4705	83.4954	85.2134	Projected	e0	LL	DEUTNP
all-cause (indirect)	Germany	Men	2032	81.6777	83.7319	85.4809	Projected	e0	LL	DEUTNP
all-cause (indirect)	Germany	Men	2033	81.8891	83.9732	85.7406	Projected	e0	LL	DEUTNP
all-cause (indirect)	Germany	Men	2034	82.0796	84.2049	85.9879	Projected	e0	LL	DEUTNP
all-cause (indirect)	Germany	Men	2035	82.2991	84.4347	86.2373	Projected	e0	LL	DEUTNP
all-cause (indirect)	Germany	Men	2036	82.5105	84.6611	86.4698	Projected	e0	LL	DEUTNP
all-cause (indirect)	Germany	Men	2037	82.6991	84.8827	86.7159	Projected	e0	LL	DEUTNP
all-cause (indirect)	Germany	Men	2038	82.8955	85.1107	86.9416	Projected	e0	LL	DEUTNP
all-cause (indirect)	Germany	Men	2039	83.0962	85.3289	87.1568	Projected	e0	LL	DEUTNP
all-cause (indirect)	Germany	Men	2040	83.2998	85.5404	87.3863	Projected	e0	LL	DEUTNP
all-cause (indirect)	Germany	Men	2041	83.4828	85.7537	87.6144	Projected	e0	LL	DEUTNP
all-cause (indirect)	Germany	Men	2042	83.6901	85.9615	87.831	Projected	e0	LL	DEUTNP
all-cause (indirect)	Germany	Men	2043	83.8755	86.1693	88.0404	Projected	e0	LL	DEUTNP
all-cause (indirect)	Germany	Men	2044	84.0893	86.3776	88.2501	Projected	e0	LL	DEUTNP
all-cause (indirect)	Germany	Men	2045	84.2822	86.5822	88.4535	Projected	e0	LL	DEUTNP
all-cause (indirect)	Germany	Men	2046	84.4767	86.7798	88.6558	Projected	e0	LL	DEUTNP
all-cause (indirect)	Germany	Men	2047	84.6604	86.9826	88.8651	Projected	e0	LL	DEUTNP
all-cause (indirect)	Germany	Men	2048	84.8585	87.1751	89.0621	Projected	e0	LL	DEUTNP
all-cause (indirect)	Germany	Men	2049	85.055	87.3706	89.2518	Projected	e0	LL	DEUTNP
all-cause (indirect)	Germany	Men	2050	85.2428	87.5632	89.444	Projected	e0	LL	DEUTNP
all-cause (indirect)	Germany	Men	2051	85.4275	87.7538	89.6369	Projected	e0	LL	DEUTNP
all-cause (indirect)	Germany	Men	2052	85.611	87.9442	89.8138	Projected	e0	LL	DEUTNP
all-cause (indirect)	Germany	Men	2053	85.7999	88.1231	90.0051	Projected	e0	LL	DEUTNP
all-cause (indirect)	Germany	Men	2054	85.9939	88.3117	90.1918	Projected	e0	LL	DEUTNP
all-cause (indirect)	Germany	Men	2055	86.1697	88.4947	90.3594	Projected	e0	LL	DEUTNP
all-cause (indirect)	Germany	Men	2056	86.3524	88.669	90.5446	Projected	e0	LL	DEUTNP
all-cause (indirect)	Germany	Men	2057	86.5345	88.8441	90.7122	Projected	e0	LL	DEUTNP
all-cause (indirect)	Germany	Men	2058	86.7014	89.0184	90.879	Projected	e0	LL	DEUTNP
all-cause (indirect)	Germany	Men	2059	86.8757	89.1914	91.0414	Projected	e0	LL	DEUTNP
all-cause (indirect)	Germany	Men	2060	87.0594	89.3643	91.2118	Projected	e0	LL	DEUTNP
all-cause (indirect)	Germany	Men	2061	87.2249	89.5279	91.3632	Projected	e0	LL	DEUTNP
all-cause (indirect)	Germany	Men	2062	87.4006	89.6925	91.5232	Projected	e0	LL	DEUTNP
all-cause (indirect)	Germany	Men	2063	87.5704	89.8555	91.6848	Projected	e0	LL	DEUTNP
all-cause (indirect)	Germany	Men	2064	87.742	90.0221	91.8334	Projected	e0	LL	DEUTNP
all-cause (indirect)	Germany	Men	2065	87.8933	90.176	91.9895	Projected	e0	LL	DEUTNP
all-cause (indirect)	Greece	Men	1990		74.6593		Observed	e0	LL	GRC
all-cause (indirect)	Greece	Men	1991		74.6591		Observed	e0	LL	GRC
all-cause (indirect)	Greece	Men	1992		74.6178		Observed	e0	LL	GRC
all-cause (indirect)	Greece	Men	1993		74.8718		Observed	e0	LL	GRC
all-cause (indirect)	Greece	Men	1994		75.0501		Observed	e0	LL	GRC
all-cause (indirect)	Greece	Men	1995		74.9266		Observed	e0	LL	GRC
all-cause (indirect)	Greece	Men	1996		75.0424		Observed	e0	LL	GRC
all-cause (indirect)	Greece	Men	1997		75.4238		Observed	e0	LL	GRC
all-cause (indirect)	Greece	Men	1998		75.5054		Observed	e0	LL	GRC
all-cause (indirect)	Greece	Men	1999		75.5575		Observed	e0	LL	GRC
all-cause (indirect)	Greece	Men	2000		75.6578		Observed	e0	LL	GRC
all-cause (indirect)	Greece	Men	2001		76.1288		Observed	e0	LL	GRC
all-cause (indirect)	Greece	Men	2002		76.4045		Observed	e0	LL	GRC
all-cause (indirect)	Greece	Men	2003		76.5879		Observed	e0	LL	GRC
all-cause (indirect)	Greece	Men	2004		76.689		Observed	e0	LL	GRC
all-cause (indirect)	Greece	Men	2005		76.8499		Observed	e0	LL	GRC
all-cause (indirect)	Greece	Men	2006		77.1555		Observed	e0	LL	GRC
all-cause (indirect)	Greece	Men	2007		76.939		Observed	e0	LL	GRC
all-cause (indirect)	Greece	Men	2008		77.4746		Observed	e0	LL	GRC
all-cause (indirect)	Greece	Men	2009		77.4864		Observed	e0	LL	GRC
all-cause (indirect)	Greece	Men	2010		77.8727		Observed	e0	LL	GRC
all-cause (indirect)	Greece	Men	2011		77.8784		Observed	e0	LL	GRC
all-cause (indirect)	Greece	Men	2012		77.8215		Observed	e0	LL	GRC
all-cause (indirect)	Greece	Men	2013		78.4472		Observed	e0	LL	GRC
all-cause (indirect)	Greece	Men	2014		78.4575		Observed	e0	LL	GRC
all-cause (indirect)	Greece	Men	2015	78.1384	79.3172	80.4086	Projected	e0	LL	GRC
all-cause (indirect)	Greece	Men	2016	78.1484	79.5948	80.8963	Projected	e0	LL	GRC
all-cause (indirect)	Greece	Men	2017	78.2915	79.9165	81.3802	Projected	e0	LL	GRC
all-cause (indirect)	Greece	Men	2018	78.3972	80.1939	81.786	Projected	e0	LL	GRC
all-cause (indirect)	Greece	Men	2019	78.571	80.4948	82.1803	Projected	e0	LL	GRC
all-cause (indirect)	Greece	Men	2020	78.7387	80.788	82.5726	Projected	e0	LL	GRC
all-cause (indirect)	Greece	Men	2021	78.9153	81.0746	82.9292	Projected	e0	LL	GRC
all-cause (indirect)	Greece	Men	2022	79.0946	81.3615	83.2924	Projected	e0	LL	GRC
all-cause (indirect)	Greece	Men	2023	79.2906	81.6532	83.6411	Projected	e0	LL	GRC
all-cause (indirect)	Greece	Men	2024	79.484	81.9344	83.9768	Projected	e0	LL	GRC
all-cause (indirect)	Greece	Men	2025	79.6957	82.2161	84.2892	Projected	e0	LL	GRC
all-cause (indirect)	Greece	Men	2026	79.8918	82.502	84.6299	Projected	e0	LL	GRC
all-cause (indirect)	Greece	Men	2027	80.1166	82.772	84.9198	Projected	e0	LL	GRC
all-cause (indirect)	Greece	Men	2028	80.32	83.0535	85.2497	Projected	e0	LL	GRC
all-cause (indirect)	Greece	Men	2029	80.57	83.3235	85.5502	Projected	e0	LL	GRC
all-cause (indirect)	Greece	Men	2030	80.779	83.5934	85.8388	Projected	e0	LL	GRC
all-cause (indirect)	Greece	Men	2031	81.0084	83.851	86.1271	Projected	e0	LL	GRC
all-cause (indirect)	Greece	Men	2032	81.2415	84.1204	86.4062	Projected	e0	LL	GRC
all-cause (indirect)	Greece	Men	2033	81.457	84.3849	86.6918	Projected	e0	LL	GRC
all-cause (indirect)	Greece	Men	2034	81.6935	84.6405	86.9593	Projected	e0	LL	GRC
all-cause (indirect)	Greece	Men	2035	81.9191	84.904	87.2332	Projected	e0	LL	GRC
all-cause (indirect)	Greece	Men	2036	82.1397	85.1545	87.4984	Projected	e0	LL	GRC
all-cause (indirect)	Greece	Men	2037	82.3948	85.406	87.7543	Projected	e0	LL	GRC
all-cause (indirect)	Greece	Men	2038	82.6208	85.655	88.0003	Projected	e0	LL	GRC
all-cause (indirect)	Greece	Men	2039	82.8358	85.896	88.243	Projected	e0	LL	GRC
all-cause (indirect)	Greece	Men	2040	83.0537	86.1318	88.4852	Projected	e0	LL	GRC
all-cause (indirect)	Greece	Men	2041	83.2731	86.3685	88.6988	Projected	e0	LL	GRC
all-cause (indirect)	Greece	Men	2042	83.492	86.5971	88.9367	Projected	e0	LL	GRC
all-cause (indirect)	Greece	Men	2043	83.6923	86.8193	89.165	Projected	e0	LL	GRC
all-cause (indirect)	Greece	Men	2044	83.896	87.0418	89.3834	Projected	e0	LL	GRC
all-cause (indirect)	Greece	Men	2045	84.1013	87.263	89.5979	Projected	e0	LL	GRC
all-cause (indirect)	Greece	Men	2046	84.3395	87.4706	89.8082	Projected	e0	LL	GRC
all-cause (indirect)	Greece	Men	2047	84.5587	87.6841	90.0144	Projected	e0	LL	GRC
all-cause (indirect)	Greece	Men	2048	84.777	87.8974	90.2169	Projected	e0	LL	GRC
all-cause (indirect)	Greece	Men	2049	84.9719	88.1017	90.4255	Projected	e0	LL	GRC
all-cause (indirect)	Greece	Men	2050	85.1663	88.3105	90.6187	Projected	e0	LL	GRC
all-cause (indirect)	Greece	Men	2051	85.3719	88.502	90.7993	Projected	e0	LL	GRC
all-cause (indirect)	Greece	Men	2052	85.5678	88.6983	90.9766	Projected	e0	LL	GRC
all-cause (indirect)	Greece	Men	2053	85.7539	88.8838	91.1653	Projected	e0	LL	GRC
all-cause (indirect)	Greece	Men	2054	85.9541	89.0734	91.3345	Projected	e0	LL	GRC
all-cause (indirect)	Greece	Men	2055	86.1428	89.2611	91.5214	Projected	e0	LL	GRC
all-cause (indirect)	Greece	Men	2056	86.3295	89.4457	91.6904	Projected	e0	LL	GRC
all-cause (indirect)	Greece	Men	2057	86.528	89.6174	91.8533	Projected	e0	LL	GRC
all-cause (indirect)	Greece	Men	2058	86.7146	89.7944	92.0184	Projected	e0	LL	GRC
all-cause (indirect)	Greece	Men	2059	86.9216	89.97	92.1888	Projected	e0	LL	GRC
all-cause (indirect)	Greece	Men	2060	87.0894	90.144	92.3448	Projected	e0	LL	GRC
all-cause (indirect)	Greece	Men	2061	87.2657	90.3101	92.5045	Projected	e0	LL	GRC
all-cause (indirect)	Greece	Men	2062	87.4299	90.4798	92.6487	Projected	e0	LL	GRC
all-cause (indirect)	Greece	Men	2063	87.6005	90.6441	92.803	Projected	e0	LL	GRC
all-cause (indirect)	Greece	Men	2064	87.7961	90.8076	92.952	Projected	e0	LL	GRC
all-cause (indirect)	Greece	Men	2065	87.9494	90.9698	93.1008	Projected	e0	LL	GRC
all-cause (indirect)	Hungary	Men	1990		65.1422		Observed	e0	LL	HUN
all-cause (indirect)	Hungary	Men	1991		65.104		Observed	e0	LL	HUN
all-cause (indirect)	Hungary	Men	1992		64.6576		Observed	e0	LL	HUN
all-cause (indirect)	Hungary	Men	1993		64.6517		Observed	e0	LL	HUN
all-cause (indirect)	Hungary	Men	1994		65.0024		Observed	e0	LL	HUN
all-cause (indirect)	Hungary	Men	1995		65.4146		Observed	e0	LL	HUN
all-cause (indirect)	Hungary	Men	1996		66.294		Observed	e0	LL	HUN
all-cause (indirect)	Hungary	Men	1997		66.6381		Observed	e0	LL	HUN
all-cause (indirect)	Hungary	Men	1998		66.4298		Observed	e0	LL	HUN
all-cause (indirect)	Hungary	Men	1999		66.6654		Observed	e0	LL	HUN
all-cause (indirect)	Hungary	Men	2000		67.4866		Observed	e0	LL	HUN
all-cause (indirect)	Hungary	Men	2001		68.1852		Observed	e0	LL	HUN
all-cause (indirect)	Hungary	Men	2002		68.2843		Observed	e0	LL	HUN
all-cause (indirect)	Hungary	Men	2003		68.3256		Observed	e0	LL	HUN
all-cause (indirect)	Hungary	Men	2004		68.6625		Observed	e0	LL	HUN
all-cause (indirect)	Hungary	Men	2005		68.6166		Observed	e0	LL	HUN
all-cause (indirect)	Hungary	Men	2006		69.0802		Observed	e0	LL	HUN
all-cause (indirect)	Hungary	Men	2007		69.263		Observed	e0	LL	HUN
all-cause (indirect)	Hungary	Men	2008		69.8335		Observed	e0	LL	HUN
all-cause (indirect)	Hungary	Men	2009		70.1207		Observed	e0	LL	HUN
all-cause (indirect)	Hungary	Men	2010		70.5712		Observed	e0	LL	HUN
all-cause (indirect)	Hungary	Men	2011		71.1483		Observed	e0	LL	HUN
all-cause (indirect)	Hungary	Men	2012		71.5503		Observed	e0	LL	HUN
all-cause (indirect)	Hungary	Men	2013		72.1236		Observed	e0	LL	HUN
all-cause (indirect)	Hungary	Men	2014		72.2596		Observed	e0	LL	HUN
all-cause (indirect)	Hungary	Men	2015	72.1975	72.9576	73.7204	Projected	e0	LL	HUN
all-cause (indirect)	Hungary	Men	2016	72.369	73.33	74.2793	Projected	e0	LL	HUN
all-cause (indirect)	Hungary	Men	2017	72.638	73.7115	74.8035	Projected	e0	LL	HUN
all-cause (indirect)	Hungary	Men	2018	72.8898	74.1009	75.3241	Projected	e0	LL	HUN
all-cause (indirect)	Hungary	Men	2019	73.1808	74.4887	75.8337	Projected	e0	LL	HUN
all-cause (indirect)	Hungary	Men	2020	73.4477	74.8912	76.3513	Projected	e0	LL	HUN
all-cause (indirect)	Hungary	Men	2021	73.7592	75.2927	76.8612	Projected	e0	LL	HUN
all-cause (indirect)	Hungary	Men	2022	74.0748	75.7052	77.3743	Projected	e0	LL	HUN
all-cause (indirect)	Hungary	Men	2023	74.3896	76.1199	77.8747	Projected	e0	LL	HUN
all-cause (indirect)	Hungary	Men	2024	74.7303	76.5406	78.3777	Projected	e0	LL	HUN
all-cause (indirect)	Hungary	Men	2025	75.0559	76.9687	78.8892	Projected	e0	LL	HUN
all-cause (indirect)	Hungary	Men	2026	75.4005	77.41	79.3699	Projected	e0	LL	HUN
all-cause (indirect)	Hungary	Men	2027	75.7654	77.8357	79.8749	Projected	e0	LL	HUN
all-cause (indirect)	Hungary	Men	2028	76.1215	78.2826	80.3301	Projected	e0	LL	HUN
all-cause (indirect)	Hungary	Men	2029	76.4991	78.7088	80.8024	Projected	e0	LL	HUN
all-cause (indirect)	Hungary	Men	2030	76.8734	79.1409	81.2321	Projected	e0	LL	HUN
all-cause (indirect)	Hungary	Men	2031	77.2611	79.5596	81.6605	Projected	e0	LL	HUN
all-cause (indirect)	Hungary	Men	2032	77.6172	79.9771	82.0518	Projected	e0	LL	HUN
all-cause (indirect)	Hungary	Men	2033	78.0164	80.3849	82.4566	Projected	e0	LL	HUN
all-cause (indirect)	Hungary	Men	2034	78.3987	80.783	82.8537	Projected	e0	LL	HUN
all-cause (indirect)	Hungary	Men	2035	78.7863	81.1769	83.2209	Projected	e0	LL	HUN
all-cause (indirect)	Hungary	Men	2036	79.176	81.5529	83.5746	Projected	e0	LL	HUN
all-cause (indirect)	Hungary	Men	2037	79.5534	81.9209	83.9258	Projected	e0	LL	HUN
all-cause (indirect)	Hungary	Men	2038	79.9333	82.2691	84.2547	Projected	e0	LL	HUN
all-cause (indirect)	Hungary	Men	2039	80.3228	82.6141	84.5884	Projected	e0	LL	HUN
all-cause (indirect)	Hungary	Men	2040	80.6669	82.9423	84.8882	Projected	e0	LL	HUN
all-cause (indirect)	Hungary	Men	2041	81.0249	83.2566	85.196	Projected	e0	LL	HUN
all-cause (indirect)	Hungary	Men	2042	81.3448	83.5656	85.4874	Projected	e0	LL	HUN
all-cause (indirect)	Hungary	Men	2043	81.6493	83.8587	85.7623	Projected	e0	LL	HUN
all-cause (indirect)	Hungary	Men	2044	81.9297	84.1414	86.0474	Projected	e0	LL	HUN
all-cause (indirect)	Hungary	Men	2045	82.2111	84.4125	86.2988	Projected	e0	LL	HUN
all-cause (indirect)	Hungary	Men	2046	82.4892	84.6725	86.555	Projected	e0	LL	HUN
all-cause (indirect)	Hungary	Men	2047	82.742	84.92	86.7941	Projected	e0	LL	HUN
all-cause (indirect)	Hungary	Men	2048	82.9754	85.169	87.0399	Projected	e0	LL	HUN
all-cause (indirect)	Hungary	Men	2049	83.2216	85.4087	87.2678	Projected	e0	LL	HUN
all-cause (indirect)	Hungary	Men	2050	83.4632	85.6389	87.506	Projected	e0	LL	HUN
all-cause (indirect)	Hungary	Men	2051	83.6845	85.8708	87.7201	Projected	e0	LL	HUN
all-cause (indirect)	Hungary	Men	2052	83.9163	86.0872	87.9374	Projected	e0	LL	HUN
all-cause (indirect)	Hungary	Men	2053	84.1363	86.3037	88.1482	Projected	e0	LL	HUN
all-cause (indirect)	Hungary	Men	2054	84.3369	86.5193	88.3548	Projected	e0	LL	HUN
all-cause (indirect)	Hungary	Men	2055	84.5587	86.7259	88.5644	Projected	e0	LL	HUN
all-cause (indirect)	Hungary	Men	2056	84.7483	86.9347	88.7597	Projected	e0	LL	HUN
all-cause (indirect)	Hungary	Men	2057	84.9503	87.1351	88.9672	Projected	e0	LL	HUN
all-cause (indirect)	Hungary	Men	2058	85.1523	87.3358	89.1519	Projected	e0	LL	HUN
all-cause (indirect)	Hungary	Men	2059	85.3431	87.5241	89.3467	Projected	e0	LL	HUN
all-cause (indirect)	Hungary	Men	2060	85.5423	87.7168	89.5418	Projected	e0	LL	HUN
all-cause (indirect)	Hungary	Men	2061	85.731	87.9067	89.7194	Projected	e0	LL	HUN
all-cause (indirect)	Hungary	Men	2062	85.9122	88.0953	89.9075	Projected	e0	LL	HUN
all-cause (indirect)	Hungary	Men	2063	86.0929	88.2817	90.0845	Projected	e0	LL	HUN
all-cause (indirect)	Hungary	Men	2064	86.2778	88.4632	90.2659	Projected	e0	LL	HUN
all-cause (indirect)	Hungary	Men	2065	86.4676	88.6435	90.4461	Projected	e0	LL	HUN
all-cause (indirect)	Ireland	Men	1990		72.1216		Observed	e0	LL	IRL
all-cause (indirect)	Ireland	Men	1991		72.2868		Observed	e0	LL	IRL
all-cause (indirect)	Ireland	Men	1992		72.6769		Observed	e0	LL	IRL
all-cause (indirect)	Ireland	Men	1993		72.5597		Observed	e0	LL	IRL
all-cause (indirect)	Ireland	Men	1994		73.0576		Observed	e0	LL	IRL
all-cause (indirect)	Ireland	Men	1995		72.7713		Observed	e0	LL	IRL
all-cause (indirect)	Ireland	Men	1996		73.0927		Observed	e0	LL	IRL
all-cause (indirect)	Ireland	Men	1997		73.3823		Observed	e0	LL	IRL
all-cause (indirect)	Ireland	Men	1998		73.4038		Observed	e0	LL	IRL
all-cause (indirect)	Ireland	Men	1999		73.4257		Observed	e0	LL	IRL
all-cause (indirect)	Ireland	Men	2000		73.9403		Observed	e0	LL	IRL
all-cause (indirect)	Ireland	Men	2001		74.4979		Observed	e0	LL	IRL
all-cause (indirect)	Ireland	Men	2002		74.9724		Observed	e0	LL	IRL
all-cause (indirect)	Ireland	Men	2003		75.6537		Observed	e0	LL	IRL
all-cause (indirect)	Ireland	Men	2004		76.0205		Observed	e0	LL	IRL
all-cause (indirect)	Ireland	Men	2005		77.0635		Observed	e0	LL	IRL
all-cause (indirect)	Ireland	Men	2006		76.7887		Observed	e0	LL	IRL
all-cause (indirect)	Ireland	Men	2007		77.2447		Observed	e0	LL	IRL
all-cause (indirect)	Ireland	Men	2008		77.4652		Observed	e0	LL	IRL
all-cause (indirect)	Ireland	Men	2009		77.6535		Observed	e0	LL	IRL
all-cause (indirect)	Ireland	Men	2010		78.2569		Observed	e0	LL	IRL
all-cause (indirect)	Ireland	Men	2011		78.4424		Observed	e0	LL	IRL
all-cause (indirect)	Ireland	Men	2012		78.5734		Observed	e0	LL	IRL
all-cause (indirect)	Ireland	Men	2013		78.6904		Observed	e0	LL	IRL
all-cause (indirect)	Ireland	Men	2014		79.1545		Observed	e0	LL	IRL
all-cause (indirect)	Ireland	Men	2015	79.4171	80.2684	81.0651	Projected	e0	LL	IRL
all-cause (indirect)	Ireland	Men	2016	79.4764	80.5688	81.552	Projected	e0	LL	IRL
all-cause (indirect)	Ireland	Men	2017	79.6133	80.8741	81.9615	Projected	e0	LL	IRL
all-cause (indirect)	Ireland	Men	2018	79.7696	81.1759	82.3642	Projected	e0	LL	IRL
all-cause (indirect)	Ireland	Men	2019	79.9429	81.473	82.7512	Projected	e0	LL	IRL
all-cause (indirect)	Ireland	Men	2020	80.135	81.7664	83.0996	Projected	e0	LL	IRL
all-cause (indirect)	Ireland	Men	2021	80.3327	82.0497	83.4495	Projected	e0	LL	IRL
all-cause (indirect)	Ireland	Men	2022	80.5426	82.3288	83.7781	Projected	e0	LL	IRL
all-cause (indirect)	Ireland	Men	2023	80.7343	82.5955	84.0999	Projected	e0	LL	IRL
all-cause (indirect)	Ireland	Men	2024	80.927	82.8637	84.4132	Projected	e0	LL	IRL
all-cause (indirect)	Ireland	Men	2025	81.1279	83.1278	84.7134	Projected	e0	LL	IRL
all-cause (indirect)	Ireland	Men	2026	81.3445	83.3809	85.0006	Projected	e0	LL	IRL
all-cause (indirect)	Ireland	Men	2027	81.5409	83.6351	85.2889	Projected	e0	LL	IRL
all-cause (indirect)	Ireland	Men	2028	81.7427	83.8788	85.5614	Projected	e0	LL	IRL
all-cause (indirect)	Ireland	Men	2029	81.938	84.1221	85.824	Projected	e0	LL	IRL
all-cause (indirect)	Ireland	Men	2030	82.146	84.3489	86.0883	Projected	e0	LL	IRL
all-cause (indirect)	Ireland	Men	2031	82.3417	84.5824	86.3386	Projected	e0	LL	IRL
all-cause (indirect)	Ireland	Men	2032	82.5339	84.8112	86.5791	Projected	e0	LL	IRL
all-cause (indirect)	Ireland	Men	2033	82.7339	85.0332	86.8296	Projected	e0	LL	IRL
all-cause (indirect)	Ireland	Men	2034	82.9077	85.2521	87.0647	Projected	e0	LL	IRL
all-cause (indirect)	Ireland	Men	2035	83.105	85.4684	87.2928	Projected	e0	LL	IRL
all-cause (indirect)	Ireland	Men	2036	83.2967	85.6889	87.5295	Projected	e0	LL	IRL
all-cause (indirect)	Ireland	Men	2037	83.4923	85.8912	87.7416	Projected	e0	LL	IRL
all-cause (indirect)	Ireland	Men	2038	83.6942	86.1007	87.9627	Projected	e0	LL	IRL
all-cause (indirect)	Ireland	Men	2039	83.8872	86.3086	88.1787	Projected	e0	LL	IRL
all-cause (indirect)	Ireland	Men	2040	84.0825	86.5095	88.3937	Projected	e0	LL	IRL
all-cause (indirect)	Ireland	Men	2041	84.2616	86.7146	88.6052	Projected	e0	LL	IRL
all-cause (indirect)	Ireland	Men	2042	84.4616	86.9175	88.8023	Projected	e0	LL	IRL
all-cause (indirect)	Ireland	Men	2043	84.6511	87.1104	89.0006	Projected	e0	LL	IRL
all-cause (indirect)	Ireland	Men	2044	84.8487	87.3124	89.2084	Projected	e0	LL	IRL
all-cause (indirect)	Ireland	Men	2045	85.0189	87.4999	89.4087	Projected	e0	LL	IRL
all-cause (indirect)	Ireland	Men	2046	85.2037	87.6991	89.591	Projected	e0	LL	IRL
all-cause (indirect)	Ireland	Men	2047	85.3986	87.8818	89.7873	Projected	e0	LL	IRL
all-cause (indirect)	Ireland	Men	2048	85.5573	88.0707	89.9742	Projected	e0	LL	IRL
all-cause (indirect)	Ireland	Men	2049	85.7486	88.256	90.1689	Projected	e0	LL	IRL
all-cause (indirect)	Ireland	Men	2050	85.9514	88.4421	90.3523	Projected	e0	LL	IRL
all-cause (indirect)	Ireland	Men	2051	86.1307	88.6229	90.5293	Projected	e0	LL	IRL
all-cause (indirect)	Ireland	Men	2052	86.313	88.8042	90.7046	Projected	e0	LL	IRL
all-cause (indirect)	Ireland	Men	2053	86.4756	88.9887	90.8784	Projected	e0	LL	IRL
all-cause (indirect)	Ireland	Men	2054	86.6548	89.1677	91.0496	Projected	e0	LL	IRL
all-cause (indirect)	Ireland	Men	2055	86.8377	89.341	91.2204	Projected	e0	LL	IRL
all-cause (indirect)	Ireland	Men	2056	86.993	89.5133	91.3744	Projected	e0	LL	IRL
all-cause (indirect)	Ireland	Men	2057	87.1483	89.6854	91.5401	Projected	e0	LL	IRL
all-cause (indirect)	Ireland	Men	2058	87.3169	89.8473	91.6958	Projected	e0	LL	IRL
all-cause (indirect)	Ireland	Men	2059	87.4866	90.0091	91.8659	Projected	e0	LL	IRL
all-cause (indirect)	Ireland	Men	2060	87.6588	90.1749	92.0037	Projected	e0	LL	IRL
all-cause (indirect)	Ireland	Men	2061	87.811	90.3324	92.1679	Projected	e0	LL	IRL
all-cause (indirect)	Ireland	Men	2062	87.9878	90.4916	92.312	Projected	e0	LL	IRL
all-cause (indirect)	Ireland	Men	2063	88.1393	90.6444	92.457	Projected	e0	LL	IRL
all-cause (indirect)	Ireland	Men	2064	88.3121	90.7944	92.6035	Projected	e0	LL	IRL
all-cause (indirect)	Ireland	Men	2065	88.4585	90.9464	92.7428	Projected	e0	LL	IRL
all-cause (indirect)	Italy	Men	1990		73.6307		Observed	e0	LL	ITA
all-cause (indirect)	Italy	Men	1991		73.5901		Observed	e0	LL	ITA
all-cause (indirect)	Italy	Men	1992		73.9758		Observed	e0	LL	ITA
all-cause (indirect)	Italy	Men	1993		74.3611		Observed	e0	LL	ITA
all-cause (indirect)	Italy	Men	1994		74.5634		Observed	e0	LL	ITA
all-cause (indirect)	Italy	Men	1995		74.779		Observed	e0	LL	ITA
all-cause (indirect)	Italy	Men	1996		75.1847		Observed	e0	LL	ITA
all-cause (indirect)	Italy	Men	1997		75.5352		Observed	e0	LL	ITA
all-cause (indirect)	Italy	Men	1998		75.6387		Observed	e0	LL	ITA
all-cause (indirect)	Italy	Men	1999		76.0578		Observed	e0	LL	ITA
all-cause (indirect)	Italy	Men	2000		76.5319		Observed	e0	LL	ITA
all-cause (indirect)	Italy	Men	2001		76.7941		Observed	e0	LL	ITA
all-cause (indirect)	Italy	Men	2002		77.0766		Observed	e0	LL	ITA
all-cause (indirect)	Italy	Men	2003		77.3181		Observed	e0	LL	ITA
all-cause (indirect)	Italy	Men	2004		78.0606		Observed	e0	LL	ITA
all-cause (indirect)	Italy	Men	2005		78.1662		Observed	e0	LL	ITA
all-cause (indirect)	Italy	Men	2006		78.576		Observed	e0	LL	ITA
all-cause (indirect)	Italy	Men	2007		78.7651		Observed	e0	LL	ITA
all-cause (indirect)	Italy	Men	2008		78.9724		Observed	e0	LL	ITA
all-cause (indirect)	Italy	Men	2009		79.164		Observed	e0	LL	ITA
all-cause (indirect)	Italy	Men	2010		79.5579		Observed	e0	LL	ITA
all-cause (indirect)	Italy	Men	2011		79.7258		Observed	e0	LL	ITA
all-cause (indirect)	Italy	Men	2012		79.8364		Observed	e0	LL	ITA
all-cause (indirect)	Italy	Men	2013		80.2506		Observed	e0	LL	ITA
all-cause (indirect)	Italy	Men	2014		80.5518		Observed	e0	LL	ITA
all-cause (indirect)	Italy	Men	2015	80.6865	81.2621	81.8225	Projected	e0	LL	ITA
all-cause (indirect)	Italy	Men	2016	80.8679	81.5659	82.2443	Projected	e0	LL	ITA
all-cause (indirect)	Italy	Men	2017	81.1069	81.8748	82.6218	Projected	e0	LL	ITA
all-cause (indirect)	Italy	Men	2018	81.3264	82.1729	82.9741	Projected	e0	LL	ITA
all-cause (indirect)	Italy	Men	2019	81.5714	82.4653	83.331	Projected	e0	LL	ITA
all-cause (indirect)	Italy	Men	2020	81.8058	82.7523	83.6595	Projected	e0	LL	ITA
all-cause (indirect)	Italy	Men	2021	82.0469	83.0327	83.976	Projected	e0	LL	ITA
all-cause (indirect)	Italy	Men	2022	82.2814	83.3036	84.2846	Projected	e0	LL	ITA
all-cause (indirect)	Italy	Men	2023	82.5051	83.5698	84.5816	Projected	e0	LL	ITA
all-cause (indirect)	Italy	Men	2024	82.7229	83.8212	84.8694	Projected	e0	LL	ITA
all-cause (indirect)	Italy	Men	2025	82.941	84.0684	85.1466	Projected	e0	LL	ITA
all-cause (indirect)	Italy	Men	2026	83.1611	84.3165	85.4152	Projected	e0	LL	ITA
all-cause (indirect)	Italy	Men	2027	83.3752	84.5592	85.6735	Projected	e0	LL	ITA
all-cause (indirect)	Italy	Men	2028	83.5855	84.7943	85.9335	Projected	e0	LL	ITA
all-cause (indirect)	Italy	Men	2029	83.7944	85.02	86.1819	Projected	e0	LL	ITA
all-cause (indirect)	Italy	Men	2030	83.9894	85.2492	86.4309	Projected	e0	LL	ITA
all-cause (indirect)	Italy	Men	2031	84.2054	85.4655	86.6589	Projected	e0	LL	ITA
all-cause (indirect)	Italy	Men	2032	84.4027	85.6864	86.8865	Projected	e0	LL	ITA
all-cause (indirect)	Italy	Men	2033	84.6023	85.8978	87.1193	Projected	e0	LL	ITA
all-cause (indirect)	Italy	Men	2034	84.8005	86.1071	87.3333	Projected	e0	LL	ITA
all-cause (indirect)	Italy	Men	2035	85.0031	86.3142	87.5598	Projected	e0	LL	ITA
all-cause (indirect)	Italy	Men	2036	85.197	86.5219	87.7708	Projected	e0	LL	ITA
all-cause (indirect)	Italy	Men	2037	85.3679	86.7233	87.9826	Projected	e0	LL	ITA
all-cause (indirect)	Italy	Men	2038	85.567	86.9165	88.1804	Projected	e0	LL	ITA
all-cause (indirect)	Italy	Men	2039	85.7465	87.1146	88.389	Projected	e0	LL	ITA
all-cause (indirect)	Italy	Men	2040	85.9298	87.3073	88.5919	Projected	e0	LL	ITA
all-cause (indirect)	Italy	Men	2041	86.1055	87.5	88.7858	Projected	e0	LL	ITA
all-cause (indirect)	Italy	Men	2042	86.281	87.6854	88.9768	Projected	e0	LL	ITA
all-cause (indirect)	Italy	Men	2043	86.4605	87.8716	89.1702	Projected	e0	LL	ITA
all-cause (indirect)	Italy	Men	2044	86.6311	88.0555	89.3547	Projected	e0	LL	ITA
all-cause (indirect)	Italy	Men	2045	86.8018	88.2366	89.5381	Projected	e0	LL	ITA
all-cause (indirect)	Italy	Men	2046	86.9859	88.4182	89.7198	Projected	e0	LL	ITA
all-cause (indirect)	Italy	Men	2047	87.1566	88.5926	89.9052	Projected	e0	LL	ITA
all-cause (indirect)	Italy	Men	2048	87.3322	88.765	90.0763	Projected	e0	LL	ITA
all-cause (indirect)	Italy	Men	2049	87.4895	88.9413	90.2595	Projected	e0	LL	ITA
all-cause (indirect)	Italy	Men	2050	87.6646	89.1109	90.4217	Projected	e0	LL	ITA
all-cause (indirect)	Italy	Men	2051	87.818	89.2807	90.5941	Projected	e0	LL	ITA
all-cause (indirect)	Italy	Men	2052	87.9866	89.4483	90.7535	Projected	e0	LL	ITA
all-cause (indirect)	Italy	Men	2053	88.1425	89.6126	90.9316	Projected	e0	LL	ITA
all-cause (indirect)	Italy	Men	2054	88.3101	89.7754	91.0881	Projected	e0	LL	ITA
all-cause (indirect)	Italy	Men	2055	88.4744	89.9388	91.2539	Projected	e0	LL	ITA
all-cause (indirect)	Italy	Men	2056	88.6349	90.0965	91.4054	Projected	e0	LL	ITA
all-cause (indirect)	Italy	Men	2057	88.785	90.251	91.5575	Projected	e0	LL	ITA
all-cause (indirect)	Italy	Men	2058	88.9502	90.4075	91.7135	Projected	e0	LL	ITA
all-cause (indirect)	Italy	Men	2059	89.0901	90.5598	91.8678	Projected	e0	LL	ITA
all-cause (indirect)	Italy	Men	2060	89.249	90.708	92.0147	Projected	e0	LL	ITA
all-cause (indirect)	Italy	Men	2061	89.4026	90.8586	92.1532	Projected	e0	LL	ITA
all-cause (indirect)	Italy	Men	2062	89.5478	91.0028	92.296	Projected	e0	LL	ITA
all-cause (indirect)	Italy	Men	2063	89.7013	91.151	92.4321	Projected	e0	LL	ITA
all-cause (indirect)	Italy	Men	2064	89.8423	91.2887	92.5743	Projected	e0	LL	ITA
all-cause (indirect)	Italy	Men	2065	89.9888	91.4297	92.7055	Projected	e0	LL	ITA
all-cause (indirect)	Netherlands	Men	1990		73.8192		Observed	e0	LL	NLD
all-cause (indirect)	Netherlands	Men	1991		74.0425		Observed	e0	LL	NLD
all-cause (indirect)	Netherlands	Men	1992		74.3007		Observed	e0	LL	NLD
all-cause (indirect)	Netherlands	Men	1993		73.9826		Observed	e0	LL	NLD
all-cause (indirect)	Netherlands	Men	1994		74.5758		Observed	e0	LL	NLD
all-cause (indirect)	Netherlands	Men	1995		74.5963		Observed	e0	LL	NLD
all-cause (indirect)	Netherlands	Men	1996		74.649		Observed	e0	LL	NLD
all-cause (indirect)	Netherlands	Men	1997		75.1575		Observed	e0	LL	NLD
all-cause (indirect)	Netherlands	Men	1998		75.1767		Observed	e0	LL	NLD
all-cause (indirect)	Netherlands	Men	1999		75.3287		Observed	e0	LL	NLD
all-cause (indirect)	Netherlands	Men	2000		75.5307		Observed	e0	LL	NLD
all-cause (indirect)	Netherlands	Men	2001		75.8017		Observed	e0	LL	NLD
all-cause (indirect)	Netherlands	Men	2002		75.9877		Observed	e0	LL	NLD
all-cause (indirect)	Netherlands	Men	2003		76.2396		Observed	e0	LL	NLD
all-cause (indirect)	Netherlands	Men	2004		76.8678		Observed	e0	LL	NLD
all-cause (indirect)	Netherlands	Men	2005		77.1963		Observed	e0	LL	NLD
all-cause (indirect)	Netherlands	Men	2006		77.6283		Observed	e0	LL	NLD
all-cause (indirect)	Netherlands	Men	2007		78.0132		Observed	e0	LL	NLD
all-cause (indirect)	Netherlands	Men	2008		78.3142		Observed	e0	LL	NLD
all-cause (indirect)	Netherlands	Men	2009		78.5328		Observed	e0	LL	NLD
all-cause (indirect)	Netherlands	Men	2010		78.7775		Observed	e0	LL	NLD
all-cause (indirect)	Netherlands	Men	2011		79.1939		Observed	e0	LL	NLD
all-cause (indirect)	Netherlands	Men	2012		79.1457		Observed	e0	LL	NLD
all-cause (indirect)	Netherlands	Men	2013		79.4168		Observed	e0	LL	NLD
all-cause (indirect)	Netherlands	Men	2014		79.8725		Observed	e0	LL	NLD
all-cause (indirect)	Netherlands	Men	2015	79.8059	80.641	81.4643	Projected	e0	LL	NLD
all-cause (indirect)	Netherlands	Men	2016	79.7851	80.8181	81.8229	Projected	e0	LL	NLD
all-cause (indirect)	Netherlands	Men	2017	79.9449	81.1206	82.2808	Projected	e0	LL	NLD
all-cause (indirect)	Netherlands	Men	2018	80.043	81.3538	82.6254	Projected	e0	LL	NLD
all-cause (indirect)	Netherlands	Men	2019	80.2136	81.6273	83.0232	Projected	e0	LL	NLD
all-cause (indirect)	Netherlands	Men	2020	80.3591	81.8907	83.3725	Projected	e0	LL	NLD
all-cause (indirect)	Netherlands	Men	2021	80.5331	82.1519	83.7286	Projected	e0	LL	NLD
all-cause (indirect)	Netherlands	Men	2022	80.7026	82.4126	84.0662	Projected	e0	LL	NLD
all-cause (indirect)	Netherlands	Men	2023	80.8932	82.6647	84.3912	Projected	e0	LL	NLD
all-cause (indirect)	Netherlands	Men	2024	81.0656	82.9164	84.7052	Projected	e0	LL	NLD
all-cause (indirect)	Netherlands	Men	2025	81.2381	83.1589	85.0151	Projected	e0	LL	NLD
all-cause (indirect)	Netherlands	Men	2026	81.4244	83.4099	85.3053	Projected	e0	LL	NLD
all-cause (indirect)	Netherlands	Men	2027	81.6048	83.654	85.6045	Projected	e0	LL	NLD
all-cause (indirect)	Netherlands	Men	2028	81.7916	83.8947	85.8764	Projected	e0	LL	NLD
all-cause (indirect)	Netherlands	Men	2029	81.9815	84.1351	86.1674	Projected	e0	LL	NLD
all-cause (indirect)	Netherlands	Men	2030	82.1623	84.3676	86.4482	Projected	e0	LL	NLD
all-cause (indirect)	Netherlands	Men	2031	82.3437	84.6011	86.7234	Projected	e0	LL	NLD
all-cause (indirect)	Netherlands	Men	2032	82.5434	84.8329	86.9862	Projected	e0	LL	NLD
all-cause (indirect)	Netherlands	Men	2033	82.7372	85.0701	87.2423	Projected	e0	LL	NLD
all-cause (indirect)	Netherlands	Men	2034	82.925	85.2907	87.5011	Projected	e0	LL	NLD
all-cause (indirect)	Netherlands	Men	2035	83.1294	85.5159	87.7719	Projected	e0	LL	NLD
all-cause (indirect)	Netherlands	Men	2036	83.3091	85.7431	88.0364	Projected	e0	LL	NLD
all-cause (indirect)	Netherlands	Men	2037	83.5013	85.9589	88.2756	Projected	e0	LL	NLD
all-cause (indirect)	Netherlands	Men	2038	83.6963	86.1811	88.5088	Projected	e0	LL	NLD
all-cause (indirect)	Netherlands	Men	2039	83.861	86.4047	88.7687	Projected	e0	LL	NLD
all-cause (indirect)	Netherlands	Men	2040	84.073	86.6219	88.9885	Projected	e0	LL	NLD
all-cause (indirect)	Netherlands	Men	2041	84.2534	86.8368	89.2234	Projected	e0	LL	NLD
all-cause (indirect)	Netherlands	Men	2042	84.4362	87.0447	89.4611	Projected	e0	LL	NLD
all-cause (indirect)	Netherlands	Men	2043	84.6216	87.2565	89.6859	Projected	e0	LL	NLD
all-cause (indirect)	Netherlands	Men	2044	84.8105	87.4612	89.9165	Projected	e0	LL	NLD
all-cause (indirect)	Netherlands	Men	2045	85.0244	87.6633	90.1245	Projected	e0	LL	NLD
all-cause (indirect)	Netherlands	Men	2046	85.1808	87.8678	90.3484	Projected	e0	LL	NLD
all-cause (indirect)	Netherlands	Men	2047	85.3767	88.0614	90.5715	Projected	e0	LL	NLD
all-cause (indirect)	Netherlands	Men	2048	85.5675	88.2591	90.768	Projected	e0	LL	NLD
all-cause (indirect)	Netherlands	Men	2049	85.7403	88.4499	90.9668	Projected	e0	LL	NLD
all-cause (indirect)	Netherlands	Men	2050	85.9201	88.6396	91.1757	Projected	e0	LL	NLD
all-cause (indirect)	Netherlands	Men	2051	86.0954	88.8248	91.3697	Projected	e0	LL	NLD
all-cause (indirect)	Netherlands	Men	2052	86.2653	89.0083	91.5622	Projected	e0	LL	NLD
all-cause (indirect)	Netherlands	Men	2053	86.4361	89.1877	91.7465	Projected	e0	LL	NLD
all-cause (indirect)	Netherlands	Men	2054	86.6115	89.3638	91.9192	Projected	e0	LL	NLD
all-cause (indirect)	Netherlands	Men	2055	86.7774	89.5409	92.1126	Projected	e0	LL	NLD
all-cause (indirect)	Netherlands	Men	2056	86.9311	89.7097	92.2803	Projected	e0	LL	NLD
all-cause (indirect)	Netherlands	Men	2057	87.0942	89.8805	92.4574	Projected	e0	LL	NLD
all-cause (indirect)	Netherlands	Men	2058	87.252	90.0428	92.6241	Projected	e0	LL	NLD
all-cause (indirect)	Netherlands	Men	2059	87.414	90.2064	92.7923	Projected	e0	LL	NLD
all-cause (indirect)	Netherlands	Men	2060	87.5828	90.361	92.9493	Projected	e0	LL	NLD
all-cause (indirect)	Netherlands	Men	2061	87.705	90.5166	93.1086	Projected	e0	LL	NLD
all-cause (indirect)	Netherlands	Men	2062	87.8628	90.6719	93.2659	Projected	e0	LL	NLD
all-cause (indirect)	Netherlands	Men	2063	88.0035	90.8181	93.4188	Projected	e0	LL	NLD
all-cause (indirect)	Netherlands	Men	2064	88.1446	90.9617	93.5741	Projected	e0	LL	NLD
all-cause (indirect)	Netherlands	Men	2065	88.2786	91.1127	93.7273	Projected	e0	LL	NLD
all-cause (indirect)	Norway	Men	1990		73.4447		Observed	e0	LL	NOR
all-cause (indirect)	Norway	Men	1991		74.0208		Observed	e0	LL	NOR
all-cause (indirect)	Norway	Men	1992		74.1667		Observed	e0	LL	NOR
all-cause (indirect)	Norway	Men	1993		74.2362		Observed	e0	LL	NOR
all-cause (indirect)	Norway	Men	1994		74.89		Observed	e0	LL	NOR
all-cause (indirect)	Norway	Men	1995		74.7972		Observed	e0	LL	NOR
all-cause (indirect)	Norway	Men	1996		75.3649		Observed	e0	LL	NOR
all-cause (indirect)	Norway	Men	1997		75.4582		Observed	e0	LL	NOR
all-cause (indirect)	Norway	Men	1998		75.5282		Observed	e0	LL	NOR
all-cause (indirect)	Norway	Men	1999		75.6099		Observed	e0	LL	NOR
all-cause (indirect)	Norway	Men	2000		75.9528		Observed	e0	LL	NOR
all-cause (indirect)	Norway	Men	2001		76.201		Observed	e0	LL	NOR
all-cause (indirect)	Norway	Men	2002		76.3986		Observed	e0	LL	NOR
all-cause (indirect)	Norway	Men	2003		77.0376		Observed	e0	LL	NOR
all-cause (indirect)	Norway	Men	2004		77.5001		Observed	e0	LL	NOR
all-cause (indirect)	Norway	Men	2005		77.7208		Observed	e0	LL	NOR
all-cause (indirect)	Norway	Men	2006		78.1196		Observed	e0	LL	NOR
all-cause (indirect)	Norway	Men	2007		78.2337		Observed	e0	LL	NOR
all-cause (indirect)	Norway	Men	2008		78.3135		Observed	e0	LL	NOR
all-cause (indirect)	Norway	Men	2009		78.5922		Observed	e0	LL	NOR
all-cause (indirect)	Norway	Men	2010		78.8491		Observed	e0	LL	NOR
all-cause (indirect)	Norway	Men	2011		78.9958		Observed	e0	LL	NOR
all-cause (indirect)	Norway	Men	2012		79.4133		Observed	e0	LL	NOR
all-cause (indirect)	Norway	Men	2013		79.65		Observed	e0	LL	NOR
all-cause (indirect)	Norway	Men	2014		80.0269		Observed	e0	LL	NOR
all-cause (indirect)	Norway	Men	2015	80.2982	80.8389	81.3594	Projected	e0	LL	NOR
all-cause (indirect)	Norway	Men	2016	80.5834	81.2093	81.8116	Projected	e0	LL	NOR
all-cause (indirect)	Norway	Men	2017	80.7075	81.4028	82.0625	Projected	e0	LL	NOR
all-cause (indirect)	Norway	Men	2018	80.9837	81.7175	82.4201	Projected	e0	LL	NOR
all-cause (indirect)	Norway	Men	2019	81.1449	81.9419	82.6925	Projected	e0	LL	NOR
all-cause (indirect)	Norway	Men	2020	81.4018	82.2235	83.0022	Projected	e0	LL	NOR
all-cause (indirect)	Norway	Men	2021	81.5831	82.4608	83.2844	Projected	e0	LL	NOR
all-cause (indirect)	Norway	Men	2022	81.8192	82.7188	83.5574	Projected	e0	LL	NOR
all-cause (indirect)	Norway	Men	2023	82.0238	82.9561	83.8218	Projected	e0	LL	NOR
all-cause (indirect)	Norway	Men	2024	82.2369	83.2031	84.0957	Projected	e0	LL	NOR
all-cause (indirect)	Norway	Men	2025	82.4529	83.4299	84.3456	Projected	e0	LL	NOR
all-cause (indirect)	Norway	Men	2026	82.6752	83.6684	84.607	Projected	e0	LL	NOR
all-cause (indirect)	Norway	Men	2027	82.8748	83.8945	84.8401	Projected	e0	LL	NOR
all-cause (indirect)	Norway	Men	2028	83.0859	84.1219	85.0968	Projected	e0	LL	NOR
all-cause (indirect)	Norway	Men	2029	83.2944	84.3408	85.3288	Projected	e0	LL	NOR
all-cause (indirect)	Norway	Men	2030	83.4848	84.5629	85.5684	Projected	e0	LL	NOR
all-cause (indirect)	Norway	Men	2031	83.6951	84.7781	85.7939	Projected	e0	LL	NOR
all-cause (indirect)	Norway	Men	2032	83.8908	84.9927	86.0145	Projected	e0	LL	NOR
all-cause (indirect)	Norway	Men	2033	84.0882	85.2071	86.2367	Projected	e0	LL	NOR
all-cause (indirect)	Norway	Men	2034	84.2898	85.4096	86.4616	Projected	e0	LL	NOR
all-cause (indirect)	Norway	Men	2035	84.4754	85.6162	86.6707	Projected	e0	LL	NOR
all-cause (indirect)	Norway	Men	2036	84.6762	85.8195	86.8804	Projected	e0	LL	NOR
all-cause (indirect)	Norway	Men	2037	84.8622	86.0226	87.0943	Projected	e0	LL	NOR
all-cause (indirect)	Norway	Men	2038	85.0639	86.2221	87.3018	Projected	e0	LL	NOR
all-cause (indirect)	Norway	Men	2039	85.2425	86.4207	87.5006	Projected	e0	LL	NOR
all-cause (indirect)	Norway	Men	2040	85.4322	86.614	87.7068	Projected	e0	LL	NOR
all-cause (indirect)	Norway	Men	2041	85.604	86.8082	87.9026	Projected	e0	LL	NOR
all-cause (indirect)	Norway	Men	2042	85.8061	86.9974	88.1026	Projected	e0	LL	NOR
all-cause (indirect)	Norway	Men	2043	85.9864	87.1877	88.2933	Projected	e0	LL	NOR
all-cause (indirect)	Norway	Men	2044	86.1612	87.3766	88.4836	Projected	e0	LL	NOR
all-cause (indirect)	Norway	Men	2045	86.3457	87.5613	88.6726	Projected	e0	LL	NOR
all-cause (indirect)	Norway	Men	2046	86.5306	87.7474	88.8674	Projected	e0	LL	NOR
all-cause (indirect)	Norway	Men	2047	86.706	87.9276	89.0496	Projected	e0	LL	NOR
all-cause (indirect)	Norway	Men	2048	86.8776	88.1055	89.2359	Projected	e0	LL	NOR
all-cause (indirect)	Norway	Men	2049	87.0575	88.286	89.4155	Projected	e0	LL	NOR
all-cause (indirect)	Norway	Men	2050	87.2312	88.4606	89.5945	Projected	e0	LL	NOR
all-cause (indirect)	Norway	Men	2051	87.4025	88.6337	89.7692	Projected	e0	LL	NOR
all-cause (indirect)	Norway	Men	2052	87.5727	88.8082	89.9479	Projected	e0	LL	NOR
all-cause (indirect)	Norway	Men	2053	87.7533	88.979	90.1031	Projected	e0	LL	NOR
all-cause (indirect)	Norway	Men	2054	87.9111	89.1491	90.2831	Projected	e0	LL	NOR
all-cause (indirect)	Norway	Men	2055	88.0868	89.3171	90.4424	Projected	e0	LL	NOR
all-cause (indirect)	Norway	Men	2056	88.2519	89.4803	90.6152	Projected	e0	LL	NOR
all-cause (indirect)	Norway	Men	2057	88.3939	89.6422	90.7721	Projected	e0	LL	NOR
all-cause (indirect)	Norway	Men	2058	88.5707	89.8016	90.9391	Projected	e0	LL	NOR
all-cause (indirect)	Norway	Men	2059	88.7257	89.9648	91.0943	Projected	e0	LL	NOR
all-cause (indirect)	Norway	Men	2060	88.8881	90.1163	91.2515	Projected	e0	LL	NOR
all-cause (indirect)	Norway	Men	2061	89.0358	90.2724	91.4059	Projected	e0	LL	NOR
all-cause (indirect)	Norway	Men	2062	89.1986	90.4223	91.5559	Projected	e0	LL	NOR
all-cause (indirect)	Norway	Men	2063	89.3407	90.5733	91.7057	Projected	e0	LL	NOR
all-cause (indirect)	Norway	Men	2064	89.4977	90.7208	91.8549	Projected	e0	LL	NOR
all-cause (indirect)	Norway	Men	2065	89.6461	90.8698	92.0005	Projected	e0	LL	NOR
all-cause (indirect)	Poland	Men	1990		66.2504		Observed	e0	LL	POL
all-cause (indirect)	Poland	Men	1991		65.8704		Observed	e0	LL	POL
all-cause (indirect)	Poland	Men	1992		66.4518		Observed	e0	LL	POL
all-cause (indirect)	Poland	Men	1993		67.1178		Observed	e0	LL	POL
all-cause (indirect)	Poland	Men	1994		67.4314		Observed	e0	LL	POL
all-cause (indirect)	Poland	Men	1995		67.5546		Observed	e0	LL	POL
all-cause (indirect)	Poland	Men	1996		68.001		Observed	e0	LL	POL
all-cause (indirect)	Poland	Men	1997		68.3015		Observed	e0	LL	POL
all-cause (indirect)	Poland	Men	1998		68.6638		Observed	e0	LL	POL
all-cause (indirect)	Poland	Men	1999		68.6315		Observed	e0	LL	POL
all-cause (indirect)	Poland	Men	2000		69.5258		Observed	e0	LL	POL
all-cause (indirect)	Poland	Men	2001		70.0544		Observed	e0	LL	POL
all-cause (indirect)	Poland	Men	2002		70.3746		Observed	e0	LL	POL
all-cause (indirect)	Poland	Men	2003		70.5702		Observed	e0	LL	POL
all-cause (indirect)	Poland	Men	2004		70.7161		Observed	e0	LL	POL
all-cause (indirect)	Poland	Men	2005		70.8508		Observed	e0	LL	POL
all-cause (indirect)	Poland	Men	2006		71.0064		Observed	e0	LL	POL
all-cause (indirect)	Poland	Men	2007		71.0357		Observed	e0	LL	POL
all-cause (indirect)	Poland	Men	2008		71.3249		Observed	e0	LL	POL
all-cause (indirect)	Poland	Men	2009		71.6053		Observed	e0	LL	POL
all-cause (indirect)	Poland	Men	2010		72.1548		Observed	e0	LL	POL
all-cause (indirect)	Poland	Men	2011		72.5124		Observed	e0	LL	POL
all-cause (indirect)	Poland	Men	2012		72.6215		Observed	e0	LL	POL
all-cause (indirect)	Poland	Men	2013		72.9794		Observed	e0	LL	POL
all-cause (indirect)	Poland	Men	2014		73.6577		Observed	e0	LL	POL
all-cause (indirect)	Poland	Men	2015	73.8283	74.7122	75.566	Projected	e0	LL	POL
all-cause (indirect)	Poland	Men	2016	74.1027	75.2039	76.2426	Projected	e0	LL	POL
all-cause (indirect)	Poland	Men	2017	74.4753	75.6943	76.8354	Projected	e0	LL	POL
all-cause (indirect)	Poland	Men	2018	74.8193	76.1672	77.4208	Projected	e0	LL	POL
all-cause (indirect)	Poland	Men	2019	75.1917	76.6336	77.9633	Projected	e0	LL	POL
all-cause (indirect)	Poland	Men	2020	75.5502	77.0915	78.4853	Projected	e0	LL	POL
all-cause (indirect)	Poland	Men	2021	75.9137	77.5265	78.9697	Projected	e0	LL	POL
all-cause (indirect)	Poland	Men	2022	76.2786	77.9578	79.4515	Projected	e0	LL	POL
all-cause (indirect)	Poland	Men	2023	76.6063	78.3616	79.901	Projected	e0	LL	POL
all-cause (indirect)	Poland	Men	2024	76.9591	78.7519	80.3232	Projected	e0	LL	POL
all-cause (indirect)	Poland	Men	2025	77.2851	79.1388	80.7481	Projected	e0	LL	POL
all-cause (indirect)	Poland	Men	2026	77.6307	79.5133	81.1295	Projected	e0	LL	POL
all-cause (indirect)	Poland	Men	2027	77.9487	79.8726	81.5242	Projected	e0	LL	POL
all-cause (indirect)	Poland	Men	2028	78.268	80.2184	81.8804	Projected	e0	LL	POL
all-cause (indirect)	Poland	Men	2029	78.5886	80.5522	82.2462	Projected	e0	LL	POL
all-cause (indirect)	Poland	Men	2030	78.8819	80.8932	82.5959	Projected	e0	LL	POL
all-cause (indirect)	Poland	Men	2031	79.1862	81.2191	82.9345	Projected	e0	LL	POL
all-cause (indirect)	Poland	Men	2032	79.4839	81.5303	83.2578	Projected	e0	LL	POL
all-cause (indirect)	Poland	Men	2033	79.7774	81.8493	83.5685	Projected	e0	LL	POL
all-cause (indirect)	Poland	Men	2034	80.0669	82.1464	83.8841	Projected	e0	LL	POL
all-cause (indirect)	Poland	Men	2035	80.3152	82.4459	84.1791	Projected	e0	LL	POL
all-cause (indirect)	Poland	Men	2036	80.6039	82.7295	84.476	Projected	e0	LL	POL
all-cause (indirect)	Poland	Men	2037	80.87	83.0153	84.7556	Projected	e0	LL	POL
all-cause (indirect)	Poland	Men	2038	81.1421	83.2934	85.0398	Projected	e0	LL	POL
all-cause (indirect)	Poland	Men	2039	81.3847	83.5713	85.2988	Projected	e0	LL	POL
all-cause (indirect)	Poland	Men	2040	81.6631	83.8364	85.5726	Projected	e0	LL	POL
all-cause (indirect)	Poland	Men	2041	81.9182	84.1018	85.8257	Projected	e0	LL	POL
all-cause (indirect)	Poland	Men	2042	82.193	84.3612	86.0709	Projected	e0	LL	POL
all-cause (indirect)	Poland	Men	2043	82.448	84.6115	86.3281	Projected	e0	LL	POL
all-cause (indirect)	Poland	Men	2044	82.7092	84.8673	86.5709	Projected	e0	LL	POL
all-cause (indirect)	Poland	Men	2045	82.9623	85.1139	86.8006	Projected	e0	LL	POL
all-cause (indirect)	Poland	Men	2046	83.2239	85.353	87.0389	Projected	e0	LL	POL
all-cause (indirect)	Poland	Men	2047	83.4689	85.5938	87.2745	Projected	e0	LL	POL
all-cause (indirect)	Poland	Men	2048	83.7074	85.8295	87.504	Projected	e0	LL	POL
all-cause (indirect)	Poland	Men	2049	83.9673	86.0621	87.7246	Projected	e0	LL	POL
all-cause (indirect)	Poland	Men	2050	84.2059	86.291	87.9409	Projected	e0	LL	POL
all-cause (indirect)	Poland	Men	2051	84.4498	86.5192	88.1578	Projected	e0	LL	POL
all-cause (indirect)	Poland	Men	2052	84.6848	86.7414	88.3698	Projected	e0	LL	POL
all-cause (indirect)	Poland	Men	2053	84.9194	86.9561	88.5764	Projected	e0	LL	POL
all-cause (indirect)	Poland	Men	2054	85.1459	87.176	88.7795	Projected	e0	LL	POL
all-cause (indirect)	Poland	Men	2055	85.3954	87.391	88.9713	Projected	e0	LL	POL
all-cause (indirect)	Poland	Men	2056	85.6254	87.6037	89.1717	Projected	e0	LL	POL
all-cause (indirect)	Poland	Men	2057	85.8619	87.8142	89.371	Projected	e0	LL	POL
all-cause (indirect)	Poland	Men	2058	86.0707	88.0153	89.5561	Projected	e0	LL	POL
all-cause (indirect)	Poland	Men	2059	86.2963	88.216	89.7503	Projected	e0	LL	POL
all-cause (indirect)	Poland	Men	2060	86.5097	88.4184	89.9297	Projected	e0	LL	POL
all-cause (indirect)	Poland	Men	2061	86.7257	88.6128	90.1251	Projected	e0	LL	POL
all-cause (indirect)	Poland	Men	2062	86.9443	88.8107	90.3031	Projected	e0	LL	POL
all-cause (indirect)	Poland	Men	2063	87.1588	88.9992	90.4854	Projected	e0	LL	POL
all-cause (indirect)	Poland	Men	2064	87.3672	89.1862	90.656	Projected	e0	LL	POL
all-cause (indirect)	Poland	Men	2065	87.5688	89.3701	90.8401	Projected	e0	LL	POL
all-cause (indirect)	Slovenia	Men	1990		69.7674		Observed	e0	LL	SVN
all-cause (indirect)	Slovenia	Men	1991		69.4271		Observed	e0	LL	SVN
all-cause (indirect)	Slovenia	Men	1992		69.5649		Observed	e0	LL	SVN
all-cause (indirect)	Slovenia	Men	1993		69.3355		Observed	e0	LL	SVN
all-cause (indirect)	Slovenia	Men	1994		69.9979		Observed	e0	LL	SVN
all-cause (indirect)	Slovenia	Men	1995		70.7226		Observed	e0	LL	SVN
all-cause (indirect)	Slovenia	Men	1996		71.1644		Observed	e0	LL	SVN
all-cause (indirect)	Slovenia	Men	1997		71.0654		Observed	e0	LL	SVN
all-cause (indirect)	Slovenia	Men	1998		71.212		Observed	e0	LL	SVN
all-cause (indirect)	Slovenia	Men	1999		71.7231		Observed	e0	LL	SVN
all-cause (indirect)	Slovenia	Men	2000		72.1668		Observed	e0	LL	SVN
all-cause (indirect)	Slovenia	Men	2001		72.2537		Observed	e0	LL	SVN
all-cause (indirect)	Slovenia	Men	2002		72.5691		Observed	e0	LL	SVN
all-cause (indirect)	Slovenia	Men	2003		72.5226		Observed	e0	LL	SVN
all-cause (indirect)	Slovenia	Men	2004		73.5192		Observed	e0	LL	SVN
all-cause (indirect)	Slovenia	Men	2005		73.952		Observed	e0	LL	SVN
all-cause (indirect)	Slovenia	Men	2006		74.3959		Observed	e0	LL	SVN
all-cause (indirect)	Slovenia	Men	2007		74.5984		Observed	e0	LL	SVN
all-cause (indirect)	Slovenia	Men	2008		75.4146		Observed	e0	LL	SVN
all-cause (indirect)	Slovenia	Men	2009		75.7516		Observed	e0	LL	SVN
all-cause (indirect)	Slovenia	Men	2010		76.2779		Observed	e0	LL	SVN
all-cause (indirect)	Slovenia	Men	2011		76.6127		Observed	e0	LL	SVN
all-cause (indirect)	Slovenia	Men	2012		76.9561		Observed	e0	LL	SVN
all-cause (indirect)	Slovenia	Men	2013		76.9857		Observed	e0	LL	SVN
all-cause (indirect)	Slovenia	Men	2014		77.9646		Observed	e0	LL	SVN
all-cause (indirect)	Slovenia	Men	2015	77.4033	78.5156	79.5139	Projected	e0	LL	SVN
all-cause (indirect)	Slovenia	Men	2016	77.5099	78.878	80.0828	Projected	e0	LL	SVN
all-cause (indirect)	Slovenia	Men	2017	77.6737	79.2364	80.5818	Projected	e0	LL	SVN
all-cause (indirect)	Slovenia	Men	2018	77.8726	79.584	81.021	Projected	e0	LL	SVN
all-cause (indirect)	Slovenia	Men	2019	78.071	79.9186	81.4519	Projected	e0	LL	SVN
all-cause (indirect)	Slovenia	Men	2020	78.2819	80.2544	81.8444	Projected	e0	LL	SVN
all-cause (indirect)	Slovenia	Men	2021	78.4826	80.5764	82.2085	Projected	e0	LL	SVN
all-cause (indirect)	Slovenia	Men	2022	78.7264	80.8899	82.5607	Projected	e0	LL	SVN
all-cause (indirect)	Slovenia	Men	2023	78.9542	81.1958	82.9133	Projected	e0	LL	SVN
all-cause (indirect)	Slovenia	Men	2024	79.1886	81.4858	83.2442	Projected	e0	LL	SVN
all-cause (indirect)	Slovenia	Men	2025	79.4247	81.7773	83.5666	Projected	e0	LL	SVN
all-cause (indirect)	Slovenia	Men	2026	79.6808	82.0597	83.8663	Projected	e0	LL	SVN
all-cause (indirect)	Slovenia	Men	2027	79.8996	82.3348	84.1501	Projected	e0	LL	SVN
all-cause (indirect)	Slovenia	Men	2028	80.107	82.598	84.4233	Projected	e0	LL	SVN
all-cause (indirect)	Slovenia	Men	2029	80.33	82.8596	84.6932	Projected	e0	LL	SVN
all-cause (indirect)	Slovenia	Men	2030	80.5485	83.1163	84.9601	Projected	e0	LL	SVN
all-cause (indirect)	Slovenia	Men	2031	80.76	83.3722	85.2148	Projected	e0	LL	SVN
all-cause (indirect)	Slovenia	Men	2032	81.0028	83.6147	85.4493	Projected	e0	LL	SVN
all-cause (indirect)	Slovenia	Men	2033	81.211	83.856	85.6968	Projected	e0	LL	SVN
all-cause (indirect)	Slovenia	Men	2034	81.3985	84.0894	85.9172	Projected	e0	LL	SVN
all-cause (indirect)	Slovenia	Men	2035	81.6266	84.3251	86.156	Projected	e0	LL	SVN
all-cause (indirect)	Slovenia	Men	2036	81.8583	84.5477	86.3792	Projected	e0	LL	SVN
all-cause (indirect)	Slovenia	Men	2037	82.0453	84.7688	86.5953	Projected	e0	LL	SVN
all-cause (indirect)	Slovenia	Men	2038	82.248	84.9908	86.7937	Projected	e0	LL	SVN
all-cause (indirect)	Slovenia	Men	2039	82.4675	85.2017	86.9984	Projected	e0	LL	SVN
all-cause (indirect)	Slovenia	Men	2040	82.6454	85.4125	87.192	Projected	e0	LL	SVN
all-cause (indirect)	Slovenia	Men	2041	82.8585	85.6183	87.3902	Projected	e0	LL	SVN
all-cause (indirect)	Slovenia	Men	2042	83.0552	85.8313	87.5904	Projected	e0	LL	SVN
all-cause (indirect)	Slovenia	Men	2043	83.2527	86.0336	87.7823	Projected	e0	LL	SVN
all-cause (indirect)	Slovenia	Men	2044	83.4403	86.2369	87.9738	Projected	e0	LL	SVN
all-cause (indirect)	Slovenia	Men	2045	83.6365	86.4302	88.1558	Projected	e0	LL	SVN
all-cause (indirect)	Slovenia	Men	2046	83.8381	86.6288	88.332	Projected	e0	LL	SVN
all-cause (indirect)	Slovenia	Men	2047	84.0218	86.8182	88.511	Projected	e0	LL	SVN
all-cause (indirect)	Slovenia	Men	2048	84.207	87.0132	88.6818	Projected	e0	LL	SVN
all-cause (indirect)	Slovenia	Men	2049	84.3852	87.2007	88.8596	Projected	e0	LL	SVN
all-cause (indirect)	Slovenia	Men	2050	84.5975	87.3829	89.025	Projected	e0	LL	SVN
all-cause (indirect)	Slovenia	Men	2051	84.7779	87.5663	89.1907	Projected	e0	LL	SVN
all-cause (indirect)	Slovenia	Men	2052	84.9681	87.7494	89.3466	Projected	e0	LL	SVN
all-cause (indirect)	Slovenia	Men	2053	85.1632	87.9281	89.5126	Projected	e0	LL	SVN
all-cause (indirect)	Slovenia	Men	2054	85.3383	88.1058	89.6682	Projected	e0	LL	SVN
all-cause (indirect)	Slovenia	Men	2055	85.5352	88.2804	89.8302	Projected	e0	LL	SVN
all-cause (indirect)	Slovenia	Men	2056	85.6944	88.4535	89.9816	Projected	e0	LL	SVN
all-cause (indirect)	Slovenia	Men	2057	85.8673	88.6222	90.135	Projected	e0	LL	SVN
all-cause (indirect)	Slovenia	Men	2058	86.0583	88.7911	90.2794	Projected	e0	LL	SVN
all-cause (indirect)	Slovenia	Men	2059	86.2322	88.9598	90.4356	Projected	e0	LL	SVN
all-cause (indirect)	Slovenia	Men	2060	86.4213	89.1259	90.577	Projected	e0	LL	SVN
all-cause (indirect)	Slovenia	Men	2061	86.61	89.2846	90.7208	Projected	e0	LL	SVN
all-cause (indirect)	Slovenia	Men	2062	86.782	89.4448	90.8678	Projected	e0	LL	SVN
all-cause (indirect)	Slovenia	Men	2063	86.9545	89.6011	91.0027	Projected	e0	LL	SVN
all-cause (indirect)	Slovenia	Men	2064	87.109	89.7584	91.1356	Projected	e0	LL	SVN
all-cause (indirect)	Slovenia	Men	2065	87.2868	89.9105	91.2732	Projected	e0	LL	SVN
all-cause (indirect)	Sweden	Men	1990		74.8088		Observed	e0	LL	SWE
all-cause (indirect)	Sweden	Men	1991		74.9417		Observed	e0	LL	SWE
all-cause (indirect)	Sweden	Men	1992		75.3584		Observed	e0	LL	SWE
all-cause (indirect)	Sweden	Men	1993		75.4895		Observed	e0	LL	SWE
all-cause (indirect)	Sweden	Men	1994		76.0738		Observed	e0	LL	SWE
all-cause (indirect)	Sweden	Men	1995		76.1742		Observed	e0	LL	SWE
all-cause (indirect)	Sweden	Men	1996		76.5134		Observed	e0	LL	SWE
all-cause (indirect)	Sweden	Men	1997		76.6994		Observed	e0	LL	SWE
all-cause (indirect)	Sweden	Men	1998		76.8681		Observed	e0	LL	SWE
all-cause (indirect)	Sweden	Men	1999		77.0674		Observed	e0	LL	SWE
all-cause (indirect)	Sweden	Men	2000		77.3736		Observed	e0	LL	SWE
all-cause (indirect)	Sweden	Men	2001		77.538		Observed	e0	LL	SWE
all-cause (indirect)	Sweden	Men	2002		77.7103		Observed	e0	LL	SWE
all-cause (indirect)	Sweden	Men	2003		77.901		Observed	e0	LL	SWE
all-cause (indirect)	Sweden	Men	2004		78.3492		Observed	e0	LL	SWE
all-cause (indirect)	Sweden	Men	2005		78.4238		Observed	e0	LL	SWE
all-cause (indirect)	Sweden	Men	2006		78.6918		Observed	e0	LL	SWE
all-cause (indirect)	Sweden	Men	2007		78.9236		Observed	e0	LL	SWE
all-cause (indirect)	Sweden	Men	2008		79.0923		Observed	e0	LL	SWE
all-cause (indirect)	Sweden	Men	2009		79.3336		Observed	e0	LL	SWE
all-cause (indirect)	Sweden	Men	2010		79.516		Observed	e0	LL	SWE
all-cause (indirect)	Sweden	Men	2011		79.7951		Observed	e0	LL	SWE
all-cause (indirect)	Sweden	Men	2012		79.8657		Observed	e0	LL	SWE
all-cause (indirect)	Sweden	Men	2013		80.1003		Observed	e0	LL	SWE
all-cause (indirect)	Sweden	Men	2014		80.35		Observed	e0	LL	SWE
all-cause (indirect)	Sweden	Men	2015	80.4603	81.0507	81.6034	Projected	e0	LL	SWE
all-cause (indirect)	Sweden	Men	2016	80.561	81.2832	81.9447	Projected	e0	LL	SWE
all-cause (indirect)	Sweden	Men	2017	80.8886	81.6844	82.4106	Projected	e0	LL	SWE
all-cause (indirect)	Sweden	Men	2018	81.0392	81.9079	82.6937	Projected	e0	LL	SWE
all-cause (indirect)	Sweden	Men	2019	81.1943	82.1408	82.9869	Projected	e0	LL	SWE
all-cause (indirect)	Sweden	Men	2020	81.3826	82.3715	83.261	Projected	e0	LL	SWE
all-cause (indirect)	Sweden	Men	2021	81.552	82.6029	83.5374	Projected	e0	LL	SWE
all-cause (indirect)	Sweden	Men	2022	81.7347	82.8286	83.806	Projected	e0	LL	SWE
all-cause (indirect)	Sweden	Men	2023	81.9083	83.0559	84.06	Projected	e0	LL	SWE
all-cause (indirect)	Sweden	Men	2024	82.082	83.2783	84.3189	Projected	e0	LL	SWE
all-cause (indirect)	Sweden	Men	2025	82.2782	83.5021	84.5678	Projected	e0	LL	SWE
all-cause (indirect)	Sweden	Men	2026	82.4708	83.7208	84.8189	Projected	e0	LL	SWE
all-cause (indirect)	Sweden	Men	2027	82.6482	83.9383	85.0522	Projected	e0	LL	SWE
all-cause (indirect)	Sweden	Men	2028	82.8354	84.1528	85.2895	Projected	e0	LL	SWE
all-cause (indirect)	Sweden	Men	2029	83.029	84.3623	85.5211	Projected	e0	LL	SWE
all-cause (indirect)	Sweden	Men	2030	83.1952	84.5732	85.7427	Projected	e0	LL	SWE
all-cause (indirect)	Sweden	Men	2031	83.3867	84.7778	85.9702	Projected	e0	LL	SWE
all-cause (indirect)	Sweden	Men	2032	83.5773	84.9838	86.189	Projected	e0	LL	SWE
all-cause (indirect)	Sweden	Men	2033	83.7565	85.1875	86.4092	Projected	e0	LL	SWE
all-cause (indirect)	Sweden	Men	2034	83.9334	85.3843	86.6362	Projected	e0	LL	SWE
all-cause (indirect)	Sweden	Men	2035	84.1163	85.5837	86.8356	Projected	e0	LL	SWE
all-cause (indirect)	Sweden	Men	2036	84.3076	85.7794	87.0456	Projected	e0	LL	SWE
all-cause (indirect)	Sweden	Men	2037	84.4914	85.9759	87.2519	Projected	e0	LL	SWE
all-cause (indirect)	Sweden	Men	2038	84.6665	86.1644	87.4548	Projected	e0	LL	SWE
all-cause (indirect)	Sweden	Men	2039	84.8373	86.3529	87.6553	Projected	e0	LL	SWE
all-cause (indirect)	Sweden	Men	2040	85.0171	86.541	87.8517	Projected	e0	LL	SWE
all-cause (indirect)	Sweden	Men	2041	85.1887	86.7232	88.0497	Projected	e0	LL	SWE
all-cause (indirect)	Sweden	Men	2042	85.3624	86.9087	88.242	Projected	e0	LL	SWE
all-cause (indirect)	Sweden	Men	2043	85.5454	87.0894	88.4272	Projected	e0	LL	SWE
all-cause (indirect)	Sweden	Men	2044	85.7128	87.27	88.6164	Projected	e0	LL	SWE
all-cause (indirect)	Sweden	Men	2045	85.894	87.4501	88.8112	Projected	e0	LL	SWE
all-cause (indirect)	Sweden	Men	2046	86.0549	87.6296	88.9868	Projected	e0	LL	SWE
all-cause (indirect)	Sweden	Men	2047	86.2241	87.8021	89.1661	Projected	e0	LL	SWE
all-cause (indirect)	Sweden	Men	2048	86.3872	87.9773	89.3417	Projected	e0	LL	SWE
all-cause (indirect)	Sweden	Men	2049	86.5477	88.1483	89.523	Projected	e0	LL	SWE
all-cause (indirect)	Sweden	Men	2050	86.7177	88.3157	89.7057	Projected	e0	LL	SWE
all-cause (indirect)	Sweden	Men	2051	86.8757	88.4821	89.8679	Projected	e0	LL	SWE
all-cause (indirect)	Sweden	Men	2052	87.0484	88.6513	90.0412	Projected	e0	LL	SWE
all-cause (indirect)	Sweden	Men	2053	87.2133	88.8125	90.2165	Projected	e0	LL	SWE
all-cause (indirect)	Sweden	Men	2054	87.3634	88.9771	90.3847	Projected	e0	LL	SWE
all-cause (indirect)	Sweden	Men	2055	87.5412	89.1349	90.5532	Projected	e0	LL	SWE
all-cause (indirect)	Sweden	Men	2056	87.6912	89.2971	90.7179	Projected	e0	LL	SWE
all-cause (indirect)	Sweden	Men	2057	87.8427	89.452	90.8738	Projected	e0	LL	SWE
all-cause (indirect)	Sweden	Men	2058	88.0035	89.6108	91.0369	Projected	e0	LL	SWE
all-cause (indirect)	Sweden	Men	2059	88.1652	89.7646	91.1933	Projected	e0	LL	SWE
all-cause (indirect)	Sweden	Men	2060	88.3104	89.9168	91.3443	Projected	e0	LL	SWE
all-cause (indirect)	Sweden	Men	2061	88.4542	90.067	91.5041	Projected	e0	LL	SWE
all-cause (indirect)	Sweden	Men	2062	88.6046	90.2115	91.6499	Projected	e0	LL	SWE
all-cause (indirect)	Sweden	Men	2063	88.7436	90.3614	91.8008	Projected	e0	LL	SWE
all-cause (indirect)	Sweden	Men	2064	88.8886	90.5003	91.9481	Projected	e0	LL	SWE
all-cause (indirect)	Sweden	Men	2065	89.0301	90.6419	92.0978	Projected	e0	LL	SWE
all-cause (indirect)	Switzerland	Men	1990		73.9552		Observed	e0	LL	CHE
all-cause (indirect)	Switzerland	Men	1991		74.1076		Observed	e0	LL	CHE
all-cause (indirect)	Switzerland	Men	1992		74.4487		Observed	e0	LL	CHE
all-cause (indirect)	Switzerland	Men	1993		74.9031		Observed	e0	LL	CHE
all-cause (indirect)	Switzerland	Men	1994		75.1379		Observed	e0	LL	CHE
all-cause (indirect)	Switzerland	Men	1995		75.2945		Observed	e0	LL	CHE
all-cause (indirect)	Switzerland	Men	1996		75.9328		Observed	e0	LL	CHE
all-cause (indirect)	Switzerland	Men	1997		76.2426		Observed	e0	LL	CHE
all-cause (indirect)	Switzerland	Men	1998		76.3138		Observed	e0	LL	CHE
all-cause (indirect)	Switzerland	Men	1999		76.7782		Observed	e0	LL	CHE
all-cause (indirect)	Switzerland	Men	2000		76.9175		Observed	e0	LL	CHE
all-cause (indirect)	Switzerland	Men	2001		77.3509		Observed	e0	LL	CHE
all-cause (indirect)	Switzerland	Men	2002		77.7264		Observed	e0	LL	CHE
all-cause (indirect)	Switzerland	Men	2003		77.8881		Observed	e0	LL	CHE
all-cause (indirect)	Switzerland	Men	2004		78.4251		Observed	e0	LL	CHE
all-cause (indirect)	Switzerland	Men	2005		78.5742		Observed	e0	LL	CHE
all-cause (indirect)	Switzerland	Men	2006		79.0333		Observed	e0	LL	CHE
all-cause (indirect)	Switzerland	Men	2007		79.2513		Observed	e0	LL	CHE
all-cause (indirect)	Switzerland	Men	2008		79.5704		Observed	e0	LL	CHE
all-cause (indirect)	Switzerland	Men	2009		79.6262		Observed	e0	LL	CHE
all-cause (indirect)	Switzerland	Men	2010		80.0301		Observed	e0	LL	CHE
all-cause (indirect)	Switzerland	Men	2011		80.2926		Observed	e0	LL	CHE
all-cause (indirect)	Switzerland	Men	2012		80.4581		Observed	e0	LL	CHE
all-cause (indirect)	Switzerland	Men	2013		80.5193		Observed	e0	LL	CHE
all-cause (indirect)	Switzerland	Men	2014		80.9325		Observed	e0	LL	CHE
all-cause (indirect)	Switzerland	Men	2015	81.0829	81.6317	82.1622	Projected	e0	LL	CHE
all-cause (indirect)	Switzerland	Men	2016	81.3324	82.0255	82.6894	Projected	e0	LL	CHE
all-cause (indirect)	Switzerland	Men	2017	81.4718	82.2643	83.0104	Projected	e0	LL	CHE
all-cause (indirect)	Switzerland	Men	2018	81.6223	82.5012	83.3144	Projected	e0	LL	CHE
all-cause (indirect)	Switzerland	Men	2019	81.7872	82.7325	83.6023	Projected	e0	LL	CHE
all-cause (indirect)	Switzerland	Men	2020	81.9558	82.9635	83.8898	Projected	e0	LL	CHE
all-cause (indirect)	Switzerland	Men	2021	82.1216	83.1859	84.151	Projected	e0	LL	CHE
all-cause (indirect)	Switzerland	Men	2022	82.2955	83.4139	84.4155	Projected	e0	LL	CHE
all-cause (indirect)	Switzerland	Men	2023	82.4674	83.6306	84.6671	Projected	e0	LL	CHE
all-cause (indirect)	Switzerland	Men	2024	82.6412	83.8442	84.9139	Projected	e0	LL	CHE
all-cause (indirect)	Switzerland	Men	2025	82.8166	84.057	85.1595	Projected	e0	LL	CHE
all-cause (indirect)	Switzerland	Men	2026	82.9978	84.2668	85.3996	Projected	e0	LL	CHE
all-cause (indirect)	Switzerland	Men	2027	83.1566	84.4729	85.6342	Projected	e0	LL	CHE
all-cause (indirect)	Switzerland	Men	2028	83.3326	84.6763	85.8616	Projected	e0	LL	CHE
all-cause (indirect)	Switzerland	Men	2029	83.5079	84.8765	86.0892	Projected	e0	LL	CHE
all-cause (indirect)	Switzerland	Men	2030	83.6782	85.0775	86.2954	Projected	e0	LL	CHE
all-cause (indirect)	Switzerland	Men	2031	83.838	85.2722	86.5144	Projected	e0	LL	CHE
all-cause (indirect)	Switzerland	Men	2032	84.0117	85.467	86.7247	Projected	e0	LL	CHE
all-cause (indirect)	Switzerland	Men	2033	84.1871	85.6564	86.9404	Projected	e0	LL	CHE
all-cause (indirect)	Switzerland	Men	2034	84.3544	85.8485	87.1318	Projected	e0	LL	CHE
all-cause (indirect)	Switzerland	Men	2035	84.5244	86.034	87.3544	Projected	e0	LL	CHE
all-cause (indirect)	Switzerland	Men	2036	84.6866	86.2178	87.5495	Projected	e0	LL	CHE
all-cause (indirect)	Switzerland	Men	2037	84.8465	86.399	87.7464	Projected	e0	LL	CHE
all-cause (indirect)	Switzerland	Men	2038	85.0271	86.5795	87.9365	Projected	e0	LL	CHE
all-cause (indirect)	Switzerland	Men	2039	85.1822	86.761	88.1371	Projected	e0	LL	CHE
all-cause (indirect)	Switzerland	Men	2040	85.3545	86.9375	88.3177	Projected	e0	LL	CHE
all-cause (indirect)	Switzerland	Men	2041	85.5189	87.1116	88.4959	Projected	e0	LL	CHE
all-cause (indirect)	Switzerland	Men	2042	85.6752	87.2856	88.6871	Projected	e0	LL	CHE
all-cause (indirect)	Switzerland	Men	2043	85.8361	87.4562	88.8737	Projected	e0	LL	CHE
all-cause (indirect)	Switzerland	Men	2044	86.0045	87.6314	89.0472	Projected	e0	LL	CHE
all-cause (indirect)	Switzerland	Men	2045	86.1483	87.8012	89.2329	Projected	e0	LL	CHE
all-cause (indirect)	Switzerland	Men	2046	86.317	87.9668	89.4029	Projected	e0	LL	CHE
all-cause (indirect)	Switzerland	Men	2047	86.4685	88.1313	89.5767	Projected	e0	LL	CHE
all-cause (indirect)	Switzerland	Men	2048	86.6312	88.2976	89.7556	Projected	e0	LL	CHE
all-cause (indirect)	Switzerland	Men	2049	86.7749	88.4642	89.9198	Projected	e0	LL	CHE
all-cause (indirect)	Switzerland	Men	2050	86.9317	88.6238	90.0939	Projected	e0	LL	CHE
all-cause (indirect)	Switzerland	Men	2051	87.0946	88.7885	90.2603	Projected	e0	LL	CHE
all-cause (indirect)	Switzerland	Men	2052	87.2353	88.9455	90.429	Projected	e0	LL	CHE
all-cause (indirect)	Switzerland	Men	2053	87.3932	89.1009	90.5821	Projected	e0	LL	CHE
all-cause (indirect)	Switzerland	Men	2054	87.546	89.2584	90.7441	Projected	e0	LL	CHE
all-cause (indirect)	Switzerland	Men	2055	87.6981	89.41	90.9067	Projected	e0	LL	CHE
all-cause (indirect)	Switzerland	Men	2056	87.8503	89.5642	91.0643	Projected	e0	LL	CHE
all-cause (indirect)	Switzerland	Men	2057	87.993	89.7187	91.2248	Projected	e0	LL	CHE
all-cause (indirect)	Switzerland	Men	2058	88.1505	89.8677	91.3638	Projected	e0	LL	CHE
all-cause (indirect)	Switzerland	Men	2059	88.2912	90.0143	91.5211	Projected	e0	LL	CHE
all-cause (indirect)	Switzerland	Men	2060	88.4446	90.1678	91.6724	Projected	e0	LL	CHE
all-cause (indirect)	Switzerland	Men	2061	88.5821	90.3075	91.8256	Projected	e0	LL	CHE
all-cause (indirect)	Switzerland	Men	2062	88.726	90.4551	91.9672	Projected	e0	LL	CHE
all-cause (indirect)	Switzerland	Men	2063	88.8689	90.5945	92.1115	Projected	e0	LL	CHE
all-cause (indirect)	Switzerland	Men	2064	89.0023	90.7401	92.2559	Projected	e0	LL	CHE
all-cause (indirect)	Switzerland	Men	2065	89.1488	90.88	92.3996	Projected	e0	LL	CHE
all-cause (indirect)	United Kingdom	Men	1990		72.8378		Observed	e0	LL	GBR_NP
all-cause (indirect)	United Kingdom	Men	1991		73.0804		Observed	e0	LL	GBR_NP
all-cause (indirect)	United Kingdom	Men	1992		73.5085		Observed	e0	LL	GBR_NP
all-cause (indirect)	United Kingdom	Men	1993		73.4373		Observed	e0	LL	GBR_NP
all-cause (indirect)	United Kingdom	Men	1994		73.9918		Observed	e0	LL	GBR_NP
all-cause (indirect)	United Kingdom	Men	1995		73.9247		Observed	e0	LL	GBR_NP
all-cause (indirect)	United Kingdom	Men	1996		74.2174		Observed	e0	LL	GBR_NP
all-cause (indirect)	United Kingdom	Men	1997		74.5654		Observed	e0	LL	GBR_NP
all-cause (indirect)	United Kingdom	Men	1998		74.7148		Observed	e0	LL	GBR_NP
all-cause (indirect)	United Kingdom	Men	1999		74.8694		Observed	e0	LL	GBR_NP
all-cause (indirect)	United Kingdom	Men	2000		75.3741		Observed	e0	LL	GBR_NP
all-cause (indirect)	United Kingdom	Men	2001		75.6925		Observed	e0	LL	GBR_NP
all-cause (indirect)	United Kingdom	Men	2002		75.8439		Observed	e0	LL	GBR_NP
all-cause (indirect)	United Kingdom	Men	2003		76.0627		Observed	e0	LL	GBR_NP
all-cause (indirect)	United Kingdom	Men	2004		76.6276		Observed	e0	LL	GBR_NP
all-cause (indirect)	United Kingdom	Men	2005		76.9035		Observed	e0	LL	GBR_NP
all-cause (indirect)	United Kingdom	Men	2006		77.1162		Observed	e0	LL	GBR_NP
all-cause (indirect)	United Kingdom	Men	2007		77.3511		Observed	e0	LL	GBR_NP
all-cause (indirect)	United Kingdom	Men	2008		77.5453		Observed	e0	LL	GBR_NP
all-cause (indirect)	United Kingdom	Men	2009		78.0244		Observed	e0	LL	GBR_NP
all-cause (indirect)	United Kingdom	Men	2010		78.3566		Observed	e0	LL	GBR_NP
all-cause (indirect)	United Kingdom	Men	2011		78.774		Observed	e0	LL	GBR_NP
all-cause (indirect)	United Kingdom	Men	2012		78.9543		Observed	e0	LL	GBR_NP
all-cause (indirect)	United Kingdom	Men	2013		78.9979		Observed	e0	LL	GBR_NP
all-cause (indirect)	United Kingdom	Men	2014		79.2473		Observed	e0	LL	GBR_NP
all-cause (indirect)	United Kingdom	Men	2015	79.1519	79.9653	80.7117	Projected	e0	LL	GBR_NP
all-cause (indirect)	United Kingdom	Men	2016	79.3325	80.3362	81.2413	Projected	e0	LL	GBR_NP
all-cause (indirect)	United Kingdom	Men	2017	79.5379	80.6363	81.641	Projected	e0	LL	GBR_NP
all-cause (indirect)	United Kingdom	Men	2018	79.7157	80.9209	82.0048	Projected	e0	LL	GBR_NP
all-cause (indirect)	United Kingdom	Men	2019	79.9086	81.2133	82.3703	Projected	e0	LL	GBR_NP
all-cause (indirect)	United Kingdom	Men	2020	80.1091	81.4979	82.7065	Projected	e0	LL	GBR_NP
all-cause (indirect)	United Kingdom	Men	2021	80.3315	81.7809	83.0375	Projected	e0	LL	GBR_NP
all-cause (indirect)	United Kingdom	Men	2022	80.5345	82.0523	83.349	Projected	e0	LL	GBR_NP
all-cause (indirect)	United Kingdom	Men	2023	80.7417	82.3272	83.6673	Projected	e0	LL	GBR_NP
all-cause (indirect)	United Kingdom	Men	2024	80.9455	82.5939	83.9631	Projected	e0	LL	GBR_NP
all-cause (indirect)	United Kingdom	Men	2025	81.1692	82.8517	84.2605	Projected	e0	LL	GBR_NP
all-cause (indirect)	United Kingdom	Men	2026	81.3841	83.1197	84.5557	Projected	e0	LL	GBR_NP
all-cause (indirect)	United Kingdom	Men	2027	81.6181	83.3724	84.8443	Projected	e0	LL	GBR_NP
all-cause (indirect)	United Kingdom	Men	2028	81.8185	83.6275	85.1259	Projected	e0	LL	GBR_NP
all-cause (indirect)	United Kingdom	Men	2029	82.0495	83.8765	85.3917	Projected	e0	LL	GBR_NP
all-cause (indirect)	United Kingdom	Men	2030	82.2718	84.1307	85.6583	Projected	e0	LL	GBR_NP
all-cause (indirect)	United Kingdom	Men	2031	82.5112	84.3723	85.9251	Projected	e0	LL	GBR_NP
all-cause (indirect)	United Kingdom	Men	2032	82.7249	84.6124	86.1772	Projected	e0	LL	GBR_NP
all-cause (indirect)	United Kingdom	Men	2033	82.9445	84.852	86.4207	Projected	e0	LL	GBR_NP
all-cause (indirect)	United Kingdom	Men	2034	83.1497	85.0855	86.673	Projected	e0	LL	GBR_NP
all-cause (indirect)	United Kingdom	Men	2035	83.3754	85.3165	86.915	Projected	e0	LL	GBR_NP
all-cause (indirect)	United Kingdom	Men	2036	83.5912	85.5485	87.1544	Projected	e0	LL	GBR_NP
all-cause (indirect)	United Kingdom	Men	2037	83.8002	85.7743	87.3849	Projected	e0	LL	GBR_NP
all-cause (indirect)	United Kingdom	Men	2038	84.0137	85.9977	87.6217	Projected	e0	LL	GBR_NP
all-cause (indirect)	United Kingdom	Men	2039	84.2022	86.221	87.8359	Projected	e0	LL	GBR_NP
all-cause (indirect)	United Kingdom	Men	2040	84.439	86.4382	88.054	Projected	e0	LL	GBR_NP
all-cause (indirect)	United Kingdom	Men	2041	84.6295	86.651	88.2772	Projected	e0	LL	GBR_NP
all-cause (indirect)	United Kingdom	Men	2042	84.8457	86.8619	88.5058	Projected	e0	LL	GBR_NP
all-cause (indirect)	United Kingdom	Men	2043	85.0503	87.0735	88.7016	Projected	e0	LL	GBR_NP
all-cause (indirect)	United Kingdom	Men	2044	85.261	87.2814	88.9316	Projected	e0	LL	GBR_NP
all-cause (indirect)	United Kingdom	Men	2045	85.4636	87.4865	89.1191	Projected	e0	LL	GBR_NP
all-cause (indirect)	United Kingdom	Men	2046	85.65	87.6934	89.3309	Projected	e0	LL	GBR_NP
all-cause (indirect)	United Kingdom	Men	2047	85.86	87.8897	89.5271	Projected	e0	LL	GBR_NP
all-cause (indirect)	United Kingdom	Men	2048	86.0391	88.0833	89.7167	Projected	e0	LL	GBR_NP
all-cause (indirect)	United Kingdom	Men	2049	86.2457	88.2861	89.9223	Projected	e0	LL	GBR_NP
all-cause (indirect)	United Kingdom	Men	2050	86.4482	88.4794	90.1124	Projected	e0	LL	GBR_NP
all-cause (indirect)	United Kingdom	Men	2051	86.6287	88.6715	90.2975	Projected	e0	LL	GBR_NP
all-cause (indirect)	United Kingdom	Men	2052	86.8266	88.8543	90.4841	Projected	e0	LL	GBR_NP
all-cause (indirect)	United Kingdom	Men	2053	87.0249	89.0323	90.6649	Projected	e0	LL	GBR_NP
all-cause (indirect)	United Kingdom	Men	2054	87.2075	89.2149	90.8461	Projected	e0	LL	GBR_NP
all-cause (indirect)	United Kingdom	Men	2055	87.4061	89.3976	91.0184	Projected	e0	LL	GBR_NP
all-cause (indirect)	United Kingdom	Men	2056	87.5914	89.5711	91.2043	Projected	e0	LL	GBR_NP
all-cause (indirect)	United Kingdom	Men	2057	87.7616	89.7409	91.3532	Projected	e0	LL	GBR_NP
all-cause (indirect)	United Kingdom	Men	2058	87.9462	89.9161	91.5324	Projected	e0	LL	GBR_NP
all-cause (indirect)	United Kingdom	Men	2059	88.1079	90.0863	91.7004	Projected	e0	LL	GBR_NP
all-cause (indirect)	United Kingdom	Men	2060	88.2938	90.2496	91.8602	Projected	e0	LL	GBR_NP
all-cause (indirect)	United Kingdom	Men	2061	88.4524	90.4127	92.0156	Projected	e0	LL	GBR_NP
all-cause (indirect)	United Kingdom	Men	2062	88.6296	90.5713	92.1742	Projected	e0	LL	GBR_NP
all-cause (indirect)	United Kingdom	Men	2063	88.7915	90.7331	92.3266	Projected	e0	LL	GBR_NP
all-cause (indirect)	United Kingdom	Men	2064	88.9595	90.8896	92.4847	Projected	e0	LL	GBR_NP
all-cause (indirect)	United Kingdom	Men	2065	89.1027	91.0386	92.6218	Projected	e0	LL	GBR_NP
all-cause (indirect)	Austria	Women	1990		78.8662		Observed	e0	LL	AUT
all-cause (indirect)	Austria	Women	1991		78.9816		Observed	e0	LL	AUT
all-cause (indirect)	Austria	Women	1992		79.1467		Observed	e0	LL	AUT
all-cause (indirect)	Austria	Women	1993		79.3438		Observed	e0	LL	AUT
all-cause (indirect)	Austria	Women	1994		79.6371		Observed	e0	LL	AUT
all-cause (indirect)	Austria	Women	1995		79.9542		Observed	e0	LL	AUT
all-cause (indirect)	Austria	Women	1996		80.0809		Observed	e0	LL	AUT
all-cause (indirect)	Austria	Women	1997		80.5316		Observed	e0	LL	AUT
all-cause (indirect)	Austria	Women	1998		80.8111		Observed	e0	LL	AUT
all-cause (indirect)	Austria	Women	1999		80.8331		Observed	e0	LL	AUT
all-cause (indirect)	Austria	Women	2000		81.0983		Observed	e0	LL	AUT
all-cause (indirect)	Austria	Women	2001		81.5604		Observed	e0	LL	AUT
all-cause (indirect)	Austria	Women	2002		81.6548		Observed	e0	LL	AUT
all-cause (indirect)	Austria	Women	2003		81.54		Observed	e0	LL	AUT
all-cause (indirect)	Austria	Women	2004		82.0993		Observed	e0	LL	AUT
all-cause (indirect)	Austria	Women	2005		82.2086		Observed	e0	LL	AUT
all-cause (indirect)	Austria	Women	2006		82.6357		Observed	e0	LL	AUT
all-cause (indirect)	Austria	Women	2007		82.8314		Observed	e0	LL	AUT
all-cause (indirect)	Austria	Women	2008		82.9527		Observed	e0	LL	AUT
all-cause (indirect)	Austria	Women	2009		82.8479		Observed	e0	LL	AUT
all-cause (indirect)	Austria	Women	2010		83.1284		Observed	e0	LL	AUT
all-cause (indirect)	Austria	Women	2011		83.4291		Observed	e0	LL	AUT
all-cause (indirect)	Austria	Women	2012		83.2887		Observed	e0	LL	AUT
all-cause (indirect)	Austria	Women	2013		83.5611		Observed	e0	LL	AUT
all-cause (indirect)	Austria	Women	2014		83.732		Observed	e0	LL	AUT
all-cause (indirect)	Austria	Women	2015	83.9925	84.4653	84.9219	Projected	e0	LL	AUT
all-cause (indirect)	Austria	Women	2016	84.0429	84.6303	85.1932	Projected	e0	LL	AUT
all-cause (indirect)	Austria	Women	2017	84.1394	84.8057	85.4291	Projected	e0	LL	AUT
all-cause (indirect)	Austria	Women	2018	84.2367	84.9759	85.6631	Projected	e0	LL	AUT
all-cause (indirect)	Austria	Women	2019	84.3506	85.1484	85.8952	Projected	e0	LL	AUT
all-cause (indirect)	Austria	Women	2020	84.4643	85.318	86.1193	Projected	e0	LL	AUT
all-cause (indirect)	Austria	Women	2021	84.5798	85.491	86.3348	Projected	e0	LL	AUT
all-cause (indirect)	Austria	Women	2022	84.6955	85.6604	86.5425	Projected	e0	LL	AUT
all-cause (indirect)	Austria	Women	2023	84.8353	85.8294	86.7532	Projected	e0	LL	AUT
all-cause (indirect)	Austria	Women	2024	84.9622	86.0014	86.9538	Projected	e0	LL	AUT
all-cause (indirect)	Austria	Women	2025	85.1028	86.1717	87.1468	Projected	e0	LL	AUT
all-cause (indirect)	Austria	Women	2026	85.252	86.343	87.3503	Projected	e0	LL	AUT
all-cause (indirect)	Austria	Women	2027	85.3804	86.5189	87.5362	Projected	e0	LL	AUT
all-cause (indirect)	Austria	Women	2028	85.5278	86.6893	87.7349	Projected	e0	LL	AUT
all-cause (indirect)	Austria	Women	2029	85.683	86.8606	87.9182	Projected	e0	LL	AUT
all-cause (indirect)	Austria	Women	2030	85.8326	87.0365	88.1057	Projected	e0	LL	AUT
all-cause (indirect)	Austria	Women	2031	85.9859	87.2063	88.2951	Projected	e0	LL	AUT
all-cause (indirect)	Austria	Women	2032	86.1457	87.381	88.4809	Projected	e0	LL	AUT
all-cause (indirect)	Austria	Women	2033	86.2963	87.5514	88.6612	Projected	e0	LL	AUT
all-cause (indirect)	Austria	Women	2034	86.472	87.7249	88.8431	Projected	e0	LL	AUT
all-cause (indirect)	Austria	Women	2035	86.6174	87.9004	89.0297	Projected	e0	LL	AUT
all-cause (indirect)	Austria	Women	2036	86.7804	88.0725	89.2044	Projected	e0	LL	AUT
all-cause (indirect)	Austria	Women	2037	86.9492	88.2438	89.3821	Projected	e0	LL	AUT
all-cause (indirect)	Austria	Women	2038	87.1161	88.418	89.5517	Projected	e0	LL	AUT
all-cause (indirect)	Austria	Women	2039	87.2866	88.5899	89.7259	Projected	e0	LL	AUT
all-cause (indirect)	Austria	Women	2040	87.4593	88.7637	89.9068	Projected	e0	LL	AUT
all-cause (indirect)	Austria	Women	2041	87.6112	88.9347	90.0694	Projected	e0	LL	AUT
all-cause (indirect)	Austria	Women	2042	87.7854	89.1031	90.2414	Projected	e0	LL	AUT
all-cause (indirect)	Austria	Women	2043	87.9518	89.2782	90.4105	Projected	e0	LL	AUT
all-cause (indirect)	Austria	Women	2044	88.1176	89.4487	90.5771	Projected	e0	LL	AUT
all-cause (indirect)	Austria	Women	2045	88.2732	89.616	90.74	Projected	e0	LL	AUT
all-cause (indirect)	Austria	Women	2046	88.4419	89.7841	90.9064	Projected	e0	LL	AUT
all-cause (indirect)	Austria	Women	2047	88.6103	89.951	91.059	Projected	e0	LL	AUT
all-cause (indirect)	Austria	Women	2048	88.7825	90.1146	91.2238	Projected	e0	LL	AUT
all-cause (indirect)	Austria	Women	2049	88.9419	90.2745	91.3789	Projected	e0	LL	AUT
all-cause (indirect)	Austria	Women	2050	89.1088	90.4322	91.5278	Projected	e0	LL	AUT
all-cause (indirect)	Austria	Women	2051	89.2655	90.5865	91.6754	Projected	e0	LL	AUT
all-cause (indirect)	Austria	Women	2052	89.4284	90.7406	91.8301	Projected	e0	LL	AUT
all-cause (indirect)	Austria	Women	2053	89.5837	90.89	91.9685	Projected	e0	LL	AUT
all-cause (indirect)	Austria	Women	2054	89.7336	91.0424	92.108	Projected	e0	LL	AUT
all-cause (indirect)	Austria	Women	2055	89.8951	91.1873	92.2488	Projected	e0	LL	AUT
all-cause (indirect)	Austria	Women	2056	90.0311	91.329	92.3932	Projected	e0	LL	AUT
all-cause (indirect)	Austria	Women	2057	90.1809	91.4705	92.5174	Projected	e0	LL	AUT
all-cause (indirect)	Austria	Women	2058	90.3345	91.6127	92.656	Projected	e0	LL	AUT
all-cause (indirect)	Austria	Women	2059	90.4797	91.7535	92.7818	Projected	e0	LL	AUT
all-cause (indirect)	Austria	Women	2060	90.6283	91.8856	92.9164	Projected	e0	LL	AUT
all-cause (indirect)	Austria	Women	2061	90.7643	92.0235	93.0406	Projected	e0	LL	AUT
all-cause (indirect)	Austria	Women	2062	90.9158	92.1561	93.1638	Projected	e0	LL	AUT
all-cause (indirect)	Austria	Women	2063	91.0521	92.285	93.2853	Projected	e0	LL	AUT
all-cause (indirect)	Austria	Women	2064	91.1933	92.414	93.4131	Projected	e0	LL	AUT
all-cause (indirect)	Austria	Women	2065	91.3255	92.5425	93.5261	Projected	e0	LL	AUT
all-cause (indirect)	Belgium	Women	1990		79.3354		Observed	e0	LL	BEL
all-cause (indirect)	Belgium	Women	1991		79.4715		Observed	e0	LL	BEL
all-cause (indirect)	Belgium	Women	1992		79.6672		Observed	e0	LL	BEL
all-cause (indirect)	Belgium	Women	1993		79.7386		Observed	e0	LL	BEL
all-cause (indirect)	Belgium	Women	1994		79.9958		Observed	e0	LL	BEL
all-cause (indirect)	Belgium	Women	1995		80.1882		Observed	e0	LL	BEL
all-cause (indirect)	Belgium	Women	1996		80.4712		Observed	e0	LL	BEL
all-cause (indirect)	Belgium	Women	1997		80.552		Observed	e0	LL	BEL
all-cause (indirect)	Belgium	Women	1998		80.5641		Observed	e0	LL	BEL
all-cause (indirect)	Belgium	Women	1999		80.871		Observed	e0	LL	BEL
all-cause (indirect)	Belgium	Women	2000		80.9051		Observed	e0	LL	BEL
all-cause (indirect)	Belgium	Women	2001		81.167		Observed	e0	LL	BEL
all-cause (indirect)	Belgium	Women	2002		81.1922		Observed	e0	LL	BEL
all-cause (indirect)	Belgium	Women	2003		81.2052		Observed	e0	LL	BEL
all-cause (indirect)	Belgium	Women	2004		81.863		Observed	e0	LL	BEL
all-cause (indirect)	Belgium	Women	2005		81.8604		Observed	e0	LL	BEL
all-cause (indirect)	Belgium	Women	2006		82.1494		Observed	e0	LL	BEL
all-cause (indirect)	Belgium	Women	2007		82.2146		Observed	e0	LL	BEL
all-cause (indirect)	Belgium	Women	2008		82.312		Observed	e0	LL	BEL
all-cause (indirect)	Belgium	Women	2009		82.4395		Observed	e0	LL	BEL
all-cause (indirect)	Belgium	Women	2010		82.6491		Observed	e0	LL	BEL
all-cause (indirect)	Belgium	Women	2011		82.8743		Observed	e0	LL	BEL
all-cause (indirect)	Belgium	Women	2012		82.8371		Observed	e0	LL	BEL
all-cause (indirect)	Belgium	Women	2013		82.934		Observed	e0	LL	BEL
all-cause (indirect)	Belgium	Women	2014		83.5194		Observed	e0	LL	BEL
all-cause (indirect)	Belgium	Women	2015	83.7013	84.2835	84.8453	Projected	e0	LL	BEL
all-cause (indirect)	Belgium	Women	2016	83.7676	84.4935	85.1983	Projected	e0	LL	BEL
all-cause (indirect)	Belgium	Women	2017	83.8603	84.6926	85.4908	Projected	e0	LL	BEL
all-cause (indirect)	Belgium	Women	2018	83.9616	84.8869	85.7752	Projected	e0	LL	BEL
all-cause (indirect)	Belgium	Women	2019	84.0781	85.0894	86.0389	Projected	e0	LL	BEL
all-cause (indirect)	Belgium	Women	2020	84.2113	85.2857	86.3057	Projected	e0	LL	BEL
all-cause (indirect)	Belgium	Women	2021	84.3395	85.4932	86.5639	Projected	e0	LL	BEL
all-cause (indirect)	Belgium	Women	2022	84.4935	85.6886	86.8146	Projected	e0	LL	BEL
all-cause (indirect)	Belgium	Women	2023	84.6255	85.8883	87.0615	Projected	e0	LL	BEL
all-cause (indirect)	Belgium	Women	2024	84.7787	86.0848	87.3037	Projected	e0	LL	BEL
all-cause (indirect)	Belgium	Women	2025	84.9447	86.2868	87.5325	Projected	e0	LL	BEL
all-cause (indirect)	Belgium	Women	2026	85.1037	86.4867	87.7743	Projected	e0	LL	BEL
all-cause (indirect)	Belgium	Women	2027	85.272	86.6847	88.0078	Projected	e0	LL	BEL
all-cause (indirect)	Belgium	Women	2028	85.4262	86.8823	88.2351	Projected	e0	LL	BEL
all-cause (indirect)	Belgium	Women	2029	85.5918	87.0765	88.4677	Projected	e0	LL	BEL
all-cause (indirect)	Belgium	Women	2030	85.7545	87.2774	88.6907	Projected	e0	LL	BEL
all-cause (indirect)	Belgium	Women	2031	85.9222	87.4727	88.9085	Projected	e0	LL	BEL
all-cause (indirect)	Belgium	Women	2032	86.1026	87.6706	89.1203	Projected	e0	LL	BEL
all-cause (indirect)	Belgium	Women	2033	86.2561	87.8627	89.3337	Projected	e0	LL	BEL
all-cause (indirect)	Belgium	Women	2034	86.4278	88.0559	89.5575	Projected	e0	LL	BEL
all-cause (indirect)	Belgium	Women	2035	86.5968	88.2457	89.7492	Projected	e0	LL	BEL
all-cause (indirect)	Belgium	Women	2036	86.7731	88.4339	89.9584	Projected	e0	LL	BEL
all-cause (indirect)	Belgium	Women	2037	86.9479	88.6192	90.1576	Projected	e0	LL	BEL
all-cause (indirect)	Belgium	Women	2038	87.1265	88.8047	90.359	Projected	e0	LL	BEL
all-cause (indirect)	Belgium	Women	2039	87.2795	88.9873	90.5638	Projected	e0	LL	BEL
all-cause (indirect)	Belgium	Women	2040	87.4525	89.1725	90.7548	Projected	e0	LL	BEL
all-cause (indirect)	Belgium	Women	2041	87.6278	89.35	90.9496	Projected	e0	LL	BEL
all-cause (indirect)	Belgium	Women	2042	87.7879	89.5268	91.1314	Projected	e0	LL	BEL
all-cause (indirect)	Belgium	Women	2043	87.9524	89.6994	91.3204	Projected	e0	LL	BEL
all-cause (indirect)	Belgium	Women	2044	88.1203	89.8749	91.5092	Projected	e0	LL	BEL
all-cause (indirect)	Belgium	Women	2045	88.2893	90.0524	91.6844	Projected	e0	LL	BEL
all-cause (indirect)	Belgium	Women	2046	88.4438	90.2266	91.866	Projected	e0	LL	BEL
all-cause (indirect)	Belgium	Women	2047	88.6169	90.3963	92.0387	Projected	e0	LL	BEL
all-cause (indirect)	Belgium	Women	2048	88.7724	90.5643	92.2187	Projected	e0	LL	BEL
all-cause (indirect)	Belgium	Women	2049	88.9291	90.7304	92.3995	Projected	e0	LL	BEL
all-cause (indirect)	Belgium	Women	2050	89.0878	90.892	92.5621	Projected	e0	LL	BEL
all-cause (indirect)	Belgium	Women	2051	89.2348	91.0559	92.7237	Projected	e0	LL	BEL
all-cause (indirect)	Belgium	Women	2052	89.3907	91.2138	92.8988	Projected	e0	LL	BEL
all-cause (indirect)	Belgium	Women	2053	89.5385	91.3678	93.0608	Projected	e0	LL	BEL
all-cause (indirect)	Belgium	Women	2054	89.6953	91.5176	93.2199	Projected	e0	LL	BEL
all-cause (indirect)	Belgium	Women	2055	89.8431	91.6664	93.3774	Projected	e0	LL	BEL
all-cause (indirect)	Belgium	Women	2056	89.9863	91.8139	93.5264	Projected	e0	LL	BEL
all-cause (indirect)	Belgium	Women	2057	90.112	91.9493	93.6713	Projected	e0	LL	BEL
all-cause (indirect)	Belgium	Women	2058	90.2406	92.088	93.804	Projected	e0	LL	BEL
all-cause (indirect)	Belgium	Women	2059	90.3715	92.2239	93.9596	Projected	e0	LL	BEL
all-cause (indirect)	Belgium	Women	2060	90.5057	92.3569	94.0915	Projected	e0	LL	BEL
all-cause (indirect)	Belgium	Women	2061	90.615	92.4842	94.2315	Projected	e0	LL	BEL
all-cause (indirect)	Belgium	Women	2062	90.7482	92.6144	94.3682	Projected	e0	LL	BEL
all-cause (indirect)	Belgium	Women	2063	90.853	92.7378	94.4941	Projected	e0	LL	BEL
all-cause (indirect)	Belgium	Women	2064	90.9885	92.8636	94.6252	Projected	e0	LL	BEL
all-cause (indirect)	Belgium	Women	2065	91.0969	92.9826	94.7383	Projected	e0	LL	BEL
all-cause (indirect)	Czech Republic	Women	1990		75.4018		Observed	e0	LL	CZE
all-cause (indirect)	Czech Republic	Women	1991		75.7453		Observed	e0	LL	CZE
all-cause (indirect)	Czech Republic	Women	1992		76.1783		Observed	e0	LL	CZE
all-cause (indirect)	Czech Republic	Women	1993		76.4295		Observed	e0	LL	CZE
all-cause (indirect)	Czech Republic	Women	1994		76.6479		Observed	e0	LL	CZE
all-cause (indirect)	Czech Republic	Women	1995		76.6502		Observed	e0	LL	CZE
all-cause (indirect)	Czech Republic	Women	1996		77.3185		Observed	e0	LL	CZE
all-cause (indirect)	Czech Republic	Women	1997		77.4262		Observed	e0	LL	CZE
all-cause (indirect)	Czech Republic	Women	1998		77.9866		Observed	e0	LL	CZE
all-cause (indirect)	Czech Republic	Women	1999		78.0798		Observed	e0	LL	CZE
all-cause (indirect)	Czech Republic	Women	2000		78.33		Observed	e0	LL	CZE
all-cause (indirect)	Czech Republic	Women	2001		78.5132		Observed	e0	LL	CZE
all-cause (indirect)	Czech Republic	Women	2002		78.7101		Observed	e0	LL	CZE
all-cause (indirect)	Czech Republic	Women	2003		78.6566		Observed	e0	LL	CZE
all-cause (indirect)	Czech Republic	Women	2004		79.2162		Observed	e0	LL	CZE
all-cause (indirect)	Czech Republic	Women	2005		79.2861		Observed	e0	LL	CZE
all-cause (indirect)	Czech Republic	Women	2006		79.8589		Observed	e0	LL	CZE
all-cause (indirect)	Czech Republic	Women	2007		80.0755		Observed	e0	LL	CZE
all-cause (indirect)	Czech Republic	Women	2008		80.3073		Observed	e0	LL	CZE
all-cause (indirect)	Czech Republic	Women	2009		80.2964		Observed	e0	LL	CZE
all-cause (indirect)	Czech Republic	Women	2010		80.6449		Observed	e0	LL	CZE
all-cause (indirect)	Czech Republic	Women	2011		80.8656		Observed	e0	LL	CZE
all-cause (indirect)	Czech Republic	Women	2012		80.9824		Observed	e0	LL	CZE
all-cause (indirect)	Czech Republic	Women	2013		81.1539		Observed	e0	LL	CZE
all-cause (indirect)	Czech Republic	Women	2014		81.7319		Observed	e0	LL	CZE
all-cause (indirect)	Czech Republic	Women	2015	81.6332	82.3014	82.9342	Projected	e0	LL	CZE
all-cause (indirect)	Czech Republic	Women	2016	81.6909	82.5144	83.2762	Projected	e0	LL	CZE
all-cause (indirect)	Czech Republic	Women	2017	81.8554	82.7651	83.6076	Projected	e0	LL	CZE
all-cause (indirect)	Czech Republic	Women	2018	81.9661	82.9882	83.9137	Projected	e0	LL	CZE
all-cause (indirect)	Czech Republic	Women	2019	82.1119	83.214	84.1995	Projected	e0	LL	CZE
all-cause (indirect)	Czech Republic	Women	2020	82.2697	83.4427	84.4827	Projected	e0	LL	CZE
all-cause (indirect)	Czech Republic	Women	2021	82.4266	83.6706	84.7628	Projected	e0	LL	CZE
all-cause (indirect)	Czech Republic	Women	2022	82.6202	83.9025	85.0498	Projected	e0	LL	CZE
all-cause (indirect)	Czech Republic	Women	2023	82.7853	84.1313	85.3135	Projected	e0	LL	CZE
all-cause (indirect)	Czech Republic	Women	2024	82.9704	84.3612	85.5705	Projected	e0	LL	CZE
all-cause (indirect)	Czech Republic	Women	2025	83.1473	84.5862	85.8293	Projected	e0	LL	CZE
all-cause (indirect)	Czech Republic	Women	2026	83.3365	84.8104	86.0775	Projected	e0	LL	CZE
all-cause (indirect)	Czech Republic	Women	2027	83.5124	85.0298	86.3201	Projected	e0	LL	CZE
all-cause (indirect)	Czech Republic	Women	2028	83.6986	85.2468	86.5631	Projected	e0	LL	CZE
all-cause (indirect)	Czech Republic	Women	2029	83.8861	85.4617	86.7984	Projected	e0	LL	CZE
all-cause (indirect)	Czech Republic	Women	2030	84.0735	85.6753	87.0253	Projected	e0	LL	CZE
all-cause (indirect)	Czech Republic	Women	2031	84.2576	85.8918	87.2492	Projected	e0	LL	CZE
all-cause (indirect)	Czech Republic	Women	2032	84.443	86.0997	87.472	Projected	e0	LL	CZE
all-cause (indirect)	Czech Republic	Women	2033	84.6385	86.3018	87.6947	Projected	e0	LL	CZE
all-cause (indirect)	Czech Republic	Women	2034	84.8167	86.4997	87.9125	Projected	e0	LL	CZE
all-cause (indirect)	Czech Republic	Women	2035	85.0016	86.7053	88.1179	Projected	e0	LL	CZE
all-cause (indirect)	Czech Republic	Women	2036	85.1874	86.9003	88.3185	Projected	e0	LL	CZE
all-cause (indirect)	Czech Republic	Women	2037	85.3554	87.0941	88.5124	Projected	e0	LL	CZE
all-cause (indirect)	Czech Republic	Women	2038	85.539	87.2797	88.7075	Projected	e0	LL	CZE
all-cause (indirect)	Czech Republic	Women	2039	85.7258	87.4681	88.9057	Projected	e0	LL	CZE
all-cause (indirect)	Czech Republic	Women	2040	85.8805	87.6466	89.0951	Projected	e0	LL	CZE
all-cause (indirect)	Czech Republic	Women	2041	86.0556	87.8262	89.2664	Projected	e0	LL	CZE
all-cause (indirect)	Czech Republic	Women	2042	86.2105	88.0013	89.4517	Projected	e0	LL	CZE
all-cause (indirect)	Czech Republic	Women	2043	86.3702	88.1703	89.6296	Projected	e0	LL	CZE
all-cause (indirect)	Czech Republic	Women	2044	86.5305	88.3464	89.7997	Projected	e0	LL	CZE
all-cause (indirect)	Czech Republic	Women	2045	86.7053	88.5109	89.9653	Projected	e0	LL	CZE
all-cause (indirect)	Czech Republic	Women	2046	86.8565	88.6724	90.1259	Projected	e0	LL	CZE
all-cause (indirect)	Czech Republic	Women	2047	87.0004	88.8342	90.285	Projected	e0	LL	CZE
all-cause (indirect)	Czech Republic	Women	2048	87.1646	88.9894	90.4393	Projected	e0	LL	CZE
all-cause (indirect)	Czech Republic	Women	2049	87.3178	89.1469	90.5943	Projected	e0	LL	CZE
all-cause (indirect)	Czech Republic	Women	2050	87.4795	89.3007	90.7439	Projected	e0	LL	CZE
all-cause (indirect)	Czech Republic	Women	2051	87.6252	89.4532	90.9014	Projected	e0	LL	CZE
all-cause (indirect)	Czech Republic	Women	2052	87.7817	89.6024	91.0482	Projected	e0	LL	CZE
all-cause (indirect)	Czech Republic	Women	2053	87.9145	89.7452	91.1888	Projected	e0	LL	CZE
all-cause (indirect)	Czech Republic	Women	2054	88.0653	89.8893	91.324	Projected	e0	LL	CZE
all-cause (indirect)	Czech Republic	Women	2055	88.2119	90.0337	91.4613	Projected	e0	LL	CZE
all-cause (indirect)	Czech Republic	Women	2056	88.3383	90.1705	91.6072	Projected	e0	LL	CZE
all-cause (indirect)	Czech Republic	Women	2057	88.4951	90.3095	91.7402	Projected	e0	LL	CZE
all-cause (indirect)	Czech Republic	Women	2058	88.64	90.4461	91.8718	Projected	e0	LL	CZE
all-cause (indirect)	Czech Republic	Women	2059	88.7742	90.5815	92.0128	Projected	e0	LL	CZE
all-cause (indirect)	Czech Republic	Women	2060	88.9035	90.7184	92.1356	Projected	e0	LL	CZE
all-cause (indirect)	Czech Republic	Women	2061	89.0555	90.8465	92.2617	Projected	e0	LL	CZE
all-cause (indirect)	Czech Republic	Women	2062	89.1832	90.9791	92.3873	Projected	e0	LL	CZE
all-cause (indirect)	Czech Republic	Women	2063	89.327	91.1109	92.5069	Projected	e0	LL	CZE
all-cause (indirect)	Czech Republic	Women	2064	89.4627	91.2397	92.6329	Projected	e0	LL	CZE
all-cause (indirect)	Czech Republic	Women	2065	89.5907	91.3665	92.7535	Projected	e0	LL	CZE
all-cause (indirect)	Denmark	Women	1990		77.7313		Observed	e0	LL	DNK
all-cause (indirect)	Denmark	Women	1991		77.9797		Observed	e0	LL	DNK
all-cause (indirect)	Denmark	Women	1992		77.9646		Observed	e0	LL	DNK
all-cause (indirect)	Denmark	Women	1993		77.7664		Observed	e0	LL	DNK
all-cause (indirect)	Denmark	Women	1994		78.0941		Observed	e0	LL	DNK
all-cause (indirect)	Denmark	Women	1995		77.8275		Observed	e0	LL	DNK
all-cause (indirect)	Denmark	Women	1996		78.252		Observed	e0	LL	DNK
all-cause (indirect)	Denmark	Women	1997		78.463		Observed	e0	LL	DNK
all-cause (indirect)	Denmark	Women	1998		78.8807		Observed	e0	LL	DNK
all-cause (indirect)	Denmark	Women	1999		78.8872		Observed	e0	LL	DNK
all-cause (indirect)	Denmark	Women	2000		79.1155		Observed	e0	LL	DNK
all-cause (indirect)	Denmark	Women	2001		79.2116		Observed	e0	LL	DNK
all-cause (indirect)	Denmark	Women	2002		79.3358		Observed	e0	LL	DNK
all-cause (indirect)	Denmark	Women	2003		80.0371		Observed	e0	LL	DNK
all-cause (indirect)	Denmark	Women	2004		79.8024		Observed	e0	LL	DNK
all-cause (indirect)	Denmark	Women	2005		80.4409		Observed	e0	LL	DNK
all-cause (indirect)	Denmark	Women	2006		80.5101		Observed	e0	LL	DNK
all-cause (indirect)	Denmark	Women	2007		80.5246		Observed	e0	LL	DNK
all-cause (indirect)	Denmark	Women	2008		80.9127		Observed	e0	LL	DNK
all-cause (indirect)	Denmark	Women	2009		81.0251		Observed	e0	LL	DNK
all-cause (indirect)	Denmark	Women	2010		81.3224		Observed	e0	LL	DNK
all-cause (indirect)	Denmark	Women	2011		81.8214		Observed	e0	LL	DNK
all-cause (indirect)	Denmark	Women	2012		82.0259		Observed	e0	LL	DNK
all-cause (indirect)	Denmark	Women	2013		82.3032		Observed	e0	LL	DNK
all-cause (indirect)	Denmark	Women	2014		82.6674		Observed	e0	LL	DNK
all-cause (indirect)	Denmark	Women	2015	82.347	83.2046	83.9507	Projected	e0	LL	DNK
all-cause (indirect)	Denmark	Women	2016	82.3971	83.4782	84.4136	Projected	e0	LL	DNK
all-cause (indirect)	Denmark	Women	2017	82.5506	83.776	84.8232	Projected	e0	LL	DNK
all-cause (indirect)	Denmark	Women	2018	82.6859	84.0528	85.1952	Projected	e0	LL	DNK
all-cause (indirect)	Denmark	Women	2019	82.8572	84.3427	85.5586	Projected	e0	LL	DNK
all-cause (indirect)	Denmark	Women	2020	83.0386	84.6269	85.9028	Projected	e0	LL	DNK
all-cause (indirect)	Denmark	Women	2021	83.2165	84.9125	86.2427	Projected	e0	LL	DNK
all-cause (indirect)	Denmark	Women	2022	83.4149	85.1945	86.55	Projected	e0	LL	DNK
all-cause (indirect)	Denmark	Women	2023	83.6109	85.4719	86.8623	Projected	e0	LL	DNK
all-cause (indirect)	Denmark	Women	2024	83.821	85.7454	87.1561	Projected	e0	LL	DNK
all-cause (indirect)	Denmark	Women	2025	84.0298	86.0152	87.4403	Projected	e0	LL	DNK
all-cause (indirect)	Denmark	Women	2026	84.2462	86.2908	87.7271	Projected	e0	LL	DNK
all-cause (indirect)	Denmark	Women	2027	84.4508	86.5522	87.9938	Projected	e0	LL	DNK
all-cause (indirect)	Denmark	Women	2028	84.6572	86.8111	88.2607	Projected	e0	LL	DNK
all-cause (indirect)	Denmark	Women	2029	84.8969	87.0612	88.5092	Projected	e0	LL	DNK
all-cause (indirect)	Denmark	Women	2030	85.1219	87.3164	88.7479	Projected	e0	LL	DNK
all-cause (indirect)	Denmark	Women	2031	85.336	87.5545	88.9908	Projected	e0	LL	DNK
all-cause (indirect)	Denmark	Women	2032	85.5676	87.7956	89.2134	Projected	e0	LL	DNK
all-cause (indirect)	Denmark	Women	2033	85.7703	88.0328	89.4369	Projected	e0	LL	DNK
all-cause (indirect)	Denmark	Women	2034	85.9723	88.256	89.638	Projected	e0	LL	DNK
all-cause (indirect)	Denmark	Women	2035	86.1958	88.4742	89.853	Projected	e0	LL	DNK
all-cause (indirect)	Denmark	Women	2036	86.4119	88.6916	90.0542	Projected	e0	LL	DNK
all-cause (indirect)	Denmark	Women	2037	86.6067	88.8955	90.2342	Projected	e0	LL	DNK
all-cause (indirect)	Denmark	Women	2038	86.8011	89.0987	90.4382	Projected	e0	LL	DNK
all-cause (indirect)	Denmark	Women	2039	86.9867	89.2945	90.6075	Projected	e0	LL	DNK
all-cause (indirect)	Denmark	Women	2040	87.1886	89.4848	90.7941	Projected	e0	LL	DNK
all-cause (indirect)	Denmark	Women	2041	87.37	89.6669	90.9646	Projected	e0	LL	DNK
all-cause (indirect)	Denmark	Women	2042	87.5562	89.8469	91.1281	Projected	e0	LL	DNK
all-cause (indirect)	Denmark	Women	2043	87.7444	90.0214	91.2931	Projected	e0	LL	DNK
all-cause (indirect)	Denmark	Women	2044	87.9023	90.1918	91.4457	Projected	e0	LL	DNK
all-cause (indirect)	Denmark	Women	2045	88.0574	90.3584	91.6105	Projected	e0	LL	DNK
all-cause (indirect)	Denmark	Women	2046	88.2188	90.5191	91.7555	Projected	e0	LL	DNK
all-cause (indirect)	Denmark	Women	2047	88.4127	90.677	91.9027	Projected	e0	LL	DNK
all-cause (indirect)	Denmark	Women	2048	88.5572	90.8304	92.0428	Projected	e0	LL	DNK
all-cause (indirect)	Denmark	Women	2049	88.6941	90.9823	92.193	Projected	e0	LL	DNK
all-cause (indirect)	Denmark	Women	2050	88.8726	91.1288	92.3275	Projected	e0	LL	DNK
all-cause (indirect)	Denmark	Women	2051	89.0151	91.2762	92.4642	Projected	e0	LL	DNK
all-cause (indirect)	Denmark	Women	2052	89.1622	91.4177	92.5936	Projected	e0	LL	DNK
all-cause (indirect)	Denmark	Women	2053	89.3095	91.5566	92.7266	Projected	e0	LL	DNK
all-cause (indirect)	Denmark	Women	2054	89.4457	91.6958	92.8486	Projected	e0	LL	DNK
all-cause (indirect)	Denmark	Women	2055	89.6117	91.8276	92.975	Projected	e0	LL	DNK
all-cause (indirect)	Denmark	Women	2056	89.7467	91.9618	93.0973	Projected	e0	LL	DNK
all-cause (indirect)	Denmark	Women	2057	89.9025	92.0904	93.215	Projected	e0	LL	DNK
all-cause (indirect)	Denmark	Women	2058	90.0408	92.2171	93.3343	Projected	e0	LL	DNK
all-cause (indirect)	Denmark	Women	2059	90.2161	92.3479	93.454	Projected	e0	LL	DNK
all-cause (indirect)	Denmark	Women	2060	90.3513	92.4715	93.5696	Projected	e0	LL	DNK
all-cause (indirect)	Denmark	Women	2061	90.4707	92.5952	93.6848	Projected	e0	LL	DNK
all-cause (indirect)	Denmark	Women	2062	90.6027	92.7175	93.7942	Projected	e0	LL	DNK
all-cause (indirect)	Denmark	Women	2063	90.7597	92.8388	93.9069	Projected	e0	LL	DNK
all-cause (indirect)	Denmark	Women	2064	90.8934	92.96	94.0174	Projected	e0	LL	DNK
all-cause (indirect)	Denmark	Women	2065	91.0277	93.0765	94.1222	Projected	e0	LL	DNK
all-cause (indirect)	Finland	Women	1990		78.8914		Observed	e0	LL	FIN
all-cause (indirect)	Finland	Women	1991		79.3212		Observed	e0	LL	FIN
all-cause (indirect)	Finland	Women	1992		79.4363		Observed	e0	LL	FIN
all-cause (indirect)	Finland	Women	1993		79.4792		Observed	e0	LL	FIN
all-cause (indirect)	Finland	Women	1994		80.1472		Observed	e0	LL	FIN
all-cause (indirect)	Finland	Women	1995		80.2135		Observed	e0	LL	FIN
all-cause (indirect)	Finland	Women	1996		80.5444		Observed	e0	LL	FIN
all-cause (indirect)	Finland	Women	1997		80.5205		Observed	e0	LL	FIN
all-cause (indirect)	Finland	Women	1998		80.8382		Observed	e0	LL	FIN
all-cause (indirect)	Finland	Women	1999		81.0358		Observed	e0	LL	FIN
all-cause (indirect)	Finland	Women	2000		81.026		Observed	e0	LL	FIN
all-cause (indirect)	Finland	Women	2001		81.5413		Observed	e0	LL	FIN
all-cause (indirect)	Finland	Women	2002		81.5368		Observed	e0	LL	FIN
all-cause (indirect)	Finland	Women	2003		81.8179		Observed	e0	LL	FIN
all-cause (indirect)	Finland	Women	2004		82.2715		Observed	e0	LL	FIN
all-cause (indirect)	Finland	Women	2005		82.3019		Observed	e0	LL	FIN
all-cause (indirect)	Finland	Women	2006		82.834		Observed	e0	LL	FIN
all-cause (indirect)	Finland	Women	2007		82.8649		Observed	e0	LL	FIN
all-cause (indirect)	Finland	Women	2008		83.0099		Observed	e0	LL	FIN
all-cause (indirect)	Finland	Women	2009		83.1166		Observed	e0	LL	FIN
all-cause (indirect)	Finland	Women	2010		83.2461		Observed	e0	LL	FIN
all-cause (indirect)	Finland	Women	2011		83.5452		Observed	e0	LL	FIN
all-cause (indirect)	Finland	Women	2012		83.4028		Observed	e0	LL	FIN
all-cause (indirect)	Finland	Women	2013		83.8246		Observed	e0	LL	FIN
all-cause (indirect)	Finland	Women	2014		83.8538		Observed	e0	LL	FIN
all-cause (indirect)	Finland	Women	2015	84.0327	84.5766	85.1026	Projected	e0	LL	FIN
all-cause (indirect)	Finland	Women	2016	84.075	84.8012	85.4832	Projected	e0	LL	FIN
all-cause (indirect)	Finland	Women	2017	84.1268	84.9871	85.7701	Projected	e0	LL	FIN
all-cause (indirect)	Finland	Women	2018	84.1816	85.1734	86.0435	Projected	e0	LL	FIN
all-cause (indirect)	Finland	Women	2019	84.2771	85.361	86.3065	Projected	e0	LL	FIN
all-cause (indirect)	Finland	Women	2020	84.3783	85.5507	86.5559	Projected	e0	LL	FIN
all-cause (indirect)	Finland	Women	2021	84.4815	85.7379	86.8071	Projected	e0	LL	FIN
all-cause (indirect)	Finland	Women	2022	84.5994	85.9245	87.043	Projected	e0	LL	FIN
all-cause (indirect)	Finland	Women	2023	84.7165	86.1132	87.2743	Projected	e0	LL	FIN
all-cause (indirect)	Finland	Women	2024	84.8349	86.2922	87.5007	Projected	e0	LL	FIN
all-cause (indirect)	Finland	Women	2025	84.951	86.4768	87.7185	Projected	e0	LL	FIN
all-cause (indirect)	Finland	Women	2026	85.0966	86.6568	87.9378	Projected	e0	LL	FIN
all-cause (indirect)	Finland	Women	2027	85.2378	86.835	88.1503	Projected	e0	LL	FIN
all-cause (indirect)	Finland	Women	2028	85.3757	87.0147	88.3661	Projected	e0	LL	FIN
all-cause (indirect)	Finland	Women	2029	85.5208	87.1901	88.5666	Projected	e0	LL	FIN
all-cause (indirect)	Finland	Women	2030	85.6645	87.3615	88.7663	Projected	e0	LL	FIN
all-cause (indirect)	Finland	Women	2031	85.8031	87.5358	88.9609	Projected	e0	LL	FIN
all-cause (indirect)	Finland	Women	2032	85.9437	87.7114	89.1533	Projected	e0	LL	FIN
all-cause (indirect)	Finland	Women	2033	86.0957	87.8833	89.3457	Projected	e0	LL	FIN
all-cause (indirect)	Finland	Women	2034	86.2415	88.0544	89.5326	Projected	e0	LL	FIN
all-cause (indirect)	Finland	Women	2035	86.3817	88.2232	89.708	Projected	e0	LL	FIN
all-cause (indirect)	Finland	Women	2036	86.5294	88.3911	89.8951	Projected	e0	LL	FIN
all-cause (indirect)	Finland	Women	2037	86.67	88.5632	90.0726	Projected	e0	LL	FIN
all-cause (indirect)	Finland	Women	2038	86.8247	88.7292	90.2464	Projected	e0	LL	FIN
all-cause (indirect)	Finland	Women	2039	86.9702	88.8926	90.4222	Projected	e0	LL	FIN
all-cause (indirect)	Finland	Women	2040	87.1258	89.0605	90.5951	Projected	e0	LL	FIN
all-cause (indirect)	Finland	Women	2041	87.2818	89.2237	90.7632	Projected	e0	LL	FIN
all-cause (indirect)	Finland	Women	2042	87.4412	89.3915	90.9386	Projected	e0	LL	FIN
all-cause (indirect)	Finland	Women	2043	87.5746	89.5496	91.0972	Projected	e0	LL	FIN
all-cause (indirect)	Finland	Women	2044	87.7273	89.714	91.2661	Projected	e0	LL	FIN
all-cause (indirect)	Finland	Women	2045	87.8808	89.8766	91.4179	Projected	e0	LL	FIN
all-cause (indirect)	Finland	Women	2046	88.027	90.0396	91.5796	Projected	e0	LL	FIN
all-cause (indirect)	Finland	Women	2047	88.1708	90.1925	91.7247	Projected	e0	LL	FIN
all-cause (indirect)	Finland	Women	2048	88.3326	90.3457	91.8809	Projected	e0	LL	FIN
all-cause (indirect)	Finland	Women	2049	88.4795	90.4992	92.03	Projected	e0	LL	FIN
all-cause (indirect)	Finland	Women	2050	88.6334	90.655	92.178	Projected	e0	LL	FIN
all-cause (indirect)	Finland	Women	2051	88.7687	90.8004	92.3179	Projected	e0	LL	FIN
all-cause (indirect)	Finland	Women	2052	88.9224	90.9511	92.4667	Projected	e0	LL	FIN
all-cause (indirect)	Finland	Women	2053	89.0736	91.0932	92.5989	Projected	e0	LL	FIN
all-cause (indirect)	Finland	Women	2054	89.1939	91.2369	92.7358	Projected	e0	LL	FIN
all-cause (indirect)	Finland	Women	2055	89.3424	91.3737	92.8718	Projected	e0	LL	FIN
all-cause (indirect)	Finland	Women	2056	89.4678	91.5133	93.0026	Projected	e0	LL	FIN
all-cause (indirect)	Finland	Women	2057	89.5978	91.6456	93.1359	Projected	e0	LL	FIN
all-cause (indirect)	Finland	Women	2058	89.7478	91.7843	93.2619	Projected	e0	LL	FIN
all-cause (indirect)	Finland	Women	2059	89.8898	91.9206	93.3947	Projected	e0	LL	FIN
all-cause (indirect)	Finland	Women	2060	90.0242	92.05	93.5132	Projected	e0	LL	FIN
all-cause (indirect)	Finland	Women	2061	90.1567	92.1811	93.6413	Projected	e0	LL	FIN
all-cause (indirect)	Finland	Women	2062	90.3012	92.3123	93.7586	Projected	e0	LL	FIN
all-cause (indirect)	Finland	Women	2063	90.4175	92.438	93.881	Projected	e0	LL	FIN
all-cause (indirect)	Finland	Women	2064	90.5475	92.5649	93.9986	Projected	e0	LL	FIN
all-cause (indirect)	Finland	Women	2065	90.6773	92.6878	94.1087	Projected	e0	LL	FIN
all-cause (indirect)	France	Women	1990		80.9714		Observed	e0	LL	FRATNP
all-cause (indirect)	France	Women	1991		81.171		Observed	e0	LL	FRATNP
all-cause (indirect)	France	Women	1992		81.4625		Observed	e0	LL	FRATNP
all-cause (indirect)	France	Women	1993		81.4646		Observed	e0	LL	FRATNP
all-cause (indirect)	France	Women	1994		81.8914		Observed	e0	LL	FRATNP
all-cause (indirect)	France	Women	1995		81.9002		Observed	e0	LL	FRATNP
all-cause (indirect)	France	Women	1996		82.0544		Observed	e0	LL	FRATNP
all-cause (indirect)	France	Women	1997		82.3087		Observed	e0	LL	FRATNP
all-cause (indirect)	France	Women	1998		82.4136		Observed	e0	LL	FRATNP
all-cause (indirect)	France	Women	1999		82.5177		Observed	e0	LL	FRATNP
all-cause (indirect)	France	Women	2000		82.8005		Observed	e0	LL	FRATNP
all-cause (indirect)	France	Women	2001		82.9422		Observed	e0	LL	FRATNP
all-cause (indirect)	France	Women	2002		83.0389		Observed	e0	LL	FRATNP
all-cause (indirect)	France	Women	2003		82.9489		Observed	e0	LL	FRATNP
all-cause (indirect)	France	Women	2004		83.8595		Observed	e0	LL	FRATNP
all-cause (indirect)	France	Women	2005		83.8142		Observed	e0	LL	FRATNP
all-cause (indirect)	France	Women	2006		84.1692		Observed	e0	LL	FRATNP
all-cause (indirect)	France	Women	2007		84.3764		Observed	e0	LL	FRATNP
all-cause (indirect)	France	Women	2008		84.3235		Observed	e0	LL	FRATNP
all-cause (indirect)	France	Women	2009		84.4212		Observed	e0	LL	FRATNP
all-cause (indirect)	France	Women	2010		84.6604		Observed	e0	LL	FRATNP
all-cause (indirect)	France	Women	2011		84.9926		Observed	e0	LL	FRATNP
all-cause (indirect)	France	Women	2012		84.8419		Observed	e0	LL	FRATNP
all-cause (indirect)	France	Women	2013		85.0445		Observed	e0	LL	FRATNP
all-cause (indirect)	France	Women	2014		85.4386		Observed	e0	LL	FRATNP
all-cause (indirect)	France	Women	2015	85.5413	85.9765	86.3923	Projected	e0	LL	FRATNP
all-cause (indirect)	France	Women	2016	85.5882	86.1773	86.7208	Projected	e0	LL	FRATNP
all-cause (indirect)	France	Women	2017	85.6641	86.3719	86.9816	Projected	e0	LL	FRATNP
all-cause (indirect)	France	Women	2018	85.6871	86.566	87.2523	Projected	e0	LL	FRATNP
all-cause (indirect)	France	Women	2019	85.702	86.7627	87.5115	Projected	e0	LL	FRATNP
all-cause (indirect)	France	Women	2020	85.7565	86.9586	87.7513	Projected	e0	LL	FRATNP
all-cause (indirect)	France	Women	2021	85.8531	87.158	87.9879	Projected	e0	LL	FRATNP
all-cause (indirect)	France	Women	2022	85.9901	87.3522	88.1995	Projected	e0	LL	FRATNP
all-cause (indirect)	France	Women	2023	86.1418	87.5451	88.4242	Projected	e0	LL	FRATNP
all-cause (indirect)	France	Women	2024	86.3169	87.7397	88.627	Projected	e0	LL	FRATNP
all-cause (indirect)	France	Women	2025	86.5009	87.9274	88.838	Projected	e0	LL	FRATNP
all-cause (indirect)	France	Women	2026	86.6768	88.1219	89.043	Projected	e0	LL	FRATNP
all-cause (indirect)	France	Women	2027	86.8695	88.312	89.2426	Projected	e0	LL	FRATNP
all-cause (indirect)	France	Women	2028	87.0635	88.5002	89.4446	Projected	e0	LL	FRATNP
all-cause (indirect)	France	Women	2029	87.2631	88.6872	89.6449	Projected	e0	LL	FRATNP
all-cause (indirect)	France	Women	2030	87.4641	88.8736	89.8354	Projected	e0	LL	FRATNP
all-cause (indirect)	France	Women	2031	87.6738	89.0574	90.0308	Projected	e0	LL	FRATNP
all-cause (indirect)	France	Women	2032	87.8726	89.2425	90.2236	Projected	e0	LL	FRATNP
all-cause (indirect)	France	Women	2033	88.0799	89.4224	90.4035	Projected	e0	LL	FRATNP
all-cause (indirect)	France	Women	2034	88.2851	89.6018	90.6017	Projected	e0	LL	FRATNP
all-cause (indirect)	France	Women	2035	88.4793	89.775	90.7788	Projected	e0	LL	FRATNP
all-cause (indirect)	France	Women	2036	88.6725	89.9522	90.96	Projected	e0	LL	FRATNP
all-cause (indirect)	France	Women	2037	88.8624	90.1226	91.1337	Projected	e0	LL	FRATNP
all-cause (indirect)	France	Women	2038	89.0492	90.2915	91.3176	Projected	e0	LL	FRATNP
all-cause (indirect)	France	Women	2039	89.2346	90.4586	91.4844	Projected	e0	LL	FRATNP
all-cause (indirect)	France	Women	2040	89.4076	90.6242	91.6642	Projected	e0	LL	FRATNP
all-cause (indirect)	France	Women	2041	89.5889	90.783	91.835	Projected	e0	LL	FRATNP
all-cause (indirect)	France	Women	2042	89.7612	90.9411	92.0024	Projected	e0	LL	FRATNP
all-cause (indirect)	France	Women	2043	89.9267	91.0995	92.1651	Projected	e0	LL	FRATNP
all-cause (indirect)	France	Women	2044	90.0776	91.2539	92.3272	Projected	e0	LL	FRATNP
all-cause (indirect)	France	Women	2045	90.2384	91.4064	92.4905	Projected	e0	LL	FRATNP
all-cause (indirect)	France	Women	2046	90.3852	91.5559	92.6561	Projected	e0	LL	FRATNP
all-cause (indirect)	France	Women	2047	90.538	91.7067	92.815	Projected	e0	LL	FRATNP
all-cause (indirect)	France	Women	2048	90.6863	91.8496	92.9619	Projected	e0	LL	FRATNP
all-cause (indirect)	France	Women	2049	90.8222	91.9958	93.1271	Projected	e0	LL	FRATNP
all-cause (indirect)	France	Women	2050	90.9527	92.1364	93.2732	Projected	e0	LL	FRATNP
all-cause (indirect)	France	Women	2051	91.0879	92.2757	93.4152	Projected	e0	LL	FRATNP
all-cause (indirect)	France	Women	2052	91.2185	92.4127	93.5714	Projected	e0	LL	FRATNP
all-cause (indirect)	France	Women	2053	91.3404	92.5448	93.7154	Projected	e0	LL	FRATNP
all-cause (indirect)	France	Women	2054	91.4693	92.6795	93.8624	Projected	e0	LL	FRATNP
all-cause (indirect)	France	Women	2055	91.589	92.8088	94.0082	Projected	e0	LL	FRATNP
all-cause (indirect)	France	Women	2056	91.7045	92.9375	94.1515	Projected	e0	LL	FRATNP
all-cause (indirect)	France	Women	2057	91.818	93.063	94.2868	Projected	e0	LL	FRATNP
all-cause (indirect)	France	Women	2058	91.927	93.1889	94.4241	Projected	e0	LL	FRATNP
all-cause (indirect)	France	Women	2059	92.0415	93.3115	94.5589	Projected	e0	LL	FRATNP
all-cause (indirect)	France	Women	2060	92.1518	93.4317	94.6945	Projected	e0	LL	FRATNP
all-cause (indirect)	France	Women	2061	92.2536	93.5545	94.8252	Projected	e0	LL	FRATNP
all-cause (indirect)	France	Women	2062	92.3609	93.6724	94.9587	Projected	e0	LL	FRATNP
all-cause (indirect)	France	Women	2063	92.4645	93.7881	95.0869	Projected	e0	LL	FRATNP
all-cause (indirect)	France	Women	2064	92.5667	93.901	95.2131	Projected	e0	LL	FRATNP
all-cause (indirect)	France	Women	2065	92.6591	94.015	95.3303	Projected	e0	LL	FRATNP
all-cause (indirect)	Germany	Women	1990		78.4222		Observed	e0	LL	DEUTNP
all-cause (indirect)	Germany	Women	1991		78.6881		Observed	e0	LL	DEUTNP
all-cause (indirect)	Germany	Women	1992		79.1435		Observed	e0	LL	DEUTNP
all-cause (indirect)	Germany	Women	1993		79.2161		Observed	e0	LL	DEUTNP
all-cause (indirect)	Germany	Women	1994		79.5139		Observed	e0	LL	DEUTNP
all-cause (indirect)	Germany	Women	1995		79.6924		Observed	e0	LL	DEUTNP
all-cause (indirect)	Germany	Women	1996		79.8625		Observed	e0	LL	DEUTNP
all-cause (indirect)	Germany	Women	1997		80.2715		Observed	e0	LL	DEUTNP
all-cause (indirect)	Germany	Women	1998		80.5374		Observed	e0	LL	DEUTNP
all-cause (indirect)	Germany	Women	1999		80.7461		Observed	e0	LL	DEUTNP
all-cause (indirect)	Germany	Women	2000		80.9931		Observed	e0	LL	DEUTNP
all-cause (indirect)	Germany	Women	2001		81.2732		Observed	e0	LL	DEUTNP
all-cause (indirect)	Germany	Women	2002		81.2791		Observed	e0	LL	DEUTNP
all-cause (indirect)	Germany	Women	2003		81.3656		Observed	e0	LL	DEUTNP
all-cause (indirect)	Germany	Women	2004		81.8912		Observed	e0	LL	DEUTNP
all-cause (indirect)	Germany	Women	2005		81.9669		Observed	e0	LL	DEUTNP
all-cause (indirect)	Germany	Women	2006		82.2412		Observed	e0	LL	DEUTNP
all-cause (indirect)	Germany	Women	2007		82.402		Observed	e0	LL	DEUTNP
all-cause (indirect)	Germany	Women	2008		82.3936		Observed	e0	LL	DEUTNP
all-cause (indirect)	Germany	Women	2009		82.4857		Observed	e0	LL	DEUTNP
all-cause (indirect)	Germany	Women	2010		82.6186		Observed	e0	LL	DEUTNP
all-cause (indirect)	Germany	Women	2011		82.8302		Observed	e0	LL	DEUTNP
all-cause (indirect)	Germany	Women	2012		82.9419		Observed	e0	LL	DEUTNP
all-cause (indirect)	Germany	Women	2013		82.8622		Observed	e0	LL	DEUTNP
all-cause (indirect)	Germany	Women	2014		83.3458		Observed	e0	LL	DEUTNP
all-cause (indirect)	Germany	Women	2015	83.3031	84.0008	84.6744	Projected	e0	LL	DEUTNP
all-cause (indirect)	Germany	Women	2016	83.3691	84.22	85.0304	Projected	e0	LL	DEUTNP
all-cause (indirect)	Germany	Women	2017	83.4546	84.4111	85.3319	Projected	e0	LL	DEUTNP
all-cause (indirect)	Germany	Women	2018	83.5326	84.6069	85.6123	Projected	e0	LL	DEUTNP
all-cause (indirect)	Germany	Women	2019	83.6408	84.8017	85.8819	Projected	e0	LL	DEUTNP
all-cause (indirect)	Germany	Women	2020	83.741	84.9982	86.1475	Projected	e0	LL	DEUTNP
all-cause (indirect)	Germany	Women	2021	83.869	85.1887	86.4182	Projected	e0	LL	DEUTNP
all-cause (indirect)	Germany	Women	2022	83.9962	85.387	86.6601	Projected	e0	LL	DEUTNP
all-cause (indirect)	Germany	Women	2023	84.1274	85.5809	86.9216	Projected	e0	LL	DEUTNP
all-cause (indirect)	Germany	Women	2024	84.2613	85.7749	87.1581	Projected	e0	LL	DEUTNP
all-cause (indirect)	Germany	Women	2025	84.4019	85.9728	87.4047	Projected	e0	LL	DEUTNP
all-cause (indirect)	Germany	Women	2026	84.5708	86.1724	87.646	Projected	e0	LL	DEUTNP
all-cause (indirect)	Germany	Women	2027	84.711	86.3694	87.875	Projected	e0	LL	DEUTNP
all-cause (indirect)	Germany	Women	2028	84.8745	86.5673	88.0873	Projected	e0	LL	DEUTNP
all-cause (indirect)	Germany	Women	2029	85.0435	86.7659	88.3203	Projected	e0	LL	DEUTNP
all-cause (indirect)	Germany	Women	2030	85.2035	86.9657	88.5422	Projected	e0	LL	DEUTNP
all-cause (indirect)	Germany	Women	2031	85.3575	87.1558	88.7679	Projected	e0	LL	DEUTNP
all-cause (indirect)	Germany	Women	2032	85.5235	87.3584	88.9796	Projected	e0	LL	DEUTNP
all-cause (indirect)	Germany	Women	2033	85.6955	87.5492	89.1953	Projected	e0	LL	DEUTNP
all-cause (indirect)	Germany	Women	2034	85.8614	87.743	89.4015	Projected	e0	LL	DEUTNP
all-cause (indirect)	Germany	Women	2035	86.038	87.9342	89.6069	Projected	e0	LL	DEUTNP
all-cause (indirect)	Germany	Women	2036	86.207	88.1257	89.8169	Projected	e0	LL	DEUTNP
all-cause (indirect)	Germany	Women	2037	86.3772	88.319	90.0214	Projected	e0	LL	DEUTNP
all-cause (indirect)	Germany	Women	2038	86.5539	88.5045	90.2327	Projected	e0	LL	DEUTNP
all-cause (indirect)	Germany	Women	2039	86.7223	88.6891	90.4135	Projected	e0	LL	DEUTNP
all-cause (indirect)	Germany	Women	2040	86.8865	88.8711	90.6159	Projected	e0	LL	DEUTNP
all-cause (indirect)	Germany	Women	2041	87.0511	89.0561	90.814	Projected	e0	LL	DEUTNP
all-cause (indirect)	Germany	Women	2042	87.2224	89.2384	91.0048	Projected	e0	LL	DEUTNP
all-cause (indirect)	Germany	Women	2043	87.3812	89.4189	91.1981	Projected	e0	LL	DEUTNP
all-cause (indirect)	Germany	Women	2044	87.5327	89.5978	91.3658	Projected	e0	LL	DEUTNP
all-cause (indirect)	Germany	Women	2045	87.6978	89.771	91.56	Projected	e0	LL	DEUTNP
all-cause (indirect)	Germany	Women	2046	87.8584	89.94	91.7384	Projected	e0	LL	DEUTNP
all-cause (indirect)	Germany	Women	2047	88.0236	90.1044	91.9138	Projected	e0	LL	DEUTNP
all-cause (indirect)	Germany	Women	2048	88.1686	90.2698	92.0789	Projected	e0	LL	DEUTNP
all-cause (indirect)	Germany	Women	2049	88.3017	90.4295	92.2499	Projected	e0	LL	DEUTNP
all-cause (indirect)	Germany	Women	2050	88.466	90.5892	92.4161	Projected	e0	LL	DEUTNP
all-cause (indirect)	Germany	Women	2051	88.6086	90.7431	92.5701	Projected	e0	LL	DEUTNP
all-cause (indirect)	Germany	Women	2052	88.744	90.8943	92.7276	Projected	e0	LL	DEUTNP
all-cause (indirect)	Germany	Women	2053	88.8713	91.0417	92.8734	Projected	e0	LL	DEUTNP
all-cause (indirect)	Germany	Women	2054	89.0111	91.1829	93.0224	Projected	e0	LL	DEUTNP
all-cause (indirect)	Germany	Women	2055	89.1528	91.3242	93.1636	Projected	e0	LL	DEUTNP
all-cause (indirect)	Germany	Women	2056	89.2858	91.4662	93.3055	Projected	e0	LL	DEUTNP
all-cause (indirect)	Germany	Women	2057	89.4099	91.5966	93.438	Projected	e0	LL	DEUTNP
all-cause (indirect)	Germany	Women	2058	89.5545	91.7315	93.5768	Projected	e0	LL	DEUTNP
all-cause (indirect)	Germany	Women	2059	89.6718	91.8631	93.7076	Projected	e0	LL	DEUTNP
all-cause (indirect)	Germany	Women	2060	89.7966	91.9911	93.8447	Projected	e0	LL	DEUTNP
all-cause (indirect)	Germany	Women	2061	89.9241	92.1206	93.9752	Projected	e0	LL	DEUTNP
all-cause (indirect)	Germany	Women	2062	90.0578	92.2486	94.1109	Projected	e0	LL	DEUTNP
all-cause (indirect)	Germany	Women	2063	90.1874	92.3744	94.2264	Projected	e0	LL	DEUTNP
all-cause (indirect)	Germany	Women	2064	90.3006	92.5003	94.3527	Projected	e0	LL	DEUTNP
all-cause (indirect)	Germany	Women	2065	90.4207	92.616	94.4762	Projected	e0	LL	DEUTNP
all-cause (indirect)	Greece	Women	1990		79.6479		Observed	e0	LL	GRC
all-cause (indirect)	Greece	Women	1991		79.8676		Observed	e0	LL	GRC
all-cause (indirect)	Greece	Women	1992		79.7839		Observed	e0	LL	GRC
all-cause (indirect)	Greece	Women	1993		80.0891		Observed	e0	LL	GRC
all-cause (indirect)	Greece	Women	1994		80.3439		Observed	e0	LL	GRC
all-cause (indirect)	Greece	Women	1995		80.4358		Observed	e0	LL	GRC
all-cause (indirect)	Greece	Women	1996		80.6022		Observed	e0	LL	GRC
all-cause (indirect)	Greece	Women	1997		80.9356		Observed	e0	LL	GRC
all-cause (indirect)	Greece	Women	1998		80.8165		Observed	e0	LL	GRC
all-cause (indirect)	Greece	Women	1999		81.0317		Observed	e0	LL	GRC
all-cause (indirect)	Greece	Women	2000		81.294		Observed	e0	LL	GRC
all-cause (indirect)	Greece	Women	2001		81.7118		Observed	e0	LL	GRC
all-cause (indirect)	Greece	Women	2002		81.8138		Observed	e0	LL	GRC
all-cause (indirect)	Greece	Women	2003		81.953		Observed	e0	LL	GRC
all-cause (indirect)	Greece	Women	2004		82.1713		Observed	e0	LL	GRC
all-cause (indirect)	Greece	Women	2005		82.4308		Observed	e0	LL	GRC
all-cause (indirect)	Greece	Women	2006		82.6679		Observed	e0	LL	GRC
all-cause (indirect)	Greece	Women	2007		82.5248		Observed	e0	LL	GRC
all-cause (indirect)	Greece	Women	2008		82.9777		Observed	e0	LL	GRC
all-cause (indirect)	Greece	Women	2009		83.1894		Observed	e0	LL	GRC
all-cause (indirect)	Greece	Women	2010		83.1822		Observed	e0	LL	GRC
all-cause (indirect)	Greece	Women	2011		83.3792		Observed	e0	LL	GRC
all-cause (indirect)	Greece	Women	2012		83.2114		Observed	e0	LL	GRC
all-cause (indirect)	Greece	Women	2013		83.6913		Observed	e0	LL	GRC
all-cause (indirect)	Greece	Women	2014		83.828		Observed	e0	LL	GRC
all-cause (indirect)	Greece	Women	2015	83.7087	84.2724	84.8137	Projected	e0	LL	GRC
all-cause (indirect)	Greece	Women	2016	83.7604	84.4473	85.1024	Projected	e0	LL	GRC
all-cause (indirect)	Greece	Women	2017	83.8707	84.6338	85.3624	Projected	e0	LL	GRC
all-cause (indirect)	Greece	Women	2018	83.9714	84.816	85.6181	Projected	e0	LL	GRC
all-cause (indirect)	Greece	Women	2019	84.103	85.0034	85.8651	Projected	e0	LL	GRC
all-cause (indirect)	Greece	Women	2020	84.2125	85.1905	86.1046	Projected	e0	LL	GRC
all-cause (indirect)	Greece	Women	2021	84.3489	85.379	86.3549	Projected	e0	LL	GRC
all-cause (indirect)	Greece	Women	2022	84.4816	85.5719	86.5887	Projected	e0	LL	GRC
all-cause (indirect)	Greece	Women	2023	84.6331	85.762	86.8215	Projected	e0	LL	GRC
all-cause (indirect)	Greece	Women	2024	84.776	85.9561	87.0606	Projected	e0	LL	GRC
all-cause (indirect)	Greece	Women	2025	84.9232	86.1498	87.286	Projected	e0	LL	GRC
all-cause (indirect)	Greece	Women	2026	85.0803	86.3445	87.5284	Projected	e0	LL	GRC
all-cause (indirect)	Greece	Women	2027	85.2292	86.541	87.7468	Projected	e0	LL	GRC
all-cause (indirect)	Greece	Women	2028	85.3952	86.7351	87.9744	Projected	e0	LL	GRC
all-cause (indirect)	Greece	Women	2029	85.5523	86.9274	88.1968	Projected	e0	LL	GRC
all-cause (indirect)	Greece	Women	2030	85.7042	87.1207	88.4194	Projected	e0	LL	GRC
all-cause (indirect)	Greece	Women	2031	85.8665	87.3082	88.6373	Projected	e0	LL	GRC
all-cause (indirect)	Greece	Women	2032	86.0316	87.4986	88.8422	Projected	e0	LL	GRC
all-cause (indirect)	Greece	Women	2033	86.1901	87.6842	89.0663	Projected	e0	LL	GRC
all-cause (indirect)	Greece	Women	2034	86.3429	87.8672	89.2706	Projected	e0	LL	GRC
all-cause (indirect)	Greece	Women	2035	86.5082	88.0506	89.4772	Projected	e0	LL	GRC
all-cause (indirect)	Greece	Women	2036	86.6513	88.225	89.6671	Projected	e0	LL	GRC
all-cause (indirect)	Greece	Women	2037	86.7951	88.3946	89.8632	Projected	e0	LL	GRC
all-cause (indirect)	Greece	Women	2038	86.9364	88.5682	90.0487	Projected	e0	LL	GRC
all-cause (indirect)	Greece	Women	2039	87.0868	88.7387	90.2516	Projected	e0	LL	GRC
all-cause (indirect)	Greece	Women	2040	87.2234	88.9022	90.4313	Projected	e0	LL	GRC
all-cause (indirect)	Greece	Women	2041	87.3652	89.0663	90.6172	Projected	e0	LL	GRC
all-cause (indirect)	Greece	Women	2042	87.5204	89.2287	90.789	Projected	e0	LL	GRC
all-cause (indirect)	Greece	Women	2043	87.6504	89.3837	90.9724	Projected	e0	LL	GRC
all-cause (indirect)	Greece	Women	2044	87.7825	89.5414	91.1403	Projected	e0	LL	GRC
all-cause (indirect)	Greece	Women	2045	87.9194	89.6923	91.3097	Projected	e0	LL	GRC
all-cause (indirect)	Greece	Women	2046	88.0568	89.8454	91.4823	Projected	e0	LL	GRC
all-cause (indirect)	Greece	Women	2047	88.1898	89.9905	91.6411	Projected	e0	LL	GRC
all-cause (indirect)	Greece	Women	2048	88.3252	90.1427	91.8053	Projected	e0	LL	GRC
all-cause (indirect)	Greece	Women	2049	88.4573	90.2866	91.9747	Projected	e0	LL	GRC
all-cause (indirect)	Greece	Women	2050	88.5804	90.4361	92.1274	Projected	e0	LL	GRC
all-cause (indirect)	Greece	Women	2051	88.7187	90.5761	92.2765	Projected	e0	LL	GRC
all-cause (indirect)	Greece	Women	2052	88.8271	90.7184	92.4362	Projected	e0	LL	GRC
all-cause (indirect)	Greece	Women	2053	88.9649	90.863	92.5822	Projected	e0	LL	GRC
all-cause (indirect)	Greece	Women	2054	89.0881	91.0068	92.7444	Projected	e0	LL	GRC
all-cause (indirect)	Greece	Women	2055	89.2087	91.1388	92.8839	Projected	e0	LL	GRC
all-cause (indirect)	Greece	Women	2056	89.3394	91.2779	93.033	Projected	e0	LL	GRC
all-cause (indirect)	Greece	Women	2057	89.4459	91.4108	93.1736	Projected	e0	LL	GRC
all-cause (indirect)	Greece	Women	2058	89.5812	91.5472	93.3211	Projected	e0	LL	GRC
all-cause (indirect)	Greece	Women	2059	89.7038	91.6759	93.46	Projected	e0	LL	GRC
all-cause (indirect)	Greece	Women	2060	89.83	91.807	93.5895	Projected	e0	LL	GRC
all-cause (indirect)	Greece	Women	2061	89.9526	91.9412	93.7345	Projected	e0	LL	GRC
all-cause (indirect)	Greece	Women	2062	90.0751	92.0693	93.8711	Projected	e0	LL	GRC
all-cause (indirect)	Greece	Women	2063	90.1842	92.1946	93.9923	Projected	e0	LL	GRC
all-cause (indirect)	Greece	Women	2064	90.2986	92.3217	94.1281	Projected	e0	LL	GRC
all-cause (indirect)	Greece	Women	2065	90.4064	92.4435	94.2482	Projected	e0	LL	GRC
all-cause (indirect)	Hungary	Women	1990		73.7714		Observed	e0	LL	HUN
all-cause (indirect)	Hungary	Women	1991		73.9663		Observed	e0	LL	HUN
all-cause (indirect)	Hungary	Women	1992		73.9365		Observed	e0	LL	HUN
all-cause (indirect)	Hungary	Women	1993		73.9806		Observed	e0	LL	HUN
all-cause (indirect)	Hungary	Women	1994		74.4571		Observed	e0	LL	HUN
all-cause (indirect)	Hungary	Women	1995		74.7186		Observed	e0	LL	HUN
all-cause (indirect)	Hungary	Women	1996		74.9992		Observed	e0	LL	HUN
all-cause (indirect)	Hungary	Women	1997		75.4481		Observed	e0	LL	HUN
all-cause (indirect)	Hungary	Women	1998		75.5252		Observed	e0	LL	HUN
all-cause (indirect)	Hungary	Women	1999		75.4967		Observed	e0	LL	HUN
all-cause (indirect)	Hungary	Women	2000		76.0315		Observed	e0	LL	HUN
all-cause (indirect)	Hungary	Women	2001		76.5592		Observed	e0	LL	HUN
all-cause (indirect)	Hungary	Women	2002		76.6822		Observed	e0	LL	HUN
all-cause (indirect)	Hungary	Women	2003		76.6612		Observed	e0	LL	HUN
all-cause (indirect)	Hungary	Women	2004		77.0994		Observed	e0	LL	HUN
all-cause (indirect)	Hungary	Women	2005		77.0725		Observed	e0	LL	HUN
all-cause (indirect)	Hungary	Women	2006		77.5611		Observed	e0	LL	HUN
all-cause (indirect)	Hungary	Women	2007		77.5332		Observed	e0	LL	HUN
all-cause (indirect)	Hungary	Women	2008		77.9869		Observed	e0	LL	HUN
all-cause (indirect)	Hungary	Women	2009		78.1295		Observed	e0	LL	HUN
all-cause (indirect)	Hungary	Women	2010		78.3259		Observed	e0	LL	HUN
all-cause (indirect)	Hungary	Women	2011		78.4954		Observed	e0	LL	HUN
all-cause (indirect)	Hungary	Women	2012		78.6187		Observed	e0	LL	HUN
[truncated: 737 more rows]
