# Supplementary material for: Future life expectancy in Europe taking into account the impact of smoking, obesity, and alcohol
Source: eLife. 2021 Jul 6;10:e66590. doi: 10.7554/eLife.66590 (PMC8337079; doi:10.7554/eLife.66590)
Supplement: Table 1—source data 1. [file elife-66590-table1-data1.xlsx]

## Sheet: e0
Life expectancy at birth (e0)
sex	country	1990_all-cause	1990_non-lifestyle	2014_all-cause	2014_non-lifestyle
Female	Austria	78.8662	80.4182	83.732	85.7058
Female	Belgium	79.3354	80.9634	83.5194	85.8588
Female	Czech Republic	75.4018	77.4433	81.7319	84.0648
Female	Denmark	77.7313	80.9934	82.6674	86.0045
Female	Finland	78.8914	80.2543	83.8538	85.8113
Female	France	80.9714	82.3594	85.4386	87.1996
Female	Germany	78.4222	80.2168	83.3458	85.669
Female	Greece	79.6479	81.1269	83.828	85.3581
Female	Hungary	73.7714	76.9148	79.2436	83.0727
Female	Ireland	77.7114	80.3432	83.2272	86.2454
Female	Italy	80.2521	81.8414	85.1619	86.8129
Female	Netherlands	80.0879	81.6286	83.2912	86.1293
Female	Norway	79.8064	81.3653	84.0921	86.5771
Female	Poland	75.283	77.2073	81.4139	84.2481
Female	Slovenia	77.6897	79.3203	83.6853	85.71
Female	Spain	80.5593	81.9645	85.6117	87.1636
Female	Sweden	80.3933	81.8403	84.0495	86.1916
Female	Switzerland	80.7168	81.9961	85.1119	86.7559
Female	United Kingdom	78.4968	81.4108	82.9855	86.0821
Male	Austria	72.226	77.6666	78.9134	82.7157
Male	Belgium	72.6959	78.7414	78.5727	82.9602
Male	Czech Republic	67.5308	75.1384	75.7177	80.6374
Male	Denmark	72.0205	77.4574	78.5638	82.4395
Male	Finland	70.9407	76.7344	78.1287	81.9213
Male	France	72.7201	78.8101	79.2806	83.759
Male	Germany	71.9098	77.5499	78.4329	82.5386
Male	Greece	74.6593	79.4811	78.4575	82.9171
Male	Hungary	65.1422	74.6883	72.2596	80.3017
Male	Ireland	72.1216	76.6854	79.1545	82.6579
Male	Italy	73.6307	79.1677	80.5518	83.8332
Male	Netherlands	73.8192	79.0467	79.8725	83.2431
Male	Norway	73.4447	76.7051	80.0269	82.8044
Male	Poland	66.2504	73.597	73.6577	80.1527
Male	Slovenia	69.7674	76.4023	77.9646	82.0271
Male	Spain	73.4311	78.8465	80.0789	84.2792
Male	Sweden	74.8088	77.5679	80.35	82.6587
Male	Switzerland	73.9552	78.3755	80.9325	83.6253
Male	United Kingdom	72.8378	77.9015	79.2473	82.793
