# Supplementary material for: Future life expectancy in Europe taking into account the impact of smoking, obesity, and alcohol
Source: eLife. 2021 Jul 6;10:e66590. doi: 10.7554/eLife.66590 (PMC8337079; doi:10.7554/eLife.66590)
Supplement: Table 2—source data 1. [file elife-66590-table2-data1.xlsx]

## Sheet: Tables
sex	country	2014_all-cause	2014_non-lifestyle	2065_all-cause (direct)_LC	2065_all-cause (direct)_LL	2065_non-lifestyle_LC	2065_non-lifestyle_LL	2065_all-cause (indirect)_LC	2065_all-cause (indirect)_LL
Female	Austria	83.732	85.7058	91.4156	91.5802	93.1412	93.1668	92.5715	92.5425
Female	Belgium	83.5194	85.8588	90.0863	91.5071	92.9774	93.5127	92.4277	92.9826
Female	Czech Republic	81.7319	84.0648	90.8717	90.0526	92.8102	92.0051	92.278	91.3665
Female	Denmark	82.6674	86.0045	89.6616	90.9667	93.8189	93.5213	93.325	93.0765
Female	Finland	83.8538	85.8113	90.8965	91.648	93.2575	93.3296	92.6518	92.6878
Female	France	85.4386	87.1996	92.7676	92.8973	94.7266	94.4641	94.2437	94.015
Female	Germany	83.3458	85.669	90.7755	91.2449	93.1584	93.2478	92.6001	92.616
Female	Greece	83.828	85.3581	89.7513	91.5238	91.1619	93.0144	90.5079	92.4435
Female	Hungary	79.2436	83.0727	87.0883	88.7326	90.893	91.6674	90.2134	90.9561
Female	Ireland	83.2272	86.2454	91.6703	91.5551	94.9311	93.9872	94.375	93.3957
Female	Italy	85.1619	86.8129	92.3021	92.5359	93.9129	94.0892	93.3355	93.5256
Female	Netherlands	83.2912	86.1293	88.8021	91.2962	93.0273	93.5802	92.5936	93.1811
Female	Norway	84.0921	86.5771	90.7216	91.7136	93.869	93.7505	93.4777	93.3482
Female	Poland	81.4139	84.2481	90.4374	90.4017	93.4115	92.6458	92.7367	91.8766
Female	Slovenia	83.6853	85.71	92.1967	91.4206	94.2341	93.1532	93.7906	92.6009
Female	Sweden	84.0495	86.1916	89.9162	91.6681	92.6798	93.3993	92.2667	93.0103
Female	Switzerland	85.1119	86.7559	91.4131	92.2306	93.193	93.6683	92.6985	93.1594
Female	United Kingdom	82.9855	86.0821	89.9286	91.4012	93.2066	93.8021	92.6984	93.341
Male	Austria	78.9134	82.7157	88.9062	88.8489	90.2763	91.4271	89.0181	90.3791
Male	Belgium	78.5727	82.9602	87.763	88.5711	89.2573	91.689	88.1993	90.9276
Male	Czech Republic	75.7177	80.6374	87.7739	86.6777	88.9303	90.2014	87.2265	88.8574
Male	Denmark	78.5638	82.4395	87.7237	88.4898	89.5349	91.4325	88.4765	90.5012
Male	Finland	78.1287	81.9213	88.2492	88.3588	89.3664	91.1463	88.2957	90.2211
Male	France	79.2806	83.759	89.1094	89.441	91.1887	92.2616	90.0261	91.3952
Male	Germany	78.4329	82.5386	88.3561	88.4709	90.1441	91.3665	88.6687	90.176
Male	Greece	78.4575	82.9171	85.0685	88.9771	88.3233	92.0551	86.3208	90.9698
Male	Hungary	72.2596	80.3017	81.7354	84.2934	87.7831	90.1931	85.8936	88.6435
Male	Ireland	79.1545	82.6579	89.5889	88.9867	91.3371	91.6961	90.572	90.9464
Male	Italy	80.5518	83.8332	89.2547	89.6256	90.196	92.1922	89.1423	91.4297
Male	Netherlands	79.8725	83.2431	88.6684	89.172	89.5353	91.786	88.733	91.1127
Male	Norway	80.0269	82.8044	88.858	89.1266	90.8527	91.5318	90.2274	90.8698
Male	Poland	73.6577	80.1527	85.2129	85.7603	89.7292	90.5846	88.2802	89.3701
Male	Slovenia	77.9646	82.0271	88.6828	88.0142	90.0736	90.846	88.9452	89.9105
Male	Sweden	80.35	82.6587	88.3734	89.3793	89.877	91.3064	89.1813	90.6419
Male	Switzerland	80.9325	83.6253	89.7714	89.8665	90.4951	91.9227	89.3071	90.88
Male	United Kingdom	79.2473	82.793	88.9925	89.1713	90.2532	91.7765	89.3514	91.0386
